# Supplementary material for: Next Generation Sequencing and Comparative Genomic Analysis Reveal Extreme Plasticity of Two Burkholderia glumae Strains HN1 and HN2
Source: MDPI journal article supplement (doi:10.3390/pathogens11111265), 2022-10-30
Supplement: s1 [file s1]

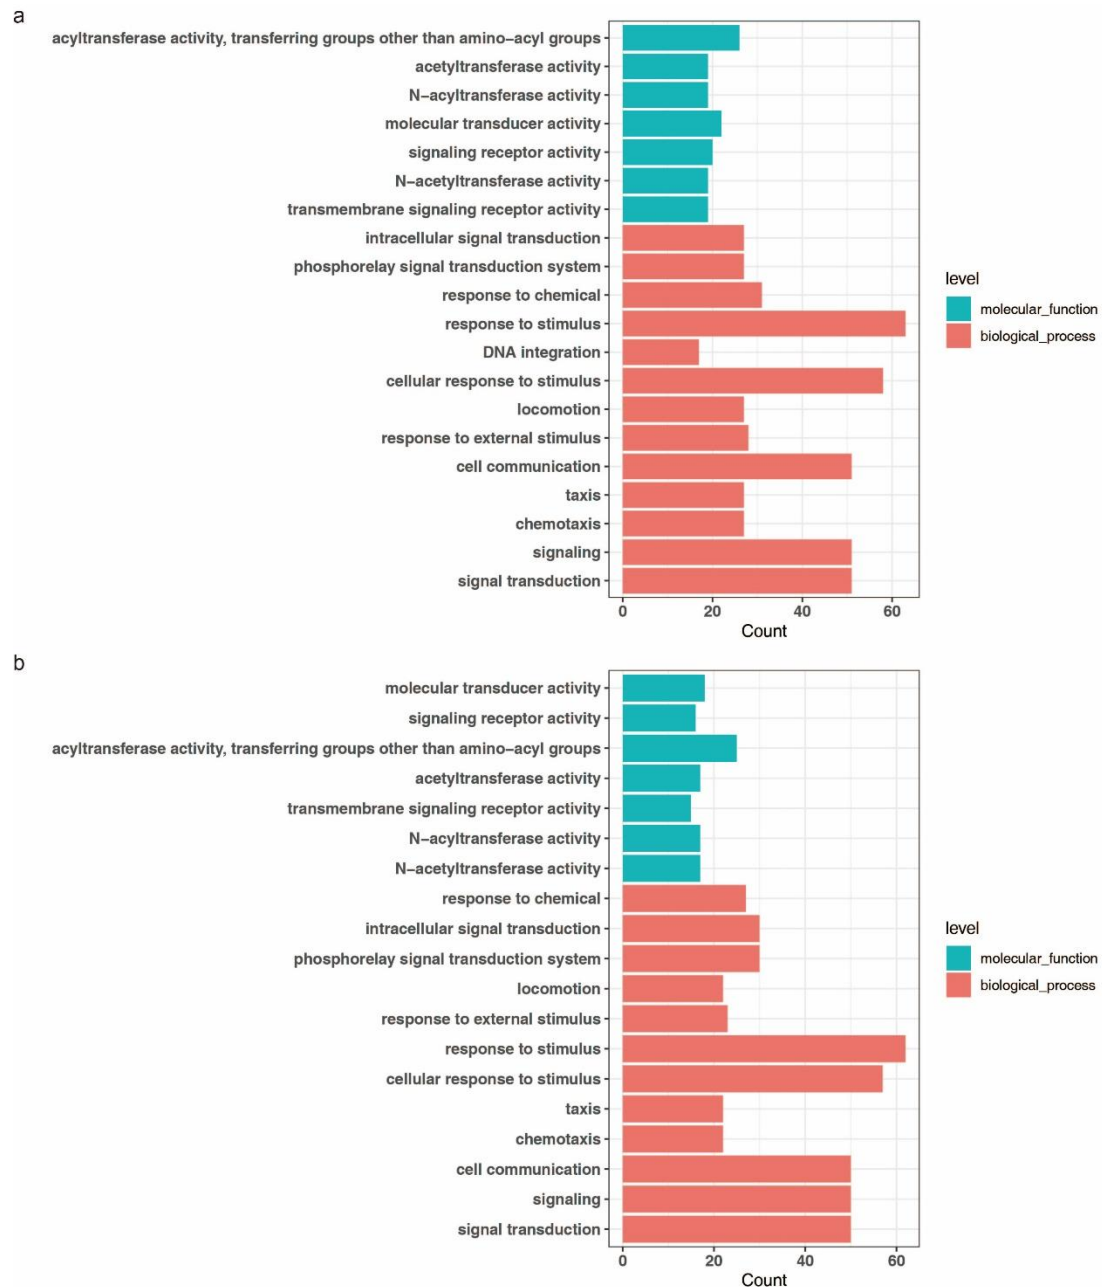

Figure S2: Bar plot GO enrichment analysis. Each bar in the figure represents a GO term, and the number of genes enriched in a term corresponds to the length of the bar. The degree of significance of the enrichment in a term is represented by p.adjust value. a: GO enrichment analysis of potential horizontal transfer genes in HN1; b: GO enrichment analysis of potential horizontal transfer genes in HN2.
