# Supplementary material for: Next Generation Sequencing and Comparative Genomic Analysis Reveal Extreme Plasticity of Two Burkholderia glumae Strains HN1 and HN2
Source: Pathogens. 2022 Oct 30;11(11):1265. doi: 10.3390/pathogens11111265 (PMC9698995; doi:10.3390/pathogens11111265)
Supplement: Supplementary file 1 [file pathogens-11-01265-s001.zip]

Archive with 11 entries (11 files):
- Figure S1 GI go enrich.pdf
- Figure S2 HGT go enrich.pdf
- Table S1  kegg anno  stats.xlsx
- Table S2 COG annotation stats.xlsx
- Table S3  GO annotation stats.xlsx
- Table S4 genome annotation.xlsx
- Table S5 genomic island.xlsx
- Table s6 hgt info.xlsx
- Table S7 information of 27 strains.xlsx
- Table S8 The annotation of genes located in recombined regions of ATCC 33617.xlsx
- Table S9 The annotation  of single copy genes under positive selection.xlsx
