# Supplementary material for: Next Generation Sequencing and Comparative Genomic Analysis Reveal Extreme Plasticity of Two Burkholderia glumae Strains HN1 and HN2
Source: Pathogens. 2022 Oct 30;11(11):1265. doi: 10.3390/pathogens11111265 (PMC9698995; doi:10.3390/pathogens11111265)
Supplement: Supplementary file 1 [file pathogens-11-01265-s001.zip › Table S1 kegg anno stats.xlsx]

## Sheet: Sheet1
KEGG annotation statistics of Burkholderia glumae strains HN1 and HN2
KEGG term2	HN1 Gene number	HN2 Gene number
Circulatory system	4	4
Immune system	8	9
Metabolism of other amino acids	93	94
Excretory system	3	3
Endocrine and metabolic disease	23	23
Environmental adaptation	21	21
Not included in regular maps	1	1
Cell growth and death	30	29
Membrane transport	252	246
Nervous system	3	4
Glycan biosynthesis and metabolism	64	66
Infectious disease: bacterial	28	32
Endocrine system	31	31
Infectious disease: viral	4	4
Nucleotide metabolism	83	83
Cellular community - prokaryotes	213	201
Cancer: overview	31	32
Energy metabolism	180	181
Infectious disease: parasitic	3	3
Cardiovascular disease	27	28
Cell motility	110	105
Transcription	5	5
Lipid metabolism	109	105
Metabolism of terpenoids and polyketides	44	45
Drug resistance: antimicrobial	36	35
Neurodegenerative disease	16	15
Cancer: specific types	12	13
Folding, sorting and degradation	58	56
Transport and catabolism	18	17
Development and regeneration	1	1
Amino acid metabolism	303	302
Xenobiotics biodegradation and metabolism	100	102
Carbohydrate metabolism	316	316
Digestive system	5	5
Metabolism of cofactors and vitamins	223	220
Signal transduction	184	180
Replication and repair	53	53
Translation	88	86
Drug resistance: antineoplastic	16	17
Biosynthesis of other secondary metabolites	70	65
Aging	18	19
Immune disease	1	1
