# Supplementary material for: Next Generation Sequencing and Comparative Genomic Analysis Reveal Extreme Plasticity of Two Burkholderia glumae Strains HN1 and HN2
Source: Pathogens. 2022 Oct 30;11(11):1265. doi: 10.3390/pathogens11111265 (PMC9698995; doi:10.3390/pathogens11111265)
Supplement: Supplementary file 1 [file pathogens-11-01265-s001.zip › Table S2 COG annotation stats.xlsx]

## Sheet: cog_class_stats
Cog annotation statistics of Burkholderia glumae strains HN1 and HN2
Cog Category	Cog description	HN1 gene number	HN1 percent	HN2 gene number	HN2 percent
D	Cell cycle control, cell division, chromosome partitioning	49	0.962294	50	0.991473
N	Cell motility	141	2.76905	140	2.77613
S	Function unknown	987	19.3833	936	18.5604
B	Chromatin structure and dynamics	1	0.0196386	1	0.0198295
O	Posttranslational modification, protein turnover, chaperones	137	2.69049	139	2.7563
G	Carbohydrate transport and metabolism	293	5.75412	297	5.88935
L	Replication, recombination and repair	246	4.83111	254	5.03668
M	Cell wall/membrane/envelope biogenesis	347	6.81461	353	6.9998
J	Translation, ribosomal structure and biogenesis	197	3.86881	193	3.82709
P	Inorganic ion transport and metabolism	318	6.24509	322	6.38509
Q	Secondary metabolites biosynthesis, transport and catabolism	159	3.12255	150	2.97442
C	Energy production and conversion	362	7.10919	362	7.17827
H	Coenzyme transport and metabolism	220	4.3205	221	4.38231
E	Amino acid transport and metabolism	419	8.22859	422	8.36803
F	Nucleotide transport and metabolism	134	2.63158	128	2.53817
I	Lipid transport and metabolism	197	3.86881	189	3.74777
T	Signal transduction mechanisms	243	4.77219	242	4.79873
K	Transcription	469	9.21053	456	9.04224
V	Defense mechanisms	57	1.1194	61	1.2096
W	Extracellular structures	3	0.0589159	4	0.0793179
U	Intracellular trafficking, secretion, and vesicular transport	113	2.21917	122	2.41919
Z	Cytoskeleton			1	0.0198295
