# Supplementary material for: Next Generation Sequencing and Comparative Genomic Analysis Reveal Extreme Plasticity of Two Burkholderia glumae Strains HN1 and HN2
Source: Pathogens. 2022 Oct 30;11(11):1265. doi: 10.3390/pathogens11111265 (PMC9698995; doi:10.3390/pathogens11111265)
Supplement: Supplementary file 1 [file pathogens-11-01265-s001.zip › Table S3 GO annotation stats.xlsx]

## Sheet: Sheet1
GO annotation statistics of Burkholderia glumae strains HN1 and HN2
GOid	Description	Class	HN1 gene number	HN2 gene number
GO:0044419	biological process involved in interspecies interaction between organisms	biological_process	8	4
GO:0065007	biological regulation	biological_process	593	582
GO:0015976	carbon utilization	biological_process	3	3
GO:0009987	cellular process	biological_process	2376	2341
GO:0098754	detoxification	biological_process	30	29
GO:0032502	developmental process	biological_process	33	33
GO:0051179	localization	biological_process	609	612
GO:0040011	locomotion	biological_process	85	79
GO:0008152	metabolic process	biological_process	1983	1947
GO:0019740	nitrogen utilization	biological_process	4	4
GO:0000003	reproduction	biological_process	11	11
GO:0022414	reproductive process	biological_process	11	11
GO:0050896	response to stimulus	biological_process	322	320
GO:0023052	signaling	biological_process	181	180
GO:0016032	viral process	biological_process	4	2
GO:0110165	cellular anatomical entity	cellular_component	1765	1765
GO:0032991	protein-containing complex	cellular_component	167	167
GO:0140657	ATP-dependent activity	molecular_function	128	121
GO:0016209	antioxidant activity	molecular_function	25	24
GO:0005488	binding	molecular_function	1539	1508
GO:0003824	catalytic activity	molecular_function	2263	2244
GO:0003774	cytoskeletal motor activity	molecular_function	8	8
GO:0140104	molecular carrier activity	molecular_function	4	4
GO:0098772	molecular function regulator activity	molecular_function	8	8
GO:0060089	molecular transducer activity	molecular_function	66	61
GO:0140299	small molecule sensor activity	molecular_function	52	56
GO:0005198	structural molecule activity	molecular_function	55	54
GO:0090729	toxin activity	molecular_function	2	2
GO:0140110	transcription regulator activity	molecular_function	232	225
GO:0045182	translation regulator activity	molecular_function	23	21
GO:0005215	transporter activity	molecular_function	414	416
