# Supplementary material for: Next Generation Sequencing and Comparative Genomic Analysis Reveal Extreme Plasticity of Two Burkholderia glumae Strains HN1 and HN2
Source: Pathogens. 2022 Oct 30;11(11):1265. doi: 10.3390/pathogens11111265 (PMC9698995; doi:10.3390/pathogens11111265)
Supplement: Supplementary file 1 [file pathogens-11-01265-s001.zip › Table S4 genome annotation.xlsx]

## Sheet: HN1_anno
Genome annotation of Burkholderia glumae strains HN1
Chr	Source	Source_info	Gene	Start	End	Strand	Pseduo	Type	Product	#GO	GO IDs	GO Names	eggNOG_OGs	COG_category	COG Description	KO id	KO description	EC	Pathway name	KEGG term2 name	KEGG term1 name	Pfam accession	Pfam description	CAZyme by HMMER	CAZyme by eCAMI	CAZyme by DIAMOND	CAZyme of Tools	VFID	VF_Name	VFcategory	PHI Protein ID	PHI Mutant Phenotype	Toxoflavin related gene
NZ_CP052867	chromosome	chromosome:1	HJC54_RS12720	3	2595	-	Y	CDS	pyruvate dehydrogenase (acetyl-transferring), homodimeric type
NZ_CP052867	chromosome	chromosome:1	HJC54_RS12725	2773	3225	+	Y	CDS	MarR family winged helix-turn-helix transcriptional regulator
NZ_CP052867	chromosome	chromosome:1	HJC54_RS12730	3255	4060	-	Y	CDS	inositol-phosphate phosphatase
NZ_CP052867	chromosome	chromosome:1	HJC54_RS12735	4135	4392	-	Y	CDS	Rieske (2Fe-2S) protein
NZ_CP052867	chromosome	chromosome:1	HJC54_RS12740	4563	5372	-	Y	CDS	iron-containing redox enzyme family protein
NZ_CP052867	chromosome	chromosome:1	HJC54_RS12745	5389	6192	-	Y	CDS	dihydrodipicolinate synthase family protein
NZ_CP052867	chromosome	chromosome:1	HJC54_RS12750	6181	6685	-	N	CDS	hypothetical protein				2E7IG@1|root,3320U@2|Bacteria,1NY86@1224|Proteobacteria	-	-							PF19689	Family of unknown function (DUF6190)
NZ_CP052867	chromosome	chromosome:1	HJC54_RS12755	6689	7877	-	Y	CDS	aminotransferase class I/II-fold pyridoxal phosphate-dependent enzyme
NZ_CP052867	chromosome	chromosome:1	HJC54_RS12760	8332	8794	-	Y	CDS	cupin domain-containing protein
NZ_CP052867	chromosome	chromosome:1	HJC54_RS12765	8824	9858	-	Y	CDS	aromatic ring-hydroxylating dioxygenase subunit alpha
NZ_CP052867	chromosome	chromosome:1	HJC54_RS12770	11352	12076	+	Y	CDS	LuxR family transcriptional regulator
NZ_CP052867	chromosome	chromosome:1	HJC54_RS12775	12101	13211	-	Y	CDS	pyruvate dehydrogenase
NZ_CP052867	chromosome	chromosome:1	HJC54_RS12780	13290	13916	-	Y	CDS	glutathione S-transferase N-terminal domain-containing protein
NZ_CP052867	chromosome	chromosome:1	HJC54_RS12785	14274	14826	+	N	CDS	peptidoglycan domain-containing protein				COG3926@1|root,COG3926@2|Bacteria,1MVXW@1224|Proteobacteria,2VRGU@28216|Betaproteobacteria,1K5ME@119060|Burkholderiaceae	S	Predicted Peptidoglycan domain							PF05838	Glycosyl hydrolase 108	GH108(9-92)	-	-	1
NZ_CP052867	chromosome	chromosome:1	HJC54_RS12785	14274	14826	+	N	CDS	peptidoglycan domain-containing protein				COG3926@1|root,COG3926@2|Bacteria,1MVXW@1224|Proteobacteria,2VRGU@28216|Betaproteobacteria,1K5ME@119060|Burkholderiaceae	S	Predicted Peptidoglycan domain							PF09374	Predicted Peptidoglycan domain	GH108(9-92)	-	-	1
NZ_CP052867	chromosome	chromosome:1	HJC54_RS12790	14822	15420	+	Y	CDS	hypothetical protein
NZ_CP052867	chromosome	chromosome:1	HJC54_RS12795	15816	17682	-	Y	CDS	ferrous iron transporter B
NZ_CP052867	chromosome	chromosome:1	HJC54_RS12805	18161	18974	-	Y	CDS	IS5 family transposase
NZ_CP052867	chromosome	chromosome:1	HJC54_RS12810	19060	19785	-	Y	CDS	GGDEF domain-containing protein
NZ_CP052867	chromosome	chromosome:1	HJC54_RS12815	19794	20180	-	Y	CDS	DUF1987 domain-containing protein
NZ_CP052867	chromosome	chromosome:1	HJC54_RS12820	20202	20766	-	N	CDS	SiaB family protein kinase				2DBQT@1|root,2ZAGN@2|Bacteria,1RKZ3@1224|Proteobacteria,2VNUF@28216|Betaproteobacteria,1K45V@119060|Burkholderiaceae	-	-							PF19788	Family of unknown function (DUF6272)
NZ_CP052867	chromosome	chromosome:1	HJC54_RS12825	20778	21893	-	Y	CDS	SpoIIE family protein phosphatase
NZ_CP052867	chromosome	chromosome:1	HJC54_RS12830	23127	26876	+	Y	CDS	response regulator
NZ_CP052867	chromosome	chromosome:1	HJC54_RS12835	26998	27316	-	N	CDS	hypothetical protein
NZ_CP052867	chromosome	chromosome:1	HJC54_RS12840	27650	29189	+	Y	CDS	class I SAM-dependent methyltransferase
NZ_CP052867	chromosome	chromosome:1	HJC54_RS12845	29348	30859	+	Y	CDS	MFS transporter
NZ_CP052867	chromosome	chromosome:1	HJC54_RS12850	31089	32286	+	N	CDS	cyclopropane fatty acyl phospholipid synthase	4	P:GO:0008610; P:GO:0032259; F:GO:0008168; F:GO:0016740	P:lipid biosynthetic process; P:methylation; F:methyltransferase activity; F:transferase activity	COG2230@1|root,COG2230@2|Bacteria,1MX3U@1224|Proteobacteria,2VIPR@28216|Betaproteobacteria,1K25F@119060|Burkholderiaceae	M	Mycolic acid cyclopropane synthetase	K00574	cfa; cyclopropane-fatty-acyl-phospholipid synthase	[EC:2.1.1.79]	Enzymes with EC numbers	Unclassified: metabolism	Not Included in Pathway or Brite	PF02353	Mycolic acid cyclopropane synthetase
NZ_CP052867	chromosome	chromosome:1	HJC54_RS12855	32326	33874	-	N	CDS	glycosyltransferase family 2 protein	3	F:GO:0016740; C:GO:0016020; C:GO:0016021	F:transferase activity; C:membrane; C:integral component of membrane	COG1215@1|root,COG1215@2|Bacteria,1R86K@1224|Proteobacteria,2VHW6@28216|Betaproteobacteria,1K4S0@119060|Burkholderiaceae	M	Pfam Glycosyl transferase family 2							PF13632	Glycosyl transferase family group 2	GT2(223-421)	-	GT2	2
NZ_CP052867	chromosome	chromosome:1	HJC54_RS12860	33870	34476	-	N	CDS	cytochrome b	5	P:GO:0022904; F:GO:0009055; C:GO:0005886; C:GO:0016020; C:GO:0016021	P:respiratory electron transport chain; F:electron transfer activity; C:plasma membrane; C:membrane; C:integral component of membrane	COG3038@1|root,COG3038@2|Bacteria,1RF1F@1224|Proteobacteria,2VTRU@28216|Betaproteobacteria,1K4SE@119060|Burkholderiaceae	C	Prokaryotic cytochrome b561							PF01292	Prokaryotic cytochrome b561
NZ_CP052867	chromosome	chromosome:1	HJC54_RS12865	34774	35350	-	Y	CDS	GNAT family N-acetyltransferase
NZ_CP052867	chromosome	chromosome:1	HJC54_RS12870	35447	35855	-	N	CDS	PRC-barrel domain-containing protein				COG1873@1|root,COG1873@2|Bacteria,1QTWZ@1224|Proteobacteria,2VT3J@28216|Betaproteobacteria,1K7KH@119060|Burkholderiaceae	S	PFAM PRC-barrel domain protein							PF05239	PRC-barrel domain
NZ_CP052867	chromosome	chromosome:1	HJC54_RS12875	36760	37987	+	N	CDS	Ku protein	6	P:GO:0006281; P:GO:0006303; P:GO:0006310; P:GO:0006974; F:GO:0003677; F:GO:0003690	P:DNA repair; P:double-strand break repair via nonhomologous end joining; P:DNA recombination; P:cellular response to DNA damage stimulus; F:DNA binding; F:double-stranded DNA binding	COG1273@1|root,COG1273@2|Bacteria,1N4UX@1224|Proteobacteria,2VJE3@28216|Betaproteobacteria,1K1AW@119060|Burkholderiaceae	L	With LigD forms a non-homologous end joining (NHEJ) DNA repair enzyme, which repairs dsDNA breaks with reduced fidelity. Binds linear dsDNA with 5'- and 3'- overhangs but not closed circular dsDNA nor ssDNA. Recruits and stimulates the ligase activity of LigD	K10979	ku; DNA end-binding protein Ku		Non-homologous end-joining	Replication and repair	Genetic Information Processing	PF02735	Ku70/Ku80 beta-barrel domain
NZ_CP052867	chromosome	chromosome:1	HJC54_RS12880	38006	40724	+	N	CDS	DNA ligase D	17	P:GO:0006266; P:GO:0006281; P:GO:0006310; P:GO:0008152; P:GO:0071897; P:GO:0090305; F:GO:0003677; F:GO:0003824; F:GO:0003887; F:GO:0003910; F:GO:0004518; F:GO:0004527; F:GO:0005524; F:GO:0016740; F:GO:0016779; F:GO:0016787; F:GO:0016874	P:DNA ligation; P:DNA repair; P:DNA recombination; P:metabolic process; P:DNA biosynthetic process; P:nucleic acid phosphodiester bond hydrolysis; F:DNA binding; F:catalytic activity; F:DNA-directed DNA polymerase activity; F:DNA ligase (ATP) activity; F:nuclease activity; F:exonuclease activity; F:ATP binding; F:transferase activity; F:nucleotidyltransferase activity; F:hydrolase activity; F:lig…	COG1793@1|root,COG3285@1|root,COG1793@2|Bacteria,COG3285@2|Bacteria,1MVWY@1224|Proteobacteria,2VIAB@28216|Betaproteobacteria,1K06D@119060|Burkholderiaceae	L	DNA ligase	K01971	ligD; bifunctional non-homologous end joining protein LigD	[EC:6.5.1.1]	Non-homologous end-joining	Replication and repair	Genetic Information Processing	PF13298	DNA polymerase Ligase (LigD)
NZ_CP052867	chromosome	chromosome:1	HJC54_RS12880	38006	40724	+	N	CDS	DNA ligase D	17	P:GO:0006266; P:GO:0006281; P:GO:0006310; P:GO:0008152; P:GO:0071897; P:GO:0090305; F:GO:0003677; F:GO:0003824; F:GO:0003887; F:GO:0003910; F:GO:0004518; F:GO:0004527; F:GO:0005524; F:GO:0016740; F:GO:0016779; F:GO:0016787; F:GO:0016874	P:DNA ligation; P:DNA repair; P:DNA recombination; P:metabolic process; P:DNA biosynthetic process; P:nucleic acid phosphodiester bond hydrolysis; F:DNA binding; F:catalytic activity; F:DNA-directed DNA polymerase activity; F:DNA ligase (ATP) activity; F:nuclease activity; F:exonuclease activity; F:ATP binding; F:transferase activity; F:nucleotidyltransferase activity; F:hydrolase activity; F:lig…	COG1793@1|root,COG3285@1|root,COG1793@2|Bacteria,COG3285@2|Bacteria,1MVWY@1224|Proteobacteria,2VIAB@28216|Betaproteobacteria,1K06D@119060|Burkholderiaceae	L	DNA ligase	K01971	ligD; bifunctional non-homologous end joining protein LigD	[EC:6.5.1.1]	Non-homologous end-joining	Replication and repair	Genetic Information Processing	PF01068	ATP dependent DNA ligase domain
NZ_CP052867	chromosome	chromosome:1	HJC54_RS12880	38006	40724	+	N	CDS	DNA ligase D	17	P:GO:0006266; P:GO:0006281; P:GO:0006310; P:GO:0008152; P:GO:0071897; P:GO:0090305; F:GO:0003677; F:GO:0003824; F:GO:0003887; F:GO:0003910; F:GO:0004518; F:GO:0004527; F:GO:0005524; F:GO:0016740; F:GO:0016779; F:GO:0016787; F:GO:0016874	P:DNA ligation; P:DNA repair; P:DNA recombination; P:metabolic process; P:DNA biosynthetic process; P:nucleic acid phosphodiester bond hydrolysis; F:DNA binding; F:catalytic activity; F:DNA-directed DNA polymerase activity; F:DNA ligase (ATP) activity; F:nuclease activity; F:exonuclease activity; F:ATP binding; F:transferase activity; F:nucleotidyltransferase activity; F:hydrolase activity; F:lig…	COG1793@1|root,COG3285@1|root,COG1793@2|Bacteria,COG3285@2|Bacteria,1MVWY@1224|Proteobacteria,2VIAB@28216|Betaproteobacteria,1K06D@119060|Burkholderiaceae	L	DNA ligase	K01971	ligD; bifunctional non-homologous end joining protein LigD	[EC:6.5.1.1]	Non-homologous end-joining	Replication and repair	Genetic Information Processing	PF04679	ATP dependent DNA ligase C terminal region
NZ_CP052867	chromosome	chromosome:1	HJC54_RS12885	40820	41432	+	N	CDS	TetR/AcrR family transcriptional regulator	1	F:GO:0003677	F:DNA binding	COG1309@1|root,COG1309@2|Bacteria,1RFAP@1224|Proteobacteria,2VS64@28216|Betaproteobacteria,1KHCC@119060|Burkholderiaceae	K	Bacterial regulatory proteins, tetR family							PF00440	Bacterial regulatory proteins, tetR family
NZ_CP052867	chromosome	chromosome:1	HJC54_RS12890	41741	42125	+	N	CDS	VOC family protein	1	F:GO:0051213	F:dioxygenase activity	COG0346@1|root,COG0346@2|Bacteria,1NKC6@1224|Proteobacteria,2W1AP@28216|Betaproteobacteria,1K7PP@119060|Burkholderiaceae	E	Glyoxalase/Bleomycin resistance protein/Dioxygenase superfamily							PF00903	Glyoxalase/Bleomycin resistance protein/Dioxygenase superfamily
NZ_CP052867	chromosome	chromosome:1	HJC54_RS12895	42248	42914	+	N	CDS	class I SAM-dependent methyltransferase	4	P:GO:0032259; F:GO:0008168; F:GO:0008171; F:GO:0016740	P:methylation; F:methyltransferase activity; F:O-methyltransferase activity; F:transferase activity	COG4122@1|root,COG4122@2|Bacteria,1N57D@1224|Proteobacteria,2VWQI@28216|Betaproteobacteria,1K5RC@119060|Burkholderiaceae	S	O-methyltransferase							PF13578	Methyltransferase domain
NZ_CP052867	chromosome	chromosome:1	HJC54_RS12900	42967	43834	-	N	CDS	glutathione-dependent disulfide-bond oxidoreductase	3	P:GO:0006749; F:GO:0016491; F:GO:0016740	P:glutathione metabolic process; F:oxidoreductase activity; F:transferase activity	COG0625@1|root,COG0625@2|Bacteria,1MUN3@1224|Proteobacteria,2VHJD@28216|Betaproteobacteria,1KFE5@119060|Burkholderiaceae	O	Glutathione S-transferase, C-terminal domain	K11209	yghU, yfcG; GSH-dependent disulfide-bond oxidoreductase	[EC:1.8.4.-]	Enzymes with EC numbers	Unclassified: metabolism	Not Included in Pathway or Brite	PF13410	Glutathione S-transferase, C-terminal domain
NZ_CP052867	chromosome	chromosome:1	HJC54_RS12900	42967	43834	-	N	CDS	glutathione-dependent disulfide-bond oxidoreductase	3	P:GO:0006749; F:GO:0016491; F:GO:0016740	P:glutathione metabolic process; F:oxidoreductase activity; F:transferase activity	COG0625@1|root,COG0625@2|Bacteria,1MUN3@1224|Proteobacteria,2VHJD@28216|Betaproteobacteria,1KFE5@119060|Burkholderiaceae	O	Glutathione S-transferase, C-terminal domain	K11209	yghU, yfcG; GSH-dependent disulfide-bond oxidoreductase	[EC:1.8.4.-]	Enzymes with EC numbers	Unclassified: metabolism	Not Included in Pathway or Brite	PF02798	Glutathione S-transferase, N-terminal domain
NZ_CP052867	chromosome	chromosome:1	HJC54_RS12905	44241	45255	+	N	CDS	NAD(P)-dependent alcohol dehydrogenase	1	F:GO:0016491	F:oxidoreductase activity	COG0604@1|root,COG0604@2|Bacteria,1MXUX@1224|Proteobacteria,2VHPT@28216|Betaproteobacteria,1K07F@119060|Burkholderiaceae	C	alcohol dehydrogenase							PF00107	Zinc-binding dehydrogenase
NZ_CP052867	chromosome	chromosome:1	HJC54_RS12905	44241	45255	+	N	CDS	NAD(P)-dependent alcohol dehydrogenase	1	F:GO:0016491	F:oxidoreductase activity	COG0604@1|root,COG0604@2|Bacteria,1MXUX@1224|Proteobacteria,2VHPT@28216|Betaproteobacteria,1K07F@119060|Burkholderiaceae	C	alcohol dehydrogenase							PF08240	Alcohol dehydrogenase GroES-like domain
NZ_CP052867	chromosome	chromosome:1	HJC54_RS12910	45312	46824	-	N	CDS	CoA-acylating methylmalonate-semialdehyde dehydrogenase	3	F:GO:0004491; F:GO:0016491; F:GO:0016620	F:methylmalonate-semialdehyde dehydrogenase (acylating) activity; F:oxidoreductase activity; F:oxidoreductase activity, acting on the aldehyde or oxo group of donors, NAD or NADP as acceptor	COG1012@1|root,COG1012@2|Bacteria,1MUHV@1224|Proteobacteria,2VI0N@28216|Betaproteobacteria,1K0AQ@119060|Burkholderiaceae	C	methylmalonate-semialdehyde dehydrogenase	K00140	mmsA, iolA, ALDH6A1; malonate-semialdehyde dehydrogenase (acetylating) / methylmalonate-semialdehyde dehydrogenase	[EC:1.2.1.18 1.2.1.27]	Propanoate metabolism	Carbohydrate metabolism	Metabolism	PF00171	Aldehyde dehydrogenase family	-	1.2.1.-	-	1
NZ_CP052867	chromosome	chromosome:1	HJC54_RS12910	45312	46824	-	N	CDS	CoA-acylating methylmalonate-semialdehyde dehydrogenase	3	F:GO:0004491; F:GO:0016491; F:GO:0016620	F:methylmalonate-semialdehyde dehydrogenase (acylating) activity; F:oxidoreductase activity; F:oxidoreductase activity, acting on the aldehyde or oxo group of donors, NAD or NADP as acceptor	COG1012@1|root,COG1012@2|Bacteria,1MUHV@1224|Proteobacteria,2VI0N@28216|Betaproteobacteria,1K0AQ@119060|Burkholderiaceae	C	methylmalonate-semialdehyde dehydrogenase	K00140	mmsA, iolA, ALDH6A1; malonate-semialdehyde dehydrogenase (acetylating) / methylmalonate-semialdehyde dehydrogenase	[EC:1.2.1.18 1.2.1.27]	Inositol phosphate metabolism	Carbohydrate metabolism	Metabolism	PF00171	Aldehyde dehydrogenase family	-	1.2.1.-	-	1
NZ_CP052867	chromosome	chromosome:1	HJC54_RS12910	45312	46824	-	N	CDS	CoA-acylating methylmalonate-semialdehyde dehydrogenase	3	F:GO:0004491; F:GO:0016491; F:GO:0016620	F:methylmalonate-semialdehyde dehydrogenase (acylating) activity; F:oxidoreductase activity; F:oxidoreductase activity, acting on the aldehyde or oxo group of donors, NAD or NADP as acceptor	COG1012@1|root,COG1012@2|Bacteria,1MUHV@1224|Proteobacteria,2VI0N@28216|Betaproteobacteria,1K0AQ@119060|Burkholderiaceae	C	methylmalonate-semialdehyde dehydrogenase	K00140	mmsA, iolA, ALDH6A1; malonate-semialdehyde dehydrogenase (acetylating) / methylmalonate-semialdehyde dehydrogenase	[EC:1.2.1.18 1.2.1.27]	Valine, leucine and isoleucine degradation	Amino acid metabolism	Metabolism	PF00171	Aldehyde dehydrogenase family	-	1.2.1.-	-	1
NZ_CP052867	chromosome	chromosome:1	HJC54_RS12910	45312	46824	-	N	CDS	CoA-acylating methylmalonate-semialdehyde dehydrogenase	3	F:GO:0004491; F:GO:0016491; F:GO:0016620	F:methylmalonate-semialdehyde dehydrogenase (acylating) activity; F:oxidoreductase activity; F:oxidoreductase activity, acting on the aldehyde or oxo group of donors, NAD or NADP as acceptor	COG1012@1|root,COG1012@2|Bacteria,1MUHV@1224|Proteobacteria,2VI0N@28216|Betaproteobacteria,1K0AQ@119060|Burkholderiaceae	C	methylmalonate-semialdehyde dehydrogenase	K00140	mmsA, iolA, ALDH6A1; malonate-semialdehyde dehydrogenase (acetylating) / methylmalonate-semialdehyde dehydrogenase	[EC:1.2.1.18 1.2.1.27]	beta-Alanine metabolism	Metabolism of other amino acids	Metabolism	PF00171	Aldehyde dehydrogenase family	-	1.2.1.-	-	1
NZ_CP052867	chromosome	chromosome:1	HJC54_RS12915	46942	47899	+	N	CDS	LysR family transcriptional regulator	2	P:GO:0006355; F:GO:0003700	P:regulation of transcription, DNA-templated; F:DNA-binding transcription factor activity	COG0583@1|root,COG0583@2|Bacteria,1R5GV@1224|Proteobacteria,2VHEG@28216|Betaproteobacteria,1K2Q9@119060|Burkholderiaceae	K	Transcriptional regulator							PF03466	LysR substrate binding domain
NZ_CP052867	chromosome	chromosome:1	HJC54_RS12915	46942	47899	+	N	CDS	LysR family transcriptional regulator	2	P:GO:0006355; F:GO:0003700	P:regulation of transcription, DNA-templated; F:DNA-binding transcription factor activity	COG0583@1|root,COG0583@2|Bacteria,1R5GV@1224|Proteobacteria,2VHEG@28216|Betaproteobacteria,1K2Q9@119060|Burkholderiaceae	K	Transcriptional regulator							PF00126	Bacterial regulatory helix-turn-helix protein, lysR family
NZ_CP052867	chromosome	chromosome:1	HJC54_RS12925	51103	52009	+	N	CDS	LysR family transcriptional regulator	2	P:GO:0006355; F:GO:0003700	P:regulation of transcription, DNA-templated; F:DNA-binding transcription factor activity	COG0583@1|root,COG0583@2|Bacteria,1QBK8@1224|Proteobacteria,2VKBC@28216|Betaproteobacteria,1K1ZT@119060|Burkholderiaceae	K	transcriptional Regulator, LysR family							PF03466	LysR substrate binding domain
NZ_CP052867	chromosome	chromosome:1	HJC54_RS12925	51103	52009	+	N	CDS	LysR family transcriptional regulator	2	P:GO:0006355; F:GO:0003700	P:regulation of transcription, DNA-templated; F:DNA-binding transcription factor activity	COG0583@1|root,COG0583@2|Bacteria,1QBK8@1224|Proteobacteria,2VKBC@28216|Betaproteobacteria,1K1ZT@119060|Burkholderiaceae	K	transcriptional Regulator, LysR family							PF00126	Bacterial regulatory helix-turn-helix protein, lysR family
NZ_CP052867	chromosome	chromosome:1	HJC54_RS12935	53780	54905	+	N	CDS	NAD(P)/FAD-dependent oxidoreductase	1	F:GO:0016491	F:oxidoreductase activity	COG0579@1|root,COG0579@2|Bacteria,1N0QB@1224|Proteobacteria,2VIKG@28216|Betaproteobacteria,1K411@119060|Burkholderiaceae	S	Fad dependent oxidoreductase							PF01266	FAD dependent oxidoreductase
NZ_CP052867	chromosome	chromosome:1	HJC54_RS12940	55348	55783	-	N	CDS	DUF2471 family protein				2AH1S@1|root,317AW@2|Bacteria,1PYKM@1224|Proteobacteria,2WDSN@28216|Betaproteobacteria,1KAXE@119060|Burkholderiaceae	S	Protein of unknown function (DUF2471)							PF10616	Protein of unknown function (DUF2471)
NZ_CP052867	chromosome	chromosome:1	HJC54_RS12945	56209	56890	+	N	CDS	flavin reductase family protein	3	F:GO:0004497; F:GO:0010181; F:GO:0016646	F:monooxygenase activity; F:FMN binding; F:oxidoreductase activity, acting on the CH-NH group of donors, NAD or NADP as acceptor	COG1853@1|root,COG1853@2|Bacteria,1MUPP@1224|Proteobacteria,2VIPM@28216|Betaproteobacteria,1KFJ3@119060|Burkholderiaceae	S	Flavin reductase like domain							PF01613	Flavin reductase like domain
NZ_CP052867	chromosome	chromosome:1	HJC54_RS12955	57393	58077	-	N	CDS	HAD-IB family hydrolase	1	F:GO:0016787	F:hydrolase activity	COG0560@1|root,COG0560@2|Bacteria,1RA1A@1224|Proteobacteria,2VMGV@28216|Betaproteobacteria,1K3HM@119060|Burkholderiaceae	E	HAD-superfamily hydrolase, subfamily IB (PSPase-like)							PF12710	haloacid dehalogenase-like hydrolase
NZ_CP052867	chromosome	chromosome:1	HJC54_RS12965	59471	60047	-	N	CDS	flavin reductase family protein	2	F:GO:0010181; F:GO:0016646	F:FMN binding; F:oxidoreductase activity, acting on the CH-NH group of donors, NAD or NADP as acceptor	COG1853@1|root,COG1853@2|Bacteria,1NB1B@1224|Proteobacteria,2VQ0V@28216|Betaproteobacteria,1K574@119060|Burkholderiaceae	S	PFAM flavin reductase domain protein, FMN-binding							PF01613	Flavin reductase like domain
NZ_CP052867	chromosome	chromosome:1	HJC54_RS12970	60294	60627	+	N	CDS	DUF2322 family protein				COG4390@1|root,COG4390@2|Bacteria,1N8RK@1224|Proteobacteria,2VUJW@28216|Betaproteobacteria,1K8C6@119060|Burkholderiaceae	S	Uncharacterized protein conserved in bacteria (DUF2322)							PF10084	Uncharacterized protein conserved in bacteria (DUF2322)
NZ_CP052867	chromosome	chromosome:1	HJC54_RS12975	60707	61448	-	N	CDS	HAD family phosphatase	1	F:GO:0016787	F:hydrolase activity	COG0637@1|root,COG0637@2|Bacteria,1PYYG@1224|Proteobacteria,2WE2N@28216|Betaproteobacteria,1KBH9@119060|Burkholderiaceae	S	HAD-hyrolase-like							PF13419	Haloacid dehalogenase-like hydrolase
NZ_CP052867	chromosome	chromosome:1	HJC54_RS12980	62296	63565	-	N	CDS	DUF2242 domain-containing protein				2BXMH@1|root,32R9I@2|Bacteria,1RER2@1224|Proteobacteria,2VRNC@28216|Betaproteobacteria,1KI5Z@119060|Burkholderiaceae	S	Uncharacterized protein conserved in bacteria (DUF2242)							PF10001	Uncharacterized protein conserved in bacteria (DUF2242)
NZ_CP052867	chromosome	chromosome:1	HJC54_RS12985	63793	64246	-	N	CDS	Hsp20/alpha crystallin family protein				COG0071@1|root,COG0071@2|Bacteria,1NA27@1224|Proteobacteria,2W72M@28216|Betaproteobacteria,1KDMH@119060|Burkholderiaceae	O	Hsp20/alpha crystallin family	K13993	HSP20; HSP20 family protein		Protein processing in endoplasmic reticulum	Folding, sorting and degradation	Genetic Information Processing	PF00011	Hsp20/alpha crystallin family
NZ_CP052867	chromosome	chromosome:1	HJC54_RS12990	64277	64718	-	N	CDS	Hsp20/alpha crystallin family protein				COG0071@1|root,COG0071@2|Bacteria,1PSF3@1224|Proteobacteria,2WA7K@28216|Betaproteobacteria,1KDCC@119060|Burkholderiaceae	O	Hsp20/alpha crystallin family	K13993	HSP20; HSP20 family protein		Protein processing in endoplasmic reticulum	Folding, sorting and degradation	Genetic Information Processing	PF00011	Hsp20/alpha crystallin family
NZ_CP052867	chromosome	chromosome:1	HJC54_RS12995	65354	67220	+	N	CDS	phosphoenolpyruvate carboxykinase (GTP)	13	P:GO:0006094; P:GO:0016310; F:GO:0000166; F:GO:0004611; F:GO:0004613; F:GO:0005525; F:GO:0016301; F:GO:0016829; F:GO:0016831; F:GO:0017076; F:GO:0030145; F:GO:0046872; C:GO:0005737	P:gluconeogenesis; P:phosphorylation; F:nucleotide binding; F:phosphoenolpyruvate carboxykinase activity; F:phosphoenolpyruvate carboxykinase (GTP) activity; F:GTP binding; F:kinase activity; F:lyase activity; F:carboxy-lyase activity; F:purine nucleotide binding; F:manganese ion binding; F:metal ion binding; C:cytoplasm	COG1274@1|root,COG1274@2|Bacteria,1MX3C@1224|Proteobacteria,2VINZ@28216|Betaproteobacteria,1JZXA@119060|Burkholderiaceae	H	Catalyzes the conversion of oxaloacetate (OAA) to phosphoenolpyruvate (PEP), the rate-limiting step in the metabolic pathway that produces glucose from lactate and other precursors derived from the citric acid cycle	K01596	E4.1.1.32, pckA, PCK; phosphoenolpyruvate carboxykinase (GTP)	[EC:4.1.1.32]	Glycolysis / Gluconeogenesis	Carbohydrate metabolism	Metabolism	PF00821	Phosphoenolpyruvate carboxykinase C-terminal P-loop domain	-	4.1.1.-	-	1
NZ_CP052867	chromosome	chromosome:1	HJC54_RS12995	65354	67220	+	N	CDS	phosphoenolpyruvate carboxykinase (GTP)	13	P:GO:0006094; P:GO:0016310; F:GO:0000166; F:GO:0004611; F:GO:0004613; F:GO:0005525; F:GO:0016301; F:GO:0016829; F:GO:0016831; F:GO:0017076; F:GO:0030145; F:GO:0046872; C:GO:0005737	P:gluconeogenesis; P:phosphorylation; F:nucleotide binding; F:phosphoenolpyruvate carboxykinase activity; F:phosphoenolpyruvate carboxykinase (GTP) activity; F:GTP binding; F:kinase activity; F:lyase activity; F:carboxy-lyase activity; F:purine nucleotide binding; F:manganese ion binding; F:metal ion binding; C:cytoplasm	COG1274@1|root,COG1274@2|Bacteria,1MX3C@1224|Proteobacteria,2VINZ@28216|Betaproteobacteria,1JZXA@119060|Burkholderiaceae	H	Catalyzes the conversion of oxaloacetate (OAA) to phosphoenolpyruvate (PEP), the rate-limiting step in the metabolic pathway that produces glucose from lactate and other precursors derived from the citric acid cycle	K01596	E4.1.1.32, pckA, PCK; phosphoenolpyruvate carboxykinase (GTP)	[EC:4.1.1.32]	Glycolysis / Gluconeogenesis	Carbohydrate metabolism	Metabolism	PF17297	Phosphoenolpyruvate carboxykinase N-terminal domain	-	4.1.1.-	-	1
NZ_CP052867	chromosome	chromosome:1	HJC54_RS12995	65354	67220	+	N	CDS	phosphoenolpyruvate carboxykinase (GTP)	13	P:GO:0006094; P:GO:0016310; F:GO:0000166; F:GO:0004611; F:GO:0004613; F:GO:0005525; F:GO:0016301; F:GO:0016829; F:GO:0016831; F:GO:0017076; F:GO:0030145; F:GO:0046872; C:GO:0005737	P:gluconeogenesis; P:phosphorylation; F:nucleotide binding; F:phosphoenolpyruvate carboxykinase activity; F:phosphoenolpyruvate carboxykinase (GTP) activity; F:GTP binding; F:kinase activity; F:lyase activity; F:carboxy-lyase activity; F:purine nucleotide binding; F:manganese ion binding; F:metal ion binding; C:cytoplasm	COG1274@1|root,COG1274@2|Bacteria,1MX3C@1224|Proteobacteria,2VINZ@28216|Betaproteobacteria,1JZXA@119060|Burkholderiaceae	H	Catalyzes the conversion of oxaloacetate (OAA) to phosphoenolpyruvate (PEP), the rate-limiting step in the metabolic pathway that produces glucose from lactate and other precursors derived from the citric acid cycle	K01596	E4.1.1.32, pckA, PCK; phosphoenolpyruvate carboxykinase (GTP)	[EC:4.1.1.32]	Citrate cycle (TCA cycle)	Carbohydrate metabolism	Metabolism	PF00821	Phosphoenolpyruvate carboxykinase C-terminal P-loop domain	-	4.1.1.-	-	1
NZ_CP052867	chromosome	chromosome:1	HJC54_RS12995	65354	67220	+	N	CDS	phosphoenolpyruvate carboxykinase (GTP)	13	P:GO:0006094; P:GO:0016310; F:GO:0000166; F:GO:0004611; F:GO:0004613; F:GO:0005525; F:GO:0016301; F:GO:0016829; F:GO:0016831; F:GO:0017076; F:GO:0030145; F:GO:0046872; C:GO:0005737	P:gluconeogenesis; P:phosphorylation; F:nucleotide binding; F:phosphoenolpyruvate carboxykinase activity; F:phosphoenolpyruvate carboxykinase (GTP) activity; F:GTP binding; F:kinase activity; F:lyase activity; F:carboxy-lyase activity; F:purine nucleotide binding; F:manganese ion binding; F:metal ion binding; C:cytoplasm	COG1274@1|root,COG1274@2|Bacteria,1MX3C@1224|Proteobacteria,2VINZ@28216|Betaproteobacteria,1JZXA@119060|Burkholderiaceae	H	Catalyzes the conversion of oxaloacetate (OAA) to phosphoenolpyruvate (PEP), the rate-limiting step in the metabolic pathway that produces glucose from lactate and other precursors derived from the citric acid cycle	K01596	E4.1.1.32, pckA, PCK; phosphoenolpyruvate carboxykinase (GTP)	[EC:4.1.1.32]	Citrate cycle (TCA cycle)	Carbohydrate metabolism	Metabolism	PF17297	Phosphoenolpyruvate carboxykinase N-terminal domain	-	4.1.1.-	-	1
NZ_CP052867	chromosome	chromosome:1	HJC54_RS12995	65354	67220	+	N	CDS	phosphoenolpyruvate carboxykinase (GTP)	13	P:GO:0006094; P:GO:0016310; F:GO:0000166; F:GO:0004611; F:GO:0004613; F:GO:0005525; F:GO:0016301; F:GO:0016829; F:GO:0016831; F:GO:0017076; F:GO:0030145; F:GO:0046872; C:GO:0005737	P:gluconeogenesis; P:phosphorylation; F:nucleotide binding; F:phosphoenolpyruvate carboxykinase activity; F:phosphoenolpyruvate carboxykinase (GTP) activity; F:GTP binding; F:kinase activity; F:lyase activity; F:carboxy-lyase activity; F:purine nucleotide binding; F:manganese ion binding; F:metal ion binding; C:cytoplasm	COG1274@1|root,COG1274@2|Bacteria,1MX3C@1224|Proteobacteria,2VINZ@28216|Betaproteobacteria,1JZXA@119060|Burkholderiaceae	H	Catalyzes the conversion of oxaloacetate (OAA) to phosphoenolpyruvate (PEP), the rate-limiting step in the metabolic pathway that produces glucose from lactate and other precursors derived from the citric acid cycle	K01596	E4.1.1.32, pckA, PCK; phosphoenolpyruvate carboxykinase (GTP)	[EC:4.1.1.32]	Pyruvate metabolism	Carbohydrate metabolism	Metabolism	PF00821	Phosphoenolpyruvate carboxykinase C-terminal P-loop domain	-	4.1.1.-	-	1
NZ_CP052867	chromosome	chromosome:1	HJC54_RS12995	65354	67220	+	N	CDS	phosphoenolpyruvate carboxykinase (GTP)	13	P:GO:0006094; P:GO:0016310; F:GO:0000166; F:GO:0004611; F:GO:0004613; F:GO:0005525; F:GO:0016301; F:GO:0016829; F:GO:0016831; F:GO:0017076; F:GO:0030145; F:GO:0046872; C:GO:0005737	P:gluconeogenesis; P:phosphorylation; F:nucleotide binding; F:phosphoenolpyruvate carboxykinase activity; F:phosphoenolpyruvate carboxykinase (GTP) activity; F:GTP binding; F:kinase activity; F:lyase activity; F:carboxy-lyase activity; F:purine nucleotide binding; F:manganese ion binding; F:metal ion binding; C:cytoplasm	COG1274@1|root,COG1274@2|Bacteria,1MX3C@1224|Proteobacteria,2VINZ@28216|Betaproteobacteria,1JZXA@119060|Burkholderiaceae	H	Catalyzes the conversion of oxaloacetate (OAA) to phosphoenolpyruvate (PEP), the rate-limiting step in the metabolic pathway that produces glucose from lactate and other precursors derived from the citric acid cycle	K01596	E4.1.1.32, pckA, PCK; phosphoenolpyruvate carboxykinase (GTP)	[EC:4.1.1.32]	Pyruvate metabolism	Carbohydrate metabolism	Metabolism	PF17297	Phosphoenolpyruvate carboxykinase N-terminal domain	-	4.1.1.-	-	1
NZ_CP052867	chromosome	chromosome:1	HJC54_RS12995	65354	67220	+	N	CDS	phosphoenolpyruvate carboxykinase (GTP)	13	P:GO:0006094; P:GO:0016310; F:GO:0000166; F:GO:0004611; F:GO:0004613; F:GO:0005525; F:GO:0016301; F:GO:0016829; F:GO:0016831; F:GO:0017076; F:GO:0030145; F:GO:0046872; C:GO:0005737	P:gluconeogenesis; P:phosphorylation; F:nucleotide binding; F:phosphoenolpyruvate carboxykinase activity; F:phosphoenolpyruvate carboxykinase (GTP) activity; F:GTP binding; F:kinase activity; F:lyase activity; F:carboxy-lyase activity; F:purine nucleotide binding; F:manganese ion binding; F:metal ion binding; C:cytoplasm	COG1274@1|root,COG1274@2|Bacteria,1MX3C@1224|Proteobacteria,2VINZ@28216|Betaproteobacteria,1JZXA@119060|Burkholderiaceae	H	Catalyzes the conversion of oxaloacetate (OAA) to phosphoenolpyruvate (PEP), the rate-limiting step in the metabolic pathway that produces glucose from lactate and other precursors derived from the citric acid cycle	K01596	E4.1.1.32, pckA, PCK; phosphoenolpyruvate carboxykinase (GTP)	[EC:4.1.1.32]	FoxO signaling pathway	Signal transduction	Environmental Information Processing	PF00821	Phosphoenolpyruvate carboxykinase C-terminal P-loop domain	-	4.1.1.-	-	1
NZ_CP052867	chromosome	chromosome:1	HJC54_RS12995	65354	67220	+	N	CDS	phosphoenolpyruvate carboxykinase (GTP)	13	P:GO:0006094; P:GO:0016310; F:GO:0000166; F:GO:0004611; F:GO:0004613; F:GO:0005525; F:GO:0016301; F:GO:0016829; F:GO:0016831; F:GO:0017076; F:GO:0030145; F:GO:0046872; C:GO:0005737	P:gluconeogenesis; P:phosphorylation; F:nucleotide binding; F:phosphoenolpyruvate carboxykinase activity; F:phosphoenolpyruvate carboxykinase (GTP) activity; F:GTP binding; F:kinase activity; F:lyase activity; F:carboxy-lyase activity; F:purine nucleotide binding; F:manganese ion binding; F:metal ion binding; C:cytoplasm	COG1274@1|root,COG1274@2|Bacteria,1MX3C@1224|Proteobacteria,2VINZ@28216|Betaproteobacteria,1JZXA@119060|Burkholderiaceae	H	Catalyzes the conversion of oxaloacetate (OAA) to phosphoenolpyruvate (PEP), the rate-limiting step in the metabolic pathway that produces glucose from lactate and other precursors derived from the citric acid cycle	K01596	E4.1.1.32, pckA, PCK; phosphoenolpyruvate carboxykinase (GTP)	[EC:4.1.1.32]	FoxO signaling pathway	Signal transduction	Environmental Information Processing	PF17297	Phosphoenolpyruvate carboxykinase N-terminal domain	-	4.1.1.-	-	1
NZ_CP052867	chromosome	chromosome:1	HJC54_RS12995	65354	67220	+	N	CDS	phosphoenolpyruvate carboxykinase (GTP)	13	P:GO:0006094; P:GO:0016310; F:GO:0000166; F:GO:0004611; F:GO:0004613; F:GO:0005525; F:GO:0016301; F:GO:0016829; F:GO:0016831; F:GO:0017076; F:GO:0030145; F:GO:0046872; C:GO:0005737	P:gluconeogenesis; P:phosphorylation; F:nucleotide binding; F:phosphoenolpyruvate carboxykinase activity; F:phosphoenolpyruvate carboxykinase (GTP) activity; F:GTP binding; F:kinase activity; F:lyase activity; F:carboxy-lyase activity; F:purine nucleotide binding; F:manganese ion binding; F:metal ion binding; C:cytoplasm	COG1274@1|root,COG1274@2|Bacteria,1MX3C@1224|Proteobacteria,2VINZ@28216|Betaproteobacteria,1JZXA@119060|Burkholderiaceae	H	Catalyzes the conversion of oxaloacetate (OAA) to phosphoenolpyruvate (PEP), the rate-limiting step in the metabolic pathway that produces glucose from lactate and other precursors derived from the citric acid cycle	K01596	E4.1.1.32, pckA, PCK; phosphoenolpyruvate carboxykinase (GTP)	[EC:4.1.1.32]	PI3K-Akt signaling pathway	Signal transduction	Environmental Information Processing	PF00821	Phosphoenolpyruvate carboxykinase C-terminal P-loop domain	-	4.1.1.-	-	1
NZ_CP052867	chromosome	chromosome:1	HJC54_RS12995	65354	67220	+	N	CDS	phosphoenolpyruvate carboxykinase (GTP)	13	P:GO:0006094; P:GO:0016310; F:GO:0000166; F:GO:0004611; F:GO:0004613; F:GO:0005525; F:GO:0016301; F:GO:0016829; F:GO:0016831; F:GO:0017076; F:GO:0030145; F:GO:0046872; C:GO:0005737	P:gluconeogenesis; P:phosphorylation; F:nucleotide binding; F:phosphoenolpyruvate carboxykinase activity; F:phosphoenolpyruvate carboxykinase (GTP) activity; F:GTP binding; F:kinase activity; F:lyase activity; F:carboxy-lyase activity; F:purine nucleotide binding; F:manganese ion binding; F:metal ion binding; C:cytoplasm	COG1274@1|root,COG1274@2|Bacteria,1MX3C@1224|Proteobacteria,2VINZ@28216|Betaproteobacteria,1JZXA@119060|Burkholderiaceae	H	Catalyzes the conversion of oxaloacetate (OAA) to phosphoenolpyruvate (PEP), the rate-limiting step in the metabolic pathway that produces glucose from lactate and other precursors derived from the citric acid cycle	K01596	E4.1.1.32, pckA, PCK; phosphoenolpyruvate carboxykinase (GTP)	[EC:4.1.1.32]	PI3K-Akt signaling pathway	Signal transduction	Environmental Information Processing	PF17297	Phosphoenolpyruvate carboxykinase N-terminal domain	-	4.1.1.-	-	1
NZ_CP052867	chromosome	chromosome:1	HJC54_RS12995	65354	67220	+	N	CDS	phosphoenolpyruvate carboxykinase (GTP)	13	P:GO:0006094; P:GO:0016310; F:GO:0000166; F:GO:0004611; F:GO:0004613; F:GO:0005525; F:GO:0016301; F:GO:0016829; F:GO:0016831; F:GO:0017076; F:GO:0030145; F:GO:0046872; C:GO:0005737	P:gluconeogenesis; P:phosphorylation; F:nucleotide binding; F:phosphoenolpyruvate carboxykinase activity; F:phosphoenolpyruvate carboxykinase (GTP) activity; F:GTP binding; F:kinase activity; F:lyase activity; F:carboxy-lyase activity; F:purine nucleotide binding; F:manganese ion binding; F:metal ion binding; C:cytoplasm	COG1274@1|root,COG1274@2|Bacteria,1MX3C@1224|Proteobacteria,2VINZ@28216|Betaproteobacteria,1JZXA@119060|Burkholderiaceae	H	Catalyzes the conversion of oxaloacetate (OAA) to phosphoenolpyruvate (PEP), the rate-limiting step in the metabolic pathway that produces glucose from lactate and other precursors derived from the citric acid cycle	K01596	E4.1.1.32, pckA, PCK; phosphoenolpyruvate carboxykinase (GTP)	[EC:4.1.1.32]	AMPK signaling pathway	Signal transduction	Environmental Information Processing	PF00821	Phosphoenolpyruvate carboxykinase C-terminal P-loop domain	-	4.1.1.-	-	1
NZ_CP052867	chromosome	chromosome:1	HJC54_RS12995	65354	67220	+	N	CDS	phosphoenolpyruvate carboxykinase (GTP)	13	P:GO:0006094; P:GO:0016310; F:GO:0000166; F:GO:0004611; F:GO:0004613; F:GO:0005525; F:GO:0016301; F:GO:0016829; F:GO:0016831; F:GO:0017076; F:GO:0030145; F:GO:0046872; C:GO:0005737	P:gluconeogenesis; P:phosphorylation; F:nucleotide binding; F:phosphoenolpyruvate carboxykinase activity; F:phosphoenolpyruvate carboxykinase (GTP) activity; F:GTP binding; F:kinase activity; F:lyase activity; F:carboxy-lyase activity; F:purine nucleotide binding; F:manganese ion binding; F:metal ion binding; C:cytoplasm	COG1274@1|root,COG1274@2|Bacteria,1MX3C@1224|Proteobacteria,2VINZ@28216|Betaproteobacteria,1JZXA@119060|Burkholderiaceae	H	Catalyzes the conversion of oxaloacetate (OAA) to phosphoenolpyruvate (PEP), the rate-limiting step in the metabolic pathway that produces glucose from lactate and other precursors derived from the citric acid cycle	K01596	E4.1.1.32, pckA, PCK; phosphoenolpyruvate carboxykinase (GTP)	[EC:4.1.1.32]	AMPK signaling pathway	Signal transduction	Environmental Information Processing	PF17297	Phosphoenolpyruvate carboxykinase N-terminal domain	-	4.1.1.-	-	1
NZ_CP052867	chromosome	chromosome:1	HJC54_RS12995	65354	67220	+	N	CDS	phosphoenolpyruvate carboxykinase (GTP)	13	P:GO:0006094; P:GO:0016310; F:GO:0000166; F:GO:0004611; F:GO:0004613; F:GO:0005525; F:GO:0016301; F:GO:0016829; F:GO:0016831; F:GO:0017076; F:GO:0030145; F:GO:0046872; C:GO:0005737	P:gluconeogenesis; P:phosphorylation; F:nucleotide binding; F:phosphoenolpyruvate carboxykinase activity; F:phosphoenolpyruvate carboxykinase (GTP) activity; F:GTP binding; F:kinase activity; F:lyase activity; F:carboxy-lyase activity; F:purine nucleotide binding; F:manganese ion binding; F:metal ion binding; C:cytoplasm	COG1274@1|root,COG1274@2|Bacteria,1MX3C@1224|Proteobacteria,2VINZ@28216|Betaproteobacteria,1JZXA@119060|Burkholderiaceae	H	Catalyzes the conversion of oxaloacetate (OAA) to phosphoenolpyruvate (PEP), the rate-limiting step in the metabolic pathway that produces glucose from lactate and other precursors derived from the citric acid cycle	K01596	E4.1.1.32, pckA, PCK; phosphoenolpyruvate carboxykinase (GTP)	[EC:4.1.1.32]	Insulin signaling pathway	Endocrine system	Organismal Systems	PF00821	Phosphoenolpyruvate carboxykinase C-terminal P-loop domain	-	4.1.1.-	-	1
NZ_CP052867	chromosome	chromosome:1	HJC54_RS12995	65354	67220	+	N	CDS	phosphoenolpyruvate carboxykinase (GTP)	13	P:GO:0006094; P:GO:0016310; F:GO:0000166; F:GO:0004611; F:GO:0004613; F:GO:0005525; F:GO:0016301; F:GO:0016829; F:GO:0016831; F:GO:0017076; F:GO:0030145; F:GO:0046872; C:GO:0005737	P:gluconeogenesis; P:phosphorylation; F:nucleotide binding; F:phosphoenolpyruvate carboxykinase activity; F:phosphoenolpyruvate carboxykinase (GTP) activity; F:GTP binding; F:kinase activity; F:lyase activity; F:carboxy-lyase activity; F:purine nucleotide binding; F:manganese ion binding; F:metal ion binding; C:cytoplasm	COG1274@1|root,COG1274@2|Bacteria,1MX3C@1224|Proteobacteria,2VINZ@28216|Betaproteobacteria,1JZXA@119060|Burkholderiaceae	H	Catalyzes the conversion of oxaloacetate (OAA) to phosphoenolpyruvate (PEP), the rate-limiting step in the metabolic pathway that produces glucose from lactate and other precursors derived from the citric acid cycle	K01596	E4.1.1.32, pckA, PCK; phosphoenolpyruvate carboxykinase (GTP)	[EC:4.1.1.32]	Insulin signaling pathway	Endocrine system	Organismal Systems	PF17297	Phosphoenolpyruvate carboxykinase N-terminal domain	-	4.1.1.-	-	1
NZ_CP052867	chromosome	chromosome:1	HJC54_RS12995	65354	67220	+	N	CDS	phosphoenolpyruvate carboxykinase (GTP)	13	P:GO:0006094; P:GO:0016310; F:GO:0000166; F:GO:0004611; F:GO:0004613; F:GO:0005525; F:GO:0016301; F:GO:0016829; F:GO:0016831; F:GO:0017076; F:GO:0030145; F:GO:0046872; C:GO:0005737	P:gluconeogenesis; P:phosphorylation; F:nucleotide binding; F:phosphoenolpyruvate carboxykinase activity; F:phosphoenolpyruvate carboxykinase (GTP) activity; F:GTP binding; F:kinase activity; F:lyase activity; F:carboxy-lyase activity; F:purine nucleotide binding; F:manganese ion binding; F:metal ion binding; C:cytoplasm	COG1274@1|root,COG1274@2|Bacteria,1MX3C@1224|Proteobacteria,2VINZ@28216|Betaproteobacteria,1JZXA@119060|Burkholderiaceae	H	Catalyzes the conversion of oxaloacetate (OAA) to phosphoenolpyruvate (PEP), the rate-limiting step in the metabolic pathway that produces glucose from lactate and other precursors derived from the citric acid cycle	K01596	E4.1.1.32, pckA, PCK; phosphoenolpyruvate carboxykinase (GTP)	[EC:4.1.1.32]	Glucagon signaling pathway	Endocrine system	Organismal Systems	PF00821	Phosphoenolpyruvate carboxykinase C-terminal P-loop domain	-	4.1.1.-	-	1
NZ_CP052867	chromosome	chromosome:1	HJC54_RS12995	65354	67220	+	N	CDS	phosphoenolpyruvate carboxykinase (GTP)	13	P:GO:0006094; P:GO:0016310; F:GO:0000166; F:GO:0004611; F:GO:0004613; F:GO:0005525; F:GO:0016301; F:GO:0016829; F:GO:0016831; F:GO:0017076; F:GO:0030145; F:GO:0046872; C:GO:0005737	P:gluconeogenesis; P:phosphorylation; F:nucleotide binding; F:phosphoenolpyruvate carboxykinase activity; F:phosphoenolpyruvate carboxykinase (GTP) activity; F:GTP binding; F:kinase activity; F:lyase activity; F:carboxy-lyase activity; F:purine nucleotide binding; F:manganese ion binding; F:metal ion binding; C:cytoplasm	COG1274@1|root,COG1274@2|Bacteria,1MX3C@1224|Proteobacteria,2VINZ@28216|Betaproteobacteria,1JZXA@119060|Burkholderiaceae	H	Catalyzes the conversion of oxaloacetate (OAA) to phosphoenolpyruvate (PEP), the rate-limiting step in the metabolic pathway that produces glucose from lactate and other precursors derived from the citric acid cycle	K01596	E4.1.1.32, pckA, PCK; phosphoenolpyruvate carboxykinase (GTP)	[EC:4.1.1.32]	Glucagon signaling pathway	Endocrine system	Organismal Systems	PF17297	Phosphoenolpyruvate carboxykinase N-terminal domain	-	4.1.1.-	-	1
NZ_CP052867	chromosome	chromosome:1	HJC54_RS12995	65354	67220	+	N	CDS	phosphoenolpyruvate carboxykinase (GTP)	13	P:GO:0006094; P:GO:0016310; F:GO:0000166; F:GO:0004611; F:GO:0004613; F:GO:0005525; F:GO:0016301; F:GO:0016829; F:GO:0016831; F:GO:0017076; F:GO:0030145; F:GO:0046872; C:GO:0005737	P:gluconeogenesis; P:phosphorylation; F:nucleotide binding; F:phosphoenolpyruvate carboxykinase activity; F:phosphoenolpyruvate carboxykinase (GTP) activity; F:GTP binding; F:kinase activity; F:lyase activity; F:carboxy-lyase activity; F:purine nucleotide binding; F:manganese ion binding; F:metal ion binding; C:cytoplasm	COG1274@1|root,COG1274@2|Bacteria,1MX3C@1224|Proteobacteria,2VINZ@28216|Betaproteobacteria,1JZXA@119060|Burkholderiaceae	H	Catalyzes the conversion of oxaloacetate (OAA) to phosphoenolpyruvate (PEP), the rate-limiting step in the metabolic pathway that produces glucose from lactate and other precursors derived from the citric acid cycle	K01596	E4.1.1.32, pckA, PCK; phosphoenolpyruvate carboxykinase (GTP)	[EC:4.1.1.32]	Adipocytokine signaling pathway	Endocrine system	Organismal Systems	PF00821	Phosphoenolpyruvate carboxykinase C-terminal P-loop domain	-	4.1.1.-	-	1
NZ_CP052867	chromosome	chromosome:1	HJC54_RS12995	65354	67220	+	N	CDS	phosphoenolpyruvate carboxykinase (GTP)	13	P:GO:0006094; P:GO:0016310; F:GO:0000166; F:GO:0004611; F:GO:0004613; F:GO:0005525; F:GO:0016301; F:GO:0016829; F:GO:0016831; F:GO:0017076; F:GO:0030145; F:GO:0046872; C:GO:0005737	P:gluconeogenesis; P:phosphorylation; F:nucleotide binding; F:phosphoenolpyruvate carboxykinase activity; F:phosphoenolpyruvate carboxykinase (GTP) activity; F:GTP binding; F:kinase activity; F:lyase activity; F:carboxy-lyase activity; F:purine nucleotide binding; F:manganese ion binding; F:metal ion binding; C:cytoplasm	COG1274@1|root,COG1274@2|Bacteria,1MX3C@1224|Proteobacteria,2VINZ@28216|Betaproteobacteria,1JZXA@119060|Burkholderiaceae	H	Catalyzes the conversion of oxaloacetate (OAA) to phosphoenolpyruvate (PEP), the rate-limiting step in the metabolic pathway that produces glucose from lactate and other precursors derived from the citric acid cycle	K01596	E4.1.1.32, pckA, PCK; phosphoenolpyruvate carboxykinase (GTP)	[EC:4.1.1.32]	Adipocytokine signaling pathway	Endocrine system	Organismal Systems	PF17297	Phosphoenolpyruvate carboxykinase N-terminal domain	-	4.1.1.-	-	1
NZ_CP052867	chromosome	chromosome:1	HJC54_RS12995	65354	67220	+	N	CDS	phosphoenolpyruvate carboxykinase (GTP)	13	P:GO:0006094; P:GO:0016310; F:GO:0000166; F:GO:0004611; F:GO:0004613; F:GO:0005525; F:GO:0016301; F:GO:0016829; F:GO:0016831; F:GO:0017076; F:GO:0030145; F:GO:0046872; C:GO:0005737	P:gluconeogenesis; P:phosphorylation; F:nucleotide binding; F:phosphoenolpyruvate carboxykinase activity; F:phosphoenolpyruvate carboxykinase (GTP) activity; F:GTP binding; F:kinase activity; F:lyase activity; F:carboxy-lyase activity; F:purine nucleotide binding; F:manganese ion binding; F:metal ion binding; C:cytoplasm	COG1274@1|root,COG1274@2|Bacteria,1MX3C@1224|Proteobacteria,2VINZ@28216|Betaproteobacteria,1JZXA@119060|Burkholderiaceae	H	Catalyzes the conversion of oxaloacetate (OAA) to phosphoenolpyruvate (PEP), the rate-limiting step in the metabolic pathway that produces glucose from lactate and other precursors derived from the citric acid cycle	K01596	E4.1.1.32, pckA, PCK; phosphoenolpyruvate carboxykinase (GTP)	[EC:4.1.1.32]	PPAR signaling pathway	Endocrine system	Organismal Systems	PF00821	Phosphoenolpyruvate carboxykinase C-terminal P-loop domain	-	4.1.1.-	-	1
NZ_CP052867	chromosome	chromosome:1	HJC54_RS12995	65354	67220	+	N	CDS	phosphoenolpyruvate carboxykinase (GTP)	13	P:GO:0006094; P:GO:0016310; F:GO:0000166; F:GO:0004611; F:GO:0004613; F:GO:0005525; F:GO:0016301; F:GO:0016829; F:GO:0016831; F:GO:0017076; F:GO:0030145; F:GO:0046872; C:GO:0005737	P:gluconeogenesis; P:phosphorylation; F:nucleotide binding; F:phosphoenolpyruvate carboxykinase activity; F:phosphoenolpyruvate carboxykinase (GTP) activity; F:GTP binding; F:kinase activity; F:lyase activity; F:carboxy-lyase activity; F:purine nucleotide binding; F:manganese ion binding; F:metal ion binding; C:cytoplasm	COG1274@1|root,COG1274@2|Bacteria,1MX3C@1224|Proteobacteria,2VINZ@28216|Betaproteobacteria,1JZXA@119060|Burkholderiaceae	H	Catalyzes the conversion of oxaloacetate (OAA) to phosphoenolpyruvate (PEP), the rate-limiting step in the metabolic pathway that produces glucose from lactate and other precursors derived from the citric acid cycle	K01596	E4.1.1.32, pckA, PCK; phosphoenolpyruvate carboxykinase (GTP)	[EC:4.1.1.32]	PPAR signaling pathway	Endocrine system	Organismal Systems	PF17297	Phosphoenolpyruvate carboxykinase N-terminal domain	-	4.1.1.-	-	1
NZ_CP052867	chromosome	chromosome:1	HJC54_RS12995	65354	67220	+	N	CDS	phosphoenolpyruvate carboxykinase (GTP)	13	P:GO:0006094; P:GO:0016310; F:GO:0000166; F:GO:0004611; F:GO:0004613; F:GO:0005525; F:GO:0016301; F:GO:0016829; F:GO:0016831; F:GO:0017076; F:GO:0030145; F:GO:0046872; C:GO:0005737	P:gluconeogenesis; P:phosphorylation; F:nucleotide binding; F:phosphoenolpyruvate carboxykinase activity; F:phosphoenolpyruvate carboxykinase (GTP) activity; F:GTP binding; F:kinase activity; F:lyase activity; F:carboxy-lyase activity; F:purine nucleotide binding; F:manganese ion binding; F:metal ion binding; C:cytoplasm	COG1274@1|root,COG1274@2|Bacteria,1MX3C@1224|Proteobacteria,2VINZ@28216|Betaproteobacteria,1JZXA@119060|Burkholderiaceae	H	Catalyzes the conversion of oxaloacetate (OAA) to phosphoenolpyruvate (PEP), the rate-limiting step in the metabolic pathway that produces glucose from lactate and other precursors derived from the citric acid cycle	K01596	E4.1.1.32, pckA, PCK; phosphoenolpyruvate carboxykinase (GTP)	[EC:4.1.1.32]	Proximal tubule bicarbonate reclamation	Excretory system	Organismal Systems	PF00821	Phosphoenolpyruvate carboxykinase C-terminal P-loop domain	-	4.1.1.-	-	1
NZ_CP052867	chromosome	chromosome:1	HJC54_RS12995	65354	67220	+	N	CDS	phosphoenolpyruvate carboxykinase (GTP)	13	P:GO:0006094; P:GO:0016310; F:GO:0000166; F:GO:0004611; F:GO:0004613; F:GO:0005525; F:GO:0016301; F:GO:0016829; F:GO:0016831; F:GO:0017076; F:GO:0030145; F:GO:0046872; C:GO:0005737	P:gluconeogenesis; P:phosphorylation; F:nucleotide binding; F:phosphoenolpyruvate carboxykinase activity; F:phosphoenolpyruvate carboxykinase (GTP) activity; F:GTP binding; F:kinase activity; F:lyase activity; F:carboxy-lyase activity; F:purine nucleotide binding; F:manganese ion binding; F:metal ion binding; C:cytoplasm	COG1274@1|root,COG1274@2|Bacteria,1MX3C@1224|Proteobacteria,2VINZ@28216|Betaproteobacteria,1JZXA@119060|Burkholderiaceae	H	Catalyzes the conversion of oxaloacetate (OAA) to phosphoenolpyruvate (PEP), the rate-limiting step in the metabolic pathway that produces glucose from lactate and other precursors derived from the citric acid cycle	K01596	E4.1.1.32, pckA, PCK; phosphoenolpyruvate carboxykinase (GTP)	[EC:4.1.1.32]	Proximal tubule bicarbonate reclamation	Excretory system	Organismal Systems	PF17297	Phosphoenolpyruvate carboxykinase N-terminal domain	-	4.1.1.-	-	1
NZ_CP052867	chromosome	chromosome:1	HJC54_RS12995	65354	67220	+	N	CDS	phosphoenolpyruvate carboxykinase (GTP)	13	P:GO:0006094; P:GO:0016310; F:GO:0000166; F:GO:0004611; F:GO:0004613; F:GO:0005525; F:GO:0016301; F:GO:0016829; F:GO:0016831; F:GO:0017076; F:GO:0030145; F:GO:0046872; C:GO:0005737	P:gluconeogenesis; P:phosphorylation; F:nucleotide binding; F:phosphoenolpyruvate carboxykinase activity; F:phosphoenolpyruvate carboxykinase (GTP) activity; F:GTP binding; F:kinase activity; F:lyase activity; F:carboxy-lyase activity; F:purine nucleotide binding; F:manganese ion binding; F:metal ion binding; C:cytoplasm	COG1274@1|root,COG1274@2|Bacteria,1MX3C@1224|Proteobacteria,2VINZ@28216|Betaproteobacteria,1JZXA@119060|Burkholderiaceae	H	Catalyzes the conversion of oxaloacetate (OAA) to phosphoenolpyruvate (PEP), the rate-limiting step in the metabolic pathway that produces glucose from lactate and other precursors derived from the citric acid cycle	K01596	E4.1.1.32, pckA, PCK; phosphoenolpyruvate carboxykinase (GTP)	[EC:4.1.1.32]	Insulin resistance	Endocrine and metabolic disease	Human Diseases	PF00821	Phosphoenolpyruvate carboxykinase C-terminal P-loop domain	-	4.1.1.-	-	1
NZ_CP052867	chromosome	chromosome:1	HJC54_RS12995	65354	67220	+	N	CDS	phosphoenolpyruvate carboxykinase (GTP)	13	P:GO:0006094; P:GO:0016310; F:GO:0000166; F:GO:0004611; F:GO:0004613; F:GO:0005525; F:GO:0016301; F:GO:0016829; F:GO:0016831; F:GO:0017076; F:GO:0030145; F:GO:0046872; C:GO:0005737	P:gluconeogenesis; P:phosphorylation; F:nucleotide binding; F:phosphoenolpyruvate carboxykinase activity; F:phosphoenolpyruvate carboxykinase (GTP) activity; F:GTP binding; F:kinase activity; F:lyase activity; F:carboxy-lyase activity; F:purine nucleotide binding; F:manganese ion binding; F:metal ion binding; C:cytoplasm	COG1274@1|root,COG1274@2|Bacteria,1MX3C@1224|Proteobacteria,2VINZ@28216|Betaproteobacteria,1JZXA@119060|Burkholderiaceae	H	Catalyzes the conversion of oxaloacetate (OAA) to phosphoenolpyruvate (PEP), the rate-limiting step in the metabolic pathway that produces glucose from lactate and other precursors derived from the citric acid cycle	K01596	E4.1.1.32, pckA, PCK; phosphoenolpyruvate carboxykinase (GTP)	[EC:4.1.1.32]	Insulin resistance	Endocrine and metabolic disease	Human Diseases	PF17297	Phosphoenolpyruvate carboxykinase N-terminal domain	-	4.1.1.-	-	1
NZ_CP052867	chromosome	chromosome:1	HJC54_RS13000	67415	68336	+	N	CDS	3-hydroxyacyl-CoA dehydrogenase	7	P:GO:0006631; P:GO:0044248; P:GO:1901575; F:GO:0008691; F:GO:0016491; F:GO:0016616; F:GO:0070403	P:fatty acid metabolic process; P:cellular catabolic process; P:organic substance catabolic process; F:3-hydroxybutyryl-CoA dehydrogenase activity; F:oxidoreductase activity; F:oxidoreductase activity, acting on the CH-OH group of donors, NAD or NADP as acceptor; F:NAD+ binding	COG1250@1|root,COG1250@2|Bacteria,1MV8M@1224|Proteobacteria,2VJ64@28216|Betaproteobacteria,1K25J@119060|Burkholderiaceae	I	3-hydroxyacyl-coa dehydrogenase							PF00725	3-hydroxyacyl-CoA dehydrogenase, C-terminal domain
NZ_CP052867	chromosome	chromosome:1	HJC54_RS13000	67415	68336	+	N	CDS	3-hydroxyacyl-CoA dehydrogenase	7	P:GO:0006631; P:GO:0044248; P:GO:1901575; F:GO:0008691; F:GO:0016491; F:GO:0016616; F:GO:0070403	P:fatty acid metabolic process; P:cellular catabolic process; P:organic substance catabolic process; F:3-hydroxybutyryl-CoA dehydrogenase activity; F:oxidoreductase activity; F:oxidoreductase activity, acting on the CH-OH group of donors, NAD or NADP as acceptor; F:NAD+ binding	COG1250@1|root,COG1250@2|Bacteria,1MV8M@1224|Proteobacteria,2VJ64@28216|Betaproteobacteria,1K25J@119060|Burkholderiaceae	I	3-hydroxyacyl-coa dehydrogenase							PF02737	3-hydroxyacyl-CoA dehydrogenase, NAD binding domain
NZ_CP052867	chromosome	chromosome:1	HJC54_RS13005	68474	69323	-	N	CDS	LysR family transcriptional regulator	2	P:GO:0006355; F:GO:0003700	P:regulation of transcription, DNA-templated; F:DNA-binding transcription factor activity	COG0583@1|root,COG0583@2|Bacteria,1R4NT@1224|Proteobacteria,2VM90@28216|Betaproteobacteria,1K4ZF@119060|Burkholderiaceae	K	transcriptional Regulator, LysR family							PF03466	LysR substrate binding domain
NZ_CP052867	chromosome	chromosome:1	HJC54_RS13005	68474	69323	-	N	CDS	LysR family transcriptional regulator	2	P:GO:0006355; F:GO:0003700	P:regulation of transcription, DNA-templated; F:DNA-binding transcription factor activity	COG0583@1|root,COG0583@2|Bacteria,1R4NT@1224|Proteobacteria,2VM90@28216|Betaproteobacteria,1K4ZF@119060|Burkholderiaceae	K	transcriptional Regulator, LysR family							PF00126	Bacterial regulatory helix-turn-helix protein, lysR family
NZ_CP052867	chromosome	chromosome:1	HJC54_RS13020	71633	72548	+	N	CDS	biotin-independent malonate decarboxylase subunit beta	6	P:GO:0006633; P:GO:0044262; F:GO:0003989; F:GO:0016831; C:GO:0005737; C:GO:0009317	P:fatty acid biosynthetic process; P:cellular carbohydrate metabolic process; F:acetyl-CoA carboxylase activity; F:carboxy-lyase activity; C:cytoplasm; C:acetyl-CoA carboxylase complex	COG4799@1|root,COG4799@2|Bacteria,1PDNC@1224|Proteobacteria,2VIGW@28216|Betaproteobacteria,1KFJ9@119060|Burkholderiaceae	I	Malonate decarboxylase beta subunit	K13932	mdcD; malonate decarboxylase beta subunit	[EC:4.1.1.87]	Enzymes with EC numbers	Unclassified: metabolism	Not Included in Pathway or Brite	PF01039	Carboxyl transferase domain
NZ_CP052867	chromosome	chromosome:1	HJC54_RS13025	72544	73261	+	N	CDS	malonate decarboxylase subunit gamma	3	P:GO:0044262; F:GO:0016829; C:GO:0005737	P:cellular carbohydrate metabolic process; F:lyase activity; C:cytoplasm	COG4799@1|root,COG4799@2|Bacteria,1NRN3@1224|Proteobacteria,2VJ5W@28216|Betaproteobacteria,1KIE4@119060|Burkholderiaceae	I	malonate decarboxylase gamma subunit	K13933	mdcE; malonate decarboxylase gamma subunit	[EC:4.1.1.87]	Enzymes with EC numbers	Unclassified: metabolism	Not Included in Pathway or Brite	PF06833	Malonate decarboxylase gamma subunit (MdcE)
NZ_CP052867	chromosome	chromosome:1	HJC54_RS13030	73235	73964	+	N	CDS	malonate decarboxylase holo-[acyl-carrier-protein] synthase	2	F:GO:0016740; F:GO:0016779	F:transferase activity; F:nucleotidyltransferase activity	2BCNC@1|root,32T8X@2|Bacteria,1N3A6@1224|Proteobacteria,2VUWQ@28216|Betaproteobacteria,1K8IS@119060|Burkholderiaceae	S	malonate decarboxylase	K13934	mdcG; phosphoribosyl-dephospho-CoA transferase	[EC:2.7.7.66]	Enzymes with EC numbers	Unclassified: metabolism	Not Included in Pathway or Brite	PF10620	Phosphoribosyl-dephospho-CoA transferase MdcG
NZ_CP052867	chromosome	chromosome:1	HJC54_RS13035	73960	74956	+	N	CDS	triphosphoribosyl-dephospho-CoA synthase	5	P:GO:0016310; F:GO:0000166; F:GO:0005524; F:GO:0016740; F:GO:0046917	P:phosphorylation; F:nucleotide binding; F:ATP binding; F:transferase activity; F:triphosphoribosyl-dephospho-CoA synthase activity	COG1767@1|root,COG1767@2|Bacteria,1NB3R@1224|Proteobacteria,2VJZ4@28216|Betaproteobacteria,1KFZA@119060|Burkholderiaceae	H	Involved in the formation of 2-(5''-phosphoribosyl)-3'- dephosphocoenzyme-A, the prosthetic group of the acyl-carrier protein of the malonate decarboxylase	K13930	mdcB; triphosphoribosyl-dephospho-CoA synthase	[EC:2.4.2.52]	Enzymes with EC numbers	Unclassified: metabolism	Not Included in Pathway or Brite	PF01874	ATP:dephospho-CoA triphosphoribosyl transferase	-	2.4.2.-	-	1
NZ_CP052867	chromosome	chromosome:1	HJC54_RS13040	74952	75894	+	N	CDS	acyltransferase domain-containing protein	1	F:GO:0016740	F:transferase activity	COG0331@1|root,COG0331@2|Bacteria,1PPIC@1224|Proteobacteria,2VTJ1@28216|Betaproteobacteria,1K6C8@119060|Burkholderiaceae	I	Acyl transferase domain	K00645	fabD, MCAT, MCT1;	[acyl-carrier-protein] S-malonyltransferase	Fatty acid biosynthesis	Lipid metabolism	Metabolism	PF00698	Acyl transferase domain
NZ_CP052867	chromosome	chromosome:1	HJC54_RS13040	74952	75894	+	N	CDS	acyltransferase domain-containing protein	1	F:GO:0016740	F:transferase activity	COG0331@1|root,COG0331@2|Bacteria,1PPIC@1224|Proteobacteria,2VTJ1@28216|Betaproteobacteria,1K6C8@119060|Burkholderiaceae	I	Acyl transferase domain	K00645	fabD, MCAT, MCT1;	[acyl-carrier-protein] S-malonyltransferase	Prodigiosin biosynthesis	Biosynthesis of other secondary metabolites	Metabolism	PF00698	Acyl transferase domain
NZ_CP052867	chromosome	chromosome:1	HJC54_RS13045	76030	76591	+	N	CDS	hypothetical protein				COG1502@1|root,COG1502@2|Bacteria,1RG9Z@1224|Proteobacteria,2W3EI@28216|Betaproteobacteria,1K97C@119060|Burkholderiaceae	I	PLD-like domain
NZ_CP052867	chromosome	chromosome:1	HJC54_RS13050	76879	77728	+	N	CDS	alpha/beta hydrolase	1	F:GO:0016787	F:hydrolase activity	COG4757@1|root,COG4757@2|Bacteria,1Q1V6@1224|Proteobacteria,2VKQ9@28216|Betaproteobacteria,1K7Z6@119060|Burkholderiaceae	S	Serine aminopeptidase, S33							PF12146	Serine aminopeptidase, S33
NZ_CP052867	chromosome	chromosome:1	HJC54_RS13055	77807	78437	+	N	CDS	glutathione S-transferase	2	P:GO:0006749; F:GO:0016740	P:glutathione metabolic process; F:transferase activity	COG0625@1|root,COG0625@2|Bacteria,1NUET@1224|Proteobacteria,2VKA7@28216|Betaproteobacteria,1K4M5@119060|Burkholderiaceae	O	Glutathione S-transferase							PF13417	Glutathione S-transferase, N-terminal domain
NZ_CP052867	chromosome	chromosome:1	HJC54_RS13055	77807	78437	+	N	CDS	glutathione S-transferase	2	P:GO:0006749; F:GO:0016740	P:glutathione metabolic process; F:transferase activity	COG0625@1|root,COG0625@2|Bacteria,1NUET@1224|Proteobacteria,2VKA7@28216|Betaproteobacteria,1K4M5@119060|Burkholderiaceae	O	Glutathione S-transferase							PF00043	Glutathione S-transferase, C-terminal domain
NZ_CP052867	chromosome	chromosome:1	HJC54_RS13060	78604	78805	+	N	CDS	hypothetical protein				2AGG4@1|root,316NG@2|Bacteria,1PXTC@1224|Proteobacteria,2WD51@28216|Betaproteobacteria,1K9DF@119060|Burkholderiaceae	-	-
NZ_CP052867	chromosome	chromosome:1	HJC54_RS13075	81468	82191	-	N	CDS	DNA polymerase III subunit epsilon	12	P:GO:0006260; P:GO:0071897; P:GO:0090305; F:GO:0003676; F:GO:0003677; F:GO:0003887; F:GO:0004518; F:GO:0004527; F:GO:0016740; F:GO:0016779; F:GO:0016787; F:GO:0046872	P:DNA replication; P:DNA biosynthetic process; P:nucleic acid phosphodiester bond hydrolysis; F:nucleic acid binding; F:DNA binding; F:DNA-directed DNA polymerase activity; F:nuclease activity; F:exonuclease activity; F:transferase activity; F:nucleotidyltransferase activity; F:hydrolase activity; F:metal ion binding	COG0847@1|root,COG0847@2|Bacteria,1MV8Z@1224|Proteobacteria,2VH1Z@28216|Betaproteobacteria,1K069@119060|Burkholderiaceae	L	DNA polymerase III is a complex, multichain enzyme responsible for most of the replicative synthesis in bacteria. The epsilon subunit contain the editing function and is a proofreading 3'-5' exonuclease	K02342	dnaQ; DNA polymerase III subunit epsilon	[EC:2.7.7.7]	DNA replication	Replication and repair	Genetic Information Processing	PF00929	Exonuclease	-	2.7.7.-	-	1
NZ_CP052867	chromosome	chromosome:1	HJC54_RS13075	81468	82191	-	N	CDS	DNA polymerase III subunit epsilon	12	P:GO:0006260; P:GO:0071897; P:GO:0090305; F:GO:0003676; F:GO:0003677; F:GO:0003887; F:GO:0004518; F:GO:0004527; F:GO:0016740; F:GO:0016779; F:GO:0016787; F:GO:0046872	P:DNA replication; P:DNA biosynthetic process; P:nucleic acid phosphodiester bond hydrolysis; F:nucleic acid binding; F:DNA binding; F:DNA-directed DNA polymerase activity; F:nuclease activity; F:exonuclease activity; F:transferase activity; F:nucleotidyltransferase activity; F:hydrolase activity; F:metal ion binding	COG0847@1|root,COG0847@2|Bacteria,1MV8Z@1224|Proteobacteria,2VH1Z@28216|Betaproteobacteria,1K069@119060|Burkholderiaceae	L	DNA polymerase III is a complex, multichain enzyme responsible for most of the replicative synthesis in bacteria. The epsilon subunit contain the editing function and is a proofreading 3'-5' exonuclease	K02342	dnaQ; DNA polymerase III subunit epsilon	[EC:2.7.7.7]	Mismatch repair	Replication and repair	Genetic Information Processing	PF00929	Exonuclease	-	2.7.7.-	-	1
NZ_CP052867	chromosome	chromosome:1	HJC54_RS13075	81468	82191	-	N	CDS	DNA polymerase III subunit epsilon	12	P:GO:0006260; P:GO:0071897; P:GO:0090305; F:GO:0003676; F:GO:0003677; F:GO:0003887; F:GO:0004518; F:GO:0004527; F:GO:0016740; F:GO:0016779; F:GO:0016787; F:GO:0046872	P:DNA replication; P:DNA biosynthetic process; P:nucleic acid phosphodiester bond hydrolysis; F:nucleic acid binding; F:DNA binding; F:DNA-directed DNA polymerase activity; F:nuclease activity; F:exonuclease activity; F:transferase activity; F:nucleotidyltransferase activity; F:hydrolase activity; F:metal ion binding	COG0847@1|root,COG0847@2|Bacteria,1MV8Z@1224|Proteobacteria,2VH1Z@28216|Betaproteobacteria,1K069@119060|Burkholderiaceae	L	DNA polymerase III is a complex, multichain enzyme responsible for most of the replicative synthesis in bacteria. The epsilon subunit contain the editing function and is a proofreading 3'-5' exonuclease	K02342	dnaQ; DNA polymerase III subunit epsilon	[EC:2.7.7.7]	Homologous recombination	Replication and repair	Genetic Information Processing	PF00929	Exonuclease	-	2.7.7.-	-	1
NZ_CP052867	chromosome	chromosome:1	HJC54_RS13080	82301	82751	-	N	CDS	ribonuclease HI	11	P:GO:0006401; P:GO:0090305; P:GO:0090502; F:GO:0000287; F:GO:0003676; F:GO:0004518; F:GO:0004519; F:GO:0004523; F:GO:0016787; F:GO:0046872; C:GO:0005737	P:RNA catabolic process; P:nucleic acid phosphodiester bond hydrolysis; P:RNA phosphodiester bond hydrolysis, endonucleolytic; F:magnesium ion binding; F:nucleic acid binding; F:nuclease activity; F:endonuclease activity; F:RNA-DNA hybrid ribonuclease activity; F:hydrolase activity; F:metal ion binding; C:cytoplasm	COG0328@1|root,COG0328@2|Bacteria,1RCZ1@1224|Proteobacteria,2VR4W@28216|Betaproteobacteria,1K3S0@119060|Burkholderiaceae	L	Endonuclease that specifically degrades the RNA of RNA- DNA hybrids	K03469	rnhA, RNASEH1; ribonuclease HI	[EC:3.1.26.4]	DNA replication	Replication and repair	Genetic Information Processing	PF00075	RNase H	-	3.1.26.-	-	1
NZ_CP052867	chromosome	chromosome:1	HJC54_RS13085	82747	83560	-	N	CDS	class I SAM-dependent methyltransferase	3	P:GO:0032259; F:GO:0008168; F:GO:0016740	P:methylation; F:methyltransferase activity; F:transferase activity	COG0500@1|root,COG2226@2|Bacteria,1QTWC@1224|Proteobacteria,2VQ89@28216|Betaproteobacteria,1K213@119060|Burkholderiaceae	Q	PFAM Methyltransferase type 11							PF08241	Methyltransferase domain
NZ_CP052867	chromosome	chromosome:1	HJC54_RS13090	83578	84385	+	N	CDS	hydroxyacylglutathione hydrolase	4	P:GO:0019243; F:GO:0004416; F:GO:0016787; F:GO:0046872	P:methylglyoxal catabolic process to D-lactate via S-lactoyl-glutathione; F:hydroxyacylglutathione hydrolase activity; F:hydrolase activity; F:metal ion binding	COG0491@1|root,COG0491@2|Bacteria,1MU8Q@1224|Proteobacteria,2VGZG@28216|Betaproteobacteria,1K3AQ@119060|Burkholderiaceae	S	Thiolesterase that catalyzes the hydrolysis of S-D- lactoyl-glutathione to form glutathione and D-lactic acid	K01069	gloB, gloC, HAGH; hydroxyacylglutathione hydrolase	[EC:3.1.2.6]	Pyruvate metabolism	Carbohydrate metabolism	Metabolism	PF00753	Metallo-beta-lactamase superfamily	-	3.1.2.-	-	1
NZ_CP052867	chromosome	chromosome:1	HJC54_RS13090	83578	84385	+	N	CDS	hydroxyacylglutathione hydrolase	4	P:GO:0019243; F:GO:0004416; F:GO:0016787; F:GO:0046872	P:methylglyoxal catabolic process to D-lactate via S-lactoyl-glutathione; F:hydroxyacylglutathione hydrolase activity; F:hydrolase activity; F:metal ion binding	COG0491@1|root,COG0491@2|Bacteria,1MU8Q@1224|Proteobacteria,2VGZG@28216|Betaproteobacteria,1K3AQ@119060|Burkholderiaceae	S	Thiolesterase that catalyzes the hydrolysis of S-D- lactoyl-glutathione to form glutathione and D-lactic acid	K01069	gloB, gloC, HAGH; hydroxyacylglutathione hydrolase	[EC:3.1.2.6]	Pyruvate metabolism	Carbohydrate metabolism	Metabolism	PF16123	Hydroxyacylglutathione hydrolase C-terminus	-	3.1.2.-	-	1
NZ_CP052867	chromosome	chromosome:1	HJC54_RS13100	86408	87638	+	N	CDS	MFS transporter	4	P:GO:0055085; F:GO:0022857; C:GO:0016020; C:GO:0016021	P:transmembrane transport; F:transmembrane transporter activity; C:membrane; C:integral component of membrane	COG2807@1|root,COG2807@2|Bacteria,1QTXB@1224|Proteobacteria,2WGGN@28216|Betaproteobacteria,1K4V2@119060|Burkholderiaceae	P	Pfam Major Facilitator Superfamily							PF07690	Major Facilitator Superfamily
NZ_CP052867	chromosome	chromosome:1	HJC54_RS13105	88071	89214	+	N	CDS	glutamine-hydrolyzing carbamoyl-phosphate synthase small subunit	10	P:GO:0006207; P:GO:0006221; P:GO:0006526; P:GO:0006541; P:GO:0008652; P:GO:0044205; F:GO:0000166; F:GO:0004088; F:GO:0005524; F:GO:0016874	P:'de novo' pyrimidine nucleobase biosynthetic process; P:pyrimidine nucleotide biosynthetic process; P:arginine biosynthetic process; P:glutamine metabolic process; P:cellular amino acid biosynthetic process; P:'de novo' UMP biosynthetic process; F:nucleotide binding; F:carbamoyl-phosphate synthase (glutamine-hydrolyzing) activity; F:ATP binding; F:ligase activity	COG0505@1|root,COG0505@2|Bacteria,1MUB9@1224|Proteobacteria,2VH9Q@28216|Betaproteobacteria,1K3MB@119060|Burkholderiaceae	F	Belongs to the CarA family	K01956	carA, CPA1; carbamoyl-phosphate synthase small subunit	[EC:6.3.5.5]	Pyrimidine metabolism	Nucleotide metabolism	Metabolism	PF00117	Glutamine amidotransferase class-I	-	6.3.5.-	-	1
NZ_CP052867	chromosome	chromosome:1	HJC54_RS13105	88071	89214	+	N	CDS	glutamine-hydrolyzing carbamoyl-phosphate synthase small subunit	10	P:GO:0006207; P:GO:0006221; P:GO:0006526; P:GO:0006541; P:GO:0008652; P:GO:0044205; F:GO:0000166; F:GO:0004088; F:GO:0005524; F:GO:0016874	P:'de novo' pyrimidine nucleobase biosynthetic process; P:pyrimidine nucleotide biosynthetic process; P:arginine biosynthetic process; P:glutamine metabolic process; P:cellular amino acid biosynthetic process; P:'de novo' UMP biosynthetic process; F:nucleotide binding; F:carbamoyl-phosphate synthase (glutamine-hydrolyzing) activity; F:ATP binding; F:ligase activity	COG0505@1|root,COG0505@2|Bacteria,1MUB9@1224|Proteobacteria,2VH9Q@28216|Betaproteobacteria,1K3MB@119060|Burkholderiaceae	F	Belongs to the CarA family	K01956	carA, CPA1; carbamoyl-phosphate synthase small subunit	[EC:6.3.5.5]	Pyrimidine metabolism	Nucleotide metabolism	Metabolism	PF00988	Carbamoyl-phosphate synthase small chain, CPSase domain	-	6.3.5.-	-	1
NZ_CP052867	chromosome	chromosome:1	HJC54_RS13105	88071	89214	+	N	CDS	glutamine-hydrolyzing carbamoyl-phosphate synthase small subunit	10	P:GO:0006207; P:GO:0006221; P:GO:0006526; P:GO:0006541; P:GO:0008652; P:GO:0044205; F:GO:0000166; F:GO:0004088; F:GO:0005524; F:GO:0016874	P:'de novo' pyrimidine nucleobase biosynthetic process; P:pyrimidine nucleotide biosynthetic process; P:arginine biosynthetic process; P:glutamine metabolic process; P:cellular amino acid biosynthetic process; P:'de novo' UMP biosynthetic process; F:nucleotide binding; F:carbamoyl-phosphate synthase (glutamine-hydrolyzing) activity; F:ATP binding; F:ligase activity	COG0505@1|root,COG0505@2|Bacteria,1MUB9@1224|Proteobacteria,2VH9Q@28216|Betaproteobacteria,1K3MB@119060|Burkholderiaceae	F	Belongs to the CarA family	K01956	carA, CPA1; carbamoyl-phosphate synthase small subunit	[EC:6.3.5.5]	Alanine, aspartate and glutamate metabolism	Amino acid metabolism	Metabolism	PF00117	Glutamine amidotransferase class-I	-	6.3.5.-	-	1
NZ_CP052867	chromosome	chromosome:1	HJC54_RS13105	88071	89214	+	N	CDS	glutamine-hydrolyzing carbamoyl-phosphate synthase small subunit	10	P:GO:0006207; P:GO:0006221; P:GO:0006526; P:GO:0006541; P:GO:0008652; P:GO:0044205; F:GO:0000166; F:GO:0004088; F:GO:0005524; F:GO:0016874	P:'de novo' pyrimidine nucleobase biosynthetic process; P:pyrimidine nucleotide biosynthetic process; P:arginine biosynthetic process; P:glutamine metabolic process; P:cellular amino acid biosynthetic process; P:'de novo' UMP biosynthetic process; F:nucleotide binding; F:carbamoyl-phosphate synthase (glutamine-hydrolyzing) activity; F:ATP binding; F:ligase activity	COG0505@1|root,COG0505@2|Bacteria,1MUB9@1224|Proteobacteria,2VH9Q@28216|Betaproteobacteria,1K3MB@119060|Burkholderiaceae	F	Belongs to the CarA family	K01956	carA, CPA1; carbamoyl-phosphate synthase small subunit	[EC:6.3.5.5]	Alanine, aspartate and glutamate metabolism	Amino acid metabolism	Metabolism	PF00988	Carbamoyl-phosphate synthase small chain, CPSase domain	-	6.3.5.-	-	1
NZ_CP052867	chromosome	chromosome:1	HJC54_RS13115	89944	93199	+	N	CDS	carbamoyl-phosphate synthase large subunit	10	P:GO:0006221; P:GO:0006526; P:GO:0006807; P:GO:0008652; P:GO:0044205; F:GO:0000166; F:GO:0004088; F:GO:0005524; F:GO:0016874; F:GO:0046872	P:pyrimidine nucleotide biosynthetic process; P:arginine biosynthetic process; P:nitrogen compound metabolic process; P:cellular amino acid biosynthetic process; P:'de novo' UMP biosynthetic process; F:nucleotide binding; F:carbamoyl-phosphate synthase (glutamine-hydrolyzing) activity; F:ATP binding; F:ligase activity; F:metal ion binding	COG0458@1|root,COG0458@2|Bacteria,1MUDZ@1224|Proteobacteria,2VI4A@28216|Betaproteobacteria,1K2N9@119060|Burkholderiaceae	F	Carbamoyl-phosphate synthetase ammonia chain	K01955	carB, CPA2; carbamoyl-phosphate synthase large subunit	[EC:6.3.5.5]	Pyrimidine metabolism	Nucleotide metabolism	Metabolism	PF02142	MGS-like domain	-	6.3.5.-+3.5.2.-	-	1
NZ_CP052867	chromosome	chromosome:1	HJC54_RS13115	89944	93199	+	N	CDS	carbamoyl-phosphate synthase large subunit	10	P:GO:0006221; P:GO:0006526; P:GO:0006807; P:GO:0008652; P:GO:0044205; F:GO:0000166; F:GO:0004088; F:GO:0005524; F:GO:0016874; F:GO:0046872	P:pyrimidine nucleotide biosynthetic process; P:arginine biosynthetic process; P:nitrogen compound metabolic process; P:cellular amino acid biosynthetic process; P:'de novo' UMP biosynthetic process; F:nucleotide binding; F:carbamoyl-phosphate synthase (glutamine-hydrolyzing) activity; F:ATP binding; F:ligase activity; F:metal ion binding	COG0458@1|root,COG0458@2|Bacteria,1MUDZ@1224|Proteobacteria,2VI4A@28216|Betaproteobacteria,1K2N9@119060|Burkholderiaceae	F	Carbamoyl-phosphate synthetase ammonia chain	K01955	carB, CPA2; carbamoyl-phosphate synthase large subunit	[EC:6.3.5.5]	Pyrimidine metabolism	Nucleotide metabolism	Metabolism	PF02786	Carbamoyl-phosphate synthase L chain, ATP binding domain	-	6.3.5.-+3.5.2.-	-	1
NZ_CP052867	chromosome	chromosome:1	HJC54_RS13115	89944	93199	+	N	CDS	carbamoyl-phosphate synthase large subunit	10	P:GO:0006221; P:GO:0006526; P:GO:0006807; P:GO:0008652; P:GO:0044205; F:GO:0000166; F:GO:0004088; F:GO:0005524; F:GO:0016874; F:GO:0046872	P:pyrimidine nucleotide biosynthetic process; P:arginine biosynthetic process; P:nitrogen compound metabolic process; P:cellular amino acid biosynthetic process; P:'de novo' UMP biosynthetic process; F:nucleotide binding; F:carbamoyl-phosphate synthase (glutamine-hydrolyzing) activity; F:ATP binding; F:ligase activity; F:metal ion binding	COG0458@1|root,COG0458@2|Bacteria,1MUDZ@1224|Proteobacteria,2VI4A@28216|Betaproteobacteria,1K2N9@119060|Burkholderiaceae	F	Carbamoyl-phosphate synthetase ammonia chain	K01955	carB, CPA2; carbamoyl-phosphate synthase large subunit	[EC:6.3.5.5]	Pyrimidine metabolism	Nucleotide metabolism	Metabolism	PF02787	Carbamoyl-phosphate synthetase large chain, oligomerisation domain	-	6.3.5.-+3.5.2.-	-	1
NZ_CP052867	chromosome	chromosome:1	HJC54_RS13115	89944	93199	+	N	CDS	carbamoyl-phosphate synthase large subunit	10	P:GO:0006221; P:GO:0006526; P:GO:0006807; P:GO:0008652; P:GO:0044205; F:GO:0000166; F:GO:0004088; F:GO:0005524; F:GO:0016874; F:GO:0046872	P:pyrimidine nucleotide biosynthetic process; P:arginine biosynthetic process; P:nitrogen compound metabolic process; P:cellular amino acid biosynthetic process; P:'de novo' UMP biosynthetic process; F:nucleotide binding; F:carbamoyl-phosphate synthase (glutamine-hydrolyzing) activity; F:ATP binding; F:ligase activity; F:metal ion binding	COG0458@1|root,COG0458@2|Bacteria,1MUDZ@1224|Proteobacteria,2VI4A@28216|Betaproteobacteria,1K2N9@119060|Burkholderiaceae	F	Carbamoyl-phosphate synthetase ammonia chain	K01955	carB, CPA2; carbamoyl-phosphate synthase large subunit	[EC:6.3.5.5]	Alanine, aspartate and glutamate metabolism	Amino acid metabolism	Metabolism	PF02142	MGS-like domain	-	6.3.5.-+3.5.2.-	-	1
NZ_CP052867	chromosome	chromosome:1	HJC54_RS13115	89944	93199	+	N	CDS	carbamoyl-phosphate synthase large subunit	10	P:GO:0006221; P:GO:0006526; P:GO:0006807; P:GO:0008652; P:GO:0044205; F:GO:0000166; F:GO:0004088; F:GO:0005524; F:GO:0016874; F:GO:0046872	P:pyrimidine nucleotide biosynthetic process; P:arginine biosynthetic process; P:nitrogen compound metabolic process; P:cellular amino acid biosynthetic process; P:'de novo' UMP biosynthetic process; F:nucleotide binding; F:carbamoyl-phosphate synthase (glutamine-hydrolyzing) activity; F:ATP binding; F:ligase activity; F:metal ion binding	COG0458@1|root,COG0458@2|Bacteria,1MUDZ@1224|Proteobacteria,2VI4A@28216|Betaproteobacteria,1K2N9@119060|Burkholderiaceae	F	Carbamoyl-phosphate synthetase ammonia chain	K01955	carB, CPA2; carbamoyl-phosphate synthase large subunit	[EC:6.3.5.5]	Alanine, aspartate and glutamate metabolism	Amino acid metabolism	Metabolism	PF02786	Carbamoyl-phosphate synthase L chain, ATP binding domain	-	6.3.5.-+3.5.2.-	-	1
NZ_CP052867	chromosome	chromosome:1	HJC54_RS13115	89944	93199	+	N	CDS	carbamoyl-phosphate synthase large subunit	10	P:GO:0006221; P:GO:0006526; P:GO:0006807; P:GO:0008652; P:GO:0044205; F:GO:0000166; F:GO:0004088; F:GO:0005524; F:GO:0016874; F:GO:0046872	P:pyrimidine nucleotide biosynthetic process; P:arginine biosynthetic process; P:nitrogen compound metabolic process; P:cellular amino acid biosynthetic process; P:'de novo' UMP biosynthetic process; F:nucleotide binding; F:carbamoyl-phosphate synthase (glutamine-hydrolyzing) activity; F:ATP binding; F:ligase activity; F:metal ion binding	COG0458@1|root,COG0458@2|Bacteria,1MUDZ@1224|Proteobacteria,2VI4A@28216|Betaproteobacteria,1K2N9@119060|Burkholderiaceae	F	Carbamoyl-phosphate synthetase ammonia chain	K01955	carB, CPA2; carbamoyl-phosphate synthase large subunit	[EC:6.3.5.5]	Alanine, aspartate and glutamate metabolism	Amino acid metabolism	Metabolism	PF02787	Carbamoyl-phosphate synthetase large chain, oligomerisation domain	-	6.3.5.-+3.5.2.-	-	1
NZ_CP052867	chromosome	chromosome:1	HJC54_RS13125	93805	94294	+	N	CDS	DUF4149 domain-containing protein	2	C:GO:0016020; C:GO:0016021	C:membrane; C:integral component of membrane	2AJXH@1|root,31AKJ@2|Bacteria,1N1PK@1224|Proteobacteria,2VVA3@28216|Betaproteobacteria,1K57R@119060|Burkholderiaceae	S	Domain of unknown function (DUF4149)							PF13664	Domain of unknown function (DUF4149)
NZ_CP052867	chromosome	chromosome:1	HJC54_RS13145	97937	98801	+	N	CDS	dihydropteroate synthase	7	P:GO:0009396; P:GO:0042558; P:GO:0046654; P:GO:0046656; F:GO:0004156; F:GO:0016740; F:GO:0046872	P:folic acid-containing compound biosynthetic process; P:pteridine-containing compound metabolic process; P:tetrahydrofolate biosynthetic process; P:folic acid biosynthetic process; F:dihydropteroate synthase activity; F:transferase activity; F:metal ion binding	COG0294@1|root,COG0294@2|Bacteria,1MUIR@1224|Proteobacteria,2VH2Q@28216|Betaproteobacteria,1K2R5@119060|Burkholderiaceae	H	Catalyzes the condensation of para-aminobenzoate (pABA) with 6-hydroxymethyl-7,8-dihydropterin diphosphate (DHPt-PP) to form 7,8-dihydropteroate (H2Pte), the immediate precursor of folate derivatives	K00796	folP; dihydropteroate synthase	[EC:2.5.1.15]	Folate biosynthesis	Metabolism of cofactors and vitamins	Metabolism	PF00809	Pterin binding enzyme	-	2.5.1.-+6.3.2.-	-	1
NZ_CP052867	chromosome	chromosome:1	HJC54_RS13150	98833	100189	+	N	CDS	phosphoglucosamine mutase	7	P:GO:0005975; P:GO:0071704; F:GO:0000287; F:GO:0008966; F:GO:0016853; F:GO:0016868; F:GO:0046872	P:carbohydrate metabolic process; P:organic substance metabolic process; F:magnesium ion binding; F:phosphoglucosamine mutase activity; F:isomerase activity; F:intramolecular transferase activity, phosphotransferases; F:metal ion binding	COG1109@1|root,COG1109@2|Bacteria,1MU24@1224|Proteobacteria,2VI3U@28216|Betaproteobacteria,1K2CP@119060|Burkholderiaceae	G	Catalyzes the conversion of glucosamine-6-phosphate to glucosamine-1-phosphate	K03431	glmM; phosphoglucosamine mutase	[EC:5.4.2.10]	Amino sugar and nucleotide sugar metabolism	Carbohydrate metabolism	Metabolism	PF02878	Phosphoglucomutase/phosphomannomutase, alpha/beta/alpha domain I	-	5.4.2.-	-	1
NZ_CP052867	chromosome	chromosome:1	HJC54_RS13150	98833	100189	+	N	CDS	phosphoglucosamine mutase	7	P:GO:0005975; P:GO:0071704; F:GO:0000287; F:GO:0008966; F:GO:0016853; F:GO:0016868; F:GO:0046872	P:carbohydrate metabolic process; P:organic substance metabolic process; F:magnesium ion binding; F:phosphoglucosamine mutase activity; F:isomerase activity; F:intramolecular transferase activity, phosphotransferases; F:metal ion binding	COG1109@1|root,COG1109@2|Bacteria,1MU24@1224|Proteobacteria,2VI3U@28216|Betaproteobacteria,1K2CP@119060|Burkholderiaceae	G	Catalyzes the conversion of glucosamine-6-phosphate to glucosamine-1-phosphate	K03431	glmM; phosphoglucosamine mutase	[EC:5.4.2.10]	Amino sugar and nucleotide sugar metabolism	Carbohydrate metabolism	Metabolism	PF02880	Phosphoglucomutase/phosphomannomutase, alpha/beta/alpha domain III	-	5.4.2.-	-	1
NZ_CP052867	chromosome	chromosome:1	HJC54_RS13150	98833	100189	+	N	CDS	phosphoglucosamine mutase	7	P:GO:0005975; P:GO:0071704; F:GO:0000287; F:GO:0008966; F:GO:0016853; F:GO:0016868; F:GO:0046872	P:carbohydrate metabolic process; P:organic substance metabolic process; F:magnesium ion binding; F:phosphoglucosamine mutase activity; F:isomerase activity; F:intramolecular transferase activity, phosphotransferases; F:metal ion binding	COG1109@1|root,COG1109@2|Bacteria,1MU24@1224|Proteobacteria,2VI3U@28216|Betaproteobacteria,1K2CP@119060|Burkholderiaceae	G	Catalyzes the conversion of glucosamine-6-phosphate to glucosamine-1-phosphate	K03431	glmM; phosphoglucosamine mutase	[EC:5.4.2.10]	Amino sugar and nucleotide sugar metabolism	Carbohydrate metabolism	Metabolism	PF02879	Phosphoglucomutase/phosphomannomutase, alpha/beta/alpha domain II	-	5.4.2.-	-	1
NZ_CP052867	chromosome	chromosome:1	HJC54_RS13150	98833	100189	+	N	CDS	phosphoglucosamine mutase	7	P:GO:0005975; P:GO:0071704; F:GO:0000287; F:GO:0008966; F:GO:0016853; F:GO:0016868; F:GO:0046872	P:carbohydrate metabolic process; P:organic substance metabolic process; F:magnesium ion binding; F:phosphoglucosamine mutase activity; F:isomerase activity; F:intramolecular transferase activity, phosphotransferases; F:metal ion binding	COG1109@1|root,COG1109@2|Bacteria,1MU24@1224|Proteobacteria,2VI3U@28216|Betaproteobacteria,1K2CP@119060|Burkholderiaceae	G	Catalyzes the conversion of glucosamine-6-phosphate to glucosamine-1-phosphate	K03431	glmM; phosphoglucosamine mutase	[EC:5.4.2.10]	Amino sugar and nucleotide sugar metabolism	Carbohydrate metabolism	Metabolism	PF00408	Phosphoglucomutase/phosphomannomutase, C-terminal domain	-	5.4.2.-	-	1
NZ_CP052867	chromosome	chromosome:1	HJC54_RS13155	100901	101933	+	N	CDS	phosphate ABC transporter substrate-binding protein PstS	4	P:GO:0006817; P:GO:0035435; F:GO:0042301; C:GO:0043190	P:phosphate ion transport; P:phosphate ion transmembrane transport; F:phosphate ion binding; C:ATP-binding cassette (ABC) transporter complex	COG0226@1|root,COG0226@2|Bacteria,1MUAZ@1224|Proteobacteria,2VIJV@28216|Betaproteobacteria,1K0BS@119060|Burkholderiaceae	P	Part of the ABC transporter complex PstSACB involved in phosphate import	K02040	pstS; phosphate transport system substrate-binding protein		ABC transporters	Membrane transport	Environmental Information Processing	PF12849	PBP superfamily domain
NZ_CP052867	chromosome	chromosome:1	HJC54_RS13155	100901	101933	+	N	CDS	phosphate ABC transporter substrate-binding protein PstS	4	P:GO:0006817; P:GO:0035435; F:GO:0042301; C:GO:0043190	P:phosphate ion transport; P:phosphate ion transmembrane transport; F:phosphate ion binding; C:ATP-binding cassette (ABC) transporter complex	COG0226@1|root,COG0226@2|Bacteria,1MUAZ@1224|Proteobacteria,2VIJV@28216|Betaproteobacteria,1K0BS@119060|Burkholderiaceae	P	Part of the ABC transporter complex PstSACB involved in phosphate import	K02040	pstS; phosphate transport system substrate-binding protein		Two-component system	Signal transduction	Environmental Information Processing	PF12849	PBP superfamily domain
NZ_CP052867	chromosome	chromosome:1	HJC54_RS13155	100901	101933	+	N	CDS	phosphate ABC transporter substrate-binding protein PstS	4	P:GO:0006817; P:GO:0035435; F:GO:0042301; C:GO:0043190	P:phosphate ion transport; P:phosphate ion transmembrane transport; F:phosphate ion binding; C:ATP-binding cassette (ABC) transporter complex	COG0226@1|root,COG0226@2|Bacteria,1MUAZ@1224|Proteobacteria,2VIJV@28216|Betaproteobacteria,1K0BS@119060|Burkholderiaceae	P	Part of the ABC transporter complex PstSACB involved in phosphate import	K02040	pstS; phosphate transport system substrate-binding protein		Tuberculosis	Infectious disease: bacterial	Human Diseases	PF12849	PBP superfamily domain
NZ_CP052867	chromosome	chromosome:1	HJC54_RS13160	102045	103023	+	N	CDS	phosphate ABC transporter permease PstC	6	P:GO:0006817; P:GO:0055085; F:GO:0005315; C:GO:0005886; C:GO:0016020; C:GO:0016021	P:phosphate ion transport; P:transmembrane transport; F:inorganic phosphate transmembrane transporter activity; C:plasma membrane; C:membrane; C:integral component of membrane	COG0573@1|root,COG0573@2|Bacteria,1MVKP@1224|Proteobacteria,2VH4G@28216|Betaproteobacteria,1K00C@119060|Burkholderiaceae	P	probably responsible for the translocation of the substrate across the membrane	K02037	pstC; phosphate transport system permease protein		ABC transporters	Membrane transport	Environmental Information Processing	PF00528	Binding-protein-dependent transport system inner membrane component
NZ_CP052867	chromosome	chromosome:1	HJC54_RS13165	103019	103916	+	N	CDS	phosphate ABC transporter permease PstA	8	P:GO:0006817; P:GO:0035435; P:GO:0055085; F:GO:0005315; C:GO:0005886; C:GO:0005887; C:GO:0016020; C:GO:0016021	P:phosphate ion transport; P:phosphate ion transmembrane transport; P:transmembrane transport; F:inorganic phosphate transmembrane transporter activity; C:plasma membrane; C:integral component of plasma membrane; C:membrane; C:integral component of membrane	COG0581@1|root,COG0581@2|Bacteria,1MUWB@1224|Proteobacteria,2VH6Y@28216|Betaproteobacteria,1K0DQ@119060|Burkholderiaceae	P	TIGRFAM phosphate ABC transporter, inner membrane subunit PstA	K02038	pstA; phosphate transport system permease protein		ABC transporters	Membrane transport	Environmental Information Processing	PF00528	Binding-protein-dependent transport system inner membrane component
NZ_CP052867	chromosome	chromosome:1	HJC54_RS13170	103931	104780	+	N	CDS	phosphate ABC transporter ATP-binding protein PstB	9	P:GO:0006817; P:GO:0035435; F:GO:0000166; F:GO:0005315; F:GO:0005524; F:GO:0015415; F:GO:0016787; C:GO:0005886; C:GO:0016020	P:phosphate ion transport; P:phosphate ion transmembrane transport; F:nucleotide binding; F:inorganic phosphate transmembrane transporter activity; F:ATP binding; F:ATPase-coupled phosphate ion transmembrane transporter activity; F:hydrolase activity; C:plasma membrane; C:membrane	COG1117@1|root,COG1117@2|Bacteria,1MU16@1224|Proteobacteria,2VI4J@28216|Betaproteobacteria,1JZYI@119060|Burkholderiaceae	P	Part of the ABC transporter complex PstSACB involved in phosphate import. Responsible for energy coupling to the transport system	K02036	pstB; phosphate transport system ATP-binding protein	[EC:7.3.2.1]	ABC transporters	Membrane transport	Environmental Information Processing	PF00005	ABC transporter	-	7.3.2.-	-	1
NZ_CP052867	chromosome	chromosome:1	HJC54_RS13175	104796	105501	+	N	CDS	phosphate signaling complex protein PhoU	4	P:GO:0006817; P:GO:0030643; P:GO:0045936; C:GO:0005737	P:phosphate ion transport; P:cellular phosphate ion homeostasis; P:negative regulation of phosphate metabolic process; C:cytoplasm	COG0704@1|root,COG0704@2|Bacteria,1MUMI@1224|Proteobacteria,2VI2C@28216|Betaproteobacteria,1K1YY@119060|Burkholderiaceae	P	Plays a role in the regulation of phosphate uptake	K02039	phoU; phosphate transport system protein		Others	Unclassified: signaling and cellular processes	Not Included in Pathway or Brite	PF01895	PhoU domain
NZ_CP052867	chromosome	chromosome:1	HJC54_RS13180	105534	106236	+	N	CDS	phosphate regulon transcriptional regulator PhoB	5	P:GO:0000160; P:GO:0006355; P:GO:0006817; F:GO:0000156; F:GO:0003677	P:phosphorelay signal transduction system; P:regulation of transcription, DNA-templated; P:phosphate ion transport; F:phosphorelay response regulator activity; F:DNA binding	COG0745@1|root,COG0745@2|Bacteria,1MY2Z@1224|Proteobacteria,2VIT4@28216|Betaproteobacteria,1K1SS@119060|Burkholderiaceae	K	phosphate regulon transcriptional regulatory protein PhoB	K07657	phoB; two-component system, OmpR family, phosphate regulon response regulator PhoB		Two-component system	Signal transduction	Environmental Information Processing	PF00072	Response regulator receiver domain
NZ_CP052867	chromosome	chromosome:1	HJC54_RS13180	105534	106236	+	N	CDS	phosphate regulon transcriptional regulator PhoB	5	P:GO:0000160; P:GO:0006355; P:GO:0006817; F:GO:0000156; F:GO:0003677	P:phosphorelay signal transduction system; P:regulation of transcription, DNA-templated; P:phosphate ion transport; F:phosphorelay response regulator activity; F:DNA binding	COG0745@1|root,COG0745@2|Bacteria,1MY2Z@1224|Proteobacteria,2VIT4@28216|Betaproteobacteria,1K1SS@119060|Burkholderiaceae	K	phosphate regulon transcriptional regulatory protein PhoB	K07657	phoB; two-component system, OmpR family, phosphate regulon response regulator PhoB		Two-component system	Signal transduction	Environmental Information Processing	PF00486	Transcriptional regulatory protein, C terminal
NZ_CP052867	chromosome	chromosome:1	HJC54_RS13185	106302	107613	+	N	CDS	phosphate regulon sensor histidine kinase PhoR	13	P:GO:0000160; P:GO:0006470; P:GO:0006817; P:GO:0007165; P:GO:0016310; P:GO:0018106; F:GO:0000155; F:GO:0004673; F:GO:0004721; F:GO:0016301; F:GO:0016772; C:GO:0016020; C:GO:0016021	P:phosphorelay signal transduction system; P:protein dephosphorylation; P:phosphate ion transport; P:signal transduction; P:phosphorylation; P:peptidyl-histidine phosphorylation; F:phosphorelay sensor kinase activity; F:protein histidine kinase activity; F:phosphoprotein phosphatase activity; F:kinase activity; F:transferase activity, transferring phosphorus-containing groups; C:membrane; C:integ…	COG5002@1|root,COG5002@2|Bacteria,1MWF3@1224|Proteobacteria,2VIBV@28216|Betaproteobacteria,1K20K@119060|Burkholderiaceae	T	Histidine kinase	K07636	phoR; two-component system, OmpR family, phosphate regulon sensor histidine kinase PhoR	[EC:2.7.13.3]	Two-component system	Signal transduction	Environmental Information Processing	PF02518	Histidine kinase-, DNA gyrase B-, and HSP90-like ATPase	-	2.7.13.-	-	1
NZ_CP052867	chromosome	chromosome:1	HJC54_RS13185	106302	107613	+	N	CDS	phosphate regulon sensor histidine kinase PhoR	13	P:GO:0000160; P:GO:0006470; P:GO:0006817; P:GO:0007165; P:GO:0016310; P:GO:0018106; F:GO:0000155; F:GO:0004673; F:GO:0004721; F:GO:0016301; F:GO:0016772; C:GO:0016020; C:GO:0016021	P:phosphorelay signal transduction system; P:protein dephosphorylation; P:phosphate ion transport; P:signal transduction; P:phosphorylation; P:peptidyl-histidine phosphorylation; F:phosphorelay sensor kinase activity; F:protein histidine kinase activity; F:phosphoprotein phosphatase activity; F:kinase activity; F:transferase activity, transferring phosphorus-containing groups; C:membrane; C:integ…	COG5002@1|root,COG5002@2|Bacteria,1MWF3@1224|Proteobacteria,2VIBV@28216|Betaproteobacteria,1K20K@119060|Burkholderiaceae	T	Histidine kinase	K07636	phoR; two-component system, OmpR family, phosphate regulon sensor histidine kinase PhoR	[EC:2.7.13.3]	Two-component system	Signal transduction	Environmental Information Processing	PF00512	His Kinase A (phospho-acceptor) domain	-	2.7.13.-	-	1
NZ_CP052867	chromosome	chromosome:1	HJC54_RS13185	106302	107613	+	N	CDS	phosphate regulon sensor histidine kinase PhoR	13	P:GO:0000160; P:GO:0006470; P:GO:0006817; P:GO:0007165; P:GO:0016310; P:GO:0018106; F:GO:0000155; F:GO:0004673; F:GO:0004721; F:GO:0016301; F:GO:0016772; C:GO:0016020; C:GO:0016021	P:phosphorelay signal transduction system; P:protein dephosphorylation; P:phosphate ion transport; P:signal transduction; P:phosphorylation; P:peptidyl-histidine phosphorylation; F:phosphorelay sensor kinase activity; F:protein histidine kinase activity; F:phosphoprotein phosphatase activity; F:kinase activity; F:transferase activity, transferring phosphorus-containing groups; C:membrane; C:integ…	COG5002@1|root,COG5002@2|Bacteria,1MWF3@1224|Proteobacteria,2VIBV@28216|Betaproteobacteria,1K20K@119060|Burkholderiaceae	T	Histidine kinase	K07636	phoR; two-component system, OmpR family, phosphate regulon sensor histidine kinase PhoR	[EC:2.7.13.3]	Two-component system	Signal transduction	Environmental Information Processing	PF11808	Phosphate regulon sensor protein PhoR	-	2.7.13.-	-	1
NZ_CP052867	chromosome	chromosome:1	HJC54_RS13190	107737	109801	-	N	CDS	polyphosphate kinase 1	9	P:GO:0006799; P:GO:0016310; F:GO:0000166; F:GO:0005524; F:GO:0008976; F:GO:0016301; F:GO:0016740; F:GO:0046872; C:GO:0009358	P:polyphosphate biosynthetic process; P:phosphorylation; F:nucleotide binding; F:ATP binding; F:polyphosphate kinase activity; F:kinase activity; F:transferase activity; F:metal ion binding; C:polyphosphate kinase complex	COG0855@1|root,COG0855@2|Bacteria,1MUM3@1224|Proteobacteria,2VHH8@28216|Betaproteobacteria,1K1YJ@119060|Burkholderiaceae	H	Catalyzes the reversible transfer of the terminal phosphate of ATP to form a long-chain polyphosphate (polyP)	K00937	ppk1; polyphosphate kinase	[EC:2.7.4.1]	Oxidative phosphorylation	Energy metabolism	Metabolism	PF13090	Polyphosphate kinase C-terminal domain 2	-	2.7.4.-	-	1				A0A069B091	reduced virulence
NZ_CP052867	chromosome	chromosome:1	HJC54_RS13190	107737	109801	-	N	CDS	polyphosphate kinase 1	9	P:GO:0006799; P:GO:0016310; F:GO:0000166; F:GO:0005524; F:GO:0008976; F:GO:0016301; F:GO:0016740; F:GO:0046872; C:GO:0009358	P:polyphosphate biosynthetic process; P:phosphorylation; F:nucleotide binding; F:ATP binding; F:polyphosphate kinase activity; F:kinase activity; F:transferase activity; F:metal ion binding; C:polyphosphate kinase complex	COG0855@1|root,COG0855@2|Bacteria,1MUM3@1224|Proteobacteria,2VHH8@28216|Betaproteobacteria,1K1YJ@119060|Burkholderiaceae	H	Catalyzes the reversible transfer of the terminal phosphate of ATP to form a long-chain polyphosphate (polyP)	K00937	ppk1; polyphosphate kinase	[EC:2.7.4.1]	Oxidative phosphorylation	Energy metabolism	Metabolism	PF17941	Polyphosphate kinase C-terminal domain 1	-	2.7.4.-	-	1				A0A069B091	reduced virulence
NZ_CP052867	chromosome	chromosome:1	HJC54_RS13190	107737	109801	-	N	CDS	polyphosphate kinase 1	9	P:GO:0006799; P:GO:0016310; F:GO:0000166; F:GO:0005524; F:GO:0008976; F:GO:0016301; F:GO:0016740; F:GO:0046872; C:GO:0009358	P:polyphosphate biosynthetic process; P:phosphorylation; F:nucleotide binding; F:ATP binding; F:polyphosphate kinase activity; F:kinase activity; F:transferase activity; F:metal ion binding; C:polyphosphate kinase complex	COG0855@1|root,COG0855@2|Bacteria,1MUM3@1224|Proteobacteria,2VHH8@28216|Betaproteobacteria,1K1YJ@119060|Burkholderiaceae	H	Catalyzes the reversible transfer of the terminal phosphate of ATP to form a long-chain polyphosphate (polyP)	K00937	ppk1; polyphosphate kinase	[EC:2.7.4.1]	Oxidative phosphorylation	Energy metabolism	Metabolism	PF02503	Polyphosphate kinase middle domain	-	2.7.4.-	-	1				A0A069B091	reduced virulence
NZ_CP052867	chromosome	chromosome:1	HJC54_RS13190	107737	109801	-	N	CDS	polyphosphate kinase 1	9	P:GO:0006799; P:GO:0016310; F:GO:0000166; F:GO:0005524; F:GO:0008976; F:GO:0016301; F:GO:0016740; F:GO:0046872; C:GO:0009358	P:polyphosphate biosynthetic process; P:phosphorylation; F:nucleotide binding; F:ATP binding; F:polyphosphate kinase activity; F:kinase activity; F:transferase activity; F:metal ion binding; C:polyphosphate kinase complex	COG0855@1|root,COG0855@2|Bacteria,1MUM3@1224|Proteobacteria,2VHH8@28216|Betaproteobacteria,1K1YJ@119060|Burkholderiaceae	H	Catalyzes the reversible transfer of the terminal phosphate of ATP to form a long-chain polyphosphate (polyP)	K00937	ppk1; polyphosphate kinase	[EC:2.7.4.1]	Oxidative phosphorylation	Energy metabolism	Metabolism	PF13089	Polyphosphate kinase N-terminal domain	-	2.7.4.-	-	1				A0A069B091	reduced virulence
NZ_CP052867	chromosome	chromosome:1	HJC54_RS13190	107737	109801	-	N	CDS	polyphosphate kinase 1	9	P:GO:0006799; P:GO:0016310; F:GO:0000166; F:GO:0005524; F:GO:0008976; F:GO:0016301; F:GO:0016740; F:GO:0046872; C:GO:0009358	P:polyphosphate biosynthetic process; P:phosphorylation; F:nucleotide binding; F:ATP binding; F:polyphosphate kinase activity; F:kinase activity; F:transferase activity; F:metal ion binding; C:polyphosphate kinase complex	COG0855@1|root,COG0855@2|Bacteria,1MUM3@1224|Proteobacteria,2VHH8@28216|Betaproteobacteria,1K1YJ@119060|Burkholderiaceae	H	Catalyzes the reversible transfer of the terminal phosphate of ATP to form a long-chain polyphosphate (polyP)	K00937	ppk1; polyphosphate kinase	[EC:2.7.4.1]	RNA degradation	Folding, sorting and degradation	Genetic Information Processing	PF13090	Polyphosphate kinase C-terminal domain 2	-	2.7.4.-	-	1				A0A069B091	reduced virulence
NZ_CP052867	chromosome	chromosome:1	HJC54_RS13190	107737	109801	-	N	CDS	polyphosphate kinase 1	9	P:GO:0006799; P:GO:0016310; F:GO:0000166; F:GO:0005524; F:GO:0008976; F:GO:0016301; F:GO:0016740; F:GO:0046872; C:GO:0009358	P:polyphosphate biosynthetic process; P:phosphorylation; F:nucleotide binding; F:ATP binding; F:polyphosphate kinase activity; F:kinase activity; F:transferase activity; F:metal ion binding; C:polyphosphate kinase complex	COG0855@1|root,COG0855@2|Bacteria,1MUM3@1224|Proteobacteria,2VHH8@28216|Betaproteobacteria,1K1YJ@119060|Burkholderiaceae	H	Catalyzes the reversible transfer of the terminal phosphate of ATP to form a long-chain polyphosphate (polyP)	K00937	ppk1; polyphosphate kinase	[EC:2.7.4.1]	RNA degradation	Folding, sorting and degradation	Genetic Information Processing	PF17941	Polyphosphate kinase C-terminal domain 1	-	2.7.4.-	-	1				A0A069B091	reduced virulence
NZ_CP052867	chromosome	chromosome:1	HJC54_RS13190	107737	109801	-	N	CDS	polyphosphate kinase 1	9	P:GO:0006799; P:GO:0016310; F:GO:0000166; F:GO:0005524; F:GO:0008976; F:GO:0016301; F:GO:0016740; F:GO:0046872; C:GO:0009358	P:polyphosphate biosynthetic process; P:phosphorylation; F:nucleotide binding; F:ATP binding; F:polyphosphate kinase activity; F:kinase activity; F:transferase activity; F:metal ion binding; C:polyphosphate kinase complex	COG0855@1|root,COG0855@2|Bacteria,1MUM3@1224|Proteobacteria,2VHH8@28216|Betaproteobacteria,1K1YJ@119060|Burkholderiaceae	H	Catalyzes the reversible transfer of the terminal phosphate of ATP to form a long-chain polyphosphate (polyP)	K00937	ppk1; polyphosphate kinase	[EC:2.7.4.1]	RNA degradation	Folding, sorting and degradation	Genetic Information Processing	PF02503	Polyphosphate kinase middle domain	-	2.7.4.-	-	1				A0A069B091	reduced virulence
NZ_CP052867	chromosome	chromosome:1	HJC54_RS13190	107737	109801	-	N	CDS	polyphosphate kinase 1	9	P:GO:0006799; P:GO:0016310; F:GO:0000166; F:GO:0005524; F:GO:0008976; F:GO:0016301; F:GO:0016740; F:GO:0046872; C:GO:0009358	P:polyphosphate biosynthetic process; P:phosphorylation; F:nucleotide binding; F:ATP binding; F:polyphosphate kinase activity; F:kinase activity; F:transferase activity; F:metal ion binding; C:polyphosphate kinase complex	COG0855@1|root,COG0855@2|Bacteria,1MUM3@1224|Proteobacteria,2VHH8@28216|Betaproteobacteria,1K1YJ@119060|Burkholderiaceae	H	Catalyzes the reversible transfer of the terminal phosphate of ATP to form a long-chain polyphosphate (polyP)	K00937	ppk1; polyphosphate kinase	[EC:2.7.4.1]	RNA degradation	Folding, sorting and degradation	Genetic Information Processing	PF13089	Polyphosphate kinase N-terminal domain	-	2.7.4.-	-	1				A0A069B091	reduced virulence
NZ_CP052867	chromosome	chromosome:1	HJC54_RS13195	110154	111669	+	N	CDS	exopolyphosphatase	3	P:GO:0006793; F:GO:0004309; F:GO:0016787	P:phosphorus metabolic process; F:exopolyphosphatase activity; F:hydrolase activity	COG0248@1|root,COG0248@2|Bacteria,1MV35@1224|Proteobacteria,2VI1K@28216|Betaproteobacteria,1K0ST@119060|Burkholderiaceae	FP	PFAM Ppx GppA phosphatase	K01524	ppx-gppA; exopolyphosphatase / guanosine-5'-triphosphate,3'-diphosphate pyrophosphatase	[EC:3.6.1.11 3.6.1.40]	Purine metabolism	Nucleotide metabolism	Metabolism	PF02541	Ppx/GppA phosphatase family	-	3.6.1.-	-	1
NZ_CP052867	chromosome	chromosome:1	HJC54_RS13200	111738	112182	-	N	CDS	hypothetical protein				2A937@1|root,30Y7B@2|Bacteria,1PK37@1224|Proteobacteria,2W8DK@28216|Betaproteobacteria,1K795@119060|Burkholderiaceae	-	-
NZ_CP052867	chromosome	chromosome:1	HJC54_RS13205	112349	112751	-	N	CDS	hypothetical protein	1	F:GO:0005509	F:calcium ion binding	2F74J@1|root,33ZK4@2|Bacteria,1NYTR@1224|Proteobacteria,2W3T7@28216|Betaproteobacteria,1K8TC@119060|Burkholderiaceae	-	-
NZ_CP052867	chromosome	chromosome:1	HJC54_RS13210	112816	114592	-	N	CDS	peptidase S10	3	P:GO:0006508; F:GO:0004180; F:GO:0004185	P:proteolysis; F:carboxypeptidase activity; F:serine-type carboxypeptidase activity	COG2939@1|root,COG2939@2|Bacteria,1MW05@1224|Proteobacteria,2VK5M@28216|Betaproteobacteria,1JZUJ@119060|Burkholderiaceae	E	PFAM peptidase S10 serine carboxypeptidase							PF00450	Serine carboxypeptidase
NZ_CP052867	chromosome	chromosome:1	HJC54_RS13215	114934	115740	+	N	CDS	IS5 family transposase				COG3293@1|root,COG3293@2|Bacteria,1REUV@1224|Proteobacteria,1SD2K@1236|Gammaproteobacteria	L	COG3293 Transposase and inactivated derivatives							PF01609	Transposase DDE domain
NZ_CP052867	chromosome	chromosome:1	HJC54_RS13215	114934	115740	+	N	CDS	IS5 family transposase				COG3293@1|root,COG3293@2|Bacteria,1REUV@1224|Proteobacteria,1SD2K@1236|Gammaproteobacteria	L	COG3293 Transposase and inactivated derivatives							PF13340	Putative transposase of IS4/5 family (DUF4096)
NZ_CP052867	chromosome	chromosome:1	HJC54_RS13220	115899	116599	-	Y	CDS	DJ-1/PfpI family protein
NZ_CP052867	chromosome	chromosome:1	HJC54_RS13225	116667	116964	-	N	CDS	DUF1272 domain-containing protein				COG3813@1|root,COG3813@2|Bacteria,1N712@1224|Proteobacteria,2VUHC@28216|Betaproteobacteria,1K8SH@119060|Burkholderiaceae	S	Protein of unknown function (DUF1272)	K09984	K09984; uncharacterized protein		Function unknown	Poorly characterized	Not Included in Pathway or Brite	PF06906	Protein of unknown function (DUF1272)
NZ_CP052867	chromosome	chromosome:1	HJC54_RS13230	117165	118104	+	N	CDS	helix-turn-helix domain-containing protein	3	P:GO:0006355; F:GO:0003700; F:GO:0043565	P:regulation of transcription, DNA-templated; F:DNA-binding transcription factor activity; F:sequence-specific DNA binding	COG4977@1|root,COG4977@2|Bacteria,1MUDK@1224|Proteobacteria,2VHDN@28216|Betaproteobacteria,1K6TW@119060|Burkholderiaceae	K	DJ-1/PfpI family							PF12833	Helix-turn-helix domain
NZ_CP052867	chromosome	chromosome:1	HJC54_RS13230	117165	118104	+	N	CDS	helix-turn-helix domain-containing protein	3	P:GO:0006355; F:GO:0003700; F:GO:0043565	P:regulation of transcription, DNA-templated; F:DNA-binding transcription factor activity; F:sequence-specific DNA binding	COG4977@1|root,COG4977@2|Bacteria,1MUDK@1224|Proteobacteria,2VHDN@28216|Betaproteobacteria,1K6TW@119060|Burkholderiaceae	K	DJ-1/PfpI family							PF01965	DJ-1/PfpI family
NZ_CP052867	chromosome	chromosome:1	HJC54_RS13235	118135	118459	-	N	CDS	hypothetical protein				29S5X@1|root,30DAG@2|Bacteria,1PYFV@1224|Proteobacteria,2WDNU@28216|Betaproteobacteria,1KAP5@119060|Burkholderiaceae	-	-
NZ_CP052867	chromosome	chromosome:1	HJC54_RS13240	118631	118856	+	N	CDS	hypothetical protein
NZ_CP052867	chromosome	chromosome:1	HJC54_RS13245	118934	119303	+	N	CDS	hypothetical protein				2ERIU@1|root,33J4B@2|Bacteria,1NKKS@1224|Proteobacteria,2VYM7@28216|Betaproteobacteria,1K8XX@119060|Burkholderiaceae	-	-
NZ_CP052867	chromosome	chromosome:1	HJC54_RS13250	119430	120291	+	N	CDS	BON domain-containing protein				COG2823@1|root,COG2823@2|Bacteria,1N1R4@1224|Proteobacteria,2VV9E@28216|Betaproteobacteria,1K9WG@119060|Burkholderiaceae	S	BON domain							PF04972	BON domain
NZ_CP052867	chromosome	chromosome:1	HJC54_RS13255	120308	121292	-	N	CDS	sigma-54 dependent transcriptional regulator	3	P:GO:0006355; F:GO:0005524; F:GO:0043565	P:regulation of transcription, DNA-templated; F:ATP binding; F:sequence-specific DNA binding	COG2204@1|root,COG2204@2|Bacteria,1MU0N@1224|Proteobacteria,2VJP6@28216|Betaproteobacteria,1K2AK@119060|Burkholderiaceae	K	PFAM sigma-54 factor interaction domain-containing protein							PF02954	Bacterial regulatory protein, Fis family
NZ_CP052867	chromosome	chromosome:1	HJC54_RS13255	120308	121292	-	N	CDS	sigma-54 dependent transcriptional regulator	3	P:GO:0006355; F:GO:0005524; F:GO:0043565	P:regulation of transcription, DNA-templated; F:ATP binding; F:sequence-specific DNA binding	COG2204@1|root,COG2204@2|Bacteria,1MU0N@1224|Proteobacteria,2VJP6@28216|Betaproteobacteria,1K2AK@119060|Burkholderiaceae	K	PFAM sigma-54 factor interaction domain-containing protein							PF00158	Sigma-54 interaction domain
NZ_CP052867	chromosome	chromosome:1	HJC54_RS13260	121682	123047	+	N	CDS	sigma-54 dependent transcriptional regulator	6	P:GO:0000160; P:GO:0006355; F:GO:0000166; F:GO:0003677; F:GO:0005524; F:GO:0043565	P:phosphorelay signal transduction system; P:regulation of transcription, DNA-templated; F:nucleotide binding; F:DNA binding; F:ATP binding; F:sequence-specific DNA binding	COG2204@1|root,COG2204@2|Bacteria,1MU0N@1224|Proteobacteria,2VHSB@28216|Betaproteobacteria,1K375@119060|Burkholderiaceae	T	response regulator	K07714	atoC; two-component system, NtrC family, response regulator AtoC		Two-component system	Signal transduction	Environmental Information Processing	PF00072	Response regulator receiver domain	-	-	GT2	1
NZ_CP052867	chromosome	chromosome:1	HJC54_RS13260	121682	123047	+	N	CDS	sigma-54 dependent transcriptional regulator	6	P:GO:0000160; P:GO:0006355; F:GO:0000166; F:GO:0003677; F:GO:0005524; F:GO:0043565	P:phosphorelay signal transduction system; P:regulation of transcription, DNA-templated; F:nucleotide binding; F:DNA binding; F:ATP binding; F:sequence-specific DNA binding	COG2204@1|root,COG2204@2|Bacteria,1MU0N@1224|Proteobacteria,2VHSB@28216|Betaproteobacteria,1K375@119060|Burkholderiaceae	T	response regulator	K07714	atoC; two-component system, NtrC family, response regulator AtoC		Two-component system	Signal transduction	Environmental Information Processing	PF00158	Sigma-54 interaction domain	-	-	GT2	1
NZ_CP052867	chromosome	chromosome:1	HJC54_RS13260	121682	123047	+	N	CDS	sigma-54 dependent transcriptional regulator	6	P:GO:0000160; P:GO:0006355; F:GO:0000166; F:GO:0003677; F:GO:0005524; F:GO:0043565	P:phosphorelay signal transduction system; P:regulation of transcription, DNA-templated; F:nucleotide binding; F:DNA binding; F:ATP binding; F:sequence-specific DNA binding	COG2204@1|root,COG2204@2|Bacteria,1MU0N@1224|Proteobacteria,2VHSB@28216|Betaproteobacteria,1K375@119060|Burkholderiaceae	T	response regulator	K07714	atoC; two-component system, NtrC family, response regulator AtoC		Two-component system	Signal transduction	Environmental Information Processing	PF02954	Bacterial regulatory protein, Fis family	-	-	GT2	1
NZ_CP052867	chromosome	chromosome:1	HJC54_RS13265	123165	125523	+	N	CDS	PAS domain-containing protein	12	P:GO:0000160; P:GO:0006355; P:GO:0007165; P:GO:0016310; P:GO:0018106; F:GO:0000155; F:GO:0004673; F:GO:0016301; F:GO:0016772; C:GO:0005886; C:GO:0016020; C:GO:0016021	P:phosphorelay signal transduction system; P:regulation of transcription, DNA-templated; P:signal transduction; P:phosphorylation; P:peptidyl-histidine phosphorylation; F:phosphorelay sensor kinase activity; F:protein histidine kinase activity; F:kinase activity; F:transferase activity, transferring phosphorus-containing groups; C:plasma membrane; C:membrane; C:integral component of membrane	COG5002@1|root,COG5002@2|Bacteria,1R5EN@1224|Proteobacteria,2VJ3Z@28216|Betaproteobacteria,1KIFW@119060|Burkholderiaceae	T	histidine kinase A domain protein							PF02518	Histidine kinase-, DNA gyrase B-, and HSP90-like ATPase	-	2.7.13.-	-	1
NZ_CP052867	chromosome	chromosome:1	HJC54_RS13265	123165	125523	+	N	CDS	PAS domain-containing protein	12	P:GO:0000160; P:GO:0006355; P:GO:0007165; P:GO:0016310; P:GO:0018106; F:GO:0000155; F:GO:0004673; F:GO:0016301; F:GO:0016772; C:GO:0005886; C:GO:0016020; C:GO:0016021	P:phosphorelay signal transduction system; P:regulation of transcription, DNA-templated; P:signal transduction; P:phosphorylation; P:peptidyl-histidine phosphorylation; F:phosphorelay sensor kinase activity; F:protein histidine kinase activity; F:kinase activity; F:transferase activity, transferring phosphorus-containing groups; C:plasma membrane; C:membrane; C:integral component of membrane	COG5002@1|root,COG5002@2|Bacteria,1R5EN@1224|Proteobacteria,2VJ3Z@28216|Betaproteobacteria,1KIFW@119060|Burkholderiaceae	T	histidine kinase A domain protein							PF13493	Domain of unknown function (DUF4118)	-	2.7.13.-	-	1
NZ_CP052867	chromosome	chromosome:1	HJC54_RS13265	123165	125523	+	N	CDS	PAS domain-containing protein	12	P:GO:0000160; P:GO:0006355; P:GO:0007165; P:GO:0016310; P:GO:0018106; F:GO:0000155; F:GO:0004673; F:GO:0016301; F:GO:0016772; C:GO:0005886; C:GO:0016020; C:GO:0016021	P:phosphorelay signal transduction system; P:regulation of transcription, DNA-templated; P:signal transduction; P:phosphorylation; P:peptidyl-histidine phosphorylation; F:phosphorelay sensor kinase activity; F:protein histidine kinase activity; F:kinase activity; F:transferase activity, transferring phosphorus-containing groups; C:plasma membrane; C:membrane; C:integral component of membrane	COG5002@1|root,COG5002@2|Bacteria,1R5EN@1224|Proteobacteria,2VJ3Z@28216|Betaproteobacteria,1KIFW@119060|Burkholderiaceae	T	histidine kinase A domain protein							PF00072	Response regulator receiver domain	-	2.7.13.-	-	1
NZ_CP052867	chromosome	chromosome:1	HJC54_RS13265	123165	125523	+	N	CDS	PAS domain-containing protein	12	P:GO:0000160; P:GO:0006355; P:GO:0007165; P:GO:0016310; P:GO:0018106; F:GO:0000155; F:GO:0004673; F:GO:0016301; F:GO:0016772; C:GO:0005886; C:GO:0016020; C:GO:0016021	P:phosphorelay signal transduction system; P:regulation of transcription, DNA-templated; P:signal transduction; P:phosphorylation; P:peptidyl-histidine phosphorylation; F:phosphorelay sensor kinase activity; F:protein histidine kinase activity; F:kinase activity; F:transferase activity, transferring phosphorus-containing groups; C:plasma membrane; C:membrane; C:integral component of membrane	COG5002@1|root,COG5002@2|Bacteria,1R5EN@1224|Proteobacteria,2VJ3Z@28216|Betaproteobacteria,1KIFW@119060|Burkholderiaceae	T	histidine kinase A domain protein							PF00989	PAS fold	-	2.7.13.-	-	1
NZ_CP052867	chromosome	chromosome:1	HJC54_RS13265	123165	125523	+	N	CDS	PAS domain-containing protein	12	P:GO:0000160; P:GO:0006355; P:GO:0007165; P:GO:0016310; P:GO:0018106; F:GO:0000155; F:GO:0004673; F:GO:0016301; F:GO:0016772; C:GO:0005886; C:GO:0016020; C:GO:0016021	P:phosphorelay signal transduction system; P:regulation of transcription, DNA-templated; P:signal transduction; P:phosphorylation; P:peptidyl-histidine phosphorylation; F:phosphorelay sensor kinase activity; F:protein histidine kinase activity; F:kinase activity; F:transferase activity, transferring phosphorus-containing groups; C:plasma membrane; C:membrane; C:integral component of membrane	COG5002@1|root,COG5002@2|Bacteria,1R5EN@1224|Proteobacteria,2VJ3Z@28216|Betaproteobacteria,1KIFW@119060|Burkholderiaceae	T	histidine kinase A domain protein							PF08448	PAS fold	-	2.7.13.-	-	1
NZ_CP052867	chromosome	chromosome:1	HJC54_RS13265	123165	125523	+	N	CDS	PAS domain-containing protein	12	P:GO:0000160; P:GO:0006355; P:GO:0007165; P:GO:0016310; P:GO:0018106; F:GO:0000155; F:GO:0004673; F:GO:0016301; F:GO:0016772; C:GO:0005886; C:GO:0016020; C:GO:0016021	P:phosphorelay signal transduction system; P:regulation of transcription, DNA-templated; P:signal transduction; P:phosphorylation; P:peptidyl-histidine phosphorylation; F:phosphorelay sensor kinase activity; F:protein histidine kinase activity; F:kinase activity; F:transferase activity, transferring phosphorus-containing groups; C:plasma membrane; C:membrane; C:integral component of membrane	COG5002@1|root,COG5002@2|Bacteria,1R5EN@1224|Proteobacteria,2VJ3Z@28216|Betaproteobacteria,1KIFW@119060|Burkholderiaceae	T	histidine kinase A domain protein							PF00512	His Kinase A (phospho-acceptor) domain	-	2.7.13.-	-	1
NZ_CP052867	chromosome	chromosome:1	HJC54_RS13270	125831	126221	+	N	CDS	BON domain-containing protein				COG2823@1|root,COG2823@2|Bacteria,1NIM8@1224|Proteobacteria,2VY65@28216|Betaproteobacteria,1KABM@119060|Burkholderiaceae	S	BON domain	K04065	osmY; hyperosmotically inducible periplasmic protein		General function prediction only	Poorly characterized	Not Included in Pathway or Brite	PF04972	BON domain
NZ_CP052867	chromosome	chromosome:1	HJC54_RS13275	126343	126967	+	N	CDS	DUF4142 domain-containing protein				COG3652@1|root,COG3652@2|Bacteria,1N6QU@1224|Proteobacteria,2VTZW@28216|Betaproteobacteria,1K85S@119060|Burkholderiaceae	S	Domain of unknown function (DUF4142)	K08995	K08995; putative membrane protein		General function prediction only	Poorly characterized	Not Included in Pathway or Brite	PF13628	Domain of unknown function (DUF4142)
NZ_CP052867	chromosome	chromosome:1	HJC54_RS13280	127058	127655	+	N	CDS	hypothetical protein				COG1633@1|root,COG1633@2|Bacteria,1RB01@1224|Proteobacteria,2VQJI@28216|Betaproteobacteria,1K7GH@119060|Burkholderiaceae	S	Catalyzes the formation of the isocyclic ring in chlorophyll biosynthesis. Mediates the cyclase reaction, which results in the formation of divinylprotochlorophyllide (Pchlide) characteristic of all chlorophylls from magnesium-protoporphyrin IX 13-monomethyl ester (MgPMME)
NZ_CP052867	chromosome	chromosome:1	HJC54_RS13285	128010	128190	-	N	CDS	hypothetical protein
NZ_CP052867	chromosome	chromosome:1	HJC54_RS13290	128539	128833	+	N	CDS	hypothetical protein
NZ_CP052867	chromosome	chromosome:1	HJC54_RS13295	128977	129877	+	N	CDS	MipA/OmpV family protein	2	C:GO:0009279; C:GO:0016020	C:cell outer membrane; C:membrane	COG3713@1|root,COG3713@2|Bacteria,1NA1X@1224|Proteobacteria,2VVPV@28216|Betaproteobacteria,1K178@119060|Burkholderiaceae	M	PFAM MltA-interacting MipA family protein							PF06629	MltA-interacting protein MipA
NZ_CP052867	chromosome	chromosome:1	HJC54_RS13300	129946	130465	+	N	CDS	DUF3005 domain-containing protein	2	F:GO:0016740; F:GO:0016746	F:transferase activity; F:acyltransferase activity	2CG9B@1|root,3492S@2|Bacteria,1P3WJ@1224|Proteobacteria,2W4U3@28216|Betaproteobacteria,1KAFB@119060|Burkholderiaceae	C	Protein of unknown function (DUF3005)							PF11448	Protein of unknown function (DUF3005)
NZ_CP052867	chromosome	chromosome:1	HJC54_RS13305	130698	131466	-	N	CDS	DUF4397 domain-containing protein				COG1653@1|root,COG1653@2|Bacteria,1R5TB@1224|Proteobacteria,2VXNU@28216|Betaproteobacteria,1KFSI@119060|Burkholderiaceae	G	Domain of unknown function (DUF4397)							PF14344	Domain of unknown function (DUF4397)
NZ_CP052867	chromosome	chromosome:1	HJC54_RS13310	131996	133451	+	N	CDS	RNA polymerase factor sigma-54	10	P:GO:0006352; P:GO:0006355; P:GO:0045893; P:GO:2000142; F:GO:0001216; F:GO:0003677; F:GO:0003899; F:GO:0016740; F:GO:0016779; F:GO:0016987	P:DNA-templated transcription, initiation; P:regulation of transcription, DNA-templated; P:positive regulation of transcription, DNA-templated; P:regulation of DNA-templated transcription, initiation; F:DNA-binding transcription activator activity; F:DNA binding; F:DNA-directed 5'-3' RNA polymerase activity; F:transferase activity; F:nucleotidyltransferase activity; F:sigma factor activity	COG1508@1|root,COG1508@2|Bacteria,1MW4V@1224|Proteobacteria,2VMW6@28216|Betaproteobacteria,1K4TB@119060|Burkholderiaceae	K	Sigma factors are initiation factors that promote the attachment of RNA polymerase to specific initiation sites and are then released	K03092	rpoN; RNA polymerase sigma-54 factor		Two-component system	Signal transduction	Environmental Information Processing	PF00309	Sigma-54 factor, Activator interacting domain (AID)
NZ_CP052867	chromosome	chromosome:1	HJC54_RS13310	131996	133451	+	N	CDS	RNA polymerase factor sigma-54	10	P:GO:0006352; P:GO:0006355; P:GO:0045893; P:GO:2000142; F:GO:0001216; F:GO:0003677; F:GO:0003899; F:GO:0016740; F:GO:0016779; F:GO:0016987	P:DNA-templated transcription, initiation; P:regulation of transcription, DNA-templated; P:positive regulation of transcription, DNA-templated; P:regulation of DNA-templated transcription, initiation; F:DNA-binding transcription activator activity; F:DNA binding; F:DNA-directed 5'-3' RNA polymerase activity; F:transferase activity; F:nucleotidyltransferase activity; F:sigma factor activity	COG1508@1|root,COG1508@2|Bacteria,1MW4V@1224|Proteobacteria,2VMW6@28216|Betaproteobacteria,1K4TB@119060|Burkholderiaceae	K	Sigma factors are initiation factors that promote the attachment of RNA polymerase to specific initiation sites and are then released	K03092	rpoN; RNA polymerase sigma-54 factor		Two-component system	Signal transduction	Environmental Information Processing	PF04963	Sigma-54 factor, core binding domain
NZ_CP052867	chromosome	chromosome:1	HJC54_RS13310	131996	133451	+	N	CDS	RNA polymerase factor sigma-54	10	P:GO:0006352; P:GO:0006355; P:GO:0045893; P:GO:2000142; F:GO:0001216; F:GO:0003677; F:GO:0003899; F:GO:0016740; F:GO:0016779; F:GO:0016987	P:DNA-templated transcription, initiation; P:regulation of transcription, DNA-templated; P:positive regulation of transcription, DNA-templated; P:regulation of DNA-templated transcription, initiation; F:DNA-binding transcription activator activity; F:DNA binding; F:DNA-directed 5'-3' RNA polymerase activity; F:transferase activity; F:nucleotidyltransferase activity; F:sigma factor activity	COG1508@1|root,COG1508@2|Bacteria,1MW4V@1224|Proteobacteria,2VMW6@28216|Betaproteobacteria,1K4TB@119060|Burkholderiaceae	K	Sigma factors are initiation factors that promote the attachment of RNA polymerase to specific initiation sites and are then released	K03092	rpoN; RNA polymerase sigma-54 factor		Two-component system	Signal transduction	Environmental Information Processing	PF04552	Sigma-54, DNA binding domain
NZ_CP052867	chromosome	chromosome:1	HJC54_RS13310	131996	133451	+	N	CDS	RNA polymerase factor sigma-54	10	P:GO:0006352; P:GO:0006355; P:GO:0045893; P:GO:2000142; F:GO:0001216; F:GO:0003677; F:GO:0003899; F:GO:0016740; F:GO:0016779; F:GO:0016987	P:DNA-templated transcription, initiation; P:regulation of transcription, DNA-templated; P:positive regulation of transcription, DNA-templated; P:regulation of DNA-templated transcription, initiation; F:DNA-binding transcription activator activity; F:DNA binding; F:DNA-directed 5'-3' RNA polymerase activity; F:transferase activity; F:nucleotidyltransferase activity; F:sigma factor activity	COG1508@1|root,COG1508@2|Bacteria,1MW4V@1224|Proteobacteria,2VMW6@28216|Betaproteobacteria,1K4TB@119060|Burkholderiaceae	K	Sigma factors are initiation factors that promote the attachment of RNA polymerase to specific initiation sites and are then released	K03092	rpoN; RNA polymerase sigma-54 factor		Biofilm formation - Vibrio cholerae	Cellular community - prokaryotes	Cellular Processes	PF00309	Sigma-54 factor, Activator interacting domain (AID)
NZ_CP052867	chromosome	chromosome:1	HJC54_RS13310	131996	133451	+	N	CDS	RNA polymerase factor sigma-54	10	P:GO:0006352; P:GO:0006355; P:GO:0045893; P:GO:2000142; F:GO:0001216; F:GO:0003677; F:GO:0003899; F:GO:0016740; F:GO:0016779; F:GO:0016987	P:DNA-templated transcription, initiation; P:regulation of transcription, DNA-templated; P:positive regulation of transcription, DNA-templated; P:regulation of DNA-templated transcription, initiation; F:DNA-binding transcription activator activity; F:DNA binding; F:DNA-directed 5'-3' RNA polymerase activity; F:transferase activity; F:nucleotidyltransferase activity; F:sigma factor activity	COG1508@1|root,COG1508@2|Bacteria,1MW4V@1224|Proteobacteria,2VMW6@28216|Betaproteobacteria,1K4TB@119060|Burkholderiaceae	K	Sigma factors are initiation factors that promote the attachment of RNA polymerase to specific initiation sites and are then released	K03092	rpoN; RNA polymerase sigma-54 factor		Biofilm formation - Vibrio cholerae	Cellular community - prokaryotes	Cellular Processes	PF04963	Sigma-54 factor, core binding domain
NZ_CP052867	chromosome	chromosome:1	HJC54_RS13310	131996	133451	+	N	CDS	RNA polymerase factor sigma-54	10	P:GO:0006352; P:GO:0006355; P:GO:0045893; P:GO:2000142; F:GO:0001216; F:GO:0003677; F:GO:0003899; F:GO:0016740; F:GO:0016779; F:GO:0016987	P:DNA-templated transcription, initiation; P:regulation of transcription, DNA-templated; P:positive regulation of transcription, DNA-templated; P:regulation of DNA-templated transcription, initiation; F:DNA-binding transcription activator activity; F:DNA binding; F:DNA-directed 5'-3' RNA polymerase activity; F:transferase activity; F:nucleotidyltransferase activity; F:sigma factor activity	COG1508@1|root,COG1508@2|Bacteria,1MW4V@1224|Proteobacteria,2VMW6@28216|Betaproteobacteria,1K4TB@119060|Burkholderiaceae	K	Sigma factors are initiation factors that promote the attachment of RNA polymerase to specific initiation sites and are then released	K03092	rpoN; RNA polymerase sigma-54 factor		Biofilm formation - Vibrio cholerae	Cellular community - prokaryotes	Cellular Processes	PF04552	Sigma-54, DNA binding domain
NZ_CP052867	chromosome	chromosome:1	HJC54_RS13310	131996	133451	+	N	CDS	RNA polymerase factor sigma-54	10	P:GO:0006352; P:GO:0006355; P:GO:0045893; P:GO:2000142; F:GO:0001216; F:GO:0003677; F:GO:0003899; F:GO:0016740; F:GO:0016779; F:GO:0016987	P:DNA-templated transcription, initiation; P:regulation of transcription, DNA-templated; P:positive regulation of transcription, DNA-templated; P:regulation of DNA-templated transcription, initiation; F:DNA-binding transcription activator activity; F:DNA binding; F:DNA-directed 5'-3' RNA polymerase activity; F:transferase activity; F:nucleotidyltransferase activity; F:sigma factor activity	COG1508@1|root,COG1508@2|Bacteria,1MW4V@1224|Proteobacteria,2VMW6@28216|Betaproteobacteria,1K4TB@119060|Burkholderiaceae	K	Sigma factors are initiation factors that promote the attachment of RNA polymerase to specific initiation sites and are then released	K03092	rpoN; RNA polymerase sigma-54 factor		Flagellar assembly	Cell motility	Cellular Processes	PF00309	Sigma-54 factor, Activator interacting domain (AID)
NZ_CP052867	chromosome	chromosome:1	HJC54_RS13310	131996	133451	+	N	CDS	RNA polymerase factor sigma-54	10	P:GO:0006352; P:GO:0006355; P:GO:0045893; P:GO:2000142; F:GO:0001216; F:GO:0003677; F:GO:0003899; F:GO:0016740; F:GO:0016779; F:GO:0016987	P:DNA-templated transcription, initiation; P:regulation of transcription, DNA-templated; P:positive regulation of transcription, DNA-templated; P:regulation of DNA-templated transcription, initiation; F:DNA-binding transcription activator activity; F:DNA binding; F:DNA-directed 5'-3' RNA polymerase activity; F:transferase activity; F:nucleotidyltransferase activity; F:sigma factor activity	COG1508@1|root,COG1508@2|Bacteria,1MW4V@1224|Proteobacteria,2VMW6@28216|Betaproteobacteria,1K4TB@119060|Burkholderiaceae	K	Sigma factors are initiation factors that promote the attachment of RNA polymerase to specific initiation sites and are then released	K03092	rpoN; RNA polymerase sigma-54 factor		Flagellar assembly	Cell motility	Cellular Processes	PF04963	Sigma-54 factor, core binding domain
NZ_CP052867	chromosome	chromosome:1	HJC54_RS13310	131996	133451	+	N	CDS	RNA polymerase factor sigma-54	10	P:GO:0006352; P:GO:0006355; P:GO:0045893; P:GO:2000142; F:GO:0001216; F:GO:0003677; F:GO:0003899; F:GO:0016740; F:GO:0016779; F:GO:0016987	P:DNA-templated transcription, initiation; P:regulation of transcription, DNA-templated; P:positive regulation of transcription, DNA-templated; P:regulation of DNA-templated transcription, initiation; F:DNA-binding transcription activator activity; F:DNA binding; F:DNA-directed 5'-3' RNA polymerase activity; F:transferase activity; F:nucleotidyltransferase activity; F:sigma factor activity	COG1508@1|root,COG1508@2|Bacteria,1MW4V@1224|Proteobacteria,2VMW6@28216|Betaproteobacteria,1K4TB@119060|Burkholderiaceae	K	Sigma factors are initiation factors that promote the attachment of RNA polymerase to specific initiation sites and are then released	K03092	rpoN; RNA polymerase sigma-54 factor		Flagellar assembly	Cell motility	Cellular Processes	PF04552	Sigma-54, DNA binding domain
NZ_CP052867	chromosome	chromosome:1	HJC54_RS13315	133512	133674	+	N	CDS	DUF1328 domain-containing protein	3	C:GO:0005886; C:GO:0016020; C:GO:0016021	C:plasma membrane; C:membrane; C:integral component of membrane	COG5487@1|root,COG5487@2|Bacteria,1NGAH@1224|Proteobacteria	S	UPF0391 membrane protein							PF07043	Protein of unknown function (DUF1328)
NZ_CP052867	chromosome	chromosome:1	HJC54_RS13320	133847	134951	-	N	CDS	hybrid sensor histidine kinase/response regulator	8	P:GO:0000160; P:GO:0007165; P:GO:0016310; P:GO:0018106; F:GO:0000155; F:GO:0004673; F:GO:0016301; F:GO:0016772	P:phosphorelay signal transduction system; P:signal transduction; P:phosphorylation; P:peptidyl-histidine phosphorylation; F:phosphorelay sensor kinase activity; F:protein histidine kinase activity; F:kinase activity; F:transferase activity, transferring phosphorus-containing groups	COG0642@1|root,COG2199@1|root,COG2205@2|Bacteria,COG3706@2|Bacteria,1NRP8@1224|Proteobacteria,2VI45@28216|Betaproteobacteria,1K4BW@119060|Burkholderiaceae	T	histidine kinase A domain protein							PF00512	His Kinase A (phospho-acceptor) domain
NZ_CP052867	chromosome	chromosome:1	HJC54_RS13320	133847	134951	-	N	CDS	hybrid sensor histidine kinase/response regulator	8	P:GO:0000160; P:GO:0007165; P:GO:0016310; P:GO:0018106; F:GO:0000155; F:GO:0004673; F:GO:0016301; F:GO:0016772	P:phosphorelay signal transduction system; P:signal transduction; P:phosphorylation; P:peptidyl-histidine phosphorylation; F:phosphorelay sensor kinase activity; F:protein histidine kinase activity; F:kinase activity; F:transferase activity, transferring phosphorus-containing groups	COG0642@1|root,COG2199@1|root,COG2205@2|Bacteria,COG3706@2|Bacteria,1NRP8@1224|Proteobacteria,2VI45@28216|Betaproteobacteria,1K4BW@119060|Burkholderiaceae	T	histidine kinase A domain protein							PF02518	Histidine kinase-, DNA gyrase B-, and HSP90-like ATPase
NZ_CP052867	chromosome	chromosome:1	HJC54_RS13320	133847	134951	-	N	CDS	hybrid sensor histidine kinase/response regulator	8	P:GO:0000160; P:GO:0007165; P:GO:0016310; P:GO:0018106; F:GO:0000155; F:GO:0004673; F:GO:0016301; F:GO:0016772	P:phosphorelay signal transduction system; P:signal transduction; P:phosphorylation; P:peptidyl-histidine phosphorylation; F:phosphorelay sensor kinase activity; F:protein histidine kinase activity; F:kinase activity; F:transferase activity, transferring phosphorus-containing groups	COG0642@1|root,COG2199@1|root,COG2205@2|Bacteria,COG3706@2|Bacteria,1NRP8@1224|Proteobacteria,2VI45@28216|Betaproteobacteria,1K4BW@119060|Burkholderiaceae	T	histidine kinase A domain protein							PF00072	Response regulator receiver domain
NZ_CP052867	chromosome	chromosome:1	HJC54_RS13325	134959	135583	-	N	CDS	chemotaxis protein CheB	8	P:GO:0000160; P:GO:0006935; F:GO:0000156; F:GO:0008984; F:GO:0016787; C:GO:0005737; C:GO:0016020; C:GO:0016021	P:phosphorelay signal transduction system; P:chemotaxis; F:phosphorelay response regulator activity; F:protein-glutamate methylesterase activity; F:hydrolase activity; C:cytoplasm; C:membrane; C:integral component of membrane	COG2201@1|root,COG2201@2|Bacteria,1RCWE@1224|Proteobacteria,2VSSB@28216|Betaproteobacteria,1K4RS@119060|Burkholderiaceae	NT	PFAM CheB methylesterase	K03412	cheB; two-component system, chemotaxis family, protein-glutamate methylesterase/glutaminase	[EC:3.1.1.61 3.5.1.44]	Two-component system	Signal transduction	Environmental Information Processing	PF01339	CheB methylesterase
NZ_CP052867	chromosome	chromosome:1	HJC54_RS13325	134959	135583	-	N	CDS	chemotaxis protein CheB	8	P:GO:0000160; P:GO:0006935; F:GO:0000156; F:GO:0008984; F:GO:0016787; C:GO:0005737; C:GO:0016020; C:GO:0016021	P:phosphorelay signal transduction system; P:chemotaxis; F:phosphorelay response regulator activity; F:protein-glutamate methylesterase activity; F:hydrolase activity; C:cytoplasm; C:membrane; C:integral component of membrane	COG2201@1|root,COG2201@2|Bacteria,1RCWE@1224|Proteobacteria,2VSSB@28216|Betaproteobacteria,1K4RS@119060|Burkholderiaceae	NT	PFAM CheB methylesterase	K03412	cheB; two-component system, chemotaxis family, protein-glutamate methylesterase/glutaminase	[EC:3.1.1.61 3.5.1.44]	Bacterial chemotaxis	Cell motility	Cellular Processes	PF01339	CheB methylesterase
NZ_CP052867	chromosome	chromosome:1	HJC54_RS13330	135641	136490	-	N	CDS	protein-glutamate O-methyltransferase CheR	4	P:GO:0032259; F:GO:0008168; F:GO:0008757; F:GO:0016740	P:methylation; F:methyltransferase activity; F:S-adenosylmethionine-dependent methyltransferase activity; F:transferase activity	COG1352@1|root,COG1352@2|Bacteria,1NQTI@1224|Proteobacteria,2VT2E@28216|Betaproteobacteria,1K11A@119060|Burkholderiaceae	NT	PFAM MCP methyltransferase CheR-type	K00575	cheR; chemotaxis protein methyltransferase CheR	[EC:2.1.1.80]	Two-component system	Signal transduction	Environmental Information Processing	PF01739	CheR methyltransferase, SAM binding domain
NZ_CP052867	chromosome	chromosome:1	HJC54_RS13330	135641	136490	-	N	CDS	protein-glutamate O-methyltransferase CheR	4	P:GO:0032259; F:GO:0008168; F:GO:0008757; F:GO:0016740	P:methylation; F:methyltransferase activity; F:S-adenosylmethionine-dependent methyltransferase activity; F:transferase activity	COG1352@1|root,COG1352@2|Bacteria,1NQTI@1224|Proteobacteria,2VT2E@28216|Betaproteobacteria,1K11A@119060|Burkholderiaceae	NT	PFAM MCP methyltransferase CheR-type	K00575	cheR; chemotaxis protein methyltransferase CheR	[EC:2.1.1.80]	Two-component system	Signal transduction	Environmental Information Processing	PF03705	CheR methyltransferase, all-alpha domain
NZ_CP052867	chromosome	chromosome:1	HJC54_RS13330	135641	136490	-	N	CDS	protein-glutamate O-methyltransferase CheR	4	P:GO:0032259; F:GO:0008168; F:GO:0008757; F:GO:0016740	P:methylation; F:methyltransferase activity; F:S-adenosylmethionine-dependent methyltransferase activity; F:transferase activity	COG1352@1|root,COG1352@2|Bacteria,1NQTI@1224|Proteobacteria,2VT2E@28216|Betaproteobacteria,1K11A@119060|Burkholderiaceae	NT	PFAM MCP methyltransferase CheR-type	K00575	cheR; chemotaxis protein methyltransferase CheR	[EC:2.1.1.80]	Bacterial chemotaxis	Cell motility	Cellular Processes	PF01739	CheR methyltransferase, SAM binding domain
NZ_CP052867	chromosome	chromosome:1	HJC54_RS13330	135641	136490	-	N	CDS	protein-glutamate O-methyltransferase CheR	4	P:GO:0032259; F:GO:0008168; F:GO:0008757; F:GO:0016740	P:methylation; F:methyltransferase activity; F:S-adenosylmethionine-dependent methyltransferase activity; F:transferase activity	COG1352@1|root,COG1352@2|Bacteria,1NQTI@1224|Proteobacteria,2VT2E@28216|Betaproteobacteria,1K11A@119060|Burkholderiaceae	NT	PFAM MCP methyltransferase CheR-type	K00575	cheR; chemotaxis protein methyltransferase CheR	[EC:2.1.1.80]	Bacterial chemotaxis	Cell motility	Cellular Processes	PF03705	CheR methyltransferase, all-alpha domain
NZ_CP052867	chromosome	chromosome:1	HJC54_RS13335	136505	140054	-	Y	CDS	response regulator
NZ_CP052867	chromosome	chromosome:1	HJC54_RS13340	140586	140841	+	N	CDS	hypothetical protein													PF15603	Immunity protein 74
NZ_CP052867	chromosome	chromosome:1	HJC54_RS13345	141396	142830	+	N	CDS	AAA family ATPase	2	F:GO:0005524; F:GO:0016887	F:ATP binding; F:ATP hydrolysis activity	COG4637@1|root,COG4637@2|Bacteria,1PFRF@1224|Proteobacteria,2VWDZ@28216|Betaproteobacteria	S	AAA ATPase domain							PF13304	AAA domain, putative AbiEii toxin, Type IV TA system
NZ_CP052867	chromosome	chromosome:1	HJC54_RS13350	142845	143514	+	N	CDS	DUF4276 family protein				2BUN3@1|root,32PYT@2|Bacteria,1NFEE@1224|Proteobacteria,2W643@28216|Betaproteobacteria	S	Domain of unknown function (DUF4276)							PF14103	Domain of unknown function (DUF4276)
NZ_CP052867	chromosome	chromosome:1	HJC54_RS13355	144109	144289	-	N	CDS	integrase core domain-containing protein				COG2801@1|root,COG2801@2|Bacteria,1MVC8@1224|Proteobacteria,2VN0K@28216|Betaproteobacteria	L	HTH-like domain							PF13683	Integrase core domain
NZ_CP052867	chromosome	chromosome:1	HJC54_RS13360	144355	144592	-	N	CDS	hypothetical protein	2	C:GO:0016020; C:GO:0016021	C:membrane; C:integral component of membrane	2AGUW@1|root,31739@2|Bacteria,1PYBI@1224|Proteobacteria,2WDJ7@28216|Betaproteobacteria,1KAFP@119060|Burkholderiaceae	-	-
NZ_CP052867	chromosome	chromosome:1	HJC54_RS13365	144591	145085	-	Y	CDS	DUF2778 domain-containing protein
NZ_CP052867	chromosome	chromosome:1	HJC54_RS13370	145370	145447	-	N	tRNA	tRNA-Pro
NZ_CP052867	chromosome	chromosome:1	HJC54_RS13375	145559	146018	+	N	CDS	histidine phosphatase family protein	5	P:GO:0006094; P:GO:0006464; P:GO:0006470; F:GO:0101006; C:GO:0005737	P:gluconeogenesis; P:cellular protein modification process; P:protein dephosphorylation; F:protein histidine phosphatase activity; C:cytoplasm	COG2062@1|root,COG2062@2|Bacteria,1RIVH@1224|Proteobacteria,2VSSQ@28216|Betaproteobacteria,1K7HX@119060|Burkholderiaceae	T	phosphohistidine phosphatase	K08296	sixA; phosphohistidine phosphatase	[EC:3.1.3.-]	Enzymes with EC numbers	Unclassified: metabolism	Not Included in Pathway or Brite	PF00300	Histidine phosphatase superfamily (branch 1)
NZ_CP052867	chromosome	chromosome:1	HJC54_RS13380	146169	146988	+	N	CDS	GNAT family N-acetyltransferase	2	F:GO:0016740; F:GO:0016746	F:transferase activity; F:acyltransferase activity	COG3176@1|root,COG3176@2|Bacteria,1MWIM@1224|Proteobacteria,2VH4B@28216|Betaproteobacteria,1K24Q@119060|Burkholderiaceae	S	Acetyltransferase (GNAT) domain							PF13444	Acetyltransferase (GNAT) domain
NZ_CP052867	chromosome	chromosome:1	HJC54_RS13385	147189	147378	+	N	CDS	hypothetical protein				2AH4Q@1|root,317EC@2|Bacteria,1PYQG@1224|Proteobacteria,2WDVC@28216|Betaproteobacteria,1KB2G@119060|Burkholderiaceae	-	-
NZ_CP052867	chromosome	chromosome:1	HJC54_RS13395	148847	149183	-	N	CDS	DUF2288 domain-containing protein				COG5626@1|root,COG5626@2|Bacteria,1N8QB@1224|Proteobacteria,2VWJM@28216|Betaproteobacteria,1K8BG@119060|Burkholderiaceae	S	Protein of unknown function (DUF2288)							PF10052	Protein of unknown function (DUF2288)
NZ_CP052867	chromosome	chromosome:1	HJC54_RS13400	149417	151040	-	N	CDS	acyl-CoA synthetase				COG0365@1|root,COG0365@2|Bacteria,1MUF5@1224|Proteobacteria,2VJ5E@28216|Betaproteobacteria,1K0Z0@119060|Burkholderiaceae	I	PFAM AMP-dependent synthetase and ligase	K01895	ACSS1_2, acs; acetyl-CoA synthetase	[EC:6.2.1.1]	Glycolysis / Gluconeogenesis	Carbohydrate metabolism	Metabolism	PF13193	AMP-binding enzyme C-terminal domain	-	6.2.1.-	-	1
NZ_CP052867	chromosome	chromosome:1	HJC54_RS13400	149417	151040	-	N	CDS	acyl-CoA synthetase				COG0365@1|root,COG0365@2|Bacteria,1MUF5@1224|Proteobacteria,2VJ5E@28216|Betaproteobacteria,1K0Z0@119060|Burkholderiaceae	I	PFAM AMP-dependent synthetase and ligase	K01895	ACSS1_2, acs; acetyl-CoA synthetase	[EC:6.2.1.1]	Glycolysis / Gluconeogenesis	Carbohydrate metabolism	Metabolism	PF00501	AMP-binding enzyme	-	6.2.1.-	-	1
NZ_CP052867	chromosome	chromosome:1	HJC54_RS13400	149417	151040	-	N	CDS	acyl-CoA synthetase				COG0365@1|root,COG0365@2|Bacteria,1MUF5@1224|Proteobacteria,2VJ5E@28216|Betaproteobacteria,1K0Z0@119060|Burkholderiaceae	I	PFAM AMP-dependent synthetase and ligase	K01895	ACSS1_2, acs; acetyl-CoA synthetase	[EC:6.2.1.1]	Pyruvate metabolism	Carbohydrate metabolism	Metabolism	PF13193	AMP-binding enzyme C-terminal domain	-	6.2.1.-	-	1
NZ_CP052867	chromosome	chromosome:1	HJC54_RS13400	149417	151040	-	N	CDS	acyl-CoA synthetase				COG0365@1|root,COG0365@2|Bacteria,1MUF5@1224|Proteobacteria,2VJ5E@28216|Betaproteobacteria,1K0Z0@119060|Burkholderiaceae	I	PFAM AMP-dependent synthetase and ligase	K01895	ACSS1_2, acs; acetyl-CoA synthetase	[EC:6.2.1.1]	Pyruvate metabolism	Carbohydrate metabolism	Metabolism	PF00501	AMP-binding enzyme	-	6.2.1.-	-	1
NZ_CP052867	chromosome	chromosome:1	HJC54_RS13400	149417	151040	-	N	CDS	acyl-CoA synthetase				COG0365@1|root,COG0365@2|Bacteria,1MUF5@1224|Proteobacteria,2VJ5E@28216|Betaproteobacteria,1K0Z0@119060|Burkholderiaceae	I	PFAM AMP-dependent synthetase and ligase	K01895	ACSS1_2, acs; acetyl-CoA synthetase	[EC:6.2.1.1]	Glyoxylate and dicarboxylate metabolism	Carbohydrate metabolism	Metabolism	PF13193	AMP-binding enzyme C-terminal domain	-	6.2.1.-	-	1
NZ_CP052867	chromosome	chromosome:1	HJC54_RS13400	149417	151040	-	N	CDS	acyl-CoA synthetase				COG0365@1|root,COG0365@2|Bacteria,1MUF5@1224|Proteobacteria,2VJ5E@28216|Betaproteobacteria,1K0Z0@119060|Burkholderiaceae	I	PFAM AMP-dependent synthetase and ligase	K01895	ACSS1_2, acs; acetyl-CoA synthetase	[EC:6.2.1.1]	Glyoxylate and dicarboxylate metabolism	Carbohydrate metabolism	Metabolism	PF00501	AMP-binding enzyme	-	6.2.1.-	-	1
NZ_CP052867	chromosome	chromosome:1	HJC54_RS13400	149417	151040	-	N	CDS	acyl-CoA synthetase				COG0365@1|root,COG0365@2|Bacteria,1MUF5@1224|Proteobacteria,2VJ5E@28216|Betaproteobacteria,1K0Z0@119060|Burkholderiaceae	I	PFAM AMP-dependent synthetase and ligase	K01895	ACSS1_2, acs; acetyl-CoA synthetase	[EC:6.2.1.1]	Propanoate metabolism	Carbohydrate metabolism	Metabolism	PF13193	AMP-binding enzyme C-terminal domain	-	6.2.1.-	-	1
NZ_CP052867	chromosome	chromosome:1	HJC54_RS13400	149417	151040	-	N	CDS	acyl-CoA synthetase				COG0365@1|root,COG0365@2|Bacteria,1MUF5@1224|Proteobacteria,2VJ5E@28216|Betaproteobacteria,1K0Z0@119060|Burkholderiaceae	I	PFAM AMP-dependent synthetase and ligase	K01895	ACSS1_2, acs; acetyl-CoA synthetase	[EC:6.2.1.1]	Propanoate metabolism	Carbohydrate metabolism	Metabolism	PF00501	AMP-binding enzyme	-	6.2.1.-	-	1
NZ_CP052867	chromosome	chromosome:1	HJC54_RS13400	149417	151040	-	N	CDS	acyl-CoA synthetase				COG0365@1|root,COG0365@2|Bacteria,1MUF5@1224|Proteobacteria,2VJ5E@28216|Betaproteobacteria,1K0Z0@119060|Burkholderiaceae	I	PFAM AMP-dependent synthetase and ligase	K01895	ACSS1_2, acs; acetyl-CoA synthetase	[EC:6.2.1.1]	Carbon fixation pathways in prokaryotes	Energy metabolism	Metabolism	PF13193	AMP-binding enzyme C-terminal domain	-	6.2.1.-	-	1
NZ_CP052867	chromosome	chromosome:1	HJC54_RS13400	149417	151040	-	N	CDS	acyl-CoA synthetase				COG0365@1|root,COG0365@2|Bacteria,1MUF5@1224|Proteobacteria,2VJ5E@28216|Betaproteobacteria,1K0Z0@119060|Burkholderiaceae	I	PFAM AMP-dependent synthetase and ligase	K01895	ACSS1_2, acs; acetyl-CoA synthetase	[EC:6.2.1.1]	Carbon fixation pathways in prokaryotes	Energy metabolism	Metabolism	PF00501	AMP-binding enzyme	-	6.2.1.-	-	1
NZ_CP052867	chromosome	chromosome:1	HJC54_RS13400	149417	151040	-	N	CDS	acyl-CoA synthetase				COG0365@1|root,COG0365@2|Bacteria,1MUF5@1224|Proteobacteria,2VJ5E@28216|Betaproteobacteria,1K0Z0@119060|Burkholderiaceae	I	PFAM AMP-dependent synthetase and ligase	K01895	ACSS1_2, acs; acetyl-CoA synthetase	[EC:6.2.1.1]	Methane metabolism	Energy metabolism	Metabolism	PF13193	AMP-binding enzyme C-terminal domain	-	6.2.1.-	-	1
NZ_CP052867	chromosome	chromosome:1	HJC54_RS13400	149417	151040	-	N	CDS	acyl-CoA synthetase				COG0365@1|root,COG0365@2|Bacteria,1MUF5@1224|Proteobacteria,2VJ5E@28216|Betaproteobacteria,1K0Z0@119060|Burkholderiaceae	I	PFAM AMP-dependent synthetase and ligase	K01895	ACSS1_2, acs; acetyl-CoA synthetase	[EC:6.2.1.1]	Methane metabolism	Energy metabolism	Metabolism	PF00501	AMP-binding enzyme	-	6.2.1.-	-	1
NZ_CP052867	chromosome	chromosome:1	HJC54_RS13405	151363	152065	-	N	CDS	peptidoglycan DD-metalloendopeptidase family protein	2	C:GO:0016020; C:GO:0016021	C:membrane; C:integral component of membrane	COG4942@1|root,COG4942@2|Bacteria,1RD24@1224|Proteobacteria,2VR9F@28216|Betaproteobacteria,1K2JM@119060|Burkholderiaceae	DM	peptidase	K12943	ygeR; lipoprotein YgeR		Structural proteins	Unclassified: signaling and cellular processes	Not Included in Pathway or Brite	PF01551	Peptidase family M23
NZ_CP052867	chromosome	chromosome:1	HJC54_RS13405	151363	152065	-	N	CDS	peptidoglycan DD-metalloendopeptidase family protein	2	C:GO:0016020; C:GO:0016021	C:membrane; C:integral component of membrane	COG4942@1|root,COG4942@2|Bacteria,1RD24@1224|Proteobacteria,2VR9F@28216|Betaproteobacteria,1K2JM@119060|Burkholderiaceae	DM	peptidase	K12943	ygeR; lipoprotein YgeR		Structural proteins	Unclassified: signaling and cellular processes	Not Included in Pathway or Brite	PF01476	LysM domain
NZ_CP052867	chromosome	chromosome:1	HJC54_RS13410	152376	153285	-	N	CDS	aldose 1-epimerase	5	P:GO:0005975; F:GO:0003824; F:GO:0004034; F:GO:0016853; F:GO:0030246	P:carbohydrate metabolic process; F:catalytic activity; F:aldose 1-epimerase activity; F:isomerase activity; F:carbohydrate binding	COG2017@1|root,COG2017@2|Bacteria,1MVR4@1224|Proteobacteria,2VN5D@28216|Betaproteobacteria,1K0IP@119060|Burkholderiaceae	G	PFAM Aldose 1-epimerase							PF01263	Aldose 1-epimerase
NZ_CP052867	chromosome	chromosome:1	HJC54_RS13415	153589	153934	-	N	CDS	hypothetical protein
NZ_CP052867	chromosome	chromosome:1	HJC54_RS13420	153856	154687	+	N	CDS	undecaprenyl-diphosphate phosphatase	10	P:GO:0008360; P:GO:0009252; P:GO:0016311; P:GO:0046677; P:GO:0071555; F:GO:0016787; F:GO:0050380; C:GO:0005886; C:GO:0016020; C:GO:0016021	P:regulation of cell shape; P:peptidoglycan biosynthetic process; P:dephosphorylation; P:response to antibiotic; P:cell wall organization; F:hydrolase activity; F:undecaprenyl-diphosphatase activity; C:plasma membrane; C:membrane; C:integral component of membrane	COG1968@1|root,COG1968@2|Bacteria,1QVHA@1224|Proteobacteria,2VREJ@28216|Betaproteobacteria,1K4GS@119060|Burkholderiaceae	V	Catalyzes the dephosphorylation of undecaprenyl diphosphate (UPP). Confers resistance to bacitracin	K06153	bacA; undecaprenyl-diphosphatase	[EC:3.6.1.27]	Peptidoglycan biosynthesis	Glycan biosynthesis and metabolism	Metabolism	PF02673	Bacitracin resistance protein BacA	-	3.6.1.-	-	1
NZ_CP052867	chromosome	chromosome:1	HJC54_RS13425	154969	155046	+	N	tRNA	tRNA-Arg
NZ_CP052867	chromosome	chromosome:1	HJC54_RS13430	155084	156152	-	N	CDS	site-specific integrase	3	P:GO:0006310; P:GO:0015074; F:GO:0003677	P:DNA recombination; P:DNA integration; F:DNA binding	COG0582@1|root,COG0582@2|Bacteria,1MWBN@1224|Proteobacteria,2VK8Q@28216|Betaproteobacteria,1K61C@119060|Burkholderiaceae	L	Belongs to the 'phage' integrase family							PF00589	Phage integrase family
NZ_CP052867	chromosome	chromosome:1	HJC54_RS13435	156360	156748	-	Y	CDS	hypothetical protein
NZ_CP052867	chromosome	chromosome:1	HJC54_RS13440	157299	157887	+	N	CDS	hypothetical protein				2FEY1@1|root,346WS@2|Bacteria,1P2A2@1224|Proteobacteria,2W406@28216|Betaproteobacteria,1K4S8@119060|Burkholderiaceae	-	-
NZ_CP052867	chromosome	chromosome:1	HJC54_RS13445	158176	158563	-	N	CDS	helix-turn-helix domain-containing protein	1	F:GO:0003677	F:DNA binding	COG1396@1|root,COG1396@2|Bacteria,1N7DN@1224|Proteobacteria,2WCTC@28216|Betaproteobacteria,1K8EC@119060|Burkholderiaceae	K	Helix-turn-helix domain							PF01381	Helix-turn-helix
NZ_CP052867	chromosome	chromosome:1	HJC54_RS13455	159137	159263	+	Y	CDS	MarR family transcriptional regulator
NZ_CP052867	chromosome	chromosome:1	HJC54_RS13460	159267	159941	+	Y	CDS	late control protein
NZ_CP052867	chromosome	chromosome:1	HJC54_RS13465	160048	160387	+	N	CDS	holin	2	C:GO:0016020; C:GO:0016021	C:membrane; C:integral component of membrane
NZ_CP052867	chromosome	chromosome:1	HJC54_RS13470	160389	160668	+	N	CDS	holin	2	C:GO:0016020; C:GO:0016021	C:membrane; C:integral component of membrane
NZ_CP052867	chromosome	chromosome:1	HJC54_RS13475	160651	161074	+	N	CDS	glycoside hydrolase family protein	9	P:GO:0008152; P:GO:0009253; P:GO:0016998; P:GO:0019835; P:GO:0042742; F:GO:0003796; F:GO:0003824; F:GO:0016787; F:GO:0016798	P:metabolic process; P:peptidoglycan catabolic process; P:cell wall macromolecule catabolic process; P:cytolysis; P:defense response to bacterium; F:lysozyme activity; F:catalytic activity; F:hydrolase activity; F:hydrolase activity, acting on glycosyl bonds	COG3772@1|root,COG3772@2|Bacteria,1N0ZQ@1224|Proteobacteria,2VVDM@28216|Betaproteobacteria,1K8XQ@119060|Burkholderiaceae	S	lysozyme	K01185	E3.2.1.17; lysozyme	[EC:3.2.1.17]	Enzymes with EC numbers	Unclassified: metabolism	Not Included in Pathway or Brite	PF00959	Phage lysozyme	GH24(9-127)	-	-	1
NZ_CP052867	chromosome	chromosome:1	HJC54_RS13480	161079	161628	+	N	CDS	lysis system i-spanin subunit Rz	2	P:GO:0019076; P:GO:0019835	P:viral release from host cell; P:cytolysis	2BRZ4@1|root,32KZE@2|Bacteria,1Q9VG@1224|Proteobacteria,2WCZ8@28216|Betaproteobacteria,1K8TZ@119060|Burkholderiaceae	S	Bacteriophage Rz lysis protein	K14744	rzpD; prophage endopeptidase	[EC:3.4.-.-]	Enzymes with EC numbers	Unclassified: metabolism	Not Included in Pathway or Brite	PF03245	Bacteriophage Rz lysis protein
NZ_CP052867	chromosome	chromosome:1	HJC54_RS13485	161784	162570	+	N	CDS	DNA adenine methylase	5	P:GO:0032259; P:GO:0032775; F:GO:0008168; F:GO:0009007; F:GO:0016740	P:methylation; P:DNA methylation on adenine; F:methyltransferase activity; F:site-specific DNA-methyltransferase (adenine-specific) activity; F:transferase activity	COG0338@1|root,COG0338@2|Bacteria,1P85S@1224|Proteobacteria,2VKN7@28216|Betaproteobacteria,1K0NA@119060|Burkholderiaceae	L	D12 class N6 adenine-specific DNA methyltransferase							PF02086	D12 class N6 adenine-specific DNA methyltransferase
NZ_CP052867	chromosome	chromosome:1	HJC54_RS13490	162610	162805	-	N	CDS	hypothetical protein	2	C:GO:0016020; C:GO:0016021	C:membrane; C:integral component of membrane	2AGXS@1|root,3176C@2|Bacteria,1PYFI@1224|Proteobacteria,2WDNJ@28216|Betaproteobacteria,1KANP@119060|Burkholderiaceae	-	-
NZ_CP052867	chromosome	chromosome:1	HJC54_RS13495	162890	163619	-	N	CDS	immunity 52 family protein				2E1K0@1|root,32WXI@2|Bacteria,1N4K2@1224|Proteobacteria,2VVHS@28216|Betaproteobacteria,1K89W@119060|Burkholderiaceae	S	Immunity protein 52							PF15579	Immunity protein 52
NZ_CP052867	chromosome	chromosome:1	HJC54_RS13500	163623	164205	-	N	CDS	restriction endonuclease fold toxin 5 domain-containing protein				2E8N5@1|root,332ZH@2|Bacteria,1NNCA@1224|Proteobacteria,2VZ7G@28216|Betaproteobacteria,1K737@119060|Burkholderiaceae	S	Restriction endonuclease fold toxin 5							PF15648	Restriction endonuclease fold toxin 5
NZ_CP052867	chromosome	chromosome:1	HJC54_RS13505	164552	165056	-	N	CDS	DUF4123 domain-containing protein				2EQWJ@1|root,33IGC@2|Bacteria,1NGVW@1224|Proteobacteria,2W43G@28216|Betaproteobacteria,1K8E8@119060|Burkholderiaceae	S	Domain of unknown function (DUF4123)							PF13503	Domain of unknown function (DUF4123)
NZ_CP052867	chromosome	chromosome:1	HJC54_RS13510	165060	165468	-	N	CDS	PAAR domain-containing protein				COG4104@1|root,COG4104@2|Bacteria,1NEJD@1224|Proteobacteria,2VXE4@28216|Betaproteobacteria,1K8EF@119060|Burkholderiaceae	S	PAAR motif							PF05488	PAAR motif
NZ_CP052867	chromosome	chromosome:1	HJC54_RS13515	165819	167319	-	N	CDS	hypothetical protein				COG1192@1|root,COG1192@2|Bacteria	D	plasmid maintenance
NZ_CP052867	chromosome	chromosome:1	HJC54_RS13520	167343	169242	-	N	CDS	hypothetical protein
NZ_CP052867	chromosome	chromosome:1	HJC54_RS13525	169947	170325	+	N	CDS	DUF3592 domain-containing protein	2	C:GO:0016020; C:GO:0016021	C:membrane; C:integral component of membrane	2EPZG@1|root,33HK0@2|Bacteria,1NPT9@1224|Proteobacteria,2WAKJ@28216|Betaproteobacteria,1KAKH@119060|Burkholderiaceae	S	Protein of unknown function (DUF3592)							PF12158	Protein of unknown function (DUF3592)
NZ_CP052867	chromosome	chromosome:1	HJC54_RS13530	170346	170919	+	N	CDS	hypothetical protein				2CIEZ@1|root,34AR3@2|Bacteria,1P3JY@1224|Proteobacteria,2WDJ1@28216|Betaproteobacteria,1KAFA@119060|Burkholderiaceae	-	-
NZ_CP052867	chromosome	chromosome:1	HJC54_RS13540	172930	175090	+	N	CDS	type VI secretion system tip protein VgrG				COG3501@1|root,COG3501@2|Bacteria,1MU7Q@1224|Proteobacteria,2VJDF@28216|Betaproteobacteria,1K160@119060|Burkholderiaceae	M	Rhs element Vgr	K11904	vgrG; type VI secretion system secreted protein VgrG		Bacterial secretion system	Membrane transport	Environmental Information Processing	PF06715	Gp5 C-terminal repeat (3 copies)
NZ_CP052867	chromosome	chromosome:1	HJC54_RS13540	172930	175090	+	N	CDS	type VI secretion system tip protein VgrG				COG3501@1|root,COG3501@2|Bacteria,1MU7Q@1224|Proteobacteria,2VJDF@28216|Betaproteobacteria,1K160@119060|Burkholderiaceae	M	Rhs element Vgr	K11904	vgrG; type VI secretion system secreted protein VgrG		Bacterial secretion system	Membrane transport	Environmental Information Processing	PF05954	Phage tail baseplate hub (GPD)
NZ_CP052867	chromosome	chromosome:1	HJC54_RS13540	172930	175090	+	N	CDS	type VI secretion system tip protein VgrG				COG3501@1|root,COG3501@2|Bacteria,1MU7Q@1224|Proteobacteria,2VJDF@28216|Betaproteobacteria,1K160@119060|Burkholderiaceae	M	Rhs element Vgr	K11904	vgrG; type VI secretion system secreted protein VgrG		Bacterial secretion system	Membrane transport	Environmental Information Processing	PF04717	Type VI secretion system/phage-baseplate injector OB domain
NZ_CP052867	chromosome	chromosome:1	HJC54_RS13545	175182	176472	+	N	CDS	hypothetical protein				COG1413@1|root,COG1413@2|Bacteria	C	deoxyhypusine monooxygenase activity
NZ_CP052867	chromosome	chromosome:1	HJC54_RS13550	176468	176720	+	N	CDS	hypothetical protein				2B1GR@1|root,31TXQ@2|Bacteria,1QRRC@1224|Proteobacteria,1TC77@1236|Gammaproteobacteria,3ZNCP@590|Salmonella	-	-
NZ_CP052867	chromosome	chromosome:1	HJC54_RS13555	176724	177813	+	N	CDS	DUF2169 domain-containing protein				COG5351@1|root,COG5351@2|Bacteria,1R3ZF@1224|Proteobacteria,2VS1K@28216|Betaproteobacteria,1K98W@119060|Burkholderiaceae	S	Uncharacterized protein conserved in bacteria (DUF2169)							PF09937	Uncharacterized protein conserved in bacteria (DUF2169)
NZ_CP052867	chromosome	chromosome:1	HJC54_RS13560	177809	178934	+	N	CDS	beta-ketoacyl synthase	1	F:GO:0016746	F:acyltransferase activity	COG0304@1|root,COG0304@2|Bacteria	I	3-oxoacyl-[acyl-carrier-protein] synthase activity	K00647	fabB; 3-oxoacyl-[acyl-carrier-protein] synthase I	[EC:2.3.1.41]	Fatty acid biosynthesis	Lipid metabolism	Metabolism
NZ_CP052867	chromosome	chromosome:1	HJC54_RS13560	177809	178934	+	N	CDS	beta-ketoacyl synthase	1	F:GO:0016746	F:acyltransferase activity	COG0304@1|root,COG0304@2|Bacteria	I	3-oxoacyl-[acyl-carrier-protein] synthase activity	K00647	fabB; 3-oxoacyl-[acyl-carrier-protein] synthase I	[EC:2.3.1.41]	Biotin metabolism	Metabolism of cofactors and vitamins	Metabolism
NZ_CP052867	chromosome	chromosome:1	HJC54_RS13565	178903	179953	+	N	CDS	DUF4150 domain-containing protein				COG1196@1|root,COG1196@2|Bacteria,1RJS1@1224|Proteobacteria,2VVCD@28216|Betaproteobacteria	D	Domain of unknown function (DUF4150)							PF13665	Domain of unknown function (DUF4150)
NZ_CP052867	chromosome	chromosome:1	HJC54_RS13570	180396	180984	+	N	CDS	DUF3396 domain-containing protein				2EG3P@1|root,339VQ@2|Bacteria,1NMTK@1224|Proteobacteria,2W6MJ@28216|Betaproteobacteria,1KF7T@119060|Burkholderiaceae	S	Protein of unknown function (DUF3396)							PF11876	Protein of unknown function (DUF3396)
NZ_CP052867	chromosome	chromosome:1	HJC54_RS13575	181142	182189	+	N	CDS	IS481 family transposase	2	P:GO:0015074; F:GO:0003676	P:DNA integration; F:nucleic acid binding	COG2801@1|root,COG2801@2|Bacteria,1MZ45@1224|Proteobacteria,2VNA0@28216|Betaproteobacteria,1K69X@119060|Burkholderiaceae	L	Integrase core domain							PF13683	Integrase core domain
NZ_CP052867	chromosome	chromosome:1	HJC54_RS13575	181142	182189	+	N	CDS	IS481 family transposase	2	P:GO:0015074; F:GO:0003676	P:DNA integration; F:nucleic acid binding	COG2801@1|root,COG2801@2|Bacteria,1MZ45@1224|Proteobacteria,2VNA0@28216|Betaproteobacteria,1K69X@119060|Burkholderiaceae	L	Integrase core domain							PF13551	Winged helix-turn helix
NZ_CP052867	chromosome	chromosome:1	HJC54_RS13580	182381	183619	+	N	CDS	IS3 family transposase				COG2801@1|root,COG2801@2|Bacteria,1MY62@1224|Proteobacteria,2VJAF@28216|Betaproteobacteria,1K2XD@119060|Burkholderiaceae	L	transposase	K07497	K07497; putative transposase		Replication and repair	Unclassified: genetic information processing	Not Included in Pathway or Brite	PF13276	HTH-like domain
NZ_CP052867	chromosome	chromosome:1	HJC54_RS13580	182381	183619	+	N	CDS	IS3 family transposase				COG2801@1|root,COG2801@2|Bacteria,1MY62@1224|Proteobacteria,2VJAF@28216|Betaproteobacteria,1K2XD@119060|Burkholderiaceae	L	transposase	K07497	K07497; putative transposase		Replication and repair	Unclassified: genetic information processing	Not Included in Pathway or Brite	PF13683	Integrase core domain
NZ_CP052867	chromosome	chromosome:1	HJC54_RS13580	182381	183619	+	N	CDS	IS3 family transposase				COG2801@1|root,COG2801@2|Bacteria,1MY62@1224|Proteobacteria,2VJAF@28216|Betaproteobacteria,1K2XD@119060|Burkholderiaceae	L	transposase	K07497	K07497; putative transposase		Replication and repair	Unclassified: genetic information processing	Not Included in Pathway or Brite	PF01527	Transposase
NZ_CP052867	chromosome	chromosome:1	HJC54_RS29400	183700	184353	-	Y	CDS	DDE-type integrase/transposase/recombinase
NZ_CP052867	chromosome	chromosome:1	HJC54_RS13600	184473	185277	-	N	CDS	phytanoyl-CoA dioxygenase family protein	1	F:GO:0051213	F:dioxygenase activity	COG5285@1|root,COG5285@2|Bacteria,1PI3P@1224|Proteobacteria,2W6P6@28216|Betaproteobacteria,1K2KM@119060|Burkholderiaceae	Q	Phytanoyl-CoA dioxygenase (PhyH)							PF05721	Phytanoyl-CoA dioxygenase (PhyH)
NZ_CP052867	chromosome	chromosome:1	HJC54_RS13605	185285	185864	-	N	CDS	methyltransferase domain-containing protein	3	P:GO:0032259; F:GO:0008168; F:GO:0016740	P:methylation; F:methyltransferase activity; F:transferase activity	COG2227@1|root,COG2227@2|Bacteria,1R007@1224|Proteobacteria,2WHR7@28216|Betaproteobacteria,1K2ZF@119060|Burkholderiaceae	H	Hypothetical methyltransferase							PF13489	Methyltransferase domain
NZ_CP052867	chromosome	chromosome:1	HJC54_RS13610	185922	186204	-	Y	CDS	glycosyltransferase
NZ_CP052867	chromosome	chromosome:1	HJC54_RS13615	186560	186797	+	N	CDS	hypothetical protein	3	P:GO:0006313; F:GO:0003677; F:GO:0004803	P:transposition, DNA-mediated; F:DNA binding; F:transposase activity	COG2963@1|root,COG2963@2|Bacteria,1N1AA@1224|Proteobacteria,2VSJA@28216|Betaproteobacteria,1K8EV@119060|Burkholderiaceae	L	transposase IS3 IS911 family protein	K07483	K07483; transposase		Replication and repair	Unclassified: genetic information processing	Not Included in Pathway or Brite
NZ_CP052867	chromosome	chromosome:1	HJC54_RS13620	187058	188105	-	N	CDS	IS481 family transposase	2	P:GO:0015074; F:GO:0003676	P:DNA integration; F:nucleic acid binding	COG2801@1|root,COG2801@2|Bacteria,1MZ45@1224|Proteobacteria,2VNA0@28216|Betaproteobacteria,1K69X@119060|Burkholderiaceae	L	Integrase core domain							PF13683	Integrase core domain
NZ_CP052867	chromosome	chromosome:1	HJC54_RS13620	187058	188105	-	N	CDS	IS481 family transposase	2	P:GO:0015074; F:GO:0003676	P:DNA integration; F:nucleic acid binding	COG2801@1|root,COG2801@2|Bacteria,1MZ45@1224|Proteobacteria,2VNA0@28216|Betaproteobacteria,1K69X@119060|Burkholderiaceae	L	Integrase core domain							PF13551	Winged helix-turn helix
NZ_CP052867	chromosome	chromosome:1	HJC54_RS13625	189233	189965	+	N	CDS	LuxR C-terminal-related transcriptional regulator	2	P:GO:0006355; F:GO:0003677	P:regulation of transcription, DNA-templated; F:DNA binding	COG2197@1|root,COG2197@2|Bacteria,1RG6R@1224|Proteobacteria,2VRUT@28216|Betaproteobacteria	K	PFAM regulatory protein LuxR	K19666	solR, cepR, tofR; LuxR family transcriptional regulator, quorum-sensing system regulator SolR		Two-component system	Signal transduction	Environmental Information Processing	PF00196	Bacterial regulatory proteins, luxR family										tofR
NZ_CP052867	chromosome	chromosome:1	HJC54_RS13625	189233	189965	+	N	CDS	LuxR C-terminal-related transcriptional regulator	2	P:GO:0006355; F:GO:0003677	P:regulation of transcription, DNA-templated; F:DNA binding	COG2197@1|root,COG2197@2|Bacteria,1RG6R@1224|Proteobacteria,2VRUT@28216|Betaproteobacteria	K	PFAM regulatory protein LuxR	K19666	solR, cepR, tofR; LuxR family transcriptional regulator, quorum-sensing system regulator SolR		Quorum sensing	Cellular community - prokaryotes	Cellular Processes	PF00196	Bacterial regulatory proteins, luxR family										tofR
NZ_CP052867	chromosome	chromosome:1	HJC54_RS13630	189977	190226	+	N	CDS	hypothetical protein	2	C:GO:0016020; C:GO:0016021	C:membrane; C:integral component of membrane
NZ_CP052867	chromosome	chromosome:1	HJC54_RS13635	190344	194341	+	Y	CDS	FAD/FMN-binding oxidoreductase
NZ_CP052867	chromosome	chromosome:1	HJC54_RS13640	194542	194758	-	N	CDS	hypothetical protein
NZ_CP052867	chromosome	chromosome:1	HJC54_RS13655	197062	197581	+	N	CDS	FixH family protein				2E4GK@1|root,32ZBS@2|Bacteria,1N72D@1224|Proteobacteria,2W7DB@28216|Betaproteobacteria,1KECZ@119060|Burkholderiaceae	S	YtkA-like							PF13115	YtkA-like
NZ_CP052867	chromosome	chromosome:1	HJC54_RS13660	197640	198774	+	N	CDS	DJ-1/PfpI family protein	3	P:GO:0006355; F:GO:0003700; F:GO:0043565	P:regulation of transcription, DNA-templated; F:DNA-binding transcription factor activity; F:sequence-specific DNA binding	COG0693@1|root,COG0693@2|Bacteria,1QJCZ@1224|Proteobacteria,2VJC4@28216|Betaproteobacteria,1K7K8@119060|Burkholderiaceae	S	DJ-1/PfpI family							PF01965	DJ-1/PfpI family
NZ_CP052867	chromosome	chromosome:1	HJC54_RS13665	198845	199628	+	N	CDS	outer membrane lipoprotein-sorting protein				COG2834@1|root,COG2834@2|Bacteria,1RE9C@1224|Proteobacteria,2VPGB@28216|Betaproteobacteria,1K503@119060|Burkholderiaceae	M	Outer membrane lipoprotein-sorting protein							PF17131	Outer membrane lipoprotein-sorting protein
NZ_CP052867	chromosome	chromosome:1	HJC54_RS13670	199624	200902	+	N	CDS	hypothetical protein				28PF9@1|root,2ZC6H@2|Bacteria,1RB2X@1224|Proteobacteria,2VQRS@28216|Betaproteobacteria,1K6WT@119060|Burkholderiaceae	-	-
NZ_CP052867	chromosome	chromosome:1	HJC54_RS13675	200983	201376	+	N	CDS	RidA family protein				COG0251@1|root,COG0251@2|Bacteria	J	oxidation-reduction process	K09022	ridA, tdcF, RIDA; 2-iminobutanoate/2-iminopropanoate deaminase	[EC:3.5.99.10]	Enzymes with EC numbers	Unclassified: metabolism	Not Included in Pathway or Brite	PF01042	Endoribonuclease L-PSP
NZ_CP052867	chromosome	chromosome:1	HJC54_RS13680	201394	202714	-	N	CDS	cytochrome-c peroxidase	9	P:GO:0022900; P:GO:0098869; F:GO:0004601; F:GO:0009055; F:GO:0016491; F:GO:0020037; F:GO:0046872; C:GO:0016020; C:GO:0016021	P:electron transport chain; P:cellular oxidant detoxification; F:peroxidase activity; F:electron transfer activity; F:oxidoreductase activity; F:heme binding; F:metal ion binding; C:membrane; C:integral component of membrane	COG1858@1|root,COG1858@2|Bacteria,1MV70@1224|Proteobacteria,2VI1Z@28216|Betaproteobacteria,1K385@119060|Burkholderiaceae	C	Di-haem cytochrome c peroxidase	K00428	E1.11.1.5; cytochrome c peroxidase	[EC:1.11.1.5]	Enzymes with EC numbers	Unclassified: metabolism	Not Included in Pathway or Brite	PF03150	Di-haem cytochrome c peroxidase
NZ_CP052867	chromosome	chromosome:1	HJC54_RS13685	202700	203663	-	N	CDS	amidohydrolase family protein	4	F:GO:0016787; F:GO:0016829; F:GO:0016831; F:GO:0046872	F:hydrolase activity; F:lyase activity; F:carboxy-lyase activity; F:metal ion binding	COG2159@1|root,COG2159@2|Bacteria	E	amidohydrolase	K07045	K07045; uncharacterized protein		Function unknown	Poorly characterized	Not Included in Pathway or Brite	PF04909	Amidohydrolase
NZ_CP052867	chromosome	chromosome:1	HJC54_RS13690	203659	204322	-	N	CDS	N-acetyltransferase	2	F:GO:0008080; F:GO:0016740	F:N-acetyltransferase activity; F:transferase activity	COG0454@1|root,COG0456@2|Bacteria,1N826@1224|Proteobacteria,2WDKW@28216|Betaproteobacteria,1KAJI@119060|Burkholderiaceae	K	Acetyltransferase (GNAT) family
NZ_CP052867	chromosome	chromosome:1	HJC54_RS13695	204335	205361	-	N	CDS	cysteine synthase family protein	3	P:GO:0006535; P:GO:0019344; F:GO:0016765	P:cysteine biosynthetic process from serine; P:cysteine biosynthetic process; F:transferase activity, transferring alkyl or aryl (other than methyl) groups	COG0031@1|root,COG0031@2|Bacteria,1MVGX@1224|Proteobacteria,2WFP0@28216|Betaproteobacteria,1K89P@119060|Burkholderiaceae	E	pyridoxal phosphate-dependent enzyme that may be involved in siderophore biosynthesis	K21949	sbnA; N-(2-amino-2-carboxyethyl)-L-glutamate synthase	[EC:2.5.1.140]	Biosynthesis of various antibiotics	Biosynthesis of other secondary metabolites	Metabolism	PF00291	Pyridoxal-phosphate dependent enzyme
NZ_CP052867	chromosome	chromosome:1	HJC54_RS13695	204335	205361	-	N	CDS	cysteine synthase family protein	3	P:GO:0006535; P:GO:0019344; F:GO:0016765	P:cysteine biosynthetic process from serine; P:cysteine biosynthetic process; F:transferase activity, transferring alkyl or aryl (other than methyl) groups	COG0031@1|root,COG0031@2|Bacteria,1MVGX@1224|Proteobacteria,2WFP0@28216|Betaproteobacteria,1K89P@119060|Burkholderiaceae	E	pyridoxal phosphate-dependent enzyme that may be involved in siderophore biosynthesis	K21949	sbnA; N-(2-amino-2-carboxyethyl)-L-glutamate synthase	[EC:2.5.1.140]	Biosynthesis of various other secondary metabolites	Biosynthesis of other secondary metabolites	Metabolism	PF00291	Pyridoxal-phosphate dependent enzyme
NZ_CP052867	chromosome	chromosome:1	HJC54_RS13700	205519	207349	-	N	CDS	alpha/beta hydrolase	1	F:GO:0016787	F:hydrolase activity	COG0596@1|root,COG0596@2|Bacteria	S	hydrolase activity, acting on ester bonds
NZ_CP052867	chromosome	chromosome:1	HJC54_RS13705	207357	207624	-	N	CDS	acyl carrier protein													PF00550	Phosphopantetheine attachment site
NZ_CP052867	chromosome	chromosome:1	HJC54_RS13710	207794	208541	+	N	CDS	iron-containing redox enzyme family protein				COG5424@1|root,COG5424@2|Bacteria,1R49M@1224|Proteobacteria,2VM2S@28216|Betaproteobacteria,1KDBF@119060|Burkholderiaceae	H	Iron-containing redox enzyme	K06137	pqqC; pyrroloquinoline-quinone synthase	[EC:1.3.3.11]	Enzymes with EC numbers	Unclassified: metabolism	Not Included in Pathway or Brite	PF14518	Iron-containing redox enzyme
NZ_CP052867	chromosome	chromosome:1	HJC54_RS13715	208554	210066	+	N	CDS	AMP-binding protein	1	F:GO:0016874	F:ligase activity	COG1022@1|root,COG1022@2|Bacteria,1MU4D@1224|Proteobacteria,2VI0U@28216|Betaproteobacteria,1K3GW@119060|Burkholderiaceae	I	Amp-dependent synthetase and ligase	K01897	ACSL, fadD; long-chain acyl-CoA synthetase	[EC:6.2.1.3]	Fatty acid biosynthesis	Lipid metabolism	Metabolism	PF00501	AMP-binding enzyme
NZ_CP052867	chromosome	chromosome:1	HJC54_RS13715	208554	210066	+	N	CDS	AMP-binding protein	1	F:GO:0016874	F:ligase activity	COG1022@1|root,COG1022@2|Bacteria,1MU4D@1224|Proteobacteria,2VI0U@28216|Betaproteobacteria,1K3GW@119060|Burkholderiaceae	I	Amp-dependent synthetase and ligase	K01897	ACSL, fadD; long-chain acyl-CoA synthetase	[EC:6.2.1.3]	Fatty acid degradation	Lipid metabolism	Metabolism	PF00501	AMP-binding enzyme
NZ_CP052867	chromosome	chromosome:1	HJC54_RS13715	208554	210066	+	N	CDS	AMP-binding protein	1	F:GO:0016874	F:ligase activity	COG1022@1|root,COG1022@2|Bacteria,1MU4D@1224|Proteobacteria,2VI0U@28216|Betaproteobacteria,1K3GW@119060|Burkholderiaceae	I	Amp-dependent synthetase and ligase	K01897	ACSL, fadD; long-chain acyl-CoA synthetase	[EC:6.2.1.3]	Peroxisome	Transport and catabolism	Cellular Processes	PF00501	AMP-binding enzyme
NZ_CP052867	chromosome	chromosome:1	HJC54_RS13715	208554	210066	+	N	CDS	AMP-binding protein	1	F:GO:0016874	F:ligase activity	COG1022@1|root,COG1022@2|Bacteria,1MU4D@1224|Proteobacteria,2VI0U@28216|Betaproteobacteria,1K3GW@119060|Burkholderiaceae	I	Amp-dependent synthetase and ligase	K01897	ACSL, fadD; long-chain acyl-CoA synthetase	[EC:6.2.1.3]	Ferroptosis	Cell growth and death	Cellular Processes	PF00501	AMP-binding enzyme
NZ_CP052867	chromosome	chromosome:1	HJC54_RS13715	208554	210066	+	N	CDS	AMP-binding protein	1	F:GO:0016874	F:ligase activity	COG1022@1|root,COG1022@2|Bacteria,1MU4D@1224|Proteobacteria,2VI0U@28216|Betaproteobacteria,1K3GW@119060|Burkholderiaceae	I	Amp-dependent synthetase and ligase	K01897	ACSL, fadD; long-chain acyl-CoA synthetase	[EC:6.2.1.3]	Quorum sensing	Cellular community - prokaryotes	Cellular Processes	PF00501	AMP-binding enzyme
NZ_CP052867	chromosome	chromosome:1	HJC54_RS13715	208554	210066	+	N	CDS	AMP-binding protein	1	F:GO:0016874	F:ligase activity	COG1022@1|root,COG1022@2|Bacteria,1MU4D@1224|Proteobacteria,2VI0U@28216|Betaproteobacteria,1K3GW@119060|Burkholderiaceae	I	Amp-dependent synthetase and ligase	K01897	ACSL, fadD; long-chain acyl-CoA synthetase	[EC:6.2.1.3]	Adipocytokine signaling pathway	Endocrine system	Organismal Systems	PF00501	AMP-binding enzyme
NZ_CP052867	chromosome	chromosome:1	HJC54_RS13715	208554	210066	+	N	CDS	AMP-binding protein	1	F:GO:0016874	F:ligase activity	COG1022@1|root,COG1022@2|Bacteria,1MU4D@1224|Proteobacteria,2VI0U@28216|Betaproteobacteria,1K3GW@119060|Burkholderiaceae	I	Amp-dependent synthetase and ligase	K01897	ACSL, fadD; long-chain acyl-CoA synthetase	[EC:6.2.1.3]	PPAR signaling pathway	Endocrine system	Organismal Systems	PF00501	AMP-binding enzyme
NZ_CP052867	chromosome	chromosome:1	HJC54_RS13715	208554	210066	+	N	CDS	AMP-binding protein	1	F:GO:0016874	F:ligase activity	COG1022@1|root,COG1022@2|Bacteria,1MU4D@1224|Proteobacteria,2VI0U@28216|Betaproteobacteria,1K3GW@119060|Burkholderiaceae	I	Amp-dependent synthetase and ligase	K01897	ACSL, fadD; long-chain acyl-CoA synthetase	[EC:6.2.1.3]	Thermogenesis	Environmental adaptation	Organismal Systems	PF00501	AMP-binding enzyme
NZ_CP052867	chromosome	chromosome:1	HJC54_RS13720	210130	212383	+	N	CDS	AMP-binding protein	4	P:GO:0008610; P:GO:1901576; F:GO:0003824; F:GO:0031177	P:lipid biosynthetic process; P:organic substance biosynthetic process; F:catalytic activity; F:phosphopantetheine binding	COG0318@1|root,COG0318@2|Bacteria,1MU6G@1224|Proteobacteria,2WGHZ@28216|Betaproteobacteria	IQ	amp-dependent synthetase and ligase							PF00501	AMP-binding enzyme	-	6.2.1.-	-	1
NZ_CP052867	chromosome	chromosome:1	HJC54_RS13720	210130	212383	+	N	CDS	AMP-binding protein	4	P:GO:0008610; P:GO:1901576; F:GO:0003824; F:GO:0031177	P:lipid biosynthetic process; P:organic substance biosynthetic process; F:catalytic activity; F:phosphopantetheine binding	COG0318@1|root,COG0318@2|Bacteria,1MU6G@1224|Proteobacteria,2WGHZ@28216|Betaproteobacteria	IQ	amp-dependent synthetase and ligase							PF00550	Phosphopantetheine attachment site	-	6.2.1.-	-	1
NZ_CP052867	chromosome	chromosome:1	HJC54_RS13725	212429	218048	+	N	CDS	SDR family NAD(P)-dependent oxidoreductase	5	P:GO:0006633; F:GO:0004315; F:GO:0016740; F:GO:0016746; F:GO:0031177	P:fatty acid biosynthetic process; F:3-oxoacyl-[acyl-carrier-protein] synthase activity; F:transferase activity; F:acyltransferase activity; F:phosphopantetheine binding	COG3321@1|root,COG3321@2|Bacteria,1R89Z@1224|Proteobacteria,2VP69@28216|Betaproteobacteria,1KG3G@119060|Burkholderiaceae	Q	Beta-ketoacyl synthase							PF00109	Beta-ketoacyl synthase, N-terminal domain	-	2.3.1.-	GT2	2
NZ_CP052867	chromosome	chromosome:1	HJC54_RS13725	212429	218048	+	N	CDS	SDR family NAD(P)-dependent oxidoreductase	5	P:GO:0006633; F:GO:0004315; F:GO:0016740; F:GO:0016746; F:GO:0031177	P:fatty acid biosynthetic process; F:3-oxoacyl-[acyl-carrier-protein] synthase activity; F:transferase activity; F:acyltransferase activity; F:phosphopantetheine binding	COG3321@1|root,COG3321@2|Bacteria,1R89Z@1224|Proteobacteria,2VP69@28216|Betaproteobacteria,1KG3G@119060|Burkholderiaceae	Q	Beta-ketoacyl synthase							PF02801	Beta-ketoacyl synthase, C-terminal domain	-	2.3.1.-	GT2	2
NZ_CP052867	chromosome	chromosome:1	HJC54_RS13725	212429	218048	+	N	CDS	SDR family NAD(P)-dependent oxidoreductase	5	P:GO:0006633; F:GO:0004315; F:GO:0016740; F:GO:0016746; F:GO:0031177	P:fatty acid biosynthetic process; F:3-oxoacyl-[acyl-carrier-protein] synthase activity; F:transferase activity; F:acyltransferase activity; F:phosphopantetheine binding	COG3321@1|root,COG3321@2|Bacteria,1R89Z@1224|Proteobacteria,2VP69@28216|Betaproteobacteria,1KG3G@119060|Burkholderiaceae	Q	Beta-ketoacyl synthase							PF14765	Polyketide synthase dehydratase	-	2.3.1.-	GT2	2
NZ_CP052867	chromosome	chromosome:1	HJC54_RS13725	212429	218048	+	N	CDS	SDR family NAD(P)-dependent oxidoreductase	5	P:GO:0006633; F:GO:0004315; F:GO:0016740; F:GO:0016746; F:GO:0031177	P:fatty acid biosynthetic process; F:3-oxoacyl-[acyl-carrier-protein] synthase activity; F:transferase activity; F:acyltransferase activity; F:phosphopantetheine binding	COG3321@1|root,COG3321@2|Bacteria,1R89Z@1224|Proteobacteria,2VP69@28216|Betaproteobacteria,1KG3G@119060|Burkholderiaceae	Q	Beta-ketoacyl synthase							PF00550	Phosphopantetheine attachment site	-	2.3.1.-	GT2	2
NZ_CP052867	chromosome	chromosome:1	HJC54_RS13725	212429	218048	+	N	CDS	SDR family NAD(P)-dependent oxidoreductase	5	P:GO:0006633; F:GO:0004315; F:GO:0016740; F:GO:0016746; F:GO:0031177	P:fatty acid biosynthetic process; F:3-oxoacyl-[acyl-carrier-protein] synthase activity; F:transferase activity; F:acyltransferase activity; F:phosphopantetheine binding	COG3321@1|root,COG3321@2|Bacteria,1R89Z@1224|Proteobacteria,2VP69@28216|Betaproteobacteria,1KG3G@119060|Burkholderiaceae	Q	Beta-ketoacyl synthase							PF00698	Acyl transferase domain	-	2.3.1.-	GT2	2
NZ_CP052867	chromosome	chromosome:1	HJC54_RS13725	212429	218048	+	N	CDS	SDR family NAD(P)-dependent oxidoreductase	5	P:GO:0006633; F:GO:0004315; F:GO:0016740; F:GO:0016746; F:GO:0031177	P:fatty acid biosynthetic process; F:3-oxoacyl-[acyl-carrier-protein] synthase activity; F:transferase activity; F:acyltransferase activity; F:phosphopantetheine binding	COG3321@1|root,COG3321@2|Bacteria,1R89Z@1224|Proteobacteria,2VP69@28216|Betaproteobacteria,1KG3G@119060|Burkholderiaceae	Q	Beta-ketoacyl synthase							PF16197	Ketoacyl-synthetase C-terminal extension	-	2.3.1.-	GT2	2
NZ_CP052867	chromosome	chromosome:1	HJC54_RS13725	212429	218048	+	N	CDS	SDR family NAD(P)-dependent oxidoreductase	5	P:GO:0006633; F:GO:0004315; F:GO:0016740; F:GO:0016746; F:GO:0031177	P:fatty acid biosynthetic process; F:3-oxoacyl-[acyl-carrier-protein] synthase activity; F:transferase activity; F:acyltransferase activity; F:phosphopantetheine binding	COG3321@1|root,COG3321@2|Bacteria,1R89Z@1224|Proteobacteria,2VP69@28216|Betaproteobacteria,1KG3G@119060|Burkholderiaceae	Q	Beta-ketoacyl synthase							PF08659	KR domain	-	2.3.1.-	GT2	2
NZ_CP052867	chromosome	chromosome:1	HJC54_RS13730	218044	222679	+	N	CDS	hypothetical protein	3	P:GO:1901576; F:GO:0003824; F:GO:0031177	P:organic substance biosynthetic process; F:catalytic activity; F:phosphopantetheine binding	COG1020@1|root,COG1020@2|Bacteria,1QK4F@1224|Proteobacteria,2VHRU@28216|Betaproteobacteria,1JZUU@119060|Burkholderiaceae	Q	amino acid adenylation domain protein							PF13193	AMP-binding enzyme C-terminal domain
NZ_CP052867	chromosome	chromosome:1	HJC54_RS13730	218044	222679	+	N	CDS	hypothetical protein	3	P:GO:1901576; F:GO:0003824; F:GO:0031177	P:organic substance biosynthetic process; F:catalytic activity; F:phosphopantetheine binding	COG1020@1|root,COG1020@2|Bacteria,1QK4F@1224|Proteobacteria,2VHRU@28216|Betaproteobacteria,1JZUU@119060|Burkholderiaceae	Q	amino acid adenylation domain protein							PF18563	TubC N-terminal docking domain
NZ_CP052867	chromosome	chromosome:1	HJC54_RS13730	218044	222679	+	N	CDS	hypothetical protein	3	P:GO:1901576; F:GO:0003824; F:GO:0031177	P:organic substance biosynthetic process; F:catalytic activity; F:phosphopantetheine binding	COG1020@1|root,COG1020@2|Bacteria,1QK4F@1224|Proteobacteria,2VHRU@28216|Betaproteobacteria,1JZUU@119060|Burkholderiaceae	Q	amino acid adenylation domain protein							PF00668	Condensation domain
NZ_CP052867	chromosome	chromosome:1	HJC54_RS13730	218044	222679	+	N	CDS	hypothetical protein	3	P:GO:1901576; F:GO:0003824; F:GO:0031177	P:organic substance biosynthetic process; F:catalytic activity; F:phosphopantetheine binding	COG1020@1|root,COG1020@2|Bacteria,1QK4F@1224|Proteobacteria,2VHRU@28216|Betaproteobacteria,1JZUU@119060|Burkholderiaceae	Q	amino acid adenylation domain protein							PF00550	Phosphopantetheine attachment site
NZ_CP052867	chromosome	chromosome:1	HJC54_RS13735	222697	227071	+	N	CDS	thioester reductase domain-containing protein	2	P:GO:1901576; F:GO:0003824	P:organic substance biosynthetic process; F:catalytic activity	COG1020@1|root,COG3320@1|root,COG1020@2|Bacteria,COG3320@2|Bacteria,1QSHC@1224|Proteobacteria,2VKRX@28216|Betaproteobacteria,1KBBR@119060|Burkholderiaceae	Q	Male sterility protein							PF00550	Phosphopantetheine attachment site
NZ_CP052867	chromosome	chromosome:1	HJC54_RS13735	222697	227071	+	N	CDS	thioester reductase domain-containing protein	2	P:GO:1901576; F:GO:0003824	P:organic substance biosynthetic process; F:catalytic activity	COG1020@1|root,COG3320@1|root,COG1020@2|Bacteria,COG3320@2|Bacteria,1QSHC@1224|Proteobacteria,2VKRX@28216|Betaproteobacteria,1KBBR@119060|Burkholderiaceae	Q	Male sterility protein							PF07993	Male sterility protein
NZ_CP052867	chromosome	chromosome:1	HJC54_RS13735	222697	227071	+	N	CDS	thioester reductase domain-containing protein	2	P:GO:1901576; F:GO:0003824	P:organic substance biosynthetic process; F:catalytic activity	COG1020@1|root,COG3320@1|root,COG1020@2|Bacteria,COG3320@2|Bacteria,1QSHC@1224|Proteobacteria,2VKRX@28216|Betaproteobacteria,1KBBR@119060|Burkholderiaceae	Q	Male sterility protein							PF00668	Condensation domain
NZ_CP052867	chromosome	chromosome:1	HJC54_RS13740	227275	228445	-	N	CDS	FUSC family protein	2	C:GO:0016020; C:GO:0016021	C:membrane; C:integral component of membrane	COG1289@1|root,COG1289@2|Bacteria,1RIYY@1224|Proteobacteria,2W9ZT@28216|Betaproteobacteria,1K1A0@119060|Burkholderiaceae	S	Fusaric acid resistance protein-like							PF13515	Fusaric acid resistance protein-like
NZ_CP052867	chromosome	chromosome:1	HJC54_RS13745	228674	229994	+	N	CDS	sensor domain-containing diguanylate cyclase	3	C:GO:0005886; C:GO:0016020; C:GO:0016021	C:plasma membrane; C:membrane; C:integral component of membrane	COG2199@1|root,COG3159@1|root,COG3159@2|Bacteria,COG3706@2|Bacteria,1R8F2@1224|Proteobacteria,2VJGD@28216|Betaproteobacteria,1K1G6@119060|Burkholderiaceae	T	Diguanylate cyclase							PF00990	Diguanylate cyclase, GGDEF domain
NZ_CP052867	chromosome	chromosome:1	HJC54_RS13745	228674	229994	+	N	CDS	sensor domain-containing diguanylate cyclase	3	C:GO:0005886; C:GO:0016020; C:GO:0016021	C:plasma membrane; C:membrane; C:integral component of membrane	COG2199@1|root,COG3159@1|root,COG3159@2|Bacteria,COG3706@2|Bacteria,1R8F2@1224|Proteobacteria,2VJGD@28216|Betaproteobacteria,1K1G6@119060|Burkholderiaceae	T	Diguanylate cyclase							PF04340	Protein of unknown function, DUF484
NZ_CP052867	chromosome	chromosome:1	HJC54_RS13750	230058	230250	+	N	CDS	hypothetical protein
NZ_CP052867	chromosome	chromosome:1	HJC54_RS13755	230356	231004	+	N	CDS	carbonic anhydrase	4	P:GO:0015976; F:GO:0004089; F:GO:0008270; F:GO:0016829	P:carbon utilization; F:carbonate dehydratase activity; F:zinc ion binding; F:lyase activity	COG0288@1|root,COG0288@2|Bacteria,1MV1U@1224|Proteobacteria,2WEBX@28216|Betaproteobacteria,1K53I@119060|Burkholderiaceae	P	Reversible hydration of carbon dioxide	K01673	cynT, can; carbonic anhydrase	[EC:4.2.1.1]	Nitrogen metabolism	Energy metabolism	Metabolism	PF00484	Carbonic anhydrase	-	4.2.1.-	-	1
NZ_CP052867	chromosome	chromosome:1	HJC54_RS13760	231301	231616	+	N	CDS	hypothetical protein
NZ_CP052867	chromosome	chromosome:1	HJC54_RS13765	231615	232842	+	N	CDS	beta-ketoacyl-[acyl-carrier-protein] synthase family protein	7	P:GO:0006629; P:GO:0006631; P:GO:0006633; F:GO:0004315; F:GO:0016740; F:GO:0016746; F:GO:0016747	P:lipid metabolic process; P:fatty acid metabolic process; P:fatty acid biosynthetic process; F:3-oxoacyl-[acyl-carrier-protein] synthase activity; F:transferase activity; F:acyltransferase activity; F:acyltransferase activity, transferring groups other than amino-acyl groups	COG0304@1|root,COG0304@2|Bacteria,1MV30@1224|Proteobacteria,2VI0P@28216|Betaproteobacteria,1KDJQ@119060|Burkholderiaceae	H	Beta-ketoacyl synthase, C-terminal domain	K09458	fabF, OXSM, CEM1; 3-oxoacyl-[acyl-carrier-protein] synthase II	[EC:2.3.1.179]	Fatty acid biosynthesis	Lipid metabolism	Metabolism	PF02801	Beta-ketoacyl synthase, C-terminal domain
NZ_CP052867	chromosome	chromosome:1	HJC54_RS13765	231615	232842	+	N	CDS	beta-ketoacyl-[acyl-carrier-protein] synthase family protein	7	P:GO:0006629; P:GO:0006631; P:GO:0006633; F:GO:0004315; F:GO:0016740; F:GO:0016746; F:GO:0016747	P:lipid metabolic process; P:fatty acid metabolic process; P:fatty acid biosynthetic process; F:3-oxoacyl-[acyl-carrier-protein] synthase activity; F:transferase activity; F:acyltransferase activity; F:acyltransferase activity, transferring groups other than amino-acyl groups	COG0304@1|root,COG0304@2|Bacteria,1MV30@1224|Proteobacteria,2VI0P@28216|Betaproteobacteria,1KDJQ@119060|Burkholderiaceae	H	Beta-ketoacyl synthase, C-terminal domain	K09458	fabF, OXSM, CEM1; 3-oxoacyl-[acyl-carrier-protein] synthase II	[EC:2.3.1.179]	Fatty acid biosynthesis	Lipid metabolism	Metabolism	PF00109	Beta-ketoacyl synthase, N-terminal domain
NZ_CP052867	chromosome	chromosome:1	HJC54_RS13765	231615	232842	+	N	CDS	beta-ketoacyl-[acyl-carrier-protein] synthase family protein	7	P:GO:0006629; P:GO:0006631; P:GO:0006633; F:GO:0004315; F:GO:0016740; F:GO:0016746; F:GO:0016747	P:lipid metabolic process; P:fatty acid metabolic process; P:fatty acid biosynthetic process; F:3-oxoacyl-[acyl-carrier-protein] synthase activity; F:transferase activity; F:acyltransferase activity; F:acyltransferase activity, transferring groups other than amino-acyl groups	COG0304@1|root,COG0304@2|Bacteria,1MV30@1224|Proteobacteria,2VI0P@28216|Betaproteobacteria,1KDJQ@119060|Burkholderiaceae	H	Beta-ketoacyl synthase, C-terminal domain	K09458	fabF, OXSM, CEM1; 3-oxoacyl-[acyl-carrier-protein] synthase II	[EC:2.3.1.179]	Biotin metabolism	Metabolism of cofactors and vitamins	Metabolism	PF02801	Beta-ketoacyl synthase, C-terminal domain
NZ_CP052867	chromosome	chromosome:1	HJC54_RS13765	231615	232842	+	N	CDS	beta-ketoacyl-[acyl-carrier-protein] synthase family protein	7	P:GO:0006629; P:GO:0006631; P:GO:0006633; F:GO:0004315; F:GO:0016740; F:GO:0016746; F:GO:0016747	P:lipid metabolic process; P:fatty acid metabolic process; P:fatty acid biosynthetic process; F:3-oxoacyl-[acyl-carrier-protein] synthase activity; F:transferase activity; F:acyltransferase activity; F:acyltransferase activity, transferring groups other than amino-acyl groups	COG0304@1|root,COG0304@2|Bacteria,1MV30@1224|Proteobacteria,2VI0P@28216|Betaproteobacteria,1KDJQ@119060|Burkholderiaceae	H	Beta-ketoacyl synthase, C-terminal domain	K09458	fabF, OXSM, CEM1; 3-oxoacyl-[acyl-carrier-protein] synthase II	[EC:2.3.1.179]	Biotin metabolism	Metabolism of cofactors and vitamins	Metabolism	PF00109	Beta-ketoacyl synthase, N-terminal domain
NZ_CP052867	chromosome	chromosome:1	HJC54_RS13770	233121	235386	+	N	CDS	hypothetical protein	11	P:GO:0000160; P:GO:0007165; P:GO:0016310; P:GO:0018106; F:GO:0000155; F:GO:0004673; F:GO:0016301; F:GO:0016740; F:GO:0016772; C:GO:0016020; C:GO:0016021	P:phosphorelay signal transduction system; P:signal transduction; P:phosphorylation; P:peptidyl-histidine phosphorylation; F:phosphorelay sensor kinase activity; F:protein histidine kinase activity; F:kinase activity; F:transferase activity; F:transferase activity, transferring phosphorus-containing groups; C:membrane; C:integral component of membrane	COG0642@1|root,COG2205@2|Bacteria,1R93B@1224|Proteobacteria,2VPEV@28216|Betaproteobacteria,1KHUF@119060|Burkholderiaceae	T	histidine kinase A domain protein	K07677	rcsC; two-component system, NarL family, capsular synthesis sensor histidine kinase RcsC	[EC:2.7.13.3]	Two-component system	Signal transduction	Environmental Information Processing	PF00512	His Kinase A (phospho-acceptor) domain
NZ_CP052867	chromosome	chromosome:1	HJC54_RS13770	233121	235386	+	N	CDS	hypothetical protein	11	P:GO:0000160; P:GO:0007165; P:GO:0016310; P:GO:0018106; F:GO:0000155; F:GO:0004673; F:GO:0016301; F:GO:0016740; F:GO:0016772; C:GO:0016020; C:GO:0016021	P:phosphorelay signal transduction system; P:signal transduction; P:phosphorylation; P:peptidyl-histidine phosphorylation; F:phosphorelay sensor kinase activity; F:protein histidine kinase activity; F:kinase activity; F:transferase activity; F:transferase activity, transferring phosphorus-containing groups; C:membrane; C:integral component of membrane	COG0642@1|root,COG2205@2|Bacteria,1R93B@1224|Proteobacteria,2VPEV@28216|Betaproteobacteria,1KHUF@119060|Burkholderiaceae	T	histidine kinase A domain protein	K07677	rcsC; two-component system, NarL family, capsular synthesis sensor histidine kinase RcsC	[EC:2.7.13.3]	Two-component system	Signal transduction	Environmental Information Processing	PF02518	Histidine kinase-, DNA gyrase B-, and HSP90-like ATPase
NZ_CP052867	chromosome	chromosome:1	HJC54_RS13770	233121	235386	+	N	CDS	hypothetical protein	11	P:GO:0000160; P:GO:0007165; P:GO:0016310; P:GO:0018106; F:GO:0000155; F:GO:0004673; F:GO:0016301; F:GO:0016740; F:GO:0016772; C:GO:0016020; C:GO:0016021	P:phosphorelay signal transduction system; P:signal transduction; P:phosphorylation; P:peptidyl-histidine phosphorylation; F:phosphorelay sensor kinase activity; F:protein histidine kinase activity; F:kinase activity; F:transferase activity; F:transferase activity, transferring phosphorus-containing groups; C:membrane; C:integral component of membrane	COG0642@1|root,COG2205@2|Bacteria,1R93B@1224|Proteobacteria,2VPEV@28216|Betaproteobacteria,1KHUF@119060|Burkholderiaceae	T	histidine kinase A domain protein	K07677	rcsC; two-component system, NarL family, capsular synthesis sensor histidine kinase RcsC	[EC:2.7.13.3]	Biofilm formation - Escherichia coli	Cellular community - prokaryotes	Cellular Processes	PF00512	His Kinase A (phospho-acceptor) domain
NZ_CP052867	chromosome	chromosome:1	HJC54_RS13770	233121	235386	+	N	CDS	hypothetical protein	11	P:GO:0000160; P:GO:0007165; P:GO:0016310; P:GO:0018106; F:GO:0000155; F:GO:0004673; F:GO:0016301; F:GO:0016740; F:GO:0016772; C:GO:0016020; C:GO:0016021	P:phosphorelay signal transduction system; P:signal transduction; P:phosphorylation; P:peptidyl-histidine phosphorylation; F:phosphorelay sensor kinase activity; F:protein histidine kinase activity; F:kinase activity; F:transferase activity; F:transferase activity, transferring phosphorus-containing groups; C:membrane; C:integral component of membrane	COG0642@1|root,COG2205@2|Bacteria,1R93B@1224|Proteobacteria,2VPEV@28216|Betaproteobacteria,1KHUF@119060|Burkholderiaceae	T	histidine kinase A domain protein	K07677	rcsC; two-component system, NarL family, capsular synthesis sensor histidine kinase RcsC	[EC:2.7.13.3]	Biofilm formation - Escherichia coli	Cellular community - prokaryotes	Cellular Processes	PF02518	Histidine kinase-, DNA gyrase B-, and HSP90-like ATPase
NZ_CP052867	chromosome	chromosome:1	HJC54_RS13775	235295	236528	+	N	CDS	response regulator	11	P:GO:0000160; P:GO:0007165; P:GO:0016310; P:GO:0018106; F:GO:0000155; F:GO:0004673; F:GO:0016301; F:GO:0016740; F:GO:0016772; C:GO:0016020; C:GO:0016021	P:phosphorelay signal transduction system; P:signal transduction; P:phosphorylation; P:peptidyl-histidine phosphorylation; F:phosphorelay sensor kinase activity; F:protein histidine kinase activity; F:kinase activity; F:transferase activity; F:transferase activity, transferring phosphorus-containing groups; C:membrane; C:integral component of membrane	COG0642@1|root,COG2205@2|Bacteria,1R93B@1224|Proteobacteria,2VPEV@28216|Betaproteobacteria,1KHUF@119060|Burkholderiaceae	T	histidine kinase A domain protein							PF00072	Response regulator receiver domain
NZ_CP052867	chromosome	chromosome:1	HJC54_RS13780	236582	237239	-	N	CDS	response regulator transcription factor	3	P:GO:0000160; P:GO:0006355; F:GO:0003677	P:phosphorelay signal transduction system; P:regulation of transcription, DNA-templated; F:DNA binding	COG2197@1|root,COG2197@2|Bacteria,1NUBI@1224|Proteobacteria,2W1ZH@28216|Betaproteobacteria,1K8A3@119060|Burkholderiaceae	K	regulator	K07687	rcsB; two-component system, NarL family, captular synthesis response regulator RcsB		Two-component system	Signal transduction	Environmental Information Processing	PF00196	Bacterial regulatory proteins, luxR family
NZ_CP052867	chromosome	chromosome:1	HJC54_RS13780	236582	237239	-	N	CDS	response regulator transcription factor	3	P:GO:0000160; P:GO:0006355; F:GO:0003677	P:phosphorelay signal transduction system; P:regulation of transcription, DNA-templated; F:DNA binding	COG2197@1|root,COG2197@2|Bacteria,1NUBI@1224|Proteobacteria,2W1ZH@28216|Betaproteobacteria,1K8A3@119060|Burkholderiaceae	K	regulator	K07687	rcsB; two-component system, NarL family, captular synthesis response regulator RcsB		Two-component system	Signal transduction	Environmental Information Processing	PF00072	Response regulator receiver domain
NZ_CP052867	chromosome	chromosome:1	HJC54_RS13780	236582	237239	-	N	CDS	response regulator transcription factor	3	P:GO:0000160; P:GO:0006355; F:GO:0003677	P:phosphorelay signal transduction system; P:regulation of transcription, DNA-templated; F:DNA binding	COG2197@1|root,COG2197@2|Bacteria,1NUBI@1224|Proteobacteria,2W1ZH@28216|Betaproteobacteria,1K8A3@119060|Burkholderiaceae	K	regulator	K07687	rcsB; two-component system, NarL family, captular synthesis response regulator RcsB		Biofilm formation - Escherichia coli	Cellular community - prokaryotes	Cellular Processes	PF00196	Bacterial regulatory proteins, luxR family
NZ_CP052867	chromosome	chromosome:1	HJC54_RS13780	236582	237239	-	N	CDS	response regulator transcription factor	3	P:GO:0000160; P:GO:0006355; F:GO:0003677	P:phosphorelay signal transduction system; P:regulation of transcription, DNA-templated; F:DNA binding	COG2197@1|root,COG2197@2|Bacteria,1NUBI@1224|Proteobacteria,2W1ZH@28216|Betaproteobacteria,1K8A3@119060|Burkholderiaceae	K	regulator	K07687	rcsB; two-component system, NarL family, captular synthesis response regulator RcsB		Biofilm formation - Escherichia coli	Cellular community - prokaryotes	Cellular Processes	PF00072	Response regulator receiver domain
NZ_CP052867	chromosome	chromosome:1	HJC54_RS13785	237372	238326	-	N	CDS	fimbrial protein	2	P:GO:0007155; C:GO:0009289	P:cell adhesion; C:pilus	COG3539@1|root,COG3539@2|Bacteria,1N7VK@1224|Proteobacteria,2VSS7@28216|Betaproteobacteria,1KB6B@119060|Burkholderiaceae	NU	Fimbrial protein							PF00419	Fimbrial protein
NZ_CP052867	chromosome	chromosome:1	HJC54_RS13790	238322	240842	-	N	CDS	fimbrial biogenesis outer membrane usher protein	6	P:GO:0009297; P:GO:0055085; F:GO:0015473; C:GO:0009279; C:GO:0016020; C:GO:0016021	P:pilus assembly; P:transmembrane transport; F:fimbrial usher porin activity; C:cell outer membrane; C:membrane; C:integral component of membrane	COG3188@1|root,COG3188@2|Bacteria,1MUHE@1224|Proteobacteria,2VHTC@28216|Betaproteobacteria,1K27E@119060|Burkholderiaceae	NU	Fimbrial biogenesis outer membrane usher protein	K07347	fimD, fimC, mrkC, htrE, cssD; outer membrane usher protein		Pertussis	Infectious disease: bacterial	Human Diseases	PF13953	PapC C-terminal domain
NZ_CP052867	chromosome	chromosome:1	HJC54_RS13790	238322	240842	-	N	CDS	fimbrial biogenesis outer membrane usher protein	6	P:GO:0009297; P:GO:0055085; F:GO:0015473; C:GO:0009279; C:GO:0016020; C:GO:0016021	P:pilus assembly; P:transmembrane transport; F:fimbrial usher porin activity; C:cell outer membrane; C:membrane; C:integral component of membrane	COG3188@1|root,COG3188@2|Bacteria,1MUHE@1224|Proteobacteria,2VHTC@28216|Betaproteobacteria,1K27E@119060|Burkholderiaceae	NU	Fimbrial biogenesis outer membrane usher protein	K07347	fimD, fimC, mrkC, htrE, cssD; outer membrane usher protein		Pertussis	Infectious disease: bacterial	Human Diseases	PF00577	Outer membrane usher protein
NZ_CP052867	chromosome	chromosome:1	HJC54_RS13790	238322	240842	-	N	CDS	fimbrial biogenesis outer membrane usher protein	6	P:GO:0009297; P:GO:0055085; F:GO:0015473; C:GO:0009279; C:GO:0016020; C:GO:0016021	P:pilus assembly; P:transmembrane transport; F:fimbrial usher porin activity; C:cell outer membrane; C:membrane; C:integral component of membrane	COG3188@1|root,COG3188@2|Bacteria,1MUHE@1224|Proteobacteria,2VHTC@28216|Betaproteobacteria,1K27E@119060|Burkholderiaceae	NU	Fimbrial biogenesis outer membrane usher protein	K07347	fimD, fimC, mrkC, htrE, cssD; outer membrane usher protein		Pertussis	Infectious disease: bacterial	Human Diseases	PF13954	PapC N-terminal domain
NZ_CP052867	chromosome	chromosome:1	HJC54_RS13795	240753	241494	-	N	CDS	molecular chaperone	4	P:GO:0061077; P:GO:0071555; C:GO:0030288; C:GO:0042597	P:chaperone-mediated protein folding; P:cell wall organization; C:outer membrane-bounded periplasmic space; C:periplasmic space	COG3121@1|root,COG3121@2|Bacteria,1R5FY@1224|Proteobacteria,2VPZA@28216|Betaproteobacteria	M	P pilus assembly protein chaperone PapD							PF00345	Pili and flagellar-assembly chaperone, PapD N-terminal domain
NZ_CP052867	chromosome	chromosome:1	HJC54_RS13795	240753	241494	-	N	CDS	molecular chaperone	4	P:GO:0061077; P:GO:0071555; C:GO:0030288; C:GO:0042597	P:chaperone-mediated protein folding; P:cell wall organization; C:outer membrane-bounded periplasmic space; C:periplasmic space	COG3121@1|root,COG3121@2|Bacteria,1R5FY@1224|Proteobacteria,2VPZA@28216|Betaproteobacteria	M	P pilus assembly protein chaperone PapD							PF02753	Pili assembly chaperone PapD, C-terminal domain
NZ_CP052867	chromosome	chromosome:1	HJC54_RS13800	241501	242428	-	N	CDS	type 1 fimbrial protein	2	P:GO:0007155; C:GO:0009289	P:cell adhesion; C:pilus	COG3539@1|root,COG3539@2|Bacteria,1RC0B@1224|Proteobacteria,2WG82@28216|Betaproteobacteria,1KIBD@119060|Burkholderiaceae	NU	Fimbrial protein	K07345	fimA; major type 1 subunit fimbrin (pilin)		Shigellosis	Infectious disease: bacterial	Human Diseases	PF00419	Fimbrial protein
NZ_CP052867	chromosome	chromosome:1	HJC54_RS13800	241501	242428	-	N	CDS	type 1 fimbrial protein	2	P:GO:0007155; C:GO:0009289	P:cell adhesion; C:pilus	COG3539@1|root,COG3539@2|Bacteria,1RC0B@1224|Proteobacteria,2WG82@28216|Betaproteobacteria,1KIBD@119060|Burkholderiaceae	NU	Fimbrial protein	K07345	fimA; major type 1 subunit fimbrin (pilin)		Pertussis	Infectious disease: bacterial	Human Diseases	PF00419	Fimbrial protein
NZ_CP052867	chromosome	chromosome:1	HJC54_RS13805	243275	243440	+	N	CDS	hypothetical protein
NZ_CP052867	chromosome	chromosome:1	HJC54_RS13825	247727	248498	+	N	CDS	SDR family oxidoreductase	1	F:GO:0016491	F:oxidoreductase activity	COG1028@1|root,COG1028@2|Bacteria,1MWZE@1224|Proteobacteria,2VJFB@28216|Betaproteobacteria,1K3DM@119060|Burkholderiaceae	IQ	Short-chain dehydrogenase reductase sdr							PF00106	short chain dehydrogenase
NZ_CP052867	chromosome	chromosome:1	HJC54_RS13830	248595	248991	-	N	CDS	tautomerase family protein	1	F:GO:0016853	F:isomerase activity	COG1942@1|root,COG1942@2|Bacteria,1RHA5@1224|Proteobacteria,2VRNS@28216|Betaproteobacteria,1K8KX@119060|Burkholderiaceae	S	4-oxalocrotonate tautomerase	K01821	praC, xylH; 4-oxalocrotonate tautomerase	[EC:5.3.2.6]	Benzoate degradation	Xenobiotics biodegradation and metabolism	Metabolism	PF14552	Tautomerase enzyme
NZ_CP052867	chromosome	chromosome:1	HJC54_RS13830	248595	248991	-	N	CDS	tautomerase family protein	1	F:GO:0016853	F:isomerase activity	COG1942@1|root,COG1942@2|Bacteria,1RHA5@1224|Proteobacteria,2VRNS@28216|Betaproteobacteria,1K8KX@119060|Burkholderiaceae	S	4-oxalocrotonate tautomerase	K01821	praC, xylH; 4-oxalocrotonate tautomerase	[EC:5.3.2.6]	Xylene degradation	Xenobiotics biodegradation and metabolism	Metabolism	PF14552	Tautomerase enzyme
NZ_CP052867	chromosome	chromosome:1	HJC54_RS13830	248595	248991	-	N	CDS	tautomerase family protein	1	F:GO:0016853	F:isomerase activity	COG1942@1|root,COG1942@2|Bacteria,1RHA5@1224|Proteobacteria,2VRNS@28216|Betaproteobacteria,1K8KX@119060|Burkholderiaceae	S	4-oxalocrotonate tautomerase	K01821	praC, xylH; 4-oxalocrotonate tautomerase	[EC:5.3.2.6]	Dioxin degradation	Xenobiotics biodegradation and metabolism	Metabolism	PF14552	Tautomerase enzyme
NZ_CP052867	chromosome	chromosome:1	HJC54_RS13835	249016	249166	+	N	CDS	hypothetical protein
NZ_CP052867	chromosome	chromosome:1	HJC54_RS13840	249165	250071	+	N	CDS	LysR family transcriptional regulator	2	P:GO:0006355; F:GO:0003700	P:regulation of transcription, DNA-templated; F:DNA-binding transcription factor activity	COG0583@1|root,COG0583@2|Bacteria,1R49T@1224|Proteobacteria,2VK85@28216|Betaproteobacteria,1K4XP@119060|Burkholderiaceae	K	Transcriptional regulator							PF03466	LysR substrate binding domain
NZ_CP052867	chromosome	chromosome:1	HJC54_RS13840	249165	250071	+	N	CDS	LysR family transcriptional regulator	2	P:GO:0006355; F:GO:0003700	P:regulation of transcription, DNA-templated; F:DNA-binding transcription factor activity	COG0583@1|root,COG0583@2|Bacteria,1R49T@1224|Proteobacteria,2VK85@28216|Betaproteobacteria,1K4XP@119060|Burkholderiaceae	K	Transcriptional regulator							PF00126	Bacterial regulatory helix-turn-helix protein, lysR family
NZ_CP052867	chromosome	chromosome:1	HJC54_RS13845	250488	251633	-	Y	CDS	glycosyltransferase family 9 protein
NZ_CP052867	chromosome	chromosome:1	HJC54_RS13850	251820	252384	-	N	CDS	SDR family oxidoreductase	1	F:GO:0016491	F:oxidoreductase activity	COG1028@1|root,COG1028@2|Bacteria,1MW9A@1224|Proteobacteria,2VH0E@28216|Betaproteobacteria,1K07B@119060|Burkholderiaceae	IQ	Short-chain dehydrogenase reductase sdr							PF00106	short chain dehydrogenase
NZ_CP052867	chromosome	chromosome:1	HJC54_RS13855	252694	254224	-	N	CDS	response regulator	10	P:GO:0000160; P:GO:0007165; P:GO:0016310; P:GO:0018106; F:GO:0000155; F:GO:0004673; F:GO:0016301; F:GO:0016740; F:GO:0016772; F:GO:0016787	P:phosphorelay signal transduction system; P:signal transduction; P:phosphorylation; P:peptidyl-histidine phosphorylation; F:phosphorelay sensor kinase activity; F:protein histidine kinase activity; F:kinase activity; F:transferase activity; F:transferase activity, transferring phosphorus-containing groups; F:hydrolase activity	COG0642@1|root,COG0745@1|root,COG0745@2|Bacteria,COG2205@2|Bacteria,1NRP8@1224|Proteobacteria,2VIZX@28216|Betaproteobacteria,1KIJ5@119060|Burkholderiaceae	T	Histidine kinase							PF00072	Response regulator receiver domain
NZ_CP052867	chromosome	chromosome:1	HJC54_RS13855	252694	254224	-	N	CDS	response regulator	10	P:GO:0000160; P:GO:0007165; P:GO:0016310; P:GO:0018106; F:GO:0000155; F:GO:0004673; F:GO:0016301; F:GO:0016740; F:GO:0016772; F:GO:0016787	P:phosphorelay signal transduction system; P:signal transduction; P:phosphorylation; P:peptidyl-histidine phosphorylation; F:phosphorelay sensor kinase activity; F:protein histidine kinase activity; F:kinase activity; F:transferase activity; F:transferase activity, transferring phosphorus-containing groups; F:hydrolase activity	COG0642@1|root,COG0745@1|root,COG0745@2|Bacteria,COG2205@2|Bacteria,1NRP8@1224|Proteobacteria,2VIZX@28216|Betaproteobacteria,1KIJ5@119060|Burkholderiaceae	T	Histidine kinase							PF00512	His Kinase A (phospho-acceptor) domain
NZ_CP052867	chromosome	chromosome:1	HJC54_RS13855	252694	254224	-	N	CDS	response regulator	10	P:GO:0000160; P:GO:0007165; P:GO:0016310; P:GO:0018106; F:GO:0000155; F:GO:0004673; F:GO:0016301; F:GO:0016740; F:GO:0016772; F:GO:0016787	P:phosphorelay signal transduction system; P:signal transduction; P:phosphorylation; P:peptidyl-histidine phosphorylation; F:phosphorelay sensor kinase activity; F:protein histidine kinase activity; F:kinase activity; F:transferase activity; F:transferase activity, transferring phosphorus-containing groups; F:hydrolase activity	COG0642@1|root,COG0745@1|root,COG0745@2|Bacteria,COG2205@2|Bacteria,1NRP8@1224|Proteobacteria,2VIZX@28216|Betaproteobacteria,1KIJ5@119060|Burkholderiaceae	T	Histidine kinase							PF02518	Histidine kinase-, DNA gyrase B-, and HSP90-like ATPase
NZ_CP052867	chromosome	chromosome:1	HJC54_RS13860	254211	255714	-	N	CDS	ATP-binding protein	16	P:GO:0000160; P:GO:0006464; P:GO:0007165; P:GO:0016310; P:GO:0018106; P:GO:1902531; F:GO:0000155; F:GO:0000166; F:GO:0004673; F:GO:0005524; F:GO:0016301; F:GO:0016740; F:GO:0016772; C:GO:0005737; C:GO:0016020; C:GO:0016021	P:phosphorelay signal transduction system; P:cellular protein modification process; P:signal transduction; P:phosphorylation; P:peptidyl-histidine phosphorylation; P:regulation of intracellular signal transduction; F:phosphorelay sensor kinase activity; F:nucleotide binding; F:protein histidine kinase activity; F:ATP binding; F:kinase activity; F:transferase activity; F:transferase activity, tran…	COG0642@1|root,COG2205@2|Bacteria,1R694@1224|Proteobacteria,2VHBV@28216|Betaproteobacteria,1KIJ4@119060|Burkholderiaceae	T	His Kinase A (phosphoacceptor) domain							PF02518	Histidine kinase-, DNA gyrase B-, and HSP90-like ATPase
NZ_CP052867	chromosome	chromosome:1	HJC54_RS13860	254211	255714	-	N	CDS	ATP-binding protein	16	P:GO:0000160; P:GO:0006464; P:GO:0007165; P:GO:0016310; P:GO:0018106; P:GO:1902531; F:GO:0000155; F:GO:0000166; F:GO:0004673; F:GO:0005524; F:GO:0016301; F:GO:0016740; F:GO:0016772; C:GO:0005737; C:GO:0016020; C:GO:0016021	P:phosphorelay signal transduction system; P:cellular protein modification process; P:signal transduction; P:phosphorylation; P:peptidyl-histidine phosphorylation; P:regulation of intracellular signal transduction; F:phosphorelay sensor kinase activity; F:nucleotide binding; F:protein histidine kinase activity; F:ATP binding; F:kinase activity; F:transferase activity; F:transferase activity, tran…	COG0642@1|root,COG2205@2|Bacteria,1R694@1224|Proteobacteria,2VHBV@28216|Betaproteobacteria,1KIJ4@119060|Burkholderiaceae	T	His Kinase A (phosphoacceptor) domain							PF13581	Histidine kinase-like ATPase domain
NZ_CP052867	chromosome	chromosome:1	HJC54_RS13860	254211	255714	-	N	CDS	ATP-binding protein	16	P:GO:0000160; P:GO:0006464; P:GO:0007165; P:GO:0016310; P:GO:0018106; P:GO:1902531; F:GO:0000155; F:GO:0000166; F:GO:0004673; F:GO:0005524; F:GO:0016301; F:GO:0016740; F:GO:0016772; C:GO:0005737; C:GO:0016020; C:GO:0016021	P:phosphorelay signal transduction system; P:cellular protein modification process; P:signal transduction; P:phosphorylation; P:peptidyl-histidine phosphorylation; P:regulation of intracellular signal transduction; F:phosphorelay sensor kinase activity; F:nucleotide binding; F:protein histidine kinase activity; F:ATP binding; F:kinase activity; F:transferase activity; F:transferase activity, tran…	COG0642@1|root,COG2205@2|Bacteria,1R694@1224|Proteobacteria,2VHBV@28216|Betaproteobacteria,1KIJ4@119060|Burkholderiaceae	T	His Kinase A (phosphoacceptor) domain							PF00512	His Kinase A (phospho-acceptor) domain
NZ_CP052867	chromosome	chromosome:1	HJC54_RS13865	255771	256911	-	N	CDS	ATP-binding protein	6	P:GO:0006468; P:GO:0016310; P:GO:0016311; F:GO:0004674; F:GO:0016301; F:GO:0016791	P:protein phosphorylation; P:phosphorylation; P:dephosphorylation; F:protein serine/threonine kinase activity; F:kinase activity; F:phosphatase activity	COG2172@1|root,COG2172@2|Bacteria,1QZNR@1224|Proteobacteria,2WHN2@28216|Betaproteobacteria,1KI7M@119060|Burkholderiaceae	T	Sigma factor PP2C-like phosphatases							PF07228	Stage II sporulation protein E (SpoIIE)
NZ_CP052867	chromosome	chromosome:1	HJC54_RS13865	255771	256911	-	N	CDS	ATP-binding protein	6	P:GO:0006468; P:GO:0016310; P:GO:0016311; F:GO:0004674; F:GO:0016301; F:GO:0016791	P:protein phosphorylation; P:phosphorylation; P:dephosphorylation; F:protein serine/threonine kinase activity; F:kinase activity; F:phosphatase activity	COG2172@1|root,COG2172@2|Bacteria,1QZNR@1224|Proteobacteria,2WHN2@28216|Betaproteobacteria,1KI7M@119060|Burkholderiaceae	T	Sigma factor PP2C-like phosphatases							PF13581	Histidine kinase-like ATPase domain
NZ_CP052867	chromosome	chromosome:1	HJC54_RS13885	258913	259129	-	N	CDS	FCD domain-containing protein				COG1802@1|root,COG1802@2|Bacteria,1MWG2@1224|Proteobacteria,2VQPZ@28216|Betaproteobacteria,1K64X@119060|Burkholderiaceae	K	FCD domain							PF07729	FCD domain
NZ_CP052867	chromosome	chromosome:1	HJC54_RS13890	259233	259692	-	N	CDS	GNAT family N-acetyltransferase	2	F:GO:0008080; F:GO:0016740	F:N-acetyltransferase activity; F:transferase activity	COG0454@1|root,COG0456@2|Bacteria,1PXXF@1224|Proteobacteria,2WD85@28216|Betaproteobacteria,1K9NW@119060|Burkholderiaceae	K	Acetyltransferase (GNAT) domain							PF00583	Acetyltransferase (GNAT) family
NZ_CP052867	chromosome	chromosome:1	HJC54_RS13895	259832	260495	+	N	CDS	GntR family transcriptional regulator	3	P:GO:0006355; F:GO:0003677; F:GO:0003700	P:regulation of transcription, DNA-templated; F:DNA binding; F:DNA-binding transcription factor activity	COG1802@1|root,COG1802@2|Bacteria,1R45T@1224|Proteobacteria,2W3KW@28216|Betaproteobacteria,1K55A@119060|Burkholderiaceae	K	FCD							PF07729	FCD domain
NZ_CP052867	chromosome	chromosome:1	HJC54_RS13895	259832	260495	+	N	CDS	GntR family transcriptional regulator	3	P:GO:0006355; F:GO:0003677; F:GO:0003700	P:regulation of transcription, DNA-templated; F:DNA binding; F:DNA-binding transcription factor activity	COG1802@1|root,COG1802@2|Bacteria,1R45T@1224|Proteobacteria,2W3KW@28216|Betaproteobacteria,1K55A@119060|Burkholderiaceae	K	FCD							PF00392	Bacterial regulatory proteins, gntR family
NZ_CP052867	chromosome	chromosome:1	HJC54_RS13900	260478	261726	+	N	CDS	dicarboxylate/amino acid:cation symporter	4	P:GO:0055085; F:GO:0015293; C:GO:0016020; C:GO:0016021	P:transmembrane transport; F:symporter activity; C:membrane; C:integral component of membrane	COG1301@1|root,COG1301@2|Bacteria,1MU0Q@1224|Proteobacteria,2W16D@28216|Betaproteobacteria,1K6BJ@119060|Burkholderiaceae	C	Belongs to the dicarboxylate amino acid cation symporter (DAACS) (TC 2.A.23) family	K03309	TC.DAACS; dicarboxylate/amino acid:cation (Na+ or H+) symporter, DAACS family		Transport	Unclassified: signaling and cellular processes	Not Included in Pathway or Brite	PF00375	Sodium:dicarboxylate symporter family
NZ_CP052867	chromosome	chromosome:1	HJC54_RS13905	262175	262928	+	N	CDS	autoinducer binding domain-containing protein	2	P:GO:0006355; F:GO:0003677	P:regulation of transcription, DNA-templated; F:DNA binding	COG2771@1|root,COG2771@2|Bacteria,1Q9RT@1224|Proteobacteria,2WCX4@28216|Betaproteobacteria,1KBUR@119060|Burkholderiaceae	K	Autoinducer binding domain							PF03472	Autoinducer binding domain
NZ_CP052867	chromosome	chromosome:1	HJC54_RS13905	262175	262928	+	N	CDS	autoinducer binding domain-containing protein	2	P:GO:0006355; F:GO:0003677	P:regulation of transcription, DNA-templated; F:DNA binding	COG2771@1|root,COG2771@2|Bacteria,1Q9RT@1224|Proteobacteria,2WCX4@28216|Betaproteobacteria,1KBUR@119060|Burkholderiaceae	K	Autoinducer binding domain							PF00196	Bacterial regulatory proteins, luxR family
NZ_CP052867	chromosome	chromosome:1	HJC54_RS13910	263393	263621	+	N	CDS	hypothetical protein
NZ_CP052867	chromosome	chromosome:1	HJC54_RS13915	263756	264083	+	N	CDS	hypothetical protein
NZ_CP052867	chromosome	chromosome:1	HJC54_RS13920	264669	267057	+	N	CDS	penicillin acylase family protein	4	P:GO:0017000; F:GO:0016787; F:GO:0016811; F:GO:0046872	P:antibiotic biosynthetic process; F:hydrolase activity; F:hydrolase activity, acting on carbon-nitrogen (but not peptide) bonds, in linear amides; F:metal ion binding	COG2366@1|root,COG2366@2|Bacteria,1MVMH@1224|Proteobacteria,2VIWI@28216|Betaproteobacteria,1K590@119060|Burkholderiaceae	S	penicillin amidase	K01434	pac; penicillin G amidase	[EC:3.5.1.11]	Penicillin and cephalosporin biosynthesis	Biosynthesis of other secondary metabolites	Metabolism	PF01804	Penicillin amidase
NZ_CP052867	chromosome	chromosome:1	HJC54_RS13925	267159	268332	-	N	CDS	alpha-hydroxy-acid oxidizing protein	4	F:GO:0003824; F:GO:0010181; F:GO:0016491; F:GO:0033720	F:catalytic activity; F:FMN binding; F:oxidoreductase activity; F:(S)-mandelate dehydrogenase activity	COG1304@1|root,COG1304@2|Bacteria,1MUEZ@1224|Proteobacteria,2VHZV@28216|Betaproteobacteria,1KGJP@119060|Burkholderiaceae	C	Dehydrogenase	K15054	mdlB; (S)-mandelate dehydrogenase	[EC:1.1.99.31]	Aminobenzoate degradation	Xenobiotics biodegradation and metabolism	Metabolism	PF01070	FMN-dependent dehydrogenase
NZ_CP052867	chromosome	chromosome:1	HJC54_RS13930	268676	269246	+	N	CDS	VOC family protein	5	P:GO:0009072; F:GO:0003868; F:GO:0016491; F:GO:0016701; F:GO:0051213	P:aromatic amino acid family metabolic process; F:4-hydroxyphenylpyruvate dioxygenase activity; F:oxidoreductase activity; F:oxidoreductase activity, acting on single donors with incorporation of molecular oxygen; F:dioxygenase activity	COG3185@1|root,COG3185@2|Bacteria,1PIEQ@1224|Proteobacteria,2W72F@28216|Betaproteobacteria,1KDKZ@119060|Burkholderiaceae	E	Glyoxalase-like domain	K05606	MCEE, epi; methylmalonyl-CoA/ethylmalonyl-CoA epimerase	[EC:5.1.99.1]	Glyoxylate and dicarboxylate metabolism	Carbohydrate metabolism	Metabolism	PF00903	Glyoxalase/Bleomycin resistance protein/Dioxygenase superfamily
NZ_CP052867	chromosome	chromosome:1	HJC54_RS13930	268676	269246	+	N	CDS	VOC family protein	5	P:GO:0009072; F:GO:0003868; F:GO:0016491; F:GO:0016701; F:GO:0051213	P:aromatic amino acid family metabolic process; F:4-hydroxyphenylpyruvate dioxygenase activity; F:oxidoreductase activity; F:oxidoreductase activity, acting on single donors with incorporation of molecular oxygen; F:dioxygenase activity	COG3185@1|root,COG3185@2|Bacteria,1PIEQ@1224|Proteobacteria,2W72F@28216|Betaproteobacteria,1KDKZ@119060|Burkholderiaceae	E	Glyoxalase-like domain	K05606	MCEE, epi; methylmalonyl-CoA/ethylmalonyl-CoA epimerase	[EC:5.1.99.1]	Propanoate metabolism	Carbohydrate metabolism	Metabolism	PF00903	Glyoxalase/Bleomycin resistance protein/Dioxygenase superfamily
NZ_CP052867	chromosome	chromosome:1	HJC54_RS13930	268676	269246	+	N	CDS	VOC family protein	5	P:GO:0009072; F:GO:0003868; F:GO:0016491; F:GO:0016701; F:GO:0051213	P:aromatic amino acid family metabolic process; F:4-hydroxyphenylpyruvate dioxygenase activity; F:oxidoreductase activity; F:oxidoreductase activity, acting on single donors with incorporation of molecular oxygen; F:dioxygenase activity	COG3185@1|root,COG3185@2|Bacteria,1PIEQ@1224|Proteobacteria,2W72F@28216|Betaproteobacteria,1KDKZ@119060|Burkholderiaceae	E	Glyoxalase-like domain	K05606	MCEE, epi; methylmalonyl-CoA/ethylmalonyl-CoA epimerase	[EC:5.1.99.1]	Carbon fixation pathways in prokaryotes	Energy metabolism	Metabolism	PF00903	Glyoxalase/Bleomycin resistance protein/Dioxygenase superfamily
NZ_CP052867	chromosome	chromosome:1	HJC54_RS13930	268676	269246	+	N	CDS	VOC family protein	5	P:GO:0009072; F:GO:0003868; F:GO:0016491; F:GO:0016701; F:GO:0051213	P:aromatic amino acid family metabolic process; F:4-hydroxyphenylpyruvate dioxygenase activity; F:oxidoreductase activity; F:oxidoreductase activity, acting on single donors with incorporation of molecular oxygen; F:dioxygenase activity	COG3185@1|root,COG3185@2|Bacteria,1PIEQ@1224|Proteobacteria,2W72F@28216|Betaproteobacteria,1KDKZ@119060|Burkholderiaceae	E	Glyoxalase-like domain	K05606	MCEE, epi; methylmalonyl-CoA/ethylmalonyl-CoA epimerase	[EC:5.1.99.1]	Valine, leucine and isoleucine degradation	Amino acid metabolism	Metabolism	PF00903	Glyoxalase/Bleomycin resistance protein/Dioxygenase superfamily
NZ_CP052867	chromosome	chromosome:1	HJC54_RS13935	269302	270583	+	N	CDS	PLP-dependent aminotransferase family protein	5	P:GO:0009058; F:GO:0003824; F:GO:0008483; F:GO:0016740; F:GO:0030170	P:biosynthetic process; F:catalytic activity; F:transaminase activity; F:transferase activity; F:pyridoxal phosphate binding	COG1167@1|root,COG1167@2|Bacteria,1RBXX@1224|Proteobacteria,2VZBH@28216|Betaproteobacteria,1KBZI@119060|Burkholderiaceae	K	Aminotransferase class I and II	K16423	hpgT, nocG; (S)-3,5-dihydroxyphenylglycine transaminase	[EC:2.6.1.103]	Biosynthesis of vancomycin group antibiotics	Metabolism of terpenoids and polyketides	Metabolism	PF00155	Aminotransferase class I and II
NZ_CP052867	chromosome	chromosome:1	HJC54_RS13935	269302	270583	+	N	CDS	PLP-dependent aminotransferase family protein	5	P:GO:0009058; F:GO:0003824; F:GO:0008483; F:GO:0016740; F:GO:0030170	P:biosynthetic process; F:catalytic activity; F:transaminase activity; F:transferase activity; F:pyridoxal phosphate binding	COG1167@1|root,COG1167@2|Bacteria,1RBXX@1224|Proteobacteria,2VZBH@28216|Betaproteobacteria,1KBZI@119060|Burkholderiaceae	K	Aminotransferase class I and II	K16423	hpgT, nocG; (S)-3,5-dihydroxyphenylglycine transaminase	[EC:2.6.1.103]	Monobactam biosynthesis	Biosynthesis of other secondary metabolites	Metabolism	PF00155	Aminotransferase class I and II
NZ_CP052867	chromosome	chromosome:1	HJC54_RS13940	270686	270884	-	N	CDS	hypothetical protein
NZ_CP052867	chromosome	chromosome:1	HJC54_RS13945	270969	272508	+	N	CDS	catalase	8	P:GO:0006979; P:GO:0042744; P:GO:0098869; F:GO:0004096; F:GO:0004601; F:GO:0016491; F:GO:0020037; F:GO:0046872	P:response to oxidative stress; P:hydrogen peroxide catabolic process; P:cellular oxidant detoxification; F:catalase activity; F:peroxidase activity; F:oxidoreductase activity; F:heme binding; F:metal ion binding	COG0753@1|root,COG0753@2|Bacteria,1MUXZ@1224|Proteobacteria,2VGZA@28216|Betaproteobacteria,1K03A@119060|Burkholderiaceae	C	Belongs to the catalase family	K03781	katE, CAT, catB, srpA; catalase	[EC:1.11.1.6]	Glyoxylate and dicarboxylate metabolism	Carbohydrate metabolism	Metabolism	PF06628	Catalase-related immune-responsive	-	1.11.1.-	-	1
NZ_CP052867	chromosome	chromosome:1	HJC54_RS13945	270969	272508	+	N	CDS	catalase	8	P:GO:0006979; P:GO:0042744; P:GO:0098869; F:GO:0004096; F:GO:0004601; F:GO:0016491; F:GO:0020037; F:GO:0046872	P:response to oxidative stress; P:hydrogen peroxide catabolic process; P:cellular oxidant detoxification; F:catalase activity; F:peroxidase activity; F:oxidoreductase activity; F:heme binding; F:metal ion binding	COG0753@1|root,COG0753@2|Bacteria,1MUXZ@1224|Proteobacteria,2VGZA@28216|Betaproteobacteria,1K03A@119060|Burkholderiaceae	C	Belongs to the catalase family	K03781	katE, CAT, catB, srpA; catalase	[EC:1.11.1.6]	Glyoxylate and dicarboxylate metabolism	Carbohydrate metabolism	Metabolism	PF00199	Catalase	-	1.11.1.-	-	1
NZ_CP052867	chromosome	chromosome:1	HJC54_RS13945	270969	272508	+	N	CDS	catalase	8	P:GO:0006979; P:GO:0042744; P:GO:0098869; F:GO:0004096; F:GO:0004601; F:GO:0016491; F:GO:0020037; F:GO:0046872	P:response to oxidative stress; P:hydrogen peroxide catabolic process; P:cellular oxidant detoxification; F:catalase activity; F:peroxidase activity; F:oxidoreductase activity; F:heme binding; F:metal ion binding	COG0753@1|root,COG0753@2|Bacteria,1MUXZ@1224|Proteobacteria,2VGZA@28216|Betaproteobacteria,1K03A@119060|Burkholderiaceae	C	Belongs to the catalase family	K03781	katE, CAT, catB, srpA; catalase	[EC:1.11.1.6]	Tryptophan metabolism	Amino acid metabolism	Metabolism	PF06628	Catalase-related immune-responsive	-	1.11.1.-	-	1
NZ_CP052867	chromosome	chromosome:1	HJC54_RS13945	270969	272508	+	N	CDS	catalase	8	P:GO:0006979; P:GO:0042744; P:GO:0098869; F:GO:0004096; F:GO:0004601; F:GO:0016491; F:GO:0020037; F:GO:0046872	P:response to oxidative stress; P:hydrogen peroxide catabolic process; P:cellular oxidant detoxification; F:catalase activity; F:peroxidase activity; F:oxidoreductase activity; F:heme binding; F:metal ion binding	COG0753@1|root,COG0753@2|Bacteria,1MUXZ@1224|Proteobacteria,2VGZA@28216|Betaproteobacteria,1K03A@119060|Burkholderiaceae	C	Belongs to the catalase family	K03781	katE, CAT, catB, srpA; catalase	[EC:1.11.1.6]	Tryptophan metabolism	Amino acid metabolism	Metabolism	PF00199	Catalase	-	1.11.1.-	-	1
NZ_CP052867	chromosome	chromosome:1	HJC54_RS13945	270969	272508	+	N	CDS	catalase	8	P:GO:0006979; P:GO:0042744; P:GO:0098869; F:GO:0004096; F:GO:0004601; F:GO:0016491; F:GO:0020037; F:GO:0046872	P:response to oxidative stress; P:hydrogen peroxide catabolic process; P:cellular oxidant detoxification; F:catalase activity; F:peroxidase activity; F:oxidoreductase activity; F:heme binding; F:metal ion binding	COG0753@1|root,COG0753@2|Bacteria,1MUXZ@1224|Proteobacteria,2VGZA@28216|Betaproteobacteria,1K03A@119060|Burkholderiaceae	C	Belongs to the catalase family	K03781	katE, CAT, catB, srpA; catalase	[EC:1.11.1.6]	MAPK signaling pathway - plant	Signal transduction	Environmental Information Processing	PF06628	Catalase-related immune-responsive	-	1.11.1.-	-	1
NZ_CP052867	chromosome	chromosome:1	HJC54_RS13945	270969	272508	+	N	CDS	catalase	8	P:GO:0006979; P:GO:0042744; P:GO:0098869; F:GO:0004096; F:GO:0004601; F:GO:0016491; F:GO:0020037; F:GO:0046872	P:response to oxidative stress; P:hydrogen peroxide catabolic process; P:cellular oxidant detoxification; F:catalase activity; F:peroxidase activity; F:oxidoreductase activity; F:heme binding; F:metal ion binding	COG0753@1|root,COG0753@2|Bacteria,1MUXZ@1224|Proteobacteria,2VGZA@28216|Betaproteobacteria,1K03A@119060|Burkholderiaceae	C	Belongs to the catalase family	K03781	katE, CAT, catB, srpA; catalase	[EC:1.11.1.6]	MAPK signaling pathway - plant	Signal transduction	Environmental Information Processing	PF00199	Catalase	-	1.11.1.-	-	1
NZ_CP052867	chromosome	chromosome:1	HJC54_RS13945	270969	272508	+	N	CDS	catalase	8	P:GO:0006979; P:GO:0042744; P:GO:0098869; F:GO:0004096; F:GO:0004601; F:GO:0016491; F:GO:0020037; F:GO:0046872	P:response to oxidative stress; P:hydrogen peroxide catabolic process; P:cellular oxidant detoxification; F:catalase activity; F:peroxidase activity; F:oxidoreductase activity; F:heme binding; F:metal ion binding	COG0753@1|root,COG0753@2|Bacteria,1MUXZ@1224|Proteobacteria,2VGZA@28216|Betaproteobacteria,1K03A@119060|Burkholderiaceae	C	Belongs to the catalase family	K03781	katE, CAT, catB, srpA; catalase	[EC:1.11.1.6]	MAPK signaling pathway - yeast	Signal transduction	Environmental Information Processing	PF06628	Catalase-related immune-responsive	-	1.11.1.-	-	1
NZ_CP052867	chromosome	chromosome:1	HJC54_RS13945	270969	272508	+	N	CDS	catalase	8	P:GO:0006979; P:GO:0042744; P:GO:0098869; F:GO:0004096; F:GO:0004601; F:GO:0016491; F:GO:0020037; F:GO:0046872	P:response to oxidative stress; P:hydrogen peroxide catabolic process; P:cellular oxidant detoxification; F:catalase activity; F:peroxidase activity; F:oxidoreductase activity; F:heme binding; F:metal ion binding	COG0753@1|root,COG0753@2|Bacteria,1MUXZ@1224|Proteobacteria,2VGZA@28216|Betaproteobacteria,1K03A@119060|Burkholderiaceae	C	Belongs to the catalase family	K03781	katE, CAT, catB, srpA; catalase	[EC:1.11.1.6]	MAPK signaling pathway - yeast	Signal transduction	Environmental Information Processing	PF00199	Catalase	-	1.11.1.-	-	1
NZ_CP052867	chromosome	chromosome:1	HJC54_RS13945	270969	272508	+	N	CDS	catalase	8	P:GO:0006979; P:GO:0042744; P:GO:0098869; F:GO:0004096; F:GO:0004601; F:GO:0016491; F:GO:0020037; F:GO:0046872	P:response to oxidative stress; P:hydrogen peroxide catabolic process; P:cellular oxidant detoxification; F:catalase activity; F:peroxidase activity; F:oxidoreductase activity; F:heme binding; F:metal ion binding	COG0753@1|root,COG0753@2|Bacteria,1MUXZ@1224|Proteobacteria,2VGZA@28216|Betaproteobacteria,1K03A@119060|Burkholderiaceae	C	Belongs to the catalase family	K03781	katE, CAT, catB, srpA; catalase	[EC:1.11.1.6]	FoxO signaling pathway	Signal transduction	Environmental Information Processing	PF06628	Catalase-related immune-responsive	-	1.11.1.-	-	1
NZ_CP052867	chromosome	chromosome:1	HJC54_RS13945	270969	272508	+	N	CDS	catalase	8	P:GO:0006979; P:GO:0042744; P:GO:0098869; F:GO:0004096; F:GO:0004601; F:GO:0016491; F:GO:0020037; F:GO:0046872	P:response to oxidative stress; P:hydrogen peroxide catabolic process; P:cellular oxidant detoxification; F:catalase activity; F:peroxidase activity; F:oxidoreductase activity; F:heme binding; F:metal ion binding	COG0753@1|root,COG0753@2|Bacteria,1MUXZ@1224|Proteobacteria,2VGZA@28216|Betaproteobacteria,1K03A@119060|Burkholderiaceae	C	Belongs to the catalase family	K03781	katE, CAT, catB, srpA; catalase	[EC:1.11.1.6]	FoxO signaling pathway	Signal transduction	Environmental Information Processing	PF00199	Catalase	-	1.11.1.-	-	1
NZ_CP052867	chromosome	chromosome:1	HJC54_RS13945	270969	272508	+	N	CDS	catalase	8	P:GO:0006979; P:GO:0042744; P:GO:0098869; F:GO:0004096; F:GO:0004601; F:GO:0016491; F:GO:0020037; F:GO:0046872	P:response to oxidative stress; P:hydrogen peroxide catabolic process; P:cellular oxidant detoxification; F:catalase activity; F:peroxidase activity; F:oxidoreductase activity; F:heme binding; F:metal ion binding	COG0753@1|root,COG0753@2|Bacteria,1MUXZ@1224|Proteobacteria,2VGZA@28216|Betaproteobacteria,1K03A@119060|Burkholderiaceae	C	Belongs to the catalase family	K03781	katE, CAT, catB, srpA; catalase	[EC:1.11.1.6]	Peroxisome	Transport and catabolism	Cellular Processes	PF06628	Catalase-related immune-responsive	-	1.11.1.-	-	1
NZ_CP052867	chromosome	chromosome:1	HJC54_RS13945	270969	272508	+	N	CDS	catalase	8	P:GO:0006979; P:GO:0042744; P:GO:0098869; F:GO:0004096; F:GO:0004601; F:GO:0016491; F:GO:0020037; F:GO:0046872	P:response to oxidative stress; P:hydrogen peroxide catabolic process; P:cellular oxidant detoxification; F:catalase activity; F:peroxidase activity; F:oxidoreductase activity; F:heme binding; F:metal ion binding	COG0753@1|root,COG0753@2|Bacteria,1MUXZ@1224|Proteobacteria,2VGZA@28216|Betaproteobacteria,1K03A@119060|Burkholderiaceae	C	Belongs to the catalase family	K03781	katE, CAT, catB, srpA; catalase	[EC:1.11.1.6]	Peroxisome	Transport and catabolism	Cellular Processes	PF00199	Catalase	-	1.11.1.-	-	1
NZ_CP052867	chromosome	chromosome:1	HJC54_RS13945	270969	272508	+	N	CDS	catalase	8	P:GO:0006979; P:GO:0042744; P:GO:0098869; F:GO:0004096; F:GO:0004601; F:GO:0016491; F:GO:0020037; F:GO:0046872	P:response to oxidative stress; P:hydrogen peroxide catabolic process; P:cellular oxidant detoxification; F:catalase activity; F:peroxidase activity; F:oxidoreductase activity; F:heme binding; F:metal ion binding	COG0753@1|root,COG0753@2|Bacteria,1MUXZ@1224|Proteobacteria,2VGZA@28216|Betaproteobacteria,1K03A@119060|Burkholderiaceae	C	Belongs to the catalase family	K03781	katE, CAT, catB, srpA; catalase	[EC:1.11.1.6]	Longevity regulating pathway	Aging	Organismal Systems	PF06628	Catalase-related immune-responsive	-	1.11.1.-	-	1
NZ_CP052867	chromosome	chromosome:1	HJC54_RS13945	270969	272508	+	N	CDS	catalase	8	P:GO:0006979; P:GO:0042744; P:GO:0098869; F:GO:0004096; F:GO:0004601; F:GO:0016491; F:GO:0020037; F:GO:0046872	P:response to oxidative stress; P:hydrogen peroxide catabolic process; P:cellular oxidant detoxification; F:catalase activity; F:peroxidase activity; F:oxidoreductase activity; F:heme binding; F:metal ion binding	COG0753@1|root,COG0753@2|Bacteria,1MUXZ@1224|Proteobacteria,2VGZA@28216|Betaproteobacteria,1K03A@119060|Burkholderiaceae	C	Belongs to the catalase family	K03781	katE, CAT, catB, srpA; catalase	[EC:1.11.1.6]	Longevity regulating pathway	Aging	Organismal Systems	PF00199	Catalase	-	1.11.1.-	-	1
NZ_CP052867	chromosome	chromosome:1	HJC54_RS13945	270969	272508	+	N	CDS	catalase	8	P:GO:0006979; P:GO:0042744; P:GO:0098869; F:GO:0004096; F:GO:0004601; F:GO:0016491; F:GO:0020037; F:GO:0046872	P:response to oxidative stress; P:hydrogen peroxide catabolic process; P:cellular oxidant detoxification; F:catalase activity; F:peroxidase activity; F:oxidoreductase activity; F:heme binding; F:metal ion binding	COG0753@1|root,COG0753@2|Bacteria,1MUXZ@1224|Proteobacteria,2VGZA@28216|Betaproteobacteria,1K03A@119060|Burkholderiaceae	C	Belongs to the catalase family	K03781	katE, CAT, catB, srpA; catalase	[EC:1.11.1.6]	Longevity regulating pathway - worm	Aging	Organismal Systems	PF06628	Catalase-related immune-responsive	-	1.11.1.-	-	1
NZ_CP052867	chromosome	chromosome:1	HJC54_RS13945	270969	272508	+	N	CDS	catalase	8	P:GO:0006979; P:GO:0042744; P:GO:0098869; F:GO:0004096; F:GO:0004601; F:GO:0016491; F:GO:0020037; F:GO:0046872	P:response to oxidative stress; P:hydrogen peroxide catabolic process; P:cellular oxidant detoxification; F:catalase activity; F:peroxidase activity; F:oxidoreductase activity; F:heme binding; F:metal ion binding	COG0753@1|root,COG0753@2|Bacteria,1MUXZ@1224|Proteobacteria,2VGZA@28216|Betaproteobacteria,1K03A@119060|Burkholderiaceae	C	Belongs to the catalase family	K03781	katE, CAT, catB, srpA; catalase	[EC:1.11.1.6]	Longevity regulating pathway - worm	Aging	Organismal Systems	PF00199	Catalase	-	1.11.1.-	-	1
NZ_CP052867	chromosome	chromosome:1	HJC54_RS13945	270969	272508	+	N	CDS	catalase	8	P:GO:0006979; P:GO:0042744; P:GO:0098869; F:GO:0004096; F:GO:0004601; F:GO:0016491; F:GO:0020037; F:GO:0046872	P:response to oxidative stress; P:hydrogen peroxide catabolic process; P:cellular oxidant detoxification; F:catalase activity; F:peroxidase activity; F:oxidoreductase activity; F:heme binding; F:metal ion binding	COG0753@1|root,COG0753@2|Bacteria,1MUXZ@1224|Proteobacteria,2VGZA@28216|Betaproteobacteria,1K03A@119060|Burkholderiaceae	C	Belongs to the catalase family	K03781	katE, CAT, catB, srpA; catalase	[EC:1.11.1.6]	Longevity regulating pathway - multiple species	Aging	Organismal Systems	PF06628	Catalase-related immune-responsive	-	1.11.1.-	-	1
NZ_CP052867	chromosome	chromosome:1	HJC54_RS13945	270969	272508	+	N	CDS	catalase	8	P:GO:0006979; P:GO:0042744; P:GO:0098869; F:GO:0004096; F:GO:0004601; F:GO:0016491; F:GO:0020037; F:GO:0046872	P:response to oxidative stress; P:hydrogen peroxide catabolic process; P:cellular oxidant detoxification; F:catalase activity; F:peroxidase activity; F:oxidoreductase activity; F:heme binding; F:metal ion binding	COG0753@1|root,COG0753@2|Bacteria,1MUXZ@1224|Proteobacteria,2VGZA@28216|Betaproteobacteria,1K03A@119060|Burkholderiaceae	C	Belongs to the catalase family	K03781	katE, CAT, catB, srpA; catalase	[EC:1.11.1.6]	Longevity regulating pathway - multiple species	Aging	Organismal Systems	PF00199	Catalase	-	1.11.1.-	-	1
NZ_CP052867	chromosome	chromosome:1	HJC54_RS13945	270969	272508	+	N	CDS	catalase	8	P:GO:0006979; P:GO:0042744; P:GO:0098869; F:GO:0004096; F:GO:0004601; F:GO:0016491; F:GO:0020037; F:GO:0046872	P:response to oxidative stress; P:hydrogen peroxide catabolic process; P:cellular oxidant detoxification; F:catalase activity; F:peroxidase activity; F:oxidoreductase activity; F:heme binding; F:metal ion binding	COG0753@1|root,COG0753@2|Bacteria,1MUXZ@1224|Proteobacteria,2VGZA@28216|Betaproteobacteria,1K03A@119060|Burkholderiaceae	C	Belongs to the catalase family	K03781	katE, CAT, catB, srpA; catalase	[EC:1.11.1.6]	Chemical carcinogenesis - reactive oxygen species	Cancer: overview	Human Diseases	PF06628	Catalase-related immune-responsive	-	1.11.1.-	-	1
NZ_CP052867	chromosome	chromosome:1	HJC54_RS13945	270969	272508	+	N	CDS	catalase	8	P:GO:0006979; P:GO:0042744; P:GO:0098869; F:GO:0004096; F:GO:0004601; F:GO:0016491; F:GO:0020037; F:GO:0046872	P:response to oxidative stress; P:hydrogen peroxide catabolic process; P:cellular oxidant detoxification; F:catalase activity; F:peroxidase activity; F:oxidoreductase activity; F:heme binding; F:metal ion binding	COG0753@1|root,COG0753@2|Bacteria,1MUXZ@1224|Proteobacteria,2VGZA@28216|Betaproteobacteria,1K03A@119060|Burkholderiaceae	C	Belongs to the catalase family	K03781	katE, CAT, catB, srpA; catalase	[EC:1.11.1.6]	Chemical carcinogenesis - reactive oxygen species	Cancer: overview	Human Diseases	PF00199	Catalase	-	1.11.1.-	-	1
NZ_CP052867	chromosome	chromosome:1	HJC54_RS13945	270969	272508	+	N	CDS	catalase	8	P:GO:0006979; P:GO:0042744; P:GO:0098869; F:GO:0004096; F:GO:0004601; F:GO:0016491; F:GO:0020037; F:GO:0046872	P:response to oxidative stress; P:hydrogen peroxide catabolic process; P:cellular oxidant detoxification; F:catalase activity; F:peroxidase activity; F:oxidoreductase activity; F:heme binding; F:metal ion binding	COG0753@1|root,COG0753@2|Bacteria,1MUXZ@1224|Proteobacteria,2VGZA@28216|Betaproteobacteria,1K03A@119060|Burkholderiaceae	C	Belongs to the catalase family	K03781	katE, CAT, catB, srpA; catalase	[EC:1.11.1.6]	Amyotrophic lateral sclerosis	Neurodegenerative disease	Human Diseases	PF06628	Catalase-related immune-responsive	-	1.11.1.-	-	1
NZ_CP052867	chromosome	chromosome:1	HJC54_RS13945	270969	272508	+	N	CDS	catalase	8	P:GO:0006979; P:GO:0042744; P:GO:0098869; F:GO:0004096; F:GO:0004601; F:GO:0016491; F:GO:0020037; F:GO:0046872	P:response to oxidative stress; P:hydrogen peroxide catabolic process; P:cellular oxidant detoxification; F:catalase activity; F:peroxidase activity; F:oxidoreductase activity; F:heme binding; F:metal ion binding	COG0753@1|root,COG0753@2|Bacteria,1MUXZ@1224|Proteobacteria,2VGZA@28216|Betaproteobacteria,1K03A@119060|Burkholderiaceae	C	Belongs to the catalase family	K03781	katE, CAT, catB, srpA; catalase	[EC:1.11.1.6]	Amyotrophic lateral sclerosis	Neurodegenerative disease	Human Diseases	PF00199	Catalase	-	1.11.1.-	-	1
NZ_CP052867	chromosome	chromosome:1	HJC54_RS13945	270969	272508	+	N	CDS	catalase	8	P:GO:0006979; P:GO:0042744; P:GO:0098869; F:GO:0004096; F:GO:0004601; F:GO:0016491; F:GO:0020037; F:GO:0046872	P:response to oxidative stress; P:hydrogen peroxide catabolic process; P:cellular oxidant detoxification; F:catalase activity; F:peroxidase activity; F:oxidoreductase activity; F:heme binding; F:metal ion binding	COG0753@1|root,COG0753@2|Bacteria,1MUXZ@1224|Proteobacteria,2VGZA@28216|Betaproteobacteria,1K03A@119060|Burkholderiaceae	C	Belongs to the catalase family	K03781	katE, CAT, catB, srpA; catalase	[EC:1.11.1.6]	Pathways of neurodegeneration - multiple diseases	Neurodegenerative disease	Human Diseases	PF06628	Catalase-related immune-responsive	-	1.11.1.-	-	1
NZ_CP052867	chromosome	chromosome:1	HJC54_RS13945	270969	272508	+	N	CDS	catalase	8	P:GO:0006979; P:GO:0042744; P:GO:0098869; F:GO:0004096; F:GO:0004601; F:GO:0016491; F:GO:0020037; F:GO:0046872	P:response to oxidative stress; P:hydrogen peroxide catabolic process; P:cellular oxidant detoxification; F:catalase activity; F:peroxidase activity; F:oxidoreductase activity; F:heme binding; F:metal ion binding	COG0753@1|root,COG0753@2|Bacteria,1MUXZ@1224|Proteobacteria,2VGZA@28216|Betaproteobacteria,1K03A@119060|Burkholderiaceae	C	Belongs to the catalase family	K03781	katE, CAT, catB, srpA; catalase	[EC:1.11.1.6]	Pathways of neurodegeneration - multiple diseases	Neurodegenerative disease	Human Diseases	PF00199	Catalase	-	1.11.1.-	-	1
NZ_CP052867	chromosome	chromosome:1	HJC54_RS13950	272659	273271	+	N	CDS	ankyrin repeat domain-containing protein				COG0666@1|root,COG0666@2|Bacteria,1N0BQ@1224|Proteobacteria,2VY6W@28216|Betaproteobacteria,1KFII@119060|Burkholderiaceae	S	Ankyrin repeats (many copies)	K06867	K06867; uncharacterized protein		Function unknown	Poorly characterized	Not Included in Pathway or Brite	PF12796	Ankyrin repeats (3 copies)
NZ_CP052867	chromosome	chromosome:1	HJC54_RS13955	273377	274418	-	N	CDS	questin oxidase family protein	1	F:GO:0016491	F:oxidoreductase activity	2DM5B@1|root,31SEY@2|Bacteria,1RJ72@1224|Proteobacteria,2WG20@28216|Betaproteobacteria,1K6IT@119060|Burkholderiaceae	S	Protein of unknown function (DUF4243)							PF14027	Questin oxidase-like
NZ_CP052867	chromosome	chromosome:1	HJC54_RS13965	275001	275829	+	N	CDS	class I SAM-dependent methyltransferase	3	P:GO:0032259; F:GO:0008168; F:GO:0016740	P:methylation; F:methyltransferase activity; F:transferase activity	COG0500@1|root,COG2226@2|Bacteria,1PJ38@1224|Proteobacteria,2W7NG@28216|Betaproteobacteria,1K320@119060|Burkholderiaceae	Q	Methionine biosynthesis protein MetW							PF08241	Methyltransferase domain
NZ_CP052867	chromosome	chromosome:1	HJC54_RS13975	276789	277179	+	N	CDS	VOC family protein	1	F:GO:0051213	F:dioxygenase activity	COG0346@1|root,COG0346@2|Bacteria,1MZXF@1224|Proteobacteria,2VVN5@28216|Betaproteobacteria,1KAMP@119060|Burkholderiaceae	C	Glyoxalase-like domain
NZ_CP052867	chromosome	chromosome:1	HJC54_RS13980	277360	277948	+	N	CDS	class I SAM-dependent methyltransferase	3	P:GO:0032259; F:GO:0008168; F:GO:0016740	P:methylation; F:methyltransferase activity; F:transferase activity	COG0500@1|root,COG0500@2|Bacteria,1R555@1224|Proteobacteria,2VSEA@28216|Betaproteobacteria,1K6JR@119060|Burkholderiaceae	Q	PFAM Methyltransferase type 11							PF08241	Methyltransferase domain
NZ_CP052867	chromosome	chromosome:1	HJC54_RS13985	278025	279318	-	N	CDS	NAD(P)/FAD-dependent oxidoreductase	3	P:GO:0006116; F:GO:0003954; F:GO:0016491	P:NADH oxidation; F:NADH dehydrogenase activity; F:oxidoreductase activity	COG1252@1|root,COG1252@2|Bacteria,1MX96@1224|Proteobacteria,2VJR6@28216|Betaproteobacteria,1K5P3@119060|Burkholderiaceae	C	fad-dependent pyridine	K03885	ndh; NADH:ubiquinone reductase (H+-translocating)	[EC:7.1.1.2]	Oxidative phosphorylation	Energy metabolism	Metabolism	PF07992	Pyridine nucleotide-disulphide oxidoreductase
NZ_CP052867	chromosome	chromosome:1	HJC54_RS13990	279461	280130	+	N	CDS	TetR/AcrR family transcriptional regulator	1	F:GO:0003677	F:DNA binding	COG1309@1|root,COG1309@2|Bacteria,1N4HB@1224|Proteobacteria,2VU33@28216|Betaproteobacteria,1K617@119060|Burkholderiaceae	K	Bacterial regulatory proteins, tetR family							PF00440	Bacterial regulatory proteins, tetR family
NZ_CP052867	chromosome	chromosome:1	HJC54_RS13995	280035	280455	+	N	CDS	H-NS histone family protein													PF00816	H-NS histone family
NZ_CP052867	chromosome	chromosome:1	HJC54_RS14000	280360	282076	-	N	CDS	MCP four helix bundle domain-containing protein	5	P:GO:0006935; P:GO:0007165; F:GO:0004888; C:GO:0016020; C:GO:0016021	P:chemotaxis; P:signal transduction; F:transmembrane signaling receptor activity; C:membrane; C:integral component of membrane	COG0840@1|root,COG0840@2|Bacteria,1MU9B@1224|Proteobacteria,2VGZ8@28216|Betaproteobacteria,1K1BU@119060|Burkholderiaceae	NT	Chemotaxis sensory transducer							PF00672	HAMP domain
NZ_CP052867	chromosome	chromosome:1	HJC54_RS14000	280360	282076	-	N	CDS	MCP four helix bundle domain-containing protein	5	P:GO:0006935; P:GO:0007165; F:GO:0004888; C:GO:0016020; C:GO:0016021	P:chemotaxis; P:signal transduction; F:transmembrane signaling receptor activity; C:membrane; C:integral component of membrane	COG0840@1|root,COG0840@2|Bacteria,1MU9B@1224|Proteobacteria,2VGZ8@28216|Betaproteobacteria,1K1BU@119060|Burkholderiaceae	NT	Chemotaxis sensory transducer							PF12729	Four helix bundle sensory module for signal transduction
NZ_CP052867	chromosome	chromosome:1	HJC54_RS14000	280360	282076	-	N	CDS	MCP four helix bundle domain-containing protein	5	P:GO:0006935; P:GO:0007165; F:GO:0004888; C:GO:0016020; C:GO:0016021	P:chemotaxis; P:signal transduction; F:transmembrane signaling receptor activity; C:membrane; C:integral component of membrane	COG0840@1|root,COG0840@2|Bacteria,1MU9B@1224|Proteobacteria,2VGZ8@28216|Betaproteobacteria,1K1BU@119060|Burkholderiaceae	NT	Chemotaxis sensory transducer							PF00015	Methyl-accepting chemotaxis protein (MCP) signalling domain
NZ_CP052867	chromosome	chromosome:1	HJC54_RS14005	282525	283506	-	N	CDS	ABC transporter permease	5	P:GO:0055085; F:GO:0022857; C:GO:0005886; C:GO:0016020; C:GO:0016021	P:transmembrane transport; F:transmembrane transporter activity; C:plasma membrane; C:membrane; C:integral component of membrane	COG1172@1|root,COG1172@2|Bacteria,1R5M6@1224|Proteobacteria,2W8BW@28216|Betaproteobacteria,1K3XC@119060|Burkholderiaceae	P	Branched-chain amino acid transport system / permease component	K10440	rbsC; ribose transport system permease protein		ABC transporters	Membrane transport	Environmental Information Processing	PF02653	Branched-chain amino acid transport system / permease component
NZ_CP052867	chromosome	chromosome:1	HJC54_RS14010	283498	284551	-	N	CDS	ABC transporter permease	5	P:GO:0055085; F:GO:0022857; C:GO:0005886; C:GO:0016020; C:GO:0016021	P:transmembrane transport; F:transmembrane transporter activity; C:plasma membrane; C:membrane; C:integral component of membrane	COG1172@1|root,COG1172@2|Bacteria,1MX7D@1224|Proteobacteria,2VH0P@28216|Betaproteobacteria,1K6T6@119060|Burkholderiaceae	P	Branched-chain amino acid transport system / permease component	K10440	rbsC; ribose transport system permease protein		ABC transporters	Membrane transport	Environmental Information Processing	PF02653	Branched-chain amino acid transport system / permease component
NZ_CP052867	chromosome	chromosome:1	HJC54_RS14015	284547	286113	-	N	CDS	sugar ABC transporter ATP-binding protein	4	F:GO:0000166; F:GO:0005524; C:GO:0005886; C:GO:0016020	F:nucleotide binding; F:ATP binding; C:plasma membrane; C:membrane	COG1129@1|root,COG1129@2|Bacteria,1MU22@1224|Proteobacteria,2VHRA@28216|Betaproteobacteria,1K2C6@119060|Burkholderiaceae	G	ABC transporter	K10441	rbsA; ribose transport system ATP-binding protein	[EC:7.5.2.7]	ABC transporters	Membrane transport	Environmental Information Processing	PF00005	ABC transporter
NZ_CP052867	chromosome	chromosome:1	HJC54_RS14020	286109	287114	-	N	CDS	sugar ABC transporter substrate-binding protein	1	C:GO:0042597	C:periplasmic space	COG1879@1|root,COG1879@2|Bacteria,1R4R5@1224|Proteobacteria,2WFFG@28216|Betaproteobacteria,1K175@119060|Burkholderiaceae	G	Periplasmic binding protein domain	K10439	rbsB; ribose transport system substrate-binding protein		ABC transporters	Membrane transport	Environmental Information Processing	PF13407	Periplasmic binding protein domain
NZ_CP052867	chromosome	chromosome:1	HJC54_RS14020	286109	287114	-	N	CDS	sugar ABC transporter substrate-binding protein	1	C:GO:0042597	C:periplasmic space	COG1879@1|root,COG1879@2|Bacteria,1R4R5@1224|Proteobacteria,2WFFG@28216|Betaproteobacteria,1K175@119060|Burkholderiaceae	G	Periplasmic binding protein domain	K10439	rbsB; ribose transport system substrate-binding protein		Bacterial chemotaxis	Cell motility	Cellular Processes	PF13407	Periplasmic binding protein domain
NZ_CP052867	chromosome	chromosome:1	HJC54_RS14025	287915	289601	+	N	CDS	MCP four helix bundle domain-containing protein	5	P:GO:0006935; P:GO:0007165; F:GO:0004888; C:GO:0016020; C:GO:0016021	P:chemotaxis; P:signal transduction; F:transmembrane signaling receptor activity; C:membrane; C:integral component of membrane	COG0840@1|root,COG0840@2|Bacteria,1MU9B@1224|Proteobacteria,2VGZ8@28216|Betaproteobacteria,1K1BU@119060|Burkholderiaceae	NT	Chemotaxis sensory transducer							PF12729	Four helix bundle sensory module for signal transduction
NZ_CP052867	chromosome	chromosome:1	HJC54_RS14025	287915	289601	+	N	CDS	MCP four helix bundle domain-containing protein	5	P:GO:0006935; P:GO:0007165; F:GO:0004888; C:GO:0016020; C:GO:0016021	P:chemotaxis; P:signal transduction; F:transmembrane signaling receptor activity; C:membrane; C:integral component of membrane	COG0840@1|root,COG0840@2|Bacteria,1MU9B@1224|Proteobacteria,2VGZ8@28216|Betaproteobacteria,1K1BU@119060|Burkholderiaceae	NT	Chemotaxis sensory transducer							PF00672	HAMP domain
NZ_CP052867	chromosome	chromosome:1	HJC54_RS14025	287915	289601	+	N	CDS	MCP four helix bundle domain-containing protein	5	P:GO:0006935; P:GO:0007165; F:GO:0004888; C:GO:0016020; C:GO:0016021	P:chemotaxis; P:signal transduction; F:transmembrane signaling receptor activity; C:membrane; C:integral component of membrane	COG0840@1|root,COG0840@2|Bacteria,1MU9B@1224|Proteobacteria,2VGZ8@28216|Betaproteobacteria,1K1BU@119060|Burkholderiaceae	NT	Chemotaxis sensory transducer							PF00015	Methyl-accepting chemotaxis protein (MCP) signalling domain
NZ_CP052867	chromosome	chromosome:1	HJC54_RS14030	289816	290329	+	N	CDS	chemotaxis protein CheW	2	P:GO:0006935; P:GO:0007165	P:chemotaxis; P:signal transduction	COG0835@1|root,COG0835@2|Bacteria,1RD1W@1224|Proteobacteria,2VR41@28216|Betaproteobacteria,1K7VJ@119060|Burkholderiaceae	NT	Two component signalling adaptor domain	K03408	cheW; purine-binding chemotaxis protein CheW		Two-component system	Signal transduction	Environmental Information Processing	PF01584	CheW-like domain
NZ_CP052867	chromosome	chromosome:1	HJC54_RS14030	289816	290329	+	N	CDS	chemotaxis protein CheW	2	P:GO:0006935; P:GO:0007165	P:chemotaxis; P:signal transduction	COG0835@1|root,COG0835@2|Bacteria,1RD1W@1224|Proteobacteria,2VR41@28216|Betaproteobacteria,1K7VJ@119060|Burkholderiaceae	NT	Two component signalling adaptor domain	K03408	cheW; purine-binding chemotaxis protein CheW		Bacterial chemotaxis	Cell motility	Cellular Processes	PF01584	CheW-like domain
NZ_CP052867	chromosome	chromosome:1	HJC54_RS14035	290662	290989	+	N	CDS	IS3 family transposase	5	P:GO:0006313; P:GO:0015074; F:GO:0003676; F:GO:0003677; F:GO:0004803	P:transposition, DNA-mediated; P:DNA integration; F:nucleic acid binding; F:DNA binding; F:transposase activity	COG2963@1|root,COG2963@2|Bacteria,1N1AA@1224|Proteobacteria,2VSJA@28216|Betaproteobacteria,1K8EV@119060|Burkholderiaceae	L	transposase IS3 IS911 family protein	K07483	K07483; transposase		Replication and repair	Unclassified: genetic information processing	Not Included in Pathway or Brite
NZ_CP052867	chromosome	chromosome:1	HJC54_RS14040	291320	291812	+	Y	CDS	helix-turn-helix domain-containing protein
NZ_CP052867	chromosome	chromosome:1	HJC54_RS14045	291961	292262	+	Y	CDS	transposase
NZ_CP052867	chromosome	chromosome:1	HJC54_RS14050	292761	293280	-	N	CDS	DUF2778 domain-containing protein				2CPQ7@1|root,2ZXX6@2|Bacteria,1RG84@1224|Proteobacteria,2WFF4@28216|Betaproteobacteria,1KI1B@119060|Burkholderiaceae	S	Protein of unknown function (DUF2778)							PF10908	Protein of unknown function (DUF2778)
NZ_CP052867	chromosome	chromosome:1	HJC54_RS14055	293291	293782	-	Y	CDS	type VI secretion system tube protein Hcp
NZ_CP052867	chromosome	chromosome:1	HJC54_RS14060	294297	295188	-	N	CDS	NAD(P)-dependent oxidoreductase	6	P:GO:0016054; F:GO:0003858; F:GO:0016491; F:GO:0016616; F:GO:0050661; F:GO:0051287	P:organic acid catabolic process; F:3-hydroxybutyrate dehydrogenase activity; F:oxidoreductase activity; F:oxidoreductase activity, acting on the CH-OH group of donors, NAD or NADP as acceptor; F:NADP binding; F:NAD binding	COG2084@1|root,COG2084@2|Bacteria,1MV48@1224|Proteobacteria,2VKTQ@28216|Betaproteobacteria,1K4MB@119060|Burkholderiaceae	I	NAD-binding of NADP-dependent 3-hydroxyisobutyrate dehydrogenase							PF03446	NAD binding domain of 6-phosphogluconate dehydrogenase
NZ_CP052867	chromosome	chromosome:1	HJC54_RS14060	294297	295188	-	N	CDS	NAD(P)-dependent oxidoreductase	6	P:GO:0016054; F:GO:0003858; F:GO:0016491; F:GO:0016616; F:GO:0050661; F:GO:0051287	P:organic acid catabolic process; F:3-hydroxybutyrate dehydrogenase activity; F:oxidoreductase activity; F:oxidoreductase activity, acting on the CH-OH group of donors, NAD or NADP as acceptor; F:NADP binding; F:NAD binding	COG2084@1|root,COG2084@2|Bacteria,1MV48@1224|Proteobacteria,2VKTQ@28216|Betaproteobacteria,1K4MB@119060|Burkholderiaceae	I	NAD-binding of NADP-dependent 3-hydroxyisobutyrate dehydrogenase							PF14833	NAD-binding of NADP-dependent 3-hydroxyisobutyrate dehydrogenase
NZ_CP052867	chromosome	chromosome:1	HJC54_RS14065	295436	296477	+	N	CDS	L-glyceraldehyde 3-phosphate reductase	6	P:GO:0006811; P:GO:0006813; P:GO:0034220; P:GO:0034765; F:GO:0005244; F:GO:0047834	P:ion transport; P:potassium ion transport; P:ion transmembrane transport; P:regulation of ion transmembrane transport; F:voltage-gated ion channel activity; F:D-threo-aldose 1-dehydrogenase activity	COG0667@1|root,COG0667@2|Bacteria,1MU1S@1224|Proteobacteria,2VKE9@28216|Betaproteobacteria,1K07I@119060|Burkholderiaceae	C	aldo keto reductase	K19265	gpr; L-glyceraldehyde 3-phosphate reductase	[EC:1.1.1.-]	Enzymes with EC numbers	Unclassified: metabolism	Not Included in Pathway or Brite	PF00248	Aldo/keto reductase family	-	-	CE12	1
NZ_CP052867	chromosome	chromosome:1	HJC54_RS14070	296537	297116	-	N	CDS	methyltransferase domain-containing protein	3	P:GO:0032259; F:GO:0008168; F:GO:0016740	P:methylation; F:methyltransferase activity; F:transferase activity	COG3963@1|root,COG3963@2|Bacteria,1N1KB@1224|Proteobacteria,2VTWU@28216|Betaproteobacteria,1K9J9@119060|Burkholderiaceae	I	Phospholipid N-methyltransferase	K00570	pmtA; phosphatidylethanolamine/phosphatidyl-N-methylethanolamine N-methyltransferase	[EC:2.1.1.17 2.1.1.71]	Glycerophospholipid metabolism	Lipid metabolism	Metabolism	PF13649	Methyltransferase domain
NZ_CP052867	chromosome	chromosome:1	HJC54_RS14075	297462	298359	+	N	CDS	MurR/RpiR family transcriptional regulator	7	P:GO:0006096; P:GO:0006355; P:GO:1901135; F:GO:0003700; F:GO:0097367; C:GO:0016020; C:GO:0016021	P:glycolytic process; P:regulation of transcription, DNA-templated; P:carbohydrate derivative metabolic process; F:DNA-binding transcription factor activity; F:carbohydrate derivative binding; C:membrane; C:integral component of membrane	COG1737@1|root,COG1737@2|Bacteria,1MW2B@1224|Proteobacteria,2VPMG@28216|Betaproteobacteria,1K55T@119060|Burkholderiaceae	K	Transcriptional regulator, RpiR family							PF01380	SIS domain
NZ_CP052867	chromosome	chromosome:1	HJC54_RS14075	297462	298359	+	N	CDS	MurR/RpiR family transcriptional regulator	7	P:GO:0006096; P:GO:0006355; P:GO:1901135; F:GO:0003700; F:GO:0097367; C:GO:0016020; C:GO:0016021	P:glycolytic process; P:regulation of transcription, DNA-templated; P:carbohydrate derivative metabolic process; F:DNA-binding transcription factor activity; F:carbohydrate derivative binding; C:membrane; C:integral component of membrane	COG1737@1|root,COG1737@2|Bacteria,1MW2B@1224|Proteobacteria,2VPMG@28216|Betaproteobacteria,1K55T@119060|Burkholderiaceae	K	Transcriptional regulator, RpiR family							PF01418	Helix-turn-helix domain, rpiR family
NZ_CP052867	chromosome	chromosome:1	HJC54_RS14080	298595	301766	+	N	CDS	type VI secretion system tip protein VgrG				COG3501@1|root,COG4253@1|root,COG3501@2|Bacteria,COG4253@2|Bacteria,1MU7Q@1224|Proteobacteria,2VJDF@28216|Betaproteobacteria,1K160@119060|Burkholderiaceae	M	Rhs element Vgr	K11904	vgrG; type VI secretion system secreted protein VgrG		Bacterial secretion system	Membrane transport	Environmental Information Processing	PF10106	Uncharacterized protein conserved in bacteria (DUF2345)
NZ_CP052867	chromosome	chromosome:1	HJC54_RS14080	298595	301766	+	N	CDS	type VI secretion system tip protein VgrG				COG3501@1|root,COG4253@1|root,COG3501@2|Bacteria,COG4253@2|Bacteria,1MU7Q@1224|Proteobacteria,2VJDF@28216|Betaproteobacteria,1K160@119060|Burkholderiaceae	M	Rhs element Vgr	K11904	vgrG; type VI secretion system secreted protein VgrG		Bacterial secretion system	Membrane transport	Environmental Information Processing	PF13296	Putative type VI secretion system Rhs element Vgr
NZ_CP052867	chromosome	chromosome:1	HJC54_RS14080	298595	301766	+	N	CDS	type VI secretion system tip protein VgrG				COG3501@1|root,COG4253@1|root,COG3501@2|Bacteria,COG4253@2|Bacteria,1MU7Q@1224|Proteobacteria,2VJDF@28216|Betaproteobacteria,1K160@119060|Burkholderiaceae	M	Rhs element Vgr	K11904	vgrG; type VI secretion system secreted protein VgrG		Bacterial secretion system	Membrane transport	Environmental Information Processing	PF05954	Phage tail baseplate hub (GPD)
NZ_CP052867	chromosome	chromosome:1	HJC54_RS14080	298595	301766	+	N	CDS	type VI secretion system tip protein VgrG				COG3501@1|root,COG4253@1|root,COG3501@2|Bacteria,COG4253@2|Bacteria,1MU7Q@1224|Proteobacteria,2VJDF@28216|Betaproteobacteria,1K160@119060|Burkholderiaceae	M	Rhs element Vgr	K11904	vgrG; type VI secretion system secreted protein VgrG		Bacterial secretion system	Membrane transport	Environmental Information Processing	PF04717	Type VI secretion system/phage-baseplate injector OB domain
NZ_CP052867	chromosome	chromosome:1	HJC54_RS14085	301824	302241	+	N	CDS	hypothetical protein				COG3209@1|root,COG3209@2|Bacteria	M	self proteolysis
NZ_CP052867	chromosome	chromosome:1	HJC54_RS14090	302199	302457	-	N	CDS	transposase				COG3293@1|root,COG3293@2|Bacteria,1RJDY@1224|Proteobacteria,2VSPF@28216|Betaproteobacteria,1K8MF@119060|Burkholderiaceae	L	Elements of external origin							PF13340	Putative transposase of IS4/5 family (DUF4096)
NZ_CP052867	chromosome	chromosome:1	HJC54_RS29405	302786	302894	+	N	CDS	hypothetical protein													PF09000	Cytotoxic
NZ_CP052867	chromosome	chromosome:1	HJC54_RS14100	302890	303145	+	N	CDS	hypothetical protein
NZ_CP052867	chromosome	chromosome:1	HJC54_RS14105	303408	303819	+	N	CDS	GNAT family N-acetyltransferase	2	F:GO:0008080; F:GO:0016740	F:N-acetyltransferase activity; F:transferase activity	COG0454@1|root,COG0456@2|Bacteria,1NKQ4@1224|Proteobacteria,2WDWP@28216|Betaproteobacteria,1KB5D@119060|Burkholderiaceae	K	FR47-like protein							PF00583	Acetyltransferase (GNAT) family
NZ_CP052867	chromosome	chromosome:1	HJC54_RS14110	304058	305318	-	N	CDS	MFS transporter	4	P:GO:0055085; F:GO:0022857; C:GO:0016020; C:GO:0016021	P:transmembrane transport; F:transmembrane transporter activity; C:membrane; C:integral component of membrane	COG2271@1|root,COG2271@2|Bacteria,1MUEK@1224|Proteobacteria,2W00W@28216|Betaproteobacteria,1K2CJ@119060|Burkholderiaceae	G	PFAM major facilitator superfamily MFS_1							PF07690	Major Facilitator Superfamily
NZ_CP052867	chromosome	chromosome:1	HJC54_RS14115	305479	306532	-	N	CDS	ABC transporter substrate-binding protein	1	P:GO:0006790	P:sulfur compound metabolic process	COG0715@1|root,COG0715@2|Bacteria,1MWJF@1224|Proteobacteria,2VN3N@28216|Betaproteobacteria,1KH5N@119060|Burkholderiaceae	P	NMT1-like family	K15553	ssuA; sulfonate transport system substrate-binding protein		Sulfur metabolism	Energy metabolism	Metabolism
NZ_CP052867	chromosome	chromosome:1	HJC54_RS14115	305479	306532	-	N	CDS	ABC transporter substrate-binding protein	1	P:GO:0006790	P:sulfur compound metabolic process	COG0715@1|root,COG0715@2|Bacteria,1MWJF@1224|Proteobacteria,2VN3N@28216|Betaproteobacteria,1KH5N@119060|Burkholderiaceae	P	NMT1-like family	K15553	ssuA; sulfonate transport system substrate-binding protein		ABC transporters	Membrane transport	Environmental Information Processing
NZ_CP052867	chromosome	chromosome:1	HJC54_RS14120	306793	307459	+	N	CDS	response regulator transcription factor	3	P:GO:0000160; P:GO:0006355; F:GO:0003677	P:phosphorelay signal transduction system; P:regulation of transcription, DNA-templated; F:DNA binding	COG0745@1|root,COG0745@2|Bacteria,1R9VT@1224|Proteobacteria,2VQNJ@28216|Betaproteobacteria,1K5T0@119060|Burkholderiaceae	K	Pfam Response regulator receiver	K07774	tctD; two-component system, OmpR family, response regulator TctD		Two-component system	Signal transduction	Environmental Information Processing	PF00486	Transcriptional regulatory protein, C terminal
NZ_CP052867	chromosome	chromosome:1	HJC54_RS14120	306793	307459	+	N	CDS	response regulator transcription factor	3	P:GO:0000160; P:GO:0006355; F:GO:0003677	P:phosphorelay signal transduction system; P:regulation of transcription, DNA-templated; F:DNA binding	COG0745@1|root,COG0745@2|Bacteria,1R9VT@1224|Proteobacteria,2VQNJ@28216|Betaproteobacteria,1K5T0@119060|Burkholderiaceae	K	Pfam Response regulator receiver	K07774	tctD; two-component system, OmpR family, response regulator TctD		Two-component system	Signal transduction	Environmental Information Processing	PF00072	Response regulator receiver domain
NZ_CP052867	chromosome	chromosome:1	HJC54_RS14125	307445	308852	+	N	CDS	sensor histidine kinase	13	P:GO:0000160; P:GO:0007165; P:GO:0016310; P:GO:0018106; P:GO:0051716; F:GO:0000155; F:GO:0000166; F:GO:0004673; F:GO:0016301; F:GO:0016740; F:GO:0016772; C:GO:0016020; C:GO:0016021	P:phosphorelay signal transduction system; P:signal transduction; P:phosphorylation; P:peptidyl-histidine phosphorylation; P:cellular response to stimulus; F:phosphorelay sensor kinase activity; F:nucleotide binding; F:protein histidine kinase activity; F:kinase activity; F:transferase activity; F:transferase activity, transferring phosphorus-containing groups; C:membrane; C:integral component of…	COG0642@1|root,COG0642@2|Bacteria,1QTSX@1224|Proteobacteria,2VQUI@28216|Betaproteobacteria,1K54W@119060|Burkholderiaceae	T	Histidine kinase	K07649	tctE; two-component system, OmpR family, sensor histidine kinase TctE	[EC:2.7.13.3]	Two-component system	Signal transduction	Environmental Information Processing	PF02518	Histidine kinase-, DNA gyrase B-, and HSP90-like ATPase
NZ_CP052867	chromosome	chromosome:1	HJC54_RS14125	307445	308852	+	N	CDS	sensor histidine kinase	13	P:GO:0000160; P:GO:0007165; P:GO:0016310; P:GO:0018106; P:GO:0051716; F:GO:0000155; F:GO:0000166; F:GO:0004673; F:GO:0016301; F:GO:0016740; F:GO:0016772; C:GO:0016020; C:GO:0016021	P:phosphorelay signal transduction system; P:signal transduction; P:phosphorylation; P:peptidyl-histidine phosphorylation; P:cellular response to stimulus; F:phosphorelay sensor kinase activity; F:nucleotide binding; F:protein histidine kinase activity; F:kinase activity; F:transferase activity; F:transferase activity, transferring phosphorus-containing groups; C:membrane; C:integral component of…	COG0642@1|root,COG0642@2|Bacteria,1QTSX@1224|Proteobacteria,2VQUI@28216|Betaproteobacteria,1K54W@119060|Burkholderiaceae	T	Histidine kinase	K07649	tctE; two-component system, OmpR family, sensor histidine kinase TctE	[EC:2.7.13.3]	Two-component system	Signal transduction	Environmental Information Processing	PF00512	His Kinase A (phospho-acceptor) domain
NZ_CP052867	chromosome	chromosome:1	HJC54_RS14125	307445	308852	+	N	CDS	sensor histidine kinase	13	P:GO:0000160; P:GO:0007165; P:GO:0016310; P:GO:0018106; P:GO:0051716; F:GO:0000155; F:GO:0000166; F:GO:0004673; F:GO:0016301; F:GO:0016740; F:GO:0016772; C:GO:0016020; C:GO:0016021	P:phosphorelay signal transduction system; P:signal transduction; P:phosphorylation; P:peptidyl-histidine phosphorylation; P:cellular response to stimulus; F:phosphorelay sensor kinase activity; F:nucleotide binding; F:protein histidine kinase activity; F:kinase activity; F:transferase activity; F:transferase activity, transferring phosphorus-containing groups; C:membrane; C:integral component of…	COG0642@1|root,COG0642@2|Bacteria,1QTSX@1224|Proteobacteria,2VQUI@28216|Betaproteobacteria,1K54W@119060|Burkholderiaceae	T	Histidine kinase	K07649	tctE; two-component system, OmpR family, sensor histidine kinase TctE	[EC:2.7.13.3]	Two-component system	Signal transduction	Environmental Information Processing	PF08521	Two-component sensor kinase N-terminal
NZ_CP052867	chromosome	chromosome:1	HJC54_RS14130	309000	310623	-	N	CDS	acid phosphatase	4	P:GO:0016311; F:GO:0003824; F:GO:0003993; F:GO:0016788	P:dephosphorylation; F:catalytic activity; F:acid phosphatase activity; F:hydrolase activity, acting on ester bonds	COG3511@1|root,COG3511@2|Bacteria,1MVNS@1224|Proteobacteria,2VMDC@28216|Betaproteobacteria,1KGU4@119060|Burkholderiaceae	M	acid phosphatase							PF04185	Phosphoesterase family
NZ_CP052867	chromosome	chromosome:1	HJC54_RS14135	310824	312255	+	N	CDS	cytochrome-c peroxidase	7	P:GO:0022900; P:GO:0098869; F:GO:0004601; F:GO:0009055; F:GO:0016491; F:GO:0020037; F:GO:0046872	P:electron transport chain; P:cellular oxidant detoxification; F:peroxidase activity; F:electron transfer activity; F:oxidoreductase activity; F:heme binding; F:metal ion binding	COG1858@1|root,COG1858@2|Bacteria,1MV70@1224|Proteobacteria,2VMKA@28216|Betaproteobacteria,1K05H@119060|Burkholderiaceae	C	cytochrome c peroxidase	K00428	E1.11.1.5; cytochrome c peroxidase	[EC:1.11.1.5]	Enzymes with EC numbers	Unclassified: metabolism	Not Included in Pathway or Brite	PF03150	Di-haem cytochrome c peroxidase
NZ_CP052867	chromosome	chromosome:1	HJC54_RS14140	312361	312574	+	N	CDS	hypothetical protein
NZ_CP052867	chromosome	chromosome:1	HJC54_RS14145	312579	313056	+	N	CDS	NUDIX hydrolase	1	F:GO:0016787	F:hydrolase activity	COG0494@1|root,COG0494@2|Bacteria,1NPFG@1224|Proteobacteria,2W2QA@28216|Betaproteobacteria,1K7KX@119060|Burkholderiaceae	L	Belongs to the Nudix hydrolase family							PF00293	NUDIX domain
NZ_CP052867	chromosome	chromosome:1	HJC54_RS14150	313136	314846	-	N	CDS	glutamine--tRNA ligase/YqeY domain fusion protein	12	P:GO:0006412; P:GO:0006418; P:GO:0006424; P:GO:0006425; P:GO:0043039; P:GO:0044267; F:GO:0000166; F:GO:0004812; F:GO:0004819; F:GO:0005524; F:GO:0016874; C:GO:0005737	P:translation; P:tRNA aminoacylation for protein translation; P:glutamyl-tRNA aminoacylation; P:glutaminyl-tRNA aminoacylation; P:tRNA aminoacylation; P:cellular protein metabolic process; F:nucleotide binding; F:aminoacyl-tRNA ligase activity; F:glutamine-tRNA ligase activity; F:ATP binding; F:ligase activity; C:cytoplasm	COG0008@1|root,COG0008@2|Bacteria,1MUC8@1224|Proteobacteria,2VHZX@28216|Betaproteobacteria,1K0F0@119060|Burkholderiaceae	J	glutaminyl-tRNA synthetase	K01886	QARS, glnS; glutaminyl-tRNA synthetase	[EC:6.1.1.18]	Aminoacyl-tRNA biosynthesis	Translation	Genetic Information Processing	PF00749	tRNA synthetases class I (E and Q), catalytic domain	-	6.1.1.-	CE8	2
NZ_CP052867	chromosome	chromosome:1	HJC54_RS14150	313136	314846	-	N	CDS	glutamine--tRNA ligase/YqeY domain fusion protein	12	P:GO:0006412; P:GO:0006418; P:GO:0006424; P:GO:0006425; P:GO:0043039; P:GO:0044267; F:GO:0000166; F:GO:0004812; F:GO:0004819; F:GO:0005524; F:GO:0016874; C:GO:0005737	P:translation; P:tRNA aminoacylation for protein translation; P:glutamyl-tRNA aminoacylation; P:glutaminyl-tRNA aminoacylation; P:tRNA aminoacylation; P:cellular protein metabolic process; F:nucleotide binding; F:aminoacyl-tRNA ligase activity; F:glutamine-tRNA ligase activity; F:ATP binding; F:ligase activity; C:cytoplasm	COG0008@1|root,COG0008@2|Bacteria,1MUC8@1224|Proteobacteria,2VHZX@28216|Betaproteobacteria,1K0F0@119060|Burkholderiaceae	J	glutaminyl-tRNA synthetase	K01886	QARS, glnS; glutaminyl-tRNA synthetase	[EC:6.1.1.18]	Aminoacyl-tRNA biosynthesis	Translation	Genetic Information Processing	PF03950	tRNA synthetases class I (E and Q), anti-codon binding domain	-	6.1.1.-	CE8	2
NZ_CP052867	chromosome	chromosome:1	HJC54_RS14155	315070	315280	+	N	CDS	ornithine acetyltransferase	1	F:GO:0016740	F:transferase activity	2DDEV@1|root,2ZHS1@2|Bacteria,1PBAB@1224|Proteobacteria,2WDQ6@28216|Betaproteobacteria,1KAS6@119060|Burkholderiaceae	-	-	K04062	osmB; osmotically inducible lipoprotein OsmB		Structural proteins	Unclassified: signaling and cellular processes	Not Included in Pathway or Brite
NZ_CP052867	chromosome	chromosome:1	HJC54_RS14160	315435	316656	-	N	CDS	CoA transferase	2	F:GO:0003824; F:GO:0016740	F:catalytic activity; F:transferase activity	COG1804@1|root,COG1804@2|Bacteria,1MU2K@1224|Proteobacteria,2VHFW@28216|Betaproteobacteria,1K0E9@119060|Burkholderiaceae	C	L-carnitine dehydratase bile acid-inducible protein F							PF02515	CoA-transferase family III	-	2.8.3.-	-	1
NZ_CP052867	chromosome	chromosome:1	HJC54_RS14165	317010	319635	+	N	CDS	alanine--tRNA ligase	14	P:GO:0006412; P:GO:0006419; P:GO:0043039; F:GO:0000049; F:GO:0000166; F:GO:0003676; F:GO:0003723; F:GO:0004812; F:GO:0004813; F:GO:0005524; F:GO:0008270; F:GO:0016874; F:GO:0046872; C:GO:0005737	P:translation; P:alanyl-tRNA aminoacylation; P:tRNA aminoacylation; F:tRNA binding; F:nucleotide binding; F:nucleic acid binding; F:RNA binding; F:aminoacyl-tRNA ligase activity; F:alanine-tRNA ligase activity; F:ATP binding; F:zinc ion binding; F:ligase activity; F:metal ion binding; C:cytoplasm	COG0013@1|root,COG0013@2|Bacteria,1MU9A@1224|Proteobacteria,2VH6Z@28216|Betaproteobacteria,1K06F@119060|Burkholderiaceae	J	Catalyzes the attachment of alanine to tRNA(Ala) in a two-step reaction alanine is first activated by ATP to form Ala- AMP and then transferred to the acceptor end of tRNA(Ala). Also edits incorrectly charged Ser-tRNA(Ala) and Gly-tRNA(Ala) via its editing domain	K01872	AARS, alaS; alanyl-tRNA synthetase	[EC:6.1.1.7]	Aminoacyl-tRNA biosynthesis	Translation	Genetic Information Processing	PF01411	tRNA synthetases class II (A)	-	6.1.1.-	-	1
NZ_CP052867	chromosome	chromosome:1	HJC54_RS14165	317010	319635	+	N	CDS	alanine--tRNA ligase	14	P:GO:0006412; P:GO:0006419; P:GO:0043039; F:GO:0000049; F:GO:0000166; F:GO:0003676; F:GO:0003723; F:GO:0004812; F:GO:0004813; F:GO:0005524; F:GO:0008270; F:GO:0016874; F:GO:0046872; C:GO:0005737	P:translation; P:alanyl-tRNA aminoacylation; P:tRNA aminoacylation; F:tRNA binding; F:nucleotide binding; F:nucleic acid binding; F:RNA binding; F:aminoacyl-tRNA ligase activity; F:alanine-tRNA ligase activity; F:ATP binding; F:zinc ion binding; F:ligase activity; F:metal ion binding; C:cytoplasm	COG0013@1|root,COG0013@2|Bacteria,1MU9A@1224|Proteobacteria,2VH6Z@28216|Betaproteobacteria,1K06F@119060|Burkholderiaceae	J	Catalyzes the attachment of alanine to tRNA(Ala) in a two-step reaction alanine is first activated by ATP to form Ala- AMP and then transferred to the acceptor end of tRNA(Ala). Also edits incorrectly charged Ser-tRNA(Ala) and Gly-tRNA(Ala) via its editing domain	K01872	AARS, alaS; alanyl-tRNA synthetase	[EC:6.1.1.7]	Aminoacyl-tRNA biosynthesis	Translation	Genetic Information Processing	PF02272	DHHA1 domain	-	6.1.1.-	-	1
NZ_CP052867	chromosome	chromosome:1	HJC54_RS14165	317010	319635	+	N	CDS	alanine--tRNA ligase	14	P:GO:0006412; P:GO:0006419; P:GO:0043039; F:GO:0000049; F:GO:0000166; F:GO:0003676; F:GO:0003723; F:GO:0004812; F:GO:0004813; F:GO:0005524; F:GO:0008270; F:GO:0016874; F:GO:0046872; C:GO:0005737	P:translation; P:alanyl-tRNA aminoacylation; P:tRNA aminoacylation; F:tRNA binding; F:nucleotide binding; F:nucleic acid binding; F:RNA binding; F:aminoacyl-tRNA ligase activity; F:alanine-tRNA ligase activity; F:ATP binding; F:zinc ion binding; F:ligase activity; F:metal ion binding; C:cytoplasm	COG0013@1|root,COG0013@2|Bacteria,1MU9A@1224|Proteobacteria,2VH6Z@28216|Betaproteobacteria,1K06F@119060|Burkholderiaceae	J	Catalyzes the attachment of alanine to tRNA(Ala) in a two-step reaction alanine is first activated by ATP to form Ala- AMP and then transferred to the acceptor end of tRNA(Ala). Also edits incorrectly charged Ser-tRNA(Ala) and Gly-tRNA(Ala) via its editing domain	K01872	AARS, alaS; alanyl-tRNA synthetase	[EC:6.1.1.7]	Aminoacyl-tRNA biosynthesis	Translation	Genetic Information Processing	PF07973	Threonyl and Alanyl tRNA synthetase second additional domain	-	6.1.1.-	-	1
NZ_CP052867	chromosome	chromosome:1	HJC54_RS14170	320104	320311	+	N	CDS	hypothetical protein				2AF1F@1|root,314ZU@2|Bacteria,1PUYD@1224|Proteobacteria,2WAZT@28216|Betaproteobacteria,1K4QI@119060|Burkholderiaceae	-	-
NZ_CP052867	chromosome	chromosome:1	HJC54_RS14175	320479	320821	-	N	CDS	Crystal protein ET79	1	P:GO:0019836	P:hemolysis by symbiont of host erythrocytes	2EH4V@1|root,33AWR@2|Bacteria,1P77S@1224|Proteobacteria	-	-							PF06355	Aegerolysin
NZ_CP052867	chromosome	chromosome:1	HJC54_RS14180	321236	321644	-	N	CDS	hypothetical protein	2	P:GO:0006355; F:GO:0003700	P:regulation of transcription, DNA-templated; F:DNA-binding transcription factor activity	COG0583@1|root,COG0583@2|Bacteria,1MU2E@1224|Proteobacteria,1RYH0@1236|Gammaproteobacteria,40336@613|Serratia	K	LysR substrate binding domain
NZ_CP052867	chromosome	chromosome:1	HJC54_RS29410	321851	322379	+	N	CDS	hypothetical protein	1	F:GO:0016491	F:oxidoreductase activity	COG1012@1|root,COG1012@2|Bacteria,1MU1V@1224|Proteobacteria,2VHQD@28216|Betaproteobacteria,1K09N@119060|Burkholderiaceae	C	Aldehyde dehydrogenase
NZ_CP052867	chromosome	chromosome:1	HJC54_RS14190	322454	323525	-	N	CDS	galactose mutarotase	6	P:GO:0005975; P:GO:0019318; F:GO:0003824; F:GO:0004034; F:GO:0016853; F:GO:0030246	P:carbohydrate metabolic process; P:hexose metabolic process; F:catalytic activity; F:aldose 1-epimerase activity; F:isomerase activity; F:carbohydrate binding	COG2017@1|root,COG2017@2|Bacteria,1MVMN@1224|Proteobacteria,2VMIA@28216|Betaproteobacteria,1KFP4@119060|Burkholderiaceae	G	Converts alpha-aldose to the beta-anomer	K01785	galM, GALM; aldose 1-epimerase	[EC:5.1.3.3]	Glycolysis / Gluconeogenesis	Carbohydrate metabolism	Metabolism	PF01263	Aldose 1-epimerase
NZ_CP052867	chromosome	chromosome:1	HJC54_RS14190	322454	323525	-	N	CDS	galactose mutarotase	6	P:GO:0005975; P:GO:0019318; F:GO:0003824; F:GO:0004034; F:GO:0016853; F:GO:0030246	P:carbohydrate metabolic process; P:hexose metabolic process; F:catalytic activity; F:aldose 1-epimerase activity; F:isomerase activity; F:carbohydrate binding	COG2017@1|root,COG2017@2|Bacteria,1MVMN@1224|Proteobacteria,2VMIA@28216|Betaproteobacteria,1KFP4@119060|Burkholderiaceae	G	Converts alpha-aldose to the beta-anomer	K01785	galM, GALM; aldose 1-epimerase	[EC:5.1.3.3]	Galactose metabolism	Carbohydrate metabolism	Metabolism	PF01263	Aldose 1-epimerase
NZ_CP052867	chromosome	chromosome:1	HJC54_RS14200	325061	326090	+	N	CDS	D-xylose ABC transporter substrate-binding protein	4	P:GO:0015753; F:GO:0016787; F:GO:0048029; C:GO:0042597	P:D-xylose transmembrane transport; F:hydrolase activity; F:monosaccharide binding; C:periplasmic space	COG4213@1|root,COG4213@2|Bacteria,1MX63@1224|Proteobacteria,2VH7R@28216|Betaproteobacteria,1K1SC@119060|Burkholderiaceae	G	PFAM periplasmic binding protein LacI transcriptional regulator	K10543	xylF; D-xylose transport system substrate-binding protein		ABC transporters	Membrane transport	Environmental Information Processing	PF13407	Periplasmic binding protein domain								Q2YJE8	reduced virulence
NZ_CP052867	chromosome	chromosome:1	HJC54_RS14205	326178	327738	+	N	CDS	D-xylose ABC transporter ATP-binding protein	7	P:GO:0015753; F:GO:0000166; F:GO:0005524; F:GO:0015614; F:GO:0016787; C:GO:0005886; C:GO:0016020	P:D-xylose transmembrane transport; F:nucleotide binding; F:ATP binding; F:ABC-type D-xylose transporter activity; F:hydrolase activity; C:plasma membrane; C:membrane	COG1129@1|root,COG1129@2|Bacteria,1MU22@1224|Proteobacteria,2VHRA@28216|Betaproteobacteria,1JZXK@119060|Burkholderiaceae	P	import. Responsible for energy coupling to the transport system	K10545	xylG; D-xylose transport system ATP-binding protein	[EC:7.5.2.10]	ABC transporters	Membrane transport	Environmental Information Processing	PF00005	ABC transporter	-	3.6.3.-	-	1
NZ_CP052867	chromosome	chromosome:1	HJC54_RS14210	327734	328937	+	N	CDS	sugar ABC transporter permease	6	P:GO:0055085; F:GO:0016787; F:GO:0022857; C:GO:0005886; C:GO:0016020; C:GO:0016021	P:transmembrane transport; F:hydrolase activity; F:transmembrane transporter activity; C:plasma membrane; C:membrane; C:integral component of membrane	COG4214@1|root,COG4214@2|Bacteria,1MXXS@1224|Proteobacteria,2VNJR@28216|Betaproteobacteria,1K08Q@119060|Burkholderiaceae	G	Belongs to the binding-protein-dependent transport system permease family	K10544	xylH; D-xylose transport system permease protein		ABC transporters	Membrane transport	Environmental Information Processing	PF02653	Branched-chain amino acid transport system / permease component
NZ_CP052867	chromosome	chromosome:1	HJC54_RS14215	328998	329766	+	N	CDS	SDR family oxidoreductase	1	F:GO:0016491	F:oxidoreductase activity	COG1028@1|root,COG1028@2|Bacteria,1MXTP@1224|Proteobacteria,2VJJN@28216|Betaproteobacteria,1K2N2@119060|Burkholderiaceae	IQ	Enoyl-(Acyl carrier protein) reductase	K22185	xylB; D-xylose 1-dehydrogenase	[EC:1.1.1.175]	Pentose and glucuronate interconversions	Carbohydrate metabolism	Metabolism	PF13561	Enoyl-(Acyl carrier protein) reductase
NZ_CP052867	chromosome	chromosome:1	HJC54_RS14220	329762	330656	+	N	CDS	SMP-30/gluconolactonase/LRE family protein				COG3386@1|root,COG3386@2|Bacteria,1MWTR@1224|Proteobacteria,2VMAD@28216|Betaproteobacteria,1K3ID@119060|Burkholderiaceae	G	SMP-30/Gluconolaconase/LRE-like region	K14274	xylC; xylono-1,5-lactonase	[EC:3.1.1.110]	Pentose and glucuronate interconversions	Carbohydrate metabolism	Metabolism	PF08450	SMP-30/Gluconolactonase/LRE-like region
NZ_CP052867	chromosome	chromosome:1	HJC54_RS14225	330803	331340	+	N	CDS	NUDIX domain-containing protein	3	F:GO:0003824; F:GO:0016787; F:GO:0047631	F:catalytic activity; F:hydrolase activity; F:ADP-ribose diphosphatase activity	COG2816@1|root,COG2816@2|Bacteria,1REUJ@1224|Proteobacteria,2VRF4@28216|Betaproteobacteria,1K23S@119060|Burkholderiaceae	L	PFAM NUDIX hydrolase	K03426	E3.6.1.22, NUDT12, nudC; NAD+ diphosphatase	[EC:3.6.1.22]	Nicotinate and nicotinamide metabolism	Metabolism of cofactors and vitamins	Metabolism	PF00293	NUDIX domain
NZ_CP052867	chromosome	chromosome:1	HJC54_RS14225	330803	331340	+	N	CDS	NUDIX domain-containing protein	3	F:GO:0003824; F:GO:0016787; F:GO:0047631	F:catalytic activity; F:hydrolase activity; F:ADP-ribose diphosphatase activity	COG2816@1|root,COG2816@2|Bacteria,1REUJ@1224|Proteobacteria,2VRF4@28216|Betaproteobacteria,1K23S@119060|Burkholderiaceae	L	PFAM NUDIX hydrolase	K03426	E3.6.1.22, NUDT12, nudC; NAD+ diphosphatase	[EC:3.6.1.22]	Peroxisome	Transport and catabolism	Cellular Processes	PF00293	NUDIX domain
NZ_CP052867	chromosome	chromosome:1	HJC54_RS14230	331365	331707	-	N	CDS	YbjQ family protein				COG0393@1|root,COG0393@2|Bacteria,1N2F5@1224|Proteobacteria,2VTIY@28216|Betaproteobacteria,1K8UA@119060|Burkholderiaceae	S	Belongs to the UPF0145 family							PF01906	Putative heavy-metal-binding
NZ_CP052867	chromosome	chromosome:1	HJC54_RS14235	331967	332429	+	N	CDS	acyl-CoA thioesterase				COG0824@1|root,COG0824@2|Bacteria,1RGZN@1224|Proteobacteria,2VREZ@28216|Betaproteobacteria,1K703@119060|Burkholderiaceae	S	PFAM thioesterase superfamily protein	K07107	ybgC; acyl-CoA thioester hydrolase	[EC:3.1.2.-]	Enzymes with EC numbers	Unclassified: metabolism	Not Included in Pathway or Brite	PF03061	Thioesterase superfamily
NZ_CP052867	chromosome	chromosome:1	HJC54_RS14240	332477	333347	-	N	CDS	5-deoxy-glucuronate isomerase	4	P:GO:0019310; F:GO:0008880; F:GO:0016853; F:GO:0016861	P:inositol catabolic process; F:glucuronate isomerase activity; F:isomerase activity; F:intramolecular oxidoreductase activity, interconverting aldoses and ketoses	COG3718@1|root,COG3718@2|Bacteria,1MWGD@1224|Proteobacteria,2VIHK@28216|Betaproteobacteria,1K2F8@119060|Burkholderiaceae	G	PFAM Myo-inositol catabolism IolB domain protein	K03337	iolB; 5-deoxy-glucuronate isomerase	[EC:5.3.1.30]	Inositol phosphate metabolism	Carbohydrate metabolism	Metabolism	PF04962	KduI/IolB family	-	5.3.1.-	-	1
NZ_CP052867	chromosome	chromosome:1	HJC54_RS14245	333346	334264	-	N	CDS	myo-inosose-2 dehydratase	2	F:GO:0016829; F:GO:0050114	F:lyase activity; F:myo-inosose-2 dehydratase activity	COG1082@1|root,COG1082@2|Bacteria,1MUQ0@1224|Proteobacteria,2W0MJ@28216|Betaproteobacteria,1K31C@119060|Burkholderiaceae	G	Xylose isomerase	K03335	iolE; inosose dehydratase	[EC:4.2.1.44]	Inositol phosphate metabolism	Carbohydrate metabolism	Metabolism	PF01261	Xylose isomerase-like TIM barrel	-	4.2.1.-	-	1
NZ_CP052867	chromosome	chromosome:1	HJC54_RS14250	334260	336291	-	N	CDS	3D-(3,5/4)-trihydroxycyclohexane-1,2-dione acylhydrolase (decyclizing)	7	P:GO:0019310; P:GO:0044281; F:GO:0000287; F:GO:0003824; F:GO:0016787; F:GO:0016823; F:GO:0030976	P:inositol catabolic process; P:small molecule metabolic process; F:magnesium ion binding; F:catalytic activity; F:hydrolase activity; F:hydrolase activity, acting on acid carbon-carbon bonds, in ketonic substances; F:thiamine pyrophosphate binding	COG3962@1|root,COG3962@2|Bacteria,1MW0P@1224|Proteobacteria,2VP1K@28216|Betaproteobacteria,1JZQ1@119060|Burkholderiaceae	E	Belongs to the TPP enzyme family	K03336	iolD; 3D-(3,5/4)-trihydroxycyclohexane-1,2-dione acylhydrolase (decyclizing)	[EC:3.7.1.22]	Inositol phosphate metabolism	Carbohydrate metabolism	Metabolism	PF02776	Thiamine pyrophosphate enzyme, N-terminal TPP binding domain	-	3.7.1.-	-	1
NZ_CP052867	chromosome	chromosome:1	HJC54_RS14250	334260	336291	-	N	CDS	3D-(3,5/4)-trihydroxycyclohexane-1,2-dione acylhydrolase (decyclizing)	7	P:GO:0019310; P:GO:0044281; F:GO:0000287; F:GO:0003824; F:GO:0016787; F:GO:0016823; F:GO:0030976	P:inositol catabolic process; P:small molecule metabolic process; F:magnesium ion binding; F:catalytic activity; F:hydrolase activity; F:hydrolase activity, acting on acid carbon-carbon bonds, in ketonic substances; F:thiamine pyrophosphate binding	COG3962@1|root,COG3962@2|Bacteria,1MW0P@1224|Proteobacteria,2VP1K@28216|Betaproteobacteria,1JZQ1@119060|Burkholderiaceae	E	Belongs to the TPP enzyme family	K03336	iolD; 3D-(3,5/4)-trihydroxycyclohexane-1,2-dione acylhydrolase (decyclizing)	[EC:3.7.1.22]	Inositol phosphate metabolism	Carbohydrate metabolism	Metabolism	PF00205	Thiamine pyrophosphate enzyme, central domain	-	3.7.1.-	-	1
NZ_CP052867	chromosome	chromosome:1	HJC54_RS14250	334260	336291	-	N	CDS	3D-(3,5/4)-trihydroxycyclohexane-1,2-dione acylhydrolase (decyclizing)	7	P:GO:0019310; P:GO:0044281; F:GO:0000287; F:GO:0003824; F:GO:0016787; F:GO:0016823; F:GO:0030976	P:inositol catabolic process; P:small molecule metabolic process; F:magnesium ion binding; F:catalytic activity; F:hydrolase activity; F:hydrolase activity, acting on acid carbon-carbon bonds, in ketonic substances; F:thiamine pyrophosphate binding	COG3962@1|root,COG3962@2|Bacteria,1MW0P@1224|Proteobacteria,2VP1K@28216|Betaproteobacteria,1JZQ1@119060|Burkholderiaceae	E	Belongs to the TPP enzyme family	K03336	iolD; 3D-(3,5/4)-trihydroxycyclohexane-1,2-dione acylhydrolase (decyclizing)	[EC:3.7.1.22]	Inositol phosphate metabolism	Carbohydrate metabolism	Metabolism	PF02775	Thiamine pyrophosphate enzyme, C-terminal TPP binding domain	-	3.7.1.-	-	1
NZ_CP052867	chromosome	chromosome:1	HJC54_RS14255	336302	338279	-	N	CDS	5-dehydro-2-deoxygluconokinase	7	P:GO:0016310; F:GO:0003824; F:GO:0016301; F:GO:0016740; F:GO:0016772; F:GO:0016773; F:GO:0047590	P:phosphorylation; F:catalytic activity; F:kinase activity; F:transferase activity; F:transferase activity, transferring phosphorus-containing groups; F:phosphotransferase activity, alcohol group as acceptor; F:5-dehydro-2-deoxygluconokinase activity	COG0524@1|root,COG3892@1|root,COG0524@2|Bacteria,COG3892@2|Bacteria,1MV6I@1224|Proteobacteria,2VMV5@28216|Betaproteobacteria,1K1MF@119060|Burkholderiaceae	G	PfkB domain protein	K03338	iolC; 5-dehydro-2-deoxygluconokinase	[EC:2.7.1.92]	Inositol phosphate metabolism	Carbohydrate metabolism	Metabolism	PF00294	pfkB family carbohydrate kinase
NZ_CP052867	chromosome	chromosome:1	HJC54_RS14255	336302	338279	-	N	CDS	5-dehydro-2-deoxygluconokinase	7	P:GO:0016310; F:GO:0003824; F:GO:0016301; F:GO:0016740; F:GO:0016772; F:GO:0016773; F:GO:0047590	P:phosphorylation; F:catalytic activity; F:kinase activity; F:transferase activity; F:transferase activity, transferring phosphorus-containing groups; F:phosphotransferase activity, alcohol group as acceptor; F:5-dehydro-2-deoxygluconokinase activity	COG0524@1|root,COG3892@1|root,COG0524@2|Bacteria,COG3892@2|Bacteria,1MV6I@1224|Proteobacteria,2VMV5@28216|Betaproteobacteria,1K1MF@119060|Burkholderiaceae	G	PfkB domain protein	K03338	iolC; 5-dehydro-2-deoxygluconokinase	[EC:2.7.1.92]	Inositol phosphate metabolism	Carbohydrate metabolism	Metabolism	PF09863	Uncharacterized protein conserved in bacteria (DUF2090)
NZ_CP052867	chromosome	chromosome:1	HJC54_RS14275	341715	342594	+	N	CDS	MurR/RpiR family transcriptional regulator	7	P:GO:0006096; P:GO:0006355; P:GO:1901135; F:GO:0003700; F:GO:0097367; C:GO:0016020; C:GO:0016021	P:glycolytic process; P:regulation of transcription, DNA-templated; P:carbohydrate derivative metabolic process; F:DNA-binding transcription factor activity; F:carbohydrate derivative binding; C:membrane; C:integral component of membrane	COG1737@1|root,COG1737@2|Bacteria,1MW2B@1224|Proteobacteria,2VPMG@28216|Betaproteobacteria,1K55T@119060|Burkholderiaceae	K	Transcriptional regulator, RpiR family							PF01380	SIS domain
NZ_CP052867	chromosome	chromosome:1	HJC54_RS14275	341715	342594	+	N	CDS	MurR/RpiR family transcriptional regulator	7	P:GO:0006096; P:GO:0006355; P:GO:1901135; F:GO:0003700; F:GO:0097367; C:GO:0016020; C:GO:0016021	P:glycolytic process; P:regulation of transcription, DNA-templated; P:carbohydrate derivative metabolic process; F:DNA-binding transcription factor activity; F:carbohydrate derivative binding; C:membrane; C:integral component of membrane	COG1737@1|root,COG1737@2|Bacteria,1MW2B@1224|Proteobacteria,2VPMG@28216|Betaproteobacteria,1K55T@119060|Burkholderiaceae	K	Transcriptional regulator, RpiR family							PF01418	Helix-turn-helix domain, rpiR family
NZ_CP052867	chromosome	chromosome:1	HJC54_RS14280	342586	343615	+	N	CDS	inositol 2-dehydrogenase	3	F:GO:0000166; F:GO:0016491; F:GO:0050112	F:nucleotide binding; F:oxidoreductase activity; F:inositol 2-dehydrogenase activity	COG0673@1|root,COG0673@2|Bacteria,1MV7C@1224|Proteobacteria,2VKZT@28216|Betaproteobacteria,1K3AZ@119060|Burkholderiaceae	S	PFAM oxidoreductase domain protein	K00010	iolG; myo-inositol 2-dehydrogenase / D-chiro-inositol 1-dehydrogenase	[EC:1.1.1.18 1.1.1.369]	Inositol phosphate metabolism	Carbohydrate metabolism	Metabolism	PF02894	Oxidoreductase family, C-terminal alpha/beta domain
NZ_CP052867	chromosome	chromosome:1	HJC54_RS14280	342586	343615	+	N	CDS	inositol 2-dehydrogenase	3	F:GO:0000166; F:GO:0016491; F:GO:0050112	F:nucleotide binding; F:oxidoreductase activity; F:inositol 2-dehydrogenase activity	COG0673@1|root,COG0673@2|Bacteria,1MV7C@1224|Proteobacteria,2VKZT@28216|Betaproteobacteria,1K3AZ@119060|Burkholderiaceae	S	PFAM oxidoreductase domain protein	K00010	iolG; myo-inositol 2-dehydrogenase / D-chiro-inositol 1-dehydrogenase	[EC:1.1.1.18 1.1.1.369]	Inositol phosphate metabolism	Carbohydrate metabolism	Metabolism	PF01408	Oxidoreductase family, NAD-binding Rossmann fold
NZ_CP052867	chromosome	chromosome:1	HJC54_RS14280	342586	343615	+	N	CDS	inositol 2-dehydrogenase	3	F:GO:0000166; F:GO:0016491; F:GO:0050112	F:nucleotide binding; F:oxidoreductase activity; F:inositol 2-dehydrogenase activity	COG0673@1|root,COG0673@2|Bacteria,1MV7C@1224|Proteobacteria,2VKZT@28216|Betaproteobacteria,1K3AZ@119060|Burkholderiaceae	S	PFAM oxidoreductase domain protein	K00010	iolG; myo-inositol 2-dehydrogenase / D-chiro-inositol 1-dehydrogenase	[EC:1.1.1.18 1.1.1.369]	Streptomycin biosynthesis	Biosynthesis of other secondary metabolites	Metabolism	PF02894	Oxidoreductase family, C-terminal alpha/beta domain
NZ_CP052867	chromosome	chromosome:1	HJC54_RS14280	342586	343615	+	N	CDS	inositol 2-dehydrogenase	3	F:GO:0000166; F:GO:0016491; F:GO:0050112	F:nucleotide binding; F:oxidoreductase activity; F:inositol 2-dehydrogenase activity	COG0673@1|root,COG0673@2|Bacteria,1MV7C@1224|Proteobacteria,2VKZT@28216|Betaproteobacteria,1K3AZ@119060|Burkholderiaceae	S	PFAM oxidoreductase domain protein	K00010	iolG; myo-inositol 2-dehydrogenase / D-chiro-inositol 1-dehydrogenase	[EC:1.1.1.18 1.1.1.369]	Streptomycin biosynthesis	Biosynthesis of other secondary metabolites	Metabolism	PF01408	Oxidoreductase family, NAD-binding Rossmann fold
NZ_CP052867	chromosome	chromosome:1	HJC54_RS14285	343626	344667	+	N	CDS	Gfo/Idh/MocA family oxidoreductase	1	F:GO:0000166	F:nucleotide binding	COG0673@1|root,COG0673@2|Bacteria,1R4CJ@1224|Proteobacteria,2VJ7B@28216|Betaproteobacteria,1K0AK@119060|Burkholderiaceae	S	oxidoreductase	K00010	iolG; myo-inositol 2-dehydrogenase / D-chiro-inositol 1-dehydrogenase	[EC:1.1.1.18 1.1.1.369]	Inositol phosphate metabolism	Carbohydrate metabolism	Metabolism	PF01408	Oxidoreductase family, NAD-binding Rossmann fold	-	-	GH0	1
NZ_CP052867	chromosome	chromosome:1	HJC54_RS14285	343626	344667	+	N	CDS	Gfo/Idh/MocA family oxidoreductase	1	F:GO:0000166	F:nucleotide binding	COG0673@1|root,COG0673@2|Bacteria,1R4CJ@1224|Proteobacteria,2VJ7B@28216|Betaproteobacteria,1K0AK@119060|Burkholderiaceae	S	oxidoreductase	K00010	iolG; myo-inositol 2-dehydrogenase / D-chiro-inositol 1-dehydrogenase	[EC:1.1.1.18 1.1.1.369]	Inositol phosphate metabolism	Carbohydrate metabolism	Metabolism	PF02894	Oxidoreductase family, C-terminal alpha/beta domain	-	-	GH0	1
NZ_CP052867	chromosome	chromosome:1	HJC54_RS14285	343626	344667	+	N	CDS	Gfo/Idh/MocA family oxidoreductase	1	F:GO:0000166	F:nucleotide binding	COG0673@1|root,COG0673@2|Bacteria,1R4CJ@1224|Proteobacteria,2VJ7B@28216|Betaproteobacteria,1K0AK@119060|Burkholderiaceae	S	oxidoreductase	K00010	iolG; myo-inositol 2-dehydrogenase / D-chiro-inositol 1-dehydrogenase	[EC:1.1.1.18 1.1.1.369]	Streptomycin biosynthesis	Biosynthesis of other secondary metabolites	Metabolism	PF01408	Oxidoreductase family, NAD-binding Rossmann fold	-	-	GH0	1
NZ_CP052867	chromosome	chromosome:1	HJC54_RS14285	343626	344667	+	N	CDS	Gfo/Idh/MocA family oxidoreductase	1	F:GO:0000166	F:nucleotide binding	COG0673@1|root,COG0673@2|Bacteria,1R4CJ@1224|Proteobacteria,2VJ7B@28216|Betaproteobacteria,1K0AK@119060|Burkholderiaceae	S	oxidoreductase	K00010	iolG; myo-inositol 2-dehydrogenase / D-chiro-inositol 1-dehydrogenase	[EC:1.1.1.18 1.1.1.369]	Streptomycin biosynthesis	Biosynthesis of other secondary metabolites	Metabolism	PF02894	Oxidoreductase family, C-terminal alpha/beta domain	-	-	GH0	1
NZ_CP052867	chromosome	chromosome:1	HJC54_RS14290	344824	345052	+	N	CDS	sulfurtransferase TusA family protein	1	F:GO:0016740	F:transferase activity	COG0425@1|root,COG0425@2|Bacteria,1MZA5@1224|Proteobacteria,2VVW5@28216|Betaproteobacteria,1K98X@119060|Burkholderiaceae	O	Belongs to the sulfur carrier protein TusA family	K04085	tusA, sirA; tRNA 2-thiouridine synthesizing protein A	[EC:2.8.1.-]	Sulfur relay system	Folding, sorting and degradation	Genetic Information Processing	PF01206	Sulfurtransferase TusA
NZ_CP052867	chromosome	chromosome:1	HJC54_RS14295	345865	346570	+	N	CDS	response regulator transcription factor	3	P:GO:0000160; P:GO:0006355; F:GO:0003677	P:phosphorelay signal transduction system; P:regulation of transcription, DNA-templated; F:DNA binding	COG0745@1|root,COG0745@2|Bacteria,1RBJ1@1224|Proteobacteria,2VMZX@28216|Betaproteobacteria,1K0Z5@119060|Burkholderiaceae	K	response regulator							PF00486	Transcriptional regulatory protein, C terminal
NZ_CP052867	chromosome	chromosome:1	HJC54_RS14295	345865	346570	+	N	CDS	response regulator transcription factor	3	P:GO:0000160; P:GO:0006355; F:GO:0003677	P:phosphorelay signal transduction system; P:regulation of transcription, DNA-templated; F:DNA binding	COG0745@1|root,COG0745@2|Bacteria,1RBJ1@1224|Proteobacteria,2VMZX@28216|Betaproteobacteria,1K0Z5@119060|Burkholderiaceae	K	response regulator							PF00072	Response regulator receiver domain
NZ_CP052867	chromosome	chromosome:1	HJC54_RS14300	346566	348015	+	N	CDS	FecR domain-containing protein				COG1652@1|root,COG4254@1|root,COG1652@2|Bacteria,COG4254@2|Bacteria,1NKA2@1224|Proteobacteria,2VMS2@28216|Betaproteobacteria,1K26R@119060|Burkholderiaceae	M	FecR protein							PF04773	FecR protein	-	-	CBM50	1
NZ_CP052867	chromosome	chromosome:1	HJC54_RS14305	348023	350474	+	N	CDS	CHASE2 domain-containing protein	10	P:GO:0000160; P:GO:0007165; P:GO:0016310; P:GO:0018106; F:GO:0000155; F:GO:0004673; F:GO:0016301; F:GO:0016772; C:GO:0016020; C:GO:0016021	P:phosphorelay signal transduction system; P:signal transduction; P:phosphorylation; P:peptidyl-histidine phosphorylation; F:phosphorelay sensor kinase activity; F:protein histidine kinase activity; F:kinase activity; F:transferase activity, transferring phosphorus-containing groups; C:membrane; C:integral component of membrane	COG4252@1|root,COG5002@1|root,COG4252@2|Bacteria,COG5002@2|Bacteria,1MUHS@1224|Proteobacteria,2VIGN@28216|Betaproteobacteria,1K0N9@119060|Burkholderiaceae	T	Histidine kinase							PF08448	PAS fold
NZ_CP052867	chromosome	chromosome:1	HJC54_RS14305	348023	350474	+	N	CDS	CHASE2 domain-containing protein	10	P:GO:0000160; P:GO:0007165; P:GO:0016310; P:GO:0018106; F:GO:0000155; F:GO:0004673; F:GO:0016301; F:GO:0016772; C:GO:0016020; C:GO:0016021	P:phosphorelay signal transduction system; P:signal transduction; P:phosphorylation; P:peptidyl-histidine phosphorylation; F:phosphorelay sensor kinase activity; F:protein histidine kinase activity; F:kinase activity; F:transferase activity, transferring phosphorus-containing groups; C:membrane; C:integral component of membrane	COG4252@1|root,COG5002@1|root,COG4252@2|Bacteria,COG5002@2|Bacteria,1MUHS@1224|Proteobacteria,2VIGN@28216|Betaproteobacteria,1K0N9@119060|Burkholderiaceae	T	Histidine kinase							PF02518	Histidine kinase-, DNA gyrase B-, and HSP90-like ATPase
NZ_CP052867	chromosome	chromosome:1	HJC54_RS14305	348023	350474	+	N	CDS	CHASE2 domain-containing protein	10	P:GO:0000160; P:GO:0007165; P:GO:0016310; P:GO:0018106; F:GO:0000155; F:GO:0004673; F:GO:0016301; F:GO:0016772; C:GO:0016020; C:GO:0016021	P:phosphorelay signal transduction system; P:signal transduction; P:phosphorylation; P:peptidyl-histidine phosphorylation; F:phosphorelay sensor kinase activity; F:protein histidine kinase activity; F:kinase activity; F:transferase activity, transferring phosphorus-containing groups; C:membrane; C:integral component of membrane	COG4252@1|root,COG5002@1|root,COG4252@2|Bacteria,COG5002@2|Bacteria,1MUHS@1224|Proteobacteria,2VIGN@28216|Betaproteobacteria,1K0N9@119060|Burkholderiaceae	T	Histidine kinase							PF05226	CHASE2 domain
NZ_CP052867	chromosome	chromosome:1	HJC54_RS14310	350551	351166	+	N	CDS	DUF4136 domain-containing protein				2AFXH@1|root,31611@2|Bacteria,1PWPK@1224|Proteobacteria,2WC7W@28216|Betaproteobacteria,1K7BF@119060|Burkholderiaceae	S	Domain of unknown function (DUF4136)							PF13590	Domain of unknown function (DUF4136)
NZ_CP052867	chromosome	chromosome:1	HJC54_RS14315	351439	353305	+	N	CDS	hypothetical protein				2AMYS@1|root,31CVX@2|Bacteria,1Q9RU@1224|Proteobacteria,2W6UM@28216|Betaproteobacteria,1KCRU@119060|Burkholderiaceae	-	-
NZ_CP052867	chromosome	chromosome:1	HJC54_RS14320	353448	354330	-	N	CDS	UTP--glucose-1-phosphate uridylyltransferase GalU	5	P:GO:0006011; P:GO:0009058; F:GO:0003983; F:GO:0016740; F:GO:0016779	P:UDP-glucose metabolic process; P:biosynthetic process; F:UTP:glucose-1-phosphate uridylyltransferase activity; F:transferase activity; F:nucleotidyltransferase activity	COG1210@1|root,COG1210@2|Bacteria,1MV5F@1224|Proteobacteria,2VH00@28216|Betaproteobacteria,1K05P@119060|Burkholderiaceae	M	UTP-glucose-1-phosphate uridylyltransferase	K00963	UGP2, galU, galF; UTP--glucose-1-phosphate uridylyltransferase	[EC:2.7.7.9]	Pentose and glucuronate interconversions	Carbohydrate metabolism	Metabolism	PF00483	Nucleotidyl transferase	-	2.7.7.-	-	1
NZ_CP052867	chromosome	chromosome:1	HJC54_RS14320	353448	354330	-	N	CDS	UTP--glucose-1-phosphate uridylyltransferase GalU	5	P:GO:0006011; P:GO:0009058; F:GO:0003983; F:GO:0016740; F:GO:0016779	P:UDP-glucose metabolic process; P:biosynthetic process; F:UTP:glucose-1-phosphate uridylyltransferase activity; F:transferase activity; F:nucleotidyltransferase activity	COG1210@1|root,COG1210@2|Bacteria,1MV5F@1224|Proteobacteria,2VH00@28216|Betaproteobacteria,1K05P@119060|Burkholderiaceae	M	UTP-glucose-1-phosphate uridylyltransferase	K00963	UGP2, galU, galF; UTP--glucose-1-phosphate uridylyltransferase	[EC:2.7.7.9]	Galactose metabolism	Carbohydrate metabolism	Metabolism	PF00483	Nucleotidyl transferase	-	2.7.7.-	-	1
NZ_CP052867	chromosome	chromosome:1	HJC54_RS14320	353448	354330	-	N	CDS	UTP--glucose-1-phosphate uridylyltransferase GalU	5	P:GO:0006011; P:GO:0009058; F:GO:0003983; F:GO:0016740; F:GO:0016779	P:UDP-glucose metabolic process; P:biosynthetic process; F:UTP:glucose-1-phosphate uridylyltransferase activity; F:transferase activity; F:nucleotidyltransferase activity	COG1210@1|root,COG1210@2|Bacteria,1MV5F@1224|Proteobacteria,2VH00@28216|Betaproteobacteria,1K05P@119060|Burkholderiaceae	M	UTP-glucose-1-phosphate uridylyltransferase	K00963	UGP2, galU, galF; UTP--glucose-1-phosphate uridylyltransferase	[EC:2.7.7.9]	Starch and sucrose metabolism	Carbohydrate metabolism	Metabolism	PF00483	Nucleotidyl transferase	-	2.7.7.-	-	1
NZ_CP052867	chromosome	chromosome:1	HJC54_RS14320	353448	354330	-	N	CDS	UTP--glucose-1-phosphate uridylyltransferase GalU	5	P:GO:0006011; P:GO:0009058; F:GO:0003983; F:GO:0016740; F:GO:0016779	P:UDP-glucose metabolic process; P:biosynthetic process; F:UTP:glucose-1-phosphate uridylyltransferase activity; F:transferase activity; F:nucleotidyltransferase activity	COG1210@1|root,COG1210@2|Bacteria,1MV5F@1224|Proteobacteria,2VH00@28216|Betaproteobacteria,1K05P@119060|Burkholderiaceae	M	UTP-glucose-1-phosphate uridylyltransferase	K00963	UGP2, galU, galF; UTP--glucose-1-phosphate uridylyltransferase	[EC:2.7.7.9]	Amino sugar and nucleotide sugar metabolism	Carbohydrate metabolism	Metabolism	PF00483	Nucleotidyl transferase	-	2.7.7.-	-	1
NZ_CP052867	chromosome	chromosome:1	HJC54_RS14320	353448	354330	-	N	CDS	UTP--glucose-1-phosphate uridylyltransferase GalU	5	P:GO:0006011; P:GO:0009058; F:GO:0003983; F:GO:0016740; F:GO:0016779	P:UDP-glucose metabolic process; P:biosynthetic process; F:UTP:glucose-1-phosphate uridylyltransferase activity; F:transferase activity; F:nucleotidyltransferase activity	COG1210@1|root,COG1210@2|Bacteria,1MV5F@1224|Proteobacteria,2VH00@28216|Betaproteobacteria,1K05P@119060|Burkholderiaceae	M	UTP-glucose-1-phosphate uridylyltransferase	K00963	UGP2, galU, galF; UTP--glucose-1-phosphate uridylyltransferase	[EC:2.7.7.9]	O-Antigen nucleotide sugar biosynthesis	Glycan biosynthesis and metabolism	Metabolism	PF00483	Nucleotidyl transferase	-	2.7.7.-	-	1
NZ_CP052867	chromosome	chromosome:1	HJC54_RS14325	354418	357289	-	N	CDS	valine--tRNA ligase	12	P:GO:0006412; P:GO:0006418; P:GO:0006438; P:GO:0044267; P:GO:0106074; F:GO:0000166; F:GO:0002161; F:GO:0004812; F:GO:0004832; F:GO:0005524; F:GO:0016874; C:GO:0005737	P:translation; P:tRNA aminoacylation for protein translation; P:valyl-tRNA aminoacylation; P:cellular protein metabolic process; P:aminoacyl-tRNA metabolism involved in translational fidelity; F:nucleotide binding; F:aminoacyl-tRNA editing activity; F:aminoacyl-tRNA ligase activity; F:valine-tRNA ligase activity; F:ATP binding; F:ligase activity; C:cytoplasm	COG0525@1|root,COG0525@2|Bacteria,1MV7B@1224|Proteobacteria,2VH5Z@28216|Betaproteobacteria,1K21B@119060|Burkholderiaceae	J	amino acids such as threonine, to avoid such errors, it has a posttransfer editing activity that hydrolyzes mischarged Thr-tRNA(Val) in a tRNA-dependent manner	K01873	VARS, valS; valyl-tRNA synthetase	[EC:6.1.1.9]	Aminoacyl-tRNA biosynthesis	Translation	Genetic Information Processing	PF10458	Valyl tRNA synthetase tRNA binding arm	-	6.1.1.-	GH5_11	2
NZ_CP052867	chromosome	chromosome:1	HJC54_RS14325	354418	357289	-	N	CDS	valine--tRNA ligase	12	P:GO:0006412; P:GO:0006418; P:GO:0006438; P:GO:0044267; P:GO:0106074; F:GO:0000166; F:GO:0002161; F:GO:0004812; F:GO:0004832; F:GO:0005524; F:GO:0016874; C:GO:0005737	P:translation; P:tRNA aminoacylation for protein translation; P:valyl-tRNA aminoacylation; P:cellular protein metabolic process; P:aminoacyl-tRNA metabolism involved in translational fidelity; F:nucleotide binding; F:aminoacyl-tRNA editing activity; F:aminoacyl-tRNA ligase activity; F:valine-tRNA ligase activity; F:ATP binding; F:ligase activity; C:cytoplasm	COG0525@1|root,COG0525@2|Bacteria,1MV7B@1224|Proteobacteria,2VH5Z@28216|Betaproteobacteria,1K21B@119060|Burkholderiaceae	J	amino acids such as threonine, to avoid such errors, it has a posttransfer editing activity that hydrolyzes mischarged Thr-tRNA(Val) in a tRNA-dependent manner	K01873	VARS, valS; valyl-tRNA synthetase	[EC:6.1.1.9]	Aminoacyl-tRNA biosynthesis	Translation	Genetic Information Processing	PF00133	tRNA synthetases class I (I, L, M and V)	-	6.1.1.-	GH5_11	2
NZ_CP052867	chromosome	chromosome:1	HJC54_RS14325	354418	357289	-	N	CDS	valine--tRNA ligase	12	P:GO:0006412; P:GO:0006418; P:GO:0006438; P:GO:0044267; P:GO:0106074; F:GO:0000166; F:GO:0002161; F:GO:0004812; F:GO:0004832; F:GO:0005524; F:GO:0016874; C:GO:0005737	P:translation; P:tRNA aminoacylation for protein translation; P:valyl-tRNA aminoacylation; P:cellular protein metabolic process; P:aminoacyl-tRNA metabolism involved in translational fidelity; F:nucleotide binding; F:aminoacyl-tRNA editing activity; F:aminoacyl-tRNA ligase activity; F:valine-tRNA ligase activity; F:ATP binding; F:ligase activity; C:cytoplasm	COG0525@1|root,COG0525@2|Bacteria,1MV7B@1224|Proteobacteria,2VH5Z@28216|Betaproteobacteria,1K21B@119060|Burkholderiaceae	J	amino acids such as threonine, to avoid such errors, it has a posttransfer editing activity that hydrolyzes mischarged Thr-tRNA(Val) in a tRNA-dependent manner	K01873	VARS, valS; valyl-tRNA synthetase	[EC:6.1.1.9]	Aminoacyl-tRNA biosynthesis	Translation	Genetic Information Processing	PF08264	Anticodon-binding domain of tRNA ligase	-	6.1.1.-	GH5_11	2
NZ_CP052867	chromosome	chromosome:1	HJC54_RS14330	357583	359953	+	N	CDS	UvrD-helicase domain-containing protein	8	P:GO:0032508; F:GO:0000166; F:GO:0003677; F:GO:0003678; F:GO:0004386; F:GO:0005524; F:GO:0016787; F:GO:0016887	P:DNA duplex unwinding; F:nucleotide binding; F:DNA binding; F:DNA helicase activity; F:helicase activity; F:ATP binding; F:hydrolase activity; F:ATP hydrolysis activity	COG0210@1|root,COG0210@2|Bacteria,1MU0G@1224|Proteobacteria,2VH4I@28216|Betaproteobacteria,1K29A@119060|Burkholderiaceae	L	helicase	K03657	uvrD, pcrA; ATP-dependent DNA helicase UvrD/PcrA	[EC:5.6.2.4]	Nucleotide excision repair	Replication and repair	Genetic Information Processing	PF00580	UvrD/REP helicase N-terminal domain	-	3.6.4.-	-	1
NZ_CP052867	chromosome	chromosome:1	HJC54_RS14330	357583	359953	+	N	CDS	UvrD-helicase domain-containing protein	8	P:GO:0032508; F:GO:0000166; F:GO:0003677; F:GO:0003678; F:GO:0004386; F:GO:0005524; F:GO:0016787; F:GO:0016887	P:DNA duplex unwinding; F:nucleotide binding; F:DNA binding; F:DNA helicase activity; F:helicase activity; F:ATP binding; F:hydrolase activity; F:ATP hydrolysis activity	COG0210@1|root,COG0210@2|Bacteria,1MU0G@1224|Proteobacteria,2VH4I@28216|Betaproteobacteria,1K29A@119060|Burkholderiaceae	L	helicase	K03657	uvrD, pcrA; ATP-dependent DNA helicase UvrD/PcrA	[EC:5.6.2.4]	Nucleotide excision repair	Replication and repair	Genetic Information Processing	PF13361	UvrD-like helicase C-terminal domain	-	3.6.4.-	-	1
NZ_CP052867	chromosome	chromosome:1	HJC54_RS14330	357583	359953	+	N	CDS	UvrD-helicase domain-containing protein	8	P:GO:0032508; F:GO:0000166; F:GO:0003677; F:GO:0003678; F:GO:0004386; F:GO:0005524; F:GO:0016787; F:GO:0016887	P:DNA duplex unwinding; F:nucleotide binding; F:DNA binding; F:DNA helicase activity; F:helicase activity; F:ATP binding; F:hydrolase activity; F:ATP hydrolysis activity	COG0210@1|root,COG0210@2|Bacteria,1MU0G@1224|Proteobacteria,2VH4I@28216|Betaproteobacteria,1K29A@119060|Burkholderiaceae	L	helicase	K03657	uvrD, pcrA; ATP-dependent DNA helicase UvrD/PcrA	[EC:5.6.2.4]	Mismatch repair	Replication and repair	Genetic Information Processing	PF00580	UvrD/REP helicase N-terminal domain	-	3.6.4.-	-	1
NZ_CP052867	chromosome	chromosome:1	HJC54_RS14330	357583	359953	+	N	CDS	UvrD-helicase domain-containing protein	8	P:GO:0032508; F:GO:0000166; F:GO:0003677; F:GO:0003678; F:GO:0004386; F:GO:0005524; F:GO:0016787; F:GO:0016887	P:DNA duplex unwinding; F:nucleotide binding; F:DNA binding; F:DNA helicase activity; F:helicase activity; F:ATP binding; F:hydrolase activity; F:ATP hydrolysis activity	COG0210@1|root,COG0210@2|Bacteria,1MU0G@1224|Proteobacteria,2VH4I@28216|Betaproteobacteria,1K29A@119060|Burkholderiaceae	L	helicase	K03657	uvrD, pcrA; ATP-dependent DNA helicase UvrD/PcrA	[EC:5.6.2.4]	Mismatch repair	Replication and repair	Genetic Information Processing	PF13361	UvrD-like helicase C-terminal domain	-	3.6.4.-	-	1
NZ_CP052867	chromosome	chromosome:1	HJC54_RS14335	359958	360765	+	N	CDS	5'-methylthioadenosine/adenosylhomocysteine nucleosidase	9	P:GO:0008652; P:GO:0009086; P:GO:0009116; P:GO:0009164; P:GO:0019509; F:GO:0003824; F:GO:0008782; F:GO:0008930; F:GO:0016787	P:cellular amino acid biosynthetic process; P:methionine biosynthetic process; P:nucleoside metabolic process; P:nucleoside catabolic process; P:L-methionine salvage from methylthioadenosine; F:catalytic activity; F:adenosylhomocysteine nucleosidase activity; F:methylthioadenosine nucleosidase activity; F:hydrolase activity	COG0775@1|root,COG0775@2|Bacteria,1MY5S@1224|Proteobacteria,2VQBX@28216|Betaproteobacteria,1K0VJ@119060|Burkholderiaceae	E	Catalyzes the irreversible cleavage of the glycosidic bond in both 5'-methylthioadenosine (MTA) and S- adenosylhomocysteine (SAH AdoHcy) to adenine and the corresponding thioribose, 5'-methylthioribose and S-ribosylhomocysteine, respectively	K01243	mtnN, mtn, pfs; adenosylhomocysteine nucleosidase	[EC:3.2.2.9]	Cysteine and methionine metabolism	Amino acid metabolism	Metabolism	PF01048	Phosphorylase superfamily
NZ_CP052867	chromosome	chromosome:1	HJC54_RS14345	362475	364155	+	N	CDS	MCP four helix bundle domain-containing protein	7	P:GO:0006935; P:GO:0007165; P:GO:0016310; F:GO:0004888; F:GO:0016301; C:GO:0016020; C:GO:0016021	P:chemotaxis; P:signal transduction; P:phosphorylation; F:transmembrane signaling receptor activity; F:kinase activity; C:membrane; C:integral component of membrane	COG0840@1|root,COG0840@2|Bacteria,1MU9B@1224|Proteobacteria,2VGZ8@28216|Betaproteobacteria,1K1BU@119060|Burkholderiaceae	NT	Chemotaxis sensory transducer	K03406	mcp; methyl-accepting chemotaxis protein		Two-component system	Signal transduction	Environmental Information Processing	PF00015	Methyl-accepting chemotaxis protein (MCP) signalling domain
NZ_CP052867	chromosome	chromosome:1	HJC54_RS14345	362475	364155	+	N	CDS	MCP four helix bundle domain-containing protein	7	P:GO:0006935; P:GO:0007165; P:GO:0016310; F:GO:0004888; F:GO:0016301; C:GO:0016020; C:GO:0016021	P:chemotaxis; P:signal transduction; P:phosphorylation; F:transmembrane signaling receptor activity; F:kinase activity; C:membrane; C:integral component of membrane	COG0840@1|root,COG0840@2|Bacteria,1MU9B@1224|Proteobacteria,2VGZ8@28216|Betaproteobacteria,1K1BU@119060|Burkholderiaceae	NT	Chemotaxis sensory transducer	K03406	mcp; methyl-accepting chemotaxis protein		Two-component system	Signal transduction	Environmental Information Processing	PF12729	Four helix bundle sensory module for signal transduction
NZ_CP052867	chromosome	chromosome:1	HJC54_RS14345	362475	364155	+	N	CDS	MCP four helix bundle domain-containing protein	7	P:GO:0006935; P:GO:0007165; P:GO:0016310; F:GO:0004888; F:GO:0016301; C:GO:0016020; C:GO:0016021	P:chemotaxis; P:signal transduction; P:phosphorylation; F:transmembrane signaling receptor activity; F:kinase activity; C:membrane; C:integral component of membrane	COG0840@1|root,COG0840@2|Bacteria,1MU9B@1224|Proteobacteria,2VGZ8@28216|Betaproteobacteria,1K1BU@119060|Burkholderiaceae	NT	Chemotaxis sensory transducer	K03406	mcp; methyl-accepting chemotaxis protein		Bacterial chemotaxis	Cell motility	Cellular Processes	PF00015	Methyl-accepting chemotaxis protein (MCP) signalling domain
NZ_CP052867	chromosome	chromosome:1	HJC54_RS14345	362475	364155	+	N	CDS	MCP four helix bundle domain-containing protein	7	P:GO:0006935; P:GO:0007165; P:GO:0016310; F:GO:0004888; F:GO:0016301; C:GO:0016020; C:GO:0016021	P:chemotaxis; P:signal transduction; P:phosphorylation; F:transmembrane signaling receptor activity; F:kinase activity; C:membrane; C:integral component of membrane	COG0840@1|root,COG0840@2|Bacteria,1MU9B@1224|Proteobacteria,2VGZ8@28216|Betaproteobacteria,1K1BU@119060|Burkholderiaceae	NT	Chemotaxis sensory transducer	K03406	mcp; methyl-accepting chemotaxis protein		Bacterial chemotaxis	Cell motility	Cellular Processes	PF12729	Four helix bundle sensory module for signal transduction
NZ_CP052867	chromosome	chromosome:1	HJC54_RS14350	364321	365173	-	Y	CDS	HlyD family secretion protein
NZ_CP052867	chromosome	chromosome:1	HJC54_RS14355	365186	365390	-	N	CDS	DUF1656 domain-containing protein	2	C:GO:0016020; C:GO:0016021	C:membrane; C:integral component of membrane	2EGFD@1|root,33A7D@2|Bacteria,1NH03@1224|Proteobacteria,2VXXS@28216|Betaproteobacteria,1KAAN@119060|Burkholderiaceae	S	Protein of unknown function (DUF1656)	K21695	aaeX; protein AaeX		Structural proteins	Unclassified: signaling and cellular processes	Not Included in Pathway or Brite	PF07869	Protein of unknown function (DUF1656)
NZ_CP052867	chromosome	chromosome:1	HJC54_RS14360	365386	367549	-	N	CDS	FUSC family protein	5	P:GO:0055085; F:GO:0022857; C:GO:0005886; C:GO:0016020; C:GO:0016021	P:transmembrane transport; F:transmembrane transporter activity; C:plasma membrane; C:membrane; C:integral component of membrane	COG1289@1|root,COG1289@2|Bacteria,1MX9H@1224|Proteobacteria,2VK3A@28216|Betaproteobacteria,1K20M@119060|Burkholderiaceae	S	Fusaric acid resistance protein							PF04632	Fusaric acid resistance protein family
NZ_CP052867	chromosome	chromosome:1	HJC54_RS14365	367615	369142	-	N	CDS	efflux transporter outer membrane subunit	6	P:GO:0055085; F:GO:0015562; F:GO:0022857; C:GO:0005886; C:GO:0016020; C:GO:0016021	P:transmembrane transport; F:efflux transmembrane transporter activity; F:transmembrane transporter activity; C:plasma membrane; C:membrane; C:integral component of membrane	COG1538@1|root,COG1538@2|Bacteria,1MUZZ@1224|Proteobacteria,2VH6M@28216|Betaproteobacteria,1K16Z@119060|Burkholderiaceae	M	RND efflux system, outer membrane lipoprotein, NodT family							PF02321	Outer membrane efflux protein
NZ_CP052867	chromosome	chromosome:1	HJC54_RS14370	369300	370242	+	N	CDS	LysR family transcriptional regulator	2	P:GO:0006355; F:GO:0003700	P:regulation of transcription, DNA-templated; F:DNA-binding transcription factor activity	COG0583@1|root,COG0583@2|Bacteria,1PTTR@1224|Proteobacteria,2WEAM@28216|Betaproteobacteria,1K0NZ@119060|Burkholderiaceae	K	Transcriptional regulator							PF00126	Bacterial regulatory helix-turn-helix protein, lysR family
NZ_CP052867	chromosome	chromosome:1	HJC54_RS14370	369300	370242	+	N	CDS	LysR family transcriptional regulator	2	P:GO:0006355; F:GO:0003700	P:regulation of transcription, DNA-templated; F:DNA-binding transcription factor activity	COG0583@1|root,COG0583@2|Bacteria,1PTTR@1224|Proteobacteria,2WEAM@28216|Betaproteobacteria,1K0NZ@119060|Burkholderiaceae	K	Transcriptional regulator							PF03466	LysR substrate binding domain
NZ_CP052867	chromosome	chromosome:1	HJC54_RS14375	370370	370520	+	N	CDS	hypothetical protein
NZ_CP052867	chromosome	chromosome:1	HJC54_RS14380	371080	372004	+	N	CDS	dihydrodipicolinate synthase family protein	8	P:GO:0008652; P:GO:0009085; P:GO:0009089; P:GO:0019877; F:GO:0003824; F:GO:0008840; F:GO:0016829; C:GO:0005737	P:cellular amino acid biosynthetic process; P:lysine biosynthetic process; P:lysine biosynthetic process via diaminopimelate; P:diaminopimelate biosynthetic process; F:catalytic activity; F:4-hydroxy-tetrahydrodipicolinate synthase activity; F:lyase activity; C:cytoplasm	COG0329@1|root,COG0329@2|Bacteria,1MWAH@1224|Proteobacteria,2VH30@28216|Betaproteobacteria,1K1Z7@119060|Burkholderiaceae	EM	Dihydrodipicolinate synthetase family	K01714	dapA; 4-hydroxy-tetrahydrodipicolinate synthase	[EC:4.3.3.7]	Lysine biosynthesis	Amino acid metabolism	Metabolism	PF00701	Dihydrodipicolinate synthetase family
NZ_CP052867	chromosome	chromosome:1	HJC54_RS14380	371080	372004	+	N	CDS	dihydrodipicolinate synthase family protein	8	P:GO:0008652; P:GO:0009085; P:GO:0009089; P:GO:0019877; F:GO:0003824; F:GO:0008840; F:GO:0016829; C:GO:0005737	P:cellular amino acid biosynthetic process; P:lysine biosynthetic process; P:lysine biosynthetic process via diaminopimelate; P:diaminopimelate biosynthetic process; F:catalytic activity; F:4-hydroxy-tetrahydrodipicolinate synthase activity; F:lyase activity; C:cytoplasm	COG0329@1|root,COG0329@2|Bacteria,1MWAH@1224|Proteobacteria,2VH30@28216|Betaproteobacteria,1K1Z7@119060|Burkholderiaceae	EM	Dihydrodipicolinate synthetase family	K01714	dapA; 4-hydroxy-tetrahydrodipicolinate synthase	[EC:4.3.3.7]	Monobactam biosynthesis	Biosynthesis of other secondary metabolites	Metabolism	PF00701	Dihydrodipicolinate synthetase family
NZ_CP052867	chromosome	chromosome:1	HJC54_RS14390	373931	374927	-	Y	CDS	porin
NZ_CP052867	chromosome	chromosome:1	HJC54_RS14395	375382	376333	+	Y	CDS	LysR family transcriptional regulator
NZ_CP052867	chromosome	chromosome:1	HJC54_RS14400	376471	377272	-	N	CDS	metallophosphoesterase				COG1409@1|root,COG1409@2|Bacteria,1R4AZ@1224|Proteobacteria,2VP1R@28216|Betaproteobacteria,1K48K@119060|Burkholderiaceae	S	Metallophosphoesterase							PF00149	Calcineurin-like phosphoesterase
NZ_CP052867	chromosome	chromosome:1	HJC54_RS14405	377521	378943	-	N	CDS	FAD-binding oxidoreductase	4	F:GO:0003824; F:GO:0016491; F:GO:0050660; F:GO:0071949	F:catalytic activity; F:oxidoreductase activity; F:flavin adenine dinucleotide binding; F:FAD binding	COG0277@1|root,COG0277@2|Bacteria,1MU6Y@1224|Proteobacteria,2VH5A@28216|Betaproteobacteria,1K0RZ@119060|Burkholderiaceae	C	PFAM FAD linked oxidase domain protein							PF02913	FAD linked oxidases, C-terminal domain	-	1.1.99.-+1.1.2.-	-	1
NZ_CP052867	chromosome	chromosome:1	HJC54_RS14405	377521	378943	-	N	CDS	FAD-binding oxidoreductase	4	F:GO:0003824; F:GO:0016491; F:GO:0050660; F:GO:0071949	F:catalytic activity; F:oxidoreductase activity; F:flavin adenine dinucleotide binding; F:FAD binding	COG0277@1|root,COG0277@2|Bacteria,1MU6Y@1224|Proteobacteria,2VH5A@28216|Betaproteobacteria,1K0RZ@119060|Burkholderiaceae	C	PFAM FAD linked oxidase domain protein							PF01565	FAD binding domain	-	1.1.99.-+1.1.2.-	-	1
NZ_CP052867	chromosome	chromosome:1	HJC54_RS14410	378963	379470	-	N	CDS	DUF2069 domain-containing protein	2	C:GO:0016020; C:GO:0016021	C:membrane; C:integral component of membrane	COG3308@1|root,COG3308@2|Bacteria,1N1EF@1224|Proteobacteria,2VU3C@28216|Betaproteobacteria,1K8ZZ@119060|Burkholderiaceae	S	Predicted membrane protein (DUF2069)							PF09842	Predicted membrane protein (DUF2069)
NZ_CP052867	chromosome	chromosome:1	HJC54_RS14415	379466	380075	-	N	CDS	NAD(P)H:quinone oxidoreductase	3	F:GO:0003955; F:GO:0010181; F:GO:0016491	F:NAD(P)H dehydrogenase (quinone) activity; F:FMN binding; F:oxidoreductase activity	COG0655@1|root,COG0655@2|Bacteria,1MW7N@1224|Proteobacteria,2VJMC@28216|Betaproteobacteria,1K096@119060|Burkholderiaceae	S	Belongs to the WrbA family	K03809	wrbA; NAD(P)H dehydrogenase (quinone)	[EC:1.6.5.2]	Ubiquinone and other terpenoid-quinone biosynthesis	Metabolism of cofactors and vitamins	Metabolism	PF03358	NADPH-dependent FMN reductase	AA6(4-195)	-	-	1
NZ_CP052867	chromosome	chromosome:1	HJC54_RS14420	380158	381463	+	N	CDS	YihY family inner membrane protein	4	C:GO:0005886; C:GO:0005887; C:GO:0016020; C:GO:0016021	C:plasma membrane; C:integral component of plasma membrane; C:membrane; C:integral component of membrane	COG1295@1|root,COG1295@2|Bacteria,1QICW@1224|Proteobacteria,2VJNM@28216|Betaproteobacteria,1K0NM@119060|Burkholderiaceae	S	UPF0761 membrane protein	K07058	K07058; membrane protein		General function prediction only	Poorly characterized	Not Included in Pathway or Brite	PF03631	Virulence factor BrkB
NZ_CP052867	chromosome	chromosome:1	HJC54_RS14425	381564	381885	-	N	CDS	DUF962 domain-containing protein	2	C:GO:0016020; C:GO:0016021	C:membrane; C:integral component of membrane	COG4323@1|root,COG4323@2|Bacteria,1N16T@1224|Proteobacteria,2VTYA@28216|Betaproteobacteria,1K7Q6@119060|Burkholderiaceae	S	membrane							PF06127	Protein of unknown function (DUF962)
NZ_CP052867	chromosome	chromosome:1	HJC54_RS14430	382065	382536	+	N	CDS	CBS domain-containing protein				COG0517@1|root,COG0517@2|Bacteria,1N0H3@1224|Proteobacteria,2VQEB@28216|Betaproteobacteria,1K2SM@119060|Burkholderiaceae	C	CBS domain containing protein							PF00571	CBS domain
NZ_CP052867	chromosome	chromosome:1	HJC54_RS14435	382685	384620	+	N	CDS	MFS transporter	6	P:GO:0055085; F:GO:0016740; F:GO:0016746; F:GO:0022857; C:GO:0016020; C:GO:0016021	P:transmembrane transport; F:transferase activity; F:acyltransferase activity; F:transmembrane transporter activity; C:membrane; C:integral component of membrane	COG0204@1|root,COG0204@2|Bacteria,1MWDY@1224|Proteobacteria,2VJ4I@28216|Betaproteobacteria,1K1BW@119060|Burkholderiaceae	I	Glycerol acyltransferase							PF07690	Major Facilitator Superfamily
NZ_CP052867	chromosome	chromosome:1	HJC54_RS14435	382685	384620	+	N	CDS	MFS transporter	6	P:GO:0055085; F:GO:0016740; F:GO:0016746; F:GO:0022857; C:GO:0016020; C:GO:0016021	P:transmembrane transport; F:transferase activity; F:acyltransferase activity; F:transmembrane transporter activity; C:membrane; C:integral component of membrane	COG0204@1|root,COG0204@2|Bacteria,1MWDY@1224|Proteobacteria,2VJ4I@28216|Betaproteobacteria,1K1BW@119060|Burkholderiaceae	I	Glycerol acyltransferase							PF01553	Acyltransferase
NZ_CP052867	chromosome	chromosome:1	HJC54_RS14440	384746	385847	+	N	CDS	chorismate synthase	5	P:GO:0008652; P:GO:0009073; P:GO:0009423; F:GO:0004107; F:GO:0016829	P:cellular amino acid biosynthetic process; P:aromatic amino acid family biosynthetic process; P:chorismate biosynthetic process; F:chorismate synthase activity; F:lyase activity	COG0082@1|root,COG0082@2|Bacteria,1MU98@1224|Proteobacteria,2VJA4@28216|Betaproteobacteria,1JZQG@119060|Burkholderiaceae	E	Catalyzes the anti-1,4-elimination of the C-3 phosphate and the C-6 proR hydrogen from 5-enolpyruvylshikimate-3-phosphate (EPSP) to yield chorismate, which is the branch point compound that serves as the starting substrate for the three terminal pathways of aromatic amino acid biosynthesis. This reaction introduces a second double bond into the aromatic ring system	K01736	aroC; chorismate synthase	[EC:4.2.3.5]	Phenylalanine, tyrosine and tryptophan biosynthesis	Amino acid metabolism	Metabolism	PF01264	Chorismate synthase	-	4.2.3.-	-	1
NZ_CP052867	chromosome	chromosome:1	HJC54_RS14445	385965	387639	-	N	CDS	electron transfer flavoprotein-ubiquinone oxidoreductase	7	P:GO:0022900; P:GO:0022904; F:GO:0004174; F:GO:0016491; F:GO:0046872; F:GO:0051536; F:GO:0051539	P:electron transport chain; P:respiratory electron transport chain; F:electron-transferring-flavoprotein dehydrogenase activity; F:oxidoreductase activity; F:metal ion binding; F:iron-sulfur cluster binding; F:4 iron, 4 sulfur cluster binding	COG0644@1|root,COG2440@1|root,COG0644@2|Bacteria,COG2440@2|Bacteria,1MVU6@1224|Proteobacteria,2VH37@28216|Betaproteobacteria,1K2GN@119060|Burkholderiaceae	C	electron transfer flavoprotein-ubiquinone oxidoreductase	K00311	ETFDH; electron-transferring-flavoprotein dehydrogenase	[EC:1.5.5.1]	Enzymes with EC numbers	Unclassified: metabolism	Not Included in Pathway or Brite	PF13450	NAD(P)-binding Rossmann-like domain	-	1.5.5.-	GT87	2
NZ_CP052867	chromosome	chromosome:1	HJC54_RS14445	385965	387639	-	N	CDS	electron transfer flavoprotein-ubiquinone oxidoreductase	7	P:GO:0022900; P:GO:0022904; F:GO:0004174; F:GO:0016491; F:GO:0046872; F:GO:0051536; F:GO:0051539	P:electron transport chain; P:respiratory electron transport chain; F:electron-transferring-flavoprotein dehydrogenase activity; F:oxidoreductase activity; F:metal ion binding; F:iron-sulfur cluster binding; F:4 iron, 4 sulfur cluster binding	COG0644@1|root,COG2440@1|root,COG0644@2|Bacteria,COG2440@2|Bacteria,1MVU6@1224|Proteobacteria,2VH37@28216|Betaproteobacteria,1K2GN@119060|Burkholderiaceae	C	electron transfer flavoprotein-ubiquinone oxidoreductase	K00311	ETFDH; electron-transferring-flavoprotein dehydrogenase	[EC:1.5.5.1]	Enzymes with EC numbers	Unclassified: metabolism	Not Included in Pathway or Brite	PF05187	Electron transfer flavoprotein-ubiquinone oxidoreductase, 4Fe-4S	-	1.5.5.-	GT87	2
NZ_CP052867	chromosome	chromosome:1	HJC54_RS14450	387808	388585	+	N	CDS	SDR family oxidoreductase	2	F:GO:0008874; F:GO:0016491	F:gluconate 5-dehydrogenase activity; F:oxidoreductase activity	COG1028@1|root,COG1028@2|Bacteria,1MXWI@1224|Proteobacteria,2VJIU@28216|Betaproteobacteria,1K27Y@119060|Burkholderiaceae	IQ	short-chain dehydrogenase							PF13561	Enoyl-(Acyl carrier protein) reductase
NZ_CP052867	chromosome	chromosome:1	HJC54_RS14455	388613	389045	+	N	CDS	acyl-CoA thioesterase				COG0824@1|root,COG0824@2|Bacteria,1MZTU@1224|Proteobacteria,2WEAF@28216|Betaproteobacteria,1KHP7@119060|Burkholderiaceae	S	Acyl-ACP thioesterase	K07107	ybgC; acyl-CoA thioester hydrolase	[EC:3.1.2.-]	Enzymes with EC numbers	Unclassified: metabolism	Not Included in Pathway or Brite	PF13279	Thioesterase-like superfamily
NZ_CP052867	chromosome	chromosome:1	HJC54_RS14460	389103	389649	-	N	CDS	PAS and helix-turn-helix domain-containing protein	2	P:GO:0006355; F:GO:0003677	P:regulation of transcription, DNA-templated; F:DNA binding	COG2197@1|root,COG2197@2|Bacteria,1RAAY@1224|Proteobacteria,2VQ17@28216|Betaproteobacteria,1K1YQ@119060|Burkholderiaceae	K	PFAM regulatory protein LuxR							PF00196	Bacterial regulatory proteins, luxR family
NZ_CP052867	chromosome	chromosome:1	HJC54_RS14460	389103	389649	-	N	CDS	PAS and helix-turn-helix domain-containing protein	2	P:GO:0006355; F:GO:0003677	P:regulation of transcription, DNA-templated; F:DNA binding	COG2197@1|root,COG2197@2|Bacteria,1RAAY@1224|Proteobacteria,2VQ17@28216|Betaproteobacteria,1K1YQ@119060|Burkholderiaceae	K	PFAM regulatory protein LuxR							PF13426	PAS domain
NZ_CP052867	chromosome	chromosome:1	HJC54_RS14465	389887	390592	+	N	CDS	CoA transferase subunit A	3	F:GO:0008260; F:GO:0008410; F:GO:0016740	F:3-oxoacid CoA-transferase activity; F:CoA-transferase activity; F:transferase activity	COG1788@1|root,COG1788@2|Bacteria,1MVEI@1224|Proteobacteria,2VHFT@28216|Betaproteobacteria,1K11M@119060|Burkholderiaceae	I	3-oxoacid CoA-transferase, A subunit	K01028	scoA; 3-oxoacid CoA-transferase subunit A	[EC:2.8.3.5]	Butanoate metabolism	Carbohydrate metabolism	Metabolism	PF01144	Coenzyme A transferase	-	2.8.3.-	-	1
NZ_CP052867	chromosome	chromosome:1	HJC54_RS14465	389887	390592	+	N	CDS	CoA transferase subunit A	3	F:GO:0008260; F:GO:0008410; F:GO:0016740	F:3-oxoacid CoA-transferase activity; F:CoA-transferase activity; F:transferase activity	COG1788@1|root,COG1788@2|Bacteria,1MVEI@1224|Proteobacteria,2VHFT@28216|Betaproteobacteria,1K11M@119060|Burkholderiaceae	I	3-oxoacid CoA-transferase, A subunit	K01028	scoA; 3-oxoacid CoA-transferase subunit A	[EC:2.8.3.5]	Valine, leucine and isoleucine degradation	Amino acid metabolism	Metabolism	PF01144	Coenzyme A transferase	-	2.8.3.-	-	1
NZ_CP052867	chromosome	chromosome:1	HJC54_RS14470	390593	391235	+	N	CDS	CoA transferase subunit B	3	F:GO:0008260; F:GO:0008410; F:GO:0016740	F:3-oxoacid CoA-transferase activity; F:CoA-transferase activity; F:transferase activity	COG2057@1|root,COG2057@2|Bacteria,1RA4V@1224|Proteobacteria,2VII6@28216|Betaproteobacteria,1K4C3@119060|Burkholderiaceae	I	3-oxoacid CoA-transferase, B subunit	K01029	scoB; 3-oxoacid CoA-transferase subunit B	[EC:2.8.3.5]	Butanoate metabolism	Carbohydrate metabolism	Metabolism	PF01144	Coenzyme A transferase	-	2.8.3.-	-	1
NZ_CP052867	chromosome	chromosome:1	HJC54_RS14470	390593	391235	+	N	CDS	CoA transferase subunit B	3	F:GO:0008260; F:GO:0008410; F:GO:0016740	F:3-oxoacid CoA-transferase activity; F:CoA-transferase activity; F:transferase activity	COG2057@1|root,COG2057@2|Bacteria,1RA4V@1224|Proteobacteria,2VII6@28216|Betaproteobacteria,1K4C3@119060|Burkholderiaceae	I	3-oxoacid CoA-transferase, B subunit	K01029	scoB; 3-oxoacid CoA-transferase subunit B	[EC:2.8.3.5]	Valine, leucine and isoleucine degradation	Amino acid metabolism	Metabolism	PF01144	Coenzyme A transferase	-	2.8.3.-	-	1
NZ_CP052867	chromosome	chromosome:1	HJC54_RS14475	391380	392283	+	N	CDS	alpha/beta hydrolase	1	F:GO:0016787	F:hydrolase activity	COG0596@1|root,COG0596@2|Bacteria,1MVVX@1224|Proteobacteria,2VH81@28216|Betaproteobacteria,1K0W4@119060|Burkholderiaceae	S	Alpha beta hydrolase							PF12697	Alpha/beta hydrolase family
NZ_CP052867	chromosome	chromosome:1	HJC54_RS14480	392356	392710	+	N	CDS	RidA family protein				COG0251@1|root,COG0251@2|Bacteria,1MZ5K@1224|Proteobacteria,2VU19@28216|Betaproteobacteria,1K7TW@119060|Burkholderiaceae	J	PFAM Endoribonuclease L-PSP							PF01042	Endoribonuclease L-PSP
NZ_CP052867	chromosome	chromosome:1	HJC54_RS14485	392759	394988	+	N	CDS	bifunctional (p)ppGpp synthetase/guanosine-3',5'-bis(diphosphate) 3'-pyrophosphohydrolase	9	P:GO:0008152; P:GO:0015969; P:GO:0016310; F:GO:0003824; F:GO:0008728; F:GO:0016301; F:GO:0016740; F:GO:0016779; F:GO:0016787	P:metabolic process; P:guanosine tetraphosphate metabolic process; P:phosphorylation; F:catalytic activity; F:GTP diphosphokinase activity; F:kinase activity; F:transferase activity; F:nucleotidyltransferase activity; F:hydrolase activity	COG0317@1|root,COG0317@2|Bacteria,1MU44@1224|Proteobacteria,2VHSK@28216|Betaproteobacteria,1K1HX@119060|Burkholderiaceae	KT	In eubacteria ppGpp (guanosine 3'-diphosphate 5-' diphosphate) is a mediator of the stringent response that coordinates a variety of cellular activities in response to changes in nutritional abundance	K00951	relA; GTP pyrophosphokinase	[EC:2.7.6.5]	Purine metabolism	Nucleotide metabolism	Metabolism	PF13291	ACT domain	-	2.7.6.-	-	1
NZ_CP052867	chromosome	chromosome:1	HJC54_RS14485	392759	394988	+	N	CDS	bifunctional (p)ppGpp synthetase/guanosine-3',5'-bis(diphosphate) 3'-pyrophosphohydrolase	9	P:GO:0008152; P:GO:0015969; P:GO:0016310; F:GO:0003824; F:GO:0008728; F:GO:0016301; F:GO:0016740; F:GO:0016779; F:GO:0016787	P:metabolic process; P:guanosine tetraphosphate metabolic process; P:phosphorylation; F:catalytic activity; F:GTP diphosphokinase activity; F:kinase activity; F:transferase activity; F:nucleotidyltransferase activity; F:hydrolase activity	COG0317@1|root,COG0317@2|Bacteria,1MU44@1224|Proteobacteria,2VHSK@28216|Betaproteobacteria,1K1HX@119060|Burkholderiaceae	KT	In eubacteria ppGpp (guanosine 3'-diphosphate 5-' diphosphate) is a mediator of the stringent response that coordinates a variety of cellular activities in response to changes in nutritional abundance	K00951	relA; GTP pyrophosphokinase	[EC:2.7.6.5]	Purine metabolism	Nucleotide metabolism	Metabolism	PF04607	Region found in RelA / SpoT proteins	-	2.7.6.-	-	1
NZ_CP052867	chromosome	chromosome:1	HJC54_RS14485	392759	394988	+	N	CDS	bifunctional (p)ppGpp synthetase/guanosine-3',5'-bis(diphosphate) 3'-pyrophosphohydrolase	9	P:GO:0008152; P:GO:0015969; P:GO:0016310; F:GO:0003824; F:GO:0008728; F:GO:0016301; F:GO:0016740; F:GO:0016779; F:GO:0016787	P:metabolic process; P:guanosine tetraphosphate metabolic process; P:phosphorylation; F:catalytic activity; F:GTP diphosphokinase activity; F:kinase activity; F:transferase activity; F:nucleotidyltransferase activity; F:hydrolase activity	COG0317@1|root,COG0317@2|Bacteria,1MU44@1224|Proteobacteria,2VHSK@28216|Betaproteobacteria,1K1HX@119060|Burkholderiaceae	KT	In eubacteria ppGpp (guanosine 3'-diphosphate 5-' diphosphate) is a mediator of the stringent response that coordinates a variety of cellular activities in response to changes in nutritional abundance	K00951	relA; GTP pyrophosphokinase	[EC:2.7.6.5]	Purine metabolism	Nucleotide metabolism	Metabolism	PF02824	TGS domain	-	2.7.6.-	-	1
NZ_CP052867	chromosome	chromosome:1	HJC54_RS14485	392759	394988	+	N	CDS	bifunctional (p)ppGpp synthetase/guanosine-3',5'-bis(diphosphate) 3'-pyrophosphohydrolase	9	P:GO:0008152; P:GO:0015969; P:GO:0016310; F:GO:0003824; F:GO:0008728; F:GO:0016301; F:GO:0016740; F:GO:0016779; F:GO:0016787	P:metabolic process; P:guanosine tetraphosphate metabolic process; P:phosphorylation; F:catalytic activity; F:GTP diphosphokinase activity; F:kinase activity; F:transferase activity; F:nucleotidyltransferase activity; F:hydrolase activity	COG0317@1|root,COG0317@2|Bacteria,1MU44@1224|Proteobacteria,2VHSK@28216|Betaproteobacteria,1K1HX@119060|Burkholderiaceae	KT	In eubacteria ppGpp (guanosine 3'-diphosphate 5-' diphosphate) is a mediator of the stringent response that coordinates a variety of cellular activities in response to changes in nutritional abundance	K00951	relA; GTP pyrophosphokinase	[EC:2.7.6.5]	Purine metabolism	Nucleotide metabolism	Metabolism	PF13328	HD domain	-	2.7.6.-	-	1
NZ_CP052867	chromosome	chromosome:1	HJC54_RS14490	395077	395154	+	N	tRNA	tRNA-Val
NZ_CP052867	chromosome	chromosome:1	HJC54_RS14495	395398	397306	+	N	CDS	threonine--tRNA ligase	15	P:GO:0006412; P:GO:0006418; P:GO:0006435; P:GO:0006807; P:GO:0043039; P:GO:0071704; F:GO:0000049; F:GO:0000166; F:GO:0003723; F:GO:0004812; F:GO:0004829; F:GO:0005524; F:GO:0016874; F:GO:0046872; C:GO:0005737	P:translation; P:tRNA aminoacylation for protein translation; P:threonyl-tRNA aminoacylation; P:nitrogen compound metabolic process; P:tRNA aminoacylation; P:organic substance metabolic process; F:tRNA binding; F:nucleotide binding; F:RNA binding; F:aminoacyl-tRNA ligase activity; F:threonine-tRNA ligase activity; F:ATP binding; F:ligase activity; F:metal ion binding; C:cytoplasm	COG0441@1|root,COG0441@2|Bacteria,1MUP2@1224|Proteobacteria,2VHFD@28216|Betaproteobacteria,1JZSF@119060|Burkholderiaceae	J	Catalyzes the attachment of threonine to tRNA(Thr) in a two-step reaction L-threonine is first activated by ATP to form Thr-AMP and then transferred to the acceptor end of tRNA(Thr)	K01868	TARS, thrS; threonyl-tRNA synthetase	[EC:6.1.1.3]	Aminoacyl-tRNA biosynthesis	Translation	Genetic Information Processing	PF07973	Threonyl and Alanyl tRNA synthetase second additional domain	-	6.1.1.-	GH28	2
NZ_CP052867	chromosome	chromosome:1	HJC54_RS14495	395398	397306	+	N	CDS	threonine--tRNA ligase	15	P:GO:0006412; P:GO:0006418; P:GO:0006435; P:GO:0006807; P:GO:0043039; P:GO:0071704; F:GO:0000049; F:GO:0000166; F:GO:0003723; F:GO:0004812; F:GO:0004829; F:GO:0005524; F:GO:0016874; F:GO:0046872; C:GO:0005737	P:translation; P:tRNA aminoacylation for protein translation; P:threonyl-tRNA aminoacylation; P:nitrogen compound metabolic process; P:tRNA aminoacylation; P:organic substance metabolic process; F:tRNA binding; F:nucleotide binding; F:RNA binding; F:aminoacyl-tRNA ligase activity; F:threonine-tRNA ligase activity; F:ATP binding; F:ligase activity; F:metal ion binding; C:cytoplasm	COG0441@1|root,COG0441@2|Bacteria,1MUP2@1224|Proteobacteria,2VHFD@28216|Betaproteobacteria,1JZSF@119060|Burkholderiaceae	J	Catalyzes the attachment of threonine to tRNA(Thr) in a two-step reaction L-threonine is first activated by ATP to form Thr-AMP and then transferred to the acceptor end of tRNA(Thr)	K01868	TARS, thrS; threonyl-tRNA synthetase	[EC:6.1.1.3]	Aminoacyl-tRNA biosynthesis	Translation	Genetic Information Processing	PF00587	tRNA synthetase class II core domain (G, H, P, S and T)	-	6.1.1.-	GH28	2
NZ_CP052867	chromosome	chromosome:1	HJC54_RS14495	395398	397306	+	N	CDS	threonine--tRNA ligase	15	P:GO:0006412; P:GO:0006418; P:GO:0006435; P:GO:0006807; P:GO:0043039; P:GO:0071704; F:GO:0000049; F:GO:0000166; F:GO:0003723; F:GO:0004812; F:GO:0004829; F:GO:0005524; F:GO:0016874; F:GO:0046872; C:GO:0005737	P:translation; P:tRNA aminoacylation for protein translation; P:threonyl-tRNA aminoacylation; P:nitrogen compound metabolic process; P:tRNA aminoacylation; P:organic substance metabolic process; F:tRNA binding; F:nucleotide binding; F:RNA binding; F:aminoacyl-tRNA ligase activity; F:threonine-tRNA ligase activity; F:ATP binding; F:ligase activity; F:metal ion binding; C:cytoplasm	COG0441@1|root,COG0441@2|Bacteria,1MUP2@1224|Proteobacteria,2VHFD@28216|Betaproteobacteria,1JZSF@119060|Burkholderiaceae	J	Catalyzes the attachment of threonine to tRNA(Thr) in a two-step reaction L-threonine is first activated by ATP to form Thr-AMP and then transferred to the acceptor end of tRNA(Thr)	K01868	TARS, thrS; threonyl-tRNA synthetase	[EC:6.1.1.3]	Aminoacyl-tRNA biosynthesis	Translation	Genetic Information Processing	PF02824	TGS domain	-	6.1.1.-	GH28	2
NZ_CP052867	chromosome	chromosome:1	HJC54_RS14495	395398	397306	+	N	CDS	threonine--tRNA ligase	15	P:GO:0006412; P:GO:0006418; P:GO:0006435; P:GO:0006807; P:GO:0043039; P:GO:0071704; F:GO:0000049; F:GO:0000166; F:GO:0003723; F:GO:0004812; F:GO:0004829; F:GO:0005524; F:GO:0016874; F:GO:0046872; C:GO:0005737	P:translation; P:tRNA aminoacylation for protein translation; P:threonyl-tRNA aminoacylation; P:nitrogen compound metabolic process; P:tRNA aminoacylation; P:organic substance metabolic process; F:tRNA binding; F:nucleotide binding; F:RNA binding; F:aminoacyl-tRNA ligase activity; F:threonine-tRNA ligase activity; F:ATP binding; F:ligase activity; F:metal ion binding; C:cytoplasm	COG0441@1|root,COG0441@2|Bacteria,1MUP2@1224|Proteobacteria,2VHFD@28216|Betaproteobacteria,1JZSF@119060|Burkholderiaceae	J	Catalyzes the attachment of threonine to tRNA(Thr) in a two-step reaction L-threonine is first activated by ATP to form Thr-AMP and then transferred to the acceptor end of tRNA(Thr)	K01868	TARS, thrS; threonyl-tRNA synthetase	[EC:6.1.1.3]	Aminoacyl-tRNA biosynthesis	Translation	Genetic Information Processing	PF03129	Anticodon binding domain	-	6.1.1.-	GH28	2
NZ_CP052867	chromosome	chromosome:1	HJC54_RS14505	398068	398266	+	N	CDS	50S ribosomal protein L35				COG0291@1|root,COG0291@2|Bacteria,1N6V4@1224|Proteobacteria,2VVS9@28216|Betaproteobacteria,1K9H0@119060|Burkholderiaceae	J	Belongs to the bacterial ribosomal protein bL35 family	K02916	RP-L35, MRPL35, rpmI; large subunit ribosomal protein L35		Ribosome	Translation	Genetic Information Processing	PF01632	Ribosomal protein L35
NZ_CP052867	chromosome	chromosome:1	HJC54_RS14510	398294	398654	+	N	CDS	50S ribosomal protein L20				COG0292@1|root,COG0292@2|Bacteria,1RGU2@1224|Proteobacteria,2VRWF@28216|Betaproteobacteria,1K7MK@119060|Burkholderiaceae	J	Binds directly to 23S ribosomal RNA and is necessary for the in vitro assembly process of the 50S ribosomal subunit. It is not involved in the protein synthesizing functions of that subunit	K02887	RP-L20, MRPL20, rplT; large subunit ribosomal protein L20		Ribosome	Translation	Genetic Information Processing	PF00453	Ribosomal protein L20
NZ_CP052867	chromosome	chromosome:1	HJC54_RS14515	398802	399816	+	N	CDS	phenylalanine--tRNA ligase subunit alpha	14	P:GO:0006412; P:GO:0006432; P:GO:0006807; P:GO:0043039; P:GO:0071704; F:GO:0000049; F:GO:0000166; F:GO:0000287; F:GO:0004812; F:GO:0004826; F:GO:0005524; F:GO:0016874; F:GO:0046872; C:GO:0005737	P:translation; P:phenylalanyl-tRNA aminoacylation; P:nitrogen compound metabolic process; P:tRNA aminoacylation; P:organic substance metabolic process; F:tRNA binding; F:nucleotide binding; F:magnesium ion binding; F:aminoacyl-tRNA ligase activity; F:phenylalanine-tRNA ligase activity; F:ATP binding; F:ligase activity; F:metal ion binding; C:cytoplasm	COG0016@1|root,COG0016@2|Bacteria,1MVD7@1224|Proteobacteria,2VIM9@28216|Betaproteobacteria,1JZQM@119060|Burkholderiaceae	J	Belongs to the class-II aminoacyl-tRNA synthetase family. Phe-tRNA synthetase alpha subunit type 1 subfamily	K01889	FARSA, pheS; phenylalanyl-tRNA synthetase alpha chain	[EC:6.1.1.20]	Aminoacyl-tRNA biosynthesis	Translation	Genetic Information Processing	PF01409	tRNA synthetases class II core domain (F)	-	6.1.1.-	-	1
NZ_CP052867	chromosome	chromosome:1	HJC54_RS14515	398802	399816	+	N	CDS	phenylalanine--tRNA ligase subunit alpha	14	P:GO:0006412; P:GO:0006432; P:GO:0006807; P:GO:0043039; P:GO:0071704; F:GO:0000049; F:GO:0000166; F:GO:0000287; F:GO:0004812; F:GO:0004826; F:GO:0005524; F:GO:0016874; F:GO:0046872; C:GO:0005737	P:translation; P:phenylalanyl-tRNA aminoacylation; P:nitrogen compound metabolic process; P:tRNA aminoacylation; P:organic substance metabolic process; F:tRNA binding; F:nucleotide binding; F:magnesium ion binding; F:aminoacyl-tRNA ligase activity; F:phenylalanine-tRNA ligase activity; F:ATP binding; F:ligase activity; F:metal ion binding; C:cytoplasm	COG0016@1|root,COG0016@2|Bacteria,1MVD7@1224|Proteobacteria,2VIM9@28216|Betaproteobacteria,1JZQM@119060|Burkholderiaceae	J	Belongs to the class-II aminoacyl-tRNA synthetase family. Phe-tRNA synthetase alpha subunit type 1 subfamily	K01889	FARSA, pheS; phenylalanyl-tRNA synthetase alpha chain	[EC:6.1.1.20]	Aminoacyl-tRNA biosynthesis	Translation	Genetic Information Processing	PF02912	Aminoacyl tRNA synthetase class II, N-terminal domain	-	6.1.1.-	-	1
NZ_CP052867	chromosome	chromosome:1	HJC54_RS14520	399893	402323	+	N	CDS	phenylalanine--tRNA ligase subunit beta	12	P:GO:0006412; P:GO:0006432; F:GO:0000049; F:GO:0000166; F:GO:0000287; F:GO:0003723; F:GO:0004812; F:GO:0004826; F:GO:0005524; F:GO:0016874; F:GO:0046872; C:GO:0005737	P:translation; P:phenylalanyl-tRNA aminoacylation; F:tRNA binding; F:nucleotide binding; F:magnesium ion binding; F:RNA binding; F:aminoacyl-tRNA ligase activity; F:phenylalanine-tRNA ligase activity; F:ATP binding; F:ligase activity; F:metal ion binding; C:cytoplasm	COG0072@1|root,COG0073@1|root,COG0072@2|Bacteria,COG0073@2|Bacteria,1MWKS@1224|Proteobacteria,2VHR1@28216|Betaproteobacteria,1K1SA@119060|Burkholderiaceae	J	Belongs to the phenylalanyl-tRNA synthetase beta subunit family. Type 1 subfamily	K01890	FARSB, pheT; phenylalanyl-tRNA synthetase beta chain	[EC:6.1.1.20]	Aminoacyl-tRNA biosynthesis	Translation	Genetic Information Processing	PF17759	Phenylalanyl tRNA synthetase beta chain CLM domain	-	6.1.1.-	-	1
NZ_CP052867	chromosome	chromosome:1	HJC54_RS14520	399893	402323	+	N	CDS	phenylalanine--tRNA ligase subunit beta	12	P:GO:0006412; P:GO:0006432; F:GO:0000049; F:GO:0000166; F:GO:0000287; F:GO:0003723; F:GO:0004812; F:GO:0004826; F:GO:0005524; F:GO:0016874; F:GO:0046872; C:GO:0005737	P:translation; P:phenylalanyl-tRNA aminoacylation; F:tRNA binding; F:nucleotide binding; F:magnesium ion binding; F:RNA binding; F:aminoacyl-tRNA ligase activity; F:phenylalanine-tRNA ligase activity; F:ATP binding; F:ligase activity; F:metal ion binding; C:cytoplasm	COG0072@1|root,COG0073@1|root,COG0072@2|Bacteria,COG0073@2|Bacteria,1MWKS@1224|Proteobacteria,2VHR1@28216|Betaproteobacteria,1K1SA@119060|Burkholderiaceae	J	Belongs to the phenylalanyl-tRNA synthetase beta subunit family. Type 1 subfamily	K01890	FARSB, pheT; phenylalanyl-tRNA synthetase beta chain	[EC:6.1.1.20]	Aminoacyl-tRNA biosynthesis	Translation	Genetic Information Processing	PF01588	Putative tRNA binding domain	-	6.1.1.-	-	1
NZ_CP052867	chromosome	chromosome:1	HJC54_RS14520	399893	402323	+	N	CDS	phenylalanine--tRNA ligase subunit beta	12	P:GO:0006412; P:GO:0006432; F:GO:0000049; F:GO:0000166; F:GO:0000287; F:GO:0003723; F:GO:0004812; F:GO:0004826; F:GO:0005524; F:GO:0016874; F:GO:0046872; C:GO:0005737	P:translation; P:phenylalanyl-tRNA aminoacylation; F:tRNA binding; F:nucleotide binding; F:magnesium ion binding; F:RNA binding; F:aminoacyl-tRNA ligase activity; F:phenylalanine-tRNA ligase activity; F:ATP binding; F:ligase activity; F:metal ion binding; C:cytoplasm	COG0072@1|root,COG0073@1|root,COG0072@2|Bacteria,COG0073@2|Bacteria,1MWKS@1224|Proteobacteria,2VHR1@28216|Betaproteobacteria,1K1SA@119060|Burkholderiaceae	J	Belongs to the phenylalanyl-tRNA synthetase beta subunit family. Type 1 subfamily	K01890	FARSB, pheT; phenylalanyl-tRNA synthetase beta chain	[EC:6.1.1.20]	Aminoacyl-tRNA biosynthesis	Translation	Genetic Information Processing	PF03483	B3/4 domain	-	6.1.1.-	-	1
NZ_CP052867	chromosome	chromosome:1	HJC54_RS14520	399893	402323	+	N	CDS	phenylalanine--tRNA ligase subunit beta	12	P:GO:0006412; P:GO:0006432; F:GO:0000049; F:GO:0000166; F:GO:0000287; F:GO:0003723; F:GO:0004812; F:GO:0004826; F:GO:0005524; F:GO:0016874; F:GO:0046872; C:GO:0005737	P:translation; P:phenylalanyl-tRNA aminoacylation; F:tRNA binding; F:nucleotide binding; F:magnesium ion binding; F:RNA binding; F:aminoacyl-tRNA ligase activity; F:phenylalanine-tRNA ligase activity; F:ATP binding; F:ligase activity; F:metal ion binding; C:cytoplasm	COG0072@1|root,COG0073@1|root,COG0072@2|Bacteria,COG0073@2|Bacteria,1MWKS@1224|Proteobacteria,2VHR1@28216|Betaproteobacteria,1K1SA@119060|Burkholderiaceae	J	Belongs to the phenylalanyl-tRNA synthetase beta subunit family. Type 1 subfamily	K01890	FARSB, pheT; phenylalanyl-tRNA synthetase beta chain	[EC:6.1.1.20]	Aminoacyl-tRNA biosynthesis	Translation	Genetic Information Processing	PF03147	Ferredoxin-fold anticodon binding domain	-	6.1.1.-	-	1
NZ_CP052867	chromosome	chromosome:1	HJC54_RS14520	399893	402323	+	N	CDS	phenylalanine--tRNA ligase subunit beta	12	P:GO:0006412; P:GO:0006432; F:GO:0000049; F:GO:0000166; F:GO:0000287; F:GO:0003723; F:GO:0004812; F:GO:0004826; F:GO:0005524; F:GO:0016874; F:GO:0046872; C:GO:0005737	P:translation; P:phenylalanyl-tRNA aminoacylation; F:tRNA binding; F:nucleotide binding; F:magnesium ion binding; F:RNA binding; F:aminoacyl-tRNA ligase activity; F:phenylalanine-tRNA ligase activity; F:ATP binding; F:ligase activity; F:metal ion binding; C:cytoplasm	COG0072@1|root,COG0073@1|root,COG0072@2|Bacteria,COG0073@2|Bacteria,1MWKS@1224|Proteobacteria,2VHR1@28216|Betaproteobacteria,1K1SA@119060|Burkholderiaceae	J	Belongs to the phenylalanyl-tRNA synthetase beta subunit family. Type 1 subfamily	K01890	FARSB, pheT; phenylalanyl-tRNA synthetase beta chain	[EC:6.1.1.20]	Aminoacyl-tRNA biosynthesis	Translation	Genetic Information Processing	PF03484	tRNA synthetase B5 domain	-	6.1.1.-	-	1
NZ_CP052867	chromosome	chromosome:1	HJC54_RS14530	402858	403267	+	Y	CDS	MerR family transcriptional regulator
NZ_CP052867	chromosome	chromosome:1	HJC54_RS14535	403373	405467	-	N	CDS	hypothetical protein				2ACTP@1|root,312EI@2|Bacteria,1RFTU@1224|Proteobacteria,2W0F8@28216|Betaproteobacteria,1K22P@119060|Burkholderiaceae	-	-
NZ_CP052867	chromosome	chromosome:1	HJC54_RS14540	406014	406185	+	N	CDS	Flp family type IVb pilin	2	C:GO:0016020; C:GO:0016021	C:membrane; C:integral component of membrane				K02651	flp, pilA; pilus assembly protein Flp/PilA		Cell cycle - Caulobacter	Cell growth and death	Cellular Processes	PF04964	Flp/Fap pilin component
NZ_CP052867	chromosome	chromosome:1	HJC54_RS14545	406243	407686	-	N	CDS	PLP-dependent aminotransferase family protein	7	P:GO:0006355; P:GO:0009058; F:GO:0003700; F:GO:0003824; F:GO:0008483; F:GO:0016740; F:GO:0030170	P:regulation of transcription, DNA-templated; P:biosynthetic process; F:DNA-binding transcription factor activity; F:catalytic activity; F:transaminase activity; F:transferase activity; F:pyridoxal phosphate binding	COG1167@1|root,COG1167@2|Bacteria,1MV6F@1224|Proteobacteria,2VGZY@28216|Betaproteobacteria,1JZQP@119060|Burkholderiaceae	K	Regulatory protein GntR HTH							PF00155	Aminotransferase class I and II
NZ_CP052867	chromosome	chromosome:1	HJC54_RS14545	406243	407686	-	N	CDS	PLP-dependent aminotransferase family protein	7	P:GO:0006355; P:GO:0009058; F:GO:0003700; F:GO:0003824; F:GO:0008483; F:GO:0016740; F:GO:0030170	P:regulation of transcription, DNA-templated; P:biosynthetic process; F:DNA-binding transcription factor activity; F:catalytic activity; F:transaminase activity; F:transferase activity; F:pyridoxal phosphate binding	COG1167@1|root,COG1167@2|Bacteria,1MV6F@1224|Proteobacteria,2VGZY@28216|Betaproteobacteria,1JZQP@119060|Burkholderiaceae	K	Regulatory protein GntR HTH							PF00392	Bacterial regulatory proteins, gntR family
NZ_CP052867	chromosome	chromosome:1	HJC54_RS14550	408131	409496	+	N	CDS	lysine 2,3-aminomutase	4	F:GO:0003824; F:GO:0016853; F:GO:0050066; F:GO:0051536	F:catalytic activity; F:isomerase activity; F:lysine 2,3-aminomutase activity; F:iron-sulfur cluster binding	COG1509@1|root,COG1509@2|Bacteria,1MUPJ@1224|Proteobacteria,2VH4U@28216|Betaproteobacteria,1K640@119060|Burkholderiaceae	E	lysine 2,3-aminomutase
NZ_CP052867	chromosome	chromosome:1	HJC54_RS14555	409500	410571	+	Y	CDS	Ldh family oxidoreductase
NZ_CP052867	chromosome	chromosome:1	HJC54_RS14560	410570	411476	+	N	CDS	branched-chain amino acid aminotransferase	14	P:GO:0008652; P:GO:0009081; P:GO:0009082; P:GO:0009097; P:GO:0009098; P:GO:0009099; F:GO:0003824; F:GO:0004084; F:GO:0008483; F:GO:0016740; F:GO:0050048; F:GO:0052654; F:GO:0052655; F:GO:0052656	P:cellular amino acid biosynthetic process; P:branched-chain amino acid metabolic process; P:branched-chain amino acid biosynthetic process; P:isoleucine biosynthetic process; P:leucine biosynthetic process; P:valine biosynthetic process; F:catalytic activity; F:branched-chain-amino-acid transaminase activity; F:transaminase activity; F:transferase activity; F:L-leucine:2-oxoglutarate aminotransf…	COG0115@1|root,COG0115@2|Bacteria,1MVB0@1224|Proteobacteria,2VHR7@28216|Betaproteobacteria,1K137@119060|Burkholderiaceae	E	Amino-transferase class IV	K00826	E2.6.1.42, ilvE; branched-chain amino acid aminotransferase	[EC:2.6.1.42]	Cysteine and methionine metabolism	Amino acid metabolism	Metabolism	PF01063	Amino-transferase class IV
NZ_CP052867	chromosome	chromosome:1	HJC54_RS14560	410570	411476	+	N	CDS	branched-chain amino acid aminotransferase	14	P:GO:0008652; P:GO:0009081; P:GO:0009082; P:GO:0009097; P:GO:0009098; P:GO:0009099; F:GO:0003824; F:GO:0004084; F:GO:0008483; F:GO:0016740; F:GO:0050048; F:GO:0052654; F:GO:0052655; F:GO:0052656	P:cellular amino acid biosynthetic process; P:branched-chain amino acid metabolic process; P:branched-chain amino acid biosynthetic process; P:isoleucine biosynthetic process; P:leucine biosynthetic process; P:valine biosynthetic process; F:catalytic activity; F:branched-chain-amino-acid transaminase activity; F:transaminase activity; F:transferase activity; F:L-leucine:2-oxoglutarate aminotransf…	COG0115@1|root,COG0115@2|Bacteria,1MVB0@1224|Proteobacteria,2VHR7@28216|Betaproteobacteria,1K137@119060|Burkholderiaceae	E	Amino-transferase class IV	K00826	E2.6.1.42, ilvE; branched-chain amino acid aminotransferase	[EC:2.6.1.42]	Valine, leucine and isoleucine degradation	Amino acid metabolism	Metabolism	PF01063	Amino-transferase class IV
NZ_CP052867	chromosome	chromosome:1	HJC54_RS14560	410570	411476	+	N	CDS	branched-chain amino acid aminotransferase	14	P:GO:0008652; P:GO:0009081; P:GO:0009082; P:GO:0009097; P:GO:0009098; P:GO:0009099; F:GO:0003824; F:GO:0004084; F:GO:0008483; F:GO:0016740; F:GO:0050048; F:GO:0052654; F:GO:0052655; F:GO:0052656	P:cellular amino acid biosynthetic process; P:branched-chain amino acid metabolic process; P:branched-chain amino acid biosynthetic process; P:isoleucine biosynthetic process; P:leucine biosynthetic process; P:valine biosynthetic process; F:catalytic activity; F:branched-chain-amino-acid transaminase activity; F:transaminase activity; F:transferase activity; F:L-leucine:2-oxoglutarate aminotransf…	COG0115@1|root,COG0115@2|Bacteria,1MVB0@1224|Proteobacteria,2VHR7@28216|Betaproteobacteria,1K137@119060|Burkholderiaceae	E	Amino-transferase class IV	K00826	E2.6.1.42, ilvE; branched-chain amino acid aminotransferase	[EC:2.6.1.42]	Valine, leucine and isoleucine biosynthesis	Amino acid metabolism	Metabolism	PF01063	Amino-transferase class IV
NZ_CP052867	chromosome	chromosome:1	HJC54_RS14560	410570	411476	+	N	CDS	branched-chain amino acid aminotransferase	14	P:GO:0008652; P:GO:0009081; P:GO:0009082; P:GO:0009097; P:GO:0009098; P:GO:0009099; F:GO:0003824; F:GO:0004084; F:GO:0008483; F:GO:0016740; F:GO:0050048; F:GO:0052654; F:GO:0052655; F:GO:0052656	P:cellular amino acid biosynthetic process; P:branched-chain amino acid metabolic process; P:branched-chain amino acid biosynthetic process; P:isoleucine biosynthetic process; P:leucine biosynthetic process; P:valine biosynthetic process; F:catalytic activity; F:branched-chain-amino-acid transaminase activity; F:transaminase activity; F:transferase activity; F:L-leucine:2-oxoglutarate aminotransf…	COG0115@1|root,COG0115@2|Bacteria,1MVB0@1224|Proteobacteria,2VHR7@28216|Betaproteobacteria,1K137@119060|Burkholderiaceae	E	Amino-transferase class IV	K00826	E2.6.1.42, ilvE; branched-chain amino acid aminotransferase	[EC:2.6.1.42]	Pantothenate and CoA biosynthesis	Metabolism of cofactors and vitamins	Metabolism	PF01063	Amino-transferase class IV
NZ_CP052867	chromosome	chromosome:1	HJC54_RS14560	410570	411476	+	N	CDS	branched-chain amino acid aminotransferase	14	P:GO:0008652; P:GO:0009081; P:GO:0009082; P:GO:0009097; P:GO:0009098; P:GO:0009099; F:GO:0003824; F:GO:0004084; F:GO:0008483; F:GO:0016740; F:GO:0050048; F:GO:0052654; F:GO:0052655; F:GO:0052656	P:cellular amino acid biosynthetic process; P:branched-chain amino acid metabolic process; P:branched-chain amino acid biosynthetic process; P:isoleucine biosynthetic process; P:leucine biosynthetic process; P:valine biosynthetic process; F:catalytic activity; F:branched-chain-amino-acid transaminase activity; F:transaminase activity; F:transferase activity; F:L-leucine:2-oxoglutarate aminotransf…	COG0115@1|root,COG0115@2|Bacteria,1MVB0@1224|Proteobacteria,2VHR7@28216|Betaproteobacteria,1K137@119060|Burkholderiaceae	E	Amino-transferase class IV	K00826	E2.6.1.42, ilvE; branched-chain amino acid aminotransferase	[EC:2.6.1.42]	Glucosinolate biosynthesis	Biosynthesis of other secondary metabolites	Metabolism	PF01063	Amino-transferase class IV
NZ_CP052867	chromosome	chromosome:1	HJC54_RS14565	411468	412233	+	N	CDS	TauD/TfdA family dioxygenase	6	F:GO:0008336; F:GO:0008483; F:GO:0016491; F:GO:0016740; F:GO:0046872; F:GO:0051213	F:gamma-butyrobetaine dioxygenase activity; F:transaminase activity; F:oxidoreductase activity; F:transferase activity; F:metal ion binding; F:dioxygenase activity	COG2175@1|root,COG2175@2|Bacteria,1NAM5@1224|Proteobacteria,2WAA9@28216|Betaproteobacteria,1K2HV@119060|Burkholderiaceae	Q	Taurine catabolism dioxygenase TauD, TfdA family							PF02668	Taurine catabolism dioxygenase TauD, TfdA family
NZ_CP052867	chromosome	chromosome:1	HJC54_RS14570	412242	413178	+	N	CDS	diiron oxygenase	1	F:GO:0016491	F:oxidoreductase activity	28M6N@1|root,2ZC9H@2|Bacteria,1NTD6@1224|Proteobacteria,2WIHR@28216|Betaproteobacteria,1KGAD@119060|Burkholderiaceae	S	P-aminobenzoate N-oxygenase AurF							PF11583	P-aminobenzoate N-oxygenase AurF
NZ_CP052867	chromosome	chromosome:1	HJC54_RS14575	413234	414080	+	N	CDS	N-acyl homoserine lactonase family protein	1	F:GO:0016787	F:hydrolase activity	COG0491@1|root,COG0491@2|Bacteria,1MUT2@1224|Proteobacteria,2VJ0Y@28216|Betaproteobacteria,1K3NG@119060|Burkholderiaceae	S	Metallo-beta-lactamase superfamily							PF00753	Metallo-beta-lactamase superfamily
NZ_CP052867	chromosome	chromosome:1	HJC54_RS14580	414081	414621	+	N	CDS	cupin domain-containing protein	3	F:GO:0016491; F:GO:0047922; F:GO:0051213	F:oxidoreductase activity; F:gentisate 1,2-dioxygenase activity; F:dioxygenase activity	2BSXB@1|root,32N0Z@2|Bacteria,1NYGC@1224|Proteobacteria,2WIGD@28216|Betaproteobacteria,1K8B1@119060|Burkholderiaceae	S	Cupin domain							PF07883	Cupin domain
NZ_CP052867	chromosome	chromosome:1	HJC54_RS14585	414617	415874	+	N	CDS	MFS transporter	4	P:GO:0055085; F:GO:0022857; C:GO:0016020; C:GO:0016021	P:transmembrane transport; F:transmembrane transporter activity; C:membrane; C:integral component of membrane	COG2271@1|root,COG2271@2|Bacteria,1NBE0@1224|Proteobacteria,2VJ93@28216|Betaproteobacteria,1JZPV@119060|Burkholderiaceae	G	PFAM major facilitator superfamily MFS_1							PF07690	Major Facilitator Superfamily
NZ_CP052867	chromosome	chromosome:1	HJC54_RS14590	416023	416659	+	N	CDS	glutathione transferase	3	P:GO:0006749; F:GO:0004364; F:GO:0016740	P:glutathione metabolic process; F:glutathione transferase activity; F:transferase activity	COG0625@1|root,COG0625@2|Bacteria,1NX28@1224|Proteobacteria,2VQ5Y@28216|Betaproteobacteria,1K4UY@119060|Burkholderiaceae	O	Glutathione S-transferase	K00799	GST, gst; glutathione S-transferase	[EC:2.5.1.18]	Glutathione metabolism	Metabolism of other amino acids	Metabolism	PF13417	Glutathione S-transferase, N-terminal domain
NZ_CP052867	chromosome	chromosome:1	HJC54_RS14590	416023	416659	+	N	CDS	glutathione transferase	3	P:GO:0006749; F:GO:0004364; F:GO:0016740	P:glutathione metabolic process; F:glutathione transferase activity; F:transferase activity	COG0625@1|root,COG0625@2|Bacteria,1NX28@1224|Proteobacteria,2VQ5Y@28216|Betaproteobacteria,1K4UY@119060|Burkholderiaceae	O	Glutathione S-transferase	K00799	GST, gst; glutathione S-transferase	[EC:2.5.1.18]	Glutathione metabolism	Metabolism of other amino acids	Metabolism	PF14834	Glutathione S-transferase, C-terminal domain
NZ_CP052867	chromosome	chromosome:1	HJC54_RS14590	416023	416659	+	N	CDS	glutathione transferase	3	P:GO:0006749; F:GO:0004364; F:GO:0016740	P:glutathione metabolic process; F:glutathione transferase activity; F:transferase activity	COG0625@1|root,COG0625@2|Bacteria,1NX28@1224|Proteobacteria,2VQ5Y@28216|Betaproteobacteria,1K4UY@119060|Burkholderiaceae	O	Glutathione S-transferase	K00799	GST, gst; glutathione S-transferase	[EC:2.5.1.18]	Metabolism of xenobiotics by cytochrome P450	Xenobiotics biodegradation and metabolism	Metabolism	PF13417	Glutathione S-transferase, N-terminal domain
NZ_CP052867	chromosome	chromosome:1	HJC54_RS14590	416023	416659	+	N	CDS	glutathione transferase	3	P:GO:0006749; F:GO:0004364; F:GO:0016740	P:glutathione metabolic process; F:glutathione transferase activity; F:transferase activity	COG0625@1|root,COG0625@2|Bacteria,1NX28@1224|Proteobacteria,2VQ5Y@28216|Betaproteobacteria,1K4UY@119060|Burkholderiaceae	O	Glutathione S-transferase	K00799	GST, gst; glutathione S-transferase	[EC:2.5.1.18]	Metabolism of xenobiotics by cytochrome P450	Xenobiotics biodegradation and metabolism	Metabolism	PF14834	Glutathione S-transferase, C-terminal domain
NZ_CP052867	chromosome	chromosome:1	HJC54_RS14590	416023	416659	+	N	CDS	glutathione transferase	3	P:GO:0006749; F:GO:0004364; F:GO:0016740	P:glutathione metabolic process; F:glutathione transferase activity; F:transferase activity	COG0625@1|root,COG0625@2|Bacteria,1NX28@1224|Proteobacteria,2VQ5Y@28216|Betaproteobacteria,1K4UY@119060|Burkholderiaceae	O	Glutathione S-transferase	K00799	GST, gst; glutathione S-transferase	[EC:2.5.1.18]	Drug metabolism - cytochrome P450	Xenobiotics biodegradation and metabolism	Metabolism	PF13417	Glutathione S-transferase, N-terminal domain
NZ_CP052867	chromosome	chromosome:1	HJC54_RS14590	416023	416659	+	N	CDS	glutathione transferase	3	P:GO:0006749; F:GO:0004364; F:GO:0016740	P:glutathione metabolic process; F:glutathione transferase activity; F:transferase activity	COG0625@1|root,COG0625@2|Bacteria,1NX28@1224|Proteobacteria,2VQ5Y@28216|Betaproteobacteria,1K4UY@119060|Burkholderiaceae	O	Glutathione S-transferase	K00799	GST, gst; glutathione S-transferase	[EC:2.5.1.18]	Drug metabolism - cytochrome P450	Xenobiotics biodegradation and metabolism	Metabolism	PF14834	Glutathione S-transferase, C-terminal domain
NZ_CP052867	chromosome	chromosome:1	HJC54_RS14590	416023	416659	+	N	CDS	glutathione transferase	3	P:GO:0006749; F:GO:0004364; F:GO:0016740	P:glutathione metabolic process; F:glutathione transferase activity; F:transferase activity	COG0625@1|root,COG0625@2|Bacteria,1NX28@1224|Proteobacteria,2VQ5Y@28216|Betaproteobacteria,1K4UY@119060|Burkholderiaceae	O	Glutathione S-transferase	K00799	GST, gst; glutathione S-transferase	[EC:2.5.1.18]	Drug metabolism - other enzymes	Xenobiotics biodegradation and metabolism	Metabolism	PF13417	Glutathione S-transferase, N-terminal domain
NZ_CP052867	chromosome	chromosome:1	HJC54_RS14590	416023	416659	+	N	CDS	glutathione transferase	3	P:GO:0006749; F:GO:0004364; F:GO:0016740	P:glutathione metabolic process; F:glutathione transferase activity; F:transferase activity	COG0625@1|root,COG0625@2|Bacteria,1NX28@1224|Proteobacteria,2VQ5Y@28216|Betaproteobacteria,1K4UY@119060|Burkholderiaceae	O	Glutathione S-transferase	K00799	GST, gst; glutathione S-transferase	[EC:2.5.1.18]	Drug metabolism - other enzymes	Xenobiotics biodegradation and metabolism	Metabolism	PF14834	Glutathione S-transferase, C-terminal domain
NZ_CP052867	chromosome	chromosome:1	HJC54_RS14590	416023	416659	+	N	CDS	glutathione transferase	3	P:GO:0006749; F:GO:0004364; F:GO:0016740	P:glutathione metabolic process; F:glutathione transferase activity; F:transferase activity	COG0625@1|root,COG0625@2|Bacteria,1NX28@1224|Proteobacteria,2VQ5Y@28216|Betaproteobacteria,1K4UY@119060|Burkholderiaceae	O	Glutathione S-transferase	K00799	GST, gst; glutathione S-transferase	[EC:2.5.1.18]	Longevity regulating pathway - worm	Aging	Organismal Systems	PF13417	Glutathione S-transferase, N-terminal domain
NZ_CP052867	chromosome	chromosome:1	HJC54_RS14590	416023	416659	+	N	CDS	glutathione transferase	3	P:GO:0006749; F:GO:0004364; F:GO:0016740	P:glutathione metabolic process; F:glutathione transferase activity; F:transferase activity	COG0625@1|root,COG0625@2|Bacteria,1NX28@1224|Proteobacteria,2VQ5Y@28216|Betaproteobacteria,1K4UY@119060|Burkholderiaceae	O	Glutathione S-transferase	K00799	GST, gst; glutathione S-transferase	[EC:2.5.1.18]	Longevity regulating pathway - worm	Aging	Organismal Systems	PF14834	Glutathione S-transferase, C-terminal domain
NZ_CP052867	chromosome	chromosome:1	HJC54_RS14590	416023	416659	+	N	CDS	glutathione transferase	3	P:GO:0006749; F:GO:0004364; F:GO:0016740	P:glutathione metabolic process; F:glutathione transferase activity; F:transferase activity	COG0625@1|root,COG0625@2|Bacteria,1NX28@1224|Proteobacteria,2VQ5Y@28216|Betaproteobacteria,1K4UY@119060|Burkholderiaceae	O	Glutathione S-transferase	K00799	GST, gst; glutathione S-transferase	[EC:2.5.1.18]	Pathways in cancer	Cancer: overview	Human Diseases	PF13417	Glutathione S-transferase, N-terminal domain
NZ_CP052867	chromosome	chromosome:1	HJC54_RS14590	416023	416659	+	N	CDS	glutathione transferase	3	P:GO:0006749; F:GO:0004364; F:GO:0016740	P:glutathione metabolic process; F:glutathione transferase activity; F:transferase activity	COG0625@1|root,COG0625@2|Bacteria,1NX28@1224|Proteobacteria,2VQ5Y@28216|Betaproteobacteria,1K4UY@119060|Burkholderiaceae	O	Glutathione S-transferase	K00799	GST, gst; glutathione S-transferase	[EC:2.5.1.18]	Pathways in cancer	Cancer: overview	Human Diseases	PF14834	Glutathione S-transferase, C-terminal domain
NZ_CP052867	chromosome	chromosome:1	HJC54_RS14590	416023	416659	+	N	CDS	glutathione transferase	3	P:GO:0006749; F:GO:0004364; F:GO:0016740	P:glutathione metabolic process; F:glutathione transferase activity; F:transferase activity	COG0625@1|root,COG0625@2|Bacteria,1NX28@1224|Proteobacteria,2VQ5Y@28216|Betaproteobacteria,1K4UY@119060|Burkholderiaceae	O	Glutathione S-transferase	K00799	GST, gst; glutathione S-transferase	[EC:2.5.1.18]	Chemical carcinogenesis - DNA adducts	Cancer: overview	Human Diseases	PF13417	Glutathione S-transferase, N-terminal domain
NZ_CP052867	chromosome	chromosome:1	HJC54_RS14590	416023	416659	+	N	CDS	glutathione transferase	3	P:GO:0006749; F:GO:0004364; F:GO:0016740	P:glutathione metabolic process; F:glutathione transferase activity; F:transferase activity	COG0625@1|root,COG0625@2|Bacteria,1NX28@1224|Proteobacteria,2VQ5Y@28216|Betaproteobacteria,1K4UY@119060|Burkholderiaceae	O	Glutathione S-transferase	K00799	GST, gst; glutathione S-transferase	[EC:2.5.1.18]	Chemical carcinogenesis - DNA adducts	Cancer: overview	Human Diseases	PF14834	Glutathione S-transferase, C-terminal domain
NZ_CP052867	chromosome	chromosome:1	HJC54_RS14590	416023	416659	+	N	CDS	glutathione transferase	3	P:GO:0006749; F:GO:0004364; F:GO:0016740	P:glutathione metabolic process; F:glutathione transferase activity; F:transferase activity	COG0625@1|root,COG0625@2|Bacteria,1NX28@1224|Proteobacteria,2VQ5Y@28216|Betaproteobacteria,1K4UY@119060|Burkholderiaceae	O	Glutathione S-transferase	K00799	GST, gst; glutathione S-transferase	[EC:2.5.1.18]	Chemical carcinogenesis - receptor activation	Cancer: overview	Human Diseases	PF13417	Glutathione S-transferase, N-terminal domain
NZ_CP052867	chromosome	chromosome:1	HJC54_RS14590	416023	416659	+	N	CDS	glutathione transferase	3	P:GO:0006749; F:GO:0004364; F:GO:0016740	P:glutathione metabolic process; F:glutathione transferase activity; F:transferase activity	COG0625@1|root,COG0625@2|Bacteria,1NX28@1224|Proteobacteria,2VQ5Y@28216|Betaproteobacteria,1K4UY@119060|Burkholderiaceae	O	Glutathione S-transferase	K00799	GST, gst; glutathione S-transferase	[EC:2.5.1.18]	Chemical carcinogenesis - receptor activation	Cancer: overview	Human Diseases	PF14834	Glutathione S-transferase, C-terminal domain
NZ_CP052867	chromosome	chromosome:1	HJC54_RS14590	416023	416659	+	N	CDS	glutathione transferase	3	P:GO:0006749; F:GO:0004364; F:GO:0016740	P:glutathione metabolic process; F:glutathione transferase activity; F:transferase activity	COG0625@1|root,COG0625@2|Bacteria,1NX28@1224|Proteobacteria,2VQ5Y@28216|Betaproteobacteria,1K4UY@119060|Burkholderiaceae	O	Glutathione S-transferase	K00799	GST, gst; glutathione S-transferase	[EC:2.5.1.18]	Chemical carcinogenesis - reactive oxygen species	Cancer: overview	Human Diseases	PF13417	Glutathione S-transferase, N-terminal domain
NZ_CP052867	chromosome	chromosome:1	HJC54_RS14590	416023	416659	+	N	CDS	glutathione transferase	3	P:GO:0006749; F:GO:0004364; F:GO:0016740	P:glutathione metabolic process; F:glutathione transferase activity; F:transferase activity	COG0625@1|root,COG0625@2|Bacteria,1NX28@1224|Proteobacteria,2VQ5Y@28216|Betaproteobacteria,1K4UY@119060|Burkholderiaceae	O	Glutathione S-transferase	K00799	GST, gst; glutathione S-transferase	[EC:2.5.1.18]	Chemical carcinogenesis - reactive oxygen species	Cancer: overview	Human Diseases	PF14834	Glutathione S-transferase, C-terminal domain
NZ_CP052867	chromosome	chromosome:1	HJC54_RS14590	416023	416659	+	N	CDS	glutathione transferase	3	P:GO:0006749; F:GO:0004364; F:GO:0016740	P:glutathione metabolic process; F:glutathione transferase activity; F:transferase activity	COG0625@1|root,COG0625@2|Bacteria,1NX28@1224|Proteobacteria,2VQ5Y@28216|Betaproteobacteria,1K4UY@119060|Burkholderiaceae	O	Glutathione S-transferase	K00799	GST, gst; glutathione S-transferase	[EC:2.5.1.18]	Hepatocellular carcinoma	Cancer: specific types	Human Diseases	PF13417	Glutathione S-transferase, N-terminal domain
NZ_CP052867	chromosome	chromosome:1	HJC54_RS14590	416023	416659	+	N	CDS	glutathione transferase	3	P:GO:0006749; F:GO:0004364; F:GO:0016740	P:glutathione metabolic process; F:glutathione transferase activity; F:transferase activity	COG0625@1|root,COG0625@2|Bacteria,1NX28@1224|Proteobacteria,2VQ5Y@28216|Betaproteobacteria,1K4UY@119060|Burkholderiaceae	O	Glutathione S-transferase	K00799	GST, gst; glutathione S-transferase	[EC:2.5.1.18]	Hepatocellular carcinoma	Cancer: specific types	Human Diseases	PF14834	Glutathione S-transferase, C-terminal domain
NZ_CP052867	chromosome	chromosome:1	HJC54_RS14590	416023	416659	+	N	CDS	glutathione transferase	3	P:GO:0006749; F:GO:0004364; F:GO:0016740	P:glutathione metabolic process; F:glutathione transferase activity; F:transferase activity	COG0625@1|root,COG0625@2|Bacteria,1NX28@1224|Proteobacteria,2VQ5Y@28216|Betaproteobacteria,1K4UY@119060|Burkholderiaceae	O	Glutathione S-transferase	K00799	GST, gst; glutathione S-transferase	[EC:2.5.1.18]	Fluid shear stress and atherosclerosis	Cardiovascular disease	Human Diseases	PF13417	Glutathione S-transferase, N-terminal domain
NZ_CP052867	chromosome	chromosome:1	HJC54_RS14590	416023	416659	+	N	CDS	glutathione transferase	3	P:GO:0006749; F:GO:0004364; F:GO:0016740	P:glutathione metabolic process; F:glutathione transferase activity; F:transferase activity	COG0625@1|root,COG0625@2|Bacteria,1NX28@1224|Proteobacteria,2VQ5Y@28216|Betaproteobacteria,1K4UY@119060|Burkholderiaceae	O	Glutathione S-transferase	K00799	GST, gst; glutathione S-transferase	[EC:2.5.1.18]	Fluid shear stress and atherosclerosis	Cardiovascular disease	Human Diseases	PF14834	Glutathione S-transferase, C-terminal domain
NZ_CP052867	chromosome	chromosome:1	HJC54_RS14590	416023	416659	+	N	CDS	glutathione transferase	3	P:GO:0006749; F:GO:0004364; F:GO:0016740	P:glutathione metabolic process; F:glutathione transferase activity; F:transferase activity	COG0625@1|root,COG0625@2|Bacteria,1NX28@1224|Proteobacteria,2VQ5Y@28216|Betaproteobacteria,1K4UY@119060|Burkholderiaceae	O	Glutathione S-transferase	K00799	GST, gst; glutathione S-transferase	[EC:2.5.1.18]	Platinum drug resistance	Drug resistance: antineoplastic	Human Diseases	PF13417	Glutathione S-transferase, N-terminal domain
NZ_CP052867	chromosome	chromosome:1	HJC54_RS14590	416023	416659	+	N	CDS	glutathione transferase	3	P:GO:0006749; F:GO:0004364; F:GO:0016740	P:glutathione metabolic process; F:glutathione transferase activity; F:transferase activity	COG0625@1|root,COG0625@2|Bacteria,1NX28@1224|Proteobacteria,2VQ5Y@28216|Betaproteobacteria,1K4UY@119060|Burkholderiaceae	O	Glutathione S-transferase	K00799	GST, gst; glutathione S-transferase	[EC:2.5.1.18]	Platinum drug resistance	Drug resistance: antineoplastic	Human Diseases	PF14834	Glutathione S-transferase, C-terminal domain
NZ_CP052867	chromosome	chromosome:1	HJC54_RS14595	416680	417061	-	N	CDS	hypothetical protein				2A874@1|root,30X83@2|Bacteria,1PJ1S@1224|Proteobacteria,2W7ME@28216|Betaproteobacteria,1KETU@119060|Burkholderiaceae	-	-
NZ_CP052867	chromosome	chromosome:1	HJC54_RS14600	417057	417300	-	N	CDS	hypothetical protein
NZ_CP052867	chromosome	chromosome:1	HJC54_RS14605	417363	417440	+	N	tRNA	tRNA-Pro
NZ_CP052867	chromosome	chromosome:1	HJC54_RS14610	417682	417988	-	Y	CDS	transposase
NZ_CP052867	chromosome	chromosome:1	HJC54_RS14615	418231	418603	+	N	CDS	DUF1493 family protein				2EV5H@1|root,33NKA@2|Bacteria,1QA2Q@1224|Proteobacteria,2WD3X@28216|Betaproteobacteria,1K9A2@119060|Burkholderiaceae	S	Protein of unknown function (DUF1493)							PF07377	Protein of unknown function (DUF1493)
NZ_CP052867	chromosome	chromosome:1	HJC54_RS14620	418689	419765	-	Y	CDS	IS3 family transposase
NZ_CP052867	chromosome	chromosome:1	HJC54_RS14630	421341	421527	+	N	CDS	hypothetical protein
NZ_CP052867	chromosome	chromosome:1	HJC54_RS14635	421693	421984	+	N	CDS	antibiotic biosynthesis monooxygenase	1	F:GO:0004497	F:monooxygenase activity	COG1359@1|root,COG1359@2|Bacteria,1NGPW@1224|Proteobacteria,2VYVK@28216|Betaproteobacteria,1KI8E@119060|Burkholderiaceae	S	Antibiotic biosynthesis monooxygenase							PF03992	Antibiotic biosynthesis monooxygenase
NZ_CP052867	chromosome	chromosome:1	HJC54_RS14640	422040	422298	-	N	CDS	hypothetical protein				2FG3E@1|root,34800@2|Bacteria,1P263@1224|Proteobacteria,2W4GF@28216|Betaproteobacteria,1K8CE@119060|Burkholderiaceae	-	-
NZ_CP052867	chromosome	chromosome:1	HJC54_RS14645	422454	422718	-	N	CDS	hypothetical protein				2ANDC@1|root,31DBZ@2|Bacteria,1QAHH@1224|Proteobacteria,2WDE7@28216|Betaproteobacteria,1KA4F@119060|Burkholderiaceae	-	-
NZ_CP052867	chromosome	chromosome:1	HJC54_RS14650	422971	423688	-	N	CDS	YdcF family protein				COG1434@1|root,COG1434@2|Bacteria,1MWK6@1224|Proteobacteria,2VK0E@28216|Betaproteobacteria,1K5IN@119060|Burkholderiaceae	S	DUF218 domain							PF02698	DUF218 domain
NZ_CP052867	chromosome	chromosome:1	HJC54_RS14655	423876	424194	+	N	CDS	hypothetical protein				2A192@1|root,30PFG@2|Bacteria,1QDF6@1224|Proteobacteria,2W897@28216|Betaproteobacteria,1K8DQ@119060|Burkholderiaceae	-	-
NZ_CP052867	chromosome	chromosome:1	HJC54_RS14660	424358	424613	-	N	CDS	hypothetical protein
NZ_CP052867	chromosome	chromosome:1	HJC54_RS14665	424832	425234	-	N	CDS	transposase				COG3293@1|root,COG3293@2|Bacteria,1RAWR@1224|Proteobacteria,2W3R7@28216|Betaproteobacteria,1K6Y0@119060|Burkholderiaceae	L	transposase	K07492	K07492; putative transposase		Replication and repair	Unclassified: genetic information processing	Not Included in Pathway or Brite	PF13340	Putative transposase of IS4/5 family (DUF4096)
NZ_CP052867	chromosome	chromosome:1	HJC54_RS14670	425629	426532	+	N	CDS	LysR family transcriptional regulator	2	P:GO:0006355; F:GO:0003700	P:regulation of transcription, DNA-templated; F:DNA-binding transcription factor activity	COG0583@1|root,COG0583@2|Bacteria,1MUWX@1224|Proteobacteria,2VKVG@28216|Betaproteobacteria,1K2XM@119060|Burkholderiaceae	K	Transcriptional regulator							PF00126	Bacterial regulatory helix-turn-helix protein, lysR family
NZ_CP052867	chromosome	chromosome:1	HJC54_RS14670	425629	426532	+	N	CDS	LysR family transcriptional regulator	2	P:GO:0006355; F:GO:0003700	P:regulation of transcription, DNA-templated; F:DNA-binding transcription factor activity	COG0583@1|root,COG0583@2|Bacteria,1MUWX@1224|Proteobacteria,2VKVG@28216|Betaproteobacteria,1K2XM@119060|Burkholderiaceae	K	Transcriptional regulator							PF03466	LysR substrate binding domain
NZ_CP052867	chromosome	chromosome:1	HJC54_RS14675	426643	427843	+	N	CDS	pyridoxal phosphate-dependent aminotransferase	6	P:GO:0009058; P:GO:1901605; F:GO:0003824; F:GO:0008483; F:GO:0016740; F:GO:0030170	P:biosynthetic process; P:alpha-amino acid metabolic process; F:catalytic activity; F:transaminase activity; F:transferase activity; F:pyridoxal phosphate binding	COG0436@1|root,COG0436@2|Bacteria,1MX6F@1224|Proteobacteria,2VJI9@28216|Betaproteobacteria,1K4H6@119060|Burkholderiaceae	E	aminotransferase class I and II							PF00155	Aminotransferase class I and II
NZ_CP052867	chromosome	chromosome:1	HJC54_RS14725	440761	442261	-	N	CDS	efflux transporter outer membrane subunit	6	P:GO:0055085; F:GO:0015562; F:GO:0022857; C:GO:0005886; C:GO:0016020; C:GO:0016021	P:transmembrane transport; F:efflux transmembrane transporter activity; F:transmembrane transporter activity; C:plasma membrane; C:membrane; C:integral component of membrane	COG1538@1|root,COG1538@2|Bacteria,1MUZZ@1224|Proteobacteria,2VH6M@28216|Betaproteobacteria,1K1IN@119060|Burkholderiaceae	MU	TIGRFAM RND efflux system, outer membrane lipoprotein, NodT family							PF02321	Outer membrane efflux protein
NZ_CP052867	chromosome	chromosome:1	HJC54_RS14730	442343	442853	-	N	CDS	MarR family transcriptional regulator	2	P:GO:0006355; F:GO:0003700	P:regulation of transcription, DNA-templated; F:DNA-binding transcription factor activity	COG1846@1|root,COG1846@2|Bacteria,1N7BV@1224|Proteobacteria,2VU53@28216|Betaproteobacteria,1K4UE@119060|Burkholderiaceae	K	PFAM regulatory protein, MarR							PF01047	MarR family
NZ_CP052867	chromosome	chromosome:1	HJC54_RS14735	443244	445065	+	N	CDS	translational GTPase TypA	17	P:GO:0000027; P:GO:0006412; P:GO:0006414; P:GO:0042254; P:GO:0045727; F:GO:0000049; F:GO:0000166; F:GO:0003723; F:GO:0003746; F:GO:0003924; F:GO:0005525; F:GO:0016787; F:GO:0019843; F:GO:0043022; C:GO:0005737; C:GO:0005886; C:GO:0016020	P:ribosomal large subunit assembly; P:translation; P:translational elongation; P:ribosome biogenesis; P:positive regulation of translation; F:tRNA binding; F:nucleotide binding; F:RNA binding; F:translation elongation factor activity; F:GTPase activity; F:GTP binding; F:hydrolase activity; F:rRNA binding; F:ribosome binding; C:cytoplasm; C:plasma membrane; C:membrane	COG1217@1|root,COG1217@2|Bacteria,1MV5Q@1224|Proteobacteria,2VH2W@28216|Betaproteobacteria,1JZU5@119060|Burkholderiaceae	T	GTP-binding protein	K06207	typA, bipA; GTP-binding protein		Signaling proteins	Unclassified: signaling and cellular processes	Not Included in Pathway or Brite	PF03144	Elongation factor Tu domain 2
NZ_CP052867	chromosome	chromosome:1	HJC54_RS14735	443244	445065	+	N	CDS	translational GTPase TypA	17	P:GO:0000027; P:GO:0006412; P:GO:0006414; P:GO:0042254; P:GO:0045727; F:GO:0000049; F:GO:0000166; F:GO:0003723; F:GO:0003746; F:GO:0003924; F:GO:0005525; F:GO:0016787; F:GO:0019843; F:GO:0043022; C:GO:0005737; C:GO:0005886; C:GO:0016020	P:ribosomal large subunit assembly; P:translation; P:translational elongation; P:ribosome biogenesis; P:positive regulation of translation; F:tRNA binding; F:nucleotide binding; F:RNA binding; F:translation elongation factor activity; F:GTPase activity; F:GTP binding; F:hydrolase activity; F:rRNA binding; F:ribosome binding; C:cytoplasm; C:plasma membrane; C:membrane	COG1217@1|root,COG1217@2|Bacteria,1MV5Q@1224|Proteobacteria,2VH2W@28216|Betaproteobacteria,1JZU5@119060|Burkholderiaceae	T	GTP-binding protein	K06207	typA, bipA; GTP-binding protein		Signaling proteins	Unclassified: signaling and cellular processes	Not Included in Pathway or Brite	PF00009	Elongation factor Tu GTP binding domain
NZ_CP052867	chromosome	chromosome:1	HJC54_RS14735	443244	445065	+	N	CDS	translational GTPase TypA	17	P:GO:0000027; P:GO:0006412; P:GO:0006414; P:GO:0042254; P:GO:0045727; F:GO:0000049; F:GO:0000166; F:GO:0003723; F:GO:0003746; F:GO:0003924; F:GO:0005525; F:GO:0016787; F:GO:0019843; F:GO:0043022; C:GO:0005737; C:GO:0005886; C:GO:0016020	P:ribosomal large subunit assembly; P:translation; P:translational elongation; P:ribosome biogenesis; P:positive regulation of translation; F:tRNA binding; F:nucleotide binding; F:RNA binding; F:translation elongation factor activity; F:GTPase activity; F:GTP binding; F:hydrolase activity; F:rRNA binding; F:ribosome binding; C:cytoplasm; C:plasma membrane; C:membrane	COG1217@1|root,COG1217@2|Bacteria,1MV5Q@1224|Proteobacteria,2VH2W@28216|Betaproteobacteria,1JZU5@119060|Burkholderiaceae	T	GTP-binding protein	K06207	typA, bipA; GTP-binding protein		Signaling proteins	Unclassified: signaling and cellular processes	Not Included in Pathway or Brite	PF00679	Elongation factor G C-terminus
NZ_CP052867	chromosome	chromosome:1	HJC54_RS14740	445082	445271	+	N	CDS	hypothetical protein
NZ_CP052867	chromosome	chromosome:1	HJC54_RS14745	445383	448251	+	N	CDS	2-oxoglutarate dehydrogenase E1 component	5	P:GO:0006099; F:GO:0004591; F:GO:0016491; F:GO:0016624; F:GO:0030976	P:tricarboxylic acid cycle; F:oxoglutarate dehydrogenase (succinyl-transferring) activity; F:oxidoreductase activity; F:oxidoreductase activity, acting on the aldehyde or oxo group of donors, disulfide as acceptor; F:thiamine pyrophosphate binding	COG0567@1|root,COG0567@2|Bacteria,1MVBF@1224|Proteobacteria,2VJ0G@28216|Betaproteobacteria,1K532@119060|Burkholderiaceae	C	Dehydrogenase E1 component	K00164	OGDH, sucA; 2-oxoglutarate dehydrogenase E1 component	[EC:1.2.4.2]	Citrate cycle (TCA cycle)	Carbohydrate metabolism	Metabolism	PF02779	Transketolase, pyrimidine binding domain	-	4.1.1.-+1.2.4.-+2.2.1.-+2.3.1.-	GT2	2
NZ_CP052867	chromosome	chromosome:1	HJC54_RS14745	445383	448251	+	N	CDS	2-oxoglutarate dehydrogenase E1 component	5	P:GO:0006099; F:GO:0004591; F:GO:0016491; F:GO:0016624; F:GO:0030976	P:tricarboxylic acid cycle; F:oxoglutarate dehydrogenase (succinyl-transferring) activity; F:oxidoreductase activity; F:oxidoreductase activity, acting on the aldehyde or oxo group of donors, disulfide as acceptor; F:thiamine pyrophosphate binding	COG0567@1|root,COG0567@2|Bacteria,1MVBF@1224|Proteobacteria,2VJ0G@28216|Betaproteobacteria,1K532@119060|Burkholderiaceae	C	Dehydrogenase E1 component	K00164	OGDH, sucA; 2-oxoglutarate dehydrogenase E1 component	[EC:1.2.4.2]	Citrate cycle (TCA cycle)	Carbohydrate metabolism	Metabolism	PF00676	Dehydrogenase E1 component	-	4.1.1.-+1.2.4.-+2.2.1.-+2.3.1.-	GT2	2
NZ_CP052867	chromosome	chromosome:1	HJC54_RS14745	445383	448251	+	N	CDS	2-oxoglutarate dehydrogenase E1 component	5	P:GO:0006099; F:GO:0004591; F:GO:0016491; F:GO:0016624; F:GO:0030976	P:tricarboxylic acid cycle; F:oxoglutarate dehydrogenase (succinyl-transferring) activity; F:oxidoreductase activity; F:oxidoreductase activity, acting on the aldehyde or oxo group of donors, disulfide as acceptor; F:thiamine pyrophosphate binding	COG0567@1|root,COG0567@2|Bacteria,1MVBF@1224|Proteobacteria,2VJ0G@28216|Betaproteobacteria,1K532@119060|Burkholderiaceae	C	Dehydrogenase E1 component	K00164	OGDH, sucA; 2-oxoglutarate dehydrogenase E1 component	[EC:1.2.4.2]	Citrate cycle (TCA cycle)	Carbohydrate metabolism	Metabolism	PF16870	2-oxoglutarate dehydrogenase C-terminal	-	4.1.1.-+1.2.4.-+2.2.1.-+2.3.1.-	GT2	2
NZ_CP052867	chromosome	chromosome:1	HJC54_RS14745	445383	448251	+	N	CDS	2-oxoglutarate dehydrogenase E1 component	5	P:GO:0006099; F:GO:0004591; F:GO:0016491; F:GO:0016624; F:GO:0030976	P:tricarboxylic acid cycle; F:oxoglutarate dehydrogenase (succinyl-transferring) activity; F:oxidoreductase activity; F:oxidoreductase activity, acting on the aldehyde or oxo group of donors, disulfide as acceptor; F:thiamine pyrophosphate binding	COG0567@1|root,COG0567@2|Bacteria,1MVBF@1224|Proteobacteria,2VJ0G@28216|Betaproteobacteria,1K532@119060|Burkholderiaceae	C	Dehydrogenase E1 component	K00164	OGDH, sucA; 2-oxoglutarate dehydrogenase E1 component	[EC:1.2.4.2]	Citrate cycle (TCA cycle)	Carbohydrate metabolism	Metabolism	PF16078	2-oxoglutarate dehydrogenase N-terminus	-	4.1.1.-+1.2.4.-+2.2.1.-+2.3.1.-	GT2	2
NZ_CP052867	chromosome	chromosome:1	HJC54_RS14750	448374	449646	+	N	CDS	2-oxoglutarate dehydrogenase complex dihydrolipoyllysine-residue succinyltransferase	7	P:GO:0006099; P:GO:0033512; F:GO:0004149; F:GO:0016740; F:GO:0016746; C:GO:0005737; C:GO:0045252	P:tricarboxylic acid cycle; P:L-lysine catabolic process to acetyl-CoA via saccharopine; F:dihydrolipoyllysine-residue succinyltransferase activity; F:transferase activity; F:acyltransferase activity; C:cytoplasm; C:oxoglutarate dehydrogenase complex	COG0508@1|root,COG0508@2|Bacteria,1MUJD@1224|Proteobacteria,2VIEM@28216|Betaproteobacteria,1K1V0@119060|Burkholderiaceae	C	The 2-oxoglutarate dehydrogenase complex catalyzes the overall conversion of 2-oxoglutarate to succinyl-CoA and CO(2)	K00658	DLST, sucB; 2-oxoglutarate dehydrogenase E2 component (dihydrolipoamide succinyltransferase)	[EC:2.3.1.61]	Citrate cycle (TCA cycle)	Carbohydrate metabolism	Metabolism	PF02817	e3 binding domain	-	2.3.1.-	-	1
NZ_CP052867	chromosome	chromosome:1	HJC54_RS14750	448374	449646	+	N	CDS	2-oxoglutarate dehydrogenase complex dihydrolipoyllysine-residue succinyltransferase	7	P:GO:0006099; P:GO:0033512; F:GO:0004149; F:GO:0016740; F:GO:0016746; C:GO:0005737; C:GO:0045252	P:tricarboxylic acid cycle; P:L-lysine catabolic process to acetyl-CoA via saccharopine; F:dihydrolipoyllysine-residue succinyltransferase activity; F:transferase activity; F:acyltransferase activity; C:cytoplasm; C:oxoglutarate dehydrogenase complex	COG0508@1|root,COG0508@2|Bacteria,1MUJD@1224|Proteobacteria,2VIEM@28216|Betaproteobacteria,1K1V0@119060|Burkholderiaceae	C	The 2-oxoglutarate dehydrogenase complex catalyzes the overall conversion of 2-oxoglutarate to succinyl-CoA and CO(2)	K00658	DLST, sucB; 2-oxoglutarate dehydrogenase E2 component (dihydrolipoamide succinyltransferase)	[EC:2.3.1.61]	Citrate cycle (TCA cycle)	Carbohydrate metabolism	Metabolism	PF00364	Biotin-requiring enzyme	-	2.3.1.-	-	1
NZ_CP052867	chromosome	chromosome:1	HJC54_RS14750	448374	449646	+	N	CDS	2-oxoglutarate dehydrogenase complex dihydrolipoyllysine-residue succinyltransferase	7	P:GO:0006099; P:GO:0033512; F:GO:0004149; F:GO:0016740; F:GO:0016746; C:GO:0005737; C:GO:0045252	P:tricarboxylic acid cycle; P:L-lysine catabolic process to acetyl-CoA via saccharopine; F:dihydrolipoyllysine-residue succinyltransferase activity; F:transferase activity; F:acyltransferase activity; C:cytoplasm; C:oxoglutarate dehydrogenase complex	COG0508@1|root,COG0508@2|Bacteria,1MUJD@1224|Proteobacteria,2VIEM@28216|Betaproteobacteria,1K1V0@119060|Burkholderiaceae	C	The 2-oxoglutarate dehydrogenase complex catalyzes the overall conversion of 2-oxoglutarate to succinyl-CoA and CO(2)	K00658	DLST, sucB; 2-oxoglutarate dehydrogenase E2 component (dihydrolipoamide succinyltransferase)	[EC:2.3.1.61]	Citrate cycle (TCA cycle)	Carbohydrate metabolism	Metabolism	PF00198	2-oxoacid dehydrogenases acyltransferase (catalytic domain)	-	2.3.1.-	-	1
NZ_CP052867	chromosome	chromosome:1	HJC54_RS14750	448374	449646	+	N	CDS	2-oxoglutarate dehydrogenase complex dihydrolipoyllysine-residue succinyltransferase	7	P:GO:0006099; P:GO:0033512; F:GO:0004149; F:GO:0016740; F:GO:0016746; C:GO:0005737; C:GO:0045252	P:tricarboxylic acid cycle; P:L-lysine catabolic process to acetyl-CoA via saccharopine; F:dihydrolipoyllysine-residue succinyltransferase activity; F:transferase activity; F:acyltransferase activity; C:cytoplasm; C:oxoglutarate dehydrogenase complex	COG0508@1|root,COG0508@2|Bacteria,1MUJD@1224|Proteobacteria,2VIEM@28216|Betaproteobacteria,1K1V0@119060|Burkholderiaceae	C	The 2-oxoglutarate dehydrogenase complex catalyzes the overall conversion of 2-oxoglutarate to succinyl-CoA and CO(2)	K00658	DLST, sucB; 2-oxoglutarate dehydrogenase E2 component (dihydrolipoamide succinyltransferase)	[EC:2.3.1.61]	Lysine degradation	Amino acid metabolism	Metabolism	PF02817	e3 binding domain	-	2.3.1.-	-	1
NZ_CP052867	chromosome	chromosome:1	HJC54_RS14750	448374	449646	+	N	CDS	2-oxoglutarate dehydrogenase complex dihydrolipoyllysine-residue succinyltransferase	7	P:GO:0006099; P:GO:0033512; F:GO:0004149; F:GO:0016740; F:GO:0016746; C:GO:0005737; C:GO:0045252	P:tricarboxylic acid cycle; P:L-lysine catabolic process to acetyl-CoA via saccharopine; F:dihydrolipoyllysine-residue succinyltransferase activity; F:transferase activity; F:acyltransferase activity; C:cytoplasm; C:oxoglutarate dehydrogenase complex	COG0508@1|root,COG0508@2|Bacteria,1MUJD@1224|Proteobacteria,2VIEM@28216|Betaproteobacteria,1K1V0@119060|Burkholderiaceae	C	The 2-oxoglutarate dehydrogenase complex catalyzes the overall conversion of 2-oxoglutarate to succinyl-CoA and CO(2)	K00658	DLST, sucB; 2-oxoglutarate dehydrogenase E2 component (dihydrolipoamide succinyltransferase)	[EC:2.3.1.61]	Lysine degradation	Amino acid metabolism	Metabolism	PF00364	Biotin-requiring enzyme	-	2.3.1.-	-	1
NZ_CP052867	chromosome	chromosome:1	HJC54_RS14750	448374	449646	+	N	CDS	2-oxoglutarate dehydrogenase complex dihydrolipoyllysine-residue succinyltransferase	7	P:GO:0006099; P:GO:0033512; F:GO:0004149; F:GO:0016740; F:GO:0016746; C:GO:0005737; C:GO:0045252	P:tricarboxylic acid cycle; P:L-lysine catabolic process to acetyl-CoA via saccharopine; F:dihydrolipoyllysine-residue succinyltransferase activity; F:transferase activity; F:acyltransferase activity; C:cytoplasm; C:oxoglutarate dehydrogenase complex	COG0508@1|root,COG0508@2|Bacteria,1MUJD@1224|Proteobacteria,2VIEM@28216|Betaproteobacteria,1K1V0@119060|Burkholderiaceae	C	The 2-oxoglutarate dehydrogenase complex catalyzes the overall conversion of 2-oxoglutarate to succinyl-CoA and CO(2)	K00658	DLST, sucB; 2-oxoglutarate dehydrogenase E2 component (dihydrolipoamide succinyltransferase)	[EC:2.3.1.61]	Lysine degradation	Amino acid metabolism	Metabolism	PF00198	2-oxoacid dehydrogenases acyltransferase (catalytic domain)	-	2.3.1.-	-	1
NZ_CP052867	chromosome	chromosome:1	HJC54_RS14750	448374	449646	+	N	CDS	2-oxoglutarate dehydrogenase complex dihydrolipoyllysine-residue succinyltransferase	7	P:GO:0006099; P:GO:0033512; F:GO:0004149; F:GO:0016740; F:GO:0016746; C:GO:0005737; C:GO:0045252	P:tricarboxylic acid cycle; P:L-lysine catabolic process to acetyl-CoA via saccharopine; F:dihydrolipoyllysine-residue succinyltransferase activity; F:transferase activity; F:acyltransferase activity; C:cytoplasm; C:oxoglutarate dehydrogenase complex	COG0508@1|root,COG0508@2|Bacteria,1MUJD@1224|Proteobacteria,2VIEM@28216|Betaproteobacteria,1K1V0@119060|Burkholderiaceae	C	The 2-oxoglutarate dehydrogenase complex catalyzes the overall conversion of 2-oxoglutarate to succinyl-CoA and CO(2)	K00658	DLST, sucB; 2-oxoglutarate dehydrogenase E2 component (dihydrolipoamide succinyltransferase)	[EC:2.3.1.61]	Tryptophan metabolism	Amino acid metabolism	Metabolism	PF02817	e3 binding domain	-	2.3.1.-	-	1
NZ_CP052867	chromosome	chromosome:1	HJC54_RS14750	448374	449646	+	N	CDS	2-oxoglutarate dehydrogenase complex dihydrolipoyllysine-residue succinyltransferase	7	P:GO:0006099; P:GO:0033512; F:GO:0004149; F:GO:0016740; F:GO:0016746; C:GO:0005737; C:GO:0045252	P:tricarboxylic acid cycle; P:L-lysine catabolic process to acetyl-CoA via saccharopine; F:dihydrolipoyllysine-residue succinyltransferase activity; F:transferase activity; F:acyltransferase activity; C:cytoplasm; C:oxoglutarate dehydrogenase complex	COG0508@1|root,COG0508@2|Bacteria,1MUJD@1224|Proteobacteria,2VIEM@28216|Betaproteobacteria,1K1V0@119060|Burkholderiaceae	C	The 2-oxoglutarate dehydrogenase complex catalyzes the overall conversion of 2-oxoglutarate to succinyl-CoA and CO(2)	K00658	DLST, sucB; 2-oxoglutarate dehydrogenase E2 component (dihydrolipoamide succinyltransferase)	[EC:2.3.1.61]	Tryptophan metabolism	Amino acid metabolism	Metabolism	PF00364	Biotin-requiring enzyme	-	2.3.1.-	-	1
NZ_CP052867	chromosome	chromosome:1	HJC54_RS14750	448374	449646	+	N	CDS	2-oxoglutarate dehydrogenase complex dihydrolipoyllysine-residue succinyltransferase	7	P:GO:0006099; P:GO:0033512; F:GO:0004149; F:GO:0016740; F:GO:0016746; C:GO:0005737; C:GO:0045252	P:tricarboxylic acid cycle; P:L-lysine catabolic process to acetyl-CoA via saccharopine; F:dihydrolipoyllysine-residue succinyltransferase activity; F:transferase activity; F:acyltransferase activity; C:cytoplasm; C:oxoglutarate dehydrogenase complex	COG0508@1|root,COG0508@2|Bacteria,1MUJD@1224|Proteobacteria,2VIEM@28216|Betaproteobacteria,1K1V0@119060|Burkholderiaceae	C	The 2-oxoglutarate dehydrogenase complex catalyzes the overall conversion of 2-oxoglutarate to succinyl-CoA and CO(2)	K00658	DLST, sucB; 2-oxoglutarate dehydrogenase E2 component (dihydrolipoamide succinyltransferase)	[EC:2.3.1.61]	Tryptophan metabolism	Amino acid metabolism	Metabolism	PF00198	2-oxoacid dehydrogenases acyltransferase (catalytic domain)	-	2.3.1.-	-	1
NZ_CP052867	chromosome	chromosome:1	HJC54_RS14755	449734	451165	+	N	CDS	dihydrolipoyl dehydrogenase	6	P:GO:0045454; F:GO:0000166; F:GO:0004148; F:GO:0016491; F:GO:0016668; F:GO:0050660	P:cell redox homeostasis; F:nucleotide binding; F:dihydrolipoyl dehydrogenase activity; F:oxidoreductase activity; F:oxidoreductase activity, acting on a sulfur group of donors, NAD(P) as acceptor; F:flavin adenine dinucleotide binding	COG1249@1|root,COG1249@2|Bacteria,1MU2U@1224|Proteobacteria,2VI6G@28216|Betaproteobacteria,1K1N0@119060|Burkholderiaceae	C	Dehydrogenase	K00382	DLD, lpd, pdhD; dihydrolipoamide dehydrogenase	[EC:1.8.1.4]	Glycolysis / Gluconeogenesis	Carbohydrate metabolism	Metabolism	PF07992	Pyridine nucleotide-disulphide oxidoreductase	-	1.8.1.-	-	1
NZ_CP052867	chromosome	chromosome:1	HJC54_RS14755	449734	451165	+	N	CDS	dihydrolipoyl dehydrogenase	6	P:GO:0045454; F:GO:0000166; F:GO:0004148; F:GO:0016491; F:GO:0016668; F:GO:0050660	P:cell redox homeostasis; F:nucleotide binding; F:dihydrolipoyl dehydrogenase activity; F:oxidoreductase activity; F:oxidoreductase activity, acting on a sulfur group of donors, NAD(P) as acceptor; F:flavin adenine dinucleotide binding	COG1249@1|root,COG1249@2|Bacteria,1MU2U@1224|Proteobacteria,2VI6G@28216|Betaproteobacteria,1K1N0@119060|Burkholderiaceae	C	Dehydrogenase	K00382	DLD, lpd, pdhD; dihydrolipoamide dehydrogenase	[EC:1.8.1.4]	Glycolysis / Gluconeogenesis	Carbohydrate metabolism	Metabolism	PF02852	Pyridine nucleotide-disulphide oxidoreductase, dimerisation domain	-	1.8.1.-	-	1
NZ_CP052867	chromosome	chromosome:1	HJC54_RS14755	449734	451165	+	N	CDS	dihydrolipoyl dehydrogenase	6	P:GO:0045454; F:GO:0000166; F:GO:0004148; F:GO:0016491; F:GO:0016668; F:GO:0050660	P:cell redox homeostasis; F:nucleotide binding; F:dihydrolipoyl dehydrogenase activity; F:oxidoreductase activity; F:oxidoreductase activity, acting on a sulfur group of donors, NAD(P) as acceptor; F:flavin adenine dinucleotide binding	COG1249@1|root,COG1249@2|Bacteria,1MU2U@1224|Proteobacteria,2VI6G@28216|Betaproteobacteria,1K1N0@119060|Burkholderiaceae	C	Dehydrogenase	K00382	DLD, lpd, pdhD; dihydrolipoamide dehydrogenase	[EC:1.8.1.4]	Citrate cycle (TCA cycle)	Carbohydrate metabolism	Metabolism	PF07992	Pyridine nucleotide-disulphide oxidoreductase	-	1.8.1.-	-	1
NZ_CP052867	chromosome	chromosome:1	HJC54_RS14755	449734	451165	+	N	CDS	dihydrolipoyl dehydrogenase	6	P:GO:0045454; F:GO:0000166; F:GO:0004148; F:GO:0016491; F:GO:0016668; F:GO:0050660	P:cell redox homeostasis; F:nucleotide binding; F:dihydrolipoyl dehydrogenase activity; F:oxidoreductase activity; F:oxidoreductase activity, acting on a sulfur group of donors, NAD(P) as acceptor; F:flavin adenine dinucleotide binding	COG1249@1|root,COG1249@2|Bacteria,1MU2U@1224|Proteobacteria,2VI6G@28216|Betaproteobacteria,1K1N0@119060|Burkholderiaceae	C	Dehydrogenase	K00382	DLD, lpd, pdhD; dihydrolipoamide dehydrogenase	[EC:1.8.1.4]	Citrate cycle (TCA cycle)	Carbohydrate metabolism	Metabolism	PF02852	Pyridine nucleotide-disulphide oxidoreductase, dimerisation domain	-	1.8.1.-	-	1
NZ_CP052867	chromosome	chromosome:1	HJC54_RS14755	449734	451165	+	N	CDS	dihydrolipoyl dehydrogenase	6	P:GO:0045454; F:GO:0000166; F:GO:0004148; F:GO:0016491; F:GO:0016668; F:GO:0050660	P:cell redox homeostasis; F:nucleotide binding; F:dihydrolipoyl dehydrogenase activity; F:oxidoreductase activity; F:oxidoreductase activity, acting on a sulfur group of donors, NAD(P) as acceptor; F:flavin adenine dinucleotide binding	COG1249@1|root,COG1249@2|Bacteria,1MU2U@1224|Proteobacteria,2VI6G@28216|Betaproteobacteria,1K1N0@119060|Burkholderiaceae	C	Dehydrogenase	K00382	DLD, lpd, pdhD; dihydrolipoamide dehydrogenase	[EC:1.8.1.4]	Pyruvate metabolism	Carbohydrate metabolism	Metabolism	PF07992	Pyridine nucleotide-disulphide oxidoreductase	-	1.8.1.-	-	1
NZ_CP052867	chromosome	chromosome:1	HJC54_RS14755	449734	451165	+	N	CDS	dihydrolipoyl dehydrogenase	6	P:GO:0045454; F:GO:0000166; F:GO:0004148; F:GO:0016491; F:GO:0016668; F:GO:0050660	P:cell redox homeostasis; F:nucleotide binding; F:dihydrolipoyl dehydrogenase activity; F:oxidoreductase activity; F:oxidoreductase activity, acting on a sulfur group of donors, NAD(P) as acceptor; F:flavin adenine dinucleotide binding	COG1249@1|root,COG1249@2|Bacteria,1MU2U@1224|Proteobacteria,2VI6G@28216|Betaproteobacteria,1K1N0@119060|Burkholderiaceae	C	Dehydrogenase	K00382	DLD, lpd, pdhD; dihydrolipoamide dehydrogenase	[EC:1.8.1.4]	Pyruvate metabolism	Carbohydrate metabolism	Metabolism	PF02852	Pyridine nucleotide-disulphide oxidoreductase, dimerisation domain	-	1.8.1.-	-	1
NZ_CP052867	chromosome	chromosome:1	HJC54_RS14755	449734	451165	+	N	CDS	dihydrolipoyl dehydrogenase	6	P:GO:0045454; F:GO:0000166; F:GO:0004148; F:GO:0016491; F:GO:0016668; F:GO:0050660	P:cell redox homeostasis; F:nucleotide binding; F:dihydrolipoyl dehydrogenase activity; F:oxidoreductase activity; F:oxidoreductase activity, acting on a sulfur group of donors, NAD(P) as acceptor; F:flavin adenine dinucleotide binding	COG1249@1|root,COG1249@2|Bacteria,1MU2U@1224|Proteobacteria,2VI6G@28216|Betaproteobacteria,1K1N0@119060|Burkholderiaceae	C	Dehydrogenase	K00382	DLD, lpd, pdhD; dihydrolipoamide dehydrogenase	[EC:1.8.1.4]	Glyoxylate and dicarboxylate metabolism	Carbohydrate metabolism	Metabolism	PF07992	Pyridine nucleotide-disulphide oxidoreductase	-	1.8.1.-	-	1
NZ_CP052867	chromosome	chromosome:1	HJC54_RS14755	449734	451165	+	N	CDS	dihydrolipoyl dehydrogenase	6	P:GO:0045454; F:GO:0000166; F:GO:0004148; F:GO:0016491; F:GO:0016668; F:GO:0050660	P:cell redox homeostasis; F:nucleotide binding; F:dihydrolipoyl dehydrogenase activity; F:oxidoreductase activity; F:oxidoreductase activity, acting on a sulfur group of donors, NAD(P) as acceptor; F:flavin adenine dinucleotide binding	COG1249@1|root,COG1249@2|Bacteria,1MU2U@1224|Proteobacteria,2VI6G@28216|Betaproteobacteria,1K1N0@119060|Burkholderiaceae	C	Dehydrogenase	K00382	DLD, lpd, pdhD; dihydrolipoamide dehydrogenase	[EC:1.8.1.4]	Glyoxylate and dicarboxylate metabolism	Carbohydrate metabolism	Metabolism	PF02852	Pyridine nucleotide-disulphide oxidoreductase, dimerisation domain	-	1.8.1.-	-	1
NZ_CP052867	chromosome	chromosome:1	HJC54_RS14755	449734	451165	+	N	CDS	dihydrolipoyl dehydrogenase	6	P:GO:0045454; F:GO:0000166; F:GO:0004148; F:GO:0016491; F:GO:0016668; F:GO:0050660	P:cell redox homeostasis; F:nucleotide binding; F:dihydrolipoyl dehydrogenase activity; F:oxidoreductase activity; F:oxidoreductase activity, acting on a sulfur group of donors, NAD(P) as acceptor; F:flavin adenine dinucleotide binding	COG1249@1|root,COG1249@2|Bacteria,1MU2U@1224|Proteobacteria,2VI6G@28216|Betaproteobacteria,1K1N0@119060|Burkholderiaceae	C	Dehydrogenase	K00382	DLD, lpd, pdhD; dihydrolipoamide dehydrogenase	[EC:1.8.1.4]	Propanoate metabolism	Carbohydrate metabolism	Metabolism	PF07992	Pyridine nucleotide-disulphide oxidoreductase	-	1.8.1.-	-	1
NZ_CP052867	chromosome	chromosome:1	HJC54_RS14755	449734	451165	+	N	CDS	dihydrolipoyl dehydrogenase	6	P:GO:0045454; F:GO:0000166; F:GO:0004148; F:GO:0016491; F:GO:0016668; F:GO:0050660	P:cell redox homeostasis; F:nucleotide binding; F:dihydrolipoyl dehydrogenase activity; F:oxidoreductase activity; F:oxidoreductase activity, acting on a sulfur group of donors, NAD(P) as acceptor; F:flavin adenine dinucleotide binding	COG1249@1|root,COG1249@2|Bacteria,1MU2U@1224|Proteobacteria,2VI6G@28216|Betaproteobacteria,1K1N0@119060|Burkholderiaceae	C	Dehydrogenase	K00382	DLD, lpd, pdhD; dihydrolipoamide dehydrogenase	[EC:1.8.1.4]	Propanoate metabolism	Carbohydrate metabolism	Metabolism	PF02852	Pyridine nucleotide-disulphide oxidoreductase, dimerisation domain	-	1.8.1.-	-	1
NZ_CP052867	chromosome	chromosome:1	HJC54_RS14755	449734	451165	+	N	CDS	dihydrolipoyl dehydrogenase	6	P:GO:0045454; F:GO:0000166; F:GO:0004148; F:GO:0016491; F:GO:0016668; F:GO:0050660	P:cell redox homeostasis; F:nucleotide binding; F:dihydrolipoyl dehydrogenase activity; F:oxidoreductase activity; F:oxidoreductase activity, acting on a sulfur group of donors, NAD(P) as acceptor; F:flavin adenine dinucleotide binding	COG1249@1|root,COG1249@2|Bacteria,1MU2U@1224|Proteobacteria,2VI6G@28216|Betaproteobacteria,1K1N0@119060|Burkholderiaceae	C	Dehydrogenase	K00382	DLD, lpd, pdhD; dihydrolipoamide dehydrogenase	[EC:1.8.1.4]	Glycine, serine and threonine metabolism	Amino acid metabolism	Metabolism	PF07992	Pyridine nucleotide-disulphide oxidoreductase	-	1.8.1.-	-	1
NZ_CP052867	chromosome	chromosome:1	HJC54_RS14755	449734	451165	+	N	CDS	dihydrolipoyl dehydrogenase	6	P:GO:0045454; F:GO:0000166; F:GO:0004148; F:GO:0016491; F:GO:0016668; F:GO:0050660	P:cell redox homeostasis; F:nucleotide binding; F:dihydrolipoyl dehydrogenase activity; F:oxidoreductase activity; F:oxidoreductase activity, acting on a sulfur group of donors, NAD(P) as acceptor; F:flavin adenine dinucleotide binding	COG1249@1|root,COG1249@2|Bacteria,1MU2U@1224|Proteobacteria,2VI6G@28216|Betaproteobacteria,1K1N0@119060|Burkholderiaceae	C	Dehydrogenase	K00382	DLD, lpd, pdhD; dihydrolipoamide dehydrogenase	[EC:1.8.1.4]	Glycine, serine and threonine metabolism	Amino acid metabolism	Metabolism	PF02852	Pyridine nucleotide-disulphide oxidoreductase, dimerisation domain	-	1.8.1.-	-	1
NZ_CP052867	chromosome	chromosome:1	HJC54_RS14755	449734	451165	+	N	CDS	dihydrolipoyl dehydrogenase	6	P:GO:0045454; F:GO:0000166; F:GO:0004148; F:GO:0016491; F:GO:0016668; F:GO:0050660	P:cell redox homeostasis; F:nucleotide binding; F:dihydrolipoyl dehydrogenase activity; F:oxidoreductase activity; F:oxidoreductase activity, acting on a sulfur group of donors, NAD(P) as acceptor; F:flavin adenine dinucleotide binding	COG1249@1|root,COG1249@2|Bacteria,1MU2U@1224|Proteobacteria,2VI6G@28216|Betaproteobacteria,1K1N0@119060|Burkholderiaceae	C	Dehydrogenase	K00382	DLD, lpd, pdhD; dihydrolipoamide dehydrogenase	[EC:1.8.1.4]	Valine, leucine and isoleucine degradation	Amino acid metabolism	Metabolism	PF07992	Pyridine nucleotide-disulphide oxidoreductase	-	1.8.1.-	-	1
NZ_CP052867	chromosome	chromosome:1	HJC54_RS14755	449734	451165	+	N	CDS	dihydrolipoyl dehydrogenase	6	P:GO:0045454; F:GO:0000166; F:GO:0004148; F:GO:0016491; F:GO:0016668; F:GO:0050660	P:cell redox homeostasis; F:nucleotide binding; F:dihydrolipoyl dehydrogenase activity; F:oxidoreductase activity; F:oxidoreductase activity, acting on a sulfur group of donors, NAD(P) as acceptor; F:flavin adenine dinucleotide binding	COG1249@1|root,COG1249@2|Bacteria,1MU2U@1224|Proteobacteria,2VI6G@28216|Betaproteobacteria,1K1N0@119060|Burkholderiaceae	C	Dehydrogenase	K00382	DLD, lpd, pdhD; dihydrolipoamide dehydrogenase	[EC:1.8.1.4]	Valine, leucine and isoleucine degradation	Amino acid metabolism	Metabolism	PF02852	Pyridine nucleotide-disulphide oxidoreductase, dimerisation domain	-	1.8.1.-	-	1
NZ_CP052867	chromosome	chromosome:1	HJC54_RS14755	449734	451165	+	N	CDS	dihydrolipoyl dehydrogenase	6	P:GO:0045454; F:GO:0000166; F:GO:0004148; F:GO:0016491; F:GO:0016668; F:GO:0050660	P:cell redox homeostasis; F:nucleotide binding; F:dihydrolipoyl dehydrogenase activity; F:oxidoreductase activity; F:oxidoreductase activity, acting on a sulfur group of donors, NAD(P) as acceptor; F:flavin adenine dinucleotide binding	COG1249@1|root,COG1249@2|Bacteria,1MU2U@1224|Proteobacteria,2VI6G@28216|Betaproteobacteria,1K1N0@119060|Burkholderiaceae	C	Dehydrogenase	K00382	DLD, lpd, pdhD; dihydrolipoamide dehydrogenase	[EC:1.8.1.4]	Lysine degradation	Amino acid metabolism	Metabolism	PF07992	Pyridine nucleotide-disulphide oxidoreductase	-	1.8.1.-	-	1
NZ_CP052867	chromosome	chromosome:1	HJC54_RS14755	449734	451165	+	N	CDS	dihydrolipoyl dehydrogenase	6	P:GO:0045454; F:GO:0000166; F:GO:0004148; F:GO:0016491; F:GO:0016668; F:GO:0050660	P:cell redox homeostasis; F:nucleotide binding; F:dihydrolipoyl dehydrogenase activity; F:oxidoreductase activity; F:oxidoreductase activity, acting on a sulfur group of donors, NAD(P) as acceptor; F:flavin adenine dinucleotide binding	COG1249@1|root,COG1249@2|Bacteria,1MU2U@1224|Proteobacteria,2VI6G@28216|Betaproteobacteria,1K1N0@119060|Burkholderiaceae	C	Dehydrogenase	K00382	DLD, lpd, pdhD; dihydrolipoamide dehydrogenase	[EC:1.8.1.4]	Lysine degradation	Amino acid metabolism	Metabolism	PF02852	Pyridine nucleotide-disulphide oxidoreductase, dimerisation domain	-	1.8.1.-	-	1
NZ_CP052867	chromosome	chromosome:1	HJC54_RS14755	449734	451165	+	N	CDS	dihydrolipoyl dehydrogenase	6	P:GO:0045454; F:GO:0000166; F:GO:0004148; F:GO:0016491; F:GO:0016668; F:GO:0050660	P:cell redox homeostasis; F:nucleotide binding; F:dihydrolipoyl dehydrogenase activity; F:oxidoreductase activity; F:oxidoreductase activity, acting on a sulfur group of donors, NAD(P) as acceptor; F:flavin adenine dinucleotide binding	COG1249@1|root,COG1249@2|Bacteria,1MU2U@1224|Proteobacteria,2VI6G@28216|Betaproteobacteria,1K1N0@119060|Burkholderiaceae	C	Dehydrogenase	K00382	DLD, lpd, pdhD; dihydrolipoamide dehydrogenase	[EC:1.8.1.4]	Tryptophan metabolism	Amino acid metabolism	Metabolism	PF07992	Pyridine nucleotide-disulphide oxidoreductase	-	1.8.1.-	-	1
NZ_CP052867	chromosome	chromosome:1	HJC54_RS14755	449734	451165	+	N	CDS	dihydrolipoyl dehydrogenase	6	P:GO:0045454; F:GO:0000166; F:GO:0004148; F:GO:0016491; F:GO:0016668; F:GO:0050660	P:cell redox homeostasis; F:nucleotide binding; F:dihydrolipoyl dehydrogenase activity; F:oxidoreductase activity; F:oxidoreductase activity, acting on a sulfur group of donors, NAD(P) as acceptor; F:flavin adenine dinucleotide binding	COG1249@1|root,COG1249@2|Bacteria,1MU2U@1224|Proteobacteria,2VI6G@28216|Betaproteobacteria,1K1N0@119060|Burkholderiaceae	C	Dehydrogenase	K00382	DLD, lpd, pdhD; dihydrolipoamide dehydrogenase	[EC:1.8.1.4]	Tryptophan metabolism	Amino acid metabolism	Metabolism	PF02852	Pyridine nucleotide-disulphide oxidoreductase, dimerisation domain	-	1.8.1.-	-	1
NZ_CP052867	chromosome	chromosome:1	HJC54_RS14765	452563	453007	+	N	CDS	transposase				COG3293@1|root,COG3293@2|Bacteria,1RAWR@1224|Proteobacteria,2VTFP@28216|Betaproteobacteria,1K8M2@119060|Burkholderiaceae	L	Putative transposase of IS4/5 family (DUF4096)							PF13340	Putative transposase of IS4/5 family (DUF4096)
NZ_CP052867	chromosome	chromosome:1	HJC54_RS14770	453109	453571	-	N	CDS	DUF2147 domain-containing protein				COG4731@1|root,COG4731@2|Bacteria,1N19Y@1224|Proteobacteria,2VTB1@28216|Betaproteobacteria,1KH7M@119060|Burkholderiaceae	S	Uncharacterized protein conserved in bacteria (DUF2147)							PF09917	Uncharacterized protein conserved in bacteria (DUF2147)
NZ_CP052867	chromosome	chromosome:1	HJC54_RS14775	453710	455393	-	N	CDS	ShlB/FhaC/HecB family hemolysin secretion/activation protein				COG2831@1|root,COG2831@2|Bacteria,1R43A@1224|Proteobacteria,2VN1X@28216|Betaproteobacteria,1K1EM@119060|Burkholderiaceae	U	PFAM Polypeptide-transport-associated domain protein ShlB-type							PF03865	Haemolysin secretion/activation protein ShlB/FhaC/HecB
NZ_CP052867	chromosome	chromosome:1	HJC54_RS14775	453710	455393	-	N	CDS	ShlB/FhaC/HecB family hemolysin secretion/activation protein				COG2831@1|root,COG2831@2|Bacteria,1R43A@1224|Proteobacteria,2VN1X@28216|Betaproteobacteria,1K1EM@119060|Burkholderiaceae	U	PFAM Polypeptide-transport-associated domain protein ShlB-type							PF08479	POTRA domain, ShlB-type
NZ_CP052867	chromosome	chromosome:1	HJC54_RS14780	455528	456899	-	N	CDS	collagen-like triple helix repeat-containing protein				2DBJM@1|root,2Z9MP@2|Bacteria,1R48J@1224|Proteobacteria,2VJH4@28216|Betaproteobacteria,1K0HH@119060|Burkholderiaceae	S	Bacterial collagen, middle region							PF15984	Bacterial collagen, middle region
NZ_CP052867	chromosome	chromosome:1	HJC54_RS14785	456946	458782	-	N	CDS	collagen-like triple helix repeat-containing protein				2DBJM@1|root,2Z9MP@2|Bacteria,1R48J@1224|Proteobacteria,2VJH4@28216|Betaproteobacteria,1K3ZZ@119060|Burkholderiaceae	S	Bacterial collagen, middle region							PF15984	Bacterial collagen, middle region
NZ_CP052867	chromosome	chromosome:1	HJC54_RS14790	459435	459633	+	N	CDS	Flp family type IVb pilin	2	C:GO:0016020; C:GO:0016021	C:membrane; C:integral component of membrane	COG3847@1|root,COG3847@2|Bacteria,1PUR6@1224|Proteobacteria,2W62Y@28216|Betaproteobacteria	U	Flp/Fap pilin component	K02651	flp, pilA; pilus assembly protein Flp/PilA		Cell cycle - Caulobacter	Cell growth and death	Cellular Processes	PF04964	Flp/Fap pilin component
NZ_CP052867	chromosome	chromosome:1	HJC54_RS14800	460213	460684	+	N	CDS	pilus assembly protein	2	C:GO:0016020; C:GO:0016021	C:membrane; C:integral component of membrane	COG4961@1|root,COG4961@2|Bacteria,1NAK6@1224|Proteobacteria,2VX8Z@28216|Betaproteobacteria,1K8U3@119060|Burkholderiaceae	U	PFAM TadE family protein							PF07811	TadE-like protein
NZ_CP052867	chromosome	chromosome:1	HJC54_RS14835	467994	468849	+	N	CDS	tetratricopeptide repeat protein				COG5010@1|root,COG5010@2|Bacteria,1QTW7@1224|Proteobacteria,2VU0Q@28216|Betaproteobacteria,1K3TK@119060|Burkholderiaceae	U	SMART Tetratricopeptide domain protein
NZ_CP052867	chromosome	chromosome:1	HJC54_RS14840	468992	469376	+	N	CDS	DUF3613 domain-containing protein				2DR0C@1|root,339NA@2|Bacteria,1NGC5@1224|Proteobacteria,2VXR5@28216|Betaproteobacteria,1KABW@119060|Burkholderiaceae	S	Protein of unknown function (DUF3613)							PF12266	Protein of unknown function (DUF3613)
NZ_CP052867	chromosome	chromosome:1	HJC54_RS14845	469390	471253	+	N	CDS	membrane protein	2	C:GO:0016020; C:GO:0016021	C:membrane; C:integral component of membrane	COG4655@1|root,COG4655@2|Bacteria,1R41B@1224|Proteobacteria,2VK02@28216|Betaproteobacteria,1K1HT@119060|Burkholderiaceae	S	Putative Tad-like Flp pilus-assembly							PF09977	Putative Tad-like Flp pilus-assembly
NZ_CP052867	chromosome	chromosome:1	HJC54_RS14850	471272	472664	+	N	CDS	sigma-54 dependent transcriptional regulator	5	P:GO:0006355; F:GO:0000166; F:GO:0003677; F:GO:0005524; F:GO:0043565	P:regulation of transcription, DNA-templated; F:nucleotide binding; F:DNA binding; F:ATP binding; F:sequence-specific DNA binding	COG2204@1|root,COG2204@2|Bacteria,1QHF8@1224|Proteobacteria,2VJWV@28216|Betaproteobacteria,1K2Z0@119060|Burkholderiaceae	K	Transcriptional regulator							PF00158	Sigma-54 interaction domain
NZ_CP052867	chromosome	chromosome:1	HJC54_RS14850	471272	472664	+	N	CDS	sigma-54 dependent transcriptional regulator	5	P:GO:0006355; F:GO:0000166; F:GO:0003677; F:GO:0005524; F:GO:0043565	P:regulation of transcription, DNA-templated; F:nucleotide binding; F:DNA binding; F:ATP binding; F:sequence-specific DNA binding	COG2204@1|root,COG2204@2|Bacteria,1QHF8@1224|Proteobacteria,2VJWV@28216|Betaproteobacteria,1K2Z0@119060|Burkholderiaceae	K	Transcriptional regulator							PF02954	Bacterial regulatory protein, Fis family
NZ_CP052867	chromosome	chromosome:1	HJC54_RS14855	472717	473437	+	N	CDS	DUF2968 domain-containing protein				2AU3B@1|root,31JPS@2|Bacteria,1MYCB@1224|Proteobacteria,2VTJG@28216|Betaproteobacteria,1K2IR@119060|Burkholderiaceae	S	Protein of unknown function (DUF2968)							PF11180	Protein of unknown function (DUF2968)
NZ_CP052867	chromosome	chromosome:1	HJC54_RS14860	473605	474169	-	N	CDS	RNA chaperone Hfq	2	P:GO:0006355; F:GO:0003723	P:regulation of transcription, DNA-templated; F:RNA binding	COG1923@1|root,COG1923@2|Bacteria,1NMD4@1224|Proteobacteria,2W4QW@28216|Betaproteobacteria,1K67F@119060|Burkholderiaceae	S	RNA chaperone that binds small regulatory RNA (sRNAs) and mRNAs to facilitate mRNA translational regulation in response to envelope stress, environmental stress and changes in metabolite concentrations. Also binds with high specificity to tRNAs	K03666	hfq; host factor-I protein		RNA degradation	Folding, sorting and degradation	Genetic Information Processing	PF17209	Hfq protein								C5AGX2	reduced virulence
NZ_CP052867	chromosome	chromosome:1	HJC54_RS14860	473605	474169	-	N	CDS	RNA chaperone Hfq	2	P:GO:0006355; F:GO:0003723	P:regulation of transcription, DNA-templated; F:RNA binding	COG1923@1|root,COG1923@2|Bacteria,1NMD4@1224|Proteobacteria,2W4QW@28216|Betaproteobacteria,1K67F@119060|Burkholderiaceae	S	RNA chaperone that binds small regulatory RNA (sRNAs) and mRNAs to facilitate mRNA translational regulation in response to envelope stress, environmental stress and changes in metabolite concentrations. Also binds with high specificity to tRNAs	K03666	hfq; host factor-I protein		Quorum sensing	Cellular community - prokaryotes	Cellular Processes	PF17209	Hfq protein								C5AGX2	reduced virulence
NZ_CP052867	chromosome	chromosome:1	HJC54_RS14860	473605	474169	-	N	CDS	RNA chaperone Hfq	2	P:GO:0006355; F:GO:0003723	P:regulation of transcription, DNA-templated; F:RNA binding	COG1923@1|root,COG1923@2|Bacteria,1NMD4@1224|Proteobacteria,2W4QW@28216|Betaproteobacteria,1K67F@119060|Burkholderiaceae	S	RNA chaperone that binds small regulatory RNA (sRNAs) and mRNAs to facilitate mRNA translational regulation in response to envelope stress, environmental stress and changes in metabolite concentrations. Also binds with high specificity to tRNAs	K03666	hfq; host factor-I protein		Biofilm formation - Vibrio cholerae	Cellular community - prokaryotes	Cellular Processes	PF17209	Hfq protein								C5AGX2	reduced virulence
NZ_CP052867	chromosome	chromosome:1	HJC54_RS14865	474495	475413	-	N	CDS	DUF1571 domain-containing protein				28HZ5@1|root,2Z84D@2|Bacteria,1R8A4@1224|Proteobacteria,2VM39@28216|Betaproteobacteria,1K4E1@119060|Burkholderiaceae	S	Protein of unknown function (DUF1571)							PF07608	Protein of unknown function (DUF1571)
NZ_CP052867	chromosome	chromosome:1	HJC54_RS14870	475460	477215	-	N	CDS	AMP-binding protein	1	F:GO:0016874	F:ligase activity	COG0318@1|root,COG0318@2|Bacteria,1MU6G@1224|Proteobacteria,2VI0I@28216|Betaproteobacteria,1JZTX@119060|Burkholderiaceae	IQ	PFAM AMP-dependent synthetase and ligase	K01897	ACSL, fadD; long-chain acyl-CoA synthetase	[EC:6.2.1.3]	Fatty acid biosynthesis	Lipid metabolism	Metabolism	PF13193	AMP-binding enzyme C-terminal domain	-	6.2.1.-	-	1
NZ_CP052867	chromosome	chromosome:1	HJC54_RS14870	475460	477215	-	N	CDS	AMP-binding protein	1	F:GO:0016874	F:ligase activity	COG0318@1|root,COG0318@2|Bacteria,1MU6G@1224|Proteobacteria,2VI0I@28216|Betaproteobacteria,1JZTX@119060|Burkholderiaceae	IQ	PFAM AMP-dependent synthetase and ligase	K01897	ACSL, fadD; long-chain acyl-CoA synthetase	[EC:6.2.1.3]	Fatty acid biosynthesis	Lipid metabolism	Metabolism	PF00501	AMP-binding enzyme	-	6.2.1.-	-	1
NZ_CP052867	chromosome	chromosome:1	HJC54_RS14870	475460	477215	-	N	CDS	AMP-binding protein	1	F:GO:0016874	F:ligase activity	COG0318@1|root,COG0318@2|Bacteria,1MU6G@1224|Proteobacteria,2VI0I@28216|Betaproteobacteria,1JZTX@119060|Burkholderiaceae	IQ	PFAM AMP-dependent synthetase and ligase	K01897	ACSL, fadD; long-chain acyl-CoA synthetase	[EC:6.2.1.3]	Fatty acid degradation	Lipid metabolism	Metabolism	PF13193	AMP-binding enzyme C-terminal domain	-	6.2.1.-	-	1
NZ_CP052867	chromosome	chromosome:1	HJC54_RS14870	475460	477215	-	N	CDS	AMP-binding protein	1	F:GO:0016874	F:ligase activity	COG0318@1|root,COG0318@2|Bacteria,1MU6G@1224|Proteobacteria,2VI0I@28216|Betaproteobacteria,1JZTX@119060|Burkholderiaceae	IQ	PFAM AMP-dependent synthetase and ligase	K01897	ACSL, fadD; long-chain acyl-CoA synthetase	[EC:6.2.1.3]	Fatty acid degradation	Lipid metabolism	Metabolism	PF00501	AMP-binding enzyme	-	6.2.1.-	-	1
NZ_CP052867	chromosome	chromosome:1	HJC54_RS14870	475460	477215	-	N	CDS	AMP-binding protein	1	F:GO:0016874	F:ligase activity	COG0318@1|root,COG0318@2|Bacteria,1MU6G@1224|Proteobacteria,2VI0I@28216|Betaproteobacteria,1JZTX@119060|Burkholderiaceae	IQ	PFAM AMP-dependent synthetase and ligase	K01897	ACSL, fadD; long-chain acyl-CoA synthetase	[EC:6.2.1.3]	Peroxisome	Transport and catabolism	Cellular Processes	PF13193	AMP-binding enzyme C-terminal domain	-	6.2.1.-	-	1
NZ_CP052867	chromosome	chromosome:1	HJC54_RS14870	475460	477215	-	N	CDS	AMP-binding protein	1	F:GO:0016874	F:ligase activity	COG0318@1|root,COG0318@2|Bacteria,1MU6G@1224|Proteobacteria,2VI0I@28216|Betaproteobacteria,1JZTX@119060|Burkholderiaceae	IQ	PFAM AMP-dependent synthetase and ligase	K01897	ACSL, fadD; long-chain acyl-CoA synthetase	[EC:6.2.1.3]	Peroxisome	Transport and catabolism	Cellular Processes	PF00501	AMP-binding enzyme	-	6.2.1.-	-	1
NZ_CP052867	chromosome	chromosome:1	HJC54_RS14870	475460	477215	-	N	CDS	AMP-binding protein	1	F:GO:0016874	F:ligase activity	COG0318@1|root,COG0318@2|Bacteria,1MU6G@1224|Proteobacteria,2VI0I@28216|Betaproteobacteria,1JZTX@119060|Burkholderiaceae	IQ	PFAM AMP-dependent synthetase and ligase	K01897	ACSL, fadD; long-chain acyl-CoA synthetase	[EC:6.2.1.3]	Ferroptosis	Cell growth and death	Cellular Processes	PF13193	AMP-binding enzyme C-terminal domain	-	6.2.1.-	-	1
NZ_CP052867	chromosome	chromosome:1	HJC54_RS14870	475460	477215	-	N	CDS	AMP-binding protein	1	F:GO:0016874	F:ligase activity	COG0318@1|root,COG0318@2|Bacteria,1MU6G@1224|Proteobacteria,2VI0I@28216|Betaproteobacteria,1JZTX@119060|Burkholderiaceae	IQ	PFAM AMP-dependent synthetase and ligase	K01897	ACSL, fadD; long-chain acyl-CoA synthetase	[EC:6.2.1.3]	Ferroptosis	Cell growth and death	Cellular Processes	PF00501	AMP-binding enzyme	-	6.2.1.-	-	1
NZ_CP052867	chromosome	chromosome:1	HJC54_RS14870	475460	477215	-	N	CDS	AMP-binding protein	1	F:GO:0016874	F:ligase activity	COG0318@1|root,COG0318@2|Bacteria,1MU6G@1224|Proteobacteria,2VI0I@28216|Betaproteobacteria,1JZTX@119060|Burkholderiaceae	IQ	PFAM AMP-dependent synthetase and ligase	K01897	ACSL, fadD; long-chain acyl-CoA synthetase	[EC:6.2.1.3]	Quorum sensing	Cellular community - prokaryotes	Cellular Processes	PF13193	AMP-binding enzyme C-terminal domain	-	6.2.1.-	-	1
NZ_CP052867	chromosome	chromosome:1	HJC54_RS14870	475460	477215	-	N	CDS	AMP-binding protein	1	F:GO:0016874	F:ligase activity	COG0318@1|root,COG0318@2|Bacteria,1MU6G@1224|Proteobacteria,2VI0I@28216|Betaproteobacteria,1JZTX@119060|Burkholderiaceae	IQ	PFAM AMP-dependent synthetase and ligase	K01897	ACSL, fadD; long-chain acyl-CoA synthetase	[EC:6.2.1.3]	Quorum sensing	Cellular community - prokaryotes	Cellular Processes	PF00501	AMP-binding enzyme	-	6.2.1.-	-	1
NZ_CP052867	chromosome	chromosome:1	HJC54_RS14870	475460	477215	-	N	CDS	AMP-binding protein	1	F:GO:0016874	F:ligase activity	COG0318@1|root,COG0318@2|Bacteria,1MU6G@1224|Proteobacteria,2VI0I@28216|Betaproteobacteria,1JZTX@119060|Burkholderiaceae	IQ	PFAM AMP-dependent synthetase and ligase	K01897	ACSL, fadD; long-chain acyl-CoA synthetase	[EC:6.2.1.3]	Adipocytokine signaling pathway	Endocrine system	Organismal Systems	PF13193	AMP-binding enzyme C-terminal domain	-	6.2.1.-	-	1
NZ_CP052867	chromosome	chromosome:1	HJC54_RS14870	475460	477215	-	N	CDS	AMP-binding protein	1	F:GO:0016874	F:ligase activity	COG0318@1|root,COG0318@2|Bacteria,1MU6G@1224|Proteobacteria,2VI0I@28216|Betaproteobacteria,1JZTX@119060|Burkholderiaceae	IQ	PFAM AMP-dependent synthetase and ligase	K01897	ACSL, fadD; long-chain acyl-CoA synthetase	[EC:6.2.1.3]	Adipocytokine signaling pathway	Endocrine system	Organismal Systems	PF00501	AMP-binding enzyme	-	6.2.1.-	-	1
[truncated: 8,965 more rows]

## Sheet: HN2_anno
Genome annotation of Burkholderia glumae strains HN2
[truncated: 9,467 more rows]
