# Supplementary material for: Next Generation Sequencing and Comparative Genomic Analysis Reveal Extreme Plasticity of Two Burkholderia glumae Strains HN1 and HN2
Source: Pathogens. 2022 Oct 30;11(11):1265. doi: 10.3390/pathogens11111265 (PMC9698995; doi:10.3390/pathogens11111265)
Supplement: Supplementary file 1 [file pathogens-11-01265-s001.zip › Table S5 genomic island.xlsx]

## Sheet: HN1
genomic islands information of Burkholderia glumae strain HN1
Chr	Island start	Island end	Length	Method	Gene name	Gene ID	Locus	Gene start	Gene end	Strand	Product
Chr1	9894	14007	4113	Predicted by at least one method			HJC54_RS12770	11353	12076	1	LuxR family transcriptional regulator
Chr1	9894	14007	4113	Predicted by at least one method			HJC54_RS12775	12102	13211	-1	pyruvate dehydrogenase
Chr1	9894	14007	4113	Predicted by at least one method			HJC54_RS12780	13291	13916	-1	glutathione S-transferase N-terminal domain-containing protein
Chr1	23532	30950	7418	Predicted by at least one method			HJC54_RS12830	23128	26876	1	response regulator
Chr1	23532	30950	7418	Predicted by at least one method	WP_012735139.1		HJC54_RS12835	26999	27316	-1	hypothetical protein
Chr1	23532	30950	7418	Predicted by at least one method			HJC54_RS12840	27651	29189	1	class I SAM-dependent methyltransferase
Chr1	23532	30950	7418	Predicted by at least one method			HJC54_RS12845	29349	30859	1	MFS transporter
Chr1	134960	146018	11058	Predicted by at least one method	WP_169511727.1		HJC54_RS13325	134960	135583	-1	chemotaxis protein CheB
Chr1	134960	146018	11058	Predicted by at least one method	WP_169511728.1		HJC54_RS13330	135642	136490	-1	protein-glutamate O-methyltransferase CheR
Chr1	134960	146018	11058	Predicted by at least one method			HJC54_RS13335	136506	140054	-1	response regulator
Chr1	134960	146018	11058	Predicted by at least one method	WP_012735235.1		HJC54_RS13340	140587	140841	1	hypothetical protein
Chr1	134960	146018	11058	Predicted by at least one method	WP_012735236.1		HJC54_RS13345	141397	142830	1	AAA family ATPase
Chr1	134960	146018	11058	Predicted by at least one method	WP_012735237.1		HJC54_RS13350	142846	143514	1	DUF4276 family protein
Chr1	134960	146018	11058	Predicted by at least one method	WP_080569359.1		HJC54_RS13355	144110	144289	-1	integrase core domain-containing protein
Chr1	134960	146018	11058	Predicted by at least one method	WP_012735238.1		HJC54_RS13360	144356	144592	-1	hypothetical protein
Chr1	134960	146018	11058	Predicted by at least one method			HJC54_RS13365	144592	145085	-1	DUF2778 domain-containing protein
Chr1	134960	146018	11058	Predicted by at least one method	WP_012735240.1		HJC54_RS13375	145560	146018	1	histidine phosphatase family protein
Chr1	162611	186797	24186	Predicted by at least one method	WP_169511734.1		HJC54_RS13490	162611	162805	-1	hypothetical protein
Chr1	162611	186797	24186	Predicted by at least one method	WP_153477813.1		HJC54_RS13495	162891	163619	-1	immunity 52 family protein
Chr1	162611	186797	24186	Predicted by at least one method	WP_169511735.1		HJC54_RS13500	163624	164205	-1	restriction endonuclease fold toxin 5 domain-containing protein
Chr1	162611	186797	24186	Predicted by at least one method	WP_169511736.1		HJC54_RS13505	164553	165056	-1	DUF4123 domain-containing protein
Chr1	162611	186797	24186	Predicted by at least one method	WP_169511737.1		HJC54_RS13510	165061	165468	-1	PAAR domain-containing protein
Chr1	162611	186797	24186	Predicted by at least one method	WP_169511738.1		HJC54_RS13515	165820	167319	-1	hypothetical protein
Chr1	162611	186797	24186	Predicted by at least one method	WP_169511739.1		HJC54_RS13520	167344	169242	-1	hypothetical protein
Chr1	162611	186797	24186	Predicted by at least one method	WP_017423134.1		HJC54_RS13525	169948	170325	1	DUF3592 domain-containing protein
Chr1	162611	186797	24186	Predicted by at least one method	WP_017423135.1		HJC54_RS13530	170347	170919	1	hypothetical protein
Chr1	162611	186797	24186	Predicted by at least one method	WP_169511740.1	tssF	HJC54_RS13535	170920	172797	-1	type VI secretion system baseplate subunit TssF
Chr1	162611	186797	24186	Predicted by at least one method	WP_015876301.1	vgrG	HJC54_RS13540	172931	175090	1	type VI secretion system tip protein VgrG
Chr1	162611	186797	24186	Predicted by at least one method	WP_015876300.1		HJC54_RS13545	175183	176472	1	hypothetical protein
Chr1	162611	186797	24186	Predicted by at least one method	WP_026051330.1		HJC54_RS13550	176469	176720	1	hypothetical protein
Chr1	162611	186797	24186	Predicted by at least one method	WP_161520742.1		HJC54_RS13555	176725	177813	1	DUF2169 domain-containing protein
Chr1	162611	186797	24186	Predicted by at least one method	WP_169511741.1		HJC54_RS13560	177810	178934	1	beta-ketoacyl synthase
Chr1	162611	186797	24186	Predicted by at least one method	WP_015876297.1		HJC54_RS13565	178904	179953	1	DUF4150 domain-containing protein
Chr1	162611	186797	24186	Predicted by at least one method	WP_080569367.1		HJC54_RS13570	180397	180984	1	DUF3396 domain-containing protein
Chr1	162611	186797	24186	Predicted by at least one method	WP_169511742.1		HJC54_RS13575	181143	182189	1	IS481 family transposase
Chr1	162611	186797	24186	Predicted by at least one method	WP_124837732.1		HJC54_RS13580	182382	183619	1	IS3 family transposase
Chr1	162611	186797	24186	Predicted by at least one method			HJC54_RS29400	183701	184353	-1	DDE-type integrase/transposase/recombinase
Chr1	162611	186797	24186	Predicted by at least one method	WP_015876294.1		HJC54_RS13600	184474	185277	-1	phytanoyl-CoA dioxygenase family protein
Chr1	162611	186797	24186	Predicted by at least one method	WP_169511744.1		HJC54_RS13605	185286	185864	-1	methyltransferase domain-containing protein
Chr1	162611	186797	24186	Predicted by at least one method			HJC54_RS13610	185923	186204	-1	glycosyltransferase
Chr1	162611	186797	24186	Predicted by at least one method	WP_127913935.1		HJC54_RS13615	186561	186797	1	hypothetical protein
Chr1	185740	190964	5224	Predicted by at least one method	WP_169511744.1		HJC54_RS13605	185286	185864	-1	methyltransferase domain-containing protein
Chr1	185740	190964	5224	Predicted by at least one method			HJC54_RS13610	185923	186204	-1	glycosyltransferase
Chr1	185740	190964	5224	Predicted by at least one method	WP_127913935.1		HJC54_RS13615	186561	186797	1	hypothetical protein
Chr1	185740	190964	5224	Predicted by at least one method	WP_169511745.1		HJC54_RS13620	187059	188105	-1	IS481 family transposase
Chr1	185740	190964	5224	Predicted by at least one method	WP_015876292.1		HJC54_RS13625	189234	189965	1	LuxR C-terminal-related transcriptional regulator
Chr1	185740	190964	5224	Predicted by at least one method	WP_017425184.1		HJC54_RS13630	189978	190226	1	hypothetical protein
Chr1	185740	190964	5224	Predicted by at least one method			HJC54_RS13635	190345	194341	1	FAD/FMN-binding oxidoreductase
Chr1	273272	278116	4844	Predicted by at least one method	WP_169511759.1		HJC54_RS13955	273378	274418	-1	questin oxidase family protein
Chr1	273272	278116	4844	Predicted by at least one method	WP_017423096.1	soxR	HJC54_RS13960	274488	274988	1	redox-sensitive transcriptional activator SoxR
Chr1	273272	278116	4844	Predicted by at least one method	WP_043225390.1		HJC54_RS13965	275002	275829	1	class I SAM-dependent methyltransferase
Chr1	273272	278116	4844	Predicted by at least one method	WP_169511760.1		HJC54_RS13970	275928	276569	1	Type 1 glutamine amidotransferase-like domain-containing protein
Chr1	273272	278116	4844	Predicted by at least one method	WP_169511761.1		HJC54_RS13975	276790	277179	1	VOC family protein
Chr1	273272	278116	4844	Predicted by at least one method	WP_017433235.1		HJC54_RS13980	277361	277948	1	class I SAM-dependent methyltransferase
Chr1	273272	278116	4844	Predicted by at least one method	WP_017423098.1		HJC54_RS13985	278026	279318	-1	NAD(P)/FAD-dependent oxidoreductase
Chr1	452564	461783	9219	Predicted by at least one method	WP_017432937.1		HJC54_RS14765	452564	453007	1	transposase
Chr1	452564	461783	9219	Predicted by at least one method	WP_015875982.1		HJC54_RS14770	453110	453571	-1	DUF2147 domain-containing protein
Chr1	452564	461783	9219	Predicted by at least one method	WP_169511794.1		HJC54_RS14775	453711	455393	-1	ShlB/FhaC/HecB family hemolysin secretion/activation protein
Chr1	452564	461783	9219	Predicted by at least one method	WP_124836419.1		HJC54_RS14780	455529	456899	-1	collagen-like triple helix repeat-containing protein
Chr1	452564	461783	9219	Predicted by at least one method	WP_169511795.1		HJC54_RS14785	456947	458782	-1	collagen-like triple helix repeat-containing protein
Chr1	452564	461783	9219	Predicted by at least one method	WP_015875977.1		HJC54_RS14790	459436	459633	1	Flp family type IVb pilin
Chr1	452564	461783	9219	Predicted by at least one method	WP_169511796.1		HJC54_RS14795	459717	460217	1	A24 family peptidase
Chr1	452564	461783	9219	Predicted by at least one method	WP_015875975.1		HJC54_RS14800	460214	460684	1	pilus assembly protein
Chr1	452564	461783	9219	Predicted by at least one method	WP_015875974.1	cpaB	HJC54_RS14805	460857	461783	1	Flp pilus assembly protein CpaB
Chr1	496297	543639	47342	Predicted by at least one method	WP_169511801.1	aat	HJC54_RS14965	496297	497040	-1	leucyl/phenylalanyl-tRNA--protein transferase
Chr1	496297	543639	47342	Predicted by at least one method	WP_015875944.1		HJC54_RS14970	497055	497600	-1	NUDIX hydrolase
Chr1	496297	543639	47342	Predicted by at least one method	WP_017922707.1		HJC54_RS14975	497905	498345	1	hypothetical protein
Chr1	496297	543639	47342	Predicted by at least one method	WP_015875942.1		HJC54_RS14980	498345	498686	1	DUF1493 family protein
Chr1	496297	543639	47342	Predicted by at least one method	WP_015875941.1		HJC54_RS14985	499697	500071	-1	hypothetical protein
Chr1	496297	543639	47342	Predicted by at least one method	WP_043225151.1		HJC54_RS14990	500174	500473	-1	hypothetical protein
Chr1	496297	543639	47342	Predicted by at least one method	WP_153477642.1		HJC54_RS14995	500470	501186	-1	hypothetical protein
Chr1	496297	543639	47342	Predicted by at least one method	WP_153477640.1		HJC54_RS15000	501227	501661	-1	hypothetical protein
Chr1	496297	543639	47342	Predicted by at least one method	WP_153477638.1		HJC54_RS15010	501989	502480	1	heme-binding protein
Chr1	496297	543639	47342	Predicted by at least one method	WP_015875939.1		HJC54_RS15015	502477	502815	1	multidrug efflux SMR transporter
Chr1	496297	543639	47342	Predicted by at least one method	WP_017433726.1		HJC54_RS15020	502880	503308	-1	hypothetical protein
Chr1	496297	543639	47342	Predicted by at least one method	WP_015875937.1	ssuD	HJC54_RS15025	503672	504832	1	FMNH2-dependent alkanesulfonate monooxygenase
Chr1	496297	543639	47342	Predicted by at least one method	WP_035979289.1	ssuC	HJC54_RS15030	504892	505683	1	aliphatic sulfonate ABC transporter permease SsuC
Chr1	496297	543639	47342	Predicted by at least one method	WP_015875935.1		HJC54_RS15035	505680	506651	1	ATP-binding cassette domain-containing protein
Chr1	496297	543639	47342	Predicted by at least one method	WP_013697841.1		HJC54_RS15040	506695	506910	1	molybdopterin-binding protein
Chr1	496297	543639	47342	Predicted by at least one method	WP_015875934.1		HJC54_RS15045	507039	507236	1	hypothetical protein
Chr1	496297	543639	47342	Predicted by at least one method	WP_015875933.1		HJC54_RS15050	507272	507526	1	hypothetical protein
Chr1	496297	543639	47342	Predicted by at least one method			HJC54_RS15055	507708	508099	-1	transposase
Chr1	496297	543639	47342	Predicted by at least one method	WP_169511802.1		HJC54_RS15060	508576	509813	1	IS3 family transposase
Chr1	496297	543639	47342	Predicted by at least one method			HJC54_RS15065	509810	510629	-1	IS5 family transposase
Chr1	496297	543639	47342	Predicted by at least one method	WP_169511803.1		HJC54_RS15070	511024	511395	1	hypothetical protein
Chr1	496297	543639	47342	Predicted by at least one method	WP_169511804.1		HJC54_RS15075	511508	512554	-1	IS481 family transposase
Chr1	496297	543639	47342	Predicted by at least one method	WP_015875913.1		HJC54_RS15080	512794	513786	-1	IS5 family transposase
Chr1	496297	543639	47342	Predicted by at least one method	WP_015875930.1		HJC54_RS15085	514118	515002	1	hypothetical protein
Chr1	496297	543639	47342	Predicted by at least one method	WP_015875929.1		HJC54_RS15090	515051	515839	1	thioesterase II family protein
Chr1	496297	543639	47342	Predicted by at least one method	WP_015875928.1		HJC54_RS15095	516039	517358	1	vanadium-dependent haloperoxidase
Chr1	496297	543639	47342	Predicted by at least one method	WP_015875927.1		HJC54_RS15100	517355	518302	1	NAD-dependent epimerase/dehydratase family protein
Chr1	496297	543639	47342	Predicted by at least one method	WP_015875926.1		HJC54_RS15105	518363	519001	-1	CDP-alcohol phosphatidyltransferase family protein
Chr1	496297	543639	47342	Predicted by at least one method	WP_167539761.1		HJC54_RS15110	518998	519777	-1	UDP-2,3-diacylglucosamine diphosphatase
Chr1	496297	543639	47342	Predicted by at least one method	WP_015875924.1		HJC54_RS15115	520181	521611	1	MFS transporter
Chr1	496297	543639	47342	Predicted by at least one method	WP_015875923.1		HJC54_RS15120	521651	524881	1	non-ribosomal peptide synthetase
Chr1	496297	543639	47342	Predicted by at least one method	WP_015875922.1		HJC54_RS15125	524878	525930	1	nucleoside-diphosphate kinase
Chr1	496297	543639	47342	Predicted by at least one method	WP_015875921.1		HJC54_RS15130	525978	526316	1	hypothetical protein
Chr1	496297	543639	47342	Predicted by at least one method	WP_015875920.1		HJC54_RS15135	526375	527433	1	zinc-binding alcohol dehydrogenase
Chr1	496297	543639	47342	Predicted by at least one method	WP_015875919.1		HJC54_RS15140	527623	528327	1	cupin domain-containing protein
Chr1	496297	543639	47342	Predicted by at least one method	WP_015875918.1		HJC54_RS15145	528324	529562	1	Gfo/Idh/MocA family oxidoreductase
Chr1	496297	543639	47342	Predicted by at least one method	WP_015875917.1		HJC54_RS15150	529588	530562	-1	aminoglycoside phosphotransferase family protein
Chr1	496297	543639	47342	Predicted by at least one method	WP_035983864.1		HJC54_RS15155	530679	531851	1	aminotransferase class V-fold PLP-dependent enzyme
Chr1	496297	543639	47342	Predicted by at least one method	WP_015875915.1		HJC54_RS15160	531873	532811	1	nucleoside-diphosphate kinase
Chr1	496297	543639	47342	Predicted by at least one method			HJC54_RS15165	532822	533475	1	IS110 family transposase
Chr1	496297	543639	47342	Predicted by at least one method	WP_169511805.1		HJC54_RS15170	533760	534632	1	gamma-glutamyl-gamma-aminobutyrate hydrolase family protein
Chr1	496297	543639	47342	Predicted by at least one method	WP_017432258.1		HJC54_RS15175	534602	535657	-1	hypothetical protein
Chr1	496297	543639	47342	Predicted by at least one method	WP_169511806.1		HJC54_RS15180	536070	537061	1	IS5 family transposase
Chr1	496297	543639	47342	Predicted by at least one method	WP_169511807.1		HJC54_RS15185	537074	538093	1	hypothetical protein
Chr1	496297	543639	47342	Predicted by at least one method	WP_017433090.1		HJC54_RS15190	538129	538416	1	hypothetical protein
Chr1	496297	543639	47342	Predicted by at least one method	WP_015875911.1		HJC54_RS15195	538463	539629	1	nucleotidyltransferase family protein
Chr1	496297	543639	47342	Predicted by at least one method	WP_158335152.1		HJC54_RS15200	539711	541369	1	acyl--CoA ligase
Chr1	496297	543639	47342	Predicted by at least one method	WP_169511808.1		HJC54_RS15205	541366	543639	1	N,N-dimethylformamidase
Chr1	548939	553608	4669	Predicted by at least one method			HJC54_RS15240	549052	550255	1	IS3 family transposase
Chr1	548939	553608	4669	Predicted by at least one method			HJC54_RS15245	550282	550700	-1	transposase
Chr1	548939	553608	4669	Predicted by at least one method	WP_161521409.1		HJC54_RS15250	551420	552892	1	peptidase S1
Chr1	685376	689573	4197	Predicted by at least one method	WP_169511828.1		HJC54_RS15855	685145	686191	1	LacI family transcriptional regulator
Chr1	685376	689573	4197	Predicted by at least one method	WP_015875789.1		HJC54_RS15860	686309	686506	1	ribbon-helix-helix protein, CopG family
Chr1	685376	689573	4197	Predicted by at least one method	WP_124836825.1		HJC54_RS15865	686532	687368	-1	fused MFS/spermidine synthase
Chr1	685376	689573	4197	Predicted by at least one method	WP_015875787.1		HJC54_RS15870	687396	687740	-1	alkylphosphonate utilization protein
Chr1	685376	689573	4197	Predicted by at least one method	WP_017433257.1		HJC54_RS15875	687951	688208	1	hypothetical protein
Chr1	685376	689573	4197	Predicted by at least one method	WP_042968115.1		HJC54_RS15880	688236	688553	1	hypothetical protein
Chr1	685376	689573	4197	Predicted by at least one method	WP_017433256.1	cfa	HJC54_RS15885	688844	690067	1	cyclopropane fatty acyl phospholipid synthase
Chr1	711033	720444	9411	Predicted by at least one method	WP_161520834.1		HJC54_RS16010	710506	711246	-1	SDR family oxidoreductase
Chr1	711033	720444	9411	Predicted by at least one method	WP_015875706.1		HJC54_RS16015	711243	712412	-1	acyl-CoA dehydrogenase family protein
Chr1	711033	720444	9411	Predicted by at least one method	WP_015875705.1		HJC54_RS16020	712444	713361	-1	diiron oxygenase
Chr1	711033	720444	9411	Predicted by at least one method	WP_015875704.1		HJC54_RS16025	713464	714180	-1	iron-containing redox enzyme family protein
Chr1	711033	720444	9411	Predicted by at least one method	WP_169511836.1		HJC54_RS16030	714187	715236	-1	alpha/beta hydrolase
Chr1	711033	720444	9411	Predicted by at least one method	WP_169511837.1		HJC54_RS16035	715233	716186	-1	hypothetical protein
Chr1	711033	720444	9411	Predicted by at least one method	WP_015875701.1		HJC54_RS16040	716183	717448	-1	beta-ketoacyl synthase
Chr1	711033	720444	9411	Predicted by at least one method	WP_035979702.1		HJC54_RS16045	717445	717747	-1	acyl carrier protein
Chr1	711033	720444	9411	Predicted by at least one method	WP_169511838.1		HJC54_RS16050	717847	719328	-1	MFS transporter
Chr1	711033	720444	9411	Predicted by at least one method	WP_015875699.1		HJC54_RS16055	719344	719679	-1	ferredoxin family protein
Chr1	711033	720444	9411	Predicted by at least one method	WP_124836842.1		HJC54_RS16060	719806	720918	-1	peptidase C45
Chr1	720515	727838	7323	Predicted by at least one method	WP_124836842.1		HJC54_RS16060	719806	720918	-1	peptidase C45
Chr1	720515	727838	7323	Predicted by at least one method	WP_015875697.1		HJC54_RS16065	720893	721480	-1	GNAT family N-acetyltransferase
Chr1	720515	727838	7323	Predicted by at least one method	WP_015875696.1		HJC54_RS16070	721497	721754	-1	hypothetical protein
Chr1	720515	727838	7323	Predicted by at least one method	WP_015875695.1		HJC54_RS16075	721751	723310	-1	AMP-binding protein
Chr1	720515	727838	7323	Predicted by at least one method	WP_015875694.1		HJC54_RS16080	723310	725175	-1	hypothetical protein
Chr1	720515	727838	7323	Predicted by at least one method	WP_015875693.1		HJC54_RS16085	725471	726184	-1	autoinducer binding domain-containing protein
Chr1	720515	727838	7323	Predicted by at least one method	WP_157384143.1		HJC54_RS16090	726554	726898	1	hypothetical protein
Chr1	720515	727838	7323	Predicted by at least one method	WP_153477561.1		HJC54_RS16095	727095	727265	-1	hypothetical protein
Chr1	720515	727838	7323	Predicted by at least one method	WP_161520839.1		HJC54_RS16100	727506	728723	1	alpha/beta hydrolase
Chr1	814125	820046	5921	Predicted by at least one method	WP_017432881.1		HJC54_RS16445	815535	815783	-1	hypothetical protein
Chr1	814125	820046	5921	Predicted by at least one method			HJC54_RS16450	816357	817374	-1	IS110 family transposase
Chr1	814125	820046	5921	Predicted by at least one method	WP_085962451.1		HJC54_RS16455	817576	818393	1	IS5 family transposase
Chr1	814125	820046	5921	Predicted by at least one method	WP_017922172.1		HJC54_RS16460	818607	819545	-1	NADP-dependent oxidoreductase
Chr1	814125	820046	5921	Predicted by at least one method	WP_015875547.1		HJC54_RS16465	819892	821028	1	glutathione-independent formaldehyde dehydrogenase
Chr1	820379	824910	4531	Predicted by at least one method	WP_015875547.1		HJC54_RS16465	819892	821028	1	glutathione-independent formaldehyde dehydrogenase
Chr1	820379	824910	4531	Predicted by at least one method	WP_015875546.1		HJC54_RS16470	821150	822052	1	SDR family oxidoreductase
Chr1	820379	824910	4531	Predicted by at least one method			HJC54_RS16475	822049	822804	1	PIG-L family deacetylase
Chr1	820379	824910	4531	Predicted by at least one method	WP_169511851.1		HJC54_RS16480	822845	823828	1	glycosyltransferase
Chr1	820379	824910	4531	Predicted by at least one method	WP_169511852.1		HJC54_RS16485	823818	826487	-1	ATP-binding cassette domain-containing protein
Chr1	856862	861666	4804	Predicted by at least one method	WP_015875519.1		HJC54_RS16610	856128	856874	-1	glucose 1-dehydrogenase
Chr1	856862	861666	4804	Predicted by at least one method	WP_017433095.1		HJC54_RS16615	857287	857496	-1	hypothetical protein
Chr1	856862	861666	4804	Predicted by at least one method	WP_153477426.1		HJC54_RS16620	857799	858233	1	hypothetical protein
Chr1	856862	861666	4804	Predicted by at least one method	WP_169511861.1		HJC54_RS16625	858325	860172	1	hypothetical protein
Chr1	856862	861666	4804	Predicted by at least one method	WP_017923574.1		HJC54_RS16630	860237	860647	1	hypothetical protein
Chr1	856862	861666	4804	Predicted by at least one method	WP_169511863.1		HJC54_RS16635	860821	861891	1	SDR family oxidoreductase
Chr1	1161242	1213124	51882	Predicted by at least one method	WP_159372690.1		HJC54_RS17970	1161242	1162059	1	IS5-like element ISBugl2 family transposase
Chr1	1161242	1213124	51882	Predicted by at least one method			HJC54_RS17975	1162363	1162500	-1	IS3 family transposase
Chr1	1161242	1213124	51882	Predicted by at least one method	WP_169511923.1		HJC54_RS17980	1162812	1163243	-1	helix-turn-helix domain-containing protein
Chr1	1161242	1213124	51882	Predicted by at least one method	WP_169511924.1		HJC54_RS17985	1163318	1164175	1	class I SAM-dependent methyltransferase
Chr1	1161242	1213124	51882	Predicted by at least one method	WP_169511925.1		HJC54_RS17990	1164400	1164651	1	hypothetical protein
Chr1	1161242	1213124	51882	Predicted by at least one method	WP_081066104.1		HJC54_RS17995	1164827	1165456	1	ankyrin repeat domain-containing protein
Chr1	1161242	1213124	51882	Predicted by at least one method	WP_169511926.1		HJC54_RS18000	1165638	1166111	-1	helix-turn-helix domain-containing protein
Chr1	1161242	1213124	51882	Predicted by at least one method	WP_169511927.1		HJC54_RS18005	1167108	1167419	1	hypothetical protein
Chr1	1161242	1213124	51882	Predicted by at least one method	WP_059694742.1		HJC54_RS18010	1167477	1167695	-1	helix-turn-helix domain-containing protein
Chr1	1161242	1213124	51882	Predicted by at least one method	WP_169511928.1		HJC54_RS18015	1167782	1168504	1	hypothetical protein
Chr1	1161242	1213124	51882	Predicted by at least one method	WP_196488364.1		HJC54_RS29440	1168616	1169110	1	hypothetical protein
Chr1	1161242	1213124	51882	Predicted by at least one method	WP_155633680.1		HJC54_RS18025	1169351	1169620	1	hypothetical protein
Chr1	1161242	1213124	51882	Predicted by at least one method	WP_169511929.1		HJC54_RS18030	1169823	1170431	-1	hypothetical protein
Chr1	1161242	1213124	51882	Predicted by at least one method	WP_155638840.1		HJC54_RS18035	1170440	1170739	-1	hypothetical protein
Chr1	1161242	1213124	51882	Predicted by at least one method	WP_211437540.1		HJC54_RS29445	1170839	1171768	-1	hypothetical protein
Chr1	1161242	1213124	51882	Predicted by at least one method			HJC54_RS18045	1171924	1173127	1	IS3 family transposase
Chr1	1161242	1213124	51882	Predicted by at least one method	WP_169511171.1		HJC54_RS18050	1173363	1174409	1	IS481 family transposase
Chr1	1161242	1213124	51882	Predicted by at least one method	WP_169511930.1		HJC54_RS18055	1174354	1176222	-1	DotA/TraY family protein
Chr1	1161242	1213124	51882	Predicted by at least one method	WP_169511931.1		HJC54_RS18060	1176468	1177295	-1	HNH endonuclease
Chr1	1161242	1213124	51882	Predicted by at least one method	WP_059699070.1		HJC54_RS18065	1177607	1178530	-1	hypothetical protein
Chr1	1161242	1213124	51882	Predicted by at least one method	WP_059699072.1		HJC54_RS18070	1178793	1179263	-1	hypothetical protein
Chr1	1161242	1213124	51882	Predicted by at least one method	WP_169511932.1		HJC54_RS18075	1179409	1181274	-1	AAA family ATPase
Chr1	1161242	1213124	51882	Predicted by at least one method	WP_169511933.1		HJC54_RS18080	1181365	1182498	-1	relaxase domain-containing protein
Chr1	1161242	1213124	51882	Predicted by at least one method	WP_059699076.1		HJC54_RS18085	1182495	1182821	-1	hypothetical protein
Chr1	1161242	1213124	51882	Predicted by at least one method	WP_169511934.1		HJC54_RS18090	1183210	1183521	1	hypothetical protein
Chr1	1161242	1213124	51882	Predicted by at least one method	WP_169511935.1		HJC54_RS18095	1183620	1184180	1	hypothetical protein
Chr1	1161242	1213124	51882	Predicted by at least one method	WP_169511936.1		HJC54_RS18100	1184177	1184623	1	hypothetical protein
Chr1	1161242	1213124	51882	Predicted by at least one method	WP_169511937.1		HJC54_RS18105	1184700	1185329	-1	hypothetical protein
Chr1	1161242	1213124	51882	Predicted by at least one method	WP_169511938.1		HJC54_RS18110	1185351	1185965	-1	hypothetical protein
Chr1	1161242	1213124	51882	Predicted by at least one method	WP_211437541.1		HJC54_RS18115	1185974	1186897	-1	tyrosine-type recombinase/integrase
Chr1	1161242	1213124	51882	Predicted by at least one method	WP_169511940.1		HJC54_RS18120	1186894	1187583	-1	hypothetical protein
Chr1	1161242	1213124	51882	Predicted by at least one method	WP_169512451.1		HJC54_RS18125	1187865	1188173	-1	hypothetical protein
Chr1	1161242	1213124	51882	Predicted by at least one method	WP_169511941.1		HJC54_RS18130	1188396	1188596	-1	hypothetical protein
Chr1	1161242	1213124	51882	Predicted by at least one method	WP_169511942.1		HJC54_RS18135	1188703	1189005	1	H-NS histone family protein
Chr1	1161242	1213124	51882	Predicted by at least one method	WP_169511943.1		HJC54_RS18140	1189225	1191021	1	AIPR family protein
Chr1	1161242	1213124	51882	Predicted by at least one method	WP_169511944.1		HJC54_RS18145	1191374	1192003	1	ankyrin repeat domain-containing protein
Chr1	1161242	1213124	51882	Predicted by at least one method	WP_169511945.1		HJC54_RS18150	1192308	1192970	1	replication initiation protein
Chr1	1161242	1213124	51882	Predicted by at least one method	WP_169511946.1		HJC54_RS18155	1192957	1193286	1	hypothetical protein
Chr1	1161242	1213124	51882	Predicted by at least one method	WP_169511947.1		HJC54_RS18160	1193520	1194041	1	HNH endonuclease
Chr1	1161242	1213124	51882	Predicted by at least one method	WP_169511948.1		HJC54_RS18165	1194028	1194723	1	hypothetical protein
Chr1	1161242	1213124	51882	Predicted by at least one method	WP_169511949.1		HJC54_RS18170	1195113	1195256	-1	hypothetical protein
Chr1	1161242	1213124	51882	Predicted by at least one method	WP_169511950.1		HJC54_RS18175	1195306	1195824	1	hypothetical protein
Chr1	1161242	1213124	51882	Predicted by at least one method	WP_169511951.1		HJC54_RS18180	1195873	1196403	-1	GNAT family N-acetyltransferase
Chr1	1161242	1213124	51882	Predicted by at least one method	WP_169511952.1		HJC54_RS18185	1196669	1196923	-1	helix-turn-helix domain-containing protein
Chr1	1161242	1213124	51882	Predicted by at least one method	WP_169511953.1		HJC54_RS18190	1197120	1197761	1	hypothetical protein
Chr1	1161242	1213124	51882	Predicted by at least one method	WP_169511691.1	istB	HJC54_RS18195	1197828	1198577	-1	IS21-like element helper ATPase IstB
Chr1	1161242	1213124	51882	Predicted by at least one method		istA	HJC54_RS18200	1198617	1200120	-1	IS21 family transposase
Chr1	1161242	1213124	51882	Predicted by at least one method	WP_169511954.1		HJC54_RS18205	1200374	1200796	1	hypothetical protein
Chr1	1161242	1213124	51882	Predicted by at least one method	WP_169511955.1		HJC54_RS18210	1200907	1203018	-1	DEAD/DEAH box helicase
Chr1	1161242	1213124	51882	Predicted by at least one method	WP_169512452.1		HJC54_RS18215	1203009	1203848	-1	DUF1837 domain-containing protein
Chr1	1161242	1213124	51882	Predicted by at least one method			HJC54_RS18220	1204460	1205505	-1	IS481 family transposase
Chr1	1161242	1213124	51882	Predicted by at least one method	WP_169511956.1		HJC54_RS18225	1205597	1208146	-1	AAA family ATPase
Chr1	1161242	1213124	51882	Predicted by at least one method			HJC54_RS18230	1208367	1209412	1	IS481 family transposase
Chr1	1161242	1213124	51882	Predicted by at least one method	WP_169511957.1		HJC54_RS18235	1209461	1209913	-1	hypothetical protein
Chr1	1161242	1213124	51882	Predicted by at least one method	WP_169511958.1		HJC54_RS18240	1209910	1210236	-1	hypothetical protein
Chr1	1161242	1213124	51882	Predicted by at least one method	WP_169511959.1		HJC54_RS18245	1210595	1210978	1	hypothetical protein
Chr1	1161242	1213124	51882	Predicted by at least one method	WP_169511960.1		HJC54_RS18250	1211011	1211493	1	ankyrin repeat domain-containing protein
Chr1	1161242	1213124	51882	Predicted by at least one method	WP_169511961.1		HJC54_RS18255	1211529	1213124	-1	site-specific integrase
Chr1	1167643	1171831	4188	Predicted by at least one method	WP_059694742.1		HJC54_RS18010	1167477	1167695	-1	helix-turn-helix domain-containing protein
Chr1	1167643	1171831	4188	Predicted by at least one method	WP_169511928.1		HJC54_RS18015	1167782	1168504	1	hypothetical protein
Chr1	1167643	1171831	4188	Predicted by at least one method	WP_196488364.1		HJC54_RS29440	1168616	1169110	1	hypothetical protein
Chr1	1167643	1171831	4188	Predicted by at least one method	WP_155633680.1		HJC54_RS18025	1169351	1169620	1	hypothetical protein
Chr1	1167643	1171831	4188	Predicted by at least one method	WP_169511929.1		HJC54_RS18030	1169823	1170431	-1	hypothetical protein
Chr1	1167643	1171831	4188	Predicted by at least one method	WP_155638840.1		HJC54_RS18035	1170440	1170739	-1	hypothetical protein
Chr1	1167643	1171831	4188	Predicted by at least one method	WP_211437540.1		HJC54_RS29445	1170839	1171768	-1	hypothetical protein
Chr1	1174472	1213228	38756	Predicted by at least one method	WP_169511930.1		HJC54_RS18055	1174354	1176222	-1	DotA/TraY family protein
Chr1	1174472	1213228	38756	Predicted by at least one method	WP_169511931.1		HJC54_RS18060	1176468	1177295	-1	HNH endonuclease
Chr1	1174472	1213228	38756	Predicted by at least one method	WP_059699070.1		HJC54_RS18065	1177607	1178530	-1	hypothetical protein
Chr1	1174472	1213228	38756	Predicted by at least one method	WP_059699072.1		HJC54_RS18070	1178793	1179263	-1	hypothetical protein
Chr1	1174472	1213228	38756	Predicted by at least one method	WP_169511932.1		HJC54_RS18075	1179409	1181274	-1	AAA family ATPase
Chr1	1174472	1213228	38756	Predicted by at least one method	WP_169511933.1		HJC54_RS18080	1181365	1182498	-1	relaxase domain-containing protein
Chr1	1174472	1213228	38756	Predicted by at least one method	WP_059699076.1		HJC54_RS18085	1182495	1182821	-1	hypothetical protein
Chr1	1174472	1213228	38756	Predicted by at least one method	WP_169511934.1		HJC54_RS18090	1183210	1183521	1	hypothetical protein
Chr1	1174472	1213228	38756	Predicted by at least one method	WP_169511935.1		HJC54_RS18095	1183620	1184180	1	hypothetical protein
Chr1	1174472	1213228	38756	Predicted by at least one method	WP_169511936.1		HJC54_RS18100	1184177	1184623	1	hypothetical protein
Chr1	1174472	1213228	38756	Predicted by at least one method	WP_169511937.1		HJC54_RS18105	1184700	1185329	-1	hypothetical protein
Chr1	1174472	1213228	38756	Predicted by at least one method	WP_169511938.1		HJC54_RS18110	1185351	1185965	-1	hypothetical protein
Chr1	1174472	1213228	38756	Predicted by at least one method	WP_211437541.1		HJC54_RS18115	1185974	1186897	-1	tyrosine-type recombinase/integrase
Chr1	1174472	1213228	38756	Predicted by at least one method	WP_169511940.1		HJC54_RS18120	1186894	1187583	-1	hypothetical protein
Chr1	1174472	1213228	38756	Predicted by at least one method	WP_169512451.1		HJC54_RS18125	1187865	1188173	-1	hypothetical protein
Chr1	1174472	1213228	38756	Predicted by at least one method	WP_169511941.1		HJC54_RS18130	1188396	1188596	-1	hypothetical protein
Chr1	1174472	1213228	38756	Predicted by at least one method	WP_169511942.1		HJC54_RS18135	1188703	1189005	1	H-NS histone family protein
Chr1	1174472	1213228	38756	Predicted by at least one method	WP_169511943.1		HJC54_RS18140	1189225	1191021	1	AIPR family protein
Chr1	1174472	1213228	38756	Predicted by at least one method	WP_169511944.1		HJC54_RS18145	1191374	1192003	1	ankyrin repeat domain-containing protein
Chr1	1174472	1213228	38756	Predicted by at least one method	WP_169511945.1		HJC54_RS18150	1192308	1192970	1	replication initiation protein
Chr1	1174472	1213228	38756	Predicted by at least one method	WP_169511946.1		HJC54_RS18155	1192957	1193286	1	hypothetical protein
Chr1	1174472	1213228	38756	Predicted by at least one method	WP_169511947.1		HJC54_RS18160	1193520	1194041	1	HNH endonuclease
Chr1	1174472	1213228	38756	Predicted by at least one method	WP_169511948.1		HJC54_RS18165	1194028	1194723	1	hypothetical protein
Chr1	1174472	1213228	38756	Predicted by at least one method	WP_169511949.1		HJC54_RS18170	1195113	1195256	-1	hypothetical protein
Chr1	1174472	1213228	38756	Predicted by at least one method	WP_169511950.1		HJC54_RS18175	1195306	1195824	1	hypothetical protein
Chr1	1174472	1213228	38756	Predicted by at least one method	WP_169511951.1		HJC54_RS18180	1195873	1196403	-1	GNAT family N-acetyltransferase
Chr1	1174472	1213228	38756	Predicted by at least one method	WP_169511952.1		HJC54_RS18185	1196669	1196923	-1	helix-turn-helix domain-containing protein
Chr1	1174472	1213228	38756	Predicted by at least one method	WP_169511953.1		HJC54_RS18190	1197120	1197761	1	hypothetical protein
Chr1	1174472	1213228	38756	Predicted by at least one method	WP_169511691.1	istB	HJC54_RS18195	1197828	1198577	-1	IS21-like element helper ATPase IstB
Chr1	1174472	1213228	38756	Predicted by at least one method		istA	HJC54_RS18200	1198617	1200120	-1	IS21 family transposase
Chr1	1174472	1213228	38756	Predicted by at least one method	WP_169511954.1		HJC54_RS18205	1200374	1200796	1	hypothetical protein
Chr1	1174472	1213228	38756	Predicted by at least one method	WP_169511955.1		HJC54_RS18210	1200907	1203018	-1	DEAD/DEAH box helicase
Chr1	1174472	1213228	38756	Predicted by at least one method	WP_169512452.1		HJC54_RS18215	1203009	1203848	-1	DUF1837 domain-containing protein
Chr1	1174472	1213228	38756	Predicted by at least one method			HJC54_RS18220	1204460	1205505	-1	IS481 family transposase
Chr1	1174472	1213228	38756	Predicted by at least one method	WP_169511956.1		HJC54_RS18225	1205597	1208146	-1	AAA family ATPase
Chr1	1174472	1213228	38756	Predicted by at least one method			HJC54_RS18230	1208367	1209412	1	IS481 family transposase
Chr1	1174472	1213228	38756	Predicted by at least one method	WP_169511957.1		HJC54_RS18235	1209461	1209913	-1	hypothetical protein
Chr1	1174472	1213228	38756	Predicted by at least one method	WP_169511958.1		HJC54_RS18240	1209910	1210236	-1	hypothetical protein
Chr1	1174472	1213228	38756	Predicted by at least one method	WP_169511959.1		HJC54_RS18245	1210595	1210978	1	hypothetical protein
Chr1	1174472	1213228	38756	Predicted by at least one method	WP_169511960.1		HJC54_RS18250	1211011	1211493	1	ankyrin repeat domain-containing protein
Chr1	1174472	1213228	38756	Predicted by at least one method	WP_169511961.1		HJC54_RS18255	1211529	1213124	-1	site-specific integrase
Chr1	1556879	1584154	27275	Predicted by at least one method	WP_169512018.1		HJC54_RS19765	1556879	1557664	-1	DNA adenine methylase
Chr1	1556879	1584154	27275	Predicted by at least one method	WP_169512019.1		HJC54_RS19770	1557952	1558599	-1	hypothetical protein
Chr1	1556879	1584154	27275	Predicted by at least one method	WP_169512020.1		HJC54_RS19775	1558596	1559162	-1	hypothetical protein
Chr1	1556879	1584154	27275	Predicted by at least one method	WP_169512021.1		HJC54_RS19780	1559159	1559608	-1	hypothetical protein
Chr1	1556879	1584154	27275	Predicted by at least one method	WP_169512022.1		HJC54_RS19785	1559681	1560730	-1	late control protein
Chr1	1556879	1584154	27275	Predicted by at least one method	WP_169512023.1		HJC54_RS19790	1560740	1560946	-1	tail protein X
Chr1	1556879	1584154	27275	Predicted by at least one method	WP_169512024.1		HJC54_RS19795	1560921	1561799	-1	phage tail protein
Chr1	1556879	1584154	27275	Predicted by at least one method	WP_169512025.1		HJC54_RS19800	1561810	1564251	-1	phage tail tape measure protein
Chr1	1556879	1584154	27275	Predicted by at least one method	WP_059554165.1		HJC54_RS19805	1564332	1564634	-1	phage tail assembly protein
Chr1	1556879	1584154	27275	Predicted by at least one method	WP_169512026.1		HJC54_RS19810	1564731	1565234	-1	phage major tail tube protein
Chr1	1556879	1584154	27275	Predicted by at least one method	WP_169512027.1		HJC54_RS19815	1565245	1566414	-1	phage tail sheath family protein
Chr1	1556879	1584154	27275	Predicted by at least one method	WP_169512028.1		HJC54_RS19820	1566499	1567278	-1	tail fiber assembly protein
Chr1	1556879	1584154	27275	Predicted by at least one method	WP_169512029.1		HJC54_RS19825	1567294	1569282	-1	phage tail protein
Chr1	1556879	1584154	27275	Predicted by at least one method	WP_169512030.1		HJC54_RS19830	1569270	1569848	-1	phage tail protein I
Chr1	1556879	1584154	27275	Predicted by at least one method	WP_169512031.1		HJC54_RS19835	1569838	1570734	-1	baseplate J/gp47 family protein
Chr1	1556879	1584154	27275	Predicted by at least one method	WP_169512032.1		HJC54_RS19840	1570731	1571066	-1	GPW/gp25 family protein
Chr1	1556879	1584154	27275	Predicted by at least one method	WP_169512033.1		HJC54_RS19845	1571066	1571266	-1	hypothetical protein
Chr1	1556879	1584154	27275	Predicted by at least one method	WP_169512034.1		HJC54_RS19850	1571327	1572007	-1	phage baseplate assembly protein V
Chr1	1556879	1584154	27275	Predicted by at least one method	WP_169512035.1		HJC54_RS19855	1572011	1572535	-1	hypothetical protein
Chr1	1556879	1584154	27275	Predicted by at least one method	WP_169512036.1		HJC54_RS19860	1572525	1573055	-1	phage tail protein
Chr1	1556879	1584154	27275	Predicted by at least one method	WP_169512037.1		HJC54_RS19865	1573059	1573349	-1	hypothetical protein
Chr1	1556879	1584154	27275	Predicted by at least one method	WP_169512038.1		HJC54_RS19870	1573351	1574346	-1	major capsid protein
Chr1	1556879	1584154	27275	Predicted by at least one method	WP_169512039.1		HJC54_RS19875	1574420	1574764	-1	head decoration protein
Chr1	1556879	1584154	27275	Predicted by at least one method	WP_169512040.1		HJC54_RS19880	1574795	1575895	-1	Clp protease ClpP
Chr1	1556879	1584154	27275	Predicted by at least one method	WP_169512041.1		HJC54_RS19885	1575892	1577385	-1	phage portal protein
Chr1	1556879	1584154	27275	Predicted by at least one method	WP_048248427.1		HJC54_RS19890	1577382	1577588	-1	hypothetical protein
Chr1	1556879	1584154	27275	Predicted by at least one method	WP_169512457.1		HJC54_RS19895	1577602	1579587	-1	phage terminase large subunit family protein
Chr1	1556879	1584154	27275	Predicted by at least one method	WP_169512042.1		HJC54_RS19900	1579589	1580119	-1	MarR family transcriptional regulator
Chr1	1556879	1584154	27275	Predicted by at least one method	WP_006497117.1		HJC54_RS19905	1580211	1580405	-1	hypothetical protein
Chr1	1556879	1584154	27275	Predicted by at least one method	WP_169512043.1		HJC54_RS19910	1580653	1581426	-1	hypothetical protein
Chr1	1556879	1584154	27275	Predicted by at least one method	WP_169512044.1		HJC54_RS19915	1581647	1584154	-1	virulence protein E
Chr1	1616502	1621039	4537	Predicted by at least one method	WP_169512075.1		HJC54_RS20125	1616237	1616653	-1	hypothetical protein
Chr1	1616502	1621039	4537	Predicted by at least one method	WP_169512076.1		HJC54_RS20130	1616805	1617116	1	hypothetical protein
Chr1	1616502	1621039	4537	Predicted by at least one method	WP_169512077.1		HJC54_RS20135	1617171	1618970	-1	toprim domain-containing protein
Chr1	1616502	1621039	4537	Predicted by at least one method	WP_169512078.1		HJC54_RS20140	1618967	1619944	-1	replication protein
Chr1	1616502	1621039	4537	Predicted by at least one method	WP_169512079.1		HJC54_RS20145	1619998	1620318	-1	hypothetical protein
Chr1	1616502	1621039	4537	Predicted by at least one method	WP_169512080.1		HJC54_RS20150	1620588	1620818	-1	hypothetical protein
Chr1	1616502	1621039	4537	Predicted by at least one method	WP_169512461.1		HJC54_RS20155	1620825	1621031	-1	transcriptional regulator
Chr1	1616805	1643285	26480	Predicted by at least one method	WP_169512076.1		HJC54_RS20130	1616805	1617116	1	hypothetical protein
Chr1	1616805	1643285	26480	Predicted by at least one method	WP_169512077.1		HJC54_RS20135	1617171	1618970	-1	toprim domain-containing protein
Chr1	1616805	1643285	26480	Predicted by at least one method	WP_169512078.1		HJC54_RS20140	1618967	1619944	-1	replication protein
Chr1	1616805	1643285	26480	Predicted by at least one method	WP_169512079.1		HJC54_RS20145	1619998	1620318	-1	hypothetical protein
Chr1	1616805	1643285	26480	Predicted by at least one method	WP_169512080.1		HJC54_RS20150	1620588	1620818	-1	hypothetical protein
Chr1	1616805	1643285	26480	Predicted by at least one method	WP_169512461.1		HJC54_RS20155	1620825	1621031	-1	transcriptional regulator
Chr1	1616805	1643285	26480	Predicted by at least one method	WP_169512462.1		HJC54_RS20160	1621127	1621306	-1	helix-turn-helix domain-containing protein
Chr1	1616805	1643285	26480	Predicted by at least one method	WP_169512081.1		HJC54_RS20165	1621470	1622045	1	hypothetical protein
Chr1	1616805	1643285	26480	Predicted by at least one method	WP_169512082.1		HJC54_RS20170	1622093	1622452	-1	hypothetical protein
Chr1	1616805	1643285	26480	Predicted by at least one method	WP_169512083.1		HJC54_RS20175	1622445	1622777	-1	hypothetical protein
Chr1	1616805	1643285	26480	Predicted by at least one method	WP_169512084.1		HJC54_RS20180	1622770	1623132	-1	hypothetical protein
Chr1	1616805	1643285	26480	Predicted by at least one method	WP_211437542.1		HJC54_RS20185	1623510	1624115	1	hypothetical protein
Chr1	1616805	1643285	26480	Predicted by at least one method	WP_169512085.1		HJC54_RS20190	1624394	1624978	1	hypothetical protein
Chr1	1616805	1643285	26480	Predicted by at least one method	WP_124837761.1		HJC54_RS20195	1625130	1625324	-1	type II toxin-antitoxin system HicA family toxin
Chr1	1616805	1643285	26480	Predicted by at least one method	WP_017922831.1		HJC54_RS20200	1625325	1625558	-1	DUF1902 domain-containing protein
Chr1	1616805	1643285	26480	Predicted by at least one method	WP_169512086.1		HJC54_RS20205	1625693	1625932	-1	hypothetical protein
Chr1	1616805	1643285	26480	Predicted by at least one method	WP_169512087.1		HJC54_RS20210	1626106	1626339	-1	hypothetical protein
Chr1	1616805	1643285	26480	Predicted by at least one method	WP_124837732.1		HJC54_RS20215	1626354	1627591	-1	IS3 family transposase
Chr1	1616805	1643285	26480	Predicted by at least one method	WP_017425499.1		HJC54_RS20220	1627790	1627972	-1	hypothetical protein
Chr1	1616805	1643285	26480	Predicted by at least one method	WP_017922833.1		HJC54_RS20225	1628107	1628883	-1	DUF1828 domain-containing protein
Chr1	1616805	1643285	26480	Predicted by at least one method	WP_043225285.1		HJC54_RS20230	1628880	1629335	-1	hypothetical protein
Chr1	1616805	1643285	26480	Predicted by at least one method			HJC54_RS20235	1630021	1630418	1	tyrosine-type recombinase/integrase
Chr1	1616805	1643285	26480	Predicted by at least one method	WP_169512464.1		HJC54_RS20240	1630929	1631768	1	hypothetical protein
Chr1	1616805	1643285	26480	Predicted by at least one method	WP_169512088.1		HJC54_RS20245	1631772	1632065	1	hypothetical protein
Chr1	1616805	1643285	26480	Predicted by at least one method	WP_158335149.1		HJC54_RS20250	1632175	1632372	1	DUF2778 domain-containing protein
Chr1	1616805	1643285	26480	Predicted by at least one method			HJC54_RS20255	1632406	1633449	1	IS3 family transposase
Chr1	1616805	1643285	26480	Predicted by at least one method	WP_017433129.1		HJC54_RS20260	1634045	1635655	1	hypothetical protein
Chr1	1616805	1643285	26480	Predicted by at least one method	WP_015876683.1		HJC54_RS20265	1636083	1637741	1	ABC transporter substrate-binding protein
Chr1	1616805	1643285	26480	Predicted by at least one method	WP_169512465.1		HJC54_RS20270	1637839	1638189	-1	hypothetical protein
Chr1	1616805	1643285	26480	Predicted by at least one method	WP_017433131.1		HJC54_RS20275	1638498	1638878	-1	DUF3592 domain-containing protein
Chr1	1616805	1643285	26480	Predicted by at least one method	WP_017425492.1		HJC54_RS20280	1638992	1639261	1	hypothetical protein
Chr1	1616805	1643285	26480	Predicted by at least one method	WP_015876685.1		HJC54_RS20285	1639383	1639592	1	hypothetical protein
Chr1	1616805	1643285	26480	Predicted by at least one method	WP_169512089.1		HJC54_RS20290	1639747	1640877	1	serine hydrolase
Chr1	1616805	1643285	26480	Predicted by at least one method	WP_169512090.1	eco	HJC54_RS20295	1640915	1641454	-1	serine protease inhibitor ecotin
Chr1	1616805	1643285	26480	Predicted by at least one method	WP_169512091.1		HJC54_RS20300	1641699	1642109	1	hypothetical protein
Chr1	1616805	1643285	26480	Predicted by at least one method	WP_035981820.1		HJC54_RS20305	1642361	1642708	-1	hypothetical protein
Chr1	1616805	1643285	26480	Predicted by at least one method	WP_100556607.1		HJC54_RS20310	1642905	1643285	1	DUF5594 family protein
Chr1	1621104	1629676	8572	Predicted by at least one method	WP_169512462.1		HJC54_RS20160	1621127	1621306	-1	helix-turn-helix domain-containing protein
Chr1	1621104	1629676	8572	Predicted by at least one method	WP_169512081.1		HJC54_RS20165	1621470	1622045	1	hypothetical protein
Chr1	1621104	1629676	8572	Predicted by at least one method	WP_169512082.1		HJC54_RS20170	1622093	1622452	-1	hypothetical protein
Chr1	1621104	1629676	8572	Predicted by at least one method	WP_169512083.1		HJC54_RS20175	1622445	1622777	-1	hypothetical protein
Chr1	1621104	1629676	8572	Predicted by at least one method	WP_169512084.1		HJC54_RS20180	1622770	1623132	-1	hypothetical protein
Chr1	1621104	1629676	8572	Predicted by at least one method	WP_211437542.1		HJC54_RS20185	1623510	1624115	1	hypothetical protein
Chr1	1621104	1629676	8572	Predicted by at least one method	WP_169512085.1		HJC54_RS20190	1624394	1624978	1	hypothetical protein
Chr1	1621104	1629676	8572	Predicted by at least one method	WP_124837761.1		HJC54_RS20195	1625130	1625324	-1	type II toxin-antitoxin system HicA family toxin
Chr1	1621104	1629676	8572	Predicted by at least one method	WP_017922831.1		HJC54_RS20200	1625325	1625558	-1	DUF1902 domain-containing protein
Chr1	1621104	1629676	8572	Predicted by at least one method	WP_169512086.1		HJC54_RS20205	1625693	1625932	-1	hypothetical protein
Chr1	1621104	1629676	8572	Predicted by at least one method	WP_169512087.1		HJC54_RS20210	1626106	1626339	-1	hypothetical protein
Chr1	1621104	1629676	8572	Predicted by at least one method	WP_124837732.1		HJC54_RS20215	1626354	1627591	-1	IS3 family transposase
Chr1	1621104	1629676	8572	Predicted by at least one method	WP_017425499.1		HJC54_RS20220	1627790	1627972	-1	hypothetical protein
Chr1	1621104	1629676	8572	Predicted by at least one method	WP_017922833.1		HJC54_RS20225	1628107	1628883	-1	DUF1828 domain-containing protein
Chr1	1621104	1629676	8572	Predicted by at least one method	WP_043225285.1		HJC54_RS20230	1628880	1629335	-1	hypothetical protein
Chr1	1737087	1746090	9003	Predicted by at least one method	WP_009962292.1		HJC54_RS20730	1736882	1737094	-1	hypothetical protein
Chr1	1737087	1746090	9003	Predicted by at least one method	WP_015876770.1		HJC54_RS20735	1737087	1737389	-1	hypothetical protein
Chr1	1737087	1746090	9003	Predicted by at least one method	WP_015876771.1		HJC54_RS20740	1737382	1737558	-1	hypothetical protein
Chr1	1737087	1746090	9003	Predicted by at least one method	WP_169512108.1		HJC54_RS20745	1737889	1738413	-1	hypothetical protein
Chr1	1737087	1746090	9003	Predicted by at least one method	WP_013699107.1		HJC54_RS20750	1738410	1738601	-1	AlpA family phage regulatory protein
Chr1	1737087	1746090	9003	Predicted by at least one method	WP_169512109.1		HJC54_RS20755	1739199	1741301	1	AAA family ATPase
Chr1	1737087	1746090	9003	Predicted by at least one method	WP_169512110.1		HJC54_RS20760	1741631	1742302	-1	DUF2971 domain-containing protein
Chr1	1737087	1746090	9003	Predicted by at least one method	WP_015876775.1		HJC54_RS20765	1742705	1743280	1	recombinase family protein
Chr1	1737087	1746090	9003	Predicted by at least one method	WP_080763591.1		HJC54_RS20770	1743704	1744177	1	GNAT family N-acetyltransferase
Chr1	1737087	1746090	9003	Predicted by at least one method	WP_015876776.1		HJC54_RS20775	1745027	1745746	1	16S rRNA pseudouridine(516) synthase
Chr1	1737087	1746090	9003	Predicted by at least one method	WP_017423671.1		HJC54_RS20780	1745905	1746090	1	hypothetical protein
Chr1	1737087	1746090	9003	Predicted by at least one method	WP_169512111.1		HJC54_RS20785	1746083	1747129	-1	NAD-binding protein
Chr1	1738388	1742574	4186	Predicted by at least one method	WP_169512108.1		HJC54_RS20745	1737889	1738413	-1	hypothetical protein
Chr1	1738388	1742574	4186	Predicted by at least one method	WP_013699107.1		HJC54_RS20750	1738410	1738601	-1	AlpA family phage regulatory protein
Chr1	1738388	1742574	4186	Predicted by at least one method	WP_169512109.1		HJC54_RS20755	1739199	1741301	1	AAA family ATPase
Chr1	1738388	1742574	4186	Predicted by at least one method	WP_169512110.1		HJC54_RS20760	1741631	1742302	-1	DUF2971 domain-containing protein
Chr1	2013990	2020018	6028	Predicted by at least one method			HJC54_RS21960	2013990	2018000	-1	FAD/FMN-binding oxidoreductase
Chr1	2013990	2020018	6028	Predicted by at least one method		ilvA	HJC54_RS21965	2018496	2020018	1	threonine ammonia-lyase, biosynthetic
Chr1	2205227	2210474	5247	Predicted by at least one method			HJC54_RS22840	2205227	2210474	-1	hemagglutinin repeat-containing protein
Chr1	2246806	2252770	5964	Predicted by at least one method	WP_169512195.1		HJC54_RS23005	2247276	2248319	-1	hypothetical protein
Chr1	2246806	2252770	5964	Predicted by at least one method	WP_169511691.1	istB	HJC54_RS23010	2248803	2249552	-1	IS21-like element helper ATPase IstB
Chr1	2246806	2252770	5964	Predicted by at least one method		istA	HJC54_RS23015	2249592	2251095	-1	IS21 family transposase
Chr1	2246806	2252770	5964	Predicted by at least one method	WP_169512196.1		HJC54_RS23020	2251443	2251778	1	hypothetical protein
Chr1	2246806	2252770	5964	Predicted by at least one method	WP_060040630.1		HJC54_RS23025	2251762	2251962	1	hypothetical protein
Chr1	2247276	2262539	15263	Predicted by at least one method	WP_169512195.1		HJC54_RS23005	2247276	2248319	-1	hypothetical protein
Chr1	2247276	2262539	15263	Predicted by at least one method	WP_169511691.1	istB	HJC54_RS23010	2248803	2249552	-1	IS21-like element helper ATPase IstB
Chr1	2247276	2262539	15263	Predicted by at least one method		istA	HJC54_RS23015	2249592	2251095	-1	IS21 family transposase
Chr1	2247276	2262539	15263	Predicted by at least one method	WP_169512196.1		HJC54_RS23020	2251443	2251778	1	hypothetical protein
Chr1	2247276	2262539	15263	Predicted by at least one method	WP_060040630.1		HJC54_RS23025	2251762	2251962	1	hypothetical protein
Chr1	2247276	2262539	15263	Predicted by at least one method			HJC54_RS23030	2252803	2254034	-1	IS3 family transposase
Chr1	2247276	2262539	15263	Predicted by at least one method	WP_169512198.1		HJC54_RS23035	2254142	2256394	-1	type I restriction enzyme HsdR N-terminal domain-containing protein
Chr1	2247276	2262539	15263	Predicted by at least one method	WP_155754313.1		HJC54_RS23040	2256764	2257117	1	hypothetical protein
Chr1	2247276	2262539	15263	Predicted by at least one method	WP_211437533.1		HJC54_RS23045	2257788	2258579	1	hypothetical protein
Chr1	2247276	2262539	15263	Predicted by at least one method	WP_169512199.1		HJC54_RS23050	2258601	2259257	-1	hypothetical protein
Chr1	2247276	2262539	15263	Predicted by at least one method	WP_060040214.1		HJC54_RS23055	2259244	2259840	-1	7-cyano-7-deazaguanine synthase
Chr1	2247276	2262539	15263	Predicted by at least one method	WP_060040212.1		HJC54_RS23060	2259837	2261036	-1	nucleoside 2-deoxyribosyltransferase
Chr1	2247276	2262539	15263	Predicted by at least one method	WP_169512200.1		HJC54_RS23065	2262057	2262539	1	hypothetical protein
Chr1	2254079	2262863	8784	Predicted by at least one method	WP_169512198.1		HJC54_RS23035	2254142	2256394	-1	type I restriction enzyme HsdR N-terminal domain-containing protein
Chr1	2254079	2262863	8784	Predicted by at least one method	WP_155754313.1		HJC54_RS23040	2256764	2257117	1	hypothetical protein
Chr1	2254079	2262863	8784	Predicted by at least one method	WP_211437533.1		HJC54_RS23045	2257788	2258579	1	hypothetical protein
Chr1	2254079	2262863	8784	Predicted by at least one method	WP_169512199.1		HJC54_RS23050	2258601	2259257	-1	hypothetical protein
Chr1	2254079	2262863	8784	Predicted by at least one method	WP_060040214.1		HJC54_RS23055	2259244	2259840	-1	7-cyano-7-deazaguanine synthase
Chr1	2254079	2262863	8784	Predicted by at least one method	WP_060040212.1		HJC54_RS23060	2259837	2261036	-1	nucleoside 2-deoxyribosyltransferase
Chr1	2254079	2262863	8784	Predicted by at least one method	WP_169512200.1		HJC54_RS23065	2262057	2262539	1	hypothetical protein
Chr1	2254079	2262863	8784	Predicted by at least one method	WP_015877195.1		HJC54_RS23070	2262810	2263271	1	GNAT family N-acetyltransferase
Chr1	2432507	2438930	6423	Predicted by at least one method	WP_045678857.1		HJC54_RS23885	2431644	2432510	-1	hypothetical protein
Chr1	2432507	2438930	6423	Predicted by at least one method	WP_017432214.1		HJC54_RS23890	2432507	2432656	-1	hypothetical protein
Chr1	2432507	2438930	6423	Predicted by at least one method	WP_017432213.1		HJC54_RS23895	2432656	2433390	-1	hypothetical protein
Chr1	2432507	2438930	6423	Predicted by at least one method	WP_127913923.1		HJC54_RS23900	2433393	2435219	-1	hypothetical protein
Chr1	2432507	2438930	6423	Predicted by at least one method	WP_042967236.1		HJC54_RS23905	2435222	2435392	-1	hypothetical protein
Chr1	2432507	2438930	6423	Predicted by at least one method	WP_017432210.1		HJC54_RS23910	2435389	2435829	-1	hypothetical protein
Chr1	2432507	2438930	6423	Predicted by at least one method	WP_017432208.1		HJC54_RS23915	2436318	2436677	-1	single-stranded DNA-binding protein
Chr1	2432507	2438930	6423	Predicted by at least one method	WP_017432207.1		HJC54_RS23920	2436990	2438930	-1	AAA family ATPase
Chr1	2432507	2438930	6423	Predicted by at least one method	WP_045678858.1		HJC54_RS23925	2438927	2439415	-1	hypothetical protein
Chr1	2784100	2798354	14254	Predicted by at least one method	WP_009962292.1		HJC54_RS25585	2783895	2784107	-1	hypothetical protein
Chr1	2784100	2798354	14254	Predicted by at least one method	WP_119637325.1		HJC54_RS25590	2784100	2784402	-1	hypothetical protein
Chr1	2784100	2798354	14254	Predicted by at least one method	WP_155634490.1		HJC54_RS25595	2784395	2784571	-1	hypothetical protein
Chr1	2784100	2798354	14254	Predicted by at least one method	WP_169512268.1		HJC54_RS25600	2784899	2785423	-1	hypothetical protein
Chr1	2784100	2798354	14254	Predicted by at least one method	WP_013699107.1		HJC54_RS25605	2785420	2785611	-1	AlpA family phage regulatory protein
Chr1	2784100	2798354	14254	Predicted by at least one method	WP_169512269.1		HJC54_RS25610	2786162	2786578	-1	hypothetical protein
Chr1	2784100	2798354	14254	Predicted by at least one method	WP_169512270.1		HJC54_RS25615	2786556	2787992	1	hypothetical protein
Chr1	2784100	2798354	14254	Predicted by at least one method	WP_169512271.1		HJC54_RS25620	2788169	2789449	1	hypothetical protein
Chr1	2784100	2798354	14254	Predicted by at least one method	WP_059560234.1		HJC54_RS25625	2789802	2790377	1	recombinase family protein
Chr1	2784100	2798354	14254	Predicted by at least one method	WP_169512272.1		HJC54_RS25630	2790446	2791642	1	toprim domain-containing protein
Chr1	2784100	2798354	14254	Predicted by at least one method	WP_169512273.1		HJC54_RS25635	2791932	2794859	1	RNA-directed DNA polymerase
Chr1	2784100	2798354	14254	Predicted by at least one method	WP_059560263.1		HJC54_RS25640	2794877	2795803	1	carbon-nitrogen hydrolase family protein
Chr1	2784100	2798354	14254	Predicted by at least one method	WP_059560243.1		HJC54_RS25645	2795967	2797085	-1	DUF3396 domain-containing protein
Chr1	2784100	2798354	14254	Predicted by at least one method	WP_059560246.1		HJC54_RS25650	2797090	2797830	-1	VRR-NUC domain-containing protein
Chr1	2784100	2798354	14254	Predicted by at least one method	WP_059560249.1		HJC54_RS25655	2797827	2798354	-1	PAAR domain-containing protein
Chr1	3238041	3267214	29173	Predicted by at least one method	WP_012734850.1		HJC54_RS27590	3237712	3238044	1	YkgJ family cysteine cluster protein
Chr1	3238041	3267214	29173	Predicted by at least one method	WP_012734851.1		HJC54_RS27595	3238041	3238628	1	DUF1439 domain-containing protein
Chr1	3238041	3267214	29173	Predicted by at least one method	WP_124836809.1		HJC54_RS27600	3238719	3239549	1	undecaprenyl-diphosphate phosphatase
Chr1	3238041	3267214	29173	Predicted by at least one method	WP_012734853.1	trmB	HJC54_RS27605	3239660	3240442	-1	tRNA (guanosine(46)-N7)-methyltransferase TrmB
Chr1	3238041	3267214	29173	Predicted by at least one method			HJC54_RS27610	3241004	3241165	-1	IS5/IS1182 family transposase
Chr1	3238041	3267214	29173	Predicted by at least one method	WP_169512343.1		HJC54_RS27615	3242200	3243525	1	hypothetical protein
Chr1	3238041	3267214	29173	Predicted by at least one method	WP_211437535.1		HJC54_RS27620	3243561	3244676	1	DUF262 domain-containing protein
Chr1	3238041	3267214	29173	Predicted by at least one method	WP_169512345.1		HJC54_RS27625	3244666	3245367	1	hypothetical protein
Chr1	3238041	3267214	29173	Predicted by at least one method	WP_169512346.1		HJC54_RS27630	3245414	3245644	-1	hypothetical protein
Chr1	3238041	3267214	29173	Predicted by at least one method	WP_169512347.1		HJC54_RS27635	3245846	3247279	-1	relaxase/mobilization nuclease domain-containing protein
Chr1	3238041	3267214	29173	Predicted by at least one method	WP_169512348.1		HJC54_RS27640	3247289	3247657	-1	hypothetical protein
Chr1	3238041	3267214	29173	Predicted by at least one method	WP_169512349.1		HJC54_RS27645	3248109	3248504	1	hypothetical protein
Chr1	3238041	3267214	29173	Predicted by at least one method	WP_169512350.1		HJC54_RS27650	3248594	3249106	1	hypothetical protein
Chr1	3238041	3267214	29173	Predicted by at least one method	WP_169512351.1		HJC54_RS27655	3249902	3250186	-1	hypothetical protein
Chr1	3238041	3267214	29173	Predicted by at least one method	WP_169512352.1		HJC54_RS27660	3250219	3251067	-1	hypothetical protein
Chr1	3238041	3267214	29173	Predicted by at least one method	WP_169512353.1		HJC54_RS27665	3251111	3251581	-1	hypothetical protein
Chr1	3238041	3267214	29173	Predicted by at least one method	WP_169512354.1		HJC54_RS27670	3251699	3252043	1	helix-turn-helix domain-containing protein
Chr1	3238041	3267214	29173	Predicted by at least one method	WP_169512355.1		HJC54_RS27675	3252044	3252589	-1	hypothetical protein
Chr1	3238041	3267214	29173	Predicted by at least one method	WP_169512356.1		HJC54_RS27680	3252862	3253287	-1	hypothetical protein
Chr1	3238041	3267214	29173	Predicted by at least one method	WP_169512357.1		HJC54_RS27685	3253325	3253618	-1	H-NS histone family protein
Chr1	3238041	3267214	29173	Predicted by at least one method	WP_169512358.1		HJC54_RS27690	3253711	3255144	-1	tyrosine-type recombinase/integrase
Chr1	3238041	3267214	29173	Predicted by at least one method	WP_169512359.1		HJC54_RS27700	3255682	3257223	1	AAA family ATPase
Chr1	3238041	3267214	29173	Predicted by at least one method	WP_169512360.1		HJC54_RS27705	3257227	3258084	1	HNH endonuclease
Chr1	3238041	3267214	29173	Predicted by at least one method			HJC54_RS27710	3258419	3259622	1	IS3 family transposase
Chr1	3238041	3267214	29173	Predicted by at least one method			HJC54_RS27715	3259959	3260599	-1	hypothetical protein
Chr1	3238041	3267214	29173	Predicted by at least one method	WP_012734855.1		HJC54_RS27720	3260675	3260899	1	hypothetical protein
Chr1	3238041	3267214	29173	Predicted by at least one method	WP_169512361.1		HJC54_RS27725	3261393	3262730	1	hypothetical protein
Chr1	3238041	3267214	29173	Predicted by at least one method	WP_169512362.1		HJC54_RS27730	3262727	3263485	1	hypothetical protein
Chr1	3238041	3267214	29173	Predicted by at least one method			HJC54_RS27735	3263498	3264298	1	hypothetical protein
Chr1	3238041	3267214	29173	Predicted by at least one method			HJC54_RS27740	3264859	3265086	-1	integrase core domain-containing protein
Chr1	3238041	3267214	29173	Predicted by at least one method	WP_169511140.1		HJC54_RS27745	3265156	3266267	1	IS3 family transposase
Chr1	3238041	3267214	29173	Predicted by at least one method	WP_017423043.1	crcB	HJC54_RS27750	3266828	3267214	1	fluoride efflux transporter CrcB
Chr1	3240579	3255269	14690	Predicted by at least one method			HJC54_RS27610	3241004	3241165	-1	IS5/IS1182 family transposase
Chr1	3240579	3255269	14690	Predicted by at least one method	WP_169512343.1		HJC54_RS27615	3242200	3243525	1	hypothetical protein
Chr1	3240579	3255269	14690	Predicted by at least one method	WP_211437535.1		HJC54_RS27620	3243561	3244676	1	DUF262 domain-containing protein
Chr1	3240579	3255269	14690	Predicted by at least one method	WP_169512345.1		HJC54_RS27625	3244666	3245367	1	hypothetical protein
Chr1	3240579	3255269	14690	Predicted by at least one method	WP_169512346.1		HJC54_RS27630	3245414	3245644	-1	hypothetical protein
Chr1	3240579	3255269	14690	Predicted by at least one method	WP_169512347.1		HJC54_RS27635	3245846	3247279	-1	relaxase/mobilization nuclease domain-containing protein
Chr1	3240579	3255269	14690	Predicted by at least one method	WP_169512348.1		HJC54_RS27640	3247289	3247657	-1	hypothetical protein
Chr1	3240579	3255269	14690	Predicted by at least one method	WP_169512349.1		HJC54_RS27645	3248109	3248504	1	hypothetical protein
Chr1	3240579	3255269	14690	Predicted by at least one method	WP_169512350.1		HJC54_RS27650	3248594	3249106	1	hypothetical protein
Chr1	3240579	3255269	14690	Predicted by at least one method	WP_169512351.1		HJC54_RS27655	3249902	3250186	-1	hypothetical protein
Chr1	3240579	3255269	14690	Predicted by at least one method	WP_169512352.1		HJC54_RS27660	3250219	3251067	-1	hypothetical protein
Chr1	3240579	3255269	14690	Predicted by at least one method	WP_169512353.1		HJC54_RS27665	3251111	3251581	-1	hypothetical protein
Chr1	3240579	3255269	14690	Predicted by at least one method	WP_169512354.1		HJC54_RS27670	3251699	3252043	1	helix-turn-helix domain-containing protein
Chr1	3240579	3255269	14690	Predicted by at least one method	WP_169512355.1		HJC54_RS27675	3252044	3252589	-1	hypothetical protein
Chr1	3240579	3255269	14690	Predicted by at least one method	WP_169512356.1		HJC54_RS27680	3252862	3253287	-1	hypothetical protein
Chr1	3240579	3255269	14690	Predicted by at least one method	WP_169512357.1		HJC54_RS27685	3253325	3253618	-1	H-NS histone family protein
Chr1	3240579	3255269	14690	Predicted by at least one method	WP_169512358.1		HJC54_RS27690	3253711	3255144	-1	tyrosine-type recombinase/integrase
Chr1	3573954	3578290	4336	Predicted by at least one method			HJC54_RS29150	3574261	3574617	1	hypothetical protein
Chr1	3573954	3578290	4336	Predicted by at least one method	WP_012735112.1		HJC54_RS29155	3574610	3575563	1	hypothetical protein
Chr1	3573954	3578290	4336	Predicted by at least one method	WP_169512414.1		HJC54_RS29160	3575616	3576542	-1	bile acid:sodium symporter family protein
Chr1	3573954	3578290	4336	Predicted by at least one method	WP_169512415.1		HJC54_RS29165	3576970	3577944	-1	hypothetical protein
Chr1	3573954	3578290	4336	Predicted by at least one method	WP_012735115.1	dxs	HJC54_RS29170	3578130	3580076	-1	1-deoxy-D-xylulose-5-phosphate synthase
Chr1	3585042	3594587	9545	Predicted by at least one method	WP_017423206.1		HJC54_RS29195	3585109	3585921	-1	iron-containing redox enzyme family protein
Chr1	3585042	3594587	9545	Predicted by at least one method	WP_012735121.1		HJC54_RS29200	3585939	3586745	-1	dihydrodipicolinate synthase family protein
Chr1	3585042	3594587	9545	Predicted by at least one method	WP_017423207.1		HJC54_RS29205	3586735	3587238	-1	hypothetical protein
Chr1	3585042	3594587	9545	Predicted by at least one method	WP_012735123.1		HJC54_RS29210	3587243	3588436	-1	aminotransferase class I/II-fold pyridoxal phosphate-dependent enzyme
Chr1	3585042	3594587	9545	Predicted by at least one method	WP_012735124.1		HJC54_RS29215	3588884	3589360	-1	cupin domain-containing protein
Chr1	3585042	3594587	9545	Predicted by at least one method	WP_012735125.1		HJC54_RS29220	3589391	3590428	-1	aromatic ring-hydroxylating dioxygenase subunit alpha
Chr1	3585042	3594587	9545	Predicted by at least one method	WP_169512417.1		HJC54_RS29225	3591117	3591431	1	hypothetical protein
Chr1	3585042	3594587	9545	Predicted by at least one method	WP_169512418.1		HJC54_RS29230	3591703	3591924	1	hypothetical protein
Chr1	3585042	3594587	9545	Predicted by at least one method	WP_012735126.1		HJC54_RS29235	3591928	3592653	1	LuxR family transcriptional regulator
Chr1	3585042	3594587	9545	Predicted by at least one method			HJC54_RS29240	3592679	3593790	-1	pyruvate dehydrogenase
Chr1	3585042	3594587	9545	Predicted by at least one method	WP_017923876.1		HJC54_RS29245	3593870	3594496	-1	glutathione S-transferase N-terminal domain-containing protein
Chr1	3604106	3611156	7050	Predicted by at least one method			HJC54_RS29295	3603701	3607445	1	response regulator
Chr1	3604106	3611156	7050	Predicted by at least one method			HJC54_RS29300	3608203	3609735	1	methyltransferase regulatory domain-containing protein
Chr1	3604106	3611156	7050	Predicted by at least one method			HJC54_RS29305	3609895	3611155	1	MFS transporter
Chr2	5704	29103	23399	Predicted by at least one method			HJC54_RS00030	5704	29103	-1	non-ribosomal peptide synthase/polyketide synthase
Chr2	64221	69018	4797	Predicted by at least one method	WP_035983148.1		HJC54_RS00195	64320	64730	-1	hypothetical protein
Chr2	64221	69018	4797	Predicted by at least one method	WP_035983147.1		HJC54_RS00200	64727	65161	-1	hypothetical protein
Chr2	64221	69018	4797	Predicted by at least one method	WP_169511100.1		HJC54_RS00205	65294	65932	-1	hypothetical protein
Chr2	64221	69018	4797	Predicted by at least one method	WP_155297058.1		HJC54_RS00210	65898	66731	-1	hypothetical protein
Chr2	64221	69018	4797	Predicted by at least one method	WP_155297057.1		HJC54_RS00215	66781	67050	-1	hypothetical protein
Chr2	64221	69018	4797	Predicted by at least one method	WP_017432955.1		HJC54_RS00220	67054	67278	-1	hypothetical protein
Chr2	64221	69018	4797	Predicted by at least one method	WP_017432954.1		HJC54_RS00225	67327	67581	1	hypothetical protein
Chr2	64221	69018	4797	Predicted by at least one method	WP_017432953.1		HJC54_RS00230	67620	67799	-1	hypothetical protein
Chr2	64221	69018	4797	Predicted by at least one method	WP_035983162.1		HJC54_RS00235	67796	68032	-1	helix-turn-helix domain-containing protein
Chr2	64221	69018	4797	Predicted by at least one method	WP_169511101.1		HJC54_RS00240	68103	68573	1	hypothetical protein
Chr2	64221	69018	4797	Predicted by at least one method			HJC54_RS00245	68936	69439	1	IS5 family transposase
Chr2	296212	359332	63120	Predicted by at least one method	WP_012733515.1		HJC54_RS01130	296212	296460	1	hypothetical protein
Chr2	296212	359332	63120	Predicted by at least one method	WP_017424264.1		HJC54_RS01135	297232	297420	-1	hypothetical protein
Chr2	296212	359332	63120	Predicted by at least one method			HJC54_RS01140	297841	298657	1	IS5 family transposase
Chr2	296212	359332	63120	Predicted by at least one method	WP_169511132.1		HJC54_RS01145	298676	301159	1	type VI secretion system tip protein VgrG
Chr2	296212	359332	63120	Predicted by at least one method	WP_211437525.1		HJC54_RS01150	301365	304025	1	cell wall hydrolase
Chr2	296212	359332	63120	Predicted by at least one method	WP_161521515.1		HJC54_RS01155	304506	304757	1	PAAR domain-containing protein
Chr2	296212	359332	63120	Predicted by at least one method	WP_169511134.1		HJC54_RS01160	305151	306542	1	integrase family protein
Chr2	296212	359332	63120	Predicted by at least one method	WP_169511135.1		HJC54_RS01165	306532	307371	1	hypothetical protein
Chr2	296212	359332	63120	Predicted by at least one method	WP_059825535.1		HJC54_RS01170	307516	308184	1	hypothetical protein
Chr2	296212	359332	63120	Predicted by at least one method	WP_060080794.1		HJC54_RS01175	308816	309034	-1	helix-turn-helix domain-containing protein
Chr2	296212	359332	63120	Predicted by at least one method			HJC54_RS01180	309518	310721	1	IS3 family transposase
Chr2	296212	359332	63120	Predicted by at least one method	WP_059825525.1		HJC54_RS01185	310772	311284	1	hypothetical protein
Chr2	296212	359332	63120	Predicted by at least one method	WP_169511136.1		HJC54_RS01190	311487	311765	1	hypothetical protein
Chr2	296212	359332	63120	Predicted by at least one method	WP_156444531.1		HJC54_RS01195	311884	312654	-1	hypothetical protein
Chr2	296212	359332	63120	Predicted by at least one method	WP_169511137.1		HJC54_RS01200	312840	315629	1	DotA/TraY family protein
Chr2	296212	359332	63120	Predicted by at least one method	WP_155630176.1		HJC54_RS01205	315830	316117	1	hypothetical protein
Chr2	296212	359332	63120	Predicted by at least one method	WP_059825664.1		HJC54_RS01210	316539	317141	-1	hypothetical protein
Chr2	296212	359332	63120	Predicted by at least one method			HJC54_RS01215	317461	317604	-1	serine/threonine protein phosphatase
Chr2	296212	359332	63120	Predicted by at least one method	WP_155630177.1		HJC54_RS01220	317671	317985	-1	hypothetical protein
Chr2	296212	359332	63120	Predicted by at least one method	WP_169511138.1		HJC54_RS01225	318124	318636	-1	hypothetical protein
Chr2	296212	359332	63120	Predicted by at least one method	WP_169511139.1		HJC54_RS01230	318729	319043	-1	hypothetical protein
Chr2	296212	359332	63120	Predicted by at least one method	WP_169511140.1		HJC54_RS01235	319239	320350	1	IS3 family transposase
Chr2	296212	359332	63120	Predicted by at least one method	WP_169511141.1		HJC54_RS01240	320937	321314	1	hypothetical protein
Chr2	296212	359332	63120	Predicted by at least one method	WP_169511142.1		HJC54_RS01245	322480	322917	1	replication/maintenance protein RepL
Chr2	296212	359332	63120	Predicted by at least one method	WP_169511143.1		HJC54_RS01250	323012	323998	-1	hypothetical protein
Chr2	296212	359332	63120	Predicted by at least one method	WP_059825503.1		HJC54_RS01255	323968	324357	-1	hypothetical protein
Chr2	296212	359332	63120	Predicted by at least one method	WP_169511144.1		HJC54_RS01260	324661	325482	1	hypothetical protein
Chr2	296212	359332	63120	Predicted by at least one method	WP_169511145.1		HJC54_RS01265	325514	326368	1	hypothetical protein
Chr2	296212	359332	63120	Predicted by at least one method	WP_169511146.1		HJC54_RS01270	326454	327749	1	hypothetical protein
Chr2	296212	359332	63120	Predicted by at least one method	WP_211437526.1		HJC54_RS01275	327746	328186	1	hypothetical protein
Chr2	296212	359332	63120	Predicted by at least one method	WP_169511148.1		HJC54_RS01280	328249	331881	-1	AAA family ATPase
Chr2	296212	359332	63120	Predicted by at least one method	WP_156444525.1		HJC54_RS01285	331878	332183	-1	hypothetical protein
Chr2	296212	359332	63120	Predicted by at least one method	WP_169511149.1		HJC54_RS01290	332155	332547	-1	hypothetical protein
Chr2	296212	359332	63120	Predicted by at least one method	WP_169511150.1		HJC54_RS01295	333099	333455	1	hypothetical protein
Chr2	296212	359332	63120	Predicted by at least one method	WP_169511151.1		HJC54_RS01300	333458	334054	1	hypothetical protein
Chr2	296212	359332	63120	Predicted by at least one method	WP_169511152.1		HJC54_RS01305	334509	334814	-1	hypothetical protein
Chr2	296212	359332	63120	Predicted by at least one method	WP_169511153.1		HJC54_RS01310	335112	335540	-1	hypothetical protein
Chr2	296212	359332	63120	Predicted by at least one method	WP_169511154.1		HJC54_RS01315	335595	335957	-1	hypothetical protein
Chr2	296212	359332	63120	Predicted by at least one method	WP_169511155.1		HJC54_RS01320	336069	336947	-1	hypothetical protein
Chr2	296212	359332	63120	Predicted by at least one method	WP_169511156.1		HJC54_RS01325	337105	337914	1	site-specific DNA-methyltransferase
Chr2	296212	359332	63120	Predicted by at least one method	WP_169511157.1		HJC54_RS01330	337949	338473	1	hypothetical protein
Chr2	296212	359332	63120	Predicted by at least one method	WP_169511158.1		HJC54_RS01335	338568	339113	-1	hypothetical protein
Chr2	296212	359332	63120	Predicted by at least one method	WP_169511159.1		HJC54_RS01340	339254	339841	1	ankyrin repeat domain-containing protein
Chr2	296212	359332	63120	Predicted by at least one method	WP_169511160.1		HJC54_RS01345	340236	341768	-1	potassium channel family protein
Chr2	296212	359332	63120	Predicted by at least one method	WP_169511161.1		HJC54_RS01350	341918	342670	-1	hypothetical protein
Chr2	296212	359332	63120	Predicted by at least one method	WP_211437527.1		HJC54_RS01355	342719	343693	-1	hypothetical protein
Chr2	296212	359332	63120	Predicted by at least one method	WP_169511163.1		HJC54_RS01360	343909	344523	-1	DUF2971 domain-containing protein
Chr2	296212	359332	63120	Predicted by at least one method	WP_169511164.1		HJC54_RS01365	344574	345596	-1	SMEK domain-containing protein
Chr2	296212	359332	63120	Predicted by at least one method	WP_169511165.1		HJC54_RS01370	345698	347128	-1	AAA family ATPase
Chr2	296212	359332	63120	Predicted by at least one method	WP_169511166.1		HJC54_RS01375	347121	348827	-1	AAA family ATPase
Chr2	296212	359332	63120	Predicted by at least one method	WP_169511167.1		HJC54_RS01380	348939	350888	-1	ATP-binding protein
Chr2	296212	359332	63120	Predicted by at least one method	WP_169511613.1	istA	HJC54_RS01385	351049	352551	1	IS21 family transposase
Chr2	296212	359332	63120	Predicted by at least one method	WP_012732720.1	istB	HJC54_RS01390	352544	353341	1	IS21-like element helper ATPase IstB
Chr2	296212	359332	63120	Predicted by at least one method	WP_015877616.1	rpoD	HJC54_RS01400	354003	356420	-1	RNA polymerase sigma factor RpoD
Chr2	296212	359332	63120	Predicted by at least one method	WP_169511168.1	dnaG	HJC54_RS01405	356550	358436	-1	DNA primase
Chr2	296212	359332	63120	Predicted by at least one method	WP_015877618.1		HJC54_RS01410	358489	358935	-1	GatB/YqeY domain-containing protein
Chr2	296212	359332	63120	Predicted by at least one method	WP_006479415.1	rpsU	HJC54_RS01415	359120	359332	-1	30S ribosomal protein S21
Chr2	304932	319171	14239	Predicted by at least one method	WP_169511134.1		HJC54_RS01160	305151	306542	1	integrase family protein
Chr2	304932	319171	14239	Predicted by at least one method	WP_169511135.1		HJC54_RS01165	306532	307371	1	hypothetical protein
Chr2	304932	319171	14239	Predicted by at least one method	WP_059825535.1		HJC54_RS01170	307516	308184	1	hypothetical protein
Chr2	304932	319171	14239	Predicted by at least one method	WP_060080794.1		HJC54_RS01175	308816	309034	-1	helix-turn-helix domain-containing protein
Chr2	304932	319171	14239	Predicted by at least one method			HJC54_RS01180	309518	310721	1	IS3 family transposase
Chr2	304932	319171	14239	Predicted by at least one method	WP_059825525.1		HJC54_RS01185	310772	311284	1	hypothetical protein
Chr2	304932	319171	14239	Predicted by at least one method	WP_169511136.1		HJC54_RS01190	311487	311765	1	hypothetical protein
Chr2	304932	319171	14239	Predicted by at least one method	WP_156444531.1		HJC54_RS01195	311884	312654	-1	hypothetical protein
Chr2	304932	319171	14239	Predicted by at least one method	WP_169511137.1		HJC54_RS01200	312840	315629	1	DotA/TraY family protein
Chr2	304932	319171	14239	Predicted by at least one method	WP_155630176.1		HJC54_RS01205	315830	316117	1	hypothetical protein
Chr2	304932	319171	14239	Predicted by at least one method	WP_059825664.1		HJC54_RS01210	316539	317141	-1	hypothetical protein
Chr2	304932	319171	14239	Predicted by at least one method			HJC54_RS01215	317461	317604	-1	serine/threonine protein phosphatase
Chr2	304932	319171	14239	Predicted by at least one method	WP_155630177.1		HJC54_RS01220	317671	317985	-1	hypothetical protein
Chr2	304932	319171	14239	Predicted by at least one method	WP_169511138.1		HJC54_RS01225	318124	318636	-1	hypothetical protein
Chr2	304932	319171	14239	Predicted by at least one method	WP_169511139.1		HJC54_RS01230	318729	319043	-1	hypothetical protein
Chr2	317671	350888	33217	Predicted by at least one method	WP_155630177.1		HJC54_RS01220	317671	317985	-1	hypothetical protein
Chr2	317671	350888	33217	Predicted by at least one method	WP_169511138.1		HJC54_RS01225	318124	318636	-1	hypothetical protein
Chr2	317671	350888	33217	Predicted by at least one method	WP_169511139.1		HJC54_RS01230	318729	319043	-1	hypothetical protein
Chr2	317671	350888	33217	Predicted by at least one method	WP_169511140.1		HJC54_RS01235	319239	320350	1	IS3 family transposase
Chr2	317671	350888	33217	Predicted by at least one method	WP_169511141.1		HJC54_RS01240	320937	321314	1	hypothetical protein
Chr2	317671	350888	33217	Predicted by at least one method	WP_169511142.1		HJC54_RS01245	322480	322917	1	replication/maintenance protein RepL
Chr2	317671	350888	33217	Predicted by at least one method	WP_169511143.1		HJC54_RS01250	323012	323998	-1	hypothetical protein
Chr2	317671	350888	33217	Predicted by at least one method	WP_059825503.1		HJC54_RS01255	323968	324357	-1	hypothetical protein
Chr2	317671	350888	33217	Predicted by at least one method	WP_169511144.1		HJC54_RS01260	324661	325482	1	hypothetical protein
Chr2	317671	350888	33217	Predicted by at least one method	WP_169511145.1		HJC54_RS01265	325514	326368	1	hypothetical protein
Chr2	317671	350888	33217	Predicted by at least one method	WP_169511146.1		HJC54_RS01270	326454	327749	1	hypothetical protein
Chr2	317671	350888	33217	Predicted by at least one method	WP_211437526.1		HJC54_RS01275	327746	328186	1	hypothetical protein
Chr2	317671	350888	33217	Predicted by at least one method	WP_169511148.1		HJC54_RS01280	328249	331881	-1	AAA family ATPase
Chr2	317671	350888	33217	Predicted by at least one method	WP_156444525.1		HJC54_RS01285	331878	332183	-1	hypothetical protein
Chr2	317671	350888	33217	Predicted by at least one method	WP_169511149.1		HJC54_RS01290	332155	332547	-1	hypothetical protein
Chr2	317671	350888	33217	Predicted by at least one method	WP_169511150.1		HJC54_RS01295	333099	333455	1	hypothetical protein
Chr2	317671	350888	33217	Predicted by at least one method	WP_169511151.1		HJC54_RS01300	333458	334054	1	hypothetical protein
Chr2	317671	350888	33217	Predicted by at least one method	WP_169511152.1		HJC54_RS01305	334509	334814	-1	hypothetical protein
Chr2	317671	350888	33217	Predicted by at least one method	WP_169511153.1		HJC54_RS01310	335112	335540	-1	hypothetical protein
Chr2	317671	350888	33217	Predicted by at least one method	WP_169511154.1		HJC54_RS01315	335595	335957	-1	hypothetical protein
Chr2	317671	350888	33217	Predicted by at least one method	WP_169511155.1		HJC54_RS01320	336069	336947	-1	hypothetical protein
Chr2	317671	350888	33217	Predicted by at least one method	WP_169511156.1		HJC54_RS01325	337105	337914	1	site-specific DNA-methyltransferase
Chr2	317671	350888	33217	Predicted by at least one method	WP_169511157.1		HJC54_RS01330	337949	338473	1	hypothetical protein
Chr2	317671	350888	33217	Predicted by at least one method	WP_169511158.1		HJC54_RS01335	338568	339113	-1	hypothetical protein
Chr2	317671	350888	33217	Predicted by at least one method	WP_169511159.1		HJC54_RS01340	339254	339841	1	ankyrin repeat domain-containing protein
Chr2	317671	350888	33217	Predicted by at least one method	WP_169511160.1		HJC54_RS01345	340236	341768	-1	potassium channel family protein
Chr2	317671	350888	33217	Predicted by at least one method	WP_169511161.1		HJC54_RS01350	341918	342670	-1	hypothetical protein
Chr2	317671	350888	33217	Predicted by at least one method	WP_211437527.1		HJC54_RS01355	342719	343693	-1	hypothetical protein
Chr2	317671	350888	33217	Predicted by at least one method	WP_169511163.1		HJC54_RS01360	343909	344523	-1	DUF2971 domain-containing protein
Chr2	317671	350888	33217	Predicted by at least one method	WP_169511164.1		HJC54_RS01365	344574	345596	-1	SMEK domain-containing protein
Chr2	317671	350888	33217	Predicted by at least one method	WP_169511165.1		HJC54_RS01370	345698	347128	-1	AAA family ATPase
Chr2	317671	350888	33217	Predicted by at least one method	WP_169511166.1		HJC54_RS01375	347121	348827	-1	AAA family ATPase
Chr2	317671	350888	33217	Predicted by at least one method	WP_169511167.1		HJC54_RS01380	348939	350888	-1	ATP-binding protein
Chr2	324303	331058	6755	Predicted by at least one method	WP_059825503.1		HJC54_RS01255	323968	324357	-1	hypothetical protein
Chr2	324303	331058	6755	Predicted by at least one method	WP_169511144.1		HJC54_RS01260	324661	325482	1	hypothetical protein
Chr2	324303	331058	6755	Predicted by at least one method	WP_169511145.1		HJC54_RS01265	325514	326368	1	hypothetical protein
Chr2	324303	331058	6755	Predicted by at least one method	WP_169511146.1		HJC54_RS01270	326454	327749	1	hypothetical protein
Chr2	324303	331058	6755	Predicted by at least one method	WP_211437526.1		HJC54_RS01275	327746	328186	1	hypothetical protein
Chr2	324303	331058	6755	Predicted by at least one method	WP_169511148.1		HJC54_RS01280	328249	331881	-1	AAA family ATPase
Chr2	331110	351011	19901	Predicted by at least one method	WP_169511148.1		HJC54_RS01280	328249	331881	-1	AAA family ATPase
Chr2	331110	351011	19901	Predicted by at least one method	WP_156444525.1		HJC54_RS01285	331878	332183	-1	hypothetical protein
Chr2	331110	351011	19901	Predicted by at least one method	WP_169511149.1		HJC54_RS01290	332155	332547	-1	hypothetical protein
Chr2	331110	351011	19901	Predicted by at least one method	WP_169511150.1		HJC54_RS01295	333099	333455	1	hypothetical protein
Chr2	331110	351011	19901	Predicted by at least one method	WP_169511151.1		HJC54_RS01300	333458	334054	1	hypothetical protein
Chr2	331110	351011	19901	Predicted by at least one method	WP_169511152.1		HJC54_RS01305	334509	334814	-1	hypothetical protein
Chr2	331110	351011	19901	Predicted by at least one method	WP_169511153.1		HJC54_RS01310	335112	335540	-1	hypothetical protein
Chr2	331110	351011	19901	Predicted by at least one method	WP_169511154.1		HJC54_RS01315	335595	335957	-1	hypothetical protein
Chr2	331110	351011	19901	Predicted by at least one method	WP_169511155.1		HJC54_RS01320	336069	336947	-1	hypothetical protein
Chr2	331110	351011	19901	Predicted by at least one method	WP_169511156.1		HJC54_RS01325	337105	337914	1	site-specific DNA-methyltransferase
Chr2	331110	351011	19901	Predicted by at least one method	WP_169511157.1		HJC54_RS01330	337949	338473	1	hypothetical protein
Chr2	331110	351011	19901	Predicted by at least one method	WP_169511158.1		HJC54_RS01335	338568	339113	-1	hypothetical protein
Chr2	331110	351011	19901	Predicted by at least one method	WP_169511159.1		HJC54_RS01340	339254	339841	1	ankyrin repeat domain-containing protein
Chr2	331110	351011	19901	Predicted by at least one method	WP_169511160.1		HJC54_RS01345	340236	341768	-1	potassium channel family protein
Chr2	331110	351011	19901	Predicted by at least one method	WP_169511161.1		HJC54_RS01350	341918	342670	-1	hypothetical protein
Chr2	331110	351011	19901	Predicted by at least one method	WP_211437527.1		HJC54_RS01355	342719	343693	-1	hypothetical protein
Chr2	331110	351011	19901	Predicted by at least one method	WP_169511163.1		HJC54_RS01360	343909	344523	-1	DUF2971 domain-containing protein
Chr2	331110	351011	19901	Predicted by at least one method	WP_169511164.1		HJC54_RS01365	344574	345596	-1	SMEK domain-containing protein
Chr2	331110	351011	19901	Predicted by at least one method	WP_169511165.1		HJC54_RS01370	345698	347128	-1	AAA family ATPase
Chr2	331110	351011	19901	Predicted by at least one method	WP_169511166.1		HJC54_RS01375	347121	348827	-1	AAA family ATPase
Chr2	331110	351011	19901	Predicted by at least one method	WP_169511167.1		HJC54_RS01380	348939	350888	-1	ATP-binding protein
Chr2	377566	384706	7140	Predicted by at least one method	WP_015877633.1		HJC54_RS01485	377566	377805	1	hypothetical protein
Chr2	377566	384706	7140	Predicted by at least one method	WP_015877634.1		HJC54_RS01490	378386	378868	1	DUF2778 domain-containing protein
Chr2	377566	384706	7140	Predicted by at least one method	WP_015877635.1		HJC54_RS01495	378865	379149	1	hypothetical protein
Chr2	377566	384706	7140	Predicted by at least one method	WP_015877636.1		HJC54_RS01500	379209	380192	-1	IS110 family transposase
Chr2	377566	384706	7140	Predicted by at least one method	WP_169511170.1		HJC54_RS01505	380250	381487	1	IS3 family transposase
Chr2	377566	384706	7140	Predicted by at least one method	WP_197964222.1		HJC54_RS01510	381702	382949	1	site-specific DNA-methyltransferase
Chr2	377566	384706	7140	Predicted by at least one method	WP_015877638.1		HJC54_RS01515	382946	383797	1	hypothetical protein
Chr2	377566	384706	7140	Predicted by at least one method			HJC54_RS01520	383890	384706	-1	IS5-like element ISBugl2 family transposase
Chr2	929683	934944	5261	Predicted by at least one method	WP_017424322.1		HJC54_RS04005	929459	931045	-1	MCP four helix bundle domain-containing protein
Chr2	929683	934944	5261	Predicted by at least one method			HJC54_RS04010	931797	931970	1	IS5/IS1182 family transposase
Chr2	929683	934944	5261	Predicted by at least one method			HJC54_RS04015	932746	934723	1	alpha-galactosidase
Chr2	1039757	1043940	4183	Predicted by at least one method	WP_035978615.1		HJC54_RS04445	1039757	1040047	-1	hypothetical protein
Chr2	1039757	1043940	4183	Predicted by at least one method	WP_169511284.1		HJC54_RS04450	1040258	1040404	-1	hypothetical protein
Chr2	1039757	1043940	4183	Predicted by at least one method	WP_042967439.1		HJC54_RS04455	1040376	1040837	-1	hypothetical protein
Chr2	1039757	1043940	4183	Predicted by at least one method	WP_169511285.1		HJC54_RS04460	1040834	1041505	-1	transglycosylase SLT domain-containing protein
Chr2	1039757	1043940	4183	Predicted by at least one method	WP_015878156.1		HJC54_RS04465	1041502	1041876	-1	putative holin
Chr2	1039757	1043940	4183	Predicted by at least one method	WP_080569416.1		HJC54_RS04470	1042608	1043141	-1	hypothetical protein
Chr2	1039757	1043940	4183	Predicted by at least one method	WP_015878157.1		HJC54_RS04475	1043196	1043666	-1	helix-turn-helix domain-containing protein
Chr2	1039757	1043940	4183	Predicted by at least one method			HJC54_RS04480	1043748	1043940	1	DNA-binding protein
Chr2	1044821	1061138	16317	Predicted by at least one method	WP_169511630.1		HJC54_RS04485	1044332	1044988	1	hypothetical protein
Chr2	1044821	1061138	16317	Predicted by at least one method	WP_017432569.1		HJC54_RS04490	1045028	1046653	1	Mu transposase C-terminal domain-containing protein
Chr2	1044821	1061138	16317	Predicted by at least one method	WP_015878161.1		HJC54_RS04495	1046663	1047655	1	AAA family ATPase
Chr2	1044821	1061138	16317	Predicted by at least one method	WP_127913876.1		HJC54_RS04500	1047663	1047878	1	hypothetical protein
Chr2	1044821	1061138	16317	Predicted by at least one method	WP_167343584.1		HJC54_RS04505	1047875	1048042	1	hypothetical protein
Chr2	1044821	1061138	16317	Predicted by at least one method			HJC54_RS04510	1048000	1048358	1	hypothetical protein
Chr2	1044821	1061138	16317	Predicted by at least one method	WP_169511286.1		HJC54_RS04515	1048360	1048800	1	regulatory protein GemA
Chr2	1044821	1061138	16317	Predicted by at least one method	WP_169511287.1		HJC54_RS04520	1048797	1049195	1	hypothetical protein
Chr2	1044821	1061138	16317	Predicted by at least one method			HJC54_RS04525	1049453	1049789	1	DUF1320 family protein
Chr2	1044821	1061138	16317	Predicted by at least one method	WP_015878164.1		HJC54_RS04530	1049786	1050220	1	phage virion morphogenesis protein
Chr2	1044821	1061138	16317	Predicted by at least one method	WP_017432226.1		HJC54_RS04535	1050220	1050834	1	hypothetical protein
Chr2	1044821	1061138	16317	Predicted by at least one method	WP_102952619.1		HJC54_RS04540	1050803	1051069	1	hypothetical protein
Chr2	1044821	1061138	16317	Predicted by at least one method	WP_015878165.1		HJC54_RS04545	1051120	1052598	1	tail sheath protein
Chr2	1044821	1061138	16317	Predicted by at least one method	WP_017432228.1		HJC54_RS04550	1052646	1053017	1	hypothetical protein
Chr2	1044821	1061138	16317	Predicted by at least one method	WP_017432229.1		HJC54_RS04555	1053107	1053655	1	phage tail assembly protein
Chr2	1044821	1061138	16317	Predicted by at least one method			HJC54_RS04560	1053704	1056095	1	phage tail tape measure protein
Chr2	1044821	1061138	16317	Predicted by at least one method	WP_169511288.1		HJC54_RS04565	1056099	1057469	1	DNA circularization N-terminal domain-containing protein
Chr2	1044821	1061138	16317	Predicted by at least one method	WP_169511289.1		HJC54_RS04570	1057473	1058642	1	hypothetical protein
Chr2	1044821	1061138	16317	Predicted by at least one method	WP_015878169.1		HJC54_RS04575	1058639	1059154	1	phage baseplate assembly protein
Chr2	1044821	1061138	16317	Predicted by at least one method	WP_169511631.1		HJC54_RS04580	1059239	1059826	1	phage GP46 family protein
Chr2	1044821	1061138	16317	Predicted by at least one method	WP_169511290.1		HJC54_RS04585	1059823	1060944	1	baseplate J/gp47 family protein
Chr2	1044821	1061138	16317	Predicted by at least one method	WP_015878172.1		HJC54_RS04590	1060944	1061540	1	DUF2313 domain-containing protein
Chr2	1050803	1060944	10141	Predicted by at least one method	WP_017432226.1		HJC54_RS04535	1050220	1050834	1	hypothetical protein
Chr2	1050803	1060944	10141	Predicted by at least one method	WP_102952619.1		HJC54_RS04540	1050803	1051069	1	hypothetical protein
Chr2	1050803	1060944	10141	Predicted by at least one method	WP_015878165.1		HJC54_RS04545	1051120	1052598	1	tail sheath protein
Chr2	1050803	1060944	10141	Predicted by at least one method	WP_017432228.1		HJC54_RS04550	1052646	1053017	1	hypothetical protein
Chr2	1050803	1060944	10141	Predicted by at least one method	WP_017432229.1		HJC54_RS04555	1053107	1053655	1	phage tail assembly protein
Chr2	1050803	1060944	10141	Predicted by at least one method			HJC54_RS04560	1053704	1056095	1	phage tail tape measure protein
Chr2	1050803	1060944	10141	Predicted by at least one method	WP_169511288.1		HJC54_RS04565	1056099	1057469	1	DNA circularization N-terminal domain-containing protein
Chr2	1050803	1060944	10141	Predicted by at least one method	WP_169511289.1		HJC54_RS04570	1057473	1058642	1	hypothetical protein
Chr2	1050803	1060944	10141	Predicted by at least one method	WP_015878169.1		HJC54_RS04575	1058639	1059154	1	phage baseplate assembly protein
Chr2	1050803	1060944	10141	Predicted by at least one method	WP_169511631.1		HJC54_RS04580	1059239	1059826	1	phage GP46 family protein
Chr2	1050803	1060944	10141	Predicted by at least one method	WP_169511290.1		HJC54_RS04585	1059823	1060944	1	baseplate J/gp47 family protein
Chr2	1278613	1282935	4322	Predicted by at least one method	WP_080630212.1		HJC54_RS05565	1278613	1281171	-1	hypothetical protein
Chr2	1278613	1282935	4322	Predicted by at least one method	WP_171466924.1		HJC54_RS05570	1281799	1282935	-1	helix-turn-helix domain-containing protein
Chr2	1307785	1315744	7959	Predicted by at least one method	WP_169511345.1		HJC54_RS05665	1307785	1308558	1	FCD domain-containing protein
Chr2	1307785	1315744	7959	Predicted by at least one method	WP_161521714.1	lldD	HJC54_RS05670	1308555	1309718	1	FMN-dependent L-lactate dehydrogenase LldD
Chr2	1307785	1315744	7959	Predicted by at least one method	WP_169511346.1	poxB	HJC54_RS05675	1309715	1311415	1	ubiquinone-dependent pyruvate dehydrogenase
Chr2	1307785	1315744	7959	Predicted by at least one method			HJC54_RS05680	1311381	1312183	-1	IS5 family transposase
Chr2	1307785	1315744	7959	Predicted by at least one method			HJC54_RS05685	1313117	1313933	-1	IS5 family transposase
Chr2	1307785	1315744	7959	Predicted by at least one method	WP_017423260.1		HJC54_RS05690	1314321	1314869	1	type 1 fimbrial protein
Chr2	1307785	1315744	7959	Predicted by at least one method	WP_169511347.1		HJC54_RS05695	1314965	1315744	1	fimbria/pilus periplasmic chaperone
Chr2	1352854	1363164	10310	Predicted by at least one method	WP_017432145.1		HJC54_RS05820	1352854	1353117	1	hypothetical protein
Chr2	1352854	1363164	10310	Predicted by at least one method	WP_169511356.1		HJC54_RS05825	1353114	1355435	1	response regulator
Chr2	1352854	1363164	10310	Predicted by at least one method	WP_157384073.1		HJC54_RS05830	1355703	1356119	-1	response regulator
Chr2	1352854	1363164	10310	Predicted by at least one method	WP_173941228.1		HJC54_RS29355	1356378	1356908	-1	hypothetical protein
Chr2	1352854	1363164	10310	Predicted by at least one method	WP_012733048.1		HJC54_RS05840	1358160	1358639	1	Lrp/AsnC family transcriptional regulator
Chr2	1352854	1363164	10310	Predicted by at least one method	WP_157384072.1		HJC54_RS05845	1360291	1360707	1	hypothetical protein
Chr2	1352854	1363164	10310	Predicted by at least one method	WP_169511357.1		HJC54_RS05850	1360704	1362023	1	YadA-like family protein
Chr2	1352854	1363164	10310	Predicted by at least one method			HJC54_RS05855	1362020	1363164	1	DUF2827 domain-containing protein
Chr2	1412255	1419556	7301	Predicted by at least one method	WP_169511636.1		HJC54_RS06070	1412255	1413235	1	DUF4123 domain-containing protein
Chr2	1412255	1419556	7301	Predicted by at least one method	WP_169511369.1		HJC54_RS06075	1413238	1414035	1	hypothetical protein
Chr2	1412255	1419556	7301	Predicted by at least one method	WP_169511370.1		HJC54_RS06080	1414028	1416280	1	DUF2235 domain-containing protein
Chr2	1412255	1419556	7301	Predicted by at least one method	WP_169511371.1		HJC54_RS06085	1416347	1417918	1	PAAR domain-containing protein
Chr2	1412255	1419556	7301	Predicted by at least one method	WP_012733088.1		HJC54_RS06090	1418006	1418263	1	PAAR domain-containing protein
Chr2	1412255	1419556	7301	Predicted by at least one method	WP_012733089.1		HJC54_RS06095	1418267	1419556	1	hypothetical protein
Chr2	1412255	1419556	7301	Predicted by at least one method	WP_169511372.1		HJC54_RS06100	1419553	1423074	1	type VI secretion protein VasK
Chr2	1810643	1816400	5757	Predicted by at least one method	WP_012733381.1		HJC54_RS07725	1810643	1810867	1	DUF2934 domain-containing protein
Chr2	1810643	1816400	5757	Predicted by at least one method	WP_017922785.1		HJC54_RS07730	1811386	1812396	-1	dienelactone hydrolase family protein
Chr2	1810643	1816400	5757	Predicted by at least one method	WP_012733383.1		HJC54_RS07735	1812790	1813131	1	HdeA family protein
Chr2	1810643	1816400	5757	Predicted by at least one method	WP_017424744.1		HJC54_RS07740	1814613	1816400	1	alpha-L-fucosidase
Chr2	1879100	1883828	4728	Predicted by at least one method	WP_169511443.1		HJC54_RS08000	1879100	1881484	1	M23 family metallopeptidase
Chr2	1879100	1883828	4728	Predicted by at least one method	WP_161521813.1		HJC54_RS08005	1881481	1882170	1	hypothetical protein
Chr2	1879100	1883828	4728	Predicted by at least one method	WP_080763683.1		HJC54_RS08010	1882216	1882476	1	PAAR domain-containing protein
Chr2	1879100	1883828	4728	Predicted by at least one method	WP_169511444.1		HJC54_RS08015	1882479	1883828	1	hypothetical protein
Chr2	1879100	1883828	4728	Predicted by at least one method	WP_169511445.1		HJC54_RS08020	1883809	1887372	1	type VI secretion protein VasK
Chr2	1936472	1962214	25742	Predicted by at least one method	WP_169511451.1		HJC54_RS08250	1936472	1937277	-1	IS5 family transposase
Chr2	1936472	1962214	25742	Predicted by at least one method	WP_169511452.1		HJC54_RS08255	1937432	1938562	1	hypothetical protein
Chr2	1936472	1962214	25742	Predicted by at least one method	WP_169511453.1		HJC54_RS08260	1938526	1939011	1	hypothetical protein
Chr2	1936472	1962214	25742	Predicted by at least one method	WP_169511454.1		HJC54_RS08265	1939008	1940138	1	hypothetical protein
Chr2	1936472	1962214	25742	Predicted by at least one method			HJC54_RS08270	1940080	1940856	1	hypothetical protein
Chr2	1936472	1962214	25742	Predicted by at least one method	WP_012733479.1		HJC54_RS08275	1940994	1941425	1	hypothetical protein
Chr2	1936472	1962214	25742	Predicted by at least one method	WP_012733480.1		HJC54_RS08280	1941849	1942928	-1	porin
Chr2	1936472	1962214	25742	Predicted by at least one method			HJC54_RS08285	1943042	1944329	-1	MFS transporter
Chr2	1936472	1962214	25742	Predicted by at least one method	WP_012733482.1		HJC54_RS08290	1944684	1945157	1	MarR family transcriptional regulator
Chr2	1936472	1962214	25742	Predicted by at least one method	WP_169511455.1		HJC54_RS08295	1945211	1947370	-1	acetate--CoA ligase family protein
Chr2	1936472	1962214	25742	Predicted by at least one method	WP_100556546.1		HJC54_RS08300	1947389	1948222	-1	p-hydroxycinnamoyl CoA hydratase/lyase
Chr2	1936472	1962214	25742	Predicted by at least one method	WP_017424352.1		HJC54_RS08305	1948293	1949765	-1	benzaldehyde dehydrogenase
Chr2	1936472	1962214	25742	Predicted by at least one method	WP_012733486.1		HJC54_RS08310	1949803	1950570	-1	coniferyl-alcohol dehydrogenase
Chr2	1936472	1962214	25742	Predicted by at least one method			HJC54_RS08315	1950980	1951159	1	integrase
Chr2	1936472	1962214	25742	Predicted by at least one method	WP_153479126.1		HJC54_RS08320	1951265	1951531	1	DUF333 domain-containing protein
Chr2	1936472	1962214	25742	Predicted by at least one method	WP_169511456.1		HJC54_RS08325	1951832	1952648	-1	IS5 family transposase
Chr2	1936472	1962214	25742	Predicted by at least one method			HJC54_RS08330	1953370	1954462	-1	IS5 family transposase
Chr2	1936472	1962214	25742	Predicted by at least one method			HJC54_RS08335	1954531	1954869	-1	DUF3560 domain-containing protein
Chr2	1936472	1962214	25742	Predicted by at least one method			HJC54_RS08340	1954869	1955114	1	DDE-type integrase/transposase/recombinase
Chr2	1936472	1962214	25742	Predicted by at least one method	WP_169511457.1		HJC54_RS08345	1955451	1958129	1	type VI secretion system tip protein VgrG
Chr2	1936472	1962214	25742	Predicted by at least one method	WP_169511458.1		HJC54_RS08350	1958126	1959856	1	hypothetical protein
Chr2	1936472	1962214	25742	Predicted by at least one method	WP_124837823.1		HJC54_RS08355	1959937	1960806	1	hypothetical protein
Chr2	1936472	1962214	25742	Predicted by at least one method			HJC54_RS08360	1960920	1961323	1	transposase
Chr2	1936472	1962214	25742	Predicted by at least one method	WP_169511459.1		HJC54_RS08365	1961759	1962214	-1	NUDIX domain-containing protein
Chr2	1979760	1990141	10381	Predicted by at least one method	WP_157384115.1		HJC54_RS08475	1979760	1980146	1	hypothetical protein
Chr2	1979760	1990141	10381	Predicted by at least one method	WP_012733510.1	trpS	HJC54_RS08480	1980258	1981280	-1	tryptophan--tRNA ligase
Chr2	1979760	1990141	10381	Predicted by at least one method	WP_153478652.1		HJC54_RS08485	1981476	1981700	-1	DUF4260 family protein
Chr2	1979760	1990141	10381	Predicted by at least one method	WP_169511464.1		HJC54_RS08490	1982102	1982830	1	GNAT family N-acetyltransferase
Chr2	1979760	1990141	10381	Predicted by at least one method			HJC54_RS08495	1983040	1983658	-1	tyrosine-type recombinase/integrase
Chr2	1979760	1990141	10381	Predicted by at least one method	WP_169511465.1		HJC54_RS08500	1983781	1984275	-1	GNAT family N-acetyltransferase
Chr2	1979760	1990141	10381	Predicted by at least one method	WP_017423816.1		HJC54_RS08505	1984432	1984941	1	dihydrofolate reductase
Chr2	1979760	1990141	10381	Predicted by at least one method	WP_169511466.1		HJC54_RS08510	1985681	1986376	1	class I SAM-dependent methyltransferase
Chr2	1979760	1990141	10381	Predicted by at least one method	WP_169511467.1		HJC54_RS08515	1986661	1986894	1	hypothetical protein
Chr2	1979760	1990141	10381	Predicted by at least one method			HJC54_RS08520	1987656	1988491	1	ATP-binding cassette domain-containing protein
Chr2	1979760	1990141	10381	Predicted by at least one method	WP_159372656.1	trxA	HJC54_RS08525	1988568	1989806	1	thioredoxin
Chr2	1979760	1990141	10381	Predicted by at least one method	WP_153479032.1		HJC54_RS08530	1989836	1990141	-1	hypothetical protein
Chr2	2326841	2331496	4655	Predicted by at least one method	WP_017423363.1		HJC54_RS09935	2326841	2327305	-1	GNAT family N-acetyltransferase
Chr2	2326841	2331496	4655	Predicted by at least one method			HJC54_RS09940	2327795	2329126	1	IS701 family transposase
Chr2	2326841	2331496	4655	Predicted by at least one method			HJC54_RS09945	2329138	2329941	-1	IS5 family transposase
Chr2	2326841	2331496	4655	Predicted by at least one method	WP_127913899.1		HJC54_RS09950	2330783	2331496	1	hypothetical protein
Chr2	2542690	2547641	4951	Predicted by at least one method	WP_169511170.1		HJC54_RS10700	2542690	2543927	1	IS3 family transposase
Chr2	2542690	2547641	4951	Predicted by at least one method			HJC54_RS10705	2545108	2545341	1	hypothetical protein
Chr2	2542690	2547641	4951	Predicted by at least one method			HJC54_RS10710	2545338	2546084	1	hypothetical protein
Chr2	2542690	2547641	4951	Predicted by at least one method	WP_012733880.1		HJC54_RS10715	2546136	2546387	1	PAAR domain-containing protein
Chr2	2542690	2547641	4951	Predicted by at least one method	WP_161521937.1		HJC54_RS10720	2546397	2547641	1	hypothetical protein
Chr2	2542690	2547641	4951	Predicted by at least one method	WP_169511564.1		HJC54_RS10725	2547638	2551162	1	type VI secretion protein VasK

## Sheet: HN2
genomic islands information of Burkholderia glumae strain HN2
Chr	Island start	Island end	Length	Method	Gene name	Gene ID	Locus	Gene start	Gene end	Strand	Product
Chr1	1	5314	5313	Predicted by at least one method	WP_185731579.1		GAS18_RS28590	1	4632	1	hypothetical protein
Chr1	1	5314	5313	Predicted by at least one method	WP_124836357.1		GAS18_RS00015	4651	9024	1	thioester reductase domain-containing protein
Chr1	415302	419304	4002	Predicted by at least one method	WP_015875805.1	araG	GAS18_RS01910	413965	415506	1	L-arabinose ABC transporter ATP-binding protein AraG
Chr1	415302	419304	4002	Predicted by at least one method	WP_015875804.1	araH	GAS18_RS01915	415569	416579	1	L-arabinose ABC transporter permease AraH
Chr1	415302	419304	4002	Predicted by at least one method	WP_026051576.1	rarD	GAS18_RS01920	416849	417742	-1	EamA family transporter RarD
Chr1	415302	419304	4002	Predicted by at least one method	WP_015875802.1		GAS18_RS01925	418930	419748	1	TIM barrel protein
Chr1	416849	422620	5771	Predicted by at least one method	WP_026051576.1	rarD	GAS18_RS01920	416849	417742	-1	EamA family transporter RarD
Chr1	416849	422620	5771	Predicted by at least one method	WP_015875802.1		GAS18_RS01925	418930	419748	1	TIM barrel protein
Chr1	416849	422620	5771	Predicted by at least one method	WP_124836821.1		GAS18_RS01930	419769	421514	1	FAD-dependent oxidoreductase
Chr1	416849	422620	5771	Predicted by at least one method	WP_015875800.1		GAS18_RS01935	421787	422620	1	aldo/keto reductase
Chr1	419771	424442	4671	Predicted by at least one method	WP_124836821.1		GAS18_RS01930	419769	421514	1	FAD-dependent oxidoreductase
Chr1	419771	424442	4671	Predicted by at least one method	WP_015875800.1		GAS18_RS01935	421787	422620	1	aldo/keto reductase
Chr1	419771	424442	4671	Predicted by at least one method	WP_124836822.1		GAS18_RS01940	423088	424113	1	hypothetical protein
Chr1	561942	567628	5686	Predicted by at least one method	WP_017922172.1		GAS18_RS02590	562153	563091	-1	NADP-dependent oxidoreductase
Chr1	561942	567628	5686	Predicted by at least one method	WP_015875547.1		GAS18_RS02595	563438	564574	1	glutathione-independent formaldehyde dehydrogenase
Chr1	561942	567628	5686	Predicted by at least one method	WP_015875546.1		GAS18_RS02600	564696	565598	1	SDR family oxidoreductase
Chr1	561942	567628	5686	Predicted by at least one method	WP_017922171.1		GAS18_RS02605	565595	566377	1	PIG-L family deacetylase
Chr1	561942	567628	5686	Predicted by at least one method	WP_015875544.1		GAS18_RS02610	566398	567381	1	glycosyltransferase
Chr1	561942	567628	5686	Predicted by at least one method	WP_124836060.1		GAS18_RS02615	567371	570040	-1	ATP-binding cassette domain-containing protein
Chr1	899929	912089	12160	Predicted by at least one method	WP_015875278.1		GAS18_RS04110	900249	901121	-1	LysR family transcriptional regulator
Chr1	899929	912089	12160	Predicted by at least one method	WP_171466581.1		GAS18_RS04115	901118	902086	-1	M20/M25/M40 family metallo-hydrolase
Chr1	899929	912089	12160	Predicted by at least one method	WP_171466582.1		GAS18_RS04120	903314	903598	1	hypothetical protein
Chr1	899929	912089	12160	Predicted by at least one method	WP_171466583.1		GAS18_RS04125	903757	904344	1	hypothetical protein
Chr1	899929	912089	12160	Predicted by at least one method	WP_171466584.1		GAS18_RS04130	904634	905439	-1	IS5 family transposase
Chr1	899929	912089	12160	Predicted by at least one method	WP_171466585.1		GAS18_RS04135	905492	906729	-1	IS3-like element IS1416 family transposase
Chr1	899929	912089	12160	Predicted by at least one method			GAS18_RS04140	907041	907855	1	IS5 family transposase
Chr1	899929	912089	12160	Predicted by at least one method	WP_171466586.1		GAS18_RS04145	907890	909344	1	hypothetical protein
Chr1	899929	912089	12160	Predicted by at least one method	WP_080630213.1		GAS18_RS04150	909536	910021	-1	cupin domain-containing protein
Chr1	899929	912089	12160	Predicted by at least one method	WP_012735235.1		GAS18_RS04155	910405	910659	-1	hypothetical protein
Chr1	899929	912089	12160	Predicted by at least one method	WP_124836695.1		GAS18_RS04160	911192	914734	1	response regulator
Chr1	1019470	1028946	9476	Predicted by at least one method	WP_124836714.1		GAS18_RS04645	1019554	1021065	-1	MFS transporter
Chr1	1019470	1028946	9476	Predicted by at least one method	WP_124836715.1		GAS18_RS04650	1021225	1022766	-1	class I SAM-dependent methyltransferase
Chr1	1019470	1028946	9476	Predicted by at least one method	WP_012735139.1		GAS18_RS04655	1023101	1023418	1	hypothetical protein
Chr1	1019470	1028946	9476	Predicted by at least one method	WP_124836737.1		GAS18_RS04660	1023531	1027286	-1	response regulator
Chr1	1019470	1028946	9476	Predicted by at least one method	WP_012735137.1		GAS18_RS04665	1028414	1029646	1	SpoIIE family protein phosphatase
Chr1	1029071	1034772	5701	Predicted by at least one method	WP_012735137.1		GAS18_RS04665	1028414	1029646	1	SpoIIE family protein phosphatase
Chr1	1029071	1034772	5701	Predicted by at least one method	WP_012735136.1		GAS18_RS04670	1029659	1030222	1	SiaB family protein kinase
Chr1	1029071	1034772	5701	Predicted by at least one method	WP_012735135.1		GAS18_RS04675	1030246	1030632	1	DUF1987 domain-containing protein
Chr1	1029071	1034772	5701	Predicted by at least one method	WP_012735134.1		GAS18_RS04680	1030642	1031367	1	GGDEF domain-containing protein
Chr1	1029071	1034772	5701	Predicted by at least one method	WP_012735133.1		GAS18_RS04685	1031591	1031836	1	ferrous iron transport protein A
Chr1	1029071	1034772	5701	Predicted by at least one method	WP_124836716.1		GAS18_RS04690	1031833	1033701	1	ferrous iron transporter B
Chr1	1029071	1034772	5701	Predicted by at least one method	WP_012735130.1		GAS18_RS04695	1034100	1034699	-1	hypothetical protein
Chr1	1029071	1034772	5701	Predicted by at least one method	WP_012735129.1		GAS18_RS04700	1034696	1035247	-1	peptidoglycan domain-containing protein
Chr1	1034973	1050106	15133	Predicted by at least one method	WP_012735129.1		GAS18_RS04700	1034696	1035247	-1	peptidoglycan domain-containing protein
Chr1	1034973	1050106	15133	Predicted by at least one method	WP_017923876.1		GAS18_RS04705	1035608	1036234	1	glutathione S-transferase N-terminal domain-containing protein
Chr1	1034973	1050106	15133	Predicted by at least one method	WP_012735127.1		GAS18_RS04710	1036314	1037426	1	hypothetical protein
Chr1	1034973	1050106	15133	Predicted by at least one method	WP_171466587.1		GAS18_RS04715	1037452	1038177	-1	LuxR family transcriptional regulator
Chr1	1034973	1050106	15133	Predicted by at least one method	WP_124836717.1		GAS18_RS04720	1038674	1038988	-1	hypothetical protein
Chr1	1034973	1050106	15133	Predicted by at least one method	WP_012735125.1		GAS18_RS04725	1039677	1040714	1	aromatic ring-hydroxylating dioxygenase subunit alpha
Chr1	1034973	1050106	15133	Predicted by at least one method	WP_012735124.1		GAS18_RS04730	1040745	1041221	1	cupin domain-containing protein
Chr1	1034973	1050106	15133	Predicted by at least one method	WP_012735123.1		GAS18_RS04735	1041670	1042863	1	aminotransferase class I/II-fold pyridoxal phosphate-dependent enzyme
Chr1	1034973	1050106	15133	Predicted by at least one method	WP_017423207.1		GAS18_RS04740	1042868	1043371	1	hypothetical protein
Chr1	1034973	1050106	15133	Predicted by at least one method	WP_012735121.1		GAS18_RS04745	1043361	1044167	1	dihydrodipicolinate synthase family protein
Chr1	1034973	1050106	15133	Predicted by at least one method	WP_017423206.1		GAS18_RS04750	1044185	1044997	1	iron-containing redox enzyme family protein
Chr1	1034973	1050106	15133	Predicted by at least one method	WP_012735119.1		GAS18_RS04755	1045176	1045436	1	Rieske 2Fe-2S domain-containing protein
Chr1	1034973	1050106	15133	Predicted by at least one method	WP_012735118.1		GAS18_RS04760	1045512	1046324	1	inositol-phosphate phosphatase
Chr1	1034973	1050106	15133	Predicted by at least one method	WP_012735117.1		GAS18_RS04765	1046355	1046819	-1	MarR family transcriptional regulator
Chr1	1034973	1050106	15133	Predicted by at least one method	WP_012735116.1	aceE	GAS18_RS04770	1047005	1049677	1	pyruvate dehydrogenase (acetyl-transferring), homodimeric type
Chr1	1034973	1050106	15133	Predicted by at least one method	WP_124836718.1	dxs	GAS18_RS04775	1050030	1051976	1	1-deoxy-D-xylulose-5-phosphate synthase
Chr1	1495806	1501697	5891	Predicted by at least one method	WP_124836489.1		GAS18_RS06785	1495806	1496957	1	hypothetical protein
Chr1	1495806	1501697	5891	Predicted by at least one method	WP_171466812.1		GAS18_RS06790	1496968	1497762	1	ABC transporter permease
Chr1	1495806	1501697	5891	Predicted by at least one method	WP_124836491.1		GAS18_RS06795	1497759	1498400	1	ABC transporter ATP-binding protein
Chr1	1495806	1501697	5891	Predicted by at least one method	WP_124836492.1		GAS18_RS06800	1498426	1499688	1	glycosyltransferase family 4 protein
Chr1	1495806	1501697	5891	Predicted by at least one method	WP_124836493.1		GAS18_RS06805	1499683	1500810	-1	glycosyltransferase family 4 protein
Chr1	1495806	1501697	5891	Predicted by at least one method	WP_124836494.1		GAS18_RS06810	1500807	1501697	-1	GDP-mannose 4,6-dehydratase
Chr1	1502759	1513669	10910	Predicted by at least one method	WP_124836496.1		GAS18_RS06820	1502759	1506109	-1	glycosyltransferase
Chr1	1502759	1513669	10910	Predicted by at least one method	WP_124836497.1		GAS18_RS06825	1506164	1508854	-1	FkbM family methyltransferase
Chr1	1502759	1513669	10910	Predicted by at least one method	WP_124836498.1		GAS18_RS06830	1509095	1510306	-1	polysaccharide export protein
Chr1	1502759	1513669	10910	Predicted by at least one method	WP_124836499.1		GAS18_RS06835	1510460	1511617	1	glycosyltransferase family 4 protein
Chr1	1502759	1513669	10910	Predicted by at least one method	WP_171466602.1		GAS18_RS06840	1511621	1513669	1	capsular biosynthesis protein
Chr1	1753052	1800067	47015	Predicted by at least one method	WP_171466814.1		GAS18_RS07915	1753052	1754182	-1	DGQHR domain-containing protein
Chr1	1753052	1800067	47015	Predicted by at least one method	WP_006400877.1	istB	GAS18_RS07920	1754234	1754983	-1	IS21-like element ISBmu3 family helper ATPase IstB
Chr1	1753052	1800067	47015	Predicted by at least one method			GAS18_RS07925	1754999	1755493	-1	IS21 family transposase
Chr1	1753052	1800067	47015	Predicted by at least one method	WP_153479231.1		GAS18_RS07930	1755583	1756059	1	transposase
Chr1	1753052	1800067	47015	Predicted by at least one method	WP_171466616.1	tnpB	GAS18_RS07935	1756035	1756385	1	IS66 family insertion sequence element accessory protein TnpB
Chr1	1753052	1800067	47015	Predicted by at least one method			GAS18_RS07940	1756417	1757972	1	IS66 family transposase
Chr1	1753052	1800067	47015	Predicted by at least one method		istA	GAS18_RS07945	1757999	1759060	-1	IS21 family transposase
Chr1	1753052	1800067	47015	Predicted by at least one method	WP_017924734.1		GAS18_RS07950	1759109	1759246	1	hypothetical protein
Chr1	1753052	1800067	47015	Predicted by at least one method	WP_171466617.1		GAS18_RS07955	1759497	1760024	-1	hypothetical protein
Chr1	1753052	1800067	47015	Predicted by at least one method	WP_171466618.1		GAS18_RS07960	1760042	1761583	-1	DUF1832 domain-containing protein
Chr1	1753052	1800067	47015	Predicted by at least one method	WP_171466619.1	dndD	GAS18_RS07965	1761580	1763739	-1	DNA sulfur modification protein DndD
Chr1	1753052	1800067	47015	Predicted by at least one method	WP_171466620.1		GAS18_RS07970	1763666	1763878	-1	hypothetical protein
Chr1	1753052	1800067	47015	Predicted by at least one method	WP_216617157.1	dndC	GAS18_RS07975	1763871	1764998	-1	DNA phosphorothioation system sulfurtransferase DndC
Chr1	1753052	1800067	47015	Predicted by at least one method			GAS18_RS07980	1765131	1765830	1	IS66 family transposase
Chr1	1753052	1800067	47015	Predicted by at least one method	WP_171466816.1		GAS18_RS07985	1766116	1767021	1	AAA family ATPase
Chr1	1753052	1800067	47015	Predicted by at least one method			GAS18_RS07990	1767803	1767965	-1	IS66 family transposase
Chr1	1753052	1800067	47015	Predicted by at least one method	WP_171466621.1		GAS18_RS07995	1768018	1768545	-1	hypothetical protein
Chr1	1753052	1800067	47015	Predicted by at least one method	WP_171466622.1		GAS18_RS08000	1768548	1771259	-1	hypothetical protein
Chr1	1753052	1800067	47015	Predicted by at least one method	WP_171466623.1		GAS18_RS08005	1771313	1773838	-1	type VI secretion system tip protein VgrG
Chr1	1753052	1800067	47015	Predicted by at least one method	WP_171466817.1		GAS18_RS08010	1775113	1775403	1	hypothetical protein
Chr1	1753052	1800067	47015	Predicted by at least one method	WP_171466624.1		GAS18_RS08015	1775521	1776486	1	DUF932 domain-containing protein
Chr1	1753052	1800067	47015	Predicted by at least one method	WP_171466625.1		GAS18_RS08020	1776566	1777561	1	YqaJ viral recombinase family protein
Chr1	1753052	1800067	47015	Predicted by at least one method	WP_171466626.1		GAS18_RS08025	1777573	1777800	1	hypothetical protein
Chr1	1753052	1800067	47015	Predicted by at least one method	WP_171466627.1		GAS18_RS08030	1777851	1778759	1	phage capsid protein
Chr1	1753052	1800067	47015	Predicted by at least one method	WP_171466628.1		GAS18_RS08035	1778756	1779844	1	hypothetical protein
Chr1	1753052	1800067	47015	Predicted by at least one method	WP_171466629.1		GAS18_RS08040	1779905	1780711	1	DUF4942 domain-containing protein
Chr1	1753052	1800067	47015	Predicted by at least one method	WP_153479231.1		GAS18_RS08045	1780923	1781399	1	transposase
Chr1	1753052	1800067	47015	Predicted by at least one method	WP_171466616.1	tnpB	GAS18_RS08050	1781375	1781725	1	IS66 family insertion sequence element accessory protein TnpB
Chr1	1753052	1800067	47015	Predicted by at least one method			GAS18_RS08055	1781757	1783312	1	IS66 family transposase
Chr1	1753052	1800067	47015	Predicted by at least one method	WP_171466818.1		GAS18_RS08060	1783309	1783623	1	hypothetical protein
Chr1	1753052	1800067	47015	Predicted by at least one method	WP_083294592.1		GAS18_RS08065	1783653	1784000	-1	helix-turn-helix domain-containing protein
Chr1	1753052	1800067	47015	Predicted by at least one method			GAS18_RS08070	1784229	1786000	1	hypothetical protein
Chr1	1753052	1800067	47015	Predicted by at least one method	WP_171466630.1		GAS18_RS08075	1786144	1787523	1	DUF4087 domain-containing protein
Chr1	1753052	1800067	47015	Predicted by at least one method	WP_171466631.1		GAS18_RS08080	1787831	1788721	-1	ImmA/IrrE family metallo-endopeptidase
Chr1	1753052	1800067	47015	Predicted by at least one method	WP_171466632.1		GAS18_RS08085	1788714	1789037	-1	helix-turn-helix domain-containing protein
Chr1	1753052	1800067	47015	Predicted by at least one method	WP_171466633.1		GAS18_RS08090	1789261	1789566	1	DUF3892 domain-containing protein
Chr1	1753052	1800067	47015	Predicted by at least one method	WP_171466634.1		GAS18_RS08095	1789582	1789785	1	DUF2188 domain-containing protein
Chr1	1753052	1800067	47015	Predicted by at least one method	WP_171466635.1		GAS18_RS08100	1789975	1791414	1	hypothetical protein
Chr1	1753052	1800067	47015	Predicted by at least one method	WP_171466636.1		GAS18_RS08105	1791488	1792222	-1	hypothetical protein
Chr1	1753052	1800067	47015	Predicted by at least one method	WP_171466637.1		GAS18_RS08110	1792674	1793099	-1	hypothetical protein
Chr1	1753052	1800067	47015	Predicted by at least one method			GAS18_RS08115	1793150	1793578	1	ATP-binding protein
Chr1	1753052	1800067	47015	Predicted by at least one method			GAS18_RS08120	1793882	1794160	1	hypothetical protein
Chr1	1753052	1800067	47015	Predicted by at least one method	WP_171466638.1		GAS18_RS08125	1794534	1795160	1	hypothetical protein
Chr1	1753052	1800067	47015	Predicted by at least one method	WP_171466639.1		GAS18_RS08130	1795165	1795779	-1	hypothetical protein
Chr1	1753052	1800067	47015	Predicted by at least one method	WP_171466640.1		GAS18_RS08135	1796255	1797418	-1	hypothetical protein
Chr1	1753052	1800067	47015	Predicted by at least one method	WP_171466641.1		GAS18_RS08140	1798268	1800067	-1	DUF3987 domain-containing protein
Chr1	1758001	1763005	5004	Predicted by at least one method		istA	GAS18_RS07945	1757999	1759060	-1	IS21 family transposase
Chr1	1758001	1763005	5004	Predicted by at least one method	WP_017924734.1		GAS18_RS07950	1759109	1759246	1	hypothetical protein
Chr1	1758001	1763005	5004	Predicted by at least one method	WP_171466617.1		GAS18_RS07955	1759497	1760024	-1	hypothetical protein
Chr1	1758001	1763005	5004	Predicted by at least one method	WP_171466618.1		GAS18_RS07960	1760042	1761583	-1	DUF1832 domain-containing protein
Chr1	1758001	1763005	5004	Predicted by at least one method	WP_171466619.1	dndD	GAS18_RS07965	1761580	1763739	-1	DNA sulfur modification protein DndD
Chr1	1759109	1763739	4630	Predicted by at least one method	WP_017924734.1		GAS18_RS07950	1759109	1759246	1	hypothetical protein
Chr1	1759109	1763739	4630	Predicted by at least one method	WP_171466617.1		GAS18_RS07955	1759497	1760024	-1	hypothetical protein
Chr1	1759109	1763739	4630	Predicted by at least one method	WP_171466618.1		GAS18_RS07960	1760042	1761583	-1	DUF1832 domain-containing protein
Chr1	1759109	1763739	4630	Predicted by at least one method	WP_171466619.1	dndD	GAS18_RS07965	1761580	1763739	-1	DNA sulfur modification protein DndD
Chr1	1759109	1763739	4630	Predicted by at least one method	WP_171466620.1		GAS18_RS07970	1763666	1763878	-1	hypothetical protein
Chr1	1763214	1769738	6524	Predicted by at least one method	WP_171466619.1	dndD	GAS18_RS07965	1761580	1763739	-1	DNA sulfur modification protein DndD
Chr1	1763214	1769738	6524	Predicted by at least one method	WP_171466620.1		GAS18_RS07970	1763666	1763878	-1	hypothetical protein
Chr1	1763214	1769738	6524	Predicted by at least one method	WP_216617157.1	dndC	GAS18_RS07975	1763871	1764998	-1	DNA phosphorothioation system sulfurtransferase DndC
Chr1	1763214	1769738	6524	Predicted by at least one method			GAS18_RS07980	1765131	1765830	1	IS66 family transposase
Chr1	1763214	1769738	6524	Predicted by at least one method	WP_171466816.1		GAS18_RS07985	1766116	1767021	1	AAA family ATPase
Chr1	1763214	1769738	6524	Predicted by at least one method			GAS18_RS07990	1767803	1767965	-1	IS66 family transposase
Chr1	1763214	1769738	6524	Predicted by at least one method	WP_171466621.1		GAS18_RS07995	1768018	1768545	-1	hypothetical protein
Chr1	1763214	1769738	6524	Predicted by at least one method	WP_171466622.1		GAS18_RS08000	1768548	1771259	-1	hypothetical protein
Chr1	1768018	1789037	21019	Predicted by at least one method	WP_171466621.1		GAS18_RS07995	1768018	1768545	-1	hypothetical protein
Chr1	1768018	1789037	21019	Predicted by at least one method	WP_171466622.1		GAS18_RS08000	1768548	1771259	-1	hypothetical protein
Chr1	1768018	1789037	21019	Predicted by at least one method	WP_171466623.1		GAS18_RS08005	1771313	1773838	-1	type VI secretion system tip protein VgrG
Chr1	1768018	1789037	21019	Predicted by at least one method	WP_171466817.1		GAS18_RS08010	1775113	1775403	1	hypothetical protein
Chr1	1768018	1789037	21019	Predicted by at least one method	WP_171466624.1		GAS18_RS08015	1775521	1776486	1	DUF932 domain-containing protein
Chr1	1768018	1789037	21019	Predicted by at least one method	WP_171466625.1		GAS18_RS08020	1776566	1777561	1	YqaJ viral recombinase family protein
Chr1	1768018	1789037	21019	Predicted by at least one method	WP_171466626.1		GAS18_RS08025	1777573	1777800	1	hypothetical protein
Chr1	1768018	1789037	21019	Predicted by at least one method	WP_171466627.1		GAS18_RS08030	1777851	1778759	1	phage capsid protein
Chr1	1768018	1789037	21019	Predicted by at least one method	WP_171466628.1		GAS18_RS08035	1778756	1779844	1	hypothetical protein
Chr1	1768018	1789037	21019	Predicted by at least one method	WP_171466629.1		GAS18_RS08040	1779905	1780711	1	DUF4942 domain-containing protein
Chr1	1768018	1789037	21019	Predicted by at least one method	WP_153479231.1		GAS18_RS08045	1780923	1781399	1	transposase
Chr1	1768018	1789037	21019	Predicted by at least one method	WP_171466616.1	tnpB	GAS18_RS08050	1781375	1781725	1	IS66 family insertion sequence element accessory protein TnpB
Chr1	1768018	1789037	21019	Predicted by at least one method			GAS18_RS08055	1781757	1783312	1	IS66 family transposase
Chr1	1768018	1789037	21019	Predicted by at least one method	WP_171466818.1		GAS18_RS08060	1783309	1783623	1	hypothetical protein
Chr1	1768018	1789037	21019	Predicted by at least one method	WP_083294592.1		GAS18_RS08065	1783653	1784000	-1	helix-turn-helix domain-containing protein
Chr1	1768018	1789037	21019	Predicted by at least one method			GAS18_RS08070	1784229	1786000	1	hypothetical protein
Chr1	1768018	1789037	21019	Predicted by at least one method	WP_171466630.1		GAS18_RS08075	1786144	1787523	1	DUF4087 domain-containing protein
Chr1	1768018	1789037	21019	Predicted by at least one method	WP_171466631.1		GAS18_RS08080	1787831	1788721	-1	ImmA/IrrE family metallo-endopeptidase
Chr1	1768018	1789037	21019	Predicted by at least one method	WP_171466632.1		GAS18_RS08085	1788714	1789037	-1	helix-turn-helix domain-containing protein
Chr1	1776053	1780834	4781	Predicted by at least one method	WP_171466624.1		GAS18_RS08015	1775521	1776486	1	DUF932 domain-containing protein
Chr1	1776053	1780834	4781	Predicted by at least one method	WP_171466625.1		GAS18_RS08020	1776566	1777561	1	YqaJ viral recombinase family protein
Chr1	1776053	1780834	4781	Predicted by at least one method	WP_171466626.1		GAS18_RS08025	1777573	1777800	1	hypothetical protein
Chr1	1776053	1780834	4781	Predicted by at least one method	WP_171466627.1		GAS18_RS08030	1777851	1778759	1	phage capsid protein
Chr1	1776053	1780834	4781	Predicted by at least one method	WP_171466628.1		GAS18_RS08035	1778756	1779844	1	hypothetical protein
Chr1	1776053	1780834	4781	Predicted by at least one method	WP_171466629.1		GAS18_RS08040	1779905	1780711	1	DUF4942 domain-containing protein
Chr1	1783338	1793408	10070	Predicted by at least one method	WP_171466818.1		GAS18_RS08060	1783309	1783623	1	hypothetical protein
Chr1	1783338	1793408	10070	Predicted by at least one method	WP_083294592.1		GAS18_RS08065	1783653	1784000	-1	helix-turn-helix domain-containing protein
Chr1	1783338	1793408	10070	Predicted by at least one method			GAS18_RS08070	1784229	1786000	1	hypothetical protein
Chr1	1783338	1793408	10070	Predicted by at least one method	WP_171466630.1		GAS18_RS08075	1786144	1787523	1	DUF4087 domain-containing protein
Chr1	1783338	1793408	10070	Predicted by at least one method	WP_171466631.1		GAS18_RS08080	1787831	1788721	-1	ImmA/IrrE family metallo-endopeptidase
Chr1	1783338	1793408	10070	Predicted by at least one method	WP_171466632.1		GAS18_RS08085	1788714	1789037	-1	helix-turn-helix domain-containing protein
Chr1	1783338	1793408	10070	Predicted by at least one method	WP_171466633.1		GAS18_RS08090	1789261	1789566	1	DUF3892 domain-containing protein
Chr1	1783338	1793408	10070	Predicted by at least one method	WP_171466634.1		GAS18_RS08095	1789582	1789785	1	DUF2188 domain-containing protein
Chr1	1783338	1793408	10070	Predicted by at least one method	WP_171466635.1		GAS18_RS08100	1789975	1791414	1	hypothetical protein
Chr1	1783338	1793408	10070	Predicted by at least one method	WP_171466636.1		GAS18_RS08105	1791488	1792222	-1	hypothetical protein
Chr1	1783338	1793408	10070	Predicted by at least one method	WP_171466637.1		GAS18_RS08110	1792674	1793099	-1	hypothetical protein
Chr1	1783338	1793408	10070	Predicted by at least one method			GAS18_RS08115	1793150	1793578	1	ATP-binding protein
Chr1	1795924	1803168	7244	Predicted by at least one method	WP_171466640.1		GAS18_RS08135	1796255	1797418	-1	hypothetical protein
Chr1	1795924	1803168	7244	Predicted by at least one method	WP_171466641.1		GAS18_RS08140	1798268	1800067	-1	DUF3987 domain-containing protein
Chr1	1795924	1803168	7244	Predicted by at least one method	WP_171466642.1		GAS18_RS08145	1800078	1801271	-1	hypothetical protein
Chr1	1795924	1803168	7244	Predicted by at least one method	WP_171466819.1		GAS18_RS08150	1801284	1801496	-1	AlpA family phage regulatory protein
Chr1	1795924	1803168	7244	Predicted by at least one method	WP_171466643.1		GAS18_RS08155	1801768	1802808	-1	hypothetical protein
Chr1	1795924	1803168	7244	Predicted by at least one method	WP_100556496.1		GAS18_RS08160	1803166	1803756	1	aminodeoxychorismate/anthranilate synthase component II
Chr1	1864272	1873372	9100	Predicted by at least one method	WP_124837385.1		GAS18_RS08425	1864272	1864904	-1	hypothetical protein
Chr1	1864272	1873372	9100	Predicted by at least one method	WP_169512275.1		GAS18_RS08430	1864901	1865077	-1	N-acetylmuramidase domain-containing protein
Chr1	1864272	1873372	9100	Predicted by at least one method	WP_124837383.1		GAS18_RS08435	1865086	1865259	-1	N-acetylmuramidase domain-containing protein
Chr1	1864272	1873372	9100	Predicted by at least one method	WP_076611266.1		GAS18_RS08440	1865498	1866314	1	IS5-like element ISBugl2 family transposase
Chr1	1864272	1873372	9100	Predicted by at least one method	WP_124837840.1		GAS18_RS08445	1866324	1867910	-1	type I restriction-modification system subunit M
Chr1	1864272	1873372	9100	Predicted by at least one method	WP_124837842.1		GAS18_RS08450	1868120	1868632	1	hypothetical protein
Chr1	1864272	1873372	9100	Predicted by at least one method	WP_171466645.1		GAS18_RS08455	1868969	1869109	1	hypothetical protein
Chr1	1864272	1873372	9100	Predicted by at least one method			GAS18_RS08460	1869773	1871328	-1	IS66 family transposase
Chr1	1864272	1873372	9100	Predicted by at least one method	WP_171466616.1	tnpB	GAS18_RS08465	1871360	1871710	-1	IS66 family insertion sequence element accessory protein TnpB
Chr1	1864272	1873372	9100	Predicted by at least one method			GAS18_RS08470	1871686	1872161	-1	transposase
Chr1	1864272	1873372	9100	Predicted by at least one method	WP_171466646.1		GAS18_RS08475	1872209	1872442	-1	hypothetical protein
Chr1	1864272	1873372	9100	Predicted by at least one method	WP_124837209.1		GAS18_RS08480	1872623	1873372	-1	hypothetical protein
Chr1	2166475	2196828	30353	Predicted by at least one method	WP_124836253.1	gspD	GAS18_RS09880	2164172	2166478	1	type II secretion system secretin GspD
Chr1	2166475	2196828	30353	Predicted by at least one method	WP_012734144.1	gspE	GAS18_RS09885	2166475	2167959	1	type II secretion system ATPase GspE
Chr1	2166475	2196828	30353	Predicted by at least one method	WP_012734143.1	gspF	GAS18_RS09890	2167964	2169181	1	type II secretion system inner membrane protein GspF
Chr1	2166475	2196828	30353	Predicted by at least one method	WP_012734142.1		GAS18_RS09895	2169263	2169673	-1	general secretion pathway protein GspC
Chr1	2166475	2196828	30353	Predicted by at least one method	WP_012734141.1	gspG	GAS18_RS09900	2169823	2170275	1	type II secretion system major pseudopilin GspG
Chr1	2166475	2196828	30353	Predicted by at least one method	WP_012734140.1		GAS18_RS09905	2170322	2170813	1	GspH/FimT family pseudopilin
Chr1	2166475	2196828	30353	Predicted by at least one method	WP_012734139.1	gspI	GAS18_RS09910	2170810	2171229	1	type II secretion system minor pseudopilin GspI
Chr1	2166475	2196828	30353	Predicted by at least one method	WP_035978575.1		GAS18_RS09915	2171207	2171884	1	prepilin-type N-terminal cleavage/methylation domain-containing protein
Chr1	2166475	2196828	30353	Predicted by at least one method	WP_017425333.1	gspK	GAS18_RS09920	2171881	2173017	1	type II secretion system minor pseudopilin GspK
Chr1	2166475	2196828	30353	Predicted by at least one method	WP_124836188.1	gspL	GAS18_RS09925	2173042	2174454	1	type II secretion system protein GspL
Chr1	2166475	2196828	30353	Predicted by at least one method	WP_012734135.1		GAS18_RS09930	2174451	2174954	1	type II secretion system protein M
Chr1	2166475	2196828	30353	Predicted by at least one method	WP_017924430.1		GAS18_RS09935	2175007	2175783	1	type II secretion system protein N
Chr1	2166475	2196828	30353	Predicted by at least one method	WP_012734133.1		GAS18_RS09940	2175897	2177420	-1	efflux transporter outer membrane subunit
Chr1	2166475	2196828	30353	Predicted by at least one method	WP_012734132.1		GAS18_RS09945	2177735	2178196	1	MarR family transcriptional regulator
Chr1	2166475	2196828	30353	Predicted by at least one method	WP_012734131.1		GAS18_RS09950	2178304	2179248	-1	LysR family transcriptional regulator
Chr1	2166475	2196828	30353	Predicted by at least one method	WP_012734130.1	fliL	GAS18_RS09955	2179688	2180188	1	flagellar basal body-associated protein FliL
Chr1	2166475	2196828	30353	Predicted by at least one method	WP_012734129.1	fliM	GAS18_RS09960	2180207	2181205	1	flagellar motor switch protein FliM
Chr1	2166475	2196828	30353	Predicted by at least one method	WP_012734128.1	fliN	GAS18_RS09965	2181198	2181632	1	flagellar motor switch protein FliN
Chr1	2166475	2196828	30353	Predicted by at least one method	WP_012734127.1	fliO	GAS18_RS09970	2181629	2182222	1	flagellar biosynthetic protein FliO
Chr1	2166475	2196828	30353	Predicted by at least one method	WP_026051420.1	fliP	GAS18_RS09975	2182270	2183025	1	flagellar type III secretion system pore protein FliP
Chr1	2166475	2196828	30353	Predicted by at least one method	WP_012734125.1	fliQ	GAS18_RS09980	2183039	2183311	1	flagellar biosynthesis protein FliQ
Chr1	2166475	2196828	30353	Predicted by at least one method	WP_012734124.1	fliR	GAS18_RS09985	2183346	2184125	1	flagellar biosynthetic protein FliR
Chr1	2166475	2196828	30353	Predicted by at least one method	WP_012734123.1		GAS18_RS09990	2184462	2186486	1	site-specific DNA-methyltransferase
Chr1	2166475	2196828	30353	Predicted by at least one method	WP_124836254.1		GAS18_RS09995	2186531	2189575	1	DEAD/DEAH box helicase family protein
Chr1	2166475	2196828	30353	Predicted by at least one method	WP_012734121.1		GAS18_RS10000	2190271	2191059	-1	anti-sigma factor
Chr1	2166475	2196828	30353	Predicted by at least one method	WP_012734120.1		GAS18_RS10005	2191056	2191571	-1	sigma-70 family RNA polymerase sigma factor
Chr1	2166475	2196828	30353	Predicted by at least one method	WP_012734119.1		GAS18_RS10010	2191774	2192847	1	catalase family peroxidase
Chr1	2166475	2196828	30353	Predicted by at least one method	WP_124836189.1		GAS18_RS10015	2192844	2193389	1	cytochrome b/b6 domain-containing protein
Chr1	2166475	2196828	30353	Predicted by at least one method	WP_124836190.1		GAS18_RS10020	2193443	2193799	-1	DUF1311 domain-containing protein
Chr1	2166475	2196828	30353	Predicted by at least one method			GAS18_RS10025	2194094	2195219	1	IS3 family transposase
Chr1	2166475	2196828	30353	Predicted by at least one method	WP_017425404.1		GAS18_RS10030	2195293	2195784	-1	hypothetical protein
Chr1	2166475	2196828	30353	Predicted by at least one method	WP_080569276.1		GAS18_RS10035	2195994	2196149	1	transposase
Chr1	2166475	2196828	30353	Predicted by at least one method	WP_017432601.1		GAS18_RS10040	2196604	2196828	1	hypothetical protein
Chr1	2231086	2247016	15930	Predicted by at least one method	WP_171466666.1		GAS18_RS10210	2231086	2232063	1	hypothetical protein
Chr1	2231086	2247016	15930	Predicted by at least one method	WP_171466667.1		GAS18_RS10215	2232060	2233586	1	SIR2 family protein
Chr1	2231086	2247016	15930	Predicted by at least one method			GAS18_RS10220	2233743	2234218	1	transposase
Chr1	2231086	2247016	15930	Predicted by at least one method	WP_171466616.1	tnpB	GAS18_RS10225	2234194	2234544	1	IS66 family insertion sequence element accessory protein TnpB
Chr1	2231086	2247016	15930	Predicted by at least one method			GAS18_RS10230	2234576	2236131	1	IS66 family transposase
Chr1	2231086	2247016	15930	Predicted by at least one method	WP_171466668.1		GAS18_RS10235	2236315	2237490	-1	DUF3396 domain-containing protein
Chr1	2231086	2247016	15930	Predicted by at least one method	WP_171466669.1		GAS18_RS10240	2237500	2238237	-1	VRR-NUC domain-containing protein
Chr1	2231086	2247016	15930	Predicted by at least one method	WP_171466670.1		GAS18_RS10245	2238234	2238755	-1	PAAR domain-containing protein
Chr1	2231086	2247016	15930	Predicted by at least one method	WP_216617146.1		GAS18_RS28605	2239108	2240541	1	HNH endonuclease
Chr1	2231086	2247016	15930	Predicted by at least one method	WP_216617147.1		GAS18_RS10255	2240928	2241611	1	hypothetical protein
Chr1	2231086	2247016	15930	Predicted by at least one method	WP_171466671.1		GAS18_RS10260	2241740	2242936	-1	hypothetical protein
Chr1	2231086	2247016	15930	Predicted by at least one method	WP_171466672.1		GAS18_RS10265	2243085	2244851	-1	hypothetical protein
Chr1	2231086	2247016	15930	Predicted by at least one method	WP_171466673.1		GAS18_RS10270	2245073	2245399	1	helix-turn-helix domain-containing protein
Chr1	2231086	2247016	15930	Predicted by at least one method			GAS18_RS10275	2245693	2245986	-1	hypothetical protein
Chr1	2231086	2247016	15930	Predicted by at least one method	WP_171466674.1		GAS18_RS10280	2246087	2247016	-1	hypothetical protein
Chr1	2231086	2247016	15930	Predicted by at least one method	WP_171466675.1		GAS18_RS10285	2247013	2247936	-1	phage capsid protein
Chr1	2234741	2245146	10405	Predicted by at least one method			GAS18_RS10230	2234576	2236131	1	IS66 family transposase
Chr1	2234741	2245146	10405	Predicted by at least one method	WP_171466668.1		GAS18_RS10235	2236315	2237490	-1	DUF3396 domain-containing protein
Chr1	2234741	2245146	10405	Predicted by at least one method	WP_171466669.1		GAS18_RS10240	2237500	2238237	-1	VRR-NUC domain-containing protein
Chr1	2234741	2245146	10405	Predicted by at least one method	WP_171466670.1		GAS18_RS10245	2238234	2238755	-1	PAAR domain-containing protein
Chr1	2234741	2245146	10405	Predicted by at least one method	WP_216617146.1		GAS18_RS28605	2239108	2240541	1	HNH endonuclease
Chr1	2234741	2245146	10405	Predicted by at least one method	WP_216617147.1		GAS18_RS10255	2240928	2241611	1	hypothetical protein
Chr1	2234741	2245146	10405	Predicted by at least one method	WP_171466671.1		GAS18_RS10260	2241740	2242936	-1	hypothetical protein
Chr1	2234741	2245146	10405	Predicted by at least one method	WP_171466672.1		GAS18_RS10265	2243085	2244851	-1	hypothetical protein
Chr1	2234741	2245146	10405	Predicted by at least one method	WP_171466673.1		GAS18_RS10270	2245073	2245399	1	helix-turn-helix domain-containing protein
Chr1	2245358	2251492	6134	Predicted by at least one method	WP_171466673.1		GAS18_RS10270	2245073	2245399	1	helix-turn-helix domain-containing protein
Chr1	2245358	2251492	6134	Predicted by at least one method			GAS18_RS10275	2245693	2245986	-1	hypothetical protein
Chr1	2245358	2251492	6134	Predicted by at least one method	WP_171466674.1		GAS18_RS10280	2246087	2247016	-1	hypothetical protein
Chr1	2245358	2251492	6134	Predicted by at least one method	WP_171466675.1		GAS18_RS10285	2247013	2247936	-1	phage capsid protein
Chr1	2245358	2251492	6134	Predicted by at least one method	WP_171466676.1		GAS18_RS10290	2247992	2248219	-1	hypothetical protein
Chr1	2245358	2251492	6134	Predicted by at least one method	WP_171466677.1		GAS18_RS10295	2248232	2249227	-1	YqaJ viral recombinase family protein
Chr1	2245358	2251492	6134	Predicted by at least one method	WP_171466678.1		GAS18_RS10300	2249309	2250274	-1	DUF932 domain-containing protein
Chr1	2245358	2251492	6134	Predicted by at least one method	WP_171466825.1		GAS18_RS10305	2250365	2250592	-1	hypothetical protein
Chr1	2245358	2251492	6134	Predicted by at least one method	WP_171466679.1		GAS18_RS10310	2251327	2252109	1	sigma-70 family RNA polymerase sigma factor
Chr1	2246087	2250274	4187	Predicted by at least one method	WP_171466674.1		GAS18_RS10280	2246087	2247016	-1	hypothetical protein
Chr1	2246087	2250274	4187	Predicted by at least one method	WP_171466675.1		GAS18_RS10285	2247013	2247936	-1	phage capsid protein
Chr1	2246087	2250274	4187	Predicted by at least one method	WP_171466676.1		GAS18_RS10290	2247992	2248219	-1	hypothetical protein
Chr1	2246087	2250274	4187	Predicted by at least one method	WP_171466677.1		GAS18_RS10295	2248232	2249227	-1	YqaJ viral recombinase family protein
Chr1	2246087	2250274	4187	Predicted by at least one method	WP_171466678.1		GAS18_RS10300	2249309	2250274	-1	DUF932 domain-containing protein
Chr1	2251327	2256047	4720	Predicted by at least one method	WP_171466679.1		GAS18_RS10310	2251327	2252109	1	sigma-70 family RNA polymerase sigma factor
Chr1	2251327	2256047	4720	Predicted by at least one method	WP_171466680.1		GAS18_RS10315	2252106	2252669	1	hypothetical protein
Chr1	2251327	2256047	4720	Predicted by at least one method	WP_216617159.1		GAS18_RS10320	2252730	2256047	1	UvrD-helicase domain-containing protein
Chr1	2258699	2272590	13891	Predicted by at least one method	WP_171466684.1		GAS18_RS10335	2258699	2259829	1	DNA repair exonuclease
Chr1	2258699	2272590	13891	Predicted by at least one method	WP_171466685.1		GAS18_RS10340	2259826	2262468	1	AAA family ATPase
Chr1	2258699	2272590	13891	Predicted by at least one method	WP_171466686.1	zorA	GAS18_RS10345	2262972	2264984	1	anti-phage defense ZorAB system protein ZorA
Chr1	2258699	2272590	13891	Predicted by at least one method	WP_171466687.1		GAS18_RS10350	2264988	2265713	1	cell envelope biogenesis protein OmpA
Chr1	2258699	2272590	13891	Predicted by at least one method	WP_171466688.1		GAS18_RS10355	2265710	2267350	1	hypothetical protein
Chr1	2258699	2272590	13891	Predicted by at least one method	WP_171466689.1		GAS18_RS10360	2267355	2271116	1	restriction endonuclease
Chr1	2258699	2272590	13891	Predicted by at least one method			GAS18_RS10365	2271223	2271657	-1	DUF3396 domain-containing protein
Chr1	2258699	2272590	13891	Predicted by at least one method	WP_015877330.1		GAS18_RS10375	2272186	2272590	1	PaaI family thioesterase
Chr1	2262753	2271842	9089	Predicted by at least one method	WP_171466686.1	zorA	GAS18_RS10345	2262972	2264984	1	anti-phage defense ZorAB system protein ZorA
Chr1	2262753	2271842	9089	Predicted by at least one method	WP_171466687.1		GAS18_RS10350	2264988	2265713	1	cell envelope biogenesis protein OmpA
Chr1	2262753	2271842	9089	Predicted by at least one method	WP_171466688.1		GAS18_RS10355	2265710	2267350	1	hypothetical protein
Chr1	2262753	2271842	9089	Predicted by at least one method	WP_171466689.1		GAS18_RS10360	2267355	2271116	1	restriction endonuclease
Chr1	2262753	2271842	9089	Predicted by at least one method			GAS18_RS10365	2271223	2271657	-1	DUF3396 domain-containing protein
Chr1	2481203	2486629	5426	Predicted by at least one method			GAS18_RS11275	2480866	2481213	1	IS21 family transposase
Chr1	2481203	2486629	5426	Predicted by at least one method		istB	GAS18_RS11280	2481203	2481979	1	IS21-like element helper ATPase IstB
Chr1	2481203	2486629	5426	Predicted by at least one method	WP_124837881.1		GAS18_RS11285	2482447	2482683	1	hypothetical protein
Chr1	2481203	2486629	5426	Predicted by at least one method	WP_171466699.1		GAS18_RS11290	2483024	2484070	1	IS481 family transposase
Chr1	2481203	2486629	5426	Predicted by at least one method	WP_171466829.1		GAS18_RS11295	2484104	2484906	1	IS5 family transposase
Chr1	2481203	2486629	5426	Predicted by at least one method	WP_216617148.1		GAS18_RS28615	2485248	2486270	1	hypothetical protein
Chr1	2481203	2486629	5426	Predicted by at least one method	WP_124836912.1		GAS18_RS11305	2486267	2486629	1	immunity 8 family protein
Chr1	2551065	2564783	13718	Predicted by at least one method	WP_085962374.1		GAS18_RS11600	2551065	2551601	-1	TlpA family protein disulfide reductase
Chr1	2551065	2564783	13718	Predicted by at least one method	WP_171466702.1		GAS18_RS11605	2551914	2552522	1	hypothetical protein
Chr1	2551065	2564783	13718	Predicted by at least one method			GAS18_RS11610	2552961	2553560	-1	ATP-binding protein
Chr1	2551065	2564783	13718	Predicted by at least one method	WP_216617149.1		GAS18_RS11615	2553742	2554815	1	tyrosine-type recombinase/integrase
Chr1	2551065	2564783	13718	Predicted by at least one method	WP_171466704.1		GAS18_RS11620	2554799	2556481	1	hypothetical protein
Chr1	2551065	2564783	13718	Predicted by at least one method	WP_171466705.1		GAS18_RS11625	2556745	2558316	1	site-specific integrase
Chr1	2551065	2564783	13718	Predicted by at least one method	WP_171466706.1		GAS18_RS11630	2558945	2559475	1	hypothetical protein
Chr1	2551065	2564783	13718	Predicted by at least one method	WP_216617150.1		GAS18_RS11635	2559656	2560474	1	metallophosphoesterase
Chr1	2551065	2564783	13718	Predicted by at least one method	WP_171466707.1		GAS18_RS11640	2560518	2561323	1	IS5 family transposase
Chr1	2551065	2564783	13718	Predicted by at least one method	WP_216617151.1		GAS18_RS11645	2561310	2561888	1	hypothetical protein
Chr1	2551065	2564783	13718	Predicted by at least one method	WP_171466708.1		GAS18_RS11650	2561888	2562916	1	hypothetical protein
Chr1	2551065	2564783	13718	Predicted by at least one method	WP_171466709.1		GAS18_RS11655	2562913	2563944	1	hypothetical protein
Chr1	2551065	2564783	13718	Predicted by at least one method	WP_171466710.1		GAS18_RS11660	2563941	2564783	1	hypothetical protein
Chr1	2553557	2578385	24828	Predicted by at least one method			GAS18_RS11610	2552961	2553560	-1	ATP-binding protein
Chr1	2553557	2578385	24828	Predicted by at least one method	WP_216617149.1		GAS18_RS11615	2553742	2554815	1	tyrosine-type recombinase/integrase
Chr1	2553557	2578385	24828	Predicted by at least one method	WP_171466704.1		GAS18_RS11620	2554799	2556481	1	hypothetical protein
Chr1	2553557	2578385	24828	Predicted by at least one method	WP_171466705.1		GAS18_RS11625	2556745	2558316	1	site-specific integrase
Chr1	2553557	2578385	24828	Predicted by at least one method	WP_171466706.1		GAS18_RS11630	2558945	2559475	1	hypothetical protein
Chr1	2553557	2578385	24828	Predicted by at least one method	WP_216617150.1		GAS18_RS11635	2559656	2560474	1	metallophosphoesterase
Chr1	2553557	2578385	24828	Predicted by at least one method	WP_171466707.1		GAS18_RS11640	2560518	2561323	1	IS5 family transposase
Chr1	2553557	2578385	24828	Predicted by at least one method	WP_216617151.1		GAS18_RS11645	2561310	2561888	1	hypothetical protein
Chr1	2553557	2578385	24828	Predicted by at least one method	WP_171466708.1		GAS18_RS11650	2561888	2562916	1	hypothetical protein
Chr1	2553557	2578385	24828	Predicted by at least one method	WP_171466709.1		GAS18_RS11655	2562913	2563944	1	hypothetical protein
Chr1	2553557	2578385	24828	Predicted by at least one method	WP_171466710.1		GAS18_RS11660	2563941	2564783	1	hypothetical protein
Chr1	2553557	2578385	24828	Predicted by at least one method	WP_171466711.1		GAS18_RS11665	2564788	2567418	1	hypothetical protein
Chr1	2553557	2578385	24828	Predicted by at least one method	WP_171466712.1		GAS18_RS11670	2567509	2567964	1	DUF2384 domain-containing protein
Chr1	2553557	2578385	24828	Predicted by at least one method	WP_171466713.1		GAS18_RS11675	2568155	2568550	1	hypothetical protein
Chr1	2553557	2578385	24828	Predicted by at least one method	WP_171466714.1		GAS18_RS11680	2568819	2571947	-1	AAA family ATPase
Chr1	2553557	2578385	24828	Predicted by at least one method	WP_171466715.1		GAS18_RS11685	2571947	2572591	-1	hypothetical protein
Chr1	2553557	2578385	24828	Predicted by at least one method	WP_171466716.1		GAS18_RS11690	2572588	2574948	-1	FAD-dependent oxidoreductase
Chr1	2553557	2578385	24828	Predicted by at least one method	WP_161521383.1		GAS18_RS11695	2575674	2576491	1	IS5 family transposase
Chr1	2553557	2578385	24828	Predicted by at least one method			GAS18_RS11700	2576729	2577104	1	DUF5594 family protein
Chr1	2553557	2578385	24828	Predicted by at least one method	WP_208452595.1		GAS18_RS11705	2577861	2578184	1	transposase
Chr1	2553557	2578385	24828	Predicted by at least one method			GAS18_RS11710	2578369	2579445	-1	ATP-binding protein
Chr1	3050329	3067476	17147	Predicted by at least one method	WP_124836263.1		GAS18_RS13830	3050329	3051699	-1	MFS transporter
Chr1	3050329	3067476	17147	Predicted by at least one method	WP_017923656.1		GAS18_RS13835	3051834	3052337	-1	YbhB/YbcL family Raf kinase inhibitor-like protein
Chr1	3050329	3067476	17147	Predicted by at least one method	WP_015876690.1		GAS18_RS13840	3052497	3052877	-1	DUF5594 family protein
Chr1	3050329	3067476	17147	Predicted by at least one method	WP_035981820.1		GAS18_RS13845	3053074	3053421	1	hypothetical protein
Chr1	3050329	3067476	17147	Predicted by at least one method	WP_216617152.1		GAS18_RS28620	3053673	3054092	-1	hypothetical protein
Chr1	3050329	3067476	17147	Predicted by at least one method	WP_015876687.1	eco	GAS18_RS13855	3054337	3054876	1	serine protease inhibitor ecotin
Chr1	3050329	3067476	17147	Predicted by at least one method	WP_124836340.1		GAS18_RS13860	3054914	3056044	-1	serine hydrolase
Chr1	3050329	3067476	17147	Predicted by at least one method	WP_015876685.1		GAS18_RS13865	3056199	3056408	-1	hypothetical protein
Chr1	3050329	3067476	17147	Predicted by at least one method	WP_017425492.1		GAS18_RS13870	3056530	3056799	-1	hypothetical protein
Chr1	3050329	3067476	17147	Predicted by at least one method	WP_017433131.1		GAS18_RS13875	3056911	3057291	1	DUF3592 domain-containing protein
Chr1	3050329	3067476	17147	Predicted by at least one method	WP_124836339.1		GAS18_RS13880	3057600	3057950	1	hypothetical protein
Chr1	3050329	3067476	17147	Predicted by at least one method	WP_124836262.1		GAS18_RS13885	3058048	3059706	-1	ABC transporter substrate-binding protein
Chr1	3050329	3067476	17147	Predicted by at least one method	WP_171466735.1		GAS18_RS13890	3060156	3061781	-1	hypothetical protein
Chr1	3050329	3067476	17147	Predicted by at least one method	WP_171466736.1		GAS18_RS13895	3062361	3062513	-1	integrase core domain-containing protein
Chr1	3050329	3067476	17147	Predicted by at least one method	WP_124836260.1		GAS18_RS13900	3062510	3062746	-1	DDE-type integrase/transposase/recombinase
Chr1	3050329	3067476	17147	Predicted by at least one method	WP_171466737.1		GAS18_RS13905	3062820	3063224	1	hypothetical protein
Chr1	3050329	3067476	17147	Predicted by at least one method			GAS18_RS13910	3063256	3064072	1	IS5 family transposase
Chr1	3050329	3067476	17147	Predicted by at least one method	WP_124837770.1		GAS18_RS13915	3064047	3064319	-1	transposase
Chr1	3050329	3067476	17147	Predicted by at least one method	WP_158335149.1		GAS18_RS13920	3064353	3064550	-1	DUF2778 domain-containing protein
Chr1	3050329	3067476	17147	Predicted by at least one method	WP_015876681.1		GAS18_RS13925	3064660	3064953	-1	hypothetical protein
Chr1	3050329	3067476	17147	Predicted by at least one method	WP_171466834.1		GAS18_RS13930	3064957	3065796	-1	hypothetical protein
Chr1	3050329	3067476	17147	Predicted by at least one method			GAS18_RS13935	3066306	3066566	-1	integrase
Chr1	3050329	3067476	17147	Predicted by at least one method	WP_085962346.1		GAS18_RS13940	3066659	3067476	1	IS5 family transposase
Chr1	3070475	3086664	16189	Predicted by at least one method	WP_171466738.1		GAS18_RS13955	3070965	3071819	-1	hypothetical protein
Chr1	3070475	3086664	16189	Predicted by at least one method	WP_171466739.1		GAS18_RS13960	3071954	3073155	-1	IS3 family transposase
Chr1	3070475	3086664	16189	Predicted by at least one method			GAS18_RS13965	3073598	3074693	1	IS5 family transposase
Chr1	3070475	3086664	16189	Predicted by at least one method	WP_171466740.1		GAS18_RS13970	3075111	3075329	1	hypothetical protein
Chr1	3070475	3086664	16189	Predicted by at least one method	WP_124837763.1		GAS18_RS13975	3075503	3075688	1	hypothetical protein
Chr1	3070475	3086664	16189	Predicted by at least one method	WP_017922831.1		GAS18_RS13980	3075877	3076110	1	DUF1902 domain-containing protein
Chr1	3070475	3086664	16189	Predicted by at least one method	WP_124837761.1		GAS18_RS13985	3076111	3076305	1	type II toxin-antitoxin system HicA family toxin
Chr1	3070475	3086664	16189	Predicted by at least one method	WP_171466741.1		GAS18_RS13990	3076413	3076889	1	AlpA family phage regulatory protein
Chr1	3070475	3086664	16189	Predicted by at least one method	WP_171466742.1		GAS18_RS13995	3077120	3077845	1	hypothetical protein
Chr1	3070475	3086664	16189	Predicted by at least one method	WP_123037047.1		GAS18_RS14000	3077884	3078852	-1	hypothetical protein
Chr1	3070475	3086664	16189	Predicted by at least one method	WP_171466743.1		GAS18_RS14005	3079214	3079576	1	hypothetical protein
Chr1	3070475	3086664	16189	Predicted by at least one method	WP_171466744.1		GAS18_RS14010	3079569	3079952	1	hypothetical protein
Chr1	3070475	3086664	16189	Predicted by at least one method	WP_171466745.1		GAS18_RS14015	3079945	3080268	1	hypothetical protein
Chr1	3070475	3086664	16189	Predicted by at least one method	WP_085962356.1		GAS18_RS14020	3080376	3081193	1	IS5-like element ISBugl2 family transposase
Chr1	3070475	3086664	16189	Predicted by at least one method	WP_171466746.1		GAS18_RS14025	3081372	3082079	1	hypothetical protein
Chr1	3070475	3086664	16189	Predicted by at least one method	WP_171466835.1		GAS18_RS14030	3082244	3082474	1	transcriptional regulator
Chr1	3070475	3086664	16189	Predicted by at least one method	WP_171466747.1		GAS18_RS14035	3082481	3082711	1	hypothetical protein
Chr1	3070475	3086664	16189	Predicted by at least one method	WP_171466748.1		GAS18_RS14040	3083043	3083300	1	hypothetical protein
Chr1	3070475	3086664	16189	Predicted by at least one method	WP_171466749.1		GAS18_RS14045	3083293	3084327	1	hypothetical protein
Chr1	3070475	3086664	16189	Predicted by at least one method			GAS18_RS14050	3084324	3085967	1	toprim domain-containing protein
Chr1	3070475	3086664	16189	Predicted by at least one method	WP_017424237.1		GAS18_RS14055	3086604	3087803	-1	integrase arm-type DNA-binding domain-containing protein
Chr1	3079569	3087803	8234	Predicted by at least one method	WP_171466743.1		GAS18_RS14005	3079214	3079576	1	hypothetical protein
Chr1	3079569	3087803	8234	Predicted by at least one method	WP_171466744.1		GAS18_RS14010	3079569	3079952	1	hypothetical protein
Chr1	3079569	3087803	8234	Predicted by at least one method	WP_171466745.1		GAS18_RS14015	3079945	3080268	1	hypothetical protein
Chr1	3079569	3087803	8234	Predicted by at least one method	WP_085962356.1		GAS18_RS14020	3080376	3081193	1	IS5-like element ISBugl2 family transposase
Chr1	3079569	3087803	8234	Predicted by at least one method	WP_171466746.1		GAS18_RS14025	3081372	3082079	1	hypothetical protein
Chr1	3079569	3087803	8234	Predicted by at least one method	WP_171466835.1		GAS18_RS14030	3082244	3082474	1	transcriptional regulator
Chr1	3079569	3087803	8234	Predicted by at least one method	WP_171466747.1		GAS18_RS14035	3082481	3082711	1	hypothetical protein
Chr1	3079569	3087803	8234	Predicted by at least one method	WP_171466748.1		GAS18_RS14040	3083043	3083300	1	hypothetical protein
Chr1	3079569	3087803	8234	Predicted by at least one method	WP_171466749.1		GAS18_RS14045	3083293	3084327	1	hypothetical protein
Chr1	3079569	3087803	8234	Predicted by at least one method			GAS18_RS14050	3084324	3085967	1	toprim domain-containing protein
Chr1	3079569	3087803	8234	Predicted by at least one method	WP_017424237.1		GAS18_RS14055	3086604	3087803	-1	integrase arm-type DNA-binding domain-containing protein
Chr1	3281618	3285814	4196	Predicted by at least one method	WP_015876473.1		GAS18_RS14915	3279752	3281713	1	methyl-accepting chemotaxis protein
Chr1	3281618	3285814	4196	Predicted by at least one method	WP_124836557.1		GAS18_RS14920	3281982	3283577	-1	ADP-ribosylglycohydrolase family protein
Chr1	3281618	3285814	4196	Predicted by at least one method	WP_081054161.1		GAS18_RS14925	3283577	3284239	-1	DarT ssDNA thymidine ADP-ribosyltransferase family protein
Chr1	3281618	3285814	4196	Predicted by at least one method	WP_124836558.1		GAS18_RS14930	3284236	3285630	-1	DNA helicase
Chr1	3311299	3315533	4234	Predicted by at least one method		hrpA	GAS18_RS15050	3311299	3315533	1	ATP-dependent RNA helicase HrpA
Chr1	3396714	3428300	31586	Predicted by at least one method	WP_043307866.1		GAS18_RS15420	3395477	3396730	-1	membrane protein
Chr1	3396714	3428300	31586	Predicted by at least one method	WP_171466758.1	mutS	GAS18_RS15425	3396714	3399410	-1	DNA mismatch repair protein MutS
Chr1	3396714	3428300	31586	Predicted by at least one method	WP_171466759.1		GAS18_RS15430	3399652	3401199	1	tyrosine-type recombinase/integrase
Chr1	3396714	3428300	31586	Predicted by at least one method	WP_171466760.1		GAS18_RS15435	3401309	3402223	1	hypothetical protein
Chr1	3396714	3428300	31586	Predicted by at least one method	WP_171466761.1		GAS18_RS15440	3402646	3403236	1	helix-turn-helix domain-containing protein
Chr1	3396714	3428300	31586	Predicted by at least one method	WP_171466762.1		GAS18_RS15445	3403441	3403662	1	hypothetical protein
Chr1	3396714	3428300	31586	Predicted by at least one method	WP_171466838.1		GAS18_RS15450	3404022	3404810	-1	topoisomerase DNA-binding C4 zinc finger domain-containing protein
Chr1	3396714	3428300	31586	Predicted by at least one method	WP_171466763.1		GAS18_RS15455	3406388	3407146	-1	protein phosphatase 2C domain-containing protein
Chr1	3396714	3428300	31586	Predicted by at least one method	WP_216617161.1		GAS18_RS15460	3407136	3407714	-1	VWA domain-containing protein
Chr1	3396714	3428300	31586	Predicted by at least one method	WP_171466765.1		GAS18_RS15465	3408041	3408262	-1	hypothetical protein
Chr1	3396714	3428300	31586	Predicted by at least one method	WP_171466766.1		GAS18_RS15470	3408606	3409403	-1	hypothetical protein
Chr1	3396714	3428300	31586	Predicted by at least one method	WP_171466767.1		GAS18_RS15475	3409591	3413031	-1	relaxase domain-containing protein
Chr1	3396714	3428300	31586	Predicted by at least one method	WP_171466768.1		GAS18_RS15480	3413051	3413473	-1	hypothetical protein
Chr1	3396714	3428300	31586	Predicted by at least one method	WP_171466769.1		GAS18_RS15485	3414070	3415143	1	site-specific integrase
Chr1	3396714	3428300	31586	Predicted by at least one method	WP_171466770.1		GAS18_RS15490	3415296	3415976	-1	hypothetical protein
Chr1	3396714	3428300	31586	Predicted by at least one method	WP_171466771.1		GAS18_RS15495	3416155	3418164	1	type IV secretion system DNA-binding domain-containing protein
Chr1	3396714	3428300	31586	Predicted by at least one method	WP_171466772.1		GAS18_RS15500	3418737	3419573	1	ankyrin repeat domain-containing protein
Chr1	3396714	3428300	31586	Predicted by at least one method	WP_171466773.1		GAS18_RS15505	3419906	3420277	-1	hypothetical protein
Chr1	3396714	3428300	31586	Predicted by at least one method	WP_171466839.1		GAS18_RS15510	3420359	3421495	-1	CAP domain-containing protein
Chr1	3396714	3428300	31586	Predicted by at least one method	WP_171466774.1		GAS18_RS15515	3421677	3422150	1	transcriptional regulator
Chr1	3396714	3428300	31586	Predicted by at least one method	WP_171466775.1		GAS18_RS15520	3422234	3422500	-1	hypothetical protein
Chr1	3396714	3428300	31586	Predicted by at least one method	WP_171466776.1		GAS18_RS15525	3422567	3423649	-1	DUF3396 domain-containing protein
Chr1	3396714	3428300	31586	Predicted by at least one method	WP_171466777.1		GAS18_RS15530	3423681	3424412	-1	VRR-NUC domain-containing protein
Chr1	3396714	3428300	31586	Predicted by at least one method	WP_171466778.1		GAS18_RS15535	3424409	3424954	-1	PAAR domain-containing protein
Chr1	3396714	3428300	31586	Predicted by at least one method	WP_171466840.1		GAS18_RS15540	3425246	3426208	1	DUF2971 domain-containing protein
Chr1	3396714	3428300	31586	Predicted by at least one method	WP_171466779.1		GAS18_RS15545	3426330	3426536	-1	hypothetical protein
Chr1	3396714	3428300	31586	Predicted by at least one method	WP_043227029.1		GAS18_RS15550	3427068	3428300	-1	EAL domain-containing protein
Chr1	3399350	3426364	27014	Predicted by at least one method	WP_171466758.1	mutS	GAS18_RS15425	3396714	3399410	-1	DNA mismatch repair protein MutS
Chr1	3399350	3426364	27014	Predicted by at least one method	WP_171466759.1		GAS18_RS15430	3399652	3401199	1	tyrosine-type recombinase/integrase
Chr1	3399350	3426364	27014	Predicted by at least one method	WP_171466760.1		GAS18_RS15435	3401309	3402223	1	hypothetical protein
Chr1	3399350	3426364	27014	Predicted by at least one method	WP_171466761.1		GAS18_RS15440	3402646	3403236	1	helix-turn-helix domain-containing protein
Chr1	3399350	3426364	27014	Predicted by at least one method	WP_171466762.1		GAS18_RS15445	3403441	3403662	1	hypothetical protein
Chr1	3399350	3426364	27014	Predicted by at least one method	WP_171466838.1		GAS18_RS15450	3404022	3404810	-1	topoisomerase DNA-binding C4 zinc finger domain-containing protein
Chr1	3399350	3426364	27014	Predicted by at least one method	WP_171466763.1		GAS18_RS15455	3406388	3407146	-1	protein phosphatase 2C domain-containing protein
Chr1	3399350	3426364	27014	Predicted by at least one method	WP_216617161.1		GAS18_RS15460	3407136	3407714	-1	VWA domain-containing protein
Chr1	3399350	3426364	27014	Predicted by at least one method	WP_171466765.1		GAS18_RS15465	3408041	3408262	-1	hypothetical protein
Chr1	3399350	3426364	27014	Predicted by at least one method	WP_171466766.1		GAS18_RS15470	3408606	3409403	-1	hypothetical protein
Chr1	3399350	3426364	27014	Predicted by at least one method	WP_171466767.1		GAS18_RS15475	3409591	3413031	-1	relaxase domain-containing protein
Chr1	3399350	3426364	27014	Predicted by at least one method	WP_171466768.1		GAS18_RS15480	3413051	3413473	-1	hypothetical protein
Chr1	3399350	3426364	27014	Predicted by at least one method	WP_171466769.1		GAS18_RS15485	3414070	3415143	1	site-specific integrase
Chr1	3399350	3426364	27014	Predicted by at least one method	WP_171466770.1		GAS18_RS15490	3415296	3415976	-1	hypothetical protein
Chr1	3399350	3426364	27014	Predicted by at least one method	WP_171466771.1		GAS18_RS15495	3416155	3418164	1	type IV secretion system DNA-binding domain-containing protein
Chr1	3399350	3426364	27014	Predicted by at least one method	WP_171466772.1		GAS18_RS15500	3418737	3419573	1	ankyrin repeat domain-containing protein
Chr1	3399350	3426364	27014	Predicted by at least one method	WP_171466773.1		GAS18_RS15505	3419906	3420277	-1	hypothetical protein
Chr1	3399350	3426364	27014	Predicted by at least one method	WP_171466839.1		GAS18_RS15510	3420359	3421495	-1	CAP domain-containing protein
Chr1	3399350	3426364	27014	Predicted by at least one method	WP_171466774.1		GAS18_RS15515	3421677	3422150	1	transcriptional regulator
Chr1	3399350	3426364	27014	Predicted by at least one method	WP_171466775.1		GAS18_RS15520	3422234	3422500	-1	hypothetical protein
Chr1	3399350	3426364	27014	Predicted by at least one method	WP_171466776.1		GAS18_RS15525	3422567	3423649	-1	DUF3396 domain-containing protein
Chr1	3399350	3426364	27014	Predicted by at least one method	WP_171466777.1		GAS18_RS15530	3423681	3424412	-1	VRR-NUC domain-containing protein
Chr1	3399350	3426364	27014	Predicted by at least one method	WP_171466778.1		GAS18_RS15535	3424409	3424954	-1	PAAR domain-containing protein
Chr1	3399350	3426364	27014	Predicted by at least one method	WP_171466840.1		GAS18_RS15540	3425246	3426208	1	DUF2971 domain-containing protein
Chr1	3399350	3426364	27014	Predicted by at least one method	WP_171466779.1		GAS18_RS15545	3426330	3426536	-1	hypothetical protein
Chr1	3404022	3420277	16255	Predicted by at least one method	WP_171466838.1		GAS18_RS15450	3404022	3404810	-1	topoisomerase DNA-binding C4 zinc finger domain-containing protein
Chr1	3404022	3420277	16255	Predicted by at least one method	WP_171466763.1		GAS18_RS15455	3406388	3407146	-1	protein phosphatase 2C domain-containing protein
Chr1	3404022	3420277	16255	Predicted by at least one method	WP_216617161.1		GAS18_RS15460	3407136	3407714	-1	VWA domain-containing protein
Chr1	3404022	3420277	16255	Predicted by at least one method	WP_171466765.1		GAS18_RS15465	3408041	3408262	-1	hypothetical protein
Chr1	3404022	3420277	16255	Predicted by at least one method	WP_171466766.1		GAS18_RS15470	3408606	3409403	-1	hypothetical protein
Chr1	3404022	3420277	16255	Predicted by at least one method	WP_171466767.1		GAS18_RS15475	3409591	3413031	-1	relaxase domain-containing protein
Chr1	3404022	3420277	16255	Predicted by at least one method	WP_171466768.1		GAS18_RS15480	3413051	3413473	-1	hypothetical protein
Chr1	3404022	3420277	16255	Predicted by at least one method	WP_171466769.1		GAS18_RS15485	3414070	3415143	1	site-specific integrase
Chr1	3404022	3420277	16255	Predicted by at least one method	WP_171466770.1		GAS18_RS15490	3415296	3415976	-1	hypothetical protein
Chr1	3404022	3420277	16255	Predicted by at least one method	WP_171466771.1		GAS18_RS15495	3416155	3418164	1	type IV secretion system DNA-binding domain-containing protein
Chr1	3404022	3420277	16255	Predicted by at least one method	WP_171466772.1		GAS18_RS15500	3418737	3419573	1	ankyrin repeat domain-containing protein
Chr1	3404022	3420277	16255	Predicted by at least one method	WP_171466773.1		GAS18_RS15505	3419906	3420277	-1	hypothetical protein
Chr1	3422567	3428300	5733	Predicted by at least one method	WP_171466776.1		GAS18_RS15525	3422567	3423649	-1	DUF3396 domain-containing protein
Chr1	3422567	3428300	5733	Predicted by at least one method	WP_171466777.1		GAS18_RS15530	3423681	3424412	-1	VRR-NUC domain-containing protein
Chr1	3422567	3428300	5733	Predicted by at least one method	WP_171466778.1		GAS18_RS15535	3424409	3424954	-1	PAAR domain-containing protein
Chr1	3422567	3428300	5733	Predicted by at least one method	WP_171466840.1		GAS18_RS15540	3425246	3426208	1	DUF2971 domain-containing protein
Chr1	3422567	3428300	5733	Predicted by at least one method	WP_171466779.1		GAS18_RS15545	3426330	3426536	-1	hypothetical protein
Chr1	3422567	3428300	5733	Predicted by at least one method	WP_043227029.1		GAS18_RS15550	3427068	3428300	-1	EAL domain-containing protein
Chr1	3434210	3441532	7322	Predicted by at least one method	WP_124836114.1		GAS18_RS15575	3434210	3435415	-1	IS110 family transposase
Chr1	3434210	3441532	7322	Predicted by at least one method	WP_015876326.1		GAS18_RS15580	3435919	3436539	1	HAD-IB family hydrolase
Chr1	3434210	3441532	7322	Predicted by at least one method		vgrG	GAS18_RS15585	3436676	3438651	1	type VI secretion system tip protein VgrG
Chr1	3434210	3441532	7322	Predicted by at least one method	WP_124837674.1		GAS18_RS15590	3438648	3440105	1	hypothetical protein
Chr1	3434210	3441532	7322	Predicted by at least one method	WP_039202447.1		GAS18_RS15595	3440102	3441172	1	hypothetical protein
Chr1	3434210	3441532	7322	Predicted by at least one method			GAS18_RS15600	3441214	3441532	-1	hypothetical protein
Chr1	3459233	3476146	16913	Predicted by at least one method	WP_171466616.1	tnpB	GAS18_RS15680	3459233	3459583	-1	IS66 family insertion sequence element accessory protein TnpB
Chr1	3459233	3476146	16913	Predicted by at least one method	WP_153479231.1		GAS18_RS15685	3459559	3460035	-1	transposase
Chr1	3459233	3476146	16913	Predicted by at least one method			GAS18_RS15690	3460123	3460527	1	transposase
Chr1	3459233	3476146	16913	Predicted by at least one method	WP_171466616.1	tnpB	GAS18_RS15695	3461704	3462054	1	IS66 family insertion sequence element accessory protein TnpB
Chr1	3459233	3476146	16913	Predicted by at least one method	WP_171466781.1		GAS18_RS15700	3462086	3463642	1	IS66 family transposase
Chr1	3459233	3476146	16913	Predicted by at least one method	WP_171466782.1		GAS18_RS15705	3463594	3465393	-1	ATP-dependent endonuclease
Chr1	3459233	3476146	16913	Predicted by at least one method	WP_171466783.1		GAS18_RS15710	3465542	3469786	-1	AAA family ATPase
Chr1	3459233	3476146	16913	Predicted by at least one method	WP_216617153.1		GAS18_RS15715	3469797	3470909	-1	site-specific DNA-methyltransferase
Chr1	3459233	3476146	16913	Predicted by at least one method	WP_171466785.1		GAS18_RS15720	3471306	3471881	-1	recombinase family protein
Chr1	3459233	3476146	16913	Predicted by at least one method	WP_171466786.1		GAS18_RS15725	3472110	3472913	-1	hypothetical protein
Chr1	3459233	3476146	16913	Predicted by at least one method	WP_171466787.1		GAS18_RS15730	3473095	3473952	1	hypothetical protein
Chr1	3459233	3476146	16913	Predicted by at least one method	WP_017423122.1		GAS18_RS15740	3474328	3474786	1	histidine phosphatase family protein
Chr1	3459233	3476146	16913	Predicted by at least one method	WP_012735241.1		GAS18_RS15745	3474938	3475756	1	GNAT family N-acetyltransferase
Chr1	3459233	3476146	16913	Predicted by at least one method	WP_012735242.1		GAS18_RS15750	3475958	3476146	1	hypothetical protein
Chr1	3463594	3473952	10358	Predicted by at least one method	WP_171466781.1		GAS18_RS15700	3462086	3463642	1	IS66 family transposase
Chr1	3463594	3473952	10358	Predicted by at least one method	WP_171466782.1		GAS18_RS15705	3463594	3465393	-1	ATP-dependent endonuclease
Chr1	3463594	3473952	10358	Predicted by at least one method	WP_171466783.1		GAS18_RS15710	3465542	3469786	-1	AAA family ATPase
Chr1	3463594	3473952	10358	Predicted by at least one method	WP_216617153.1		GAS18_RS15715	3469797	3470909	-1	site-specific DNA-methyltransferase
Chr1	3463594	3473952	10358	Predicted by at least one method	WP_171466785.1		GAS18_RS15720	3471306	3471881	-1	recombinase family protein
Chr1	3463594	3473952	10358	Predicted by at least one method	WP_171466786.1		GAS18_RS15725	3472110	3472913	-1	hypothetical protein
Chr1	3463594	3473952	10358	Predicted by at least one method	WP_171466787.1		GAS18_RS15730	3473095	3473952	1	hypothetical protein
Chr1	3463670	3474122	10452	Predicted by at least one method	WP_171466782.1		GAS18_RS15705	3463594	3465393	-1	ATP-dependent endonuclease
Chr1	3463670	3474122	10452	Predicted by at least one method	WP_171466783.1		GAS18_RS15710	3465542	3469786	-1	AAA family ATPase
Chr1	3463670	3474122	10452	Predicted by at least one method	WP_216617153.1		GAS18_RS15715	3469797	3470909	-1	site-specific DNA-methyltransferase
Chr1	3463670	3474122	10452	Predicted by at least one method	WP_171466785.1		GAS18_RS15720	3471306	3471881	-1	recombinase family protein
Chr1	3463670	3474122	10452	Predicted by at least one method	WP_171466786.1		GAS18_RS15725	3472110	3472913	-1	hypothetical protein
Chr1	3463670	3474122	10452	Predicted by at least one method	WP_171466787.1		GAS18_RS15730	3473095	3473952	1	hypothetical protein
Chr1	3490850	3500485	9635	Predicted by at least one method	WP_171466789.1	dsbG	GAS18_RS15835	3490850	3491716	1	thiol:disulfide interchange protein DsbG
Chr1	3490850	3500485	9635	Predicted by at least one method	WP_124837734.1		GAS18_RS15840	3491773	3492138	1	hypothetical protein
Chr1	3490850	3500485	9635	Predicted by at least one method			GAS18_RS15845	3492243	3493047	-1	IS5 family transposase
Chr1	3490850	3500485	9635	Predicted by at least one method	WP_124837738.1	msbA	GAS18_RS15850	3493557	3495308	1	lipid A export permease/ATP-binding protein MsbA
Chr1	3490850	3500485	9635	Predicted by at least one method	WP_171466790.1		GAS18_RS15855	3495767	3497233	-1	efflux transporter outer membrane subunit
Chr1	3490850	3500485	9635	Predicted by at least one method	WP_124837736.1		GAS18_RS15860	3497305	3499299	-1	MacB family efflux pump subunit
Chr1	3490850	3500485	9635	Predicted by at least one method	WP_017923683.1		GAS18_RS15865	3499304	3500485	-1	efflux RND transporter periplasmic adaptor subunit
Chr1	3500299	3505273	4974	Predicted by at least one method	WP_017923683.1		GAS18_RS15865	3499304	3500485	-1	efflux RND transporter periplasmic adaptor subunit
Chr1	3500299	3505273	4974	Predicted by at least one method	WP_171466791.1		GAS18_RS15870	3500885	3501931	-1	IS481 family transposase
Chr1	3500299	3505273	4974	Predicted by at least one method	WP_171466792.1		GAS18_RS15875	3502158	3502298	-1	hypothetical protein
Chr1	3500299	3505273	4974	Predicted by at least one method			GAS18_RS15880	3502471	3503275	-1	IS5 family transposase
Chr1	3500299	3505273	4974	Predicted by at least one method	WP_171466793.1		GAS18_RS15885	3503295	3503582	1	hypothetical protein
Chr1	3500299	3505273	4974	Predicted by at least one method	WP_124837865.1		GAS18_RS15890	3504108	3504839	1	LuxR C-terminal-related transcriptional regulator
Chr1	3500299	3505273	4974	Predicted by at least one method	WP_017425184.1		GAS18_RS15895	3504852	3505100	1	hypothetical protein
Chr1	3500299	3505273	4974	Predicted by at least one method			GAS18_RS15900	3505219	3509209	1	FAD/FMN-binding oxidoreductase
Chr1	3502158	3509626	7468	Predicted by at least one method	WP_171466792.1		GAS18_RS15875	3502158	3502298	-1	hypothetical protein
Chr1	3502158	3509626	7468	Predicted by at least one method			GAS18_RS15880	3502471	3503275	-1	IS5 family transposase
Chr1	3502158	3509626	7468	Predicted by at least one method	WP_171466793.1		GAS18_RS15885	3503295	3503582	1	hypothetical protein
Chr1	3502158	3509626	7468	Predicted by at least one method	WP_124837865.1		GAS18_RS15890	3504108	3504839	1	LuxR C-terminal-related transcriptional regulator
Chr1	3502158	3509626	7468	Predicted by at least one method	WP_017425184.1		GAS18_RS15895	3504852	3505100	1	hypothetical protein
Chr1	3502158	3509626	7468	Predicted by at least one method			GAS18_RS15900	3505219	3509209	1	FAD/FMN-binding oxidoreductase
Chr1	3502158	3509626	7468	Predicted by at least one method	WP_124836435.1		GAS18_RS15905	3509411	3509626	-1	hypothetical protein
Chr1	3510314	3525539	15225	Predicted by at least one method	WP_015876290.1		GAS18_RS15910	3509835	3510545	1	ABC transporter ATP-binding protein
Chr1	3510314	3525539	15225	Predicted by at least one method	WP_124836348.1		GAS18_RS15915	3510542	3511933	1	FtsX-like permease family protein
Chr1	3510314	3525539	15225	Predicted by at least one method	WP_035980681.1		GAS18_RS15920	3511995	3512432	1	FixH family protein
Chr1	3510314	3525539	15225	Predicted by at least one method	WP_124836349.1		GAS18_RS15925	3512492	3513625	1	DJ-1/PfpI family protein
Chr1	3510314	3525539	15225	Predicted by at least one method	WP_015876286.1		GAS18_RS15930	3513697	3514479	1	outer membrane lipoprotein-sorting protein
Chr1	3510314	3525539	15225	Predicted by at least one method	WP_171466794.1		GAS18_RS15935	3514476	3515753	1	hypothetical protein
Chr1	3510314	3525539	15225	Predicted by at least one method	WP_015876284.1		GAS18_RS15940	3515835	3516227	1	RidA family protein
Chr1	3510314	3525539	15225	Predicted by at least one method			GAS18_RS15945	3516246	3517567	-1	cytochrome-c peroxidase
Chr1	3510314	3525539	15225	Predicted by at least one method	WP_124836352.1		GAS18_RS15950	3517554	3518516	-1	amidohydrolase family protein
Chr1	3510314	3525539	15225	Predicted by at least one method	WP_015876281.1		GAS18_RS15955	3518513	3519175	-1	N-acetyltransferase
Chr1	3510314	3525539	15225	Predicted by at least one method	WP_015876280.1		GAS18_RS15960	3519189	3520214	-1	cysteine synthase family protein
Chr1	3510314	3525539	15225	Predicted by at least one method	WP_124836353.1		GAS18_RS15965	3520373	3522202	-1	alpha/beta hydrolase
Chr1	3510314	3525539	15225	Predicted by at least one method	WP_017924261.1		GAS18_RS15970	3522211	3522477	-1	acyl carrier protein
Chr1	3510314	3525539	15225	Predicted by at least one method	WP_015876278.1		GAS18_RS15975	3522648	3523394	1	iron-containing redox enzyme family protein
Chr1	3510314	3525539	15225	Predicted by at least one method	WP_171466795.1		GAS18_RS15980	3523408	3524919	1	AMP-binding protein
Chr1	3510314	3525539	15225	Predicted by at least one method	WP_124836354.1		GAS18_RS15985	3524984	3527236	1	AMP-binding protein
Chr2	299885	304185	4300	Predicted by at least one method	WP_015877379.1		GAS18_RS17045	299885	300382	-1	ProQ/FINO family protein
Chr2	299885	304185	4300	Predicted by at least one method	WP_015877380.1		GAS18_RS17050	300463	300960	-1	GNAT family N-acetyltransferase
Chr2	299885	304185	4300	Predicted by at least one method	WP_015877381.1		GAS18_RS17055	300957	301238	-1	DUF1778 domain-containing protein
Chr2	299885	304185	4300	Predicted by at least one method	WP_173941242.1		GAS18_RS17060	301235	301612	-1	hypothetical protein
Chr2	299885	304185	4300	Predicted by at least one method	WP_017432434.1		GAS18_RS17065	301695	302057	-1	hypothetical protein
Chr2	299885	304185	4300	Predicted by at least one method	WP_171466868.1		GAS18_RS17070	302066	303127	-1	RHS repeat-associated core domain-containing protein
Chr2	299885	304185	4300	Predicted by at least one method	WP_171466869.1		GAS18_RS17075	303237	303707	-1	SMI1/KNR4 family protein
Chr2	299885	304185	4300	Predicted by at least one method	WP_124837592.1		GAS18_RS17080	303817	304185	-1	hypothetical protein
Chr2	299885	304185	4300	Predicted by at least one method	WP_124837593.1		GAS18_RS17085	304182	308855	-1	DUF6531 domain-containing protein
Chr2	310134	316881	6747	Predicted by at least one method	WP_080630155.1		GAS18_RS17095	310134	311981	-1	peptidase C11
Chr2	310134	316881	6747	Predicted by at least one method	WP_017922729.1		GAS18_RS17100	312499	313068	-1	hypothetical protein
Chr2	310134	316881	6747	Predicted by at least one method	WP_124837594.1		GAS18_RS17105	313086	314330	-1	MFS transporter
Chr2	310134	316881	6747	Predicted by at least one method	WP_017423686.1		GAS18_RS17110	314327	315100	-1	hypothetical protein
Chr2	310134	316881	6747	Predicted by at least one method			GAS18_RS17115	315558	315855	1	hypothetical protein
Chr2	310134	316881	6747	Predicted by at least one method	WP_015877387.1		GAS18_RS17120	315927	316124	1	hypothetical protein
Chr2	310134	316881	6747	Predicted by at least one method	WP_124837595.1		GAS18_RS17125	316693	316881	1	hypothetical protein
Chr2	600720	615697	14977	Predicted by at least one method	WP_015877608.1		GAS18_RS18365	600720	601157	1	helix-turn-helix transcriptional regulator
Chr2	600720	615697	14977	Predicted by at least one method	WP_015877609.1		GAS18_RS18370	601578	602174	1	DUF1007 family protein
Chr2	600720	615697	14977	Predicted by at least one method	WP_124837606.1		GAS18_RS18375	602168	603289	1	high frequency lysogenization protein HflD
Chr2	600720	615697	14977	Predicted by at least one method	WP_153479032.1		GAS18_RS18380	603365	603670	1	hypothetical protein
Chr2	600720	615697	14977	Predicted by at least one method	WP_015877611.1	trxA	GAS18_RS18385	603700	604938	-1	thioredoxin
Chr2	600720	615697	14977	Predicted by at least one method			GAS18_RS18390	605018	605855	-1	ATP-binding cassette domain-containing protein
Chr2	600720	615697	14977	Predicted by at least one method	WP_080630264.1		GAS18_RS18395	607143	607829	-1	class I SAM-dependent methyltransferase
Chr2	600720	615697	14977	Predicted by at least one method			GAS18_RS28635	608331	608426	1	transposase
Chr2	600720	615697	14977	Predicted by at least one method	WP_017423816.1		GAS18_RS18400	608567	609076	-1	dihydrofolate reductase
Chr2	600720	615697	14977	Predicted by at least one method	WP_080630169.1		GAS18_RS18405	609233	609727	1	GNAT family N-acetyltransferase
Chr2	600720	615697	14977	Predicted by at least one method			GAS18_RS18410	609850	610468	1	tyrosine-type recombinase/integrase
Chr2	600720	615697	14977	Predicted by at least one method	WP_171466885.1		GAS18_RS18415	610678	611409	-1	GNAT family N-acetyltransferase
Chr2	600720	615697	14977	Predicted by at least one method	WP_012733511.1		GAS18_RS18420	611811	612035	1	DUF4260 family protein
Chr2	600720	615697	14977	Predicted by at least one method		trpS	GAS18_RS18425	612231	612983	1	tryptophan--tRNA ligase
Chr2	600720	615697	14977	Predicted by at least one method	WP_085962362.1		GAS18_RS18430	612995	613812	-1	IS5-like element ISBugl2 family transposase
Chr2	600720	615697	14977	Predicted by at least one method			GAS18_RS18435	613898	614170	1	tryptophan--tRNA ligase
Chr2	600720	615697	14977	Predicted by at least one method	WP_216617167.1		GAS18_RS18440	614282	614626	-1	hypothetical protein
Chr2	600720	615697	14977	Predicted by at least one method	WP_012733509.1	speD	GAS18_RS18445	615305	615697	1	adenosylmethionine decarboxylase
Chr2	630737	647732	16995	Predicted by at least one method	WP_012733494.1		GAS18_RS18540	630737	631486	-1	FkbM family methyltransferase
Chr2	630737	647732	16995	Predicted by at least one method	WP_171466888.1		GAS18_RS18545	632295	632750	1	NUDIX domain-containing protein
Chr2	630737	647732	16995	Predicted by at least one method	WP_171466889.1		GAS18_RS18550	633263	633589	-1	transposase
Chr2	630737	647732	16995	Predicted by at least one method	WP_171466890.1		GAS18_RS18555	633703	634272	-1	hypothetical protein
Chr2	630737	647732	16995	Predicted by at least one method			GAS18_RS18560	634433	635529	1	IS5 family transposase
Chr2	630737	647732	16995	Predicted by at least one method	WP_171466891.1		GAS18_RS18565	635558	635905	-1	hypothetical protein
Chr2	630737	647732	16995	Predicted by at least one method	WP_124837821.1		GAS18_RS18570	635986	637716	-1	hypothetical protein
Chr2	630737	647732	16995	Predicted by at least one method	WP_012733489.1		GAS18_RS18575	637713	640391	-1	type VI secretion system tip protein VgrG
Chr2	630737	647732	16995	Predicted by at least one method			GAS18_RS18580	640728	640973	-1	DDE-type integrase/transposase/recombinase
Chr2	630737	647732	16995	Predicted by at least one method			GAS18_RS18585	640973	641311	1	DUF3560 domain-containing protein
Chr2	630737	647732	16995	Predicted by at least one method			GAS18_RS18590	641380	642470	1	IS5 family transposase
Chr2	630737	647732	16995	Predicted by at least one method	WP_012733487.1		GAS18_RS18595	643589	643855	-1	DUF333 domain-containing protein
Chr2	630737	647732	16995	Predicted by at least one method			GAS18_RS18600	643961	644140	-1	integrase
Chr2	630737	647732	16995	Predicted by at least one method	WP_012733486.1		GAS18_RS18605	644550	645317	1	coniferyl-alcohol dehydrogenase
Chr2	630737	647732	16995	Predicted by at least one method	WP_012733485.1		GAS18_RS18610	645355	646827	1	benzaldehyde dehydrogenase
Chr2	630737	647732	16995	Predicted by at least one method	WP_012733484.1		GAS18_RS18615	646899	647732	1	p-hydroxycinnamoyl CoA hydratase/lyase
Chr2	653691	658368	4677	Predicted by at least one method	WP_012733479.1		GAS18_RS18640	653691	654122	-1	hypothetical protein
Chr2	653691	658368	4677	Predicted by at least one method	WP_124837124.1		GAS18_RS18645	654260	655735	-1	hypothetical protein
Chr2	653691	658368	4677	Predicted by at least one method	WP_012733477.1		GAS18_RS18650	656063	657208	-1	LuxR C-terminal-related transcriptional regulator
Chr2	653691	658368	4677	Predicted by at least one method	WP_017432860.1		GAS18_RS18655	658231	658368	1	hypothetical protein
Chr2	759077	764836	5759	Predicted by at least one method	WP_017424744.1		GAS18_RS19080	759077	760864	-1	alpha-L-fucosidase
Chr2	759077	764836	5759	Predicted by at least one method	WP_012733383.1		GAS18_RS19085	762347	762688	-1	HdeA family protein
Chr2	759077	764836	5759	Predicted by at least one method	WP_012733382.1		GAS18_RS19090	763083	764093	1	dienelactone hydrolase family protein
Chr2	759077	764836	5759	Predicted by at least one method	WP_012733381.1		GAS18_RS19095	764612	764836	-1	DUF2934 domain-containing protein
Chr2	771281	777509	6228	Predicted by at least one method	WP_171466707.1		GAS18_RS19120	771281	772086	1	IS5 family transposase
Chr2	771281	777509	6228	Predicted by at least one method	WP_155296962.1		GAS18_RS19125	772679	772819	1	hypothetical protein
Chr2	771281	777509	6228	Predicted by at least one method			GAS18_RS28640	772936	774461	1	methyl-accepting chemotaxis protein
Chr2	771281	777509	6228	Predicted by at least one method	WP_017424604.1		GAS18_RS19140	774806	775159	-1	STN domain-containing protein
Chr2	771281	777509	6228	Predicted by at least one method	WP_017424605.1		GAS18_RS19145	775641	776414	-1	hypothetical protein
Chr2	771281	777509	6228	Predicted by at least one method	WP_127913868.1		GAS18_RS19150	777294	777509	-1	hypothetical protein
Chr2	850895	857593	6698	Predicted by at least one method	WP_171467023.1		GAS18_RS19485	850895	857593	1	YadA-like family protein
Chr2	850895	857593	6698	Predicted by at least one method	WP_035984171.1		GAS18_RS19490	857590	858735	1	DUF2827 domain-containing protein
Chr2	886080	891170	5090	Predicted by at least one method			GAS18_RS19605	885758	886286	1	hypothetical protein
Chr2	886080	891170	5090	Predicted by at least one method	WP_124837673.1		GAS18_RS19610	886700	889669	1	AAA family ATPase
Chr2	886080	891170	5090	Predicted by at least one method			GAS18_RS19615	889676	890044	-1	transposase
Chr2	886080	891170	5090	Predicted by at least one method	WP_171466903.1		GAS18_RS19620	890285	890629	1	hypothetical protein
Chr2	886080	891170	5090	Predicted by at least one method			GAS18_RS19625	890629	891395	1	IS6 family transposase
Chr2	946368	952540	6172	Predicted by at least one method	WP_124837460.1		GAS18_RS19845	946368	946610	-1	DUF3717 domain-containing protein
Chr2	946368	952540	6172	Predicted by at least one method	WP_171466905.1		GAS18_RS19870	952334	952540	1	hypothetical protein
Chr2	1164567	1180221	15654	Predicted by at least one method	WP_012733088.1		GAS18_RS20770	1164567	1164824	-1	PAAR domain-containing protein
Chr2	1164567	1180221	15654	Predicted by at least one method	WP_169511371.1		GAS18_RS20775	1164912	1166483	-1	PAAR domain-containing protein
Chr2	1164567	1180221	15654	Predicted by at least one method			GAS18_RS20780	1166536	1166879	-1	hypothetical protein
Chr2	1164567	1180221	15654	Predicted by at least one method	WP_171466707.1		GAS18_RS20785	1166888	1167693	-1	IS5 family transposase
Chr2	1164567	1180221	15654	Predicted by at least one method			GAS18_RS20790	1167748	1168191	-1	DUF3304 domain-containing protein
Chr2	1164567	1180221	15654	Predicted by at least one method	WP_171467026.1		GAS18_RS20795	1168194	1169174	-1	DUF4123 domain-containing protein
Chr2	1164567	1180221	15654	Predicted by at least one method		vgrG	GAS18_RS20800	1169174	1171524	-1	type VI secretion system tip protein VgrG
Chr2	1164567	1180221	15654	Predicted by at least one method		tssC	GAS18_RS20805	1171622	1173153	-1	type VI secretion system contractile sheath large subunit
Chr2	1164567	1180221	15654	Predicted by at least one method	WP_171466913.1	tssB	GAS18_RS20810	1173150	1173707	-1	type VI secretion system contractile sheath small subunit
Chr2	1164567	1180221	15654	Predicted by at least one method		tssK	GAS18_RS20815	1174258	1174527	1	type VI secretion system baseplate subunit TssK
Chr2	1164567	1180221	15654	Predicted by at least one method	WP_171466914.1		GAS18_RS20820	1174583	1174801	1	transposase
Chr2	1164567	1180221	15654	Predicted by at least one method			GAS18_RS20825	1175332	1176974	-1	MCP four helix bundle domain-containing protein
Chr2	1164567	1180221	15654	Predicted by at least one method	WP_012733079.1		GAS18_RS20830	1177746	1178426	1	YfdX family protein
Chr2	1164567	1180221	15654	Predicted by at least one method	WP_012733078.1		GAS18_RS20835	1178630	1179049	1	phosphate-starvation-inducible PsiE family protein
Chr2	1164567	1180221	15654	Predicted by at least one method	WP_017424503.1		GAS18_RS20840	1179153	1179560	-1	hypothetical protein
Chr2	1164567	1180221	15654	Predicted by at least one method	WP_124837577.1		GAS18_RS20845	1179730	1180221	1	low affinity iron permease family protein
Chr2	1174583	1179560	4977	Predicted by at least one method	WP_171466914.1		GAS18_RS20820	1174583	1174801	1	transposase
Chr2	1174583	1179560	4977	Predicted by at least one method			GAS18_RS20825	1175332	1176974	-1	MCP four helix bundle domain-containing protein
Chr2	1174583	1179560	4977	Predicted by at least one method	WP_012733079.1		GAS18_RS20830	1177746	1178426	1	YfdX family protein
Chr2	1174583	1179560	4977	Predicted by at least one method	WP_012733078.1		GAS18_RS20835	1178630	1179049	1	phosphate-starvation-inducible PsiE family protein
Chr2	1174583	1179560	4977	Predicted by at least one method	WP_017424503.1		GAS18_RS20840	1179153	1179560	-1	hypothetical protein
Chr2	1236983	1245053	8070	Predicted by at least one method	WP_017423261.1		GAS18_RS21060	1236983	1237762	-1	fimbria/pilus periplasmic chaperone
Chr2	1236983	1245053	8070	Predicted by at least one method	WP_017423260.1		GAS18_RS21065	1237858	1238406	-1	type 1 fimbrial protein
Chr2	1236983	1245053	8070	Predicted by at least one method	WP_017423259.1	poxB	GAS18_RS21070	1239507	1241231	-1	ubiquinone-dependent pyruvate dehydrogenase
Chr2	1236983	1245053	8070	Predicted by at least one method	WP_017423258.1	lldD	GAS18_RS21075	1241228	1242391	-1	FMN-dependent L-lactate dehydrogenase LldD
Chr2	1236983	1245053	8070	Predicted by at least one method			GAS18_RS21080	1242388	1243151	-1	GntR family transcriptional regulator
Chr2	1236983	1245053	8070	Predicted by at least one method	WP_012733017.1		GAS18_RS21085	1243640	1244389	-1	class I SAM-dependent methyltransferase
Chr2	1236983	1245053	8070	Predicted by at least one method	WP_017922618.1		GAS18_RS21090	1244532	1245053	-1	GNAT family N-acetyltransferase
Chr2	1374812	1386607	11795	Predicted by at least one method	WP_012732903.1		GAS18_RS21675	1374812	1376011	-1	glycine C-acetyltransferase
Chr2	1374812	1386607	11795	Predicted by at least one method	WP_012732902.1		GAS18_RS21680	1376173	1376778	1	XRE family transcriptional regulator
Chr2	1374812	1386607	11795	Predicted by at least one method	WP_012732901.1		GAS18_RS21685	1376891	1377277	1	DUF2471 family protein
Chr2	1374812	1386607	11795	Predicted by at least one method	WP_017424486.1		GAS18_RS21690	1377403	1378446	1	tyrosine-type recombinase/integrase
Chr2	1374812	1386607	11795	Predicted by at least one method	WP_012732899.1		GAS18_RS21695	1378531	1379730	-1	DNA-binding protein
Chr2	1374812	1386607	11795	Predicted by at least one method	WP_012732898.1		GAS18_RS21700	1382139	1383518	1	RepB family plasmid replication initiator protein
Chr2	1374812	1386607	11795	Predicted by at least one method	WP_012732897.1		GAS18_RS21705	1383875	1384924	-1	ParB/RepB/Spo0J family partition protein
Chr2	1374812	1386607	11795	Predicted by at least one method	WP_012732896.1		GAS18_RS21710	1384949	1385611	-1	AAA family ATPase
Chr2	1374812	1386607	11795	Predicted by at least one method	WP_035979475.1	arsC	GAS18_RS21715	1386242	1386607	1	arsenate reductase (glutaredoxin)
Chr2	1584606	1608357	23751	Predicted by at least one method	WP_015878087.1		GAS18_RS22495	1584606	1585523	1	LysR family transcriptional regulator
Chr2	1584606	1608357	23751	Predicted by at least one method	WP_017424327.1		GAS18_RS22500	1585590	1585832	-1	hypothetical protein
Chr2	1584606	1608357	23751	Predicted by at least one method	WP_124836642.1		GAS18_RS22505	1586320	1586763	1	Hsp20/alpha crystallin family protein
Chr2	1584606	1608357	23751	Predicted by at least one method	WP_015878085.1		GAS18_RS22510	1586792	1587199	1	Hsp20/alpha crystallin family protein
Chr2	1584606	1608357	23751	Predicted by at least one method	WP_015878084.1		GAS18_RS22515	1587282	1587845	1	Hsp20/alpha crystallin family protein
Chr2	1584606	1608357	23751	Predicted by at least one method	WP_124836641.1		GAS18_RS22520	1587888	1588325	1	hypothetical protein
Chr2	1584606	1608357	23751	Predicted by at least one method	WP_015878083.1		GAS18_RS22525	1588915	1589988	1	carotenoid 1,2-hydratase
Chr2	1584606	1608357	23751	Predicted by at least one method	WP_015878082.1		GAS18_RS22530	1590083	1591144	1	carotenoid 1,2-hydratase
Chr2	1584606	1608357	23751	Predicted by at least one method	WP_124836640.1		GAS18_RS22535	1591397	1593373	-1	alpha-galactosidase
Chr2	1584606	1608357	23751	Predicted by at least one method			GAS18_RS22540	1594134	1594454	-1	hypothetical protein
Chr2	1584606	1608357	23751	Predicted by at least one method	WP_124836639.1		GAS18_RS22545	1595059	1596645	1	MCP four helix bundle domain-containing protein
Chr2	1584606	1608357	23751	Predicted by at least one method	WP_171466941.1		GAS18_RS22550	1596664	1597469	-1	IS5 family transposase
Chr2	1584606	1608357	23751	Predicted by at least one method			GAS18_RS22555	1597671	1599665	-1	response regulator
Chr2	1584606	1608357	23751	Predicted by at least one method	WP_159372690.1		GAS18_RS22560	1599752	1600569	1	IS5-like element ISBugl2 family transposase
Chr2	1584606	1608357	23751	Predicted by at least one method			GAS18_RS22565	1600588	1601387	-1	IS5 family transposase
Chr2	1584606	1608357	23751	Predicted by at least one method	WP_124837548.1		GAS18_RS22570	1601597	1602352	-1	hypothetical protein
Chr2	1584606	1608357	23751	Predicted by at least one method			GAS18_RS22575	1603194	1603684	1	DDE-type integrase/transposase/recombinase
Chr2	1584606	1608357	23751	Predicted by at least one method	WP_171466841.1		GAS18_RS22580	1603776	1604093	1	hypothetical protein
Chr2	1584606	1608357	23751	Predicted by at least one method	WP_171466707.1		GAS18_RS22585	1604090	1604895	-1	IS5 family transposase
Chr2	1584606	1608357	23751	Predicted by at least one method	WP_015878079.1	gspI	GAS18_RS22590	1605035	1605484	-1	type II secretion system minor pseudopilin GspI
Chr2	1584606	1608357	23751	Predicted by at least one method	WP_063823511.1		GAS18_RS22595	1605630	1606307	-1	hypothetical protein
Chr2	1584606	1608357	23751	Predicted by at least one method	WP_124837546.1		GAS18_RS22600	1607836	1608357	1	chemotaxis protein CheW
Chr2	1591178	1596422	5244	Predicted by at least one method	WP_124836640.1		GAS18_RS22535	1591397	1593373	-1	alpha-galactosidase
Chr2	1591178	1596422	5244	Predicted by at least one method			GAS18_RS22540	1594134	1594454	-1	hypothetical protein
Chr2	1591178	1596422	5244	Predicted by at least one method	WP_124836639.1		GAS18_RS22545	1595059	1596645	1	MCP four helix bundle domain-containing protein
Chr2	1671300	1677449	6149	Predicted by at least one method	WP_124836617.1		GAS18_RS22895	1671300	1672040	1	hypothetical protein
Chr2	1671300	1677449	6149	Predicted by at least one method			GAS18_RS22900	1672662	1673758	-1	IS5 family transposase
Chr2	1671300	1677449	6149	Predicted by at least one method	WP_124836637.1		GAS18_RS22905	1674131	1674454	1	hypothetical protein
Chr2	1671300	1677449	6149	Predicted by at least one method	WP_080569427.1		GAS18_RS22910	1675063	1676067	1	LysR family transcriptional regulator
Chr2	1671300	1677449	6149	Predicted by at least one method	WP_088499518.1		GAS18_RS22915	1676781	1676975	1	LuxR C-terminal-related transcriptional regulator
Chr2	1671300	1677449	6149	Predicted by at least one method	WP_015878020.1		GAS18_RS22920	1677012	1677449	-1	acyl-CoA thioesterase
Chr2	1932070	1955099	23029	Predicted by at least one method	WP_015877814.1		GAS18_RS24065	1932070	1932435	-1	DUF3564 domain-containing protein
Chr2	1932070	1955099	23029	Predicted by at least one method	WP_015877813.1		GAS18_RS24070	1932663	1933937	1	SfnB family sulfur acquisition oxidoreductase
Chr2	1932070	1955099	23029	Predicted by at least one method	WP_017922542.1	hpaR	GAS18_RS24075	1934102	1934542	-1	homoprotocatechuate degradation operon regulator HpaR
Chr2	1932070	1955099	23029	Predicted by at least one method	WP_015877811.1		GAS18_RS24080	1934919	1935788	-1	MOSC N-terminal beta barrel domain-containing protein
Chr2	1932070	1955099	23029	Predicted by at least one method			GAS18_RS24085	1935907	1936101	-1	class II aldolase/adducin family protein
Chr2	1932070	1955099	23029	Predicted by at least one method	WP_171466971.1	bcpA	GAS18_RS24090	1936467	1945922	1	contact-dependent inhibition toxin BcpA
Chr2	1932070	1955099	23029	Predicted by at least one method	WP_171466972.1		GAS18_RS24095	1945932	1946744	1	immunity 49 family protein
Chr2	1932070	1955099	23029	Predicted by at least one method	WP_171466707.1		GAS18_RS24100	1946788	1947593	1	IS5 family transposase
Chr2	1932070	1955099	23029	Predicted by at least one method	WP_017432165.1	bcpO	GAS18_RS24105	1947638	1947862	1	CDI system lipoprotein BcpO
Chr2	1932070	1955099	23029	Predicted by at least one method			GAS18_RS24110	1947931	1948479	-1	DDE-type integrase/transposase/recombinase
Chr2	1932070	1955099	23029	Predicted by at least one method	WP_124837806.1		GAS18_RS24115	1948764	1949246	1	hypothetical protein
Chr2	1932070	1955099	23029	Predicted by at least one method	WP_015877807.1		GAS18_RS24120	1949293	1949496	1	hypothetical protein
Chr2	1932070	1955099	23029	Predicted by at least one method	WP_124837808.1		GAS18_RS24125	1949555	1951294	1	ShlB/FhaC/HecB family hemolysin secretion/activation protein
Chr2	1932070	1955099	23029	Predicted by at least one method			GAS18_RS24130	1951356	1952065	1	DUF746 domain-containing protein
Chr2	1932070	1955099	23029	Predicted by at least one method	WP_085962346.1		GAS18_RS24135	1952335	1953152	1	IS5 family transposase
Chr2	1932070	1955099	23029	Predicted by at least one method	WP_017423485.1		GAS18_RS24140	1953178	1953864	1	CsgG/HfaB family protein
Chr2	1932070	1955099	23029	Predicted by at least one method	WP_124837511.1		GAS18_RS24145	1953915	1954400	1	DUF4810 domain-containing protein
Chr2	1932070	1955099	23029	Predicted by at least one method	WP_015877803.1		GAS18_RS24150	1954413	1955099	1	DUF799 domain-containing protein
Chr2	1951356	1956327	4971	Predicted by at least one method			GAS18_RS24130	1951356	1952065	1	DUF746 domain-containing protein
Chr2	1951356	1956327	4971	Predicted by at least one method	WP_085962346.1		GAS18_RS24135	1952335	1953152	1	IS5 family transposase
Chr2	1951356	1956327	4971	Predicted by at least one method	WP_017423485.1		GAS18_RS24140	1953178	1953864	1	CsgG/HfaB family protein
Chr2	1951356	1956327	4971	Predicted by at least one method	WP_124837511.1		GAS18_RS24145	1953915	1954400	1	DUF4810 domain-containing protein
Chr2	1951356	1956327	4971	Predicted by at least one method	WP_015877803.1		GAS18_RS24150	1954413	1955099	1	DUF799 domain-containing protein
Chr2	1951356	1956327	4971	Predicted by at least one method	WP_017423488.1		GAS18_RS24155	1955185	1955622	1	IS5/IS1182 family transposase
Chr2	1951356	1956327	4971	Predicted by at least one method			GAS18_RS24160	1955650	1956327	-1	LysR family transcriptional regulator
Chr2	2163969	2182751	18782	Predicted by at least one method	WP_015877621.1	tsaD	GAS18_RS25125	2163969	2165009	-1	tRNA (adenosine(37)-N6)-threonylcarbamoyltransferase complex transferase subunit TsaD
Chr2	2163969	2182751	18782	Predicted by at least one method	WP_124837506.1		GAS18_RS25130	2165239	2166456	1	NAD(P)/FAD-dependent oxidoreductase
Chr2	2163969	2182751	18782	Predicted by at least one method	WP_006479415.1	rpsU	GAS18_RS25135	2166535	2166747	1	30S ribosomal protein S21
Chr2	2163969	2182751	18782	Predicted by at least one method	WP_015877618.1		GAS18_RS25140	2166932	2167378	1	GatB/YqeY domain-containing protein
Chr2	2163969	2182751	18782	Predicted by at least one method	WP_015877617.1	dnaG	GAS18_RS25145	2167431	2169317	1	DNA primase
Chr2	2163969	2182751	18782	Predicted by at least one method	WP_015877616.1	rpoD	GAS18_RS25150	2169447	2171864	1	RNA polymerase sigma factor RpoD
Chr2	2163969	2182751	18782	Predicted by at least one method			GAS18_RS25160	2172204	2172459	-1	PAAR domain-containing protein
Chr2	2163969	2182751	18782	Predicted by at least one method	WP_124837507.1		GAS18_RS25165	2172480	2173010	-1	hypothetical protein
Chr2	2163969	2182751	18782	Predicted by at least one method			GAS18_RS25170	2173084	2173389	1	transposase
Chr2	2163969	2182751	18782	Predicted by at least one method	WP_124837508.1		GAS18_RS25175	2173399	2173980	-1	hypothetical protein
Chr2	2163969	2182751	18782	Predicted by at least one method			GAS18_RS25180	2173952	2175388	-1	cell wall hydrolase
Chr2	2163969	2182751	18782	Predicted by at least one method	WP_085962356.1		GAS18_RS25185	2175473	2176290	1	IS5-like element ISBugl2 family transposase
Chr2	2163969	2182751	18782	Predicted by at least one method			GAS18_RS25190	2176299	2177603	-1	SH3 domain-containing protein
Chr2	2163969	2182751	18782	Predicted by at least one method	WP_171466980.1		GAS18_RS25195	2177656	2180163	-1	type VI secretion system tip protein VgrG
Chr2	2163969	2182751	18782	Predicted by at least one method	WP_017424264.1		GAS18_RS25200	2180479	2180667	1	hypothetical protein
Chr2	2163969	2182751	18782	Predicted by at least one method	WP_012733515.1		GAS18_RS25205	2181439	2181687	-1	hypothetical protein
Chr2	2163969	2182751	18782	Predicted by at least one method	WP_124836980.1		GAS18_RS25210	2181747	2182751	-1	hypothetical protein
Chr2	2229168	2237942	8774	Predicted by at least one method	WP_124836943.1		GAS18_RS25445	2228862	2229821	1	transglutaminase domain-containing protein
Chr2	2229168	2237942	8774	Predicted by at least one method	WP_124836942.1		GAS18_RS25450	2229870	2230613	1	SDR family oxidoreductase
Chr2	2229168	2237942	8774	Predicted by at least one method	WP_216617164.1		GAS18_RS25455	2230616	2231476	1	ROK family protein
Chr2	2229168	2237942	8774	Predicted by at least one method	WP_171466988.1		GAS18_RS25460	2231644	2232306	1	4'-phosphopantetheinyl transferase superfamily protein
Chr2	2229168	2237942	8774	Predicted by at least one method	WP_124836939.1		GAS18_RS25465	2232303	2233412	1	HlyD family secretion protein
Chr2	2229168	2237942	8774	Predicted by at least one method	WP_124836938.1		GAS18_RS25470	2233424	2235016	1	DHA2 family efflux MFS transporter permease subunit
Chr2	2229168	2237942	8774	Predicted by at least one method	WP_124836937.1		GAS18_RS25475	2235146	2236555	1	efflux transporter outer membrane subunit
Chr2	2229168	2237942	8774	Predicted by at least one method	WP_216617165.1	cysC	GAS18_RS25480	2236639	2237244	1	adenylyl-sulfate kinase
Chr2	2229168	2237942	8774	Predicted by at least one method	WP_124836936.1		GAS18_RS25485	2237286	2237996	-1	alpha/beta hydrolase
Chr2	2229168	2237942	8774	Predicted by at least one method			GAS18_RS25490	2237923	2238447	1	hybrid sensor histidine kinase/response regulator
Chr2	2443095	2458012	14917	Predicted by at least one method	WP_157808642.1		GAS18_RS26295	2443095	2443238	1	hypothetical protein
Chr2	2443095	2458012	14917	Predicted by at least one method	WP_017423242.1		GAS18_RS26300	2443667	2444836	-1	type 1 fimbrial protein
Chr2	2443095	2458012	14917	Predicted by at least one method			GAS18_RS26305	2444923	2447470	-1	fimbrial biogenesis outer membrane usher protein
Chr2	2443095	2458012	14917	Predicted by at least one method	WP_124837869.1		GAS18_RS26310	2447562	2448386	-1	fimbria/pilus periplasmic chaperone
Chr2	2443095	2458012	14917	Predicted by at least one method	WP_124837867.1		GAS18_RS26315	2448415	2448975	-1	type 1 fimbrial protein
Chr2	2443095	2458012	14917	Predicted by at least one method			GAS18_RS26320	2449222	2449296	-1	transposase
Chr2	2443095	2458012	14917	Predicted by at least one method			GAS18_RS26325	2449433	2449594	-1	integrase core domain-containing protein
Chr2	2443095	2458012	14917	Predicted by at least one method	WP_171466993.1		GAS18_RS26330	2449734	2450939	-1	IS3 family transposase
Chr2	2443095	2458012	14917	Predicted by at least one method			GAS18_RS26335	2451156	2451329	1	transposase
Chr2	2443095	2458012	14917	Predicted by at least one method			GAS18_RS26340	2451365	2453683	1	fimbrial biogenesis outer membrane usher protein
Chr2	2443095	2458012	14917	Predicted by at least one method	WP_171466994.1		GAS18_RS26345	2453726	2454835	1	fimbrial protein
Chr2	2443095	2458012	14917	Predicted by at least one method	WP_171466995.1		GAS18_RS26350	2454921	2455766	-1	IS3 family transposase
Chr2	2443095	2458012	14917	Predicted by at least one method	WP_017923452.1		GAS18_RS26355	2456535	2456993	1	hypothetical protein
Chr2	2443095	2458012	14917	Predicted by at least one method	WP_124837779.1		GAS18_RS26360	2457350	2458012	-1	HAD-IA family hydrolase
Chr2	2443095	2458012	14917	Predicted by at least one method	WP_012733684.1		GAS18_RS26365	2458009	2459259	-1	MFS transporter
Chr2	2443095	2448975	5880	Predicted by at least one method	WP_157808642.1		GAS18_RS26295	2443095	2443238	1	hypothetical protein
Chr2	2443095	2448975	5880	Predicted by at least one method	WP_017423242.1		GAS18_RS26300	2443667	2444836	-1	type 1 fimbrial protein
Chr2	2443095	2448975	5880	Predicted by at least one method			GAS18_RS26305	2444923	2447470	-1	fimbrial biogenesis outer membrane usher protein
Chr2	2443095	2448975	5880	Predicted by at least one method	WP_124837869.1		GAS18_RS26310	2447562	2448386	-1	fimbria/pilus periplasmic chaperone
Chr2	2443095	2448975	5880	Predicted by at least one method	WP_124837867.1		GAS18_RS26315	2448415	2448975	-1	type 1 fimbrial protein
Chr2	2539165	2544135	4970	Predicted by at least one method	WP_124837456.1		GAS18_RS26610	2539165	2539971	1	ABC transporter substrate-binding protein
Chr2	2539165	2544135	4970	Predicted by at least one method	WP_012733739.1		GAS18_RS26615	2540203	2540859	1	amino acid ABC transporter permease
Chr2	2539165	2544135	4970	Predicted by at least one method	WP_043225017.1		GAS18_RS26620	2540868	2541644	1	amino acid ABC transporter ATP-binding protein
Chr2	2539165	2544135	4970	Predicted by at least one method	WP_012733741.1		GAS18_RS26625	2541681	2543009	1	FAD-binding oxidoreductase
Chr2	2539165	2544135	4970	Predicted by at least one method	WP_012733742.1		GAS18_RS26630	2543331	2543795	-1	GNAT family N-acetyltransferase
Chr2	2539165	2544135	4970	Predicted by at least one method	WP_124837457.1		GAS18_RS26635	2543785	2544135	1	hypothetical protein
