# Supplementary material for: Next Generation Sequencing and Comparative Genomic Analysis Reveal Extreme Plasticity of Two Burkholderia glumae Strains HN1 and HN2
Source: Pathogens. 2022 Oct 30;11(11):1265. doi: 10.3390/pathogens11111265 (PMC9698995; doi:10.3390/pathogens11111265)
Supplement: Supplementary file 1 [file pathogens-11-01265-s001.zip › Table s6 hgt info.xlsx]

## Sheet: table s6
Potential HGTs of 18 strains
strain	gene	score	Potential donor TaxID
257sh-1	EXE55_RS00165	0.610008	28216
257sh-1	EXE55_RS00240	0.608778	1822464
257sh-1	EXE55_RS00260	0.615899	80840
257sh-1	EXE55_RS00275	0.610239	2603818
257sh-1	EXE55_RS00330	0.582267	1822464
257sh-1	EXE55_RS00350	0.611675	506
257sh-1	EXE55_RS00390	0.599113	1224
257sh-1	EXE55_RS00395	0.620317	28094
257sh-1	EXE55_RS00405	0.617137	480658
257sh-1	EXE55_RS00410	0.502154	28211
257sh-1	EXE55_RS00420	0.603421	1224
257sh-1	EXE55_RS00425	0.509958	1822464
257sh-1	EXE55_RS00430	0.615905	1822464
257sh-1	EXE55_RS00435	0.617671	1822464
257sh-1	EXE55_RS00440	0.619413	1822464
257sh-1	EXE55_RS00445	0.61393	1822464
257sh-1	EXE55_RS00450	0.503255	28216
257sh-1	EXE55_RS00455	0.362236	119060
257sh-1	EXE55_RS00460	0.533187	28216
257sh-1	EXE55_RS00505	0.599325	2292265
257sh-1	EXE55_RS00515	0.59698	2292265
257sh-1	EXE55_RS00540	0.5682	119060
257sh-1	EXE55_RS00580	0.539358	119060
257sh-1	EXE55_RS00595	0.516824	1224
257sh-1	EXE55_RS00605	0.510192	91347
257sh-1	EXE55_RS00610	0.59575	984307
257sh-1	EXE55_RS00630	0.613003	1822464
257sh-1	EXE55_RS00635	0.619443	1822464
257sh-1	EXE55_RS00640	0.570805	1224
257sh-1	EXE55_RS00645	0.440587	1224
257sh-1	EXE55_RS00650	0.616512	1224
257sh-1	EXE55_RS00675	0.585876	80840
257sh-1	EXE55_RS00795	0.502956	80840
257sh-1	EXE55_RS00800	0.596841	80840
257sh-1	EXE55_RS00955	0.321898	1224
257sh-1	EXE55_RS00960	0.619169	1822464
257sh-1	EXE55_RS00965	0.539364	1822464
257sh-1	EXE55_RS00970	0.577111	1822464
257sh-1	EXE55_RS00975	0.596581	80840
257sh-1	EXE55_RS01080	0.363397	1224
257sh-1	EXE55_RS01085	0.298671	1224
257sh-1	EXE55_RS01120	0.571993	119060
257sh-1	EXE55_RS01125	0.500683	119060
257sh-1	EXE55_RS01130	0.571842	119060
257sh-1	EXE55_RS01135	0.497565	119060
257sh-1	EXE55_RS01145	0.565054	119060
257sh-1	EXE55_RS01150	0.619509	119060
257sh-1	EXE55_RS01160	0.529508	119060
257sh-1	EXE55_RS01165	0.589114	119060
257sh-1	EXE55_RS01485	0.50858	1224
257sh-1	EXE55_RS01570	0.536065	1224
257sh-1	EXE55_RS01645	0.523847	80840
257sh-1	EXE55_RS01815	0.580398	1224
257sh-1	EXE55_RS01855	0.605514	119060
257sh-1	EXE55_RS01980	0.43895	1822464
257sh-1	EXE55_RS02035	0.567225	119060
257sh-1	EXE55_RS02115	0.520277	1224
257sh-1	EXE55_RS02120	0.5951	1236
257sh-1	EXE55_RS02130	0.600602	93217
257sh-1	EXE55_RS02200	0.495433	119060
257sh-1	EXE55_RS02205	0.6201	1218083
257sh-1	EXE55_RS02210	0.590741	119060
257sh-1	EXE55_RS02215	0.561282	1224
257sh-1	EXE55_RS02230	0.520142	1224
257sh-1	EXE55_RS02290	0.51623	1224
257sh-1	EXE55_RS02355	0.503289	2
257sh-1	EXE55_RS02365	0.516413	2
257sh-1	EXE55_RS02380	0.516126	2
257sh-1	EXE55_RS02390	0.50479	2
257sh-1	EXE55_RS02440	0.606103	265293
257sh-1	EXE55_RS02475	0.416991	1224
257sh-1	EXE55_RS02505	0.60898	265293
257sh-1	EXE55_RS02510	0.619658	265293
257sh-1	EXE55_RS02545	0.604164	265293
257sh-1	EXE55_RS02560	0.60447	265293
257sh-1	EXE55_RS02570	0.561644	265293
257sh-1	EXE55_RS02580	0.524811	119060
257sh-1	EXE55_RS02605	0.613763	1822464
257sh-1	EXE55_RS02620	0.499043	1224
257sh-1	EXE55_RS02625	0.562387	1224
257sh-1	EXE55_RS02635	0.618411	119060
257sh-1	EXE55_RS02640	0.618913	1224
257sh-1	EXE55_RS02645	0.55643	1822464
257sh-1	EXE55_RS02835	0.618952	119060
257sh-1	EXE55_RS02920	0.492046	1224
257sh-1	EXE55_RS02925	0.52598	1224
257sh-1	EXE55_RS02930	0.56335	1792498
257sh-1	EXE55_RS02945	0.614095	119060
257sh-1	EXE55_RS02950	0.418358	80840
257sh-1	EXE55_RS02955	0.493201	1224
257sh-1	EXE55_RS02965	0.561386	1822464
257sh-1	EXE55_RS02970	0.541492	1822464
257sh-1	EXE55_RS02980	0.574647	1822464
257sh-1	EXE55_RS02985	0.551398	1822464
257sh-1	EXE55_RS02995	0.552663	1822464
257sh-1	EXE55_RS03015	0.550806	1224
257sh-1	EXE55_RS03020	0.538091	119060
257sh-1	EXE55_RS03025	0.610129	1822464
257sh-1	EXE55_RS03030	0.614969	1822464
257sh-1	EXE55_RS03040	0.60312	1822464
257sh-1	EXE55_RS03070	0.577086	80840
257sh-1	EXE55_RS03115	0.510142	2
257sh-1	EXE55_RS03125	0.453084	119060
257sh-1	EXE55_RS03135	0.516987	28216
257sh-1	EXE55_RS03515	0.60316	28216
257sh-1	EXE55_RS03720	0.615691	80840
257sh-1	EXE55_RS03780	0.615466	80840
257sh-1	EXE55_RS03840	0.509328	119060
257sh-1	EXE55_RS03865	0.503026	119060
257sh-1	EXE55_RS03900	0.310454	1224
257sh-1	EXE55_RS03985	0.616391	1822464
257sh-1	EXE55_RS04065	0.609636	80840
257sh-1	EXE55_RS04420	0.608861	28216
257sh-1	EXE55_RS04430	0.584594	28216
257sh-1	EXE55_RS04485	0.589293	80840
257sh-1	EXE55_RS04500	0.50324	119060
257sh-1	EXE55_RS04505	0.565832	119060
257sh-1	EXE55_RS04535	0.55871	2
257sh-1	EXE55_RS04540	0.600281	1822464
257sh-1	EXE55_RS04570	0.567629	119060
257sh-1	EXE55_RS05010	0.5773	1224
257sh-1	EXE55_RS05020	0.521719	1224
257sh-1	EXE55_RS05045	0.502005	119060
257sh-1	EXE55_RS05050	0.617409	1827195
257sh-1	EXE55_RS05055	0.609253	28216
257sh-1	EXE55_RS05070	0.616055	627669
257sh-1	EXE55_RS05075	0.597501	627669
257sh-1	EXE55_RS05080	0.520108	119060
257sh-1	EXE55_RS05095	0.510227	1224
257sh-1	EXE55_RS05185	0.601711	119060
257sh-1	EXE55_RS05215	0.600281	1822464
257sh-1	EXE55_RS05220	0.55871	2
257sh-1	EXE55_RS05365	0.556983	119060
257sh-1	EXE55_RS05375	0.536065	1224
257sh-1	EXE55_RS05750	0.257264	1224
257sh-1	EXE55_RS05825	0.340373	1224
257sh-1	EXE55_RS06010	0.511413	1224
257sh-1	EXE55_RS06180	0.490359	1224
257sh-1	EXE55_RS06285	0.565693	119060
257sh-1	EXE55_RS06290	0.504682	119060
257sh-1	EXE55_RS06315	0.516193	1822464
257sh-1	EXE55_RS06395	0.607309	1822464
257sh-1	EXE55_RS06445	0.536199	1822464
257sh-1	EXE55_RS06955	0.565832	119060
257sh-1	EXE55_RS06960	0.50324	119060
257sh-1	EXE55_RS06995	0.600281	1822464
257sh-1	EXE55_RS07000	0.55871	2
257sh-1	EXE55_RS07030	0.542402	564714
257sh-1	EXE55_RS07040	0.583838	564714
257sh-1	EXE55_RS07095	0.38037	1224
257sh-1	EXE55_RS07100	0.550041	487049
257sh-1	EXE55_RS07105	0.378502	1224
257sh-1	EXE55_RS07190	0.337094	1224
257sh-1	EXE55_RS07195	0.397345	1224
257sh-1	EXE55_RS07265	0.335001	1224
257sh-1	EXE55_RS07865	0.448155	119060
257sh-1	EXE55_RS07875	0.597066	1822464
257sh-1	EXE55_RS07885	0.599754	1822464
257sh-1	EXE55_RS07890	0.589852	1822464
257sh-1	EXE55_RS07895	0.568657	1822464
257sh-1	EXE55_RS07900	0.538644	119060
257sh-1	EXE55_RS07905	0.530869	1822464
257sh-1	EXE55_RS07920	0.614879	1224
257sh-1	EXE55_RS07945	0.546997	506
257sh-1	EXE55_RS07950	0.464069	1224
257sh-1	EXE55_RS07965	0.609955	80840
257sh-1	EXE55_RS08850	0.589293	80840
257sh-1	EXE55_RS08870	0.504682	119060
257sh-1	EXE55_RS08875	0.565693	119060
257sh-1	EXE55_RS09225	0.583821	1224
257sh-1	EXE55_RS09375	0.528756	2
257sh-1	EXE55_RS09420	0.598403	1792498
257sh-1	EXE55_RS09940	0.254701	1224
257sh-1	EXE55_RS10105	0.586243	1822464
257sh-1	EXE55_RS10110	0.612704	119060
257sh-1	EXE55_RS10140	0.536065	1224
257sh-1	EXE55_RS10375	0.611988	1224
257sh-1	EXE55_RS10420	0.540578	1224
257sh-1	EXE55_RS10525	0.411642	1224
257sh-1	EXE55_RS10740	0.606862	80840
257sh-1	EXE55_RS10745	0.580755	1822464
257sh-1	EXE55_RS10755	0.596958	80840
257sh-1	EXE55_RS10785	0.480368	1224
257sh-1	EXE55_RS10970	0.504296	1224
257sh-1	EXE55_RS11270	0.309911	1224
257sh-1	EXE55_RS11295	0.29739	1224
257sh-1	EXE55_RS11300	0.37276	1224
257sh-1	EXE55_RS11315	0.597954	1224
257sh-1	EXE55_RS11325	0.297454	1224
257sh-1	EXE55_RS11355	0.368937	1224
257sh-1	EXE55_RS11365	0.371115	1224
257sh-1	EXE55_RS11380	0.274004	1224
257sh-1	EXE55_RS11395	0.337191	1224
257sh-1	EXE55_RS11735	0.33389	1224
257sh-1	EXE55_RS11820	0.55871	2
257sh-1	EXE55_RS11825	0.600281	1822464
257sh-1	EXE55_RS11835	0.55199	119060
257sh-1	EXE55_RS11840	0.617366	1224
257sh-1	EXE55_RS11845	0.520962	1224
257sh-1	EXE55_RS11855	0.523023	1224
257sh-1	EXE55_RS11860	0.425605	28216
257sh-1	EXE55_RS11880	0.609238	28216
257sh-1	EXE55_RS11890	0.538885	1224
257sh-1	EXE55_RS12155	0.555445	119060
257sh-1	EXE55_RS12820	0.342487	1224
257sh-1	EXE55_RS13245	0.564816	1224
257sh-1	EXE55_RS13505	0.615756	1224
257sh-1	EXE55_RS13540	0.313156	1224
257sh-1	EXE55_RS13605	0.524388	1224
257sh-1	EXE55_RS13610	0.587021	1224
257sh-1	EXE55_RS13615	0.571914	1218075
257sh-1	EXE55_RS13625	0.538618	1218075
257sh-1	EXE55_RS13640	0.570279	119060
257sh-1	EXE55_RS13750	0.382664	1224
257sh-1	EXE55_RS13895	0.58322	1822464
257sh-1	EXE55_RS14060	0.540735	871203
257sh-1	EXE55_RS14150	0.60578	1827195
257sh-1	EXE55_RS14185	0.319895	1224
257sh-1	EXE55_RS14255	0.539069	119060
257sh-1	EXE55_RS14355	0.602859	1224
257sh-1	EXE55_RS14360	0.615499	1224
257sh-1	EXE55_RS14365	0.614446	91347
257sh-1	EXE55_RS14370	0.531878	1224
257sh-1	EXE55_RS14565	0.346782	1224
257sh-1	EXE55_RS14740	0.521593	1224
257sh-1	EXE55_RS14825	0.324436	1224
257sh-1	EXE55_RS14945	0.565832	119060
257sh-1	EXE55_RS14950	0.50324	119060
257sh-1	EXE55_RS15030	0.541778	1224
257sh-1	EXE55_RS15230	0.485938	119060
257sh-1	EXE55_RS15335	0.333128	1224
257sh-1	EXE55_RS15385	0.541638	1224
257sh-1	EXE55_RS15395	0.608011	2
257sh-1	EXE55_RS15420	0.618896	1827195
257sh-1	EXE55_RS15435	0.480581	1224
257sh-1	EXE55_RS15440	0.508901	1224
257sh-1	EXE55_RS15450	0.601217	119060
257sh-1	EXE55_RS15455	0.483843	119060
257sh-1	EXE55_RS15460	0.555778	80840
257sh-1	EXE55_RS15465	0.546998	119060
257sh-1	EXE55_RS15470	0.574437	28216
257sh-1	EXE55_RS15480	0.611344	119060
257sh-1	EXE55_RS15485	0.527469	1224
257sh-1	EXE55_RS15490	0.565914	80840
257sh-1	EXE55_RS15495	0.606015	2282883
257sh-1	EXE55_RS15500	0.599466	2282883
257sh-1	EXE55_RS15525	0.565552	80840
257sh-1	EXE55_RS15540	0.384854	1224
257sh-1	EXE55_RS15545	0.441273	2
257sh-1	EXE55_RS15565	0.50114	119060
257sh-1	EXE55_RS15575	0.538398	80840
257sh-1	EXE55_RS15585	0.552481	2
257sh-1	EXE55_RS15600	0.531365	1224
257sh-1	EXE55_RS15605	0.477168	28216
257sh-1	EXE55_RS15860	0.590265	1224
257sh-1	EXE55_RS15865	0.58645	28216
257sh-1	EXE55_RS15950	0.610748	1822464
257sh-1	EXE55_RS15955	0.613203	1822464
257sh-1	EXE55_RS15960	0.459725	1822464
257sh-1	EXE55_RS15965	0.599619	1822464
257sh-1	EXE55_RS15980	0.609959	28216
257sh-1	EXE55_RS15990	0.617677	1224
257sh-1	EXE55_RS15995	0.536065	1224
257sh-1	EXE55_RS16045	0.559196	1912599
257sh-1	EXE55_RS16050	0.554249	1224
257sh-1	EXE55_RS16065	0.573708	1224
257sh-1	EXE55_RS16075	0.563486	1224
257sh-1	EXE55_RS16085	0.50542	80840
257sh-1	EXE55_RS16090	0.608153	1224
257sh-1	EXE55_RS16095	0.564255	60549
257sh-1	EXE55_RS16100	0.500309	1224
257sh-1	EXE55_RS16115	0.45242	1224
257sh-1	EXE55_RS16140	0.601736	28216
257sh-1	EXE55_RS16150	0.572614	119060
257sh-1	EXE55_RS16155	0.550559	1822464
257sh-1	EXE55_RS16160	0.518365	1822464
257sh-1	EXE55_RS16165	0.528823	1822464
257sh-1	EXE55_RS16170	0.566776	1224
257sh-1	EXE55_RS16205	0.596316	227292
257sh-1	EXE55_RS16210	0.58447	28092
257sh-1	EXE55_RS16215	0.606632	119060
257sh-1	EXE55_RS16230	0.611065	119060
257sh-1	EXE55_RS16235	0.536942	119060
257sh-1	EXE55_RS16240	0.616986	119060
257sh-1	EXE55_RS16295	0.556441	119060
257sh-1	EXE55_RS16300	0.457483	2
257sh-1	EXE55_RS16305	0.60472	1224
257sh-1	EXE55_RS16310	0.524545	1760
257sh-1	EXE55_RS16315	0.601176	2419777
257sh-1	EXE55_RS16320	0.584098	2419777
257sh-1	EXE55_RS16325	0.586622	2419777
257sh-1	EXE55_RS16330	0.528032	2419777
257sh-1	EXE55_RS16335	0.572483	2
257sh-1	EXE55_RS16340	0.562494	1760
257sh-1	EXE55_RS16355	0.418464	1224
257sh-1	EXE55_RS16440	0.530585	119060
257sh-1	EXE55_RS16455	0.526546	266265
257sh-1	EXE55_RS16475	0.517404	28216
257sh-1	EXE55_RS16535	0.606774	417203
257sh-1	EXE55_RS16550	0.50324	119060
257sh-1	EXE55_RS16555	0.565832	119060
257sh-1	EXE55_RS16565	0.61651	119060
257sh-1	EXE55_RS16745	0.616987	1224
257sh-1	EXE55_RS16750	0.569972	2
257sh-1	EXE55_RS16755	0.607307	1224
257sh-1	EXE55_RS16850	0.536065	1224
257sh-1	EXE55_RS16945	0.553927	1218081
257sh-1	EXE55_RS16960	0.592016	1218081
257sh-1	EXE55_RS17010	0.603797	80840
257sh-1	EXE55_RS17020	0.586221	119060
257sh-1	EXE55_RS17105	0.601722	1224
257sh-1	EXE55_RS17180	0.619087	119060
257sh-1	EXE55_RS17195	0.546952	119060
257sh-1	EXE55_RS17250	0.50637	28092
257sh-1	EXE55_RS17290	0.620156	119060
257sh-1	EXE55_RS17305	0.591353	119060
257sh-1	EXE55_RS17310	0.541079	119060
257sh-1	EXE55_RS17315	0.467535	119060
257sh-1	EXE55_RS17320	0.425156	119060
257sh-1	EXE55_RS17345	0.477279	119060
257sh-1	EXE55_RS17360	0.447561	80840
257sh-1	EXE55_RS17395	0.553305	1224
257sh-1	EXE55_RS17415	0.50016	119060
257sh-1	EXE55_RS17420	0.385946	1224
257sh-1	EXE55_RS17465	0.551047	420952
257sh-1	EXE55_RS17525	0.326847	1224
257sh-1	EXE55_RS17590	0.539485	119060
257sh-1	EXE55_RS17600	0.525247	1822464
257sh-1	EXE55_RS17685	0.448242	1224
257sh-1	EXE55_RS17690	0.54591	1224
257sh-1	EXE55_RS17740	0.581177	1224
257sh-1	EXE55_RS17895	0.523381	2
257sh-1	EXE55_RS17900	0.518493	2
257sh-1	EXE55_RS17905	0.524393	1224
257sh-1	EXE55_RS17910	0.5104	2
257sh-1	EXE55_RS17940	0.520578	119060
257sh-1	EXE55_RS18000	0.588835	119060
257sh-1	EXE55_RS18175	0.52389	119060
257sh-1	EXE55_RS18240	0.533213	1224
257sh-1	EXE55_RS18350	0.515575	1236
257sh-1	EXE55_RS18360	0.52816	1236
257sh-1	EXE55_RS18375	0.607317	1224
257sh-1	EXE55_RS18425	0.554972	119060
257sh-1	EXE55_RS18430	0.516898	1822464
257sh-1	EXE55_RS18435	0.611226	1822464
257sh-1	EXE55_RS18685	0.595564	1822464
257sh-1	EXE55_RS18690	0.620257	1827195
257sh-1	EXE55_RS18720	0.567292	1822464
257sh-1	EXE55_RS18730	0.515728	1224
257sh-1	EXE55_RS18755	0.615235	1224
257sh-1	EXE55_RS18760	0.558435	119060
257sh-1	EXE55_RS18765	0.560757	119060
257sh-1	EXE55_RS18770	0.593071	119060
257sh-1	EXE55_RS18855	0.526199	119060
257sh-1	EXE55_RS18860	0.60601	1224
257sh-1	EXE55_RS18870	0.572271	119060
257sh-1	EXE55_RS18900	0.618758	1822464
257sh-1	EXE55_RS18905	0.430139	28216
257sh-1	EXE55_RS18920	0.505322	1822464
257sh-1	EXE55_RS18925	0.615669	1822464
257sh-1	EXE55_RS18965	0.392107	1224
257sh-1	EXE55_RS19000	0.567031	2
257sh-1	EXE55_RS19050	0.506471	119060
257sh-1	EXE55_RS19110	0.574371	1224
257sh-1	EXE55_RS19115	0.574952	1224
257sh-1	EXE55_RS19165	0.599468	119060
257sh-1	EXE55_RS19170	0.556956	119060
257sh-1	EXE55_RS19230	0.613326	93217
257sh-1	EXE55_RS19240	0.557765	1224
257sh-1	EXE55_RS19285	0.60653	119060
257sh-1	EXE55_RS19295	0.596038	119060
257sh-1	EXE55_RS19300	0.591818	119060
257sh-1	EXE55_RS19315	0.54133	1108595
257sh-1	EXE55_RS19320	0.501303	535
257sh-1	EXE55_RS19335	0.504975	48736
257sh-1	EXE55_RS19360	0.502351	564714
257sh-1	EXE55_RS19370	0.551106	2
257sh-1	EXE55_RS19385	0.558807	80840
257sh-1	EXE55_RS19395	0.620497	1224
257sh-1	EXE55_RS19400	0.59141	1822464
257sh-1	EXE55_RS19415	0.560977	119060
257sh-1	EXE55_RS19435	0.470115	1224
257sh-1	EXE55_RS19450	0.57407	2
257sh-1	EXE55_RS19460	0.58461	1903411
257sh-1	EXE55_RS19465	0.59331	1903411
257sh-1	EXE55_RS19470	0.592108	93217
257sh-1	EXE55_RS19475	0.549883	1903411
257sh-1	EXE55_RS19480	0.517095	1224
257sh-1	EXE55_RS19485	0.322936	1224
257sh-1	EXE55_RS19495	0.607853	28211
257sh-1	EXE55_RS19555	0.530243	1224
257sh-1	EXE55_RS19565	0.602599	1224
257sh-1	EXE55_RS19570	0.550251	1224
257sh-1	EXE55_RS19575	0.526328	1224
257sh-1	EXE55_RS19580	0.537201	1224
257sh-1	EXE55_RS19585	0.572641	2
257sh-1	EXE55_RS19590	0.612543	1224
257sh-1	EXE55_RS19595	0.614286	1224
257sh-1	EXE55_RS19600	0.522917	119060
257sh-1	EXE55_RS19655	0.513711	119060
257sh-1	EXE55_RS19660	0.620002	1218076
257sh-1	EXE55_RS19665	0.510283	119060
257sh-1	EXE55_RS19680	0.595998	119060
257sh-1	EXE55_RS19685	0.547079	119060
257sh-1	EXE55_RS19695	0.567688	2571160
257sh-1	EXE55_RS19710	0.559921	119060
257sh-1	EXE55_RS19730	0.608163	1224
257sh-1	EXE55_RS19860	0.61195	119060
257sh-1	EXE55_RS19880	0.374916	1224
257sh-1	EXE55_RS19885	0.429726	1224
257sh-1	EXE55_RS19890	0.529623	1224
257sh-1	EXE55_RS19895	0.419026	1224
257sh-1	EXE55_RS19900	0.551767	1224
257sh-1	EXE55_RS19915	0.520121	984307
257sh-1	EXE55_RS20000	0.599654	984307
257sh-1	EXE55_RS20030	0.589293	80840
257sh-1	EXE55_RS20095	0.602176	28216
257sh-1	EXE55_RS20115	0.589293	80840
257sh-1	EXE55_RS20130	0.527427	119060
257sh-1	EXE55_RS20150	0.515241	119060
257sh-1	EXE55_RS20180	0.501584	119060
257sh-1	EXE55_RS20235	0.598405	1783272
257sh-1	EXE55_RS20240	0.599346	119060
257sh-1	EXE55_RS20245	0.522666	80840
257sh-1	EXE55_RS20250	0.618384	80840
257sh-1	EXE55_RS20255	0.587179	1822464
257sh-1	EXE55_RS20265	0.613085	119060
257sh-1	EXE55_RS20270	0.524553	119060
257sh-1	EXE55_RS20275	0.478095	119060
257sh-1	EXE55_RS20280	0.38022	1224
257sh-1	EXE55_RS20310	0.5856	1822464
257sh-1	EXE55_RS20315	0.516229	119060
257sh-1	EXE55_RS20320	0.601385	1822464
257sh-1	EXE55_RS20325	0.613498	1822464
257sh-1	EXE55_RS20330	0.582486	1822464
257sh-1	EXE55_RS20355	0.485356	2
257sh-1	EXE55_RS20400	0.569681	1224
257sh-1	EXE55_RS20440	0.528744	1822464
257sh-1	EXE55_RS20445	0.618798	80840
257sh-1	EXE55_RS20450	0.588133	1224
257sh-1	EXE55_RS20530	0.50324	119060
257sh-1	EXE55_RS20535	0.565832	119060
257sh-1	EXE55_RS20555	0.600041	1224
257sh-1	EXE55_RS20560	0.53116	1224
257sh-1	EXE55_RS20705	0.590392	1224
257sh-1	EXE55_RS20710	0.428189	1224
257sh-1	EXE55_RS20715	0.411632	1224
257sh-1	EXE55_RS20720	0.325832	1224
257sh-1	EXE55_RS20725	0.413011	1224
257sh-1	EXE55_RS20750	0.578064	1822464
257sh-1	EXE55_RS20835	0.60878	80840
257sh-1	EXE55_RS20850	0.602028	28216
257sh-1	EXE55_RS20870	0.612555	28216
257sh-1	EXE55_RS21005	0.514761	1224
257sh-1	EXE55_RS21030	0.591887	1822464
257sh-1	EXE55_RS21155	0.571331	1224
257sh-1	EXE55_RS21190	0.604034	2
257sh-1	EXE55_RS21295	0.535291	119060
257sh-1	EXE55_RS21300	0.544003	119060
257sh-1	EXE55_RS21305	0.540227	119060
257sh-1	EXE55_RS21320	0.537618	119060
257sh-1	EXE55_RS21325	0.542637	119060
257sh-1	EXE55_RS21360	0.54283	119060
257sh-1	EXE55_RS21375	0.55093	321895
257sh-1	EXE55_RS21420	0.614067	1822464
257sh-1	EXE55_RS21465	0.457266	1224
257sh-1	EXE55_RS21470	0.486388	1224
257sh-1	EXE55_RS21475	0.53882	1822464
257sh-1	EXE55_RS21505	0.535785	119060
257sh-1	EXE55_RS21510	0.59976	1224
257sh-1	EXE55_RS21515	0.59903	28216
257sh-1	EXE55_RS21520	0.620568	28216
257sh-1	EXE55_RS21530	0.604039	265293
257sh-1	EXE55_RS21535	0.586305	265293
257sh-1	EXE55_RS21540	0.540792	265293
257sh-1	EXE55_RS21545	0.500203	265293
257sh-1	EXE55_RS21580	0.556411	119060
257sh-1	EXE55_RS21590	0.599187	1224
257sh-1	EXE55_RS21595	0.429315	1224
257sh-1	EXE55_RS21795	0.568893	80840
257sh-1	EXE55_RS21800	0.556669	1224
257sh-1	EXE55_RS21805	0.606988	1224
257sh-1	EXE55_RS21830	0.619501	28211
257sh-1	EXE55_RS21840	0.574343	980631
257sh-1	EXE55_RS21850	0.526986	1822464
257sh-1	EXE55_RS21880	0.50748	80840
257sh-1	EXE55_RS21895	0.617547	93217
257sh-1	EXE55_RS21925	0.510281	265293
257sh-1	EXE55_RS21930	0.582585	119060
257sh-1	EXE55_RS21950	0.542588	119060
257sh-1	EXE55_RS22025	0.620004	80840
257sh-1	EXE55_RS22260	0.530168	665038
257sh-1	EXE55_RS22265	0.504852	1324617
257sh-1	EXE55_RS22270	0.537668	1324617
257sh-1	EXE55_RS22275	0.50005	1324617
257sh-1	EXE55_RS22280	0.527328	1324617
257sh-1	EXE55_RS22285	0.522413	1324617
257sh-1	EXE55_RS22325	0.542203	80840
257sh-1	EXE55_RS22340	0.5674	119060
257sh-1	EXE55_RS22345	0.510587	119060
257sh-1	EXE55_RS22355	0.619658	2
257sh-1	EXE55_RS22405	0.527117	80840
257sh-1	EXE55_RS22415	0.564988	2
257sh-1	EXE55_RS22445	0.581076	1224
257sh-1	EXE55_RS22480	0.620499	119060
257sh-1	EXE55_RS22510	0.530065	1224
257sh-1	EXE55_RS22515	0.617566	119060
257sh-1	EXE55_RS22560	0.444158	1224
257sh-1	EXE55_RS22570	0.433487	28216
257sh-1	EXE55_RS22625	0.615238	1822464
257sh-1	EXE55_RS22630	0.569331	1224
257sh-1	EXE55_RS22645	0.608092	1822464
257sh-1	EXE55_RS22725	0.504817	1224
257sh-1	EXE55_RS22730	0.353157	1224
257sh-1	EXE55_RS22735	0.422407	1224
257sh-1	EXE55_RS22740	0.326692	1224
257sh-1	EXE55_RS22745	0.393872	1224
257sh-1	EXE55_RS22840	0.50937	1224
257sh-1	EXE55_RS23000	0.56768	1224
257sh-1	EXE55_RS23005	0.566074	119060
257sh-1	EXE55_RS23045	0.581769	1224
257sh-1	EXE55_RS23225	0.612187	80840
257sh-1	EXE55_RS23405	0.478346	2
257sh-1	EXE55_RS23475	0.492673	2
257sh-1	EXE55_RS23500	0.385203	1224
257sh-1	EXE55_RS23530	0.510273	119060
257sh-1	EXE55_RS23540	0.562937	1822464
257sh-1	EXE55_RS23595	0.567815	1792498
257sh-1	EXE55_RS23615	0.43362	1224
257sh-1	EXE55_RS23645	0.600135	2
257sh-1	EXE55_RS23650	0.614994	1236
257sh-1	EXE55_RS23655	0.590845	857265
257sh-1	EXE55_RS23660	0.615499	119060
257sh-1	EXE55_RS23670	0.545956	119060
257sh-1	EXE55_RS23685	0.584619	1760
257sh-1	EXE55_RS23690	0.612194	1224
257sh-1	EXE55_RS23695	0.602264	1224
257sh-1	EXE55_RS23760	0.615138	2
257sh-1	EXE55_RS23825	0.548281	2
257sh-1	EXE55_RS23830	0.619738	2
257sh-1	EXE55_RS23840	0.503747	29487
257sh-1	EXE55_RS23935	0.55658	93217
257sh-1	EXE55_RS23975	0.55989	265293
257sh-1	EXE55_RS24005	0.53303	2
257sh-1	EXE55_RS24140	0.569971	1224
257sh-1	EXE55_RS24150	0.608594	1224
257sh-1	EXE55_RS24155	0.52915	626
257sh-1	EXE55_RS24165	0.541319	2
257sh-1	EXE55_RS24205	0.542525	80840
257sh-1	EXE55_RS24245	0.607135	1822464
257sh-1	EXE55_RS24250	0.619408	80840
257sh-1	EXE55_RS24255	0.586555	80840
257sh-1	EXE55_RS24260	0.601791	1822464
257sh-1	EXE55_RS24265	0.373889	1822464
257sh-1	EXE55_RS24270	0.471625	1822464
257sh-1	EXE55_RS24275	0.428633	1224
257sh-1	EXE55_RS24295	0.542525	80840
257sh-1	EXE55_RS24305	0.599301	1224
257sh-1	EXE55_RS24355	0.614463	2
257sh-1	EXE55_RS24370	0.587285	80840
257sh-1	EXE55_RS24380	0.575148	2419777
257sh-1	EXE55_RS24385	0.589209	119060
257sh-1	EXE55_RS24420	0.589293	80840
257sh-1	EXE55_RS24450	0.618095	119060
257sh-1	EXE55_RS24455	0.605606	356
257sh-1	EXE55_RS29955	0.570075	119060
257sh-1	EXE55_RS24485	0.474826	2
257sh-1	EXE55_RS24490	0.544836	2
257sh-1	EXE55_RS24540	0.558114	119060
257sh-1	EXE55_RS24565	0.538524	28216
257sh-1	EXE55_RS24570	0.470767	1224
257sh-1	EXE55_RS24575	0.503682	1224
257sh-1	EXE55_RS24595	0.529028	1224
257sh-1	EXE55_RS24630	0.509629	1224
257sh-1	EXE55_RS24640	0.50672	1224
257sh-1	EXE55_RS24670	0.510203	1822464
257sh-1	EXE55_RS24675	0.543749	1822464
257sh-1	EXE55_RS24690	0.577324	119060
257sh-1	EXE55_RS24695	0.5849	80840
257sh-1	EXE55_RS24700	0.619368	1822464
257sh-1	EXE55_RS24705	0.488701	119060
257sh-1	EXE55_RS24710	0.529021	119060
257sh-1	EXE55_RS24715	0.581703	1822464
257sh-1	EXE55_RS24720	0.561229	2571748
257sh-1	EXE55_RS24725	0.609285	1224
257sh-1	EXE55_RS24775	0.555899	1822464
257sh-1	EXE55_RS24780	0.516253	28216
257sh-1	EXE55_RS24815	0.417454	119060
257sh-1	EXE55_RS24890	0.583172	1822464
257sh-1	EXE55_RS24915	0.598835	1822464
257sh-1	EXE55_RS25160	0.602614	1224
257sh-1	EXE55_RS25175	0.474184	80840
257sh-1	EXE55_RS25215	0.513138	119060
257sh-1	EXE55_RS25220	0.617832	119060
257sh-1	EXE55_RS25225	0.501309	119060
257sh-1	EXE55_RS25230	0.529207	1224
257sh-1	EXE55_RS25240	0.525769	1224
257sh-1	EXE55_RS25285	0.543541	119060
257sh-1	EXE55_RS25375	0.616389	1822464
257sh-1	EXE55_RS25385	0.53359	1822464
257sh-1	EXE55_RS25390	0.583024	1822464
257sh-1	EXE55_RS25395	0.594614	1822464
257sh-1	EXE55_RS25415	0.485614	80840
257sh-1	EXE55_RS25475	0.606634	28216
257sh-1	EXE55_RS25610	0.564587	1224
257sh-1	EXE55_RS25615	0.588718	1224
257sh-1	EXE55_RS25640	0.601478	28216
257sh-1	EXE55_RS25675	0.611055	1245436
257sh-1	EXE55_RS25695	0.595366	28216
257sh-1	EXE55_RS25700	0.5182	1324617
257sh-1	EXE55_RS25775	0.55153	28092
257sh-1	EXE55_RS25790	0.619504	28092
257sh-1	EXE55_RS25795	0.575546	28092
257sh-1	EXE55_RS25820	0.62025	28092
257sh-1	EXE55_RS25835	0.58574	1224
257sh-1	EXE55_RS25845	0.585492	80840
257sh-1	EXE55_RS25880	0.503604	80840
257sh-1	EXE55_RS25895	0.458941	1224
257sh-1	EXE55_RS25905	0.615244	80840
257sh-1	EXE55_RS25910	0.599364	119060
257sh-1	EXE55_RS25915	0.616355	119060
257sh-1	EXE55_RS25920	0.616937	119060
257sh-1	EXE55_RS25930	0.614209	119060
257sh-1	EXE55_RS25940	0.582464	1218075
257sh-1	EXE55_RS26135	0.512116	1224
257sh-1	EXE55_RS26140	0.541921	119060
257sh-1	EXE55_RS26215	0.511123	1224
257sh-1	EXE55_RS26225	0.532704	1224
257sh-1	EXE55_RS26230	0.556528	1822464
257sh-1	EXE55_RS26235	0.500226	1224
257sh-1	EXE55_RS26240	0.53675	1224
257sh-1	EXE55_RS26260	0.568734	1822464
257sh-1	EXE55_RS26265	0.572155	119060
257sh-1	EXE55_RS26285	0.593253	984307
257sh-1	EXE55_RS26290	0.58717	984307
257sh-1	EXE55_RS26300	0.608855	1408420
257sh-1	EXE55_RS26340	0.560313	80840
257sh-1	EXE55_RS26355	0.606109	1822464
257sh-1	EXE55_RS26360	0.614067	1822464
257sh-1	EXE55_RS26390	0.604194	119060
257sh-1	EXE55_RS26400	0.596364	119060
257sh-1	EXE55_RS26405	0.551047	119060
257sh-1	EXE55_RS26415	0.510307	119060
257sh-1	EXE55_RS26420	0.527723	119060
257sh-1	EXE55_RS26455	0.550331	119060
257sh-1	EXE55_RS26460	0.552718	119060
257sh-1	EXE55_RS26475	0.607864	1224
257sh-1	EXE55_RS26550	0.611272	338
257sh-1	EXE55_RS26565	0.596001	1224
257sh-1	EXE55_RS26630	0.542525	80840
257sh-1	EXE55_RS26680	0.605835	1224
257sh-1	EXE55_RS26705	0.602855	2
257sh-1	EXE55_RS26715	0.430071	119060
257sh-1	EXE55_RS26745	0.31084	1224
257sh-1	EXE55_RS26755	0.589293	80840
257sh-1	EXE55_RS26785	0.467204	2
257sh-1	EXE55_RS26795	0.523373	1224
257sh-1	EXE55_RS26800	0.586691	1822464
257sh-1	EXE55_RS26805	0.6154	312026
257sh-1	EXE55_RS26810	0.603167	1822464
257sh-1	EXE55_RS26815	0.514265	119060
257sh-1	EXE55_RS26890	0.565558	119060
257sh-1	EXE55_RS26940	0.61797	119060
257sh-1	EXE55_RS27030	0.509749	80840
257sh-1	EXE55_RS27085	0.614845	1224
257sh-1	EXE55_RS27090	0.594207	119060
257sh-1	EXE55_RS27095	0.570905	119060
257sh-1	EXE55_RS27100	0.61555	1822464
257sh-1	EXE55_RS27120	0.558003	119060
257sh-1	EXE55_RS27200	0.598543	1349767
257sh-1	EXE55_RS27210	0.584762	1224
257sh-1	EXE55_RS27220	0.504756	29
257sh-1	EXE55_RS27235	0.573928	1912599
257sh-1	EXE55_RS27240	0.571108	1224
257sh-1	EXE55_RS27285	0.477447	2
257sh-1	EXE55_RS27290	0.605761	2
257sh-1	EXE55_RS27295	0.584032	1224
257sh-1	EXE55_RS27300	0.591835	1224
257sh-1	EXE55_RS27315	0.580828	1224
257sh-1	EXE55_RS27330	0.58312	169430
257sh-1	EXE55_RS27340	0.615727	80840
257sh-1	EXE55_RS27345	0.578722	1544867
257sh-1	EXE55_RS27350	0.607581	80840
257sh-1	EXE55_RS27370	0.609483	80840
257sh-1	EXE55_RS27385	0.576983	80840
257sh-1	EXE55_RS27390	0.507762	80840
257sh-1	EXE55_RS27395	0.609938	80840
257sh-1	EXE55_RS27405	0.569094	2
257sh-1	EXE55_RS27410	0.6003	1224
257sh-1	EXE55_RS27425	0.504682	119060
257sh-1	EXE55_RS27430	0.565693	119060
257sh-1	EXE55_RS27460	0.557464	119060
257sh-1	EXE55_RS27685	0.541356	28216
257sh-1	EXE55_RS27695	0.524625	28216
257sh-1	EXE55_RS27730	0.558902	1224
257sh-1	EXE55_RS27785	0.588368	1177169
257sh-1	EXE55_RS27790	0.604917	1177169
257sh-1	EXE55_RS27880	0.537201	882378
257sh-1	EXE55_RS27940	0.586555	80840
257sh-1	EXE55_RS27945	0.619408	80840
257sh-1	EXE55_RS27955	0.554587	119060
257sh-1	EXE55_RS27965	0.619985	1224
257sh-1	EXE55_RS27975	0.603692	1224
257sh-1	EXE55_RS27990	0.613582	1224
257sh-1	EXE55_RS28015	0.53088	119060
257sh-1	EXE55_RS28045	0.605861	1822464
257sh-1	EXE55_RS28050	0.53594	119060
257sh-1	EXE55_RS28110	0.542525	80840
257sh-1	EXE55_RS28175	0.586555	80840
257sh-1	EXE55_RS28180	0.619408	80840
257sh-1	EXE55_RS28215	0.589293	80840
257sh-1	EXE55_RS28230	0.604192	119060
257sh-1	EXE55_RS28235	0.585651	131567
257sh-1	EXE55_RS28250	0.610811	1224
257sh-1	EXE55_RS28260	0.515976	28216
257sh-1	EXE55_RS28275	0.613921	119060
257sh-1	EXE55_RS28290	0.55346	445709
257sh-1	EXE55_RS28305	0.477447	2
257sh-1	EXE55_RS28310	0.605761	2
257sh-1	EXE55_RS28315	0.584032	1224
257sh-1	EXE55_RS28320	0.591835	1224
257sh-1	EXE55_RS28335	0.580828	1224
257sh-1	EXE55_RS28350	0.58312	169430
257sh-1	EXE55_RS28360	0.615727	80840
257sh-1	EXE55_RS28365	0.578722	1544867
257sh-1	EXE55_RS28370	0.607581	80840
257sh-1	EXE55_RS28390	0.609483	80840
257sh-1	EXE55_RS28415	0.597431	80840
257sh-1	EXE55_RS28430	0.586844	80840
257sh-1	EXE55_RS28460	0.555892	119060
257sh-1	EXE55_RS28485	0.532352	119060
257sh-1	EXE55_RS28510	0.570594	80840
257sh-1	EXE55_RS28530	0.612465	119060
257sh-1	EXE55_RS28555	0.605188	2731212
257sh-1	EXE55_RS28565	0.565832	119060
257sh-1	EXE55_RS28570	0.50324	119060
257sh-1	EXE55_RS28680	0.58584	119060
257sh-1	EXE55_RS28685	0.591218	119060
257sh-1	EXE55_RS28720	0.548754	119060
257sh-1	EXE55_RS28730	0.556279	119060
257sh-1	EXE55_RS28750	0.556826	80840
257sh-1	EXE55_RS28755	0.590516	119060
257sh-1	EXE55_RS28770	0.556279	119060
257sh-1	EXE55_RS28800	0.557868	119060
257sh-1	EXE55_RS30020	0.603551	1224
257sh-1	EXE55_RS28885	0.589293	80840
257sh-1	EXE55_RS28910	0.586555	80840
257sh-1	EXE55_RS28915	0.619408	80840
257sh-1	EXE55_RS28920	0.600403	28211
257sh-1	EXE55_RS28930	0.55871	2
257sh-1	EXE55_RS28935	0.600281	1822464
257sh-1	EXE55_RS28950	0.542525	80840
257sh-1	EXE55_RS28990	0.461715	119060
257sh-1	EXE55_RS28995	0.562433	119060
257sh-1	EXE55_RS29015	0.512301	2
257sh-1	EXE55_RS29035	0.551748	119060
257sh-1	EXE55_RS29045	0.608645	984307
257sh-1	EXE55_RS29055	0.504015	1822464
257sh-1	EXE55_RS29065	0.538942	119060
257sh-1	EXE55_RS30040	0.619594	984307
257sh-1	EXE55_RS29100	0.530586	119060
257sh-1	EXE55_RS29120	0.529158	106589
257sh-1	EXE55_RS29140	0.58534	80840
257sh-1	EXE55_RS29160	0.579769	1224
257sh-1	EXE55_RS29175	0.554527	119060
257sh-1	EXE55_RS29185	0.619171	80840
257sh-1	EXE55_RS29195	0.585162	80840
257sh-1	EXE55_RS29230	0.555892	119060
257sh-1	EXE55_RS29255	0.532352	119060
3252-8	D589_RS00005	0.568175	1822464
3252-8	D589_RS00015	0.513823	1224
3252-8	D589_RS00020	0.438164	80840
3252-8	D589_RS00025	0.625653	119060
3252-8	D589_RS00040	0.574582	1792498
3252-8	D589_RS00045	0.548141	1224
3252-8	D589_RS00050	0.535134	1224
3252-8	D589_RS00170	0.567649	80840
3252-8	D589_RS00175	0.569475	2014887
3252-8	D589_RS00205	0.531689	80840
3252-8	D589_RS00210	0.536208	1224
3252-8	D589_RS00215	0.582673	1224
3252-8	D589_RS00220	0.528574	80840
3252-8	D589_RS00440	0.594685	119060
3252-8	D589_RS00555	0.580891	119060
3252-8	D589_RS00560	0.507902	1224
3252-8	D589_RS00580	0.617537	28216
3252-8	D589_RS00590	0.62855	80840
3252-8	D589_RS00595	0.625611	80840
3252-8	D589_RS00610	0.63271	80840
3252-8	D589_RS00635	0.628604	119060
3252-8	D589_RS00665	0.534626	871203
3252-8	D589_RS00675	0.62089	80840
3252-8	D589_RS00680	0.598398	119060
3252-8	D589_RS00685	0.523741	119060
3252-8	D589_RS00840	0.560319	1224
3252-8	D589_RS00890	0.614731	222
3252-8	D589_RS00895	0.562488	1224
3252-8	D589_RS00910	0.507929	1224
3252-8	D589_RS00915	0.609603	28216
3252-8	D589_RS00920	0.560273	1224
3252-8	D589_RS00930	0.588189	28216
3252-8	D589_RS00960	0.601085	28216
3252-8	D589_RS00965	0.570157	1224
3252-8	D589_RS00990	0.585209	28216
3252-8	D589_RS00995	0.615017	28216
3252-8	D589_RS01005	0.626589	28216
3252-8	D589_RS01015	0.5811	28216
3252-8	D589_RS01020	0.626352	28216
3252-8	D589_RS01025	0.62533	28216
3252-8	D589_RS01040	0.614584	1224
3252-8	D589_RS01045	0.507273	93217
3252-8	D589_RS01060	0.615812	28216
3252-8	D589_RS01065	0.611593	28216
3252-8	D589_RS01080	0.559146	1224
3252-8	D589_RS01085	0.546155	2
3252-8	D589_RS01100	0.578561	1224
3252-8	D589_RS29620	0.578074	119060
3252-8	D589_RS01140	0.598486	265293
3252-8	D589_RS01245	0.597757	265293
3252-8	D589_RS01250	0.541214	265293
3252-8	D589_RS01255	0.607069	265293
3252-8	D589_RS01260	0.599431	265293
3252-8	D589_RS01325	0.603894	1822464
3252-8	D589_RS01330	0.578321	1822464
3252-8	D589_RS01335	0.601307	119060
3252-8	D589_RS01340	0.592548	119060
3252-8	D589_RS01355	0.595229	1224
3252-8	D589_RS29645	0.631412	1224
3252-8	D589_RS01360	0.579321	119060
3252-8	D589_RS01380	0.546417	1224
3252-8	D589_RS01390	0.546758	2152891
3252-8	D589_RS01395	0.535921	1822464
3252-8	D589_RS01435	0.533713	1822464
3252-8	D589_RS01450	0.506559	119060
3252-8	D589_RS01565	0.603859	119060
3252-8	D589_RS01575	0.619091	80840
3252-8	D589_RS01625	0.598005	1218081
3252-8	D589_RS01640	0.556251	1218081
3252-8	D589_RS01705	0.62778	926
3252-8	D589_RS01710	0.605399	926
3252-8	D589_RS01725	0.509284	926
3252-8	D589_RS01730	0.558313	926
3252-8	D589_RS29685	0.609898	926
3252-8	D589_RS29705	0.630723	80840
3252-8	D589_RS01790	0.596515	28211
3252-8	D589_RS01795	0.587927	28211
3252-8	D589_RS01800	0.627849	28211
3252-8	D589_RS01805	0.63255	119060
3252-8	D589_RS01875	0.620424	1224
3252-8	D589_RS01915	0.573587	1224
3252-8	D589_RS01925	0.5704	119060
3252-8	D589_RS01955	0.616017	1224
3252-8	D589_RS01965	0.618803	1224
3252-8	D589_RS01970	0.605352	1224
3252-8	D589_RS02000	0.565594	1224
3252-8	D589_RS02005	0.574335	28216
3252-8	D589_RS02010	0.512956	1826671
3252-8	D589_RS02015	0.592512	1224
3252-8	D589_RS02025	0.558665	1224
3252-8	D589_RS02035	0.585251	219649
3252-8	D589_RS02195	0.609852	1822464
3252-8	D589_RS02220	0.528875	1224
3252-8	D589_RS02425	0.57392	1224
3252-8	D589_RS29750	0.506436	1822464
3252-8	D589_RS02645	0.585365	119060
3252-8	D589_RS02650	0.520381	119060
3252-8	D589_RS02655	0.576234	119060
3252-8	D589_RS02660	0.521401	119060
3252-8	D589_RS02670	0.57099	119060
3252-8	D589_RS02675	0.630304	119060
3252-8	D589_RS02685	0.528982	119060
3252-8	D589_RS02690	0.610539	119060
3252-8	D589_RS02810	0.316283	1224
3252-8	D589_RS02815	0.381512	1224
3252-8	D589_RS02925	0.272993	1224
3252-8	D589_RS03165	0.627719	119060
3252-8	D589_RS03170	0.558438	119060
3252-8	D589_RS03175	0.620951	119060
3252-8	D589_RS03190	0.622859	119060
3252-8	D589_RS03195	0.602543	28092
3252-8	D589_RS03200	0.613472	227292
3252-8	D589_RS03235	0.614496	1224
3252-8	D589_RS03240	0.586158	80840
3252-8	D589_RS03315	0.616679	1822464
3252-8	D589_RS03350	0.337712	1224
3252-8	D589_RS03500	0.540882	119060
3252-8	D589_RS03560	0.623787	1224
3252-8	D589_RS03580	0.604563	119060
3252-8	D589_RS03590	0.587334	2571160
3252-8	D589_RS03600	0.567872	119060
3252-8	D589_RS03605	0.611073	119060
3252-8	D589_RS03620	0.515219	119060
3252-8	D589_RS03625	0.6312	1218076
3252-8	D589_RS03630	0.541727	119060
3252-8	D589_RS03650	0.558949	119060
3252-8	D589_RS03695	0.52425	265293
3252-8	D589_RS03700	0.592165	265293
3252-8	D589_RS03705	0.620058	265293
3252-8	D589_RS03715	0.632559	28216
3252-8	D589_RS03720	0.605865	28216
3252-8	D589_RS03725	0.6169	1224
3252-8	D589_RS03735	0.353663	1224
3252-8	D589_RS03805	0.416447	1224
3252-8	D589_RS03810	0.354556	1224
3252-8	D589_RS03825	0.541761	2
3252-8	D589_RS03835	0.501575	564714
3252-8	D589_RS29845	0.504958	48736
3252-8	D589_RS03860	0.501081	535
3252-8	D589_RS03865	0.544342	1108595
3252-8	D589_RS03880	0.609262	119060
3252-8	D589_RS03885	0.603687	119060
3252-8	D589_RS03890	0.500406	28216
3252-8	D589_RS04040	0.608181	1224
3252-8	D589_RS04045	0.629948	1224
3252-8	D589_RS04050	0.628938	91347
3252-8	D589_RS04055	0.541836	1224
3252-8	D589_RS04215	0.541216	119060
3252-8	D589_RS04225	0.528302	1822464
3252-8	D589_RS04330	0.626444	2
3252-8	D589_RS04335	0.614726	2
3252-8	D589_RS29865	0.61664	2
3252-8	D589_RS04340	0.617906	2
3252-8	D589_RS29380	0.614575	2
3252-8	D589_RS29885	0.535216	131567
3252-8	D589_RS29900	0.624898	1224
3252-8	D589_RS04355	0.620609	119060
3252-8	D589_RS04425	0.613101	984307
3252-8	D589_RS04535	0.515252	119060
3252-8	D589_RS04545	0.608846	119060
3252-8	D589_RS04550	0.580245	1224
3252-8	D589_RS04635	0.618326	28211
3252-8	D589_RS04645	0.341763	1224
3252-8	D589_RS04650	0.53683	1224
3252-8	D589_RS04655	0.569967	1903411
3252-8	D589_RS04660	0.612797	93217
3252-8	D589_RS04665	0.61045	1903411
3252-8	D589_RS04670	0.590332	1903411
3252-8	D589_RS04680	0.59226	2
3252-8	D589_RS04770	0.601127	119060
3252-8	D589_RS04775	0.514136	265293
3252-8	D589_RS04800	0.62749	93217
3252-8	D589_RS04830	0.606846	286
3252-8	D589_RS04835	0.619288	1760
3252-8	D589_RS04840	0.627931	1883
3252-8	D589_RS04845	0.592933	2070
3252-8	D589_RS04860	0.591644	2
3252-8	D589_RS04875	0.602283	1822464
3252-8	D589_RS04880	0.632693	1224
3252-8	D589_RS04950	0.341551	1224
3252-8	D589_RS05170	0.588817	28216
3252-8	D589_RS05175	0.60854	28216
3252-8	D589_RS05195	0.327434	1224
3252-8	D589_RS05220	0.314079	1224
3252-8	D589_RS05225	0.391478	1224
3252-8	D589_RS05240	0.604598	1224
3252-8	D589_RS05280	0.388895	1224
3252-8	D589_RS05290	0.390186	1224
3252-8	D589_RS05305	0.289926	1224
3252-8	D589_RS05440	0.625081	1245436
3252-8	D589_RS05475	0.617797	28216
3252-8	D589_RS05490	0.603997	1224
3252-8	D589_RS05545	0.53188	363844
3252-8	D589_RS05555	0.593439	80840
3252-8	D589_RS05560	0.576014	1224
3252-8	D589_RS05565	0.623079	1224
3252-8	D589_RS05590	0.631141	28211
3252-8	D589_RS05615	0.624482	28216
3252-8	D589_RS05625	0.589144	28216
3252-8	D589_RS05975	0.625502	119060
3252-8	D589_RS05980	0.600939	1760
3252-8	D589_RS05995	0.54782	119060
3252-8	D589_RS06005	0.626821	119060
3252-8	D589_RS06010	0.597929	857265
3252-8	D589_RS06015	0.62652	1236
3252-8	D589_RS06020	0.616084	2
3252-8	D589_RS06025	0.608033	2026199
3252-8	D589_RS06120	0.615703	28216
3252-8	D589_RS06135	0.532874	1224
3252-8	D589_RS06140	0.591188	2
3252-8	D589_RS06145	0.626324	1224
3252-8	D589_RS06150	0.627471	1224
3252-8	D589_RS06210	0.509501	28092
3252-8	D589_RS06255	0.540445	1224
3252-8	D589_RS06340	0.526099	119060
3252-8	D589_RS06355	0.528671	119060
3252-8	D589_RS06480	0.544346	1224
3252-8	D589_RS06485	0.623739	1822464
3252-8	D589_RS06490	0.628479	312026
3252-8	D589_RS06495	0.614476	1822464
3252-8	D589_RS06500	0.528048	119060
3252-8	D589_RS06590	0.537808	1822464
3252-8	D589_RS06635	0.529053	1224
3252-8	D589_RS06660	0.593445	1224
3252-8	D589_RS06665	0.521344	28211
3252-8	D589_RS06670	0.631038	480658
3252-8	D589_RS06680	0.631906	28094
3252-8	D589_RS06685	0.607835	1224
3252-8	D589_RS06710	0.500266	1224
3252-8	D589_RS06750	0.615753	1822464
3252-8	D589_RS06755	0.392238	1822464
3252-8	D589_RS06760	0.49157	1822464
3252-8	D589_RS06765	0.448103	1224
3252-8	D589_RS06790	0.511649	119060
3252-8	D589_RS06800	0.554891	119060
3252-8	D589_RS06805	0.546742	119060
3252-8	D589_RS06820	0.546773	119060
3252-8	D589_RS06825	0.559733	119060
3252-8	D589_RS06845	0.553313	2
3252-8	D589_RS06905	0.604844	1224
3252-8	D589_RS07125	0.553754	1822464
3252-8	D589_RS07145	0.522645	119060
3252-8	D589_RS07270	0.525759	266265
3252-8	D589_RS07285	0.519304	28216
3252-8	D589_RS07315	0.508588	1822464
3252-8	D589_RS30055	0.587168	119060
3252-8	D589_RS07340	0.603546	2292265
3252-8	D589_RS07350	0.613538	2292265
3252-8	D589_RS07395	0.539743	119060
3252-8	D589_RS07400	0.522199	119060
3252-8	D589_RS07590	0.351674	1224
3252-8	D589_RS07625	0.327559	1224
3252-8	D589_RS07655	0.52284	119060
3252-8	D589_RS07755	0.554681	1224
3252-8	D589_RS07865	0.533247	1324617
3252-8	D589_RS07870	0.539154	1324617
3252-8	D589_RS07885	0.552181	1324617
3252-8	D589_RS07890	0.516493	1324617
3252-8	D589_RS07895	0.537132	665038
3252-8	D589_RS07925	0.595691	119060
3252-8	D589_RS07930	0.50766	119060
3252-8	D589_RS07935	0.512207	119060
3252-8	D589_RS07975	0.628277	119060
3252-8	D589_RS08015	0.59533	119060
3252-8	D589_RS08020	0.579851	2419777
3252-8	D589_RS30125	0.520035	80840
3252-8	D589_RS08025	0.513192	119060
3252-8	D589_RS08135	0.535065	1224
3252-8	D589_RS08140	0.511631	1224
3252-8	D589_RS08145	0.609958	1224
3252-8	D589_RS08150	0.548331	626
3252-8	D589_RS08160	0.55173	2
3252-8	D589_RS30150	0.543286	1822464
3252-8	D589_RS08505	0.607651	1349767
3252-8	D589_RS08515	0.591386	1224
3252-8	D589_RS08525	0.504765	29
3252-8	D589_RS08540	0.564028	1218075
3252-8	D589_RS08550	0.623156	119060
3252-8	D589_RS08570	0.596223	1224
3252-8	D589_RS08605	0.523274	119060
3252-8	D589_RS08610	0.630812	1827195
3252-8	D589_RS08690	0.6088	1224
3252-8	D589_RS08755	0.5393	1822464
3252-8	D589_RS08760	0.504756	1224
3252-8	D589_RS08765	0.486194	1224
3252-8	D589_RS08770	0.395461	1224
3252-8	D589_RS08810	0.609104	80840
3252-8	D589_RS08815	0.450538	1224
3252-8	D589_RS08820	0.632906	80840
3252-8	D589_RS08825	0.629386	80840
3252-8	D589_RS08830	0.631779	80840
3252-8	D589_RS08835	0.390046	1224
3252-8	D589_RS08920	0.592338	420952
3252-8	D589_RS08950	0.567513	2603818
3252-8	D589_RS09130	0.615973	119060
3252-8	D589_RS09135	0.606952	1783272
3252-8	D589_RS09350	0.59123	2
3252-8	D589_RS09355	0.548648	2419777
3252-8	D589_RS09360	0.604346	2419777
3252-8	D589_RS09365	0.601475	2419777
3252-8	D589_RS09370	0.606906	2419777
3252-8	D589_RS09375	0.538559	1760
3252-8	D589_RS09380	0.623465	1224
3252-8	D589_RS09385	0.477692	2
3252-8	D589_RS09390	0.57017	119060
3252-8	D589_RS09405	0.393287	1224
3252-8	D589_RS09410	0.448133	1224
3252-8	D589_RS09415	0.551656	1224
3252-8	D589_RS09420	0.438074	1224
3252-8	D589_RS09425	0.570873	1224
3252-8	D589_RS09435	0.509869	984307
3252-8	D589_RS09490	0.454086	28216
3252-8	D589_RS09500	0.464737	1224
3252-8	D589_RS09595	0.523897	28216
3252-8	D589_RS09600	0.631015	1224
3252-8	D589_RS09605	0.55575	28216
3252-8	D589_RS09610	0.630953	1224
3252-8	D589_RS09615	0.53149	28216
3252-8	D589_RS09620	0.626094	28216
3252-8	D589_RS09630	0.507208	28216
3252-8	D589_RS09635	0.630206	2
3252-8	D589_RS09640	0.560066	1224
3252-8	D589_RS09685	0.569741	28216
3252-8	D589_RS09690	0.580166	1224
3252-8	D589_RS09695	0.518121	1224
3252-8	D589_RS09700	0.474628	1224
3252-8	D589_RS09705	0.520342	1224
3252-8	D589_RS09710	0.620223	80840
3252-8	D589_RS09715	0.623326	1224
3252-8	D589_RS09720	0.623855	80840
3252-8	D589_RS09900	0.61189	2
3252-8	D589_RS09945	0.503778	119060
3252-8	D589_RS09950	0.622971	80840
3252-8	D589_RS09955	0.487445	2
3252-8	D589_RS09975	0.328359	1224
3252-8	D589_RS30220	0.624289	1224
3252-8	D589_RS30225	0.502201	1400861
3252-8	D589_RS10130	0.53833	1822464
3252-8	D589_RS10175	0.529991	1224
3252-8	D589_RS10205	0.603639	1822464
3252-8	D589_RS10375	0.625473	80840
3252-8	D589_RS10385	0.54899	2
3252-8	D589_RS30250	0.61706	1224
3252-8	D589_RS10475	0.507265	80840
3252-8	D589_RS10480	0.613877	1224
3252-8	D589_RS10485	0.590645	80840
3252-8	D589_RS10490	0.54653	2026239
3252-8	D589_RS10495	0.566359	119060
3252-8	D589_RS10570	0.571461	1224
3252-8	D589_RS10590	0.514527	119060
3252-8	D589_RS10595	0.404839	1224
3252-8	D589_RS10685	0.62135	1408420
3252-8	D589_RS10695	0.593167	984307
3252-8	D589_RS10710	0.52544	1224
3252-8	D589_RS10760	0.520859	1236
3252-8	D589_RS10765	0.565119	321895
3252-8	D589_RS10775	0.555093	119060
3252-8	D589_RS10825	0.617347	1224
3252-8	D589_RS10830	0.551136	1822464
3252-8	D589_RS10835	0.55768	119060
3252-8	D589_RS10840	0.572791	1822464
3252-8	D589_RS10845	0.59743	1822464
3252-8	D589_RS10850	0.6095	1822464
3252-8	D589_RS11090	0.528334	1224
3252-8	D589_RS11095	0.601879	1224
3252-8	D589_RS11100	0.543165	1218075
3252-8	D589_RS11120	0.573972	119060
3252-8	D589_RS11135	0.547999	1218075
3252-8	D589_RS11320	0.55019	2
3252-8	D589_RS11325	0.631491	2
3252-8	D589_RS11335	0.502584	29487
3252-8	D589_RS11410	0.627547	1822464
3252-8	D589_RS11415	0.612385	1822464
3252-8	D589_RS11430	0.563478	80840
3252-8	D589_RS11455	0.507171	119060
3252-8	D589_RS11635	0.562272	119060
3252-8	D589_RS11800	0.616279	2
3252-8	D589_RS11810	0.543708	1224
3252-8	D589_RS11920	0.610277	984307
3252-8	D589_RS30310	0.621763	1822464
3252-8	D589_RS11940	0.588404	1224
3252-8	D589_RS11945	0.458859	1224
3252-8	D589_RS11950	0.629847	1224
3252-8	D589_RS11960	0.626279	1822464
3252-8	D589_RS11965	0.537215	1822464
3252-8	D589_RS30315	0.557414	119060
3252-8	D589_RS12035	0.518854	119060
3252-8	D589_RS12045	0.564501	265293
3252-8	D589_RS12055	0.621048	265293
3252-8	D589_RS12110	0.521355	119060
3252-8	D589_RS30325	0.501462	2
3252-8	D589_RS12160	0.604344	1822464
3252-8	D589_RS12185	0.537031	80840
3252-8	D589_RS12205	0.627563	1156985
3252-8	D589_RS12230	0.602884	80840
3252-8	D589_RS12235	0.597068	119060
3252-8	D589_RS12250	0.561563	1822464
3252-8	D589_RS12300	0.613956	1224
3252-8	D589_RS12390	0.624723	2
3252-8	D589_RS30345	0.59815	80840
3252-8	D589_RS12670	0.630737	1822464
3252-8	D589_RS12675	0.450492	28216
3252-8	D589_RS12685	0.57388	80840
3252-8	D589_RS12705	0.614274	2
3252-8	D589_RS31380	0.559349	1822464
3252-8	D589_RS12745	0.614899	1224
3252-8	D589_RS13045	0.570938	119060
3252-8	D589_RS13120	0.510695	2
3252-8	D589_RS13265	0.627124	1822464
3252-8	D589_RS13495	0.626203	119060
3252-8	D589_RS13580	0.623742	119060
3252-8	D589_RS13585	0.604441	1822464
3252-8	D589_RS13765	0.547766	119060
3252-8	D589_RS13770	0.531048	119060
3252-8	D589_RS13780	0.618925	28216
3252-8	D589_RS13795	0.556927	1224
3252-8	D589_RS13815	0.531153	1822464
3252-8	D589_RS13845	0.527948	80840
3252-8	D589_RS13855	0.617905	417203
3252-8	D589_RS32200	0.59686	80840
3252-8	D589_RS13935	0.58035	2571748
3252-8	D589_RS13940	0.599252	1822464
3252-8	D589_RS13945	0.559728	1822464
3252-8	D589_RS13950	0.510409	119060
3252-8	D589_RS30430	0.632155	1822464
3252-8	D589_RS13985	0.607703	119060
3252-8	D589_RS14000	0.528214	28216
3252-8	D589_RS14005	0.564959	1822464
3252-8	D589_RS14185	0.556271	1224
3252-8	D589_RS14500	0.529811	1224
3252-8	D589_RS14505	0.485801	1224
3252-8	D589_RS14510	0.521847	1224
3252-8	D589_RS14525	0.54935	1224
3252-8	D589_RS14660	0.404044	1224
3252-8	D589_RS14735	0.602467	1822464
3252-8	D589_RS14740	0.622569	1822464
3252-8	D589_RS14770	0.519889	119060
3252-8	D589_RS14815	0.626841	1224
3252-8	D589_RS14865	0.598601	1177169
3252-8	D589_RS14870	0.613354	1177169
3252-8	D589_RS15145	0.531094	2
3252-8	D589_RS15180	0.631034	119060
3252-8	D589_RS15195	0.546956	119060
3252-8	D589_RS15215	0.573181	1224
3252-8	D589_RS15220	0.619571	1236
3252-8	D589_RS15340	0.614316	80840
3252-8	D589_RS15345	0.524826	80840
3252-8	D589_RS15390	0.524633	1822464
3252-8	D589_RS15395	0.631704	1822464
3252-8	D589_RS15400	0.340129	1224
3252-8	D589_RS15440	0.516329	1224
3252-8	D589_RS15460	0.512365	119060
3252-8	D589_RS15585	0.588907	1224
3252-8	D589_RS15600	0.632808	28092
3252-8	D589_RS15615	0.603557	1224
3252-8	D589_RS15625	0.586824	119060
3252-8	D589_RS15655	0.586116	1822464
3252-8	D589_RS15665	0.613663	80840
3252-8	D589_RS15770	0.631459	1827195
3252-8	D589_RS15775	0.606031	1822464
3252-8	D589_RS15835	0.589084	1224
3252-8	D589_RS15915	0.618296	1224
3252-8	D589_RS15920	0.598498	28216
3252-8	D589_RS15980	0.435803	1224
3252-8	D589_RS15985	0.343788	1224
3252-8	D589_RS15990	0.431377	1224
3252-8	D589_RS15995	0.447725	1224
3252-8	D589_RS16060	0.536884	1224
3252-8	D589_RS16085	0.597674	1224
3252-8	D589_RS16100	0.508537	80840
3252-8	D589_RS16290	0.610445	1822464
3252-8	D589_RS16340	0.519703	1792498
3252-8	D589_RS16345	0.619919	1792498
3252-8	D589_RS16350	0.555301	1792498
3252-8	D589_RS16460	0.607203	1224
3252-8	D589_RS16465	0.444452	1224
3252-8	D589_RS16470	0.502578	1224
3252-8	D589_RS16490	0.600624	28092
3252-8	D589_RS16595	0.584825	119060
3252-8	D589_RS16620	0.522698	984307
3252-8	D589_RS16630	0.618168	1224
3252-8	D589_RS30555	0.538617	106589
3252-8	D589_RS17130	0.366219	1224
3252-8	D589_RS17190	0.490618	1224
3252-8	D589_RS17380	0.503012	93217
3252-8	D589_RS30600	0.583564	1224
3252-8	D589_RS30605	0.585626	1224
3252-8	D589_RS17465	0.626755	1224
3252-8	D589_RS17470	0.506573	1224
3252-8	D589_RS17500	0.504799	1224
3252-8	D589_RS17505	0.546283	119060
3252-8	D589_RS17520	0.500925	1224
3252-8	D589_RS17550	0.580665	119060
3252-8	D589_RS17555	0.630203	119060
3252-8	D589_RS17725	0.600607	2
3252-8	D589_RS17765	0.398689	1224
3252-8	D589_RS17770	0.498182	119060
3252-8	D589_RS17775	0.546195	119060
3252-8	D589_RS17780	0.627722	119060
3252-8	D589_RS17885	0.552069	1822464
3252-8	D589_RS17965	0.499519	2
3252-8	D589_RS18120	0.434968	119060
3252-8	D589_RS18145	0.589544	80840
3252-8	D589_RS18225	0.53394	1236
3252-8	D589_RS18235	0.517067	1236
3252-8	D589_RS18330	0.549719	1224
3252-8	D589_RS18340	0.612663	1224
3252-8	D589_RS18480	0.629367	1827195
3252-8	D589_RS18560	0.500377	119060
3252-8	D589_RS18785	0.4958	2
3252-8	D589_RS18790	0.565224	2
3252-8	D589_RS18855	0.620843	1822464
3252-8	D589_RS18990	0.536798	1224
3252-8	D589_RS19015	0.518011	1224
3252-8	D589_RS19050	0.627705	28092
3252-8	D589_RS19075	0.453256	1224
3252-8	D589_RS33130	0.576414	1224
3252-8	D589_RS19115	0.55816	119060
3252-8	D589_RS19145	0.618627	2603818
3252-8	D589_RS19185	0.510503	91347
3252-8	D589_RS19210	0.571535	1792498
3252-8	D589_RS19225	0.566034	1224
3252-8	D589_RS19230	0.479061	1224
3252-8	D589_RS19250	0.392518	1224
3252-8	D589_RS19325	0.626271	1822464
3252-8	D589_RS19330	0.612719	1822464
3252-8	D589_RS19380	0.506621	80840
3252-8	D589_RS19445	0.565503	119060
3252-8	D589_RS19450	0.523337	80840
3252-8	D589_RS19460	0.598007	93217
3252-8	D589_RS19470	0.613112	1236
3252-8	D589_RS19475	0.539055	1224
3252-8	D589_RS19500	0.351687	1224
3252-8	D589_RS19540	0.613687	338
3252-8	D589_RS19570	0.577116	119060
3252-8	D589_RS19615	0.629837	1822464
3252-8	D589_RS19620	0.586684	1224
3252-8	D589_RS19645	0.512177	1224
3252-8	D589_RS19665	0.632883	119060
3252-8	D589_RS19695	0.62006	80840
3252-8	D589_RS19730	0.547822	1224
3252-8	D589_RS19815	0.532392	1224
3252-8	D589_RS19820	0.500368	119060
3252-8	D589_RS19825	0.630079	119060
3252-8	D589_RS19830	0.512919	119060
3252-8	D589_RS19835	0.618338	2282883
3252-8	D589_RS19840	0.622771	2282883
3252-8	D589_RS19845	0.553287	80840
3252-8	D589_RS19850	0.60777	1224
3252-8	D589_RS19855	0.599026	28216
3252-8	D589_RS19925	0.450022	119060
3252-8	D589_RS19985	0.589338	1822464
3252-8	D589_RS20000	0.628857	28216
3252-8	D589_RS20065	0.6095	119060
3252-8	D589_RS20100	0.605791	119060
3252-8	D589_RS20105	0.628336	80840
3252-8	D589_RS20150	0.49205	80840
3252-8	D589_RS20310	0.62599	80840
3252-8	D589_RS20410	0.5736	28092
3252-8	D589_RS20455	0.626317	93217
3252-8	D589_RS20460	0.629012	1224
3252-8	D589_RS20465	0.572214	1224
3252-8	D589_RS20570	0.62577	1822464
3252-8	D589_RS20615	0.632429	119060
3252-8	D589_RS20620	0.550368	1224
3252-8	D589_RS20715	0.558967	119060
3252-8	D589_RS20765	0.570043	119060
3252-8	D589_RS20770	0.510993	119060
3252-8	D589_RS20800	0.567961	119060
3252-8	D589_RS20805	0.5753	80840
3252-8	D589_RS20810	0.504023	119060
3252-8	D589_RS20815	0.617898	119060
3252-8	D589_RS20860	0.605197	1792498
3252-8	D589_RS20870	0.581719	80840
3252-8	D589_RS20895	0.601588	1224
3252-8	D589_RS20950	0.401545	1224
3252-8	D589_RS20960	0.44203	80840
3252-8	D589_RS30765	0.537516	1224
3252-8	D589_RS21120	0.571933	119060
3252-8	D589_RS21125	0.580384	119060
3252-8	D589_RS21180	0.586382	1224
3252-8	D589_RS21185	0.574123	1822464
3252-8	D589_RS21335	0.539996	1349767
3252-8	D589_RS30815	0.603682	80840
3252-8	D589_RS21640	0.27076	1224
3252-8	D589_RS30825	0.621683	356
3252-8	D589_RS21700	0.610612	1224
3252-8	D589_RS21740	0.57622	2
3252-8	D589_RS21805	0.573414	80840
3252-8	D589_RS21845	0.371747	1224
3252-8	D589_RS21850	0.503799	1224
3252-8	D589_RS21895	0.630453	80840
3252-8	D589_RS21950	0.412653	1224
3252-8	D589_RS21955	0.343459	1224
3252-8	D589_RS22085	0.599893	1822464
3252-8	D589_RS22245	0.52245	80840
3252-8	D589_RS22250	0.582039	1224
3252-8	D589_RS22275	0.570126	1822464
3252-8	D589_RS22280	0.549771	1822464
3252-8	D589_RS22285	0.549584	1822464
3252-8	D589_RS22290	0.585755	1224
3252-8	D589_RS22310	0.536752	119060
3252-8	D589_RS22350	0.587096	1822464
3252-8	D589_RS22355	0.540187	1822464
3252-8	D589_RS22390	0.556772	80840
3252-8	D589_RS22450	0.461738	2
3252-8	D589_RS22535	0.517109	28216
3252-8	D589_RS22555	0.618154	119060
3252-8	D589_RS22610	0.52523	119060
3252-8	D589_RS22620	0.527233	1224
3252-8	D589_RS22705	0.532238	1224
3252-8	D589_RS22710	0.564514	119060
3252-8	D589_RS22745	0.472605	1224
3252-8	D589_RS22910	0.500728	1224
3252-8	D589_RS22940	0.404172	1224
3252-8	D589_RS22955	0.629002	1822464
3252-8	D589_RS23035	0.514617	119060
3252-8	D589_RS23085	0.573395	1224
3252-8	D589_RS23110	0.615365	1822464
3252-8	D589_RS23255	0.544737	2
3252-8	D589_RS23265	0.438619	1224
3252-8	D589_RS23295	0.528311	119060
3252-8	D589_RS23300	0.608134	1224
3252-8	D589_RS23315	0.546682	119060
3252-8	D589_RS23330	0.598469	1822464
3252-8	D589_RS23415	0.556899	119060
3252-8	D589_RS23485	0.585339	1224
3252-8	D589_RS23490	0.610202	1224
3252-8	D589_RS23495	0.595987	1224
3252-8	D589_RS23500	0.618689	1224
3252-8	D589_RS23640	0.477037	1822464
3252-8	D589_RS23670	0.553134	28216
3252-8	D589_RS23675	0.380729	119060
3252-8	D589_RS23680	0.523445	28216
3252-8	D589_RS23685	0.630708	1822464
3252-8	D589_RS23725	0.530828	119060
3252-8	D589_RS23745	0.519282	2
3252-8	D589_RS23820	0.565646	119060
3252-8	D589_RS23825	0.482108	119060
3252-8	D589_RS23940	0.506838	80840
3252-8	D589_RS24015	0.624538	1822464
3252-8	D589_RS24020	0.630132	1822464
3252-8	D589_RS24115	0.60897	119060
3252-8	D589_RS24120	0.591127	119060
3252-8	D589_RS24165	0.613886	1224
3252-8	D589_RS24210	0.511332	1224
3252-8	D589_RS24260	0.590663	2
3252-8	D589_RS24265	0.619859	1224
3252-8	D589_RS24545	0.547934	1224
3252-8	D589_RS24560	0.577793	1224
3252-8	D589_RS24570	0.616547	265293
3252-8	D589_RS24610	0.630998	119060
3252-8	D589_RS24630	0.629822	119060
3252-8	D589_RS24695	0.53241	1224
3252-8	D589_RS24765	0.622678	119060
3252-8	D589_RS24790	0.547898	882378
3252-8	D589_RS24810	0.623088	1224
3252-8	D589_RS24820	0.510026	1224
3252-8	D589_RS24830	0.605644	1912599
3252-8	D589_RS24870	0.429276	1224
3252-8	D589_RS24935	0.632096	80840
3252-8	D589_RS24950	0.565983	1224
3252-8	D589_RS25140	0.587777	1224
3252-8	D589_RS25145	0.632163	80840
3252-8	D589_RS25170	0.60123	1822464
3252-8	D589_RS25215	0.502638	119060
3252-8	D589_RS25360	0.570125	119060
3252-8	D589_RS25465	0.527995	2603818
3252-8	D589_RS25510	0.632292	1224
3252-8	D589_RS25515	0.609467	119060
3252-8	D589_RS25665	0.591445	119060
3252-8	D589_RS25700	0.611837	119060
3252-8	D589_RS25710	0.555049	80840
3252-8	D589_RS25715	0.526316	80840
3252-8	D589_RS25765	0.587743	1224
3252-8	D589_RS25780	0.597681	984307
3252-8	D589_RS25810	0.630523	80840
3252-8	D589_RS25845	0.574652	119060
3252-8	D589_RS25850	0.609442	119060
3252-8	D589_RS25920	0.544712	119060
3252-8	D589_RS25930	0.490626	119060
3252-8	D589_RS25940	0.522815	1224
3252-8	D589_RS26030	0.628685	1822464
3252-8	D589_RS26040	0.566987	506
3252-8	D589_RS26065	0.619611	2
3252-8	D589_RS26105	0.617285	1822464
3252-8	D589_RS26120	0.57571	119060
3252-8	D589_RS26195	0.495828	1224
3252-8	D589_RS26210	0.553186	1822464
3252-8	D589_RS26330	0.612454	1822464
3252-8	D589_RS26345	0.59587	2
3252-8	D589_RS26350	0.624545	80840
3252-8	D589_RS26400	0.616593	1224
3252-8	D589_RS31055	0.610684	1822464
3252-8	D589_RS26430	0.57693	2
3252-8	D589_RS26510	0.525511	119060
3252-8	D589_RS26530	0.605597	1822464
3252-8	D589_RS26560	0.569399	1224
3252-8	D589_RS26565	0.542754	1224
3252-8	D589_RS26575	0.631326	1224
3252-8	D589_RS26665	0.504738	1822464
3252-8	D589_RS26675	0.484076	1224
3252-8	D589_RS26700	0.586029	1224
3252-8	D589_RS26755	0.553032	28216
3252-8	D589_RS26800	0.627491	28216
3252-8	D589_RS26805	0.579942	1822464
3252-8	D589_RS26830	0.624289	2
3252-8	D589_RS26860	0.625315	984307
3252-8	D589_RS26895	0.615215	1822464
3252-8	D589_RS26900	0.562627	1349767
3252-8	D589_RS26975	0.529063	1224
3252-8	D589_RS27005	0.49983	1822464
3252-8	D589_RS31110	0.530392	119060
3252-8	D589_RS27170	0.581915	1224
3252-8	D589_RS27190	0.517575	1224
3252-8	D589_RS27235	0.611128	1912599
3252-8	D589_RS27260	0.552047	119060
3252-8	D589_RS27270	0.577965	1822464
3252-8	D589_RS27410	0.554182	1822464
3252-8	D589_RS27435	0.606809	1224
3252-8	D589_RS27440	0.517002	1224
3252-8	D589_RS27445	0.580529	1224
3252-8	D589_RS27470	0.459783	119060
3252-8	D589_RS27545	0.561984	1224
3252-8	D589_RS27560	0.505304	119060
3252-8	D589_RS27655	0.601172	1224
3252-8	D589_RS27670	0.602	1822464
3252-8	D589_RS27680	0.627262	28216
3252-8	D589_RS27690	0.604632	80840
3252-8	D589_RS27695	0.501802	1224
3252-8	D589_RS27715	0.624275	80840
3252-8	D589_RS27770	0.54029	119060
3252-8	D589_RS27805	0.611436	119060
3252-8	D589_RS27870	0.516706	119060
3252-8	D589_RS27880	0.584007	28092
3252-8	D589_RS27980	0.610491	1224
3252-8	D589_RS28005	0.622512	119060
3252-8	D589_RS28055	0.627593	80840
3252-8	D589_RS28060	0.497693	28216
3252-8	D589_RS28135	0.625118	1224
3252-8	D589_RS28140	0.541369	119060
3252-8	D589_RS28230	0.611949	2
3252-8	D589_RS28255	0.632404	119060
3252-8	D589_RS28295	0.522001	1224
3252-8	D589_RS28400	0.622523	1224
3252-8	D589_RS28405	0.572024	80840
3252-8	D589_RS28420	0.567883	119060
3252-8	D589_RS28500	0.498253	119060
3252-8	D589_RS28510	0.330765	1224
3252-8	D589_RS28540	0.615367	80840
3252-8	D589_RS28580	0.579257	1224
3252-8	D589_RS28590	0.519579	1224
3252-8	D589_RS28625	0.515127	1224
3252-8	D589_RS28665	0.546495	119060
3252-8	D589_RS28790	0.559125	1224
3252-8	D589_RS28815	0.533816	286
3252-8	D589_RS28855	0.545492	1224
3252-8	D589_RS28910	0.581659	1224
3252-8	D589_RS29135	0.556335	28216
3252-8	D589_RS32860	0.627652	80840
3252-8	D589_RS29175	0.525407	1224
3252-8	D589_RS29185	0.579975	80840
3252-8	D589_RS29270	0.500858	2291023
336gr-1	CG017_RS00145	0.259713	1224
336gr-1	CG017_RS00220	0.342576	1224
336gr-1	CG017_RS00405	0.519113	1224
336gr-1	CG017_RS00580	0.491706	1224
336gr-1	CG017_RS00685	0.623599	1827195
336gr-1	CG017_RS00790	0.59758	119060
336gr-1	CG017_RS00795	0.620797	1224
336gr-1	CG017_RS00815	0.519786	1822464
336gr-1	CG017_RS00945	0.533275	1822464
336gr-1	CG017_RS01065	0.610861	28216
336gr-1	CG017_RS01525	0.338089	1224
336gr-1	CG017_RS01530	0.397905	1224
336gr-1	CG017_RS01600	0.336806	1224
336gr-1	CG017_RS02205	0.450188	119060
336gr-1	CG017_RS02225	0.607528	1822464
336gr-1	CG017_RS02230	0.598524	1822464
336gr-1	CG017_RS02235	0.576039	1822464
336gr-1	CG017_RS02240	0.544667	119060
336gr-1	CG017_RS02245	0.537195	1822464
336gr-1	CG017_RS02250	0.604661	1224
336gr-1	CG017_RS02260	0.620491	1224
336gr-1	CG017_RS02285	0.54857	506
336gr-1	CG017_RS02290	0.464501	1224
336gr-1	CG017_RS02305	0.615367	80840
336gr-1	CG017_RS03475	0.620186	1218081
336gr-1	CG017_RS03480	0.567608	1822464
336gr-1	CG017_RS03535	0.587966	1224
336gr-1	CG017_RS03680	0.529971	2
336gr-1	CG017_RS03725	0.601342	1792498
336gr-1	CG017_RS04080	0.50336	119060
336gr-1	CG017_RS04245	0.257419	1224
336gr-1	CG017_RS04390	0.530377	1224
336gr-1	CG017_RS04455	0.623155	28216
336gr-1	CG017_RS04500	0.61857	1224
336gr-1	CG017_RS04505	0.544235	119060
336gr-1	CG017_RS04510	0.507662	119060
336gr-1	CG017_RS04520	0.60756	1224
336gr-1	CG017_RS04525	0.58967	1224
336gr-1	CG017_RS04550	0.507662	119060
336gr-1	CG017_RS04555	0.544364	119060
336gr-1	CG017_RS04580	0.523208	119060
336gr-1	CG017_RS04625	0.590345	1822464
336gr-1	CG017_RS04630	0.619025	119060
336gr-1	CG017_RS04700	0.594671	119060
336gr-1	CG017_RS04935	0.616547	1224
336gr-1	CG017_RS04980	0.545479	1224
336gr-1	CG017_RS05085	0.413583	1224
336gr-1	CG017_RS05300	0.611203	80840
336gr-1	CG017_RS05305	0.58775	1822464
336gr-1	CG017_RS05315	0.601523	80840
336gr-1	CG017_RS05345	0.482551	1224
336gr-1	CG017_RS05530	0.507649	1224
336gr-1	CG017_RS05835	0.311718	1224
336gr-1	CG017_RS05860	0.299112	1224
336gr-1	CG017_RS05865	0.373547	1224
336gr-1	CG017_RS05880	0.60411	1224
336gr-1	CG017_RS05890	0.300014	1224
336gr-1	CG017_RS05920	0.370966	1224
336gr-1	CG017_RS05930	0.372223	1224
336gr-1	CG017_RS05945	0.276031	1224
336gr-1	CG017_RS05960	0.339397	1224
336gr-1	CG017_RS06300	0.335147	1224
336gr-1	CG017_RS06375	0.549076	1224
336gr-1	CG017_RS06390	0.611073	28216
336gr-1	CG017_RS06395	0.582733	28216
336gr-1	CG017_RS06415	0.559781	1224
336gr-1	CG017_RS06425	0.572494	119060
336gr-1	CG017_RS06460	0.612434	1224
336gr-1	CG017_RS06475	0.607288	1224
336gr-1	CG017_RS06480	0.600687	1224
336gr-1	CG017_RS06510	0.569158	1224
336gr-1	CG017_RS06515	0.575578	1224
336gr-1	CG017_RS06525	0.591101	1224
336gr-1	CG017_RS06535	0.538026	1224
336gr-1	CG017_RS06560	0.507662	119060
336gr-1	CG017_RS06565	0.544364	119060
336gr-1	CG017_RS06605	0.545203	1224
336gr-1	CG017_RS06870	0.556871	119060
336gr-1	CG017_RS07530	0.344667	1224
336gr-1	CG017_RS07965	0.576273	1224
336gr-1	CG017_RS08225	0.62005	1224
336gr-1	CG017_RS08260	0.314915	1224
336gr-1	CG017_RS08325	0.536332	1224
336gr-1	CG017_RS08330	0.594246	1224
336gr-1	CG017_RS08335	0.58216	1218075
336gr-1	CG017_RS08345	0.549731	1218075
336gr-1	CG017_RS08360	0.576354	119060
336gr-1	CG017_RS08470	0.383334	1224
336gr-1	CG017_RS08660	0.565759	1822464
336gr-1	CG017_RS08935	0.595806	119060
336gr-1	CG017_RS08970	0.321575	1224
336gr-1	CG017_RS09045	0.54841	119060
336gr-1	CG017_RS09145	0.607596	1224
336gr-1	CG017_RS09150	0.61858	1224
336gr-1	CG017_RS09155	0.61751	91347
336gr-1	CG017_RS09160	0.545716	1224
336gr-1	CG017_RS09360	0.348901	1224
336gr-1	CG017_RS09540	0.532688	1224
336gr-1	CG017_RS09625	0.325595	1224
336gr-1	CG017_RS09760	0.530139	1224
336gr-1	CG017_RS09840	0.542217	1224
336gr-1	CG017_RS10040	0.48798	119060
336gr-1	CG017_RS10130	0.334912	1224
336gr-1	CG017_RS10180	0.545543	1224
336gr-1	CG017_RS10190	0.611249	2
336gr-1	CG017_RS10215	0.622499	1827195
336gr-1	CG017_RS10230	0.484116	1224
336gr-1	CG017_RS10235	0.604988	1224
336gr-1	CG017_RS10240	0.60317	119060
336gr-1	CG017_RS10245	0.484351	119060
336gr-1	CG017_RS10250	0.556977	80840
336gr-1	CG017_RS10255	0.572567	80840
336gr-1	CG017_RS10260	0.575434	28216
336gr-1	CG017_RS10270	0.615102	119060
336gr-1	CG017_RS10275	0.528607	1224
336gr-1	CG017_RS10280	0.569141	80840
336gr-1	CG017_RS10285	0.609134	2282883
336gr-1	CG017_RS10290	0.604395	2282883
336gr-1	CG017_RS10315	0.575769	80840
336gr-1	CG017_RS10330	0.385303	1224
336gr-1	CG017_RS10335	0.441833	2
336gr-1	CG017_RS10355	0.511941	119060
336gr-1	CG017_RS10365	0.546638	80840
336gr-1	CG017_RS10375	0.554072	2
336gr-1	CG017_RS10390	0.544498	1224
336gr-1	CG017_RS10395	0.477999	28216
336gr-1	CG017_RS10650	0.585252	1224
336gr-1	CG017_RS10655	0.597238	28216
336gr-1	CG017_RS10745	0.61443	1822464
336gr-1	CG017_RS10750	0.616232	1822464
336gr-1	CG017_RS10755	0.460824	1822464
336gr-1	CG017_RS10760	0.602001	1822464
336gr-1	CG017_RS10770	0.564988	558537
336gr-1	CG017_RS10870	0.617453	286
336gr-1	CG017_RS10890	0.508745	119060
336gr-1	CG017_RS10900	0.581133	119060
336gr-1	CG017_RS10965	0.615282	1822464
336gr-1	CG017_RS10985	0.618447	80840
336gr-1	CG017_RS11000	0.61381	2603818
336gr-1	CG017_RS11050	0.553045	1822464
336gr-1	CG017_RS11070	0.615459	80840
336gr-1	CG017_RS11080	0.503646	1224
336gr-1	CG017_RS11110	0.603151	1224
336gr-1	CG017_RS11115	0.624262	28094
336gr-1	CG017_RS11125	0.622605	480658
336gr-1	CG017_RS11130	0.510736	28211
336gr-1	CG017_RS11140	0.606696	1224
336gr-1	CG017_RS11145	0.521338	1822464
336gr-1	CG017_RS11150	0.619187	1822464
336gr-1	CG017_RS11155	0.620648	1822464
336gr-1	CG017_RS11160	0.622231	1822464
336gr-1	CG017_RS11165	0.616945	1822464
336gr-1	CG017_RS11170	0.50393	28216
336gr-1	CG017_RS11175	0.363147	119060
336gr-1	CG017_RS11180	0.534152	28216
336gr-1	CG017_RS11225	0.605851	2292265
336gr-1	CG017_RS11235	0.601362	2292265
336gr-1	CG017_RS11260	0.569391	119060
336gr-1	CG017_RS11270	0.50625	1822464
336gr-1	CG017_RS11300	0.544281	119060
336gr-1	CG017_RS11305	0.500904	1224
336gr-1	CG017_RS11310	0.508457	1224
336gr-1	CG017_RS11315	0.52979	1224
336gr-1	CG017_RS11325	0.512434	91347
336gr-1	CG017_RS11330	0.602535	984307
336gr-1	CG017_RS11360	0.620186	1218081
336gr-1	CG017_RS11365	0.567608	1822464
336gr-1	CG017_RS11380	0.605895	28216
336gr-1	CG017_RS11385	0.570708	1224
336gr-1	CG017_RS11390	0.439546	1224
336gr-1	CG017_RS11395	0.620225	1224
336gr-1	CG017_RS11545	0.506822	80840
336gr-1	CG017_RS11550	0.600063	80840
336gr-1	CG017_RS11710	0.323792	1224
336gr-1	CG017_RS11715	0.623651	1822464
336gr-1	CG017_RS11730	0.546594	1822464
336gr-1	CG017_RS11735	0.544235	119060
336gr-1	CG017_RS11740	0.507662	119060
336gr-1	CG017_RS11765	0.599223	80840
336gr-1	CG017_RS11870	0.364071	1224
336gr-1	CG017_RS11875	0.30089	1224
336gr-1	CG017_RS11915	0.580827	119060
336gr-1	CG017_RS11920	0.501646	119060
336gr-1	CG017_RS11925	0.57516	119060
336gr-1	CG017_RS11930	0.498177	119060
336gr-1	CG017_RS11940	0.568696	119060
336gr-1	CG017_RS11945	0.622999	119060
336gr-1	CG017_RS11955	0.531996	119060
336gr-1	CG017_RS11960	0.594819	119060
336gr-1	CG017_RS12160	0.549076	1224
336gr-1	CG017_RS12280	0.509721	1224
336gr-1	CG017_RS12440	0.611039	28216
336gr-1	CG017_RS12455	0.507662	119060
336gr-1	CG017_RS12460	0.544235	119060
336gr-1	CG017_RS12475	0.505109	1183425
336gr-1	CG017_RS12480	0.528329	2
336gr-1	CG017_RS12500	0.617397	1553431
336gr-1	CG017_RS12540	0.524697	1224
336gr-1	CG017_RS12565	0.538053	80840
336gr-1	CG017_RS12590	0.56206	1670619
336gr-1	CG017_RS12610	0.595808	80840
336gr-1	CG017_RS12615	0.593207	80840
336gr-1	CG017_RS12625	0.521928	80840
336gr-1	CG017_RS12635	0.544235	119060
336gr-1	CG017_RS12640	0.507662	119060
336gr-1	CG017_RS12810	0.584148	1224
336gr-1	CG017_RS12850	0.609709	119060
336gr-1	CG017_RS12860	0.618323	1224
336gr-1	CG017_RS12975	0.43747	1822464
336gr-1	CG017_RS13035	0.570915	119060
336gr-1	CG017_RS13120	0.524639	1224
336gr-1	CG017_RS13125	0.597506	1236
336gr-1	CG017_RS13135	0.608172	93217
336gr-1	CG017_RS13205	0.495902	119060
336gr-1	CG017_RS13210	0.624265	1218083
336gr-1	CG017_RS13215	0.595427	119060
336gr-1	CG017_RS13220	0.563253	1224
336gr-1	CG017_RS13235	0.53009	1224
336gr-1	CG017_RS13300	0.535888	1224
336gr-1	CG017_RS13355	0.509879	2
336gr-1	CG017_RS13365	0.526771	2
336gr-1	CG017_RS13380	0.519756	2
336gr-1	CG017_RS13390	0.507417	2
336gr-1	CG017_RS13440	0.609404	265293
336gr-1	CG017_RS13475	0.417845	1224
336gr-1	CG017_RS13505	0.613908	265293
336gr-1	CG017_RS13510	0.624102	265293
336gr-1	CG017_RS13545	0.613506	265293
336gr-1	CG017_RS13560	0.6078	265293
336gr-1	CG017_RS13570	0.565556	265293
336gr-1	CG017_RS13580	0.525777	119060
336gr-1	CG017_RS13605	0.61953	1822464
336gr-1	CG017_RS13620	0.501511	80840
336gr-1	CG017_RS13625	0.564606	1224
336gr-1	CG017_RS13635	0.622196	119060
336gr-1	CG017_RS13640	0.622968	1224
336gr-1	CG017_RS13645	0.556194	1822464
336gr-1	CG017_RS13720	0.538592	119060
336gr-1	CG017_RS13745	0.597361	80840
336gr-1	CG017_RS13870	0.62358	119060
336gr-1	CG017_RS13955	0.51587	1224
336gr-1	CG017_RS13960	0.526044	1224
336gr-1	CG017_RS13965	0.57467	1792498
336gr-1	CG017_RS13980	0.61633	119060
336gr-1	CG017_RS13985	0.419194	80840
336gr-1	CG017_RS13990	0.494168	1224
336gr-1	CG017_RS14000	0.573052	1822464
336gr-1	CG017_RS14005	0.553978	1822464
336gr-1	CG017_RS14015	0.577636	1822464
336gr-1	CG017_RS14020	0.562004	1822464
336gr-1	CG017_RS14030	0.563368	1822464
336gr-1	CG017_RS14035	0.502481	1822464
336gr-1	CG017_RS14045	0.441501	119060
336gr-1	CG017_RS14050	0.552057	1224
336gr-1	CG017_RS14055	0.539382	119060
336gr-1	CG017_RS14060	0.614199	1822464
336gr-1	CG017_RS14065	0.620445	1822464
336gr-1	CG017_RS14075	0.605682	1822464
336gr-1	CG017_RS14100	0.580733	80840
336gr-1	CG017_RS14145	0.509488	2
336gr-1	CG017_RS14155	0.452931	119060
336gr-1	CG017_RS14165	0.520797	28216
336gr-1	CG017_RS14730	0.620776	80840
336gr-1	CG017_RS14780	0.617318	80840
336gr-1	CG017_RS14840	0.523515	119060
336gr-1	CG017_RS14865	0.515256	119060
336gr-1	CG017_RS14900	0.31201	1224
336gr-1	CG017_RS14985	0.620133	1822464
336gr-1	CG017_RS15065	0.610704	80840
336gr-1	CG017_RS15420	0.613116	28216
336gr-1	CG017_RS15430	0.589327	28216
336gr-1	CG017_RS15485	0.522173	1224
336gr-1	CG017_RS15495	0.573746	1792498
336gr-1	CG017_RS15510	0.433558	2
336gr-1	CG017_RS15555	0.574178	80840
336gr-1	CG017_RS15605	0.544235	119060
336gr-1	CG017_RS15615	0.507662	119060
336gr-1	CG017_RS15620	0.544235	119060
336gr-1	CG017_RS16050	0.579214	1224
336gr-1	CG017_RS16090	0.505808	119060
336gr-1	CG017_RS16095	0.623038	1827195
336gr-1	CG017_RS16265	0.568501	119060
336gr-1	CG017_RS16535	0.623362	2
336gr-1	CG017_RS16545	0.528359	119060
336gr-1	CG017_RS16550	0.572565	119060
336gr-1	CG017_RS16565	0.553297	80840
336gr-1	CG017_RS16605	0.531882	1324617
336gr-1	CG017_RS16610	0.540979	1324617
336gr-1	CG017_RS16615	0.510543	1324617
336gr-1	CG017_RS16620	0.548195	1324617
336gr-1	CG017_RS16625	0.520157	1324617
336gr-1	CG017_RS16630	0.541531	665038
336gr-1	CG017_RS16870	0.623944	80840
336gr-1	CG017_RS16940	0.548039	119060
336gr-1	CG017_RS16960	0.587413	119060
336gr-1	CG017_RS16965	0.521944	265293
336gr-1	CG017_RS17005	0.621851	93217
336gr-1	CG017_RS17025	0.507567	80840
336gr-1	CG017_RS17055	0.541059	1822464
336gr-1	CG017_RS17070	0.577029	980631
336gr-1	CG017_RS17080	0.623806	28211
336gr-1	CG017_RS17110	0.597361	80840
336gr-1	CG017_RS17120	0.609082	1224
336gr-1	CG017_RS17125	0.5578	1224
336gr-1	CG017_RS17130	0.591914	80840
336gr-1	CG017_RS17310	0.483448	1224
336gr-1	CG017_RS17315	0.42548	1224
336gr-1	CG017_RS17320	0.601495	1224
336gr-1	CG017_RS17330	0.559625	119060
336gr-1	CG017_RS17365	0.506156	265293
336gr-1	CG017_RS17370	0.530104	265293
336gr-1	CG017_RS17375	0.594635	265293
336gr-1	CG017_RS17380	0.609103	265293
336gr-1	CG017_RS17390	0.624274	28216
336gr-1	CG017_RS17395	0.60287	28216
336gr-1	CG017_RS17400	0.602229	1224
336gr-1	CG017_RS17405	0.537933	119060
336gr-1	CG017_RS17435	0.538968	1822464
336gr-1	CG017_RS17440	0.486551	1224
336gr-1	CG017_RS17445	0.466695	1224
336gr-1	CG017_RS17450	0.375416	1224
336gr-1	CG017_RS17490	0.619416	1822464
336gr-1	CG017_RS17530	0.524295	1236
336gr-1	CG017_RS17535	0.561013	321895
336gr-1	CG017_RS17545	0.555485	119060
336gr-1	CG017_RS17565	0.507021	119060
336gr-1	CG017_RS17575	0.504172	119060
336gr-1	CG017_RS17580	0.555122	119060
336gr-1	CG017_RS17585	0.552236	119060
336gr-1	CG017_RS17595	0.500182	119060
336gr-1	CG017_RS17600	0.552969	119060
336gr-1	CG017_RS17605	0.552669	119060
336gr-1	CG017_RS17610	0.545456	119060
336gr-1	CG017_RS17715	0.608842	2
336gr-1	CG017_RS17750	0.57937	1224
336gr-1	CG017_RS17795	0.506611	119060
336gr-1	CG017_RS17870	0.594917	1822464
336gr-1	CG017_RS17895	0.529735	1224
336gr-1	CG017_RS18035	0.617168	28216
336gr-1	CG017_RS18055	0.606068	28216
336gr-1	CG017_RS18070	0.613174	80840
336gr-1	CG017_RS18155	0.583058	1822464
336gr-1	CG017_RS18185	0.415346	1224
336gr-1	CG017_RS18190	0.327423	1224
336gr-1	CG017_RS18195	0.415182	1224
336gr-1	CG017_RS18200	0.425064	1224
336gr-1	CG017_RS18205	0.592526	1224
336gr-1	CG017_RS18350	0.535131	1224
336gr-1	CG017_RS18355	0.605133	1224
336gr-1	CG017_RS18390	0.567608	1822464
336gr-1	CG017_RS18395	0.620186	1218081
336gr-1	CG017_RS18520	0.610666	93217
336gr-1	CG017_RS18540	0.610861	28216
336gr-1	CG017_RS18630	0.592964	1224
336gr-1	CG017_RS18635	0.622647	80840
336gr-1	CG017_RS18640	0.533976	1822464
336gr-1	CG017_RS18680	0.575988	1224
336gr-1	CG017_RS18730	0.491027	2
336gr-1	CG017_RS18755	0.588872	1822464
336gr-1	CG017_RS18760	0.618499	1822464
336gr-1	CG017_RS18765	0.60776	1822464
336gr-1	CG017_RS18770	0.515946	119060
336gr-1	CG017_RS18775	0.592157	1822464
336gr-1	CG017_RS18805	0.380707	1224
336gr-1	CG017_RS18810	0.478529	119060
336gr-1	CG017_RS18815	0.525461	119060
336gr-1	CG017_RS18820	0.615617	119060
336gr-1	CG017_RS18830	0.589758	1822464
336gr-1	CG017_RS18835	0.622243	80840
336gr-1	CG017_RS18840	0.526353	80840
336gr-1	CG017_RS18845	0.601586	119060
336gr-1	CG017_RS18850	0.605177	1783272
336gr-1	CG017_RS18905	0.510541	119060
336gr-1	CG017_RS18935	0.53121	119060
336gr-1	CG017_RS18955	0.533949	119060
336gr-1	CG017_RS18995	0.606463	984307
336gr-1	CG017_RS19060	0.525132	984307
336gr-1	CG017_RS19075	0.55536	1224
336gr-1	CG017_RS19080	0.419213	1224
336gr-1	CG017_RS19085	0.529982	1224
336gr-1	CG017_RS19090	0.429024	1224
336gr-1	CG017_RS19095	0.376877	2
336gr-1	CG017_RS19115	0.618007	119060
336gr-1	CG017_RS19245	0.61041	1224
336gr-1	CG017_RS19265	0.59056	119060
336gr-1	CG017_RS19280	0.568655	2571160
336gr-1	CG017_RS19290	0.5503	119060
336gr-1	CG017_RS19295	0.601	119060
336gr-1	CG017_RS19310	0.523192	119060
336gr-1	CG017_RS19315	0.623814	1218076
336gr-1	CG017_RS19320	0.538662	119060
336gr-1	CG017_RS19375	0.529911	119060
336gr-1	CG017_RS19385	0.614577	1224
336gr-1	CG017_RS19390	0.573402	2
336gr-1	CG017_RS19395	0.539603	1224
336gr-1	CG017_RS19400	0.526755	1224
336gr-1	CG017_RS19405	0.550873	1224
336gr-1	CG017_RS19410	0.604686	1224
336gr-1	CG017_RS19420	0.530703	1224
336gr-1	CG017_RS19475	0.614549	28211
336gr-1	CG017_RS19485	0.32604	1224
336gr-1	CG017_RS19490	0.523907	1224
336gr-1	CG017_RS19495	0.552305	1903411
336gr-1	CG017_RS19500	0.599965	93217
336gr-1	CG017_RS19505	0.598613	1903411
336gr-1	CG017_RS19510	0.592174	1903411
336gr-1	CG017_RS19520	0.574839	2
336gr-1	CG017_RS19535	0.470959	1224
336gr-1	CG017_RS19555	0.563955	119060
336gr-1	CG017_RS19570	0.600735	1822464
336gr-1	CG017_RS19575	0.624295	1224
336gr-1	CG017_RS19585	0.567387	80840
336gr-1	CG017_RS19600	0.543902	2
336gr-1	CG017_RS19610	0.504852	564714
336gr-1	CG017_RS19635	0.507231	48736
336gr-1	CG017_RS19650	0.503349	535
336gr-1	CG017_RS19655	0.543761	1108595
336gr-1	CG017_RS19670	0.593242	119060
336gr-1	CG017_RS19675	0.597762	119060
336gr-1	CG017_RS19680	0.505665	28216
336gr-1	CG017_RS19685	0.613271	119060
336gr-1	CG017_RS19730	0.557537	1224
336gr-1	CG017_RS19735	0.603309	1224
336gr-1	CG017_RS19740	0.61368	93217
336gr-1	CG017_RS19795	0.566134	119060
336gr-1	CG017_RS19800	0.607014	119060
336gr-1	CG017_RS19850	0.585338	1224
336gr-1	CG017_RS19855	0.582723	1224
336gr-1	CG017_RS19920	0.519677	119060
336gr-1	CG017_RS19970	0.574115	2
336gr-1	CG017_RS20010	0.393879	1224
336gr-1	CG017_RS20050	0.619917	1822464
336gr-1	CG017_RS20055	0.50841	1822464
336gr-1	CG017_RS20070	0.431307	28216
336gr-1	CG017_RS20075	0.623474	1822464
336gr-1	CG017_RS20105	0.574225	119060
336gr-1	CG017_RS20115	0.608403	1224
336gr-1	CG017_RS20120	0.527441	119060
336gr-1	CG017_RS20205	0.601547	119060
336gr-1	CG017_RS20210	0.560586	119060
336gr-1	CG017_RS20215	0.562579	119060
336gr-1	CG017_RS20220	0.619844	1224
336gr-1	CG017_RS20245	0.516927	1224
336gr-1	CG017_RS20255	0.569765	1822464
336gr-1	CG017_RS20285	0.624314	1827195
336gr-1	CG017_RS20295	0.598253	1822464
336gr-1	CG017_RS20545	0.620124	1822464
336gr-1	CG017_RS20550	0.517971	1822464
336gr-1	CG017_RS20560	0.560975	119060
336gr-1	CG017_RS20610	0.609456	1224
336gr-1	CG017_RS20625	0.540927	1236
336gr-1	CG017_RS20635	0.525	1236
336gr-1	CG017_RS20745	0.537795	1224
336gr-1	CG017_RS20815	0.535323	119060
336gr-1	CG017_RS20990	0.591195	119060
336gr-1	CG017_RS21050	0.523776	119060
336gr-1	CG017_RS21080	0.517659	2
336gr-1	CG017_RS21085	0.532575	1224
336gr-1	CG017_RS21090	0.526356	2
336gr-1	CG017_RS21095	0.53152	2
336gr-1	CG017_RS21100	0.506363	2
336gr-1	CG017_RS21245	0.586416	1224
336gr-1	CG017_RS21295	0.553056	1224
336gr-1	CG017_RS21300	0.449009	1224
336gr-1	CG017_RS21385	0.508745	119060
336gr-1	CG017_RS21390	0.575713	119060
[truncated: 15,121 more rows]
