# Supplementary material for: Next Generation Sequencing and Comparative Genomic Analysis Reveal Extreme Plasticity of Two Burkholderia glumae Strains HN1 and HN2
Source: Pathogens. 2022 Oct 30;11(11):1265. doi: 10.3390/pathogens11111265 (PMC9698995; doi:10.3390/pathogens11111265)
Supplement: Supplementary file 1 [file pathogens-11-01265-s001.zip › Table S7 information of 27 strains.xlsx]

## Sheet: raw_information
Raw information of 27 strains
#Organism Name	Organism Groups	Strain	Clade	Country	BioSample	BioProject	Assembly	Level	Size(Mb)	GC%	Replicons	WGS	Scaffolds	CDS	Release Date	GenBank FTP	RefSeq FTP
Burkholderia glumae	Bacteria;Proteobacteria;Betaproteobacteria	BGAZ P3	1	Malaysia	SAMN28690460	PRJNA842897	GCA_024348225.1	Contig	6.52502	68.2		JAMYCT01	499	5827	2022-07-20T00:00:00Z		ftp://ftp.ncbi.nlm.nih.gov/genomes/all/GCF/024/348/225/GCF_024348225.1_ASM2434822v1
Burkholderia glumae	Bacteria;Proteobacteria;Betaproteobacteria	BGAZ.K6	1	Malaysia	SAMN28688691	PRJNA842847	GCA_024348205.1	Contig	6.57222	68.3		JAMYCS01	210	5741	2022-07-20T00:00:00Z		ftp://ftp.ncbi.nlm.nih.gov/genomes/all/GCF/024/348/205/GCF_024348205.1_ASM2434820v1
Burkholderia glumae	Bacteria;Proteobacteria;Betaproteobacteria	Bp9029	1	Puerto Rico	SAMN09073276	PRJNA451205	GCA_003858055.1	Contig	6.32576	68.6		QTQU01	175	5374	2018-12-03T00:00:00Z	ftp://ftp.ncbi.nlm.nih.gov/genomes/all/GCA/003/858/055/GCA_003858055.1_ASM385805v1	ftp://ftp.ncbi.nlm.nih.gov/genomes/all/GCF/003/858/055/GCF_003858055.1_ASM385805v1
Burkholderia glumae	Bacteria;Proteobacteria;Betaproteobacteria	HN2	1	China	SAMN13005960	PRJNA576729	GCA_013122645.1	Complete	6.56008	68.3311	chromosome 1:NZ_CP052132.1/CP052132.1; chromosome 2:NZ_CP052133.1/CP052133.1; plasmid pbghn2:NZ_CP052134.1/CP052134.1		3	5289	2020-05-19T00:00:00Z	ftp://ftp.ncbi.nlm.nih.gov/genomes/all/GCA/013/122/645/GCA_013122645.1_ASM1312264v1	ftp://ftp.ncbi.nlm.nih.gov/genomes/all/GCF/013/122/645/GCF_013122645.1_ASM1312264v1
Burkholderia glumae	Bacteria;Proteobacteria;Betaproteobacteria	257sh-1	2	USA	SAMN10913710	PRJNA521805	GCA_009931375.1	Complete	6.69168	68.194	chromosome 1:NZ_CP035900.1/CP035900.1; chromosome 2:NZ_CP035901.1/CP035901.1; plasmid plas1:NZ_CP035902.1/CP035902.1; plasmid plas2:NZ_CP035903.1/CP035903.1		4	5625	2020-01-27T00:00:00Z	ftp://ftp.ncbi.nlm.nih.gov/genomes/all/GCA/009/931/375/GCA_009931375.1_ASM993137v1	ftp://ftp.ncbi.nlm.nih.gov/genomes/all/GCF/009/931/375/GCF_009931375.1_ASM993137v1
Burkholderia glumae	Bacteria;Proteobacteria;Betaproteobacteria	3252-8	2	Colombia	SAMN02469649	PRJNA178518	GCA_000365245.1	Contig	6.11578	67.7		AQOM01	1730	5579	2013-04-15T00:00:00Z	ftp://ftp.ncbi.nlm.nih.gov/genomes/all/GCA/000/365/245/GCA_000365245.1_Burkholderia_glumae_3252-8	ftp://ftp.ncbi.nlm.nih.gov/genomes/all/GCF/000/365/245/GCF_000365245.1_Burkholderia_glumae_3252-8
Burkholderia glumae	Bacteria;Proteobacteria;Betaproteobacteria	411gr-6	2	USA	SAMN06710899	PRJNA382586	GCA_013307145.1	Complete	6.74759	68.2382	chromosome 1:NZ_CP021157.1/CP021157.1; chromosome 2:NZ_CP021158.1/CP021158.1; plasmid unnamed1:NZ_CP021159.1/CP021159.1; plasmid unnamed2:NZ_CP021160.1/CP021160.1		4	5468	2020-06-09T00:00:00Z	ftp://ftp.ncbi.nlm.nih.gov/genomes/all/GCA/013/307/145/GCA_013307145.1_ASM1330714v1	ftp://ftp.ncbi.nlm.nih.gov/genomes/all/GCF/013/307/145/GCF_013307145.1_ASM1330714v1
Burkholderia glumae	Bacteria;Proteobacteria;Betaproteobacteria	AU6208	2	USA	SAMN13567886	PRJNA595825	GCA_009857095.1	Complete	6.53082	68.3857	chromosome au01:NZ_CP047315.1/CP047315.1; chromosome au02:NZ_CP047316.1/CP047316.1; plasmid pwszb:NZ_CP047317.1/CP047317.1		3	5436	2020-01-12T00:00:00Z	ftp://ftp.ncbi.nlm.nih.gov/genomes/all/GCA/009/857/095/GCA_009857095.1_ASM985709v1	ftp://ftp.ncbi.nlm.nih.gov/genomes/all/GCF/009/857/095/GCF_009857095.1_ASM985709v1
Burkholderia gladioli	Bacteria;Proteobacteria;Betaproteobacteria	BBB-01	2	Not applicable	SAMN17301201	PRJNA691633	GCA_016698705.1	Complete	8.20148	68.2365	chromosome 1:NZ_CP068049.1/CP068049.1; chromosome 2:NZ_CP068050.1/CP068050.1; plasmid p3:NZ_CP068051.1/CP068051.1		3	6924	2021-01-19T00:00:00Z	ftp://ftp.ncbi.nlm.nih.gov/genomes/all/GCA/016/698/705/GCA_016698705.1_ASM1669870v1	ftp://ftp.ncbi.nlm.nih.gov/genomes/all/GCF/016/698/705/GCF_016698705.1_ASM1669870v1
Burkholderia glumae	Bacteria;Proteobacteria;Betaproteobacteria	HN1	2	China	SAMN14694445	PRJNA576729	GCA_012974245.1	Complete	6.68041	68.0996	chromosome 1:NZ_CP052867.1/CP052867.1; chromosome 2:NZ_CP052864.1/CP052864.1; plasmid pBGHN1-1:NZ_CP052865.1/CP052865.1; plasmid pBGHN1-2:NZ_CP052866.1/CP052866.1; plasmid pBGHN1-3:NZ_CP052868.1/CP052868.1		5	5434	2020-05-05T00:00:00Z	ftp://ftp.ncbi.nlm.nih.gov/genomes/all/GCA/012/974/245/GCA_012974245.1_ASM1297424v1	ftp://ftp.ncbi.nlm.nih.gov/genomes/all/GCF/012/974/245/GCF_012974245.1_ASM1297424v1
Burkholderia glumae	Bacteria;Proteobacteria;Betaproteobacteria	60BGCRMSO31-5	2	Thailand	SAMN28557217	PRJNA839883	GCA_023702455.1	Scaffold	6.46147	68.5		JAMQEQ01	27	5515	2022-06-11T00:00:00Z	ftp://ftp.ncbi.nlm.nih.gov/genomes/all/GCA/023/702/455/GCA_023702455.1_ASM2370245v1	ftp://ftp.ncbi.nlm.nih.gov/genomes/all/GCF/023/702/455/GCF_023702455.1_ASM2370245v1
Burkholderia glumae	Bacteria;Proteobacteria;Betaproteobacteria	60BGCRWC8-5	2	Thailand	SAMN28557225	PRJNA839883	GCA_023702305.1	Scaffold	6.58953	68.3		JAMQEL01	14	5681	2022-06-11T00:00:00Z	ftp://ftp.ncbi.nlm.nih.gov/genomes/all/GCA/023/702/305/GCA_023702305.1_ASM2370230v1	ftp://ftp.ncbi.nlm.nih.gov/genomes/all/GCF/023/702/305/GCF_023702305.1_ASM2370230v1
Burkholderia glumae	Bacteria;Proteobacteria;Betaproteobacteria	60BGCRMSO3-5	3	Thailand	SAMN28557221	PRJNA839883	GCA_023702395.1	Scaffold	6.30921	68.7		JAMQEP01	12	5347	2022-06-11T00:00:00Z	ftp://ftp.ncbi.nlm.nih.gov/genomes/all/GCA/023/702/395/GCA_023702395.1_ASM2370239v1	ftp://ftp.ncbi.nlm.nih.gov/genomes/all/GCF/023/702/395/GCF_023702395.1_ASM2370239v1
Burkholderia glumae	Bacteria;Proteobacteria;Betaproteobacteria	GX	3	China	SAMN13005961	PRJNA576729	GCA_009578005.1	Complete	6.86615	68.1183	chromosome 1:NZ_CP045087.1/CP045087.1; chromosome 2:NZ_CP045088.1/CP045088.1; plasmid pWSGX1:NZ_CP045089.1/CP045089.1; plasmid pWSGX2:NZ_CP045090.1/CP045090.1; plasmid pWSGX3:NZ_CP045091.1/CP045091.1		5	5668	2019-11-05T00:00:00Z	ftp://ftp.ncbi.nlm.nih.gov/genomes/all/GCA/009/578/005/GCA_009578005.1_ASM957800v1	ftp://ftp.ncbi.nlm.nih.gov/genomes/all/GCF/009/578/005/GCF_009578005.1_ASM957800v1
Burkholderia glumae	Bacteria;Proteobacteria;Betaproteobacteria	ICMP-3729	3	Japan	SAMN15230488	PRJNA639294	GCA_013370285.1	Contig	6.62202	68.3		JABWEA01	4	5430	2020-06-23T00:00:00Z	ftp://ftp.ncbi.nlm.nih.gov/genomes/all/GCA/013/370/285/GCA_013370285.1_ASM1337028v1	ftp://ftp.ncbi.nlm.nih.gov/genomes/all/GCF/013/370/285/GCF_013370285.1_ASM1337028v1
Burkholderia glumae	Bacteria;Proteobacteria;Betaproteobacteria	60BGCRPA10-1	4	Thailand	SAMN28557224	PRJNA839883	GCA_023702355.1	Scaffold	6.58951	68.4		JAMQEM01	13	5605	2022-06-11T00:00:00Z	ftp://ftp.ncbi.nlm.nih.gov/genomes/all/GCA/023/702/355/GCA_023702355.1_ASM2370235v1	ftp://ftp.ncbi.nlm.nih.gov/genomes/all/GCF/023/702/355/GCF_023702355.1_ASM2370235v1
Burkholderia glumae	Bacteria;Proteobacteria;Betaproteobacteria	GR20004	4	Korea	SAMN29038836	PRJNA849006	GCA_024022955.1	Complete	7.02419	67.9507	chromosome 1:NZ_CP099587.1/CP099587.1; chromosome 2:NZ_CP099583.1/CP099583.1; plasmid unnamed1:NZ_CP099584.1/CP099584.1; plasmid unnamed2:NZ_CP099585.1/CP099585.1; plasmid unnamed3:NZ_CP099586.1/CP099586.1		5	6042	2022-06-29T00:00:00Z		ftp://ftp.ncbi.nlm.nih.gov/genomes/all/GCF/024/022/955/GCF_024022955.1_ASM2402295v1
Burkholderia glumae	Bacteria;Proteobacteria;Betaproteobacteria	336gr-1	4	USA	SAMN07411560	PRJNA394794	GCA_013307165.1	Complete	6.87934	68.1254	chromosome 1:NZ_CP023203.1/CP023203.1; chromosome 2:NZ_CP023204.1/CP023204.1; plasmid unnamed1:NZ_CP023205.1/CP023205.1; plasmid unnamed2:NZ_CP023206.1/CP023206.1; plasmid unnamed3:NZ_CP023207.1/CP023207.1		5	5772	2020-06-09T00:00:00Z	ftp://ftp.ncbi.nlm.nih.gov/genomes/all/GCA/013/307/165/GCA_013307165.1_ASM1330716v1	ftp://ftp.ncbi.nlm.nih.gov/genomes/all/GCF/013/307/165/GCF_013307165.1_ASM1330716v1
Burkholderia glumae	Bacteria;Proteobacteria;Betaproteobacteria	60BGCRMSO3-11	4	Thailand	SAMN28557223	PRJNA839883	GCA_023702315.1	Scaffold	6.56646	68.4		JAMQEN01	11	5511	2022-06-11T00:00:00Z	ftp://ftp.ncbi.nlm.nih.gov/genomes/all/GCA/023/702/315/GCA_023702315.1_ASM2370231v1	ftp://ftp.ncbi.nlm.nih.gov/genomes/all/GCF/023/702/315/GCF_023702315.1_ASM2370231v1
Burkholderia glumae	Bacteria;Proteobacteria;Betaproteobacteria	60BGCRMSO3-9	4	Thailand	SAMN28557222	PRJNA839883	GCA_023702415.1	Scaffold	6.56838	68.4		JAMQEO01	10	5523	2022-06-11T00:00:00Z	ftp://ftp.ncbi.nlm.nih.gov/genomes/all/GCA/023/702/415/GCA_023702415.1_ASM2370241v1	ftp://ftp.ncbi.nlm.nih.gov/genomes/all/GCF/023/702/415/GCF_023702415.1_ASM2370241v1
Burkholderia glumae	Bacteria;Proteobacteria;Betaproteobacteria	957856-41-c	4	USA	SAMN06710871	PRJNA382584	GCA_017858835.1	Complete	6.94821	68.1035	chromosome 1:NZ_CP021074.1/CP021074.1; chromosome 2:NZ_CP021075.1/CP021075.1; plasmid unnamed1:NZ_CP021076.1/CP021076.1; plasmid unnamed2:NZ_CP021077.1/CP021077.1		4	5860	2021-04-08T00:00:00Z	ftp://ftp.ncbi.nlm.nih.gov/genomes/all/GCA/017/858/835/GCA_017858835.1_ASM1785883v1	ftp://ftp.ncbi.nlm.nih.gov/genomes/all/GCF/017/858/835/GCF_017858835.1_ASM1785883v1
Burkholderia glumae	Bacteria;Proteobacteria;Betaproteobacteria	ATCC 33617	4	Japan	SAMN03012983	PRJNA259679	GCA_000960995.1	Complete	6.82073	68.1733	chromosome I:NZ_CP009435.1/CP009435.1; chromosome II:NZ_CP009434.1/CP009434.1; plasmid pBIN_1:NZ_CP009433.1/CP009433.1; plasmid pBIN_2:NZ_CP009432.1/CP009432.1		4	5775	2015-03-24T00:00:00Z	ftp://ftp.ncbi.nlm.nih.gov/genomes/all/GCA/000/960/995/GCA_000960995.1_ASM96099v1	ftp://ftp.ncbi.nlm.nih.gov/genomes/all/GCF/000/960/995/GCF_000960995.1_ASM96099v1
Burkholderia glumae	Bacteria;Proteobacteria;Betaproteobacteria	BGR1	4	Korea	SAMN02603166	PRJNA33901	GCA_000022645.2	Complete	7.28464	67.9346	chromosome 1:NC_012724.2/CP001503.2; chromosome 2:NC_012721.2/CP001504.2; plasmid bglu_1p:NC_012723.1/CP001505.1; plasmid bglu_2p:NC_012718.1/CP001506.1; plasmid bglu_3p:NC_012720.2/CP001507.2; plasmid bglu_4p:NC_012725.2/CP001508.2		6	6235	2009-05-22T00:00:00Z	ftp://ftp.ncbi.nlm.nih.gov/genomes/all/GCA/000/022/645/GCA_000022645.2_ASM2264v1	ftp://ftp.ncbi.nlm.nih.gov/genomes/all/GCF/000/022/645/GCF_000022645.2_ASM2264v1
Burkholderia glumae	Bacteria;Proteobacteria;Betaproteobacteria	FDAARGOS_346	4	Not applicable	SAMN06173359	PRJNA231221	GCA_002206305.2	Contig	6.8743	68.1		NJFN02	4	5782	2017-06-23T00:00:00Z	ftp://ftp.ncbi.nlm.nih.gov/genomes/all/GCA/002/206/305/GCA_002206305.2_ASM220630v2	ftp://ftp.ncbi.nlm.nih.gov/genomes/all/GCF/002/206/305/GCF_002206305.2_ASM220630v2
Burkholderia glumae	Bacteria;Proteobacteria;Betaproteobacteria	FDAARGOS_921	4	Not applicable	SAMN13450451	PRJNA231221	GCA_016598875.1	Complete	6.84566	68.1516	chromosome 1:NZ_CP066791.1/CP066791.1; chromosome 2:NZ_CP066792.1/CP066792.1; plasmid unnamed1:NZ_CP066789.1/CP066789.1; plasmid unnamed2:NZ_CP066790.1/CP066790.1; plasmid unnamed3:NZ_CP066793.1/CP066793.1		5	5811	2021-01-10T00:00:00Z	ftp://ftp.ncbi.nlm.nih.gov/genomes/all/GCA/016/598/875/GCA_016598875.1_ASM1659887v1	ftp://ftp.ncbi.nlm.nih.gov/genomes/all/GCF/016/598/875/GCF_016598875.1_ASM1659887v1
Burkholderia glumae	Bacteria;Proteobacteria;Betaproteobacteria	FDAARGOS_949	4	Not applicable	SAMN13450479	PRJNA231221	GCA_016026055.1	Complete	6.82088	68.1733	chromosome 1:NZ_CP065600.1/CP065600.1; chromosome 2:NZ_CP065601.1/CP065601.1; plasmid unnamed1:NZ_CP065602.1/CP065602.1; plasmid unnamed2:NZ_CP065603.1/CP065603.1		4	5772	2020-12-14T00:00:00Z	ftp://ftp.ncbi.nlm.nih.gov/genomes/all/GCA/016/026/055/GCA_016026055.1_ASM1602605v1	ftp://ftp.ncbi.nlm.nih.gov/genomes/all/GCF/016/026/055/GCF_016026055.1_ASM1602605v1
Burkholderia glumae	Bacteria;Proteobacteria;Betaproteobacteria	NCPPB 3923	4	Viet Nam	SAMN03178256	PRJNA267193	GCA_000801065.1	Contig	6.66399	68.3		JTDQ01	1121	5954	2014-12-11T00:00:00Z	ftp://ftp.ncbi.nlm.nih.gov/genomes/all/GCA/000/801/065/GCA_000801065.1_BG_NCPPB3923_E1.0	ftp://ftp.ncbi.nlm.nih.gov/genomes/all/GCF/000/801/065/GCF_000801065.1_BG_NCPPB3923_E1.0

## Sheet: virluence_information
Virluence information of 26 strains
Strain	Gene	VFID	VF_Name	VFcategory	PHI Protein ID	PHI Mutant Phenotype	Toxoflavin
257sh-1	EXE55_RS00210						tofR
257sh-1	EXE55_RS00220				Q8Y282	loss of pathogenicity
257sh-1	EXE55_RS29640				C5AHX3	effector (plant avirulence determinant)
257sh-1	EXE55_RS00780				Q2YJE8	reduced virulence
257sh-1	EXE55_RS01440				C5AGX2	reduced virulence
257sh-1	EXE55_RS02340	VF0433	Quorum-sensing	Biofilm
257sh-1	EXE55_RS02600				C5AG42	reduced virulence
257sh-1	EXE55_RS02935				A8YPP2	unaffected pathogenicity
257sh-1	EXE55_RS03235				C5AFJ6	reduced virulence
257sh-1	EXE55_RS03275				Q4UUL4	reduced virulence
257sh-1	EXE55_RS03805				Q8PBY5	reduced virulence
257sh-1	EXE55_RS03810				Q8PBY6	reduced virulence
257sh-1	EXE55_RS03940				Q63T64	reduced virulence
257sh-1	EXE55_RS04660				Q9I2U9	reduced virulence
257sh-1	EXE55_RS04920				A0A0L9JQ40	reduced virulence
257sh-1	EXE55_RS04935				B4EDS9	reduced virulence
257sh-1	EXE55_RS05125				A0A088U1Z5	unaffected pathogenicity
257sh-1	EXE55_RS06225				B4E6H5	reduced virulence
257sh-1	EXE55_RS06645				Q8XWV5	loss of pathogenicity
257sh-1	EXE55_RS07265				A0A0K0GLJ4	unaffected pathogenicity
257sh-1	EXE55_RS07370				B4E9E8	increased virulence (hypervirulence)
257sh-1	EXE55_RS07655						toxI
257sh-1	EXE55_RS07810				C5ACT8	reduced virulence
257sh-1	EXE55_RS07815	VF0431	Type IV pili	Adherence
257sh-1	EXE55_RS08230				C5AD21	reduced virulence
257sh-1	EXE55_RS08295				Q8Y282	loss of pathogenicity
257sh-1	EXE55_RS09205				B4E974	increased virulence (hypervirulence)
257sh-1	EXE55_RS09510	VF0430	Flagella	Motility
257sh-1	EXE55_RS09515	VF0430	Flagella	Motility
257sh-1	EXE55_RS09520	VF0430	Flagella	Motility
257sh-1	EXE55_RS09525	VF0430	Flagella	Motility
257sh-1	EXE55_RS09540	VF0430	Flagella	Motility
257sh-1	EXE55_RS09545	VF0430	Flagella	Motility
257sh-1	EXE55_RS09550	VF0430	Flagella	Motility
257sh-1	EXE55_RS09675				B4E8H7	reduced virulence
257sh-1	EXE55_RS09710	VF0430	Flagella	Motility
257sh-1	EXE55_RS09715	VF0430	Flagella	Motility
257sh-1	EXE55_RS09720	VF0430	Flagella	Motility
257sh-1	EXE55_RS09725	VF0430	Flagella	Motility
257sh-1	EXE55_RS09730	VF0430	Flagella	Motility
257sh-1	EXE55_RS09735	VF0430	Flagella	Motility
257sh-1	EXE55_RS09740	VF0430	Flagella	Motility
257sh-1	EXE55_RS09745	VF0430	Flagella	Motility
257sh-1	EXE55_RS10255	VF0430	Flagella	Motility
257sh-1	EXE55_RS10260	VF0430	Flagella	Motility
257sh-1	EXE55_RS10265	VF0430	Flagella	Motility
257sh-1	EXE55_RS10270	VF0430	Flagella	Motility
257sh-1	EXE55_RS10275	VF0430	Flagella	Motility
257sh-1	EXE55_RS10280	VF0430	Flagella	Motility
257sh-1	EXE55_RS10415				C5A845	reduced virulence
257sh-1	EXE55_RS10420				C5A846	reduced virulence
257sh-1	EXE55_RS10760				A0A0J9WXH4	increased virulence (hypervirulence)
257sh-1	EXE55_RS10780	VF0430	Flagella	Motility
257sh-1	EXE55_RS10815				C5A8V0	reduced virulence	flhD
257sh-1	EXE55_RS10820						flhC
257sh-1	EXE55_RS10825	VF0430	Flagella	Motility
257sh-1	EXE55_RS10830	VF0430	Flagella	Motility
257sh-1	EXE55_RS10840	VF0430	Flagella	Motility
257sh-1	EXE55_RS10845	VF0430	Flagella	Motility	P0A964	unaffected pathogenicity
257sh-1	EXE55_RS10850	VF0430	Flagella	Motility
257sh-1	EXE55_RS10855	VF0430	Flagella	Motility
257sh-1	EXE55_RS10860	VF0430	Flagella	Motility
257sh-1	EXE55_RS10865	VF0430	Flagella	Motility	P04042	reduced virulence
257sh-1	EXE55_RS10870	VF0430	Flagella	Motility	P0A2D5	reduced virulence
257sh-1	EXE55_RS10875	VF0430	Flagella	Motility
257sh-1	EXE55_RS10895	VF0430	Flagella	Motility
257sh-1	EXE55_RS10900	VF0430	Flagella	Motility
257sh-1	EXE55_RS10910	VF0430	Flagella	Motility
257sh-1	EXE55_RS10915	VF0430	Flagella	Motility
257sh-1	EXE55_RS11020				C5A8Z0	reduced virulence
257sh-1	EXE55_RS11120				B4E598	reduced virulence
257sh-1	EXE55_RS11125				B4E599	reduced virulence
257sh-1	EXE55_RS11130				B4E5A0	reduced virulence
257sh-1	EXE55_RS11135				B4E5A1	reduced virulence
257sh-1	EXE55_RS11140				B4E5A2	reduced virulence
257sh-1	EXE55_RS11190	VF0460	EF-Tu	Adherence	W8TRT9	increased virulence (hypervirulence)
257sh-1	EXE55_RS11265	VF0460	EF-Tu	Adherence	W8TRT9	increased virulence (hypervirulence)
257sh-1	EXE55_RS11325				Q7VTC1	unaffected pathogenicity
257sh-1	EXE55_RS11495				C5A9K2	effector (plant avirulence determinant)
257sh-1	EXE55_RS11505				C5A9K4	reduced virulence
257sh-1	EXE55_RS11925				C5AA67	effector (plant avirulence determinant)
257sh-1	EXE55_RS11945				A0A5H2Q4P9	reduced virulence
257sh-1	EXE55_RS11965				B4E6S3	unaffected pathogenicity
257sh-1	EXE55_RS12180				Q63QH7	reduced virulence
257sh-1	EXE55_RS12185				A0A1V2Y2U7	increased virulence (hypervirulence)
257sh-1	EXE55_RS12190				A0A088UAI6	reduced virulence
257sh-1	EXE55_RS12195				A0A088U4K2	reduced virulence
257sh-1	EXE55_RS12375	VF0431	Type IV pili	Adherence
257sh-1	EXE55_RS12385	VF0431	Type IV pili	Adherence
257sh-1	EXE55_RS13075				Q8XW15	loss of pathogenicity
257sh-1	EXE55_RS13205	VF0436	Capsule I	Immune modulation
257sh-1	EXE55_RS13220	VF0436	Capsule I	Immune modulation
257sh-1	EXE55_RS13275	VF0436	Capsule I	Immune modulation
257sh-1	EXE55_RS13285	VF0436	Capsule I	Immune modulation
257sh-1	EXE55_RS13290	VF0436	Capsule I	Immune modulation	Q63R85	reduced virulence
257sh-1	EXE55_RS13295	VF0436	Capsule I	Immune modulation	Q9AI28	reduced virulence
257sh-1	EXE55_RS13400				Q63RC4	unaffected pathogenicity
257sh-1	EXE55_RS13415				B4ECX9	increased virulence (hypervirulence)
257sh-1	EXE55_RS13530	VF0159	Hsp60	Adherence
257sh-1	EXE55_RS13590				Q9HU22	reduced virulence
257sh-1	EXE55_RS13700				A0A2J9HCW0	reduced virulence
257sh-1	EXE55_RS13905						toxE
257sh-1	EXE55_RS14415				Q75WC5	chemistry target: sensitivity to chemical
257sh-1	EXE55_RS14440				C5ACN1	reduced virulence
257sh-1	EXE55_RS14655				Q8ZPL7	reduced virulence
257sh-1	EXE55_RS14820				Q8Y0J2	lethal
257sh-1	EXE55_RS15130	VF0432	CdpA	Regulation	B4ED05	increased virulence (hypervirulence)
257sh-1	EXE55_RS15160				A4KCQ2	reduced virulence	qsmR
257sh-1	EXE55_RS15830				A0A069B091	reduced virulence
257sh-1	EXE55_RS16490	VF0430	Flagella	Motility
257sh-1	EXE55_RS16730				B2SNH3	reduced virulence
257sh-1	EXE55_RS16740				B2SNH4	reduced virulence
257sh-1	EXE55_RS17065	VF0560	Capsule	Immune modulation
257sh-1	EXE55_RS17095						toxJ
257sh-1	EXE55_RS17185				C5AMW5	effector (plant avirulence determinant)
257sh-1	EXE55_RS17435				A8YPP3	unaffected pathogenicity
257sh-1	EXE55_RS17640				Q2T7Q1	reduced virulence
257sh-1	EXE55_RS17645				Q2T7Q2	increased virulence (hypervirulence)
257sh-1	EXE55_RS17785				Q0GYW2	reduced virulence
257sh-1	EXE55_RS17795				Q0GYW4	reduced virulence
257sh-1	EXE55_RS18000						toxF
257sh-1	EXE55_RS18285				P19318	reduced virulence
257sh-1	EXE55_RS19275	VF0159	Hsp60	Adherence
257sh-1	EXE55_RS19445	VF0430	Flagella	Motility
257sh-1	EXE55_RS19540	VF0430	Flagella	Motility
257sh-1	EXE55_RS19755				B4EJI4	unaffected pathogenicity
257sh-1	EXE55_RS20310				A0A2J9HLA0	reduced virulence
257sh-1	EXE55_RS20330				A0A2J9HL87	reduced virulence
257sh-1	EXE55_RS20685				Q8ZR28	reduced virulence
257sh-1	EXE55_RS21565						toxG
257sh-1	EXE55_RS21570						toxH
257sh-1	EXE55_RS21575						toxI
257sh-1	EXE55_RS21645	VF0974	SCI (Salmonella centrisome island)	Effector delivery system	H9L4I8	reduced virulence
257sh-1	EXE55_RS21650	VF0974	SCI (Salmonella centrisome island)	Effector delivery system	D4I0Q9	unaffected pathogenicity
257sh-1	EXE55_RS21655				C5ALD1	effector (plant avirulence determinant)
257sh-1	EXE55_RS21970	VF0569	T6SS	Effector delivery system	D4I234	reduced virulence
257sh-1	EXE55_RS22700	VF0504	AdeFGH efflux pump	Biofilm
257sh-1	EXE55_RS29900				Q63KC3	reduced virulence
257sh-1	EXE55_RS23770				A0A076ZMY5	unaffected pathogenicity
257sh-1	EXE55_RS24115						toxJ
257sh-1	EXE55_RS24125						toxI
257sh-1	EXE55_RS24130						toxH
257sh-1	EXE55_RS24135						toxG
257sh-1	EXE55_RS24140						toxF
257sh-1	EXE55_RS24150				Q9LBJ0	reduced virulence
257sh-1	EXE55_RS24155						toxB
257sh-1	EXE55_RS24160						toxC
257sh-1	EXE55_RS24165						toxD
257sh-1	EXE55_RS24170						toxE
257sh-1	EXE55_RS24520				A0A0S4VR07	reduced virulence
257sh-1	EXE55_RS25000						toxB
257sh-1	EXE55_RS25050	VF0433	Quorum-sensing	Biofilm	Q4VSJ8	unaffected pathogenicity	tofI
257sh-1	EXE55_RS25055				C5AIS7	reduced virulence
257sh-1	EXE55_RS25060	VF0433	Quorum-sensing	Biofilm	Q4VSJ9	unaffected pathogenicity	tofR
257sh-1	EXE55_RS25765	VF0430	Flagella	Motility
257sh-1	EXE55_RS25980				B4EJI4	unaffected pathogenicity
257sh-1	EXE55_RS26380				B4EIW7	increased virulence (hypervirulence)
257sh-1	EXE55_RS26585	VF0569	T6SS	Effector delivery system	C5AHX3	effector (plant avirulence determinant)
257sh-1	EXE55_RS26610	VF0569	T6SS	Effector delivery system	D4I234	reduced virulence
257sh-1	EXE55_RS27045						toxI
257sh-1	EXE55_RS27445				Q8XDQ1	effector (plant avirulence determinant)
ATCC_33617	KS03_RS13200				B4E6H5	reduced virulence
ATCC_33617	KS03_RS13765				Q8XWV5	loss of pathogenicity
ATCC_33617	KS03_RS14195				A0A0K0GLJ4	unaffected pathogenicity
ATCC_33617	KS03_RS14290				B4E9E8	increased virulence (hypervirulence)
ATCC_33617	KS03_RS14575						toxI
ATCC_33617	KS03_RS14730				C5ACT8	reduced virulence
ATCC_33617	KS03_RS14735	VF0431	Type IV pili	Adherence
ATCC_33617	KS03_RS15150				C5AD21	reduced virulence
ATCC_33617	KS03_RS15215				Q8Y282	loss of pathogenicity
ATCC_33617	KS03_RS16060				B4E974	increased virulence (hypervirulence)
ATCC_33617	KS03_RS16355	VF0430	Flagella	Motility
ATCC_33617	KS03_RS16360	VF0430	Flagella	Motility
ATCC_33617	KS03_RS16365	VF0430	Flagella	Motility
ATCC_33617	KS03_RS16370	VF0430	Flagella	Motility
ATCC_33617	KS03_RS16385	VF0430	Flagella	Motility
ATCC_33617	KS03_RS16390	VF0430	Flagella	Motility
ATCC_33617	KS03_RS16395	VF0430	Flagella	Motility
ATCC_33617	KS03_RS16520				B4E8H7	reduced virulence
ATCC_33617	KS03_RS16555	VF0430	Flagella	Motility
ATCC_33617	KS03_RS16560	VF0430	Flagella	Motility
ATCC_33617	KS03_RS16565	VF0430	Flagella	Motility
ATCC_33617	KS03_RS16570	VF0430	Flagella	Motility
ATCC_33617	KS03_RS16575	VF0430	Flagella	Motility
ATCC_33617	KS03_RS16580	VF0430	Flagella	Motility
ATCC_33617	KS03_RS16585	VF0430	Flagella	Motility
ATCC_33617	KS03_RS16590	VF0430	Flagella	Motility
ATCC_33617	KS03_RS17155	VF0430	Flagella	Motility
ATCC_33617	KS03_RS17160	VF0430	Flagella	Motility
ATCC_33617	KS03_RS17165	VF0430	Flagella	Motility
ATCC_33617	KS03_RS17170	VF0430	Flagella	Motility
ATCC_33617	KS03_RS17175	VF0430	Flagella	Motility
ATCC_33617	KS03_RS17180	VF0430	Flagella	Motility
ATCC_33617	KS03_RS17315				C5A845	reduced virulence
ATCC_33617	KS03_RS17320				C5A846	reduced virulence
ATCC_33617	KS03_RS17920				A0A0J9WXH4	increased virulence (hypervirulence)
ATCC_33617	KS03_RS17940	VF0430	Flagella	Motility
ATCC_33617	KS03_RS17975				C5A8V0	reduced virulence	flhD
ATCC_33617	KS03_RS17980						flhC
ATCC_33617	KS03_RS17985	VF0430	Flagella	Motility
ATCC_33617	KS03_RS17990	VF0430	Flagella	Motility
ATCC_33617	KS03_RS18000	VF0430	Flagella	Motility
ATCC_33617	KS03_RS18005	VF0430	Flagella	Motility	P0A964	unaffected pathogenicity
ATCC_33617	KS03_RS18010	VF0430	Flagella	Motility
ATCC_33617	KS03_RS18015	VF0430	Flagella	Motility
ATCC_33617	KS03_RS18020	VF0430	Flagella	Motility
ATCC_33617	KS03_RS18025	VF0430	Flagella	Motility	P04042	reduced virulence
ATCC_33617	KS03_RS18030	VF0430	Flagella	Motility	P0A2D5	reduced virulence
ATCC_33617	KS03_RS18035	VF0430	Flagella	Motility
ATCC_33617	KS03_RS18055	VF0430	Flagella	Motility
ATCC_33617	KS03_RS18060	VF0430	Flagella	Motility
ATCC_33617	KS03_RS18070	VF0430	Flagella	Motility
ATCC_33617	KS03_RS18075	VF0430	Flagella	Motility
ATCC_33617	KS03_RS18265				C5A8Z0	reduced virulence
ATCC_33617	KS03_RS18365				B4E598	reduced virulence
ATCC_33617	KS03_RS18370				B4E599	reduced virulence
ATCC_33617	KS03_RS18375				B4E5A0	reduced virulence
ATCC_33617	KS03_RS18380				B4E5A1	reduced virulence
ATCC_33617	KS03_RS18385				B4E5A2	reduced virulence
ATCC_33617	KS03_RS18435	VF0460	EF-Tu	Adherence	W8TRT9	increased virulence (hypervirulence)
ATCC_33617	KS03_RS18510	VF0460	EF-Tu	Adherence	W8TRT9	increased virulence (hypervirulence)
ATCC_33617	KS03_RS18570				Q7VTC1	unaffected pathogenicity
ATCC_33617	KS03_RS18735				C5A9K2	effector (plant avirulence determinant)
ATCC_33617	KS03_RS18745				C5A9K4	reduced virulence
ATCC_33617	KS03_RS19085				C5AA67	effector (plant avirulence determinant)
ATCC_33617	KS03_RS19105				A0A5H2Q4P9	reduced virulence
ATCC_33617	KS03_RS19125				B4E6S3	unaffected pathogenicity
ATCC_33617	KS03_RS19345				Q63QH7	reduced virulence
ATCC_33617	KS03_RS19350				A0A1V2Y2U7	increased virulence (hypervirulence)
ATCC_33617	KS03_RS19355				A0A088UAI6	reduced virulence
ATCC_33617	KS03_RS19360				A0A088U4K2	reduced virulence
ATCC_33617	KS03_RS19535	VF0431	Type IV pili	Adherence
ATCC_33617	KS03_RS19545	VF0431	Type IV pili	Adherence
ATCC_33617	KS03_RS20235				Q8XW15	loss of pathogenicity
ATCC_33617	KS03_RS20370	VF0436	Capsule I	Immune modulation
ATCC_33617	KS03_RS20385	VF0436	Capsule I	Immune modulation
ATCC_33617	KS03_RS20440	VF0436	Capsule I	Immune modulation
ATCC_33617	KS03_RS20450	VF0436	Capsule I	Immune modulation
ATCC_33617	KS03_RS20455	VF0436	Capsule I	Immune modulation	Q63R85	reduced virulence
ATCC_33617	KS03_RS20460	VF0436	Capsule I	Immune modulation	Q9AI28	reduced virulence
ATCC_33617	KS03_RS20565				Q63RC4	unaffected pathogenicity
ATCC_33617	KS03_RS20580				B4ECX9	increased virulence (hypervirulence)
ATCC_33617	KS03_RS20695	VF0159	Hsp60	Adherence
ATCC_33617	KS03_RS20755				Q9HU22	reduced virulence
ATCC_33617	KS03_RS20865				A0A2J9HCW0	reduced virulence
ATCC_33617	KS03_RS21095						toxE
ATCC_33617	KS03_RS21485				Q75WC5	chemistry target: sensitivity to chemical
ATCC_33617	KS03_RS21510				C5ACN1	reduced virulence
ATCC_33617	KS03_RS21725				Q8ZPL7	reduced virulence
ATCC_33617	KS03_RS21880				Q8Y0J2	lethal
ATCC_33617	KS03_RS22200	VF0432	CdpA	Regulation	B4ED05	increased virulence (hypervirulence)
ATCC_33617	KS03_RS22885				A0A069B091	reduced virulence
ATCC_33617	KS03_RS23845				Q63T64	reduced virulence
ATCC_33617	KS03_RS23970				Q8PBY6	reduced virulence
ATCC_33617	KS03_RS23975				Q8PBY5	reduced virulence
ATCC_33617	KS03_RS24465				Q4UUL4	reduced virulence
ATCC_33617	KS03_RS24505				C5AFJ6	reduced virulence
ATCC_33617	KS03_RS24800				A8YPP2	unaffected pathogenicity
ATCC_33617	KS03_RS25150				C5AG42	reduced virulence
ATCC_33617	KS03_RS25395	VF0433	Quorum-sensing	Biofilm
ATCC_33617	KS03_RS26440				C5AGX2	reduced virulence
ATCC_33617	KS03_RS27505				Q2YJE8	reduced virulence
ATCC_33617	KS03_RS28010				Q8Y282	loss of pathogenicity
ATCC_33617	KS03_RS28025						tofR
ATCC_33617	KS03_RS28145				Q9I2U9	reduced virulence
ATCC_33617	KS03_RS28395				A0A0L9JQ40	reduced virulence
ATCC_33617	KS03_RS28410				B4EDS9	reduced virulence
ATCC_33617	KS03_RS28545				A0A088U1Z5	unaffected pathogenicity
ATCC_33617	KS03_RS02000	VF0569	T6SS	Effector delivery system	D4I234	reduced virulence
ATCC_33617	KS03_RS02285				C5ALD1	effector (plant avirulence determinant)
ATCC_33617	KS03_RS02290	VF0974	SCI (Salmonella centrisome island)	Effector delivery system	D4I0Q9	unaffected pathogenicity
ATCC_33617	KS03_RS02295	VF0974	SCI (Salmonella centrisome island)	Effector delivery system	H9L4I8	reduced virulence
ATCC_33617	KS03_RS02360						toxI
ATCC_33617	KS03_RS02365						toxH
ATCC_33617	KS03_RS02370						toxG
ATCC_33617	KS03_RS03245				Q8ZR28	reduced virulence
ATCC_33617	KS03_RS03710				A0A2J9HL87	reduced virulence
ATCC_33617	KS03_RS03730				A0A2J9HLA0	reduced virulence
ATCC_33617	KS03_RS04215				B4EJI4	unaffected pathogenicity
ATCC_33617	KS03_RS04420	VF0430	Flagella	Motility
ATCC_33617	KS03_RS04515	VF0430	Flagella	Motility
ATCC_33617	KS03_RS04670	VF0159	Hsp60	Adherence
ATCC_33617	KS03_RS05650				P19318	reduced virulence
ATCC_33617	KS03_RS05935						toxF
ATCC_33617	KS03_RS06140				Q0GYW4	reduced virulence
ATCC_33617	KS03_RS06150				Q0GYW2	reduced virulence
ATCC_33617	KS03_RS06290				Q2T7Q2	increased virulence (hypervirulence)
ATCC_33617	KS03_RS06295				Q2T7Q1	reduced virulence
ATCC_33617	KS03_RS06585				A0A0S4VR07	reduced virulence
ATCC_33617	KS03_RS07055						toxB
ATCC_33617	KS03_RS07095	VF0433	Quorum-sensing	Biofilm	Q4VSJ8	unaffected pathogenicity	tofI
ATCC_33617	KS03_RS07100				C5AIS7	reduced virulence
ATCC_33617	KS03_RS07785	VF0430	Flagella	Motility
ATCC_33617	KS03_RS07980				B4EJI4	unaffected pathogenicity
ATCC_33617	KS03_RS08350				B4EIW7	increased virulence (hypervirulence)
ATCC_33617	KS03_RS08640	VF0569	T6SS	Effector delivery system	C5AHX3	effector (plant avirulence determinant)
ATCC_33617	KS03_RS08665	VF0569	T6SS	Effector delivery system	D4I234	reduced virulence
ATCC_33617	KS03_RS09060						toxI
ATCC_33617	KS03_RS09705	VF0430	Flagella	Motility
ATCC_33617	KS03_RS09980				B2SNH3	reduced virulence
ATCC_33617	KS03_RS09990				B2SNH4	reduced virulence
ATCC_33617	KS03_RS10285	VF0560	Capsule	Immune modulation
ATCC_33617	KS03_RS10315						toxJ
ATCC_33617	KS03_RS10395				C5AMW5	effector (plant avirulence determinant)
ATCC_33617	KS03_RS10635				A8YPP3	unaffected pathogenicity
ATCC_33617	KS03_RS10905						toxE
ATCC_33617	KS03_RS10910						toxD
ATCC_33617	KS03_RS10915						toxC
ATCC_33617	KS03_RS10920						toxB
ATCC_33617	KS03_RS10925				Q9LBJ0	reduced virulence
ATCC_33617	KS03_RS10935						toxF
ATCC_33617	KS03_RS10940						toxG
ATCC_33617	KS03_RS10945						toxH
ATCC_33617	KS03_RS10950						toxI
ATCC_33617	KS03_RS10960						toxJ
ATCC_33617	KS03_RS11295				A0A076ZMY5	unaffected pathogenicity
ATCC_33617	KS03_RS32800				Q63KC3	reduced virulence
ATCC_33617	KS03_RS12340	VF0504	AdeFGH efflux pump	Biofilm
ATCC_33617	KS03_RS29240				Q8XDQ1	effector (plant avirulence determinant)
957856-41-c	B7759_RS00415				C5AA67	effector (plant avirulence determinant)
957856-41-c	B7759_RS00435				A0A5H2Q4P9	reduced virulence
957856-41-c	B7759_RS00455				B4E6S3	unaffected pathogenicity
957856-41-c	B7759_RS00670				Q63QH7	reduced virulence
957856-41-c	B7759_RS00675				A0A1V2Y2U7	increased virulence (hypervirulence)
957856-41-c	B7759_RS00680				A0A088UAI6	reduced virulence
957856-41-c	B7759_RS00685				A0A088U4K2	reduced virulence
957856-41-c	B7759_RS00860	VF0431	Type IV pili	Adherence
957856-41-c	B7759_RS00870	VF0431	Type IV pili	Adherence
957856-41-c	B7759_RS01565				Q8XW15	loss of pathogenicity
957856-41-c	B7759_RS01700	VF0436	Capsule I	Immune modulation
957856-41-c	B7759_RS01715	VF0436	Capsule I	Immune modulation
957856-41-c	B7759_RS01770	VF0436	Capsule I	Immune modulation
957856-41-c	B7759_RS01780	VF0436	Capsule I	Immune modulation
957856-41-c	B7759_RS01785	VF0436	Capsule I	Immune modulation	Q63R85	reduced virulence
957856-41-c	B7759_RS01790	VF0436	Capsule I	Immune modulation	Q9AI28	reduced virulence
957856-41-c	B7759_RS01895				Q63RC4	unaffected pathogenicity
957856-41-c	B7759_RS01910				B4ECX9	increased virulence (hypervirulence)
957856-41-c	B7759_RS02025	VF0159	Hsp60	Adherence
957856-41-c	B7759_RS02085				Q9HU22	reduced virulence
957856-41-c	B7759_RS02195				A0A2J9HCW0	reduced virulence
957856-41-c	B7759_RS02445						toxE
957856-41-c	B7759_RS02920				Q75WC5	chemistry target: sensitivity to chemical
957856-41-c	B7759_RS02945				C5ACN1	reduced virulence
957856-41-c	B7759_RS03170				Q8ZPL7	reduced virulence
957856-41-c	B7759_RS03335				Q8Y0J2	lethal
957856-41-c	B7759_RS03655	VF0432	CdpA	Regulation	B4ED05	increased virulence (hypervirulence)
957856-41-c	B7759_RS03685				A4KCQ2	reduced virulence	qsmR
957856-41-c	B7759_RS04335				A0A069B091	reduced virulence
957856-41-c	B7759_RS04580	VF0428	Bsa T3SS	Effector delivery system	A0A0H2WA86	effector (plant avirulence determinant)
957856-41-c	B7759_RS04645						tofR
957856-41-c	B7759_RS04655				Q8Y282	loss of pathogenicity
957856-41-c	B7759_RS05220				Q2YJE8	reduced virulence
957856-41-c	B7759_RS06370				C5AGX2	reduced virulence
957856-41-c	B7759_RS07760	VF0433	Quorum-sensing	Biofilm
957856-41-c	B7759_RS08020				C5AG42	reduced virulence
957856-41-c	B7759_RS08430				A8YPP2	unaffected pathogenicity
957856-41-c	B7759_RS08725				C5AFJ6	reduced virulence
957856-41-c	B7759_RS08765				Q4UUL4	reduced virulence
957856-41-c	B7759_RS09265				Q8PBY5	reduced virulence
957856-41-c	B7759_RS09270				Q8PBY6	reduced virulence
957856-41-c	B7759_RS09400				Q63T64	reduced virulence
957856-41-c	B7759_RS10035				Q9I2U9	reduced virulence
957856-41-c	B7759_RS10295				A0A0L9JQ40	reduced virulence
957856-41-c	B7759_RS10310				B4EDS9	reduced virulence
957856-41-c	B7759_RS10695				A0A088U1Z5	unaffected pathogenicity
957856-41-c	B7759_RS12125				Q8XWV5	loss of pathogenicity
957856-41-c	B7759_RS12585				A0A0K0GLJ4	unaffected pathogenicity
957856-41-c	B7759_RS12690				B4E9E8	increased virulence (hypervirulence)
957856-41-c	B7759_RS12975						toxI
957856-41-c	B7759_RS13135				C5ACT8	reduced virulence
957856-41-c	B7759_RS13140	VF0431	Type IV pili	Adherence
957856-41-c	B7759_RS13690				C5AD21	reduced virulence
957856-41-c	B7759_RS13755				Q8Y282	loss of pathogenicity
957856-41-c	B7759_RS14615				B4E974	increased virulence (hypervirulence)
957856-41-c	B7759_RS14920	VF0430	Flagella	Motility
957856-41-c	B7759_RS14925	VF0430	Flagella	Motility
957856-41-c	B7759_RS14930	VF0430	Flagella	Motility
957856-41-c	B7759_RS14935	VF0430	Flagella	Motility
957856-41-c	B7759_RS14950	VF0430	Flagella	Motility
957856-41-c	B7759_RS14955	VF0430	Flagella	Motility
957856-41-c	B7759_RS14960	VF0430	Flagella	Motility
957856-41-c	B7759_RS15085				B4E8H7	reduced virulence
957856-41-c	B7759_RS15120	VF0430	Flagella	Motility
957856-41-c	B7759_RS15125	VF0430	Flagella	Motility
957856-41-c	B7759_RS15130	VF0430	Flagella	Motility
957856-41-c	B7759_RS15135	VF0430	Flagella	Motility
957856-41-c	B7759_RS15140	VF0430	Flagella	Motility
957856-41-c	B7759_RS15145	VF0430	Flagella	Motility
957856-41-c	B7759_RS15150	VF0430	Flagella	Motility
957856-41-c	B7759_RS15155	VF0430	Flagella	Motility
957856-41-c	B7759_RS15600				Q8Y0E7	reduced virulence
957856-41-c	B7759_RS15910	VF0430	Flagella	Motility
957856-41-c	B7759_RS15915	VF0430	Flagella	Motility
957856-41-c	B7759_RS15920	VF0430	Flagella	Motility
957856-41-c	B7759_RS15925	VF0430	Flagella	Motility
957856-41-c	B7759_RS15930	VF0430	Flagella	Motility
957856-41-c	B7759_RS15935	VF0430	Flagella	Motility
957856-41-c	B7759_RS16075				C5A845	reduced virulence
957856-41-c	B7759_RS16080				C5A846	reduced virulence
957856-41-c	B7759_RS16420				A0A0J9WXH4	increased virulence (hypervirulence)
957856-41-c	B7759_RS16440	VF0430	Flagella	Motility
957856-41-c	B7759_RS16475				C5A8V0	reduced virulence	flhD
957856-41-c	B7759_RS16480						flhC
957856-41-c	B7759_RS16485	VF0430	Flagella	Motility
957856-41-c	B7759_RS16490	VF0430	Flagella	Motility
957856-41-c	B7759_RS16500	VF0430	Flagella	Motility
957856-41-c	B7759_RS16505	VF0430	Flagella	Motility	P0A964	unaffected pathogenicity
957856-41-c	B7759_RS16510	VF0430	Flagella	Motility
957856-41-c	B7759_RS16515	VF0430	Flagella	Motility
957856-41-c	B7759_RS16520	VF0430	Flagella	Motility
957856-41-c	B7759_RS16525	VF0430	Flagella	Motility	P04042	reduced virulence
957856-41-c	B7759_RS16530	VF0430	Flagella	Motility	P0A2D5	reduced virulence
957856-41-c	B7759_RS16535	VF0430	Flagella	Motility
957856-41-c	B7759_RS16555	VF0430	Flagella	Motility
957856-41-c	B7759_RS16560	VF0430	Flagella	Motility
957856-41-c	B7759_RS16570	VF0430	Flagella	Motility
957856-41-c	B7759_RS16575	VF0430	Flagella	Motility
957856-41-c	B7759_RS16680				C5A8Z0	reduced virulence
957856-41-c	B7759_RS16780				B4E598	reduced virulence
957856-41-c	B7759_RS16785				B4E599	reduced virulence
957856-41-c	B7759_RS16790				B4E5A0	reduced virulence
957856-41-c	B7759_RS16795				B4E5A1	reduced virulence
957856-41-c	B7759_RS16800				B4E5A2	reduced virulence
957856-41-c	B7759_RS16850	VF0460	EF-Tu	Adherence	W8TRT9	increased virulence (hypervirulence)
957856-41-c	B7759_RS16930	VF0460	EF-Tu	Adherence	W8TRT9	increased virulence (hypervirulence)
957856-41-c	B7759_RS16990				Q7VTC1	unaffected pathogenicity
957856-41-c	B7759_RS17160				C5A9K2	effector (plant avirulence determinant)
957856-41-c	B7759_RS17170				C5A9K4	reduced virulence
957856-41-c	B7759_RS17585				B4EJI4	unaffected pathogenicity
957856-41-c	B7759_RS18040				A0A2J9HLA0	reduced virulence
957856-41-c	B7759_RS18060				A0A2J9HL87	reduced virulence
957856-41-c	B7759_RS18580				Q8ZR28	reduced virulence
957856-41-c	B7759_RS19465						toxG
957856-41-c	B7759_RS19470						toxH
957856-41-c	B7759_RS19475						toxI
957856-41-c	B7759_RS19545	VF0974	SCI (Salmonella centrisome island)	Effector delivery system	H9L4I8	reduced virulence
957856-41-c	B7759_RS19550	VF0974	SCI (Salmonella centrisome island)	Effector delivery system	D4I0Q9	unaffected pathogenicity
957856-41-c	B7759_RS19555				C5ALD1	effector (plant avirulence determinant)
957856-41-c	B7759_RS19900	VF0569	T6SS	Effector delivery system	D4I234	reduced virulence
957856-41-c	B7759_RS20635	VF0504	AdeFGH efflux pump	Biofilm
957856-41-c	B7759_RS21215				Q63KC3	reduced virulence
957856-41-c	B7759_RS21725				A0A076ZMY5	unaffected pathogenicity
957856-41-c	B7759_RS22085						toxJ
957856-41-c	B7759_RS22095						toxI
957856-41-c	B7759_RS22100						toxH
957856-41-c	B7759_RS22105						toxG
957856-41-c	B7759_RS22110						toxF
957856-41-c	B7759_RS22120				Q9LBJ0	reduced virulence	toxA
957856-41-c	B7759_RS22125						toxB
957856-41-c	B7759_RS22130						toxC
957856-41-c	B7759_RS22135						toxD
957856-41-c	B7759_RS22140						toxE
957856-41-c	B7759_RS22450				A8YPP3	unaffected pathogenicity
957856-41-c	B7759_RS22700				C5AMW5	effector (plant avirulence determinant)
957856-41-c	B7759_RS22790						toxJ
957856-41-c	B7759_RS22820	VF0560	Capsule	Immune modulation
957856-41-c	B7759_RS23105				B2SNH4	reduced virulence
957856-41-c	B7759_RS23115				B2SNH3	reduced virulence
957856-41-c	B7759_RS23660	VF0430	Flagella	Motility
957856-41-c	B7759_RS24315						toxI
957856-41-c	B7759_RS24725	VF0569	T6SS	Effector delivery system	D4I234	reduced virulence
957856-41-c	B7759_RS24750	VF0569	T6SS	Effector delivery system	C5AHX3	effector (plant avirulence determinant)
957856-41-c	B7759_RS25040				B4EIW7	increased virulence (hypervirulence)
957856-41-c	B7759_RS25440				B4EJI4	unaffected pathogenicity
957856-41-c	B7759_RS25665	VF0430	Flagella	Motility
957856-41-c	B7759_RS26405	VF0433	Quorum-sensing	Biofilm	Q4VSJ9	unaffected pathogenicity	tofR
957856-41-c	B7759_RS26410				C5AIS7	reduced virulence
957856-41-c	B7759_RS26415	VF0433	Quorum-sensing	Biofilm	Q4VSJ8	unaffected pathogenicity	tofI
957856-41-c	B7759_RS26460						toxB
957856-41-c	B7759_RS26945				A0A0S4VR07	reduced virulence
957856-41-c	B7759_RS27235				Q2T7Q1	reduced virulence
957856-41-c	B7759_RS27240				Q2T7Q2	increased virulence (hypervirulence)
957856-41-c	B7759_RS27380				Q0GYW2	reduced virulence
957856-41-c	B7759_RS27390				Q0GYW4	reduced virulence
957856-41-c	B7759_RS27590						toxF
957856-41-c	B7759_RS27875				P19318	reduced virulence
957856-41-c	B7759_RS28885	VF0159	Hsp60	Adherence
957856-41-c	B7759_RS29055	VF0430	Flagella	Motility
957856-41-c	B7759_RS29150	VF0430	Flagella	Motility
957856-41-c	B7759_RS29155	VF0127	ACF	Others
957856-41-c	B7759_RS30745				Q8XDQ1	effector (plant avirulence determinant)
GX	GAS19_RS00080	VF0430	Flagella	Motility
GX	GAS19_RS00085	VF0430	Flagella	Motility
GX	GAS19_RS00090	VF0430	Flagella	Motility
GX	GAS19_RS00095	VF0430	Flagella	Motility
GX	GAS19_RS00100	VF0430	Flagella	Motility
GX	GAS19_RS00105	VF0430	Flagella	Motility
GX	GAS19_RS00245				C5A845	reduced virulence
GX	GAS19_RS00250				C5A846	reduced virulence
GX	GAS19_RS00595				A0A0J9WXH4	increased virulence (hypervirulence)
GX	GAS19_RS00615	VF0430	Flagella	Motility
GX	GAS19_RS00650				C5A8V0	reduced virulence	flhD
GX	GAS19_RS00655						flhC
GX	GAS19_RS00660	VF0430	Flagella	Motility
GX	GAS19_RS00665	VF0430	Flagella	Motility
GX	GAS19_RS00680	VF0430	Flagella	Motility	P0A964	unaffected pathogenicity
GX	GAS19_RS00690	VF0430	Flagella	Motility
GX	GAS19_RS00695	VF0430	Flagella	Motility
GX	GAS19_RS00700	VF0430	Flagella	Motility	P04042	reduced virulence
GX	GAS19_RS00705	VF0430	Flagella	Motility	P0A2D5	reduced virulence
GX	GAS19_RS00710	VF0430	Flagella	Motility
GX	GAS19_RS00730	VF0430	Flagella	Motility
GX	GAS19_RS00735	VF0430	Flagella	Motility
GX	GAS19_RS00745	VF0430	Flagella	Motility
GX	GAS19_RS00750	VF0430	Flagella	Motility
GX	GAS19_RS00855				C5A8Z0	reduced virulence
GX	GAS19_RS00960				B4E598	reduced virulence
GX	GAS19_RS00965				B4E599	reduced virulence
GX	GAS19_RS00970				B4E5A0	reduced virulence
GX	GAS19_RS00975				B4E5A1	reduced virulence
GX	GAS19_RS00980				B4E5A2	reduced virulence
GX	GAS19_RS01035	VF0460	EF-Tu	Adherence	W8TRT9	increased virulence (hypervirulence)
GX	GAS19_RS01115	VF0460	EF-Tu	Adherence	W8TRT9	increased virulence (hypervirulence)
GX	GAS19_RS01175				Q7VTC1	unaffected pathogenicity
GX	GAS19_RS01350				C5A9K2	effector (plant avirulence determinant)
GX	GAS19_RS01360				C5A9K4	reduced virulence
GX	GAS19_RS02300				Q8Y282	loss of pathogenicity
GX	GAS19_RS02365				C5AD21	reduced virulence
GX	GAS19_RS02865	VF0431	Type IV pili	Adherence
GX	GAS19_RS02870				C5ACT8	reduced virulence
GX	GAS19_RS03025						toxI
GX	GAS19_RS03310				B4E9E8	increased virulence (hypervirulence)
GX	GAS19_RS03415				A0A0K0GLJ4	unaffected pathogenicity
GX	GAS19_RS03805				Q8XWV5	loss of pathogenicity
GX	GAS19_RS05270				A0A088U1Z5	unaffected pathogenicity
GX	GAS19_RS05405				B4EDS9	reduced virulence
GX	GAS19_RS05420				A0A0L9JQ40	reduced virulence
GX	GAS19_RS05680				Q9I2U9	reduced virulence
GX	GAS19_RS06510				Q63T64	reduced virulence
GX	GAS19_RS06640				Q8PBY6	reduced virulence
GX	GAS19_RS06645				Q8PBY5	reduced virulence
GX	GAS19_RS07145				Q4UUL4	reduced virulence
GX	GAS19_RS07185				C5AFJ6	reduced virulence
GX	GAS19_RS07485				A8YPP2	unaffected pathogenicity
GX	GAS19_RS08270				C5AG42	reduced virulence
GX	GAS19_RS08530	VF0433	Quorum-sensing	Biofilm
GX	GAS19_RS09845				C5AGX2	reduced virulence
GX	GAS19_RS10640				Q2YJE8	reduced virulence
GX	GAS19_RS11235				Q8Y282	loss of pathogenicity
GX	GAS19_RS11245						tofR
GX	GAS19_RS11710				A0A069B091	reduced virulence
GX	GAS19_RS12355				A4KCQ2	reduced virulence	qsmR
GX	GAS19_RS12385	VF0432	CdpA	Regulation	B4ED05	increased virulence (hypervirulence)
GX	GAS19_RS12710				Q8Y0J2	lethal
GX	GAS19_RS12875				Q8ZPL7	reduced virulence
GX	GAS19_RS13095				C5ACN1	reduced virulence
GX	GAS19_RS13120				Q75WC5	chemistry target: sensitivity to chemical
GX	GAS19_RS13595						toxE
GX	GAS19_RS13840				A0A2J9HCW0	reduced virulence
GX	GAS19_RS13950				Q9HU22	reduced virulence
GX	GAS19_RS14010	VF0159	Hsp60	Adherence
GX	GAS19_RS14125				B4ECX9	increased virulence (hypervirulence)
GX	GAS19_RS14140				Q63RC4	unaffected pathogenicity
GX	GAS19_RS14250	VF0436	Capsule I	Immune modulation	Q9AI28	reduced virulence
GX	GAS19_RS14255	VF0436	Capsule I	Immune modulation	Q63R85	reduced virulence
GX	GAS19_RS14260	VF0436	Capsule I	Immune modulation
GX	GAS19_RS14270	VF0436	Capsule I	Immune modulation
GX	GAS19_RS14325	VF0436	Capsule I	Immune modulation
GX	GAS19_RS14340	VF0436	Capsule I	Immune modulation
GX	GAS19_RS14470				Q8XW15	loss of pathogenicity
GX	GAS19_RS15160	VF0431	Type IV pili	Adherence
GX	GAS19_RS15170	VF0431	Type IV pili	Adherence
GX	GAS19_RS15350				A0A088U4K2	reduced virulence
GX	GAS19_RS15355				A0A088UAI6	reduced virulence
GX	GAS19_RS15360				A0A1V2Y2U7	increased virulence (hypervirulence)
GX	GAS19_RS15365				Q63QH7	reduced virulence
GX	GAS19_RS15585				B4E6S3	unaffected pathogenicity
GX	GAS19_RS15605				A0A5H2Q4P9	reduced virulence
GX	GAS19_RS15625				C5AA67	effector (plant avirulence determinant)
GX	GAS19_RS16105				B4E974	increased virulence (hypervirulence)
GX	GAS19_RS16415	VF0430	Flagella	Motility
GX	GAS19_RS16420	VF0430	Flagella	Motility
GX	GAS19_RS16425	VF0430	Flagella	Motility
GX	GAS19_RS16430	VF0430	Flagella	Motility
GX	GAS19_RS16445	VF0430	Flagella	Motility
GX	GAS19_RS16450	VF0430	Flagella	Motility
GX	GAS19_RS16455	VF0430	Flagella	Motility
GX	GAS19_RS16580				B4E8H7	reduced virulence
GX	GAS19_RS16615	VF0430	Flagella	Motility
GX	GAS19_RS16620	VF0430	Flagella	Motility
GX	GAS19_RS16625	VF0430	Flagella	Motility
GX	GAS19_RS16630	VF0430	Flagella	Motility
GX	GAS19_RS16635	VF0430	Flagella	Motility
GX	GAS19_RS16640	VF0430	Flagella	Motility
GX	GAS19_RS16645	VF0430	Flagella	Motility
GX	GAS19_RS17520	VF0159	Hsp60	Adherence
GX	GAS19_RS17690	VF0430	Flagella	Motility
GX	GAS19_RS17785	VF0430	Flagella	Motility
GX	GAS19_RS17795	VF0127	ACF	Others
GX	GAS19_RS18000				B4EJI4	unaffected pathogenicity
GX	GAS19_RS18455				A0A2J9HLA0	reduced virulence
GX	GAS19_RS18475				A0A2J9HL87	reduced virulence
GX	GAS19_RS18890				Q8ZR28	reduced virulence
GX	GAS19_RS19785						toxG
GX	GAS19_RS19790						toxH
GX	GAS19_RS19795						toxI
GX	GAS19_RS19855	VF0974	SCI (Salmonella centrisome island)	Effector delivery system	H9L4I8	reduced virulence
GX	GAS19_RS19860	VF0974	SCI (Salmonella centrisome island)	Effector delivery system	D4I0Q9	unaffected pathogenicity
GX	GAS19_RS20890	VF0504	AdeFGH efflux pump	Biofilm
GX	GAS19_RS21465				Q63KC3	reduced virulence
GX	GAS19_RS21955				A0A076ZMY5	unaffected pathogenicity
GX	GAS19_RS22300						toxJ
GX	GAS19_RS22310						toxI
GX	GAS19_RS22315						toxH
GX	GAS19_RS22320						toxG
GX	GAS19_RS22325						toxF
GX	GAS19_RS22335				Q9LBJ0	reduced virulence	toxA
GX	GAS19_RS22340						toxB
GX	GAS19_RS22345						toxC
GX	GAS19_RS22350						toxD
GX	GAS19_RS22355						toxE
GX	GAS19_RS22680				A8YPP3	unaffected pathogenicity
GX	GAS19_RS22935				C5AMW5	effector (plant avirulence determinant)
GX	GAS19_RS23025						toxJ
GX	GAS19_RS23055	VF0560	Capsule	Immune modulation
GX	GAS19_RS23325				B2SNH4	reduced virulence
GX	GAS19_RS23335				B2SNH3	reduced virulence
GX	GAS19_RS23690	VF0430	Flagella	Motility
GX	GAS19_RS24340						toxI
GX	GAS19_RS24730	VF0569	T6SS	Effector delivery system	D4I234	reduced virulence
GX	GAS19_RS24755	VF0569	T6SS	Effector delivery system	C5AHX3	effector (plant avirulence determinant)
GX	GAS19_RS25050				B4EIW7	increased virulence (hypervirulence)
GX	GAS19_RS25445				B4EJI4	unaffected pathogenicity
GX	GAS19_RS25675	VF0430	Flagella	Motility
GX	GAS19_RS26385	VF0433	Quorum-sensing	Biofilm	Q4VSJ9	unaffected pathogenicity	tofR
GX	GAS19_RS26390				C5AIS7	reduced virulence
GX	GAS19_RS26395	VF0433	Quorum-sensing	Biofilm	Q4VSJ8	unaffected pathogenicity	tofI
GX	GAS19_RS26445						toxB
GX	GAS19_RS26930				A0A0S4VR07	reduced virulence
GX	GAS19_RS27230				Q2T7Q1	reduced virulence
GX	GAS19_RS27235				Q2T7Q2	increased virulence (hypervirulence)
GX	GAS19_RS27375				Q0GYW2	reduced virulence
GX	GAS19_RS27385				Q0GYW4	reduced virulence
GX	GAS19_RS27580						toxF
GX	GAS19_RS27870				P19318	reduced virulence
GX	GAS19_RS29100						tofR
GX	GAS19_RS29555				Q8XDQ1	effector (plant avirulence determinant)
FDAARGOS_949	I6H06_RS00275	VF0430	Flagella	Motility
FDAARGOS_949	I6H06_RS00565				B2SNH3	reduced virulence
FDAARGOS_949	I6H06_RS00575				B2SNH4	reduced virulence
FDAARGOS_949	I6H06_RS00870	VF0560	Capsule	Immune modulation
FDAARGOS_949	I6H06_RS00900						toxJ
FDAARGOS_949	I6H06_RS00990				C5AMW5	effector (plant avirulence determinant)
FDAARGOS_949	I6H06_RS01240				A8YPP3	unaffected pathogenicity
FDAARGOS_949	I6H06_RS01550						toxE
FDAARGOS_949	I6H06_RS01555						toxD
FDAARGOS_949	I6H06_RS01560						toxC
FDAARGOS_949	I6H06_RS01565						toxB
FDAARGOS_949	I6H06_RS01570				Q9LBJ0	reduced virulence
FDAARGOS_949	I6H06_RS01580						toxF
FDAARGOS_949	I6H06_RS01585						toxG
FDAARGOS_949	I6H06_RS01590						toxH
FDAARGOS_949	I6H06_RS01595						toxI
FDAARGOS_949	I6H06_RS01605						toxJ
FDAARGOS_949	I6H06_RS01955				A0A076ZMY5	unaffected pathogenicity
FDAARGOS_949	I6H06_RS30265				Q63KC3	reduced virulence
FDAARGOS_949	I6H06_RS03035	VF0504	AdeFGH efflux pump	Biofilm
FDAARGOS_949	I6H06_RS03770	VF0569	T6SS	Effector delivery system	D4I234	reduced virulence
FDAARGOS_949	I6H06_RS04110				C5ALD1	effector (plant avirulence determinant)
FDAARGOS_949	I6H06_RS04115	VF0974	SCI (Salmonella centrisome island)	Effector delivery system	D4I0Q9	unaffected pathogenicity
FDAARGOS_949	I6H06_RS04120	VF0974	SCI (Salmonella centrisome island)	Effector delivery system	H9L4I8	reduced virulence
FDAARGOS_949	I6H06_RS04185						toxI
FDAARGOS_949	I6H06_RS04190						toxH
FDAARGOS_949	I6H06_RS04195						toxG
FDAARGOS_949	I6H06_RS05085				Q8ZR28	reduced virulence
FDAARGOS_949	I6H06_RS05610				A0A2J9HL87	reduced virulence
FDAARGOS_949	I6H06_RS05630				A0A2J9HLA0	reduced virulence
FDAARGOS_949	I6H06_RS06195				B4EJI4	unaffected pathogenicity
FDAARGOS_949	I6H06_RS06405	VF0430	Flagella	Motility
FDAARGOS_949	I6H06_RS06500	VF0430	Flagella	Motility
FDAARGOS_949	I6H06_RS06670	VF0159	Hsp60	Adherence
FDAARGOS_949	I6H06_RS07680				P19318	reduced virulence
FDAARGOS_949	I6H06_RS07970						toxF
FDAARGOS_949	I6H06_RS08175				Q0GYW4	reduced virulence
FDAARGOS_949	I6H06_RS08185				Q0GYW2	reduced virulence
FDAARGOS_949	I6H06_RS08325				Q2T7Q2	increased virulence (hypervirulence)
FDAARGOS_949	I6H06_RS08330				Q2T7Q1	reduced virulence
FDAARGOS_949	I6H06_RS08640				A0A0S4VR07	reduced virulence
FDAARGOS_949	I6H06_RS09130						toxB
FDAARGOS_949	I6H06_RS09175	VF0433	Quorum-sensing	Biofilm	Q4VSJ8	unaffected pathogenicity	tofI
FDAARGOS_949	I6H06_RS09180				C5AIS7	reduced virulence
FDAARGOS_949	I6H06_RS09930	VF0430	Flagella	Motility
FDAARGOS_949	I6H06_RS10160				B4EJI4	unaffected pathogenicity
FDAARGOS_949	I6H06_RS10560				B4EIW7	increased virulence (hypervirulence)
FDAARGOS_949	I6H06_RS10860	VF0569	T6SS	Effector delivery system	C5AHX3	effector (plant avirulence determinant)
FDAARGOS_949	I6H06_RS10885	VF0569	T6SS	Effector delivery system	D4I234	reduced virulence
FDAARGOS_949	I6H06_RS11290						toxI
FDAARGOS_949	I6H06_RS11755				Q9I2U9	reduced virulence
FDAARGOS_949	I6H06_RS11905						tofR
FDAARGOS_949	I6H06_RS11920				Q8Y282	loss of pathogenicity
FDAARGOS_949	I6H06_RS12485				Q2YJE8	reduced virulence
FDAARGOS_949	I6H06_RS13595				C5AGX2	reduced virulence
FDAARGOS_949	I6H06_RS14715	VF0433	Quorum-sensing	Biofilm
FDAARGOS_949	I6H06_RS14975				C5AG42	reduced virulence
FDAARGOS_949	I6H06_RS15335				A8YPP2	unaffected pathogenicity
FDAARGOS_949	I6H06_RS15630				C5AFJ6	reduced virulence
FDAARGOS_949	I6H06_RS15670				Q4UUL4	reduced virulence
FDAARGOS_949	I6H06_RS16170				Q8PBY5	reduced virulence
FDAARGOS_949	I6H06_RS16175				Q8PBY6	reduced virulence
FDAARGOS_949	I6H06_RS16305				Q63T64	reduced virulence
FDAARGOS_949	I6H06_RS17325				A0A069B091	reduced virulence
FDAARGOS_949	I6H06_RS18005	VF0432	CdpA	Regulation	B4ED05	increased virulence (hypervirulence)
FDAARGOS_949	I6H06_RS18325				Q8Y0J2	lethal
FDAARGOS_949	I6H06_RS18490				Q8ZPL7	reduced virulence
FDAARGOS_949	I6H06_RS18715				C5ACN1	reduced virulence
FDAARGOS_949	I6H06_RS18740				Q75WC5	chemistry target: sensitivity to chemical
FDAARGOS_949	I6H06_RS19145						toxE
FDAARGOS_949	I6H06_RS19395				A0A2J9HCW0	reduced virulence
FDAARGOS_949	I6H06_RS19505				Q9HU22	reduced virulence
FDAARGOS_949	I6H06_RS19565	VF0159	Hsp60	Adherence
FDAARGOS_949	I6H06_RS19680				B4ECX9	increased virulence (hypervirulence)
FDAARGOS_949	I6H06_RS19695				Q63RC4	unaffected pathogenicity
FDAARGOS_949	I6H06_RS19800	VF0436	Capsule I	Immune modulation	Q9AI28	reduced virulence
FDAARGOS_949	I6H06_RS19805	VF0436	Capsule I	Immune modulation	Q63R85	reduced virulence
FDAARGOS_949	I6H06_RS19810	VF0436	Capsule I	Immune modulation
FDAARGOS_949	I6H06_RS19820	VF0436	Capsule I	Immune modulation
FDAARGOS_949	I6H06_RS19875	VF0436	Capsule I	Immune modulation
FDAARGOS_949	I6H06_RS19890	VF0436	Capsule I	Immune modulation
FDAARGOS_949	I6H06_RS20025				Q8XW15	loss of pathogenicity
FDAARGOS_949	I6H06_RS20720	VF0431	Type IV pili	Adherence
FDAARGOS_949	I6H06_RS20730	VF0431	Type IV pili	Adherence
FDAARGOS_949	I6H06_RS20905				A0A088U4K2	reduced virulence
FDAARGOS_949	I6H06_RS20910				A0A088UAI6	reduced virulence
FDAARGOS_949	I6H06_RS20915				A0A1V2Y2U7	increased virulence (hypervirulence)
FDAARGOS_949	I6H06_RS20920				Q63QH7	reduced virulence
FDAARGOS_949	I6H06_RS21135				B4E6S3	unaffected pathogenicity
FDAARGOS_949	I6H06_RS21155				A0A5H2Q4P9	reduced virulence
FDAARGOS_949	I6H06_RS21175				C5AA67	effector (plant avirulence determinant)
FDAARGOS_949	I6H06_RS21535				C5A9K4	reduced virulence
FDAARGOS_949	I6H06_RS21545				C5A9K2	effector (plant avirulence determinant)
FDAARGOS_949	I6H06_RS21715				Q7VTC1	unaffected pathogenicity
FDAARGOS_949	I6H06_RS21775	VF0460	EF-Tu	Adherence	W8TRT9	increased virulence (hypervirulence)
FDAARGOS_949	I6H06_RS21855	VF0460	EF-Tu	Adherence	W8TRT9	increased virulence (hypervirulence)
FDAARGOS_949	I6H06_RS21905				B4E5A2	reduced virulence
FDAARGOS_949	I6H06_RS21910				B4E5A1	reduced virulence
FDAARGOS_949	I6H06_RS21915				B4E5A0	reduced virulence
FDAARGOS_949	I6H06_RS21920				B4E599	reduced virulence
FDAARGOS_949	I6H06_RS21925				B4E598	reduced virulence
FDAARGOS_949	I6H06_RS22025				C5A8Z0	reduced virulence
FDAARGOS_949	I6H06_RS22240	VF0430	Flagella	Motility
FDAARGOS_949	I6H06_RS22245	VF0430	Flagella	Motility
FDAARGOS_949	I6H06_RS22255	VF0430	Flagella	Motility
FDAARGOS_949	I6H06_RS22260	VF0430	Flagella	Motility
FDAARGOS_949	I6H06_RS22280	VF0430	Flagella	Motility
FDAARGOS_949	I6H06_RS22285	VF0430	Flagella	Motility	P0A2D5	reduced virulence
FDAARGOS_949	I6H06_RS22290	VF0430	Flagella	Motility	P04042	reduced virulence
FDAARGOS_949	I6H06_RS22295	VF0430	Flagella	Motility
FDAARGOS_949	I6H06_RS22300	VF0430	Flagella	Motility
FDAARGOS_949	I6H06_RS22305	VF0430	Flagella	Motility
FDAARGOS_949	I6H06_RS22310	VF0430	Flagella	Motility	P0A964	unaffected pathogenicity
FDAARGOS_949	I6H06_RS22315	VF0430	Flagella	Motility
FDAARGOS_949	I6H06_RS22325	VF0430	Flagella	Motility
FDAARGOS_949	I6H06_RS22330	VF0430	Flagella	Motility
FDAARGOS_949	I6H06_RS22335						flhC
FDAARGOS_949	I6H06_RS22340				C5A8V0	reduced virulence	flhD
FDAARGOS_949	I6H06_RS22375	VF0430	Flagella	Motility
FDAARGOS_949	I6H06_RS22395				A0A0J9WXH4	increased virulence (hypervirulence)
FDAARGOS_949	I6H06_RS23010				C5A846	reduced virulence
FDAARGOS_949	I6H06_RS23015				C5A845	reduced virulence
FDAARGOS_949	I6H06_RS23150	VF0430	Flagella	Motility
FDAARGOS_949	I6H06_RS23155	VF0430	Flagella	Motility
FDAARGOS_949	I6H06_RS23160	VF0430	Flagella	Motility
FDAARGOS_949	I6H06_RS23165	VF0430	Flagella	Motility
FDAARGOS_949	I6H06_RS23170	VF0430	Flagella	Motility
FDAARGOS_949	I6H06_RS23175	VF0430	Flagella	Motility
FDAARGOS_949	I6H06_RS23765	VF0430	Flagella	Motility
FDAARGOS_949	I6H06_RS23770	VF0430	Flagella	Motility
FDAARGOS_949	I6H06_RS23775	VF0430	Flagella	Motility
FDAARGOS_949	I6H06_RS23780	VF0430	Flagella	Motility
FDAARGOS_949	I6H06_RS23785	VF0430	Flagella	Motility
FDAARGOS_949	I6H06_RS23790	VF0430	Flagella	Motility
FDAARGOS_949	I6H06_RS23795	VF0430	Flagella	Motility
FDAARGOS_949	I6H06_RS23800	VF0430	Flagella	Motility
FDAARGOS_949	I6H06_RS23835				B4E8H7	reduced virulence
FDAARGOS_949	I6H06_RS23960	VF0430	Flagella	Motility
FDAARGOS_949	I6H06_RS23965	VF0430	Flagella	Motility
FDAARGOS_949	I6H06_RS23970	VF0430	Flagella	Motility
FDAARGOS_949	I6H06_RS23985	VF0430	Flagella	Motility
FDAARGOS_949	I6H06_RS23990	VF0430	Flagella	Motility
FDAARGOS_949	I6H06_RS23995	VF0430	Flagella	Motility
FDAARGOS_949	I6H06_RS24000	VF0430	Flagella	Motility
FDAARGOS_949	I6H06_RS24305				B4E974	increased virulence (hypervirulence)
FDAARGOS_949	I6H06_RS25165				Q8Y282	loss of pathogenicity
FDAARGOS_949	I6H06_RS25230				C5AD21	reduced virulence
FDAARGOS_949	I6H06_RS25645	VF0431	Type IV pili	Adherence
FDAARGOS_949	I6H06_RS25650				C5ACT8	reduced virulence
FDAARGOS_949	I6H06_RS25810						toxI
FDAARGOS_949	I6H06_RS26095				B4E9E8	increased virulence (hypervirulence)
FDAARGOS_949	I6H06_RS26200				A0A0K0GLJ4	unaffected pathogenicity
FDAARGOS_949	I6H06_RS26645				Q8XWV5	loss of pathogenicity
FDAARGOS_949	I6H06_RS27240				B4E6H5	reduced virulence
FDAARGOS_949	I6H06_RS28240				A0A088U1Z5	unaffected pathogenicity
FDAARGOS_949	I6H06_RS28380				B4EDS9	reduced virulence
FDAARGOS_949	I6H06_RS28395				A0A0L9JQ40	reduced virulence
FDAARGOS_949	I6H06_RS30150				Q8XDQ1	effector (plant avirulence determinant)
FDAARGOS_921	I6G78_RS01625				Q8PBY6	reduced virulence
FDAARGOS_921	I6G78_RS01630				Q8PBY5	reduced virulence
FDAARGOS_921	I6G78_RS02130				Q4UUL4	reduced virulence
FDAARGOS_921	I6G78_RS02170				C5AFJ6	reduced virulence
FDAARGOS_921	I6G78_RS02465				A8YPP2	unaffected pathogenicity
FDAARGOS_921	I6G78_RS02825				C5AG42	reduced virulence
FDAARGOS_921	I6G78_RS03085	VF0433	Quorum-sensing	Biofilm
FDAARGOS_921	I6G78_RS04200				C5AGX2	reduced virulence
FDAARGOS_921	I6G78_RS05310				Q2YJE8	reduced virulence
FDAARGOS_921	I6G78_RS05870				Q8Y282	loss of pathogenicity
FDAARGOS_921	I6G78_RS05885						tofR
FDAARGOS_921	I6G78_RS06035				Q9I2U9	reduced virulence
FDAARGOS_921	I6G78_RS06295				A0A0L9JQ40	reduced virulence
FDAARGOS_921	I6G78_RS06310				B4EDS9	reduced virulence
FDAARGOS_921	I6G78_RS06450				A0A088U1Z5	unaffected pathogenicity
FDAARGOS_921	I6G78_RS07455				B4E6H5	reduced virulence
FDAARGOS_921	I6G78_RS08050				Q8XWV5	loss of pathogenicity
FDAARGOS_921	I6G78_RS08495				A0A0K0GLJ4	unaffected pathogenicity
FDAARGOS_921	I6G78_RS08600				B4E9E8	increased virulence (hypervirulence)
FDAARGOS_921	I6G78_RS08885						toxI
FDAARGOS_921	I6G78_RS09045				C5ACT8	reduced virulence
FDAARGOS_921	I6G78_RS09050	VF0431	Type IV pili	Adherence
FDAARGOS_921	I6G78_RS09465				C5AD21	reduced virulence
FDAARGOS_921	I6G78_RS09530				Q8Y282	loss of pathogenicity
FDAARGOS_921	I6G78_RS10390				B4E974	increased virulence (hypervirulence)
FDAARGOS_921	I6G78_RS10695	VF0430	Flagella	Motility
FDAARGOS_921	I6G78_RS10700	VF0430	Flagella	Motility
FDAARGOS_921	I6G78_RS10705	VF0430	Flagella	Motility
FDAARGOS_921	I6G78_RS10710	VF0430	Flagella	Motility
FDAARGOS_921	I6G78_RS10725	VF0430	Flagella	Motility
FDAARGOS_921	I6G78_RS10730	VF0430	Flagella	Motility
FDAARGOS_921	I6G78_RS10735	VF0430	Flagella	Motility
FDAARGOS_921	I6G78_RS10860				B4E8H7	reduced virulence
FDAARGOS_921	I6G78_RS10895	VF0430	Flagella	Motility
FDAARGOS_921	I6G78_RS10900	VF0430	Flagella	Motility
FDAARGOS_921	I6G78_RS10905	VF0430	Flagella	Motility
FDAARGOS_921	I6G78_RS10910	VF0430	Flagella	Motility
FDAARGOS_921	I6G78_RS10915	VF0430	Flagella	Motility
FDAARGOS_921	I6G78_RS10920	VF0430	Flagella	Motility
FDAARGOS_921	I6G78_RS10925	VF0430	Flagella	Motility
FDAARGOS_921	I6G78_RS10930	VF0430	Flagella	Motility
FDAARGOS_921	I6G78_RS11515	VF0430	Flagella	Motility
FDAARGOS_921	I6G78_RS11520	VF0430	Flagella	Motility
FDAARGOS_921	I6G78_RS11525	VF0430	Flagella	Motility
FDAARGOS_921	I6G78_RS11530	VF0430	Flagella	Motility
FDAARGOS_921	I6G78_RS11535	VF0430	Flagella	Motility
FDAARGOS_921	I6G78_RS11540	VF0430	Flagella	Motility
FDAARGOS_921	I6G78_RS11680				C5A845	reduced virulence
FDAARGOS_921	I6G78_RS11685				C5A846	reduced virulence
FDAARGOS_921	I6G78_RS12295				A0A0J9WXH4	increased virulence (hypervirulence)
FDAARGOS_921	I6G78_RS12315	VF0430	Flagella	Motility
FDAARGOS_921	I6G78_RS12350				C5A8V0	reduced virulence	flhD
FDAARGOS_921	I6G78_RS12355						flhC
FDAARGOS_921	I6G78_RS12360	VF0430	Flagella	Motility
FDAARGOS_921	I6G78_RS12365	VF0430	Flagella	Motility
FDAARGOS_921	I6G78_RS12375	VF0430	Flagella	Motility
FDAARGOS_921	I6G78_RS12380	VF0430	Flagella	Motility	P0A964	unaffected pathogenicity
FDAARGOS_921	I6G78_RS12385	VF0430	Flagella	Motility
FDAARGOS_921	I6G78_RS12390	VF0430	Flagella	Motility
FDAARGOS_921	I6G78_RS12395	VF0430	Flagella	Motility
FDAARGOS_921	I6G78_RS12400	VF0430	Flagella	Motility	P04042	reduced virulence
FDAARGOS_921	I6G78_RS12405	VF0430	Flagella	Motility	P0A2D5	reduced virulence
FDAARGOS_921	I6G78_RS12410	VF0430	Flagella	Motility
FDAARGOS_921	I6G78_RS12430	VF0430	Flagella	Motility
FDAARGOS_921	I6G78_RS12435	VF0430	Flagella	Motility
FDAARGOS_921	I6G78_RS12445	VF0430	Flagella	Motility
FDAARGOS_921	I6G78_RS12450	VF0430	Flagella	Motility
FDAARGOS_921	I6G78_RS12665				C5A8Z0	reduced virulence
FDAARGOS_921	I6G78_RS12765				B4E598	reduced virulence
FDAARGOS_921	I6G78_RS12770				B4E599	reduced virulence
FDAARGOS_921	I6G78_RS12775				B4E5A0	reduced virulence
FDAARGOS_921	I6G78_RS12780				B4E5A1	reduced virulence
FDAARGOS_921	I6G78_RS12785				B4E5A2	reduced virulence
FDAARGOS_921	I6G78_RS12835	VF0460	EF-Tu	Adherence	W8TRT9	increased virulence (hypervirulence)
FDAARGOS_921	I6G78_RS12915	VF0460	EF-Tu	Adherence	W8TRT9	increased virulence (hypervirulence)
FDAARGOS_921	I6G78_RS12975				Q7VTC1	unaffected pathogenicity
FDAARGOS_921	I6G78_RS13145				C5A9K2	effector (plant avirulence determinant)
FDAARGOS_921	I6G78_RS13155				C5A9K4	reduced virulence
FDAARGOS_921	I6G78_RS13520				C5AA67	effector (plant avirulence determinant)
FDAARGOS_921	I6G78_RS13540				A0A5H2Q4P9	reduced virulence
FDAARGOS_921	I6G78_RS13560				B4E6S3	unaffected pathogenicity
FDAARGOS_921	I6G78_RS13775				Q63QH7	reduced virulence
FDAARGOS_921	I6G78_RS13780				A0A1V2Y2U7	increased virulence (hypervirulence)
FDAARGOS_921	I6G78_RS13785				A0A088UAI6	reduced virulence
FDAARGOS_921	I6G78_RS13790				A0A088U4K2	reduced virulence
FDAARGOS_921	I6G78_RS13965	VF0431	Type IV pili	Adherence
FDAARGOS_921	I6G78_RS13975	VF0431	Type IV pili	Adherence
FDAARGOS_921	I6G78_RS14670				Q8XW15	loss of pathogenicity
FDAARGOS_921	I6G78_RS14805	VF0436	Capsule I	Immune modulation
FDAARGOS_921	I6G78_RS14820	VF0436	Capsule I	Immune modulation
FDAARGOS_921	I6G78_RS14875	VF0436	Capsule I	Immune modulation
FDAARGOS_921	I6G78_RS14885	VF0436	Capsule I	Immune modulation
FDAARGOS_921	I6G78_RS14890	VF0436	Capsule I	Immune modulation	Q63R85	reduced virulence
FDAARGOS_921	I6G78_RS14895	VF0436	Capsule I	Immune modulation	Q9AI28	reduced virulence
FDAARGOS_921	I6G78_RS15000				Q63RC4	unaffected pathogenicity
FDAARGOS_921	I6G78_RS15015				B4ECX9	increased virulence (hypervirulence)
FDAARGOS_921	I6G78_RS15130	VF0159	Hsp60	Adherence
FDAARGOS_921	I6G78_RS15190				Q9HU22	reduced virulence
FDAARGOS_921	I6G78_RS15300				A0A2J9HCW0	reduced virulence
FDAARGOS_921	I6G78_RS15550						toxE
FDAARGOS_921	I6G78_RS15950				Q75WC5	chemistry target: sensitivity to chemical
FDAARGOS_921	I6G78_RS15975				C5ACN1	reduced virulence
FDAARGOS_921	I6G78_RS16200				Q8ZPL7	reduced virulence
FDAARGOS_921	I6G78_RS16365				Q8Y0J2	lethal
FDAARGOS_921	I6G78_RS16685	VF0432	CdpA	Regulation	B4ED05	increased virulence (hypervirulence)
FDAARGOS_921	I6G78_RS17365				A0A069B091	reduced virulence
FDAARGOS_921	I6G78_RS18380				Q63T64	reduced virulence
FDAARGOS_921	I6G78_RS18615				B4EIW7	increased virulence (hypervirulence)
FDAARGOS_921	I6G78_RS18915	VF0569	T6SS	Effector delivery system	C5AHX3	effector (plant avirulence determinant)
FDAARGOS_921	I6G78_RS18940	VF0569	T6SS	Effector delivery system	D4I234	reduced virulence
FDAARGOS_921	I6G78_RS19345						toxI
FDAARGOS_921	I6G78_RS20010	VF0430	Flagella	Motility
FDAARGOS_921	I6G78_RS20300				B2SNH3	reduced virulence
FDAARGOS_921	I6G78_RS20310				B2SNH4	reduced virulence
FDAARGOS_921	I6G78_RS20605	VF0560	Capsule	Immune modulation
FDAARGOS_921	I6G78_RS20635						toxJ
FDAARGOS_921	I6G78_RS20725				C5AMW5	effector (plant avirulence determinant)
FDAARGOS_921	I6G78_RS20975				A8YPP3	unaffected pathogenicity
FDAARGOS_921	I6G78_RS21285						toxE
FDAARGOS_921	I6G78_RS21290						toxD
FDAARGOS_921	I6G78_RS21295						toxC
FDAARGOS_921	I6G78_RS21300						toxB
FDAARGOS_921	I6G78_RS21305				Q9LBJ0	reduced virulence
FDAARGOS_921	I6G78_RS21315						toxF
FDAARGOS_921	I6G78_RS21320						toxG
FDAARGOS_921	I6G78_RS21325						toxH
FDAARGOS_921	I6G78_RS21330						toxI
FDAARGOS_921	I6G78_RS21340						toxJ
FDAARGOS_921	I6G78_RS21690				A0A076ZMY5	unaffected pathogenicity
FDAARGOS_921	I6G78_RS30695				Q63KC3	reduced virulence
FDAARGOS_921	I6G78_RS22770	VF0504	AdeFGH efflux pump	Biofilm
FDAARGOS_921	I6G78_RS23500	VF0569	T6SS	Effector delivery system	D4I234	reduced virulence
FDAARGOS_921	I6G78_RS23840				C5ALD1	effector (plant avirulence determinant)
FDAARGOS_921	I6G78_RS23845	VF0974	SCI (Salmonella centrisome island)	Effector delivery system	D4I0Q9	unaffected pathogenicity
FDAARGOS_921	I6G78_RS23850	VF0974	SCI (Salmonella centrisome island)	Effector delivery system	H9L4I8	reduced virulence
FDAARGOS_921	I6G78_RS23915						toxI
FDAARGOS_921	I6G78_RS23920						toxH
FDAARGOS_921	I6G78_RS23925						toxG
FDAARGOS_921	I6G78_RS24810				Q8ZR28	reduced virulence
FDAARGOS_921	I6G78_RS25330				A0A2J9HL87	reduced virulence
FDAARGOS_921	I6G78_RS25350				A0A2J9HLA0	reduced virulence
FDAARGOS_921	I6G78_RS25910				B4EJI4	unaffected pathogenicity
FDAARGOS_921	I6G78_RS26120	VF0430	Flagella	Motility
FDAARGOS_921	I6G78_RS26215	VF0430	Flagella	Motility
FDAARGOS_921	I6G78_RS26385	VF0159	Hsp60	Adherence
FDAARGOS_921	I6G78_RS27395				P19318	reduced virulence
FDAARGOS_921	I6G78_RS27685						toxF
FDAARGOS_921	I6G78_RS27885				Q0GYW4	reduced virulence
FDAARGOS_921	I6G78_RS27895				Q0GYW2	reduced virulence
FDAARGOS_921	I6G78_RS28035				Q2T7Q2	increased virulence (hypervirulence)
FDAARGOS_921	I6G78_RS28040				Q2T7Q1	reduced virulence
FDAARGOS_921	I6G78_RS28350				A0A0S4VR07	reduced virulence
FDAARGOS_921	I6G78_RS28835						toxB
FDAARGOS_921	I6G78_RS28880	VF0433	Quorum-sensing	Biofilm	Q4VSJ8	unaffected pathogenicity	tofI
FDAARGOS_921	I6G78_RS28885				C5AIS7	reduced virulence
FDAARGOS_921	I6G78_RS29635	VF0430	Flagella	Motility
FDAARGOS_921	I6G78_RS29860				B4EJI4	unaffected pathogenicity
FDAARGOS_921	I6G78_RS00465				Q8XDQ1	effector (plant avirulence determinant)
HN1	HJC54_RS13190				A0A069B091	reduced virulence
HN1	HJC54_RS13625						tofR
HN1	HJC54_RS14200				Q2YJE8	reduced virulence
HN1	HJC54_RS14860				C5AGX2	reduced virulence
HN1	HJC54_RS16105				C5AG42	reduced virulence
HN1	HJC54_RS16440				A8YPP2	unaffected pathogenicity
HN1	HJC54_RS16745				C5AFJ6	reduced virulence
HN1	HJC54_RS16785				Q4UUL4	reduced virulence
HN1	HJC54_RS17290				Q8PBY5	reduced virulence
HN1	HJC54_RS17295				Q8PBY6	reduced virulence
HN1	HJC54_RS17420				Q63T64	reduced virulence
HN1	HJC54_RS18300				Q9I2U9	reduced virulence
HN1	HJC54_RS18560				A0A0L9JQ40	reduced virulence
HN1	HJC54_RS18575				B4EDS9	reduced virulence
HN1	HJC54_RS18715				A0A088U1Z5	unaffected pathogenicity
HN1	HJC54_RS19705				B4E6H5	reduced virulence
HN1	HJC54_RS20480				Q8XWV5	loss of pathogenicity
HN1	HJC54_RS20920				A0A0K0GLJ4	unaffected pathogenicity
HN1	HJC54_RS21025				B4E9E8	increased virulence (hypervirulence)
HN1	HJC54_RS21310						toxI
HN1	HJC54_RS21470				C5ACT8	reduced virulence
HN1	HJC54_RS21475	VF0431	Type IV pili	Adherence
HN1	HJC54_RS21895				C5AD21	reduced virulence
HN1	HJC54_RS22850				B4E974	increased virulence (hypervirulence)
HN1	HJC54_RS23230	VF0430	Flagella	Motility
HN1	HJC54_RS23235	VF0430	Flagella	Motility
HN1	HJC54_RS23240	VF0430	Flagella	Motility
HN1	HJC54_RS23245	VF0430	Flagella	Motility
HN1	HJC54_RS23260	VF0430	Flagella	Motility
HN1	HJC54_RS23265	VF0430	Flagella	Motility
HN1	HJC54_RS23270	VF0430	Flagella	Motility
HN1	HJC54_RS23395				B4E8H7	reduced virulence
HN1	HJC54_RS23430	VF0430	Flagella	Motility
HN1	HJC54_RS23435	VF0430	Flagella	Motility
HN1	HJC54_RS23440	VF0430	Flagella	Motility
HN1	HJC54_RS23445	VF0430	Flagella	Motility
HN1	HJC54_RS23450	VF0430	Flagella	Motility
HN1	HJC54_RS23455	VF0430	Flagella	Motility
HN1	HJC54_RS23460	VF0430	Flagella	Motility
HN1	HJC54_RS23465	VF0430	Flagella	Motility
HN1	HJC54_RS24070	VF0430	Flagella	Motility
HN1	HJC54_RS24075	VF0430	Flagella	Motility
HN1	HJC54_RS24080	VF0430	Flagella	Motility
HN1	HJC54_RS24085	VF0430	Flagella	Motility
HN1	HJC54_RS24090	VF0430	Flagella	Motility
HN1	HJC54_RS24095	VF0430	Flagella	Motility
HN1	HJC54_RS24230				C5A845	reduced virulence
HN1	HJC54_RS24235				C5A846	reduced virulence
HN1	HJC54_RS24575				A0A0J9WXH4	increased virulence (hypervirulence)
HN1	HJC54_RS24595	VF0430	Flagella	Motility
HN1	HJC54_RS24630				C5A8V0	reduced virulence	flhD
HN1	HJC54_RS24635						flhC
HN1	HJC54_RS24640	VF0430	Flagella	Motility
HN1	HJC54_RS24645	VF0430	Flagella	Motility
HN1	HJC54_RS24660	VF0430	Flagella	Motility	P0A964	unaffected pathogenicity
HN1	HJC54_RS24665	VF0430	Flagella	Motility
HN1	HJC54_RS24670	VF0430	Flagella	Motility
HN1	HJC54_RS24675	VF0430	Flagella	Motility
HN1	HJC54_RS24680	VF0430	Flagella	Motility	P04042	reduced virulence
HN1	HJC54_RS24685	VF0430	Flagella	Motility	P0A2D5	reduced virulence
HN1	HJC54_RS24690	VF0430	Flagella	Motility
HN1	HJC54_RS24710	VF0430	Flagella	Motility
HN1	HJC54_RS24715	VF0430	Flagella	Motility
HN1	HJC54_RS24725	VF0430	Flagella	Motility
HN1	HJC54_RS24730	VF0430	Flagella	Motility
HN1	HJC54_RS24835				C5A8Z0	reduced virulence
HN1	HJC54_RS24935				B4E598	reduced virulence
HN1	HJC54_RS24940				B4E599	reduced virulence
HN1	HJC54_RS24945				B4E5A0	reduced virulence
HN1	HJC54_RS24950				B4E5A1	reduced virulence
HN1	HJC54_RS24955				B4E5A2	reduced virulence
HN1	HJC54_RS25005	VF0460	EF-Tu	Adherence	W8TRT9	increased virulence (hypervirulence)
HN1	HJC54_RS25080	VF0460	EF-Tu	Adherence	W8TRT9	increased virulence (hypervirulence)
HN1	HJC54_RS25140				Q7VTC1	unaffected pathogenicity
HN1	HJC54_RS25310				C5A9K2	effector (plant avirulence determinant)
HN1	HJC54_RS25320				C5A9K4	reduced virulence
HN1	HJC54_RS25710				C5AA67	effector (plant avirulence determinant)
HN1	HJC54_RS25730				A0A5H2Q4P9	reduced virulence
HN1	HJC54_RS25750				B4E6S3	unaffected pathogenicity
HN1	HJC54_RS25965				Q63QH7	reduced virulence
HN1	HJC54_RS25970				A0A1V2Y2U7	increased virulence (hypervirulence)
HN1	HJC54_RS25975				A0A088UAI6	reduced virulence
HN1	HJC54_RS25980				A0A088U4K2	reduced virulence
HN1	HJC54_RS26155	VF0431	Type IV pili	Adherence
HN1	HJC54_RS26165	VF0431	Type IV pili	Adherence
HN1	HJC54_RS26860				Q8XW15	loss of pathogenicity
HN1	HJC54_RS26995	VF0436	Capsule I	Immune modulation
HN1	HJC54_RS27010	VF0436	Capsule I	Immune modulation
HN1	HJC54_RS27065	VF0436	Capsule I	Immune modulation
HN1	HJC54_RS27075	VF0436	Capsule I	Immune modulation
HN1	HJC54_RS27080	VF0436	Capsule I	Immune modulation	Q63R85	reduced virulence
HN1	HJC54_RS27085	VF0436	Capsule I	Immune modulation	Q9AI28	reduced virulence
HN1	HJC54_RS27190				Q63RC4	unaffected pathogenicity
HN1	HJC54_RS27205				B4ECX9	increased virulence (hypervirulence)
HN1	HJC54_RS27320	VF0159	Hsp60	Adherence
HN1	HJC54_RS27380				Q9HU22	reduced virulence
HN1	HJC54_RS27490				A0A2J9HCW0	reduced virulence
HN1	HJC54_RS27830						toxE
HN1	HJC54_RS28230				Q75WC5	chemistry target: sensitivity to chemical
HN1	HJC54_RS28255				C5ACN1	reduced virulence
HN1	HJC54_RS28480				Q8ZPL7	reduced virulence
HN1	HJC54_RS28645				Q8Y0J2	lethal
HN1	HJC54_RS28970	VF0432	CdpA	Regulation	B4ED05	increased virulence (hypervirulence)
HN1	HJC54_RS29000				A4KCQ2	reduced virulence	qsmR
HN1	HJC54_RS00440				B2SNH3	reduced virulence
HN1	HJC54_RS00450				B2SNH4	reduced virulence
HN1	HJC54_RS00730	VF0560	Capsule	Immune modulation
HN1	HJC54_RS00760						toxJ
HN1	HJC54_RS00850				C5AMW5	effector (plant avirulence determinant)
HN1	HJC54_RS01095				A8YPP3	unaffected pathogenicity
HN1	HJC54_RS01560				Q2T7Q1	reduced virulence
HN1	HJC54_RS01565				Q2T7Q2	increased virulence (hypervirulence)
HN1	HJC54_RS01705				Q0GYW2	reduced virulence
HN1	HJC54_RS01715				Q0GYW4	reduced virulence
HN1	HJC54_RS01915						toxF
HN1	HJC54_RS02200				P19318	reduced virulence
HN1	HJC54_RS03220	VF0159	Hsp60	Adherence
HN1	HJC54_RS03390	VF0430	Flagella	Motility
HN1	HJC54_RS03485	VF0430	Flagella	Motility
HN1	HJC54_RS03490	VF0127	ACF	Others
HN1	HJC54_RS03695				B4EJI4	unaffected pathogenicity
HN1	HJC54_RS04200				A0A2J9HLA0	reduced virulence
HN1	HJC54_RS04220				A0A2J9HL87	reduced virulence
HN1	HJC54_RS04740				Q8ZR28	reduced virulence
HN1	HJC54_RS05635						toxG
HN1	HJC54_RS05640						toxH
HN1	HJC54_RS05645						toxI
HN1	HJC54_RS05720	VF0974	SCI (Salmonella centrisome island)	Effector delivery system	H9L4I8	reduced virulence
HN1	HJC54_RS05725	VF0974	SCI (Salmonella centrisome island)	Effector delivery system	D4I0Q9	unaffected pathogenicity
HN1	HJC54_RS05730				C5ALD1	effector (plant avirulence determinant)
HN1	HJC54_RS06060	VF0569	T6SS	Effector delivery system	D4I234	reduced virulence
HN1	HJC54_RS06785	VF0504	AdeFGH efflux pump	Biofilm
HN1	HJC54_RS07355				Q63KC3	reduced virulence
HN1	HJC54_RS07825				A0A076ZMY5	unaffected pathogenicity
HN1	HJC54_RS08180						toxJ
HN1	HJC54_RS08190						toxI
HN1	HJC54_RS08195						toxH
HN1	HJC54_RS08200						toxG
HN1	HJC54_RS08205						toxF
HN1	HJC54_RS08215				Q9LBJ0	reduced virulence	toxA
HN1	HJC54_RS08220						toxB
HN1	HJC54_RS08225						toxC
HN1	HJC54_RS08230						toxD
HN1	HJC54_RS08235						toxE
HN1	HJC54_RS08580				A0A0S4VR07	reduced virulence
HN1	HJC54_RS09070						toxB
HN1	HJC54_RS09120	VF0433	Quorum-sensing	Biofilm	Q4VSJ8	unaffected pathogenicity	tofI
HN1	HJC54_RS09125				C5AIS7	reduced virulence
HN1	HJC54_RS09130	VF0433	Quorum-sensing	Biofilm	Q4VSJ9	unaffected pathogenicity	tofR
HN1	HJC54_RS09865	VF0430	Flagella	Motility
HN1	HJC54_RS10075				B4EJI4	unaffected pathogenicity
HN1	HJC54_RS10450				B4EIW7	increased virulence (hypervirulence)
HN1	HJC54_RS10655	VF0569	T6SS	Effector delivery system	C5AHX3	effector (plant avirulence determinant)
HN1	HJC54_RS10680	VF0569	T6SS	Effector delivery system	D4I234	reduced virulence
HN1	HJC54_RS11080						toxI
411gr-6	B7760_RS00555				Q8XW15	loss of pathogenicity
411gr-6	B7760_RS00705	VF0436	Capsule I	Immune modulation
411gr-6	B7760_RS00760	VF0436	Capsule I	Immune modulation
411gr-6	B7760_RS00770	VF0436	Capsule I	Immune modulation
411gr-6	B7760_RS00775	VF0436	Capsule I	Immune modulation	Q63R85	reduced virulence
411gr-6	B7760_RS00780	VF0436	Capsule I	Immune modulation	Q9AI28	reduced virulence
411gr-6	B7760_RS00885				Q63RC4	unaffected pathogenicity
411gr-6	B7760_RS00900				B4ECX9	increased virulence (hypervirulence)
411gr-6	B7760_RS01020	VF0159	Hsp60	Adherence
411gr-6	B7760_RS01080				Q9HU22	reduced virulence
411gr-6	B7760_RS01190				A0A2J9HCW0	reduced virulence
411gr-6	B7760_RS01395						toxE
411gr-6	B7760_RS01800				Q75WC5	chemistry target: sensitivity to chemical
411gr-6	B7760_RS02045				Q8ZPL7	reduced virulence
411gr-6	B7760_RS02210				Q8Y0J2	lethal
411gr-6	B7760_RS02535	VF0432	CdpA	Regulation	B4ED05	increased virulence (hypervirulence)
411gr-6	B7760_RS02565				A4KCQ2	reduced virulence	qsmR
411gr-6	B7760_RS03230				A0A069B091	reduced virulence
411gr-6	B7760_RS03800						tofR
411gr-6	B7760_RS03810				Q8Y282	loss of pathogenicity
411gr-6	B7760_RS04400				Q2YJE8	reduced virulence
411gr-6	B7760_RS05060				C5AGX2	reduced virulence
411gr-6	B7760_RS05965	VF0433	Quorum-sensing	Biofilm
411gr-6	B7760_RS06230				C5AG42	reduced virulence
411gr-6	B7760_RS06565				A8YPP2	unaffected pathogenicity
411gr-6	B7760_RS06865				C5AFJ6	reduced virulence
411gr-6	B7760_RS06905				Q4UUL4	reduced virulence
411gr-6	B7760_RS07420				Q8PBY5	reduced virulence
411gr-6	B7760_RS07425				Q8PBY6	reduced virulence
411gr-6	B7760_RS07560				Q63T64	reduced virulence
411gr-6	B7760_RS08185				Q9I2U9	reduced virulence
411gr-6	B7760_RS08445				A0A0L9JQ40	reduced virulence
411gr-6	B7760_RS08460				B4EDS9	reduced virulence
411gr-6	B7760_RS08920				A0A088U1Z5	unaffected pathogenicity
411gr-6	B7760_RS10590				Q8XWV5	loss of pathogenicity
411gr-6	B7760_RS10985				A0A0K0GLJ4	unaffected pathogenicity
411gr-6	B7760_RS11090				B4E9E8	increased virulence (hypervirulence)
411gr-6	B7760_RS11375						toxI
411gr-6	B7760_RS11535				C5ACT8	reduced virulence
411gr-6	B7760_RS11540	VF0431	Type IV pili	Adherence
411gr-6	B7760_RS11955				C5AD21	reduced virulence
411gr-6	B7760_RS12020				Q8Y282	loss of pathogenicity
411gr-6	B7760_RS12880				B4E974	increased virulence (hypervirulence)
411gr-6	B7760_RS13190	VF0430	Flagella	Motility
411gr-6	B7760_RS13195	VF0430	Flagella	Motility
411gr-6	B7760_RS13200	VF0430	Flagella	Motility
411gr-6	B7760_RS13205	VF0430	Flagella	Motility
411gr-6	B7760_RS13220	VF0430	Flagella	Motility
411gr-6	B7760_RS13225	VF0430	Flagella	Motility
411gr-6	B7760_RS13230	VF0430	Flagella	Motility
411gr-6	B7760_RS13355				B4E8H7	reduced virulence
411gr-6	B7760_RS13390	VF0430	Flagella	Motility
411gr-6	B7760_RS13395	VF0430	Flagella	Motility
411gr-6	B7760_RS13400	VF0430	Flagella	Motility
411gr-6	B7760_RS13405	VF0430	Flagella	Motility
411gr-6	B7760_RS13410	VF0430	Flagella	Motility
411gr-6	B7760_RS13415	VF0430	Flagella	Motility
411gr-6	B7760_RS13420	VF0430	Flagella	Motility
411gr-6	B7760_RS13425	VF0430	Flagella	Motility
411gr-6	B7760_RS14185	VF0430	Flagella	Motility
411gr-6	B7760_RS14190	VF0430	Flagella	Motility
411gr-6	B7760_RS14195	VF0430	Flagella	Motility
411gr-6	B7760_RS14200	VF0430	Flagella	Motility
411gr-6	B7760_RS14205	VF0430	Flagella	Motility
411gr-6	B7760_RS14210	VF0430	Flagella	Motility
411gr-6	B7760_RS14350				C5A845	reduced virulence
411gr-6	B7760_RS14355				C5A846	reduced virulence
411gr-6	B7760_RS14920				A0A0J9WXH4	increased virulence (hypervirulence)
411gr-6	B7760_RS14940	VF0430	Flagella	Motility
411gr-6	B7760_RS14975				C5A8V0	reduced virulence	flhD
411gr-6	B7760_RS14980						flhC
411gr-6	B7760_RS14985	VF0430	Flagella	Motility
411gr-6	B7760_RS15000	VF0430	Flagella	Motility
411gr-6	B7760_RS15005	VF0430	Flagella	Motility	P0A964	unaffected pathogenicity
411gr-6	B7760_RS15010	VF0430	Flagella	Motility
411gr-6	B7760_RS15015	VF0430	Flagella	Motility
411gr-6	B7760_RS15020	VF0430	Flagella	Motility
411gr-6	B7760_RS15025	VF0430	Flagella	Motility	P04042	reduced virulence
411gr-6	B7760_RS15030	VF0430	Flagella	Motility	P0A2D5	reduced virulence
411gr-6	B7760_RS15035	VF0430	Flagella	Motility
411gr-6	B7760_RS15055	VF0430	Flagella	Motility
411gr-6	B7760_RS15060	VF0430	Flagella	Motility
411gr-6	B7760_RS15070	VF0430	Flagella	Motility
411gr-6	B7760_RS15075	VF0430	Flagella	Motility
411gr-6	B7760_RS15180				C5A8Z0	reduced virulence
411gr-6	B7760_RS15285				B4E598	reduced virulence
411gr-6	B7760_RS15290				B4E599	reduced virulence
411gr-6	B7760_RS15295				B4E5A0	reduced virulence
411gr-6	B7760_RS15300				B4E5A1	reduced virulence
411gr-6	B7760_RS15305				B4E5A2	reduced virulence
411gr-6	B7760_RS15350	VF0460	EF-Tu	Adherence	W8TRT9	increased virulence (hypervirulence)
411gr-6	B7760_RS15425	VF0460	EF-Tu	Adherence	W8TRT9	increased virulence (hypervirulence)
411gr-6	B7760_RS15485				Q7VTC1	unaffected pathogenicity
411gr-6	B7760_RS15665				C5A9K4	reduced virulence
411gr-6	B7760_RS16090				C5AA67	effector (plant avirulence determinant)
411gr-6	B7760_RS16110				A0A5H2Q4P9	reduced virulence
411gr-6	B7760_RS16130				B4E6S3	unaffected pathogenicity
411gr-6	B7760_RS16345				Q63QH7	reduced virulence
411gr-6	B7760_RS16350				A0A1V2Y2U7	increased virulence (hypervirulence)
411gr-6	B7760_RS16355				A0A088UAI6	reduced virulence
411gr-6	B7760_RS16360				A0A088U4K2	reduced virulence
411gr-6	B7760_RS16545	VF0431	Type IV pili	Adherence
411gr-6	B7760_RS16555	VF0431	Type IV pili	Adherence
411gr-6	B7760_RS16755				Q63KC3	reduced virulence
411gr-6	B7760_RS17245				A0A076ZMY5	unaffected pathogenicity
411gr-6	B7760_RS17595						toxJ
411gr-6	B7760_RS17605						toxI
411gr-6	B7760_RS17610						toxH
411gr-6	B7760_RS17620						toxF
411gr-6	B7760_RS17630				Q9LBJ0	reduced virulence	toxA
411gr-6	B7760_RS17635						toxB
411gr-6	B7760_RS17640						toxC
411gr-6	B7760_RS17645						toxD
411gr-6	B7760_RS17650						toxE
411gr-6	B7760_RS18500						toxB
411gr-6	B7760_RS18550	VF0433	Quorum-sensing	Biofilm	Q4VSJ8	unaffected pathogenicity	tofI
411gr-6	B7760_RS18555				C5AIS7	reduced virulence
411gr-6	B7760_RS18560	VF0433	Quorum-sensing	Biofilm	Q4VSJ9	unaffected pathogenicity	tofR
411gr-6	B7760_RS19275	VF0430	Flagella	Motility
411gr-6	B7760_RS19500				B4EJI4	unaffected pathogenicity
411gr-6	B7760_RS19910				B4EIW7	increased virulence (hypervirulence)
411gr-6	B7760_RS20115	VF0569	T6SS	Effector delivery system	C5AHX3	effector (plant avirulence determinant)
411gr-6	B7760_RS20140	VF0569	T6SS	Effector delivery system	D4I234	reduced virulence
411gr-6	B7760_RS20565						toxI
411gr-6	B7760_RS21225	VF0430	Flagella	Motility
411gr-6	B7760_RS21470				B2SNH3	reduced virulence
411gr-6	B7760_RS21480				B2SNH4	reduced virulence
411gr-6	B7760_RS21795	VF0560	Capsule	Immune modulation
411gr-6	B7760_RS21825						toxJ
411gr-6	B7760_RS21915				C5AMW5	effector (plant avirulence determinant)
411gr-6	B7760_RS22160				A8YPP3	unaffected pathogenicity
411gr-6	B7760_RS22370				Q2T7Q1	reduced virulence
411gr-6	B7760_RS22375				Q2T7Q2	increased virulence (hypervirulence)
411gr-6	B7760_RS22515				Q0GYW2	reduced virulence
411gr-6	B7760_RS22525				Q0GYW4	reduced virulence
411gr-6	B7760_RS22730						toxF
411gr-6	B7760_RS23020				P19318	reduced virulence
411gr-6	B7760_RS24030	VF0159	Hsp60	Adherence
411gr-6	B7760_RS24210	VF0430	Flagella	Motility
411gr-6	B7760_RS24305	VF0430	Flagella	Motility
411gr-6	B7760_RS24315	VF0127	ACF	Others
411gr-6	B7760_RS24515				B4EJI4	unaffected pathogenicity
411gr-6	B7760_RS25090				A0A2J9HLA0	reduced virulence
411gr-6	B7760_RS25110				A0A2J9HL87	reduced virulence
411gr-6	B7760_RS25640				Q8ZR28	reduced virulence
411gr-6	B7760_RS26530						toxG
411gr-6	B7760_RS26535						toxH
411gr-6	B7760_RS26540						toxI
411gr-6	B7760_RS26610	VF0974	SCI (Salmonella centrisome island)	Effector delivery system	H9L4I8	reduced virulence
411gr-6	B7760_RS26615	VF0974	SCI (Salmonella centrisome island)	Effector delivery system	D4I0Q9	unaffected pathogenicity
411gr-6	B7760_RS26620				C5ALD1	effector (plant avirulence determinant)
411gr-6	B7760_RS26950	VF0569	T6SS	Effector delivery system	D4I234	reduced virulence
411gr-6	B7760_RS27700	VF0504	AdeFGH efflux pump	Biofilm
411gr-6	B7760_RS28510				Q8XDQ1	effector (plant avirulence determinant)
336gr-1	CG017_RS01150				Q8XWV5	loss of pathogenicity
336gr-1	CG017_RS01600				A0A0K0GLJ4	unaffected pathogenicity
336gr-1	CG017_RS01705				B4E9E8	increased virulence (hypervirulence)
336gr-1	CG017_RS01990						toxI
336gr-1	CG017_RS02150				C5ACT8	reduced virulence
336gr-1	CG017_RS02155	VF0431	Type IV pili	Adherence
336gr-1	CG017_RS02570				C5AD21	reduced virulence
336gr-1	CG017_RS02635				Q8Y282	loss of pathogenicity
336gr-1	CG017_RS03515				B4E974	increased virulence (hypervirulence)
336gr-1	CG017_RS03820	VF0430	Flagella	Motility
336gr-1	CG017_RS03825	VF0430	Flagella	Motility
336gr-1	CG017_RS03830	VF0430	Flagella	Motility
336gr-1	CG017_RS03835	VF0430	Flagella	Motility
336gr-1	CG017_RS03850	VF0430	Flagella	Motility
336gr-1	CG017_RS03855	VF0430	Flagella	Motility
336gr-1	CG017_RS03860	VF0430	Flagella	Motility
336gr-1	CG017_RS03985				B4E8H7	reduced virulence
336gr-1	CG017_RS04020	VF0430	Flagella	Motility
336gr-1	CG017_RS04025	VF0430	Flagella	Motility
336gr-1	CG017_RS04030	VF0430	Flagella	Motility
336gr-1	CG017_RS04035	VF0430	Flagella	Motility
336gr-1	CG017_RS04040	VF0430	Flagella	Motility
336gr-1	CG017_RS04045	VF0430	Flagella	Motility
336gr-1	CG017_RS04050	VF0430	Flagella	Motility
336gr-1	CG017_RS04055	VF0430	Flagella	Motility
336gr-1	CG017_RS04460				Q8Y0E7	reduced virulence
336gr-1	CG017_RS04815	VF0430	Flagella	Motility
336gr-1	CG017_RS04820	VF0430	Flagella	Motility
336gr-1	CG017_RS04825	VF0430	Flagella	Motility
336gr-1	CG017_RS04830	VF0430	Flagella	Motility
336gr-1	CG017_RS04835	VF0430	Flagella	Motility
336gr-1	CG017_RS04840	VF0430	Flagella	Motility
336gr-1	CG017_RS04975				C5A845	reduced virulence
336gr-1	CG017_RS04980				C5A846	reduced virulence
336gr-1	CG017_RS05320				A0A0J9WXH4	increased virulence (hypervirulence)
336gr-1	CG017_RS05340	VF0430	Flagella	Motility
336gr-1	CG017_RS05375				C5A8V0	reduced virulence	flhD
336gr-1	CG017_RS05380						flhC
336gr-1	CG017_RS05385	VF0430	Flagella	Motility
336gr-1	CG017_RS05390	VF0430	Flagella	Motility
336gr-1	CG017_RS05400	VF0430	Flagella	Motility
336gr-1	CG017_RS05405	VF0430	Flagella	Motility	P0A964	unaffected pathogenicity
336gr-1	CG017_RS05410	VF0430	Flagella	Motility
336gr-1	CG017_RS05415	VF0430	Flagella	Motility
336gr-1	CG017_RS05420	VF0430	Flagella	Motility
336gr-1	CG017_RS05425	VF0430	Flagella	Motility	P04042	reduced virulence
336gr-1	CG017_RS05430	VF0430	Flagella	Motility	P0A2D5	reduced virulence
336gr-1	CG017_RS05435	VF0430	Flagella	Motility
336gr-1	CG017_RS05455	VF0430	Flagella	Motility
336gr-1	CG017_RS05460	VF0430	Flagella	Motility
336gr-1	CG017_RS05470	VF0430	Flagella	Motility
336gr-1	CG017_RS05475	VF0430	Flagella	Motility
336gr-1	CG017_RS05580				C5A8Z0	reduced virulence
336gr-1	CG017_RS05680				B4E598	reduced virulence
336gr-1	CG017_RS05685				B4E599	reduced virulence
336gr-1	CG017_RS05690				B4E5A0	reduced virulence
336gr-1	CG017_RS05695				B4E5A1	reduced virulence
336gr-1	CG017_RS05700				B4E5A2	reduced virulence
336gr-1	CG017_RS05750	VF0460	EF-Tu	Adherence	W8TRT9	increased virulence (hypervirulence)
336gr-1	CG017_RS05830	VF0460	EF-Tu	Adherence	W8TRT9	increased virulence (hypervirulence)
336gr-1	CG017_RS05890				Q7VTC1	unaffected pathogenicity
336gr-1	CG017_RS06060				C5A9K2	effector (plant avirulence determinant)
336gr-1	CG017_RS06070				C5A9K4	reduced virulence
336gr-1	CG017_RS06640				C5AA67	effector (plant avirulence determinant)
336gr-1	CG017_RS06660				A0A5H2Q4P9	reduced virulence
336gr-1	CG017_RS06680				B4E6S3	unaffected pathogenicity
336gr-1	CG017_RS06895				Q63QH7	reduced virulence
336gr-1	CG017_RS06900				A0A1V2Y2U7	increased virulence (hypervirulence)
336gr-1	CG017_RS06905				A0A088UAI6	reduced virulence
336gr-1	CG017_RS06910				A0A088U4K2	reduced virulence
336gr-1	CG017_RS07085	VF0431	Type IV pili	Adherence
336gr-1	CG017_RS07095	VF0431	Type IV pili	Adherence
336gr-1	CG017_RS07790				Q8XW15	loss of pathogenicity
336gr-1	CG017_RS07925	VF0436	Capsule I	Immune modulation
336gr-1	CG017_RS07940	VF0436	Capsule I	Immune modulation
336gr-1	CG017_RS07995	VF0436	Capsule I	Immune modulation
336gr-1	CG017_RS08005	VF0436	Capsule I	Immune modulation
336gr-1	CG017_RS08010	VF0436	Capsule I	Immune modulation	Q63R85	reduced virulence
336gr-1	CG017_RS08015	VF0436	Capsule I	Immune modulation	Q9AI28	reduced virulence
336gr-1	CG017_RS08120				Q63RC4	unaffected pathogenicity
336gr-1	CG017_RS08135				B4ECX9	increased virulence (hypervirulence)
336gr-1	CG017_RS08250	VF0159	Hsp60	Adherence
336gr-1	CG017_RS08310				Q9HU22	reduced virulence
336gr-1	CG017_RS08420				A0A2J9HCW0	reduced virulence
336gr-1	CG017_RS08670						toxE
336gr-1	CG017_RS09205				Q75WC5	chemistry target: sensitivity to chemical
336gr-1	CG017_RS09230				C5ACN1	reduced virulence
336gr-1	CG017_RS09455				Q8ZPL7	reduced virulence
336gr-1	CG017_RS09620				Q8Y0J2	lethal
336gr-1	CG017_RS09940	VF0432	CdpA	Regulation	B4ED05	increased virulence (hypervirulence)
336gr-1	CG017_RS09970				A4KCQ2	reduced virulence	qsmR
336gr-1	CG017_RS10620				A0A069B091	reduced virulence
336gr-1	CG017_RS10865	VF0428	Bsa T3SS	Effector delivery system	A0A0H2WA86	effector (plant avirulence determinant)
336gr-1	CG017_RS10930						tofR
336gr-1	CG017_RS10940				Q8Y282	loss of pathogenicity
336gr-1	CG017_RS11530				Q2YJE8	reduced virulence
336gr-1	CG017_RS12235				C5AGX2	reduced virulence
336gr-1	CG017_RS13340	VF0433	Quorum-sensing	Biofilm
336gr-1	CG017_RS13600				C5AG42	reduced virulence
336gr-1	CG017_RS13970				A8YPP2	unaffected pathogenicity
336gr-1	CG017_RS14265				C5AFJ6	reduced virulence
336gr-1	CG017_RS14305				Q4UUL4	reduced virulence
336gr-1	CG017_RS14805				Q8PBY5	reduced virulence
336gr-1	CG017_RS14810				Q8PBY6	reduced virulence
336gr-1	CG017_RS14940				Q63T64	reduced virulence
336gr-1	CG017_RS15700				Q9I2U9	reduced virulence
336gr-1	CG017_RS15960				A0A0L9JQ40	reduced virulence
336gr-1	CG017_RS15975				B4EDS9	reduced virulence
336gr-1	CG017_RS16115				A0A088U1Z5	unaffected pathogenicity
336gr-1	CG017_RS16920	VF0569	T6SS	Effector delivery system	D4I234	reduced virulence
336gr-1	CG017_RS17265				C5ALD1	effector (plant avirulence determinant)
336gr-1	CG017_RS17270	VF0974	SCI (Salmonella centrisome island)	Effector delivery system	D4I0Q9	unaffected pathogenicity
336gr-1	CG017_RS17275	VF0974	SCI (Salmonella centrisome island)	Effector delivery system	H9L4I8	reduced virulence
336gr-1	CG017_RS17335						toxI
336gr-1	CG017_RS17340						toxH
336gr-1	CG017_RS17345						toxG
336gr-1	CG017_RS18225				Q8ZR28	reduced virulence
336gr-1	CG017_RS18755				A0A2J9HL87	reduced virulence
336gr-1	CG017_RS18775				A0A2J9HLA0	reduced virulence
336gr-1	CG017_RS19220				B4EJI4	unaffected pathogenicity
336gr-1	CG017_RS19425	VF0127	ACF	Others
336gr-1	CG017_RS19430	VF0430	Flagella	Motility
336gr-1	CG017_RS19525	VF0430	Flagella	Motility
336gr-1	CG017_RS19695	VF0159	Hsp60	Adherence
336gr-1	CG017_RS20700				P19318	reduced virulence
336gr-1	CG017_RS20990						toxF
336gr-1	CG017_RS21190				Q0GYW4	reduced virulence
336gr-1	CG017_RS21200				Q0GYW2	reduced virulence
336gr-1	CG017_RS21340				Q2T7Q2	increased virulence (hypervirulence)
336gr-1	CG017_RS21345				Q2T7Q1	reduced virulence
336gr-1	CG017_RS21655				A0A0S4VR07	reduced virulence
336gr-1	CG017_RS22145						toxB
336gr-1	CG017_RS22190	VF0433	Quorum-sensing	Biofilm	Q4VSJ8	unaffected pathogenicity	tofI
336gr-1	CG017_RS22195				C5AIS7	reduced virulence
336gr-1	CG017_RS22200	VF0433	Quorum-sensing	Biofilm	Q4VSJ9	unaffected pathogenicity	tofR
336gr-1	CG017_RS22950	VF0430	Flagella	Motility
336gr-1	CG017_RS23175				B4EJI4	unaffected pathogenicity
336gr-1	CG017_RS23575				B4EIW7	increased virulence (hypervirulence)
336gr-1	CG017_RS23870	VF0569	T6SS	Effector delivery system	C5AHX3	effector (plant avirulence determinant)
336gr-1	CG017_RS23895	VF0569	T6SS	Effector delivery system	D4I234	reduced virulence
336gr-1	CG017_RS24300						toxI
336gr-1	CG017_RS24950	VF0430	Flagella	Motility
336gr-1	CG017_RS25530				B2SNH3	reduced virulence
336gr-1	CG017_RS25540				B2SNH4	reduced virulence
336gr-1	CG017_RS25840	VF0560	Capsule	Immune modulation
336gr-1	CG017_RS25870						toxJ
336gr-1	CG017_RS25960				C5AMW5	effector (plant avirulence determinant)
336gr-1	CG017_RS26210				A8YPP3	unaffected pathogenicity
336gr-1	CG017_RS26505						toxE
336gr-1	CG017_RS26510						toxD
336gr-1	CG017_RS26515						toxC
336gr-1	CG017_RS26520						toxB
336gr-1	CG017_RS26525				Q9LBJ0	reduced virulence	toxA
336gr-1	CG017_RS26535						toxF
336gr-1	CG017_RS26540						toxG
336gr-1	CG017_RS26545						toxH
336gr-1	CG017_RS26550						toxI
336gr-1	CG017_RS26560						toxJ
336gr-1	CG017_RS26945				A0A076ZMY5	unaffected pathogenicity
336gr-1	CG017_RS28035	VF0504	AdeFGH efflux pump	Biofilm
336gr-1	CG017_RS28945				Q8XDQ1	effector (plant avirulence determinant)
HN2	GAS18_RS00475				Q2YJE8	reduced virulence
HN2	GAS18_RS01135				C5AGX2	reduced virulence
HN2	GAS18_RS02235				C5AG42	reduced virulence
HN2	GAS18_RS02575				A8YPP2	unaffected pathogenicity
HN2	GAS18_RS02880				C5AFJ6	reduced virulence
HN2	GAS18_RS02920				Q4UUL4	reduced virulence
HN2	GAS18_RS03430				Q8PBY5	reduced virulence
HN2	GAS18_RS03435				Q8PBY6	reduced virulence
HN2	GAS18_RS03570				Q63T64	reduced virulence
HN2	GAS18_RS04300				A0A069B091	reduced virulence
HN2	GAS18_RS04945				A4KCQ2	reduced virulence	qsmR
HN2	GAS18_RS04975	VF0432	CdpA	Regulation	B4ED05	increased virulence (hypervirulence)
HN2	GAS18_RS05295				Q8Y0J2	lethal
HN2	GAS18_RS05460				Q8ZPL7	reduced virulence
HN2	GAS18_RS05685				C5ACN1	reduced virulence
HN2	GAS18_RS05710				Q75WC5	chemistry target: sensitivity to chemical
HN2	GAS18_RS06110						toxE
HN2	GAS18_RS06320				A0A2J9HCW0	reduced virulence
HN2	GAS18_RS06460				Q9HU22	reduced virulence
HN2	GAS18_RS06520	VF0159	Hsp60	Adherence
HN2	GAS18_RS06635				B4ECX9	increased virulence (hypervirulence)
HN2	GAS18_RS06650				Q63RC4	unaffected pathogenicity
HN2	GAS18_RS06755	VF0436	Capsule I	Immune modulation	Q9AI28	reduced virulence
HN2	GAS18_RS06760	VF0436	Capsule I	Immune modulation	Q63R85	reduced virulence
HN2	GAS18_RS06765	VF0436	Capsule I	Immune modulation
HN2	GAS18_RS06775	VF0436	Capsule I	Immune modulation
HN2	GAS18_RS06845	VF0436	Capsule I	Immune modulation
HN2	GAS18_RS06980				Q8XW15	loss of pathogenicity
HN2	GAS18_RS07675	VF0431	Type IV pili	Adherence
HN2	GAS18_RS07685	VF0431	Type IV pili	Adherence
HN2	GAS18_RS07865				A0A088U4K2	reduced virulence
HN2	GAS18_RS07870				A0A088UAI6	reduced virulence
HN2	GAS18_RS07875				A0A1V2Y2U7	increased virulence (hypervirulence)
HN2	GAS18_RS07880				Q63QH7	reduced virulence
HN2	GAS18_RS08345				B4E6S3	unaffected pathogenicity
HN2	GAS18_RS08365				A0A5H2Q4P9	reduced virulence
HN2	GAS18_RS08385				C5AA67	effector (plant avirulence determinant)
HN2	GAS18_RS08725				C5A9K4	reduced virulence
HN2	GAS18_RS08735				C5A9K2	effector (plant avirulence determinant)
HN2	GAS18_RS08905				Q7VTC1	unaffected pathogenicity
HN2	GAS18_RS08965	VF0460	EF-Tu	Adherence	W8TRT9	increased virulence (hypervirulence)
HN2	GAS18_RS09090				B4E5A2	reduced virulence
HN2	GAS18_RS09095				B4E5A1	reduced virulence
HN2	GAS18_RS09100				B4E5A0	reduced virulence
HN2	GAS18_RS09105				B4E599	reduced virulence
HN2	GAS18_RS09110				B4E598	reduced virulence
HN2	GAS18_RS09210				C5A8Z0	reduced virulence
HN2	GAS18_RS09315	VF0430	Flagella	Motility
HN2	GAS18_RS09320	VF0430	Flagella	Motility
HN2	GAS18_RS09330	VF0430	Flagella	Motility
HN2	GAS18_RS09335	VF0430	Flagella	Motility
HN2	GAS18_RS09355	VF0430	Flagella	Motility
HN2	GAS18_RS09360	VF0430	Flagella	Motility	P0A2D5	reduced virulence
HN2	GAS18_RS09365	VF0430	Flagella	Motility	P04042	reduced virulence
HN2	GAS18_RS09370	VF0430	Flagella	Motility
HN2	GAS18_RS09375	VF0430	Flagella	Motility
HN2	GAS18_RS09380	VF0430	Flagella	Motility
HN2	GAS18_RS09385	VF0430	Flagella	Motility	P0A964	unaffected pathogenicity
HN2	GAS18_RS09390	VF0430	Flagella	Motility
HN2	GAS18_RS09400	VF0430	Flagella	Motility
HN2	GAS18_RS09405	VF0430	Flagella	Motility
HN2	GAS18_RS09410						flhC
HN2	GAS18_RS09415				C5A8V0	reduced virulence	flhD
HN2	GAS18_RS09450	VF0430	Flagella	Motility
HN2	GAS18_RS09470				A0A0J9WXH4	increased virulence (hypervirulence)
HN2	GAS18_RS09815				C5A846	reduced virulence
HN2	GAS18_RS09820				C5A845	reduced virulence
HN2	GAS18_RS09960	VF0430	Flagella	Motility
HN2	GAS18_RS09965	VF0430	Flagella	Motility
HN2	GAS18_RS09970	VF0430	Flagella	Motility
HN2	GAS18_RS09975	VF0430	Flagella	Motility
HN2	GAS18_RS09980	VF0430	Flagella	Motility
HN2	GAS18_RS09985	VF0430	Flagella	Motility
HN2	GAS18_RS10270				Q8Y0E7	reduced virulence
HN2	GAS18_RS10685	VF0430	Flagella	Motility
HN2	GAS18_RS10690	VF0430	Flagella	Motility
HN2	GAS18_RS10695	VF0430	Flagella	Motility
HN2	GAS18_RS10700	VF0430	Flagella	Motility
HN2	GAS18_RS10705	VF0430	Flagella	Motility
HN2	GAS18_RS10710	VF0430	Flagella	Motility
HN2	GAS18_RS10715	VF0430	Flagella	Motility
HN2	GAS18_RS10720	VF0430	Flagella	Motility
HN2	GAS18_RS10755				B4E8H7	reduced virulence
HN2	GAS18_RS10880	VF0430	Flagella	Motility
HN2	GAS18_RS10885	VF0430	Flagella	Motility
HN2	GAS18_RS10890	VF0430	Flagella	Motility
HN2	GAS18_RS10905	VF0430	Flagella	Motility
HN2	GAS18_RS10910	VF0430	Flagella	Motility
HN2	GAS18_RS10915	VF0430	Flagella	Motility
HN2	GAS18_RS10920	VF0430	Flagella	Motility
HN2	GAS18_RS11225				B4E974	increased virulence (hypervirulence)
HN2	GAS18_RS12315				C5AD21	reduced virulence
HN2	GAS18_RS12735	VF0431	Type IV pili	Adherence
HN2	GAS18_RS12740				C5ACT8	reduced virulence
HN2	GAS18_RS12900						toxI
HN2	GAS18_RS13185				B4E9E8	increased virulence (hypervirulence)
HN2	GAS18_RS13290				A0A0K0GLJ4	unaffected pathogenicity
HN2	GAS18_RS13670				Q8XWV5	loss of pathogenicity
HN2	GAS18_RS15090				A0A088U1Z5	unaffected pathogenicity
HN2	GAS18_RS15225				B4EDS9	reduced virulence
HN2	GAS18_RS15240				A0A0L9JQ40	reduced virulence
HN2	GAS18_RS15625				Q9I2U9	reduced virulence
HN2	GAS18_RS15890						tofR
HN2	GAS18_RS16160	VF0569	T6SS	Effector delivery system	C5AHX3	effector (plant avirulence determinant)
HN2	GAS18_RS16380				B4EIW7	increased virulence (hypervirulence)
HN2	GAS18_RS16745				B4EJI4	unaffected pathogenicity
HN2	GAS18_RS16965	VF0430	Flagella	Motility
HN2	GAS18_RS17730	VF0433	Quorum-sensing	Biofilm	Q4VSJ9	unaffected pathogenicity	tofR
HN2	GAS18_RS17735				C5AIS7	reduced virulence
HN2	GAS18_RS17740	VF0433	Quorum-sensing	Biofilm	Q4VSJ8	unaffected pathogenicity	tofI
HN2	GAS18_RS17840						toxB
HN2	GAS18_RS18330				A0A0S4VR07	reduced virulence
HN2	GAS18_RS18660						toxE
HN2	GAS18_RS18665						toxD
HN2	GAS18_RS18670						toxC
HN2	GAS18_RS18675						toxB
HN2	GAS18_RS18680				Q9LBJ0	reduced virulence	toxA
HN2	GAS18_RS18690						toxF
HN2	GAS18_RS18695						toxG
HN2	GAS18_RS18700						toxH
HN2	GAS18_RS18715						toxJ
HN2	GAS18_RS18995				A0A076ZMY5	unaffected pathogenicity
HN2	GAS18_RS19485				Q63KC3	reduced virulence
HN2	GAS18_RS20075	VF0504	AdeFGH efflux pump	Biofilm
HN2	GAS18_RS21025				C5ALD1	effector (plant avirulence determinant)
HN2	GAS18_RS21030	VF0974	SCI (Salmonella centrisome island)	Effector delivery system	D4I0Q9	unaffected pathogenicity
HN2	GAS18_RS21035	VF0974	SCI (Salmonella centrisome island)	Effector delivery system	H9L4I8	reduced virulence
HN2	GAS18_RS21095						toxI
HN2	GAS18_RS21100						toxH
HN2	GAS18_RS21105						toxG
HN2	GAS18_RS21985				Q8ZR28	reduced virulence
HN2	GAS18_RS22335				A0A2J9HL87	reduced virulence
HN2	GAS18_RS22355				A0A2J9HLA0	reduced virulence
HN2	GAS18_RS22860				B4EJI4	unaffected pathogenicity
HN2	GAS18_RS23070	VF0127	ACF	Others
HN2	GAS18_RS23075	VF0430	Flagella	Motility
HN2	GAS18_RS23175	VF0430	Flagella	Motility
HN2	GAS18_RS23355	VF0159	Hsp60	Adherence
HN2	GAS18_RS24385				P19318	reduced virulence
HN2	GAS18_RS24670						toxF
HN2	GAS18_RS24870				Q0GYW4	reduced virulence
HN2	GAS18_RS24880				Q0GYW2	reduced virulence
HN2	GAS18_RS25020				Q2T7Q2	increased virulence (hypervirulence)
HN2	GAS18_RS25025				Q2T7Q1	reduced virulence
HN2	GAS18_RS25240				A8YPP3	unaffected pathogenicity
HN2	GAS18_RS25670				C5AMW5	effector (plant avirulence determinant)
HN2	GAS18_RS25760						toxJ
HN2	GAS18_RS25790	VF0560	Capsule	Immune modulation
HN2	GAS18_RS26110				B2SNH4	reduced virulence
HN2	GAS18_RS26120				B2SNH3	reduced virulence
HN2	GAS18_RS26410	VF0430	Flagella	Motility
HN2	GAS18_RS26995						toxI
HN2	GAS18_RS27550						tofR
BGR1	BGLU_RS00070	VF0430	Flagella	Motility
BGR1	BGLU_RS00075	VF0430	Flagella	Motility
BGR1	BGLU_RS00080	VF0430	Flagella	Motility
BGR1	BGLU_RS00085	VF0430	Flagella	Motility
BGR1	BGLU_RS00090	VF0430	Flagella	Motility
BGR1	BGLU_RS00095	VF0430	Flagella	Motility
BGR1	BGLU_RS00230				C5A845	reduced virulence
BGR1	BGLU_RS00235				C5A846	reduced virulence
BGR1	BGLU_RS00785				A0A0J9WXH4	increased virulence (hypervirulence)
BGR1	BGLU_RS00805	VF0430	Flagella	Motility
BGR1	BGLU_RS00840				C5A8V0	reduced virulence	flhD
BGR1	BGLU_RS00845						flhC
BGR1	BGLU_RS00850	VF0430	Flagella	Motility
BGR1	BGLU_RS00855	VF0430	Flagella	Motility
BGR1	BGLU_RS00865	VF0430	Flagella	Motility
BGR1	BGLU_RS00870	VF0430	Flagella	Motility	P0A964	unaffected pathogenicity
BGR1	BGLU_RS00875	VF0430	Flagella	Motility
BGR1	BGLU_RS00880	VF0430	Flagella	Motility
BGR1	BGLU_RS00885	VF0430	Flagella	Motility
BGR1	BGLU_RS00890	VF0430	Flagella	Motility	P04042	reduced virulence
BGR1	BGLU_RS00895	VF0430	Flagella	Motility	P0A2D5	reduced virulence
BGR1	BGLU_RS00900	VF0430	Flagella	Motility
BGR1	BGLU_RS00920	VF0430	Flagella	Motility
BGR1	BGLU_RS00925	VF0430	Flagella	Motility
BGR1	BGLU_RS00935	VF0430	Flagella	Motility
BGR1	BGLU_RS00940	VF0430	Flagella	Motility
BGR1	BGLU_RS01045				C5A8Z0	reduced virulence
BGR1	BGLU_RS01145				B4E598	reduced virulence
BGR1	BGLU_RS01150				B4E599	reduced virulence
BGR1	BGLU_RS01155				B4E5A0	reduced virulence
BGR1	BGLU_RS01160				B4E5A1	reduced virulence
BGR1	BGLU_RS01165				B4E5A2	reduced virulence
BGR1	BGLU_RS01215	VF0460	EF-Tu	Adherence	W8TRT9	increased virulence (hypervirulence)
BGR1	BGLU_RS01290	VF0460	EF-Tu	Adherence	W8TRT9	increased virulence (hypervirulence)
BGR1	BGLU_RS01350				Q7VTC1	unaffected pathogenicity
BGR1	BGLU_RS01520				C5A9K2	effector (plant avirulence determinant)
BGR1	BGLU_RS01530				C5A9K4	reduced virulence
BGR1	BGLU_RS01955				C5AA67	effector (plant avirulence determinant)
BGR1	BGLU_RS01975				A0A5H2Q4P9	reduced virulence
BGR1	BGLU_RS01995				B4E6S3	unaffected pathogenicity
BGR1	BGLU_RS02215				Q63QH7	reduced virulence
BGR1	BGLU_RS02220				A0A1V2Y2U7	increased virulence (hypervirulence)
BGR1	BGLU_RS02225				A0A088UAI6	reduced virulence
BGR1	BGLU_RS02230				A0A088U4K2	reduced virulence
BGR1	BGLU_RS02405	VF0431	Type IV pili	Adherence
BGR1	BGLU_RS02415	VF0431	Type IV pili	Adherence
BGR1	BGLU_RS03105				Q8XW15	loss of pathogenicity
BGR1	BGLU_RS03240	VF0436	Capsule I	Immune modulation
BGR1	BGLU_RS03255	VF0436	Capsule I	Immune modulation
BGR1	BGLU_RS03310	VF0436	Capsule I	Immune modulation
BGR1	BGLU_RS03320	VF0436	Capsule I	Immune modulation
BGR1	BGLU_RS03325	VF0436	Capsule I	Immune modulation	Q63R85	reduced virulence
BGR1	BGLU_RS03330	VF0436	Capsule I	Immune modulation	Q9AI28	reduced virulence
BGR1	BGLU_RS03435				Q63RC4	unaffected pathogenicity
BGR1	BGLU_RS03450				B4ECX9	increased virulence (hypervirulence)
BGR1	BGLU_RS03570	VF0159	Hsp60	Adherence
BGR1	BGLU_RS03630				Q9HU22	reduced virulence
BGR1	BGLU_RS03740				A0A2J9HCW0	reduced virulence
BGR1	BGLU_RS03970						toxE
BGR1	BGLU_RS04355				Q75WC5	chemistry target: sensitivity to chemical
BGR1	BGLU_RS04380				C5ACN1	reduced virulence
BGR1	BGLU_RS04595				Q8ZPL7	reduced virulence
BGR1	BGLU_RS04750				Q8Y0J2	lethal
BGR1	BGLU_RS05070	VF0432	CdpA	Regulation	B4ED05	increased virulence (hypervirulence)
BGR1	BGLU_RS05100				A4KCQ2	reduced virulence	qsmR
BGR1	BGLU_RS05755				A0A069B091	reduced virulence
BGR1	BGLU_RS06615				Q63T64	reduced virulence
BGR1	BGLU_RS06740				Q8PBY6	reduced virulence
BGR1	BGLU_RS06745				Q8PBY5	reduced virulence
BGR1	BGLU_RS07245				Q4UUL4	reduced virulence
BGR1	BGLU_RS07285				C5AFJ6	reduced virulence
BGR1	BGLU_RS07580				A8YPP2	unaffected pathogenicity
BGR1	BGLU_RS08345				C5AG42	reduced virulence
BGR1	BGLU_RS08590	VF0433	Quorum-sensing	Biofilm
BGR1	BGLU_RS09850				C5AGX2	reduced virulence
BGR1	BGLU_RS11245				Q2YJE8	reduced virulence
BGR1	BGLU_RS11750				Q8Y282	loss of pathogenicity
BGR1	BGLU_RS11760						tofR
BGR1	BGLU_RS11990				Q9I2U9	reduced virulence
BGR1	BGLU_RS13020				A0A0L9JQ40	reduced virulence
BGR1	BGLU_RS13035				B4EDS9	reduced virulence
BGR1	BGLU_RS13175				A0A088U1Z5	unaffected pathogenicity
BGR1	BGLU_RS14170				B4E6H5	reduced virulence
BGR1	BGLU_RS14715				Q8XWV5	loss of pathogenicity
BGR1	BGLU_RS15135				A0A0K0GLJ4	unaffected pathogenicity
BGR1	BGLU_RS15230				B4E9E8	increased virulence (hypervirulence)
BGR1	BGLU_RS15520						toxI
BGR1	BGLU_RS15675				C5ACT8	reduced virulence
BGR1	BGLU_RS15680	VF0431	Type IV pili	Adherence
BGR1	BGLU_RS16090				C5AD21	reduced virulence
BGR1	BGLU_RS16155				Q8Y282	loss of pathogenicity
BGR1	BGLU_RS17000				B4E974	increased virulence (hypervirulence)
BGR1	BGLU_RS17295	VF0430	Flagella	Motility
BGR1	BGLU_RS17300	VF0430	Flagella	Motility
BGR1	BGLU_RS17305	VF0430	Flagella	Motility
BGR1	BGLU_RS17310	VF0430	Flagella	Motility
BGR1	BGLU_RS17325	VF0430	Flagella	Motility
BGR1	BGLU_RS17330	VF0430	Flagella	Motility
BGR1	BGLU_RS17335	VF0430	Flagella	Motility
BGR1	BGLU_RS17460				B4E8H7	reduced virulence
BGR1	BGLU_RS17495	VF0430	Flagella	Motility
BGR1	BGLU_RS17500	VF0430	Flagella	Motility
BGR1	BGLU_RS17505	VF0430	Flagella	Motility
BGR1	BGLU_RS17510	VF0430	Flagella	Motility
BGR1	BGLU_RS17515	VF0430	Flagella	Motility
BGR1	BGLU_RS17520	VF0430	Flagella	Motility
BGR1	BGLU_RS17525	VF0430	Flagella	Motility
BGR1	BGLU_RS17530	VF0430	Flagella	Motility
BGR1	BGLU_RS18575						toxG
BGR1	BGLU_RS18580						toxH
BGR1	BGLU_RS18585						toxI
BGR1	BGLU_RS18650	VF0974	SCI (Salmonella centrisome island)	Effector delivery system	H9L4I8	reduced virulence
BGR1	BGLU_RS18655	VF0974	SCI (Salmonella centrisome island)	Effector delivery system	D4I0Q9	unaffected pathogenicity
BGR1	BGLU_RS18660				C5ALD1	effector (plant avirulence determinant)
BGR1	BGLU_RS18950	VF0569	T6SS	Effector delivery system	D4I234	reduced virulence
BGR1	BGLU_RS19645	VF0504	AdeFGH efflux pump	Biofilm
BGR1	BGLU_RS32700				Q63KC3	reduced virulence
BGR1	BGLU_RS20685				A0A076ZMY5	unaffected pathogenicity
BGR1	BGLU_RS21020						toxJ
BGR1	BGLU_RS21030						toxI
BGR1	BGLU_RS21035						toxH
BGR1	BGLU_RS21040						toxG
BGR1	BGLU_RS21045						toxF
BGR1	BGLU_RS21055				Q9LBJ0	reduced virulence
BGR1	BGLU_RS21060						toxB
BGR1	BGLU_RS21065						toxC
BGR1	BGLU_RS21070						toxD
BGR1	BGLU_RS21075						toxE
BGR1	BGLU_RS21305				A8YPP3	unaffected pathogenicity
BGR1	BGLU_RS21545				C5AMW5	effector (plant avirulence determinant)
BGR1	BGLU_RS21625						toxJ
BGR1	BGLU_RS21655	VF0560	Capsule	Immune modulation
BGR1	BGLU_RS21960				B2SNH4	reduced virulence
BGR1	BGLU_RS21970				B2SNH3	reduced virulence
BGR1	BGLU_RS22225	VF0430	Flagella	Motility
BGR1	BGLU_RS22870						toxI
BGR1	BGLU_RS23260	VF0569	T6SS	Effector delivery system	D4I234	reduced virulence
BGR1	BGLU_RS23285	VF0569	T6SS	Effector delivery system	C5AHX3	effector (plant avirulence determinant)
BGR1	BGLU_RS23580				B4EIW7	increased virulence (hypervirulence)
BGR1	BGLU_RS23955				B4EJI4	unaffected pathogenicity
BGR1	BGLU_RS24175	VF0430	Flagella	Motility
BGR1	BGLU_RS24855	VF0433	Quorum-sensing	Biofilm	Q4VSJ9	unaffected pathogenicity	tofR
BGR1	BGLU_RS24860				C5AIS7	reduced virulence
BGR1	BGLU_RS24865	VF0433	Quorum-sensing	Biofilm	Q4VSJ8	unaffected pathogenicity	tofI
BGR1	BGLU_RS24905						toxB
BGR1	BGLU_RS25380				A0A0S4VR07	reduced virulence
BGR1	BGLU_RS25645				Q2T7Q1	reduced virulence
BGR1	BGLU_RS25650				Q2T7Q2	increased virulence (hypervirulence)
BGR1	BGLU_RS25790				Q0GYW2	reduced virulence
BGR1	BGLU_RS25800				Q0GYW4	reduced virulence
BGR1	BGLU_RS26005						toxF
BGR1	BGLU_RS26295				P19318	reduced virulence
BGR1	BGLU_RS27285	VF0159	Hsp60	Adherence
BGR1	BGLU_RS27445	VF0430	Flagella	Motility
BGR1	BGLU_RS27540	VF0430	Flagella	Motility
BGR1	BGLU_RS27745				B4EJI4	unaffected pathogenicity
BGR1	BGLU_RS28225				A0A2J9HLA0	reduced virulence
BGR1	BGLU_RS28245				A0A2J9HL87	reduced virulence
BGR1	BGLU_RS28725				Q8ZR28	reduced virulence
BGR1	BGLU_RS29695				Q8XDQ1	effector (plant avirulence determinant)
BGR1	BGLU_RS33515						tofR
AU6208	GQR88_RS00540				C5AG42	reduced virulence
AU6208	GQR88_RS01660				C5AGX2	reduced virulence
AU6208	GQR88_RS02320				Q2YJE8	reduced virulence
AU6208	GQR88_RS02875						tofR
AU6208	GQR88_RS03295				A0A069B091	reduced virulence
AU6208	GQR88_RS03985				A4KCQ2	reduced virulence	qsmR
AU6208	GQR88_RS04015	VF0432	CdpA	Regulation	B4ED05	increased virulence (hypervirulence)
AU6208	GQR88_RS04350				Q8Y0J2	lethal
AU6208	GQR88_RS04515				Q8ZPL7	reduced virulence
AU6208	GQR88_RS04730				C5ACN1	reduced virulence
AU6208	GQR88_RS04755				Q75WC5	chemistry target: sensitivity to chemical
AU6208	GQR88_RS05235						toxE
AU6208	GQR88_RS05440				A0A2J9HCW0	reduced virulence
AU6208	GQR88_RS05550				Q9HU22	reduced virulence
AU6208	GQR88_RS05610	VF0159	Hsp60	Adherence
AU6208	GQR88_RS05725				B4ECX9	increased virulence (hypervirulence)
AU6208	GQR88_RS05740				Q63RC4	unaffected pathogenicity
AU6208	GQR88_RS05845	VF0436	Capsule I	Immune modulation	Q9AI28	reduced virulence
AU6208	GQR88_RS05850	VF0436	Capsule I	Immune modulation	Q63R85	reduced virulence
AU6208	GQR88_RS05855	VF0436	Capsule I	Immune modulation
AU6208	GQR88_RS05865	VF0436	Capsule I	Immune modulation
AU6208	GQR88_RS05920	VF0436	Capsule I	Immune modulation
AU6208	GQR88_RS05935	VF0436	Capsule I	Immune modulation
AU6208	GQR88_RS06065				Q8XW15	loss of pathogenicity
AU6208	GQR88_RS06755	VF0431	Type IV pili	Adherence
AU6208	GQR88_RS06765	VF0431	Type IV pili	Adherence
AU6208	GQR88_RS06945				A0A088U4K2	reduced virulence
AU6208	GQR88_RS06950				A0A088UAI6	reduced virulence
AU6208	GQR88_RS06955				A0A1V2Y2U7	increased virulence (hypervirulence)
AU6208	GQR88_RS06960				Q63QH7	reduced virulence
AU6208	GQR88_RS07180				B4E6S3	unaffected pathogenicity
AU6208	GQR88_RS07200				A0A5H2Q4P9	reduced virulence
AU6208	GQR88_RS07220				C5AA67	effector (plant avirulence determinant)
AU6208	GQR88_RS07665				C5A9K4	reduced virulence
AU6208	GQR88_RS07675				C5A9K2	effector (plant avirulence determinant)
AU6208	GQR88_RS07845				Q7VTC1	unaffected pathogenicity
AU6208	GQR88_RS07905	VF0460	EF-Tu	Adherence	W8TRT9	increased virulence (hypervirulence)
AU6208	GQR88_RS08040				B4E5A2	reduced virulence
AU6208	GQR88_RS08045				B4E5A1	reduced virulence
AU6208	GQR88_RS08050				B4E5A0	reduced virulence
AU6208	GQR88_RS08055				B4E599	reduced virulence
AU6208	GQR88_RS08060				B4E598	reduced virulence
AU6208	GQR88_RS08160				C5A8Z0	reduced virulence
AU6208	GQR88_RS08265	VF0430	Flagella	Motility
AU6208	GQR88_RS08270	VF0430	Flagella	Motility
AU6208	GQR88_RS08280	VF0430	Flagella	Motility
AU6208	GQR88_RS08285	VF0430	Flagella	Motility
AU6208	GQR88_RS08305	VF0430	Flagella	Motility
AU6208	GQR88_RS08310	VF0430	Flagella	Motility	P0A2D5	reduced virulence
AU6208	GQR88_RS08315	VF0430	Flagella	Motility	P04042	reduced virulence
AU6208	GQR88_RS08320	VF0430	Flagella	Motility
AU6208	GQR88_RS08325	VF0430	Flagella	Motility
AU6208	GQR88_RS08330	VF0430	Flagella	Motility
AU6208	GQR88_RS08335	VF0430	Flagella	Motility	P0A964	unaffected pathogenicity
AU6208	GQR88_RS08340	VF0430	Flagella	Motility
AU6208	GQR88_RS08350	VF0430	Flagella	Motility
AU6208	GQR88_RS08355	VF0430	Flagella	Motility
AU6208	GQR88_RS08360						flhC
AU6208	GQR88_RS08365				C5A8V0	reduced virulence	flhD
AU6208	GQR88_RS08400	VF0430	Flagella	Motility
AU6208	GQR88_RS08420				A0A0J9WXH4	increased virulence (hypervirulence)
AU6208	GQR88_RS08765				C5A846	reduced virulence
AU6208	GQR88_RS08770				C5A845	reduced virulence
AU6208	GQR88_RS08910	VF0430	Flagella	Motility
AU6208	GQR88_RS08915	VF0430	Flagella	Motility
AU6208	GQR88_RS08920	VF0430	Flagella	Motility
AU6208	GQR88_RS08925	VF0430	Flagella	Motility
AU6208	GQR88_RS08930	VF0430	Flagella	Motility
AU6208	GQR88_RS08935	VF0430	Flagella	Motility
AU6208	GQR88_RS09875	VF0430	Flagella	Motility
AU6208	GQR88_RS09880	VF0430	Flagella	Motility
AU6208	GQR88_RS09885	VF0430	Flagella	Motility
AU6208	GQR88_RS09890	VF0430	Flagella	Motility
AU6208	GQR88_RS09895	VF0430	Flagella	Motility
AU6208	GQR88_RS09900	VF0430	Flagella	Motility
AU6208	GQR88_RS09905	VF0430	Flagella	Motility
AU6208	GQR88_RS09910	VF0430	Flagella	Motility
AU6208	GQR88_RS09945				B4E8H7	reduced virulence
AU6208	GQR88_RS10070	VF0430	Flagella	Motility
AU6208	GQR88_RS10075	VF0430	Flagella	Motility
AU6208	GQR88_RS10080	VF0430	Flagella	Motility
AU6208	GQR88_RS10095	VF0430	Flagella	Motility
AU6208	GQR88_RS10100	VF0430	Flagella	Motility
AU6208	GQR88_RS10105	VF0430	Flagella	Motility
AU6208	GQR88_RS10110	VF0430	Flagella	Motility
AU6208	GQR88_RS10410				B4E974	increased virulence (hypervirulence)
AU6208	GQR88_RS11330				C5AD21	reduced virulence
AU6208	GQR88_RS11835	VF0431	Type IV pili	Adherence
AU6208	GQR88_RS11840				C5ACT8	reduced virulence
AU6208	GQR88_RS12000						toxI
AU6208	GQR88_RS12285				B4E9E8	increased virulence (hypervirulence)
AU6208	GQR88_RS12390				A0A0K0GLJ4	unaffected pathogenicity
AU6208	GQR88_RS12770				Q8XWV5	loss of pathogenicity
AU6208	GQR88_RS13150				B4E6H5	reduced virulence
AU6208	GQR88_RS14185				A0A088U1Z5	unaffected pathogenicity
AU6208	GQR88_RS14320				B4EDS9	reduced virulence
AU6208	GQR88_RS14335				A0A0L9JQ40	reduced virulence
AU6208	GQR88_RS14725				Q9I2U9	reduced virulence
AU6208	GQR88_RS15335				Q63T64	reduced virulence
AU6208	GQR88_RS15465				Q8PBY6	reduced virulence
AU6208	GQR88_RS15470				Q8PBY5	reduced virulence
AU6208	GQR88_RS15985				Q4UUL4	reduced virulence
AU6208	GQR88_RS16025				C5AFJ6	reduced virulence
AU6208	GQR88_RS16325				A8YPP2	unaffected pathogenicity
AU6208	GQR88_RS17480						toxG
AU6208	GQR88_RS17485						toxH
AU6208	GQR88_RS17490						toxI
AU6208	GQR88_RS17550	VF0974	SCI (Salmonella centrisome island)	Effector delivery system	H9L4I8	reduced virulence
AU6208	GQR88_RS17555	VF0974	SCI (Salmonella centrisome island)	Effector delivery system	D4I0Q9	unaffected pathogenicity
AU6208	GQR88_RS17560				C5ALD1	effector (plant avirulence determinant)
AU6208	GQR88_RS18605	VF0504	AdeFGH efflux pump	Biofilm
AU6208	GQR88_RS29460				Q63KC3	reduced virulence
AU6208	GQR88_RS19665				A0A076ZMY5	unaffected pathogenicity
AU6208	GQR88_RS19960						toxJ
AU6208	GQR88_RS19970						toxI
AU6208	GQR88_RS19975						toxH
AU6208	GQR88_RS19980						toxG
AU6208	GQR88_RS19985						toxF
AU6208	GQR88_RS19995				Q9LBJ0	reduced virulence
AU6208	GQR88_RS20000						toxB
AU6208	GQR88_RS20005						toxC
AU6208	GQR88_RS20010						toxD
AU6208	GQR88_RS20015						toxE
AU6208	GQR88_RS20350				A0A0S4VR07	reduced virulence
AU6208	GQR88_RS20840						toxB
AU6208	GQR88_RS20950	VF0433	Quorum-sensing	Biofilm	Q4VSJ8	unaffected pathogenicity	tofI
AU6208	GQR88_RS20955				C5AIS7	reduced virulence
AU6208	GQR88_RS20960	VF0433	Quorum-sensing	Biofilm	Q4VSJ9	unaffected pathogenicity	tofR
AU6208	GQR88_RS21675	VF0430	Flagella	Motility
AU6208	GQR88_RS21910				B4EJI4	unaffected pathogenicity
AU6208	GQR88_RS22310				B4EIW7	increased virulence (hypervirulence)
AU6208	GQR88_RS22515	VF0569	T6SS	Effector delivery system	C5AHX3	effector (plant avirulence determinant)
AU6208	GQR88_RS22540	VF0569	T6SS	Effector delivery system	D4I234	reduced virulence
AU6208	GQR88_RS22990						toxI
AU6208	GQR88_RS23890				B2SNH3	reduced virulence
AU6208	GQR88_RS23900				B2SNH4	reduced virulence
AU6208	GQR88_RS24185	VF0560	Capsule	Immune modulation
AU6208	GQR88_RS24215						toxJ
AU6208	GQR88_RS24305				C5AMW5	effector (plant avirulence determinant)
AU6208	GQR88_RS24560				A8YPP3	unaffected pathogenicity
AU6208	GQR88_RS24770				Q2T7Q1	reduced virulence
AU6208	GQR88_RS24775				Q2T7Q2	increased virulence (hypervirulence)
AU6208	GQR88_RS24915				Q0GYW2	reduced virulence
AU6208	GQR88_RS24925				Q0GYW4	reduced virulence
AU6208	GQR88_RS25125						toxF
AU6208	GQR88_RS25415				P19318	reduced virulence
AU6208	GQR88_RS26430	VF0159	Hsp60	Adherence
AU6208	GQR88_RS26650	VF0430	Flagella	Motility
AU6208	GQR88_RS26745	VF0430	Flagella	Motility
AU6208	GQR88_RS26955				B4EJI4	unaffected pathogenicity
AU6208	GQR88_RS27540				A0A2J9HLA0	reduced virulence
AU6208	GQR88_RS27560				A0A2J9HL87	reduced virulence
AU6208	GQR88_RS27900				Q8ZR28	reduced virulence
FDAARGOS_346	CEQ24_RS12900				C5A846	reduced virulence
FDAARGOS_346	CEQ24_RS12905				C5A845	reduced virulence
FDAARGOS_346	CEQ24_RS13050	VF0430	Flagella	Motility
FDAARGOS_346	CEQ24_RS13055	VF0430	Flagella	Motility
FDAARGOS_346	CEQ24_RS13060	VF0430	Flagella	Motility
FDAARGOS_346	CEQ24_RS13065	VF0430	Flagella	Motility
FDAARGOS_346	CEQ24_RS13070	VF0430	Flagella	Motility
FDAARGOS_346	CEQ24_RS13075	VF0430	Flagella	Motility
FDAARGOS_346	CEQ24_RS13670	VF0430	Flagella	Motility
FDAARGOS_346	CEQ24_RS13675	VF0430	Flagella	Motility
FDAARGOS_346	CEQ24_RS13680	VF0430	Flagella	Motility
FDAARGOS_346	CEQ24_RS13685	VF0430	Flagella	Motility
FDAARGOS_346	CEQ24_RS13690	VF0430	Flagella	Motility
FDAARGOS_346	CEQ24_RS13695	VF0430	Flagella	Motility
FDAARGOS_346	CEQ24_RS13700	VF0430	Flagella	Motility
FDAARGOS_346	CEQ24_RS13705	VF0430	Flagella	Motility
FDAARGOS_346	CEQ24_RS13740				B4E8H7	reduced virulence
FDAARGOS_346	CEQ24_RS13865	VF0430	Flagella	Motility
FDAARGOS_346	CEQ24_RS13870	VF0430	Flagella	Motility
FDAARGOS_346	CEQ24_RS13875	VF0430	Flagella	Motility
FDAARGOS_346	CEQ24_RS13890	VF0430	Flagella	Motility
FDAARGOS_346	CEQ24_RS13895	VF0430	Flagella	Motility
FDAARGOS_346	CEQ24_RS13900	VF0430	Flagella	Motility
FDAARGOS_346	CEQ24_RS13905	VF0430	Flagella	Motility
FDAARGOS_346	CEQ24_RS14205				B4E974	increased virulence (hypervirulence)
FDAARGOS_346	CEQ24_RS15075				Q8Y282	loss of pathogenicity
FDAARGOS_346	CEQ24_RS15140				C5AD21	reduced virulence
FDAARGOS_346	CEQ24_RS15565	VF0431	Type IV pili	Adherence
FDAARGOS_346	CEQ24_RS15570				C5ACT8	reduced virulence
FDAARGOS_346	CEQ24_RS15730						toxI
FDAARGOS_346	CEQ24_RS16015				B4E9E8	increased virulence (hypervirulence)
FDAARGOS_346	CEQ24_RS16120				A0A0K0GLJ4	unaffected pathogenicity
FDAARGOS_346	CEQ24_RS16590				Q8XWV5	loss of pathogenicity
FDAARGOS_346	CEQ24_RS18215				A0A088U1Z5	unaffected pathogenicity
FDAARGOS_346	CEQ24_RS18350				B4EDS9	reduced virulence
FDAARGOS_346	CEQ24_RS18365				A0A0L9JQ40	reduced virulence
FDAARGOS_346	CEQ24_RS18630				Q9I2U9	reduced virulence
FDAARGOS_346	CEQ24_RS18765						tofR
FDAARGOS_346	CEQ24_RS18780				Q8Y282	loss of pathogenicity
FDAARGOS_346	CEQ24_RS19325				Q2YJE8	reduced virulence
FDAARGOS_346	CEQ24_RS20410				C5AGX2	reduced virulence
FDAARGOS_346	CEQ24_RS21500	VF0433	Quorum-sensing	Biofilm
FDAARGOS_346	CEQ24_RS21750				C5AG42	reduced virulence
FDAARGOS_346	CEQ24_RS22110				A8YPP2	unaffected pathogenicity
FDAARGOS_346	CEQ24_RS22405				C5AFJ6	reduced virulence
FDAARGOS_346	CEQ24_RS22445				Q4UUL4	reduced virulence
FDAARGOS_346	CEQ24_RS22955				Q8PBY5	reduced virulence
FDAARGOS_346	CEQ24_RS22960				Q8PBY6	reduced virulence
FDAARGOS_346	CEQ24_RS23095				Q63T64	reduced virulence
FDAARGOS_346	CEQ24_RS24095				A0A069B091	reduced virulence
FDAARGOS_346	CEQ24_RS24780	VF0432	CdpA	Regulation	B4ED05	increased virulence (hypervirulence)
FDAARGOS_346	CEQ24_RS25100				Q8Y0J2	lethal
FDAARGOS_346	CEQ24_RS25275				Q8ZPL7	reduced virulence
FDAARGOS_346	CEQ24_RS25490				C5ACN1	reduced virulence
FDAARGOS_346	CEQ24_RS25515				Q75WC5	chemistry target: sensitivity to chemical
FDAARGOS_346	CEQ24_RS25905						toxE
FDAARGOS_346	CEQ24_RS26150				A0A2J9HCW0	reduced virulence
FDAARGOS_346	CEQ24_RS26260				Q9HU22	reduced virulence
FDAARGOS_346	CEQ24_RS26320	VF0159	Hsp60	Adherence
FDAARGOS_346	CEQ24_RS26435				B4ECX9	increased virulence (hypervirulence)
FDAARGOS_346	CEQ24_RS26450				Q63RC4	unaffected pathogenicity
FDAARGOS_346	CEQ24_RS26560	VF0436	Capsule I	Immune modulation	Q9AI28	reduced virulence
FDAARGOS_346	CEQ24_RS26565	VF0436	Capsule I	Immune modulation	Q63R85	reduced virulence
FDAARGOS_346	CEQ24_RS26570	VF0436	Capsule I	Immune modulation
FDAARGOS_346	CEQ24_RS26580	VF0436	Capsule I	Immune modulation
FDAARGOS_346	CEQ24_RS26635	VF0436	Capsule I	Immune modulation
FDAARGOS_346	CEQ24_RS26650	VF0436	Capsule I	Immune modulation
FDAARGOS_346	CEQ24_RS26785				Q8XW15	loss of pathogenicity
FDAARGOS_346	CEQ24_RS27495	VF0431	Type IV pili	Adherence
FDAARGOS_346	CEQ24_RS27505	VF0431	Type IV pili	Adherence
FDAARGOS_346	CEQ24_RS27685				A0A088U4K2	reduced virulence
FDAARGOS_346	CEQ24_RS27690				A0A088UAI6	reduced virulence
FDAARGOS_346	CEQ24_RS27695				A0A1V2Y2U7	increased virulence (hypervirulence)
FDAARGOS_346	CEQ24_RS27700				Q63QH7	reduced virulence
FDAARGOS_346	CEQ24_RS27925				B4E6S3	unaffected pathogenicity
FDAARGOS_346	CEQ24_RS27945				A0A5H2Q4P9	reduced virulence
FDAARGOS_346	CEQ24_RS27965				C5AA67	effector (plant avirulence determinant)
FDAARGOS_346	CEQ24_RS28335				C5A9K4	reduced virulence
FDAARGOS_346	CEQ24_RS28345				C5A9K2	effector (plant avirulence determinant)
FDAARGOS_346	CEQ24_RS28515				Q7VTC1	unaffected pathogenicity
FDAARGOS_346	CEQ24_RS28575	VF0460	EF-Tu	Adherence	W8TRT9	increased virulence (hypervirulence)
FDAARGOS_346	CEQ24_RS28650	VF0460	EF-Tu	Adherence	W8TRT9	increased virulence (hypervirulence)
FDAARGOS_346	CEQ24_RS28705				B4E5A2	reduced virulence
FDAARGOS_346	CEQ24_RS28710				B4E5A1	reduced virulence
FDAARGOS_346	CEQ24_RS28715				B4E5A0	reduced virulence
FDAARGOS_346	CEQ24_RS28720				B4E599	reduced virulence
FDAARGOS_346	CEQ24_RS28725				B4E598	reduced virulence
FDAARGOS_346	CEQ24_RS28825				C5A8Z0	reduced virulence
FDAARGOS_346	CEQ24_RS29025	VF0430	Flagella	Motility
FDAARGOS_346	CEQ24_RS29030	VF0430	Flagella	Motility
FDAARGOS_346	CEQ24_RS29040	VF0430	Flagella	Motility
FDAARGOS_346	CEQ24_RS29045	VF0430	Flagella	Motility
FDAARGOS_346	CEQ24_RS29065	VF0430	Flagella	Motility
FDAARGOS_346	CEQ24_RS29070	VF0430	Flagella	Motility	P0A2D5	reduced virulence
FDAARGOS_346	CEQ24_RS29075	VF0430	Flagella	Motility	P04042	reduced virulence
FDAARGOS_346	CEQ24_RS29080	VF0430	Flagella	Motility
FDAARGOS_346	CEQ24_RS29085	VF0430	Flagella	Motility
FDAARGOS_346	CEQ24_RS29090	VF0430	Flagella	Motility
FDAARGOS_346	CEQ24_RS29095	VF0430	Flagella	Motility	P0A964	unaffected pathogenicity
FDAARGOS_346	CEQ24_RS29100	VF0430	Flagella	Motility
FDAARGOS_346	CEQ24_RS29110	VF0430	Flagella	Motility
FDAARGOS_346	CEQ24_RS29115	VF0430	Flagella	Motility
FDAARGOS_346	CEQ24_RS29120						flhC
FDAARGOS_346	CEQ24_RS29125				C5A8V0	reduced virulence	flhD
FDAARGOS_346	CEQ24_RS29160	VF0430	Flagella	Motility
FDAARGOS_346	CEQ24_RS29180				A0A0J9WXH4	increased virulence (hypervirulence)
FDAARGOS_346	CEQ24_RS00060				B2SNH3	reduced virulence
FDAARGOS_346	CEQ24_RS00070				B2SNH4	reduced virulence
[truncated: 2,090 more rows]

## Sheet: MGEs_information
MGEs information of 26 strains
Srain	Source	Source_info	Gene	Product	#GO	GO IDs	GO Names	eggNOG_OGs	COG_category	COG Description	KO id	KO description	EC	Pathway name	KEGG term2 name	KEGG term1 name	Pfam accession	Pfam description
257sh-1	chromosome	chromosome:1	EXE55_RS00035	site-specific integrase	3	P:GO:0006310; P:GO:0015074; F:GO:0003677	P:DNA recombination; P:DNA integration; F:DNA binding	COG0582@1|root,COG0582@2|Bacteria,1MWBN@1224|Proteobacteria,2VK8Q@28216|Betaproteobacteria,1K61C@119060|Burkholderiaceae	L	Belongs to the 'phage' integrase family							PF00589	Phage integrase family
257sh-1	chromosome	chromosome:1	EXE55_RS00040	IS3 family transposase	5	P:GO:0006313; P:GO:0015074; F:GO:0003676; F:GO:0003677; F:GO:0004803	P:transposition, DNA-mediated; P:DNA integration; F:nucleic acid binding; F:DNA binding; F:transposase activity	COG2801@1|root,COG2963@1|root,COG2801@2|Bacteria,COG2963@2|Bacteria,1MY62@1224|Proteobacteria,2VJAF@28216|Betaproteobacteria,1K2XD@119060|Burkholderiaceae	L	transposase	K07497	K07497; putative transposase		Replication and repair	Unclassified: genetic information processing	Not Included in Pathway or Brite	PF01527	Transposase
257sh-1	chromosome	chromosome:1	EXE55_RS00040	IS3 family transposase	5	P:GO:0006313; P:GO:0015074; F:GO:0003676; F:GO:0003677; F:GO:0004803	P:transposition, DNA-mediated; P:DNA integration; F:nucleic acid binding; F:DNA binding; F:transposase activity	COG2801@1|root,COG2963@1|root,COG2801@2|Bacteria,COG2963@2|Bacteria,1MY62@1224|Proteobacteria,2VJAF@28216|Betaproteobacteria,1K2XD@119060|Burkholderiaceae	L	transposase	K07497	K07497; putative transposase		Replication and repair	Unclassified: genetic information processing	Not Included in Pathway or Brite	PF13276	HTH-like domain
257sh-1	chromosome	chromosome:1	EXE55_RS00040	IS3 family transposase	5	P:GO:0006313; P:GO:0015074; F:GO:0003676; F:GO:0003677; F:GO:0004803	P:transposition, DNA-mediated; P:DNA integration; F:nucleic acid binding; F:DNA binding; F:transposase activity	COG2801@1|root,COG2963@1|root,COG2801@2|Bacteria,COG2963@2|Bacteria,1MY62@1224|Proteobacteria,2VJAF@28216|Betaproteobacteria,1K2XD@119060|Burkholderiaceae	L	transposase	K07497	K07497; putative transposase		Replication and repair	Unclassified: genetic information processing	Not Included in Pathway or Brite	PF00665	Integrase core domain
257sh-1	chromosome	chromosome:1	EXE55_RS00045	phage integrase family protein				COG0582@1|root,COG0582@2|Bacteria,1MWBN@1224|Proteobacteria,1RPD0@1236|Gammaproteobacteria,1Y8AS@135625|Pasteurellales	L	Belongs to the 'phage' integrase family
257sh-1	chromosome	chromosome:1	EXE55_RS00115	IS5 family transposase	3	P:GO:0006313; F:GO:0003677; F:GO:0004803	P:transposition, DNA-mediated; F:DNA binding; F:transposase activity	COG3293@1|root,COG3293@2|Bacteria,1REUV@1224|Proteobacteria,2VREC@28216|Betaproteobacteria,1K6P0@119060|Burkholderiaceae	L	transposase							PF13340	Putative transposase of IS4/5 family (DUF4096)
257sh-1	chromosome	chromosome:1	EXE55_RS00115	IS5 family transposase	3	P:GO:0006313; F:GO:0003677; F:GO:0004803	P:transposition, DNA-mediated; F:DNA binding; F:transposase activity	COG3293@1|root,COG3293@2|Bacteria,1REUV@1224|Proteobacteria,2VREC@28216|Betaproteobacteria,1K6P0@119060|Burkholderiaceae	L	transposase							PF01609	Transposase DDE domain
257sh-1	chromosome	chromosome:1	EXE55_RS00165	IS481 family transposase	2	P:GO:0015074; F:GO:0003676	P:DNA integration; F:nucleic acid binding	COG2801@1|root,COG2801@2|Bacteria,1MZ45@1224|Proteobacteria,2VNA0@28216|Betaproteobacteria,1K69X@119060|Burkholderiaceae	L	Integrase core domain							PF13551	Winged helix-turn helix
257sh-1	chromosome	chromosome:1	EXE55_RS00165	IS481 family transposase	2	P:GO:0015074; F:GO:0003676	P:DNA integration; F:nucleic acid binding	COG2801@1|root,COG2801@2|Bacteria,1MZ45@1224|Proteobacteria,2VNA0@28216|Betaproteobacteria,1K69X@119060|Burkholderiaceae	L	Integrase core domain							PF13683	Integrase core domain
257sh-1	chromosome	chromosome:1	EXE55_RS00325	IS5 family transposase	3	P:GO:0006313; F:GO:0003677; F:GO:0004803	P:transposition, DNA-mediated; F:DNA binding; F:transposase activity	COG3293@1|root,COG3293@2|Bacteria,1REUV@1224|Proteobacteria,2VREC@28216|Betaproteobacteria,1K6P0@119060|Burkholderiaceae	L	transposase							PF13340	Putative transposase of IS4/5 family (DUF4096)
257sh-1	chromosome	chromosome:1	EXE55_RS00325	IS5 family transposase	3	P:GO:0006313; F:GO:0003677; F:GO:0004803	P:transposition, DNA-mediated; F:DNA binding; F:transposase activity	COG3293@1|root,COG3293@2|Bacteria,1REUV@1224|Proteobacteria,2VREC@28216|Betaproteobacteria,1K6P0@119060|Burkholderiaceae	L	transposase							PF01609	Transposase DDE domain
257sh-1	chromosome	chromosome:1	EXE55_RS00675	IS5 family transposase				COG3293@1|root,COG3293@2|Bacteria,1REUV@1224|Proteobacteria,1SD2K@1236|Gammaproteobacteria	L	COG3293 Transposase and inactivated derivatives							PF01609	Transposase DDE domain
257sh-1	chromosome	chromosome:1	EXE55_RS00675	IS5 family transposase				COG3293@1|root,COG3293@2|Bacteria,1REUV@1224|Proteobacteria,1SD2K@1236|Gammaproteobacteria	L	COG3293 Transposase and inactivated derivatives							PF13340	Putative transposase of IS4/5 family (DUF4096)
257sh-1	chromosome	chromosome:1	EXE55_RS00910	UvrD-helicase domain-containing protein	8	P:GO:0032508; F:GO:0000166; F:GO:0003677; F:GO:0003678; F:GO:0004386; F:GO:0005524; F:GO:0016787; F:GO:0016887	P:DNA duplex unwinding; F:nucleotide binding; F:DNA binding; F:DNA helicase activity; F:helicase activity; F:ATP binding; F:hydrolase activity; F:ATP hydrolysis activity	COG0210@1|root,COG0210@2|Bacteria,1MU0G@1224|Proteobacteria,2VH4I@28216|Betaproteobacteria,1K29A@119060|Burkholderiaceae	L	helicase	K03657	uvrD, pcrA; ATP-dependent DNA helicase UvrD/PcrA	[EC:5.6.2.4]	DNA repair and recombination proteins	Protein families: genetic information processing	Brite Hierarchies	PF00580	UvrD/REP helicase N-terminal domain
257sh-1	chromosome	chromosome:1	EXE55_RS00910	UvrD-helicase domain-containing protein	8	P:GO:0032508; F:GO:0000166; F:GO:0003677; F:GO:0003678; F:GO:0004386; F:GO:0005524; F:GO:0016787; F:GO:0016887	P:DNA duplex unwinding; F:nucleotide binding; F:DNA binding; F:DNA helicase activity; F:helicase activity; F:ATP binding; F:hydrolase activity; F:ATP hydrolysis activity	COG0210@1|root,COG0210@2|Bacteria,1MU0G@1224|Proteobacteria,2VH4I@28216|Betaproteobacteria,1K29A@119060|Burkholderiaceae	L	helicase	K03657	uvrD, pcrA; ATP-dependent DNA helicase UvrD/PcrA	[EC:5.6.2.4]	DNA repair and recombination proteins	Protein families: genetic information processing	Brite Hierarchies	PF13361	UvrD-like helicase C-terminal domain
257sh-1	chromosome	chromosome:1	EXE55_RS01100	integration host factor subunit alpha	4	P:GO:0006310; P:GO:0006355; P:GO:0006417; F:GO:0003677	P:DNA recombination; P:regulation of transcription, DNA-templated; P:regulation of translation; F:DNA binding	COG0776@1|root,COG0776@2|Bacteria,1RH5Z@1224|Proteobacteria,2VT12@28216|Betaproteobacteria,1K6Y9@119060|Burkholderiaceae	K	This protein is one of the two subunits of integration host factor, a specific DNA-binding protein that functions in genetic recombination as well as in transcriptional and translational control	K04764	ihfA, himA; integration host factor subunit alpha		DNA replication proteins	Protein families: genetic information processing	Brite Hierarchies	PF00216	Bacterial DNA-binding protein
257sh-1	chromosome	chromosome:1	EXE55_RS01100	integration host factor subunit alpha	4	P:GO:0006310; P:GO:0006355; P:GO:0006417; F:GO:0003677	P:DNA recombination; P:regulation of transcription, DNA-templated; P:regulation of translation; F:DNA binding	COG0776@1|root,COG0776@2|Bacteria,1RH5Z@1224|Proteobacteria,2VT12@28216|Betaproteobacteria,1K6Y9@119060|Burkholderiaceae	K	This protein is one of the two subunits of integration host factor, a specific DNA-binding protein that functions in genetic recombination as well as in transcriptional and translational control	K04764	ihfA, himA; integration host factor subunit alpha		Chromosome and associated proteins	Protein families: genetic information processing	Brite Hierarchies	PF00216	Bacterial DNA-binding protein
257sh-1	chromosome	chromosome:1	EXE55_RS01100	integration host factor subunit alpha	4	P:GO:0006310; P:GO:0006355; P:GO:0006417; F:GO:0003677	P:DNA recombination; P:regulation of transcription, DNA-templated; P:regulation of translation; F:DNA binding	COG0776@1|root,COG0776@2|Bacteria,1RH5Z@1224|Proteobacteria,2VT12@28216|Betaproteobacteria,1K6Y9@119060|Burkholderiaceae	K	This protein is one of the two subunits of integration host factor, a specific DNA-binding protein that functions in genetic recombination as well as in transcriptional and translational control	K04764	ihfA, himA; integration host factor subunit alpha		DNA repair and recombination proteins	Protein families: genetic information processing	Brite Hierarchies	PF00216	Bacterial DNA-binding protein
257sh-1	chromosome	chromosome:1	EXE55_RS01240	transposase				COG3293@1|root,COG3293@2|Bacteria,1RAWR@1224|Proteobacteria,2W3R7@28216|Betaproteobacteria,1K6Y0@119060|Burkholderiaceae	L	transposase	K07492	K07492; putative transposase		Replication and repair	Unclassified: genetic information processing	Not Included in Pathway or Brite	PF13340	Putative transposase of IS4/5 family (DUF4096)
257sh-1	chromosome	chromosome:1	EXE55_RS01340	transposase				COG3293@1|root,COG3293@2|Bacteria,1RAWR@1224|Proteobacteria,2VTFP@28216|Betaproteobacteria,1K8M2@119060|Burkholderiaceae	L	Putative transposase of IS4/5 family (DUF4096)							PF13340	Putative transposase of IS4/5 family (DUF4096)
257sh-1	chromosome	chromosome:1	EXE55_RS01570	IS5 family transposase	2	C:GO:0016020; C:GO:0016021	C:membrane; C:integral component of membrane	COG3039@1|root,COG3039@2|Bacteria,1MUVI@1224|Proteobacteria,2VK9J@28216|Betaproteobacteria,1K4IS@119060|Burkholderiaceae	L	Product type h extrachromosomal origin							PF05598	Transposase domain (DUF772)
257sh-1	chromosome	chromosome:1	EXE55_RS01570	IS5 family transposase	2	C:GO:0016020; C:GO:0016021	C:membrane; C:integral component of membrane	COG3039@1|root,COG3039@2|Bacteria,1MUVI@1224|Proteobacteria,2VK9J@28216|Betaproteobacteria,1K4IS@119060|Burkholderiaceae	L	Product type h extrachromosomal origin							PF01609	Transposase DDE domain
257sh-1	chromosome	chromosome:1	EXE55_RS01580	hypothetical protein				COG0582@1|root,COG0582@2|Bacteria,1REKP@1224|Proteobacteria,1T01S@1236|Gammaproteobacteria	L	Belongs to the 'phage' integrase family
257sh-1	chromosome	chromosome:1	EXE55_RS01645	IS3 family transposase	2	P:GO:0015074; F:GO:0003676	P:DNA integration; F:nucleic acid binding	COG2801@1|root,COG2801@2|Bacteria,1MVXQ@1224|Proteobacteria,2VHER@28216|Betaproteobacteria,1K13F@119060|Burkholderiaceae	L	Integrase core domain	K07497	K07497; putative transposase		Replication and repair	Unclassified: genetic information processing	Not Included in Pathway or Brite	PF01527	Transposase
257sh-1	chromosome	chromosome:1	EXE55_RS01645	IS3 family transposase	2	P:GO:0015074; F:GO:0003676	P:DNA integration; F:nucleic acid binding	COG2801@1|root,COG2801@2|Bacteria,1MVXQ@1224|Proteobacteria,2VHER@28216|Betaproteobacteria,1K13F@119060|Burkholderiaceae	L	Integrase core domain	K07497	K07497; putative transposase		Replication and repair	Unclassified: genetic information processing	Not Included in Pathway or Brite	PF13333	Integrase core domain
257sh-1	chromosome	chromosome:1	EXE55_RS01645	IS3 family transposase	2	P:GO:0015074; F:GO:0003676	P:DNA integration; F:nucleic acid binding	COG2801@1|root,COG2801@2|Bacteria,1MVXQ@1224|Proteobacteria,2VHER@28216|Betaproteobacteria,1K13F@119060|Burkholderiaceae	L	Integrase core domain	K07497	K07497; putative transposase		Replication and repair	Unclassified: genetic information processing	Not Included in Pathway or Brite	PF00665	Integrase core domain
257sh-1	chromosome	chromosome:1	EXE55_RS01645	IS3 family transposase	2	P:GO:0015074; F:GO:0003676	P:DNA integration; F:nucleic acid binding	COG2801@1|root,COG2801@2|Bacteria,1MVXQ@1224|Proteobacteria,2VHER@28216|Betaproteobacteria,1K13F@119060|Burkholderiaceae	L	Integrase core domain	K07497	K07497; putative transposase		Replication and repair	Unclassified: genetic information processing	Not Included in Pathway or Brite	PF13276	HTH-like domain
257sh-1	chromosome	chromosome:1	EXE55_RS01650	IS5 family transposase	3	P:GO:0006313; F:GO:0003677; F:GO:0004803	P:transposition, DNA-mediated; F:DNA binding; F:transposase activity	COG3293@1|root,COG3293@2|Bacteria,1REUV@1224|Proteobacteria,2VREC@28216|Betaproteobacteria,1K6P0@119060|Burkholderiaceae	L	transposase							PF01609	Transposase DDE domain
257sh-1	chromosome	chromosome:1	EXE55_RS01650	IS5 family transposase	3	P:GO:0006313; F:GO:0003677; F:GO:0004803	P:transposition, DNA-mediated; F:DNA binding; F:transposase activity	COG3293@1|root,COG3293@2|Bacteria,1REUV@1224|Proteobacteria,2VREC@28216|Betaproteobacteria,1K6P0@119060|Burkholderiaceae	L	transposase							PF13340	Putative transposase of IS4/5 family (DUF4096)
257sh-1	chromosome	chromosome:1	EXE55_RS01730	transcriptional repressor LexA	10	P:GO:0006260; P:GO:0006281; P:GO:0006355; P:GO:0006508; P:GO:0006974; P:GO:0009432; P:GO:0045892; F:GO:0003677; F:GO:0004252; F:GO:0016787	P:DNA replication; P:DNA repair; P:regulation of transcription, DNA-templated; P:proteolysis; P:cellular response to DNA damage stimulus; P:SOS response; P:negative regulation of transcription, DNA-templated; F:DNA binding; F:serine-type endopeptidase activity; F:hydrolase activity	COG1974@1|root,COG1974@2|Bacteria,1MW80@1224|Proteobacteria,2VHTZ@28216|Betaproteobacteria,1K1W2@119060|Burkholderiaceae	K	Represses a number of genes involved in the response to DNA damage (SOS response), including recA and lexA. In the presence of single-stranded DNA, RecA interacts with LexA causing an autocatalytic cleavage which disrupts the DNA-binding part of LexA, leading to derepression of the SOS regulon and eventually DNA repair	K01356	lexA; repressor LexA	[EC:3.4.21.88]	DNA repair and recombination proteins	Protein families: genetic information processing	Brite Hierarchies	PF01726	LexA DNA binding domain
257sh-1	chromosome	chromosome:1	EXE55_RS01730	transcriptional repressor LexA	10	P:GO:0006260; P:GO:0006281; P:GO:0006355; P:GO:0006508; P:GO:0006974; P:GO:0009432; P:GO:0045892; F:GO:0003677; F:GO:0004252; F:GO:0016787	P:DNA replication; P:DNA repair; P:regulation of transcription, DNA-templated; P:proteolysis; P:cellular response to DNA damage stimulus; P:SOS response; P:negative regulation of transcription, DNA-templated; F:DNA binding; F:serine-type endopeptidase activity; F:hydrolase activity	COG1974@1|root,COG1974@2|Bacteria,1MW80@1224|Proteobacteria,2VHTZ@28216|Betaproteobacteria,1K1W2@119060|Burkholderiaceae	K	Represses a number of genes involved in the response to DNA damage (SOS response), including recA and lexA. In the presence of single-stranded DNA, RecA interacts with LexA causing an autocatalytic cleavage which disrupts the DNA-binding part of LexA, leading to derepression of the SOS regulon and eventually DNA repair	K01356	lexA; repressor LexA	[EC:3.4.21.88]	DNA repair and recombination proteins	Protein families: genetic information processing	Brite Hierarchies	PF00717	Peptidase S24-like
257sh-1	chromosome	chromosome:1	EXE55_RS02610	uracil-DNA glycosylase	4	F:GO:0004844; F:GO:0046872; F:GO:0051536; F:GO:0051539	F:uracil DNA N-glycosylase activity; F:metal ion binding; F:iron-sulfur cluster binding; F:4 iron, 4 sulfur cluster binding	COG1573@1|root,COG1573@2|Bacteria,1MW8T@1224|Proteobacteria,2VMTJ@28216|Betaproteobacteria,1K5A3@119060|Burkholderiaceae	L	PFAM Uracil-DNA glycosylase superfamily	K21929	udg; uracil-DNA glycosylase	[EC:3.2.2.27]	DNA repair and recombination proteins	Protein families: genetic information processing	Brite Hierarchies	PF03167	Uracil DNA glycosylase superfamily
257sh-1	chromosome	chromosome:1	EXE55_RS03175	ATP-dependent DNA helicase	7	P:GO:0006139; F:GO:0000166; F:GO:0003676; F:GO:0004386; F:GO:0005524; F:GO:0016787; F:GO:0016818	P:nucleobase-containing compound metabolic process; F:nucleotide binding; F:nucleic acid binding; F:helicase activity; F:ATP binding; F:hydrolase activity; F:hydrolase activity, acting on acid anhydrides, in phosphorus-containing anhydrides	COG1199@1|root,COG1199@2|Bacteria,1MVCU@1224|Proteobacteria,2VH0V@28216|Betaproteobacteria,1K1T6@119060|Burkholderiaceae	KL	helicase	K03722	dinG; ATP-dependent DNA helicase DinG	[EC:5.6.2.3]	DNA repair and recombination proteins	Protein families: genetic information processing	Brite Hierarchies	PF13307	Helicase C-terminal domain
257sh-1	chromosome	chromosome:1	EXE55_RS03325	recombination mediator RecR	5	P:GO:0006281; P:GO:0006310; P:GO:0006974; F:GO:0003677; F:GO:0046872	P:DNA repair; P:DNA recombination; P:cellular response to DNA damage stimulus; F:DNA binding; F:metal ion binding	COG0353@1|root,COG0353@2|Bacteria,1MV9Q@1224|Proteobacteria,2VJVJ@28216|Betaproteobacteria,1K1AD@119060|Burkholderiaceae	L	May play a role in DNA repair. It seems to be involved in an RecBC-independent recombinational process of DNA repair. It may act with RecF and RecO	K06187	recR; recombination protein RecR		Homologous recombination	Replication and repair	Genetic Information Processing	PF02132	RecR protein
257sh-1	chromosome	chromosome:1	EXE55_RS03325	recombination mediator RecR	5	P:GO:0006281; P:GO:0006310; P:GO:0006974; F:GO:0003677; F:GO:0046872	P:DNA repair; P:DNA recombination; P:cellular response to DNA damage stimulus; F:DNA binding; F:metal ion binding	COG0353@1|root,COG0353@2|Bacteria,1MV9Q@1224|Proteobacteria,2VJVJ@28216|Betaproteobacteria,1K1AD@119060|Burkholderiaceae	L	May play a role in DNA repair. It seems to be involved in an RecBC-independent recombinational process of DNA repair. It may act with RecF and RecO	K06187	recR; recombination protein RecR		Homologous recombination	Replication and repair	Genetic Information Processing	PF13662	Toprim domain
257sh-1	chromosome	chromosome:1	EXE55_RS03325	recombination mediator RecR	5	P:GO:0006281; P:GO:0006310; P:GO:0006974; F:GO:0003677; F:GO:0046872	P:DNA repair; P:DNA recombination; P:cellular response to DNA damage stimulus; F:DNA binding; F:metal ion binding	COG0353@1|root,COG0353@2|Bacteria,1MV9Q@1224|Proteobacteria,2VJVJ@28216|Betaproteobacteria,1K1AD@119060|Burkholderiaceae	L	May play a role in DNA repair. It seems to be involved in an RecBC-independent recombinational process of DNA repair. It may act with RecF and RecO	K06187	recR; recombination protein RecR		DNA repair and recombination proteins	Protein families: genetic information processing	Brite Hierarchies	PF02132	RecR protein
257sh-1	chromosome	chromosome:1	EXE55_RS03325	recombination mediator RecR	5	P:GO:0006281; P:GO:0006310; P:GO:0006974; F:GO:0003677; F:GO:0046872	P:DNA repair; P:DNA recombination; P:cellular response to DNA damage stimulus; F:DNA binding; F:metal ion binding	COG0353@1|root,COG0353@2|Bacteria,1MV9Q@1224|Proteobacteria,2VJVJ@28216|Betaproteobacteria,1K1AD@119060|Burkholderiaceae	L	May play a role in DNA repair. It seems to be involved in an RecBC-independent recombinational process of DNA repair. It may act with RecF and RecO	K06187	recR; recombination protein RecR		DNA repair and recombination proteins	Protein families: genetic information processing	Brite Hierarchies	PF13662	Toprim domain
257sh-1	chromosome	chromosome:1	EXE55_RS03335	DNA polymerase III subunit gamma/tau	9	P:GO:0006260; P:GO:0071897; F:GO:0000166; F:GO:0003677; F:GO:0003887; F:GO:0005524; F:GO:0016740; F:GO:0016779; C:GO:0009360	P:DNA replication; P:DNA biosynthetic process; F:nucleotide binding; F:DNA binding; F:DNA-directed DNA polymerase activity; F:ATP binding; F:transferase activity; F:nucleotidyltransferase activity; C:DNA polymerase III complex	COG2812@1|root,COG2812@2|Bacteria,1MVCK@1224|Proteobacteria,2VIE0@28216|Betaproteobacteria,1K1R7@119060|Burkholderiaceae	L	DNA polymerase III is a complex, multichain enzyme responsible for most of the replicative synthesis in bacteria. This DNA polymerase also exhibits 3' to 5' exonuclease activity	K02343	dnaX; DNA polymerase III subunit gamma/tau	[EC:2.7.7.7]	Homologous recombination	Replication and repair	Genetic Information Processing	PF13177	DNA polymerase III, delta subunit
257sh-1	chromosome	chromosome:1	EXE55_RS03335	DNA polymerase III subunit gamma/tau	9	P:GO:0006260; P:GO:0071897; F:GO:0000166; F:GO:0003677; F:GO:0003887; F:GO:0005524; F:GO:0016740; F:GO:0016779; C:GO:0009360	P:DNA replication; P:DNA biosynthetic process; F:nucleotide binding; F:DNA binding; F:DNA-directed DNA polymerase activity; F:ATP binding; F:transferase activity; F:nucleotidyltransferase activity; C:DNA polymerase III complex	COG2812@1|root,COG2812@2|Bacteria,1MVCK@1224|Proteobacteria,2VIE0@28216|Betaproteobacteria,1K1R7@119060|Burkholderiaceae	L	DNA polymerase III is a complex, multichain enzyme responsible for most of the replicative synthesis in bacteria. This DNA polymerase also exhibits 3' to 5' exonuclease activity	K02343	dnaX; DNA polymerase III subunit gamma/tau	[EC:2.7.7.7]	Homologous recombination	Replication and repair	Genetic Information Processing	PF12170	DNA polymerase III tau subunit V interacting with alpha
257sh-1	chromosome	chromosome:1	EXE55_RS03335	DNA polymerase III subunit gamma/tau	9	P:GO:0006260; P:GO:0071897; F:GO:0000166; F:GO:0003677; F:GO:0003887; F:GO:0005524; F:GO:0016740; F:GO:0016779; C:GO:0009360	P:DNA replication; P:DNA biosynthetic process; F:nucleotide binding; F:DNA binding; F:DNA-directed DNA polymerase activity; F:ATP binding; F:transferase activity; F:nucleotidyltransferase activity; C:DNA polymerase III complex	COG2812@1|root,COG2812@2|Bacteria,1MVCK@1224|Proteobacteria,2VIE0@28216|Betaproteobacteria,1K1R7@119060|Burkholderiaceae	L	DNA polymerase III is a complex, multichain enzyme responsible for most of the replicative synthesis in bacteria. This DNA polymerase also exhibits 3' to 5' exonuclease activity	K02343	dnaX; DNA polymerase III subunit gamma/tau	[EC:2.7.7.7]	Homologous recombination	Replication and repair	Genetic Information Processing	PF12169	DNA polymerase III subunits gamma and tau domain III
257sh-1	chromosome	chromosome:1	EXE55_RS03335	DNA polymerase III subunit gamma/tau	9	P:GO:0006260; P:GO:0071897; F:GO:0000166; F:GO:0003677; F:GO:0003887; F:GO:0005524; F:GO:0016740; F:GO:0016779; C:GO:0009360	P:DNA replication; P:DNA biosynthetic process; F:nucleotide binding; F:DNA binding; F:DNA-directed DNA polymerase activity; F:ATP binding; F:transferase activity; F:nucleotidyltransferase activity; C:DNA polymerase III complex	COG2812@1|root,COG2812@2|Bacteria,1MVCK@1224|Proteobacteria,2VIE0@28216|Betaproteobacteria,1K1R7@119060|Burkholderiaceae	L	DNA polymerase III is a complex, multichain enzyme responsible for most of the replicative synthesis in bacteria. This DNA polymerase also exhibits 3' to 5' exonuclease activity	K02343	dnaX; DNA polymerase III subunit gamma/tau	[EC:2.7.7.7]	DNA repair and recombination proteins	Protein families: genetic information processing	Brite Hierarchies	PF13177	DNA polymerase III, delta subunit
257sh-1	chromosome	chromosome:1	EXE55_RS03335	DNA polymerase III subunit gamma/tau	9	P:GO:0006260; P:GO:0071897; F:GO:0000166; F:GO:0003677; F:GO:0003887; F:GO:0005524; F:GO:0016740; F:GO:0016779; C:GO:0009360	P:DNA replication; P:DNA biosynthetic process; F:nucleotide binding; F:DNA binding; F:DNA-directed DNA polymerase activity; F:ATP binding; F:transferase activity; F:nucleotidyltransferase activity; C:DNA polymerase III complex	COG2812@1|root,COG2812@2|Bacteria,1MVCK@1224|Proteobacteria,2VIE0@28216|Betaproteobacteria,1K1R7@119060|Burkholderiaceae	L	DNA polymerase III is a complex, multichain enzyme responsible for most of the replicative synthesis in bacteria. This DNA polymerase also exhibits 3' to 5' exonuclease activity	K02343	dnaX; DNA polymerase III subunit gamma/tau	[EC:2.7.7.7]	DNA repair and recombination proteins	Protein families: genetic information processing	Brite Hierarchies	PF12170	DNA polymerase III tau subunit V interacting with alpha
257sh-1	chromosome	chromosome:1	EXE55_RS03335	DNA polymerase III subunit gamma/tau	9	P:GO:0006260; P:GO:0071897; F:GO:0000166; F:GO:0003677; F:GO:0003887; F:GO:0005524; F:GO:0016740; F:GO:0016779; C:GO:0009360	P:DNA replication; P:DNA biosynthetic process; F:nucleotide binding; F:DNA binding; F:DNA-directed DNA polymerase activity; F:ATP binding; F:transferase activity; F:nucleotidyltransferase activity; C:DNA polymerase III complex	COG2812@1|root,COG2812@2|Bacteria,1MVCK@1224|Proteobacteria,2VIE0@28216|Betaproteobacteria,1K1R7@119060|Burkholderiaceae	L	DNA polymerase III is a complex, multichain enzyme responsible for most of the replicative synthesis in bacteria. This DNA polymerase also exhibits 3' to 5' exonuclease activity	K02343	dnaX; DNA polymerase III subunit gamma/tau	[EC:2.7.7.7]	DNA repair and recombination proteins	Protein families: genetic information processing	Brite Hierarchies	PF12169	DNA polymerase III subunits gamma and tau domain III
257sh-1	chromosome	chromosome:1	EXE55_RS03510	IS3 family transposase				COG2801@1|root,COG2801@2|Bacteria,1MY62@1224|Proteobacteria,2VJAF@28216|Betaproteobacteria,1K2XD@119060|Burkholderiaceae	L	transposase	K07497	K07497; putative transposase		Replication and repair	Unclassified: genetic information processing	Not Included in Pathway or Brite	PF13683	Integrase core domain
257sh-1	chromosome	chromosome:1	EXE55_RS03510	IS3 family transposase				COG2801@1|root,COG2801@2|Bacteria,1MY62@1224|Proteobacteria,2VJAF@28216|Betaproteobacteria,1K2XD@119060|Burkholderiaceae	L	transposase	K07497	K07497; putative transposase		Replication and repair	Unclassified: genetic information processing	Not Included in Pathway or Brite	PF01527	Transposase
257sh-1	chromosome	chromosome:1	EXE55_RS03510	IS3 family transposase				COG2801@1|root,COG2801@2|Bacteria,1MY62@1224|Proteobacteria,2VJAF@28216|Betaproteobacteria,1K2XD@119060|Burkholderiaceae	L	transposase	K07497	K07497; putative transposase		Replication and repair	Unclassified: genetic information processing	Not Included in Pathway or Brite	PF13276	HTH-like domain
257sh-1	chromosome	chromosome:1	EXE55_RS03515	IS481 family transposase	2	P:GO:0015074; F:GO:0003676	P:DNA integration; F:nucleic acid binding	COG2801@1|root,COG2801@2|Bacteria,1MZ45@1224|Proteobacteria,2VNA0@28216|Betaproteobacteria,1K69X@119060|Burkholderiaceae	L	Integrase core domain							PF13683	Integrase core domain
257sh-1	chromosome	chromosome:1	EXE55_RS03515	IS481 family transposase	2	P:GO:0015074; F:GO:0003676	P:DNA integration; F:nucleic acid binding	COG2801@1|root,COG2801@2|Bacteria,1MZ45@1224|Proteobacteria,2VNA0@28216|Betaproteobacteria,1K69X@119060|Burkholderiaceae	L	Integrase core domain							PF13551	Winged helix-turn helix
257sh-1	chromosome	chromosome:1	EXE55_RS03565	primosomal replication protein N	6	P:GO:0006260; P:GO:0006269; F:GO:0003677; F:GO:0003697; C:GO:0030894; C:GO:1990077	P:DNA replication; P:DNA replication, synthesis of RNA primer; F:DNA binding; F:single-stranded DNA binding; C:replisome; C:primosome complex	COG2965@1|root,COG2965@2|Bacteria,1N98W@1224|Proteobacteria,2VVZ4@28216|Betaproteobacteria,1K8MD@119060|Burkholderiaceae	L	Binds single-stranded DNA at the primosome assembly site (PAS)	K02686	priB; primosomal replication protein N		Homologous recombination	Replication and repair	Genetic Information Processing
257sh-1	chromosome	chromosome:1	EXE55_RS03565	primosomal replication protein N	6	P:GO:0006260; P:GO:0006269; F:GO:0003677; F:GO:0003697; C:GO:0030894; C:GO:1990077	P:DNA replication; P:DNA replication, synthesis of RNA primer; F:DNA binding; F:single-stranded DNA binding; C:replisome; C:primosome complex	COG2965@1|root,COG2965@2|Bacteria,1N98W@1224|Proteobacteria,2VVZ4@28216|Betaproteobacteria,1K8MD@119060|Burkholderiaceae	L	Binds single-stranded DNA at the primosome assembly site (PAS)	K02686	priB; primosomal replication protein N		DNA repair and recombination proteins	Protein families: genetic information processing	Brite Hierarchies
257sh-1	chromosome	chromosome:1	EXE55_RS03640	DNA polymerase III subunit delta'	7	P:GO:0006260; P:GO:0071897; P:GO:0090305; F:GO:0003887; F:GO:0008408; F:GO:0016740; F:GO:0016779	P:DNA replication; P:DNA biosynthetic process; P:nucleic acid phosphodiester bond hydrolysis; F:DNA-directed DNA polymerase activity; F:3'-5' exonuclease activity; F:transferase activity; F:nucleotidyltransferase activity	COG0470@1|root,COG0470@2|Bacteria,1MY1W@1224|Proteobacteria,2VNED@28216|Betaproteobacteria,1K0JG@119060|Burkholderiaceae	L	dna polymerase iii	K02341	holB; DNA polymerase III subunit delta'	[EC:2.7.7.7]	Homologous recombination	Replication and repair	Genetic Information Processing	PF13177	DNA polymerase III, delta subunit
257sh-1	chromosome	chromosome:1	EXE55_RS03640	DNA polymerase III subunit delta'	7	P:GO:0006260; P:GO:0071897; P:GO:0090305; F:GO:0003887; F:GO:0008408; F:GO:0016740; F:GO:0016779	P:DNA replication; P:DNA biosynthetic process; P:nucleic acid phosphodiester bond hydrolysis; F:DNA-directed DNA polymerase activity; F:3'-5' exonuclease activity; F:transferase activity; F:nucleotidyltransferase activity	COG0470@1|root,COG0470@2|Bacteria,1MY1W@1224|Proteobacteria,2VNED@28216|Betaproteobacteria,1K0JG@119060|Burkholderiaceae	L	dna polymerase iii	K02341	holB; DNA polymerase III subunit delta'	[EC:2.7.7.7]	DNA repair and recombination proteins	Protein families: genetic information processing	Brite Hierarchies	PF13177	DNA polymerase III, delta subunit
257sh-1	chromosome	chromosome:1	EXE55_RS03795	HU family DNA-binding protein	4	P:GO:0006310; P:GO:0006355; P:GO:0006417; F:GO:0003677	P:DNA recombination; P:regulation of transcription, DNA-templated; P:regulation of translation; F:DNA binding	COG0776@1|root,COG0776@2|Bacteria,1MZ5B@1224|Proteobacteria,2VU4V@28216|Betaproteobacteria,1K8CW@119060|Burkholderiaceae	L	Histone-like DNA-binding protein which is capable of wrapping DNA to stabilize it, and thus to prevent its denaturation under extreme environmental conditions	K03530	hupB; DNA-binding protein HU-beta		DNA replication proteins	Protein families: genetic information processing	Brite Hierarchies	PF00216	Bacterial DNA-binding protein
257sh-1	chromosome	chromosome:1	EXE55_RS03795	HU family DNA-binding protein	4	P:GO:0006310; P:GO:0006355; P:GO:0006417; F:GO:0003677	P:DNA recombination; P:regulation of transcription, DNA-templated; P:regulation of translation; F:DNA binding	COG0776@1|root,COG0776@2|Bacteria,1MZ5B@1224|Proteobacteria,2VU4V@28216|Betaproteobacteria,1K8CW@119060|Burkholderiaceae	L	Histone-like DNA-binding protein which is capable of wrapping DNA to stabilize it, and thus to prevent its denaturation under extreme environmental conditions	K03530	hupB; DNA-binding protein HU-beta		Chromosome and associated proteins	Protein families: genetic information processing	Brite Hierarchies	PF00216	Bacterial DNA-binding protein
257sh-1	chromosome	chromosome:1	EXE55_RS03795	HU family DNA-binding protein	4	P:GO:0006310; P:GO:0006355; P:GO:0006417; F:GO:0003677	P:DNA recombination; P:regulation of transcription, DNA-templated; P:regulation of translation; F:DNA binding	COG0776@1|root,COG0776@2|Bacteria,1MZ5B@1224|Proteobacteria,2VU4V@28216|Betaproteobacteria,1K8CW@119060|Burkholderiaceae	L	Histone-like DNA-binding protein which is capable of wrapping DNA to stabilize it, and thus to prevent its denaturation under extreme environmental conditions	K03530	hupB; DNA-binding protein HU-beta		DNA repair and recombination proteins	Protein families: genetic information processing	Brite Hierarchies	PF00216	Bacterial DNA-binding protein
257sh-1	chromosome	chromosome:1	EXE55_RS03920	transcription-repair coupling factor	16	P:GO:0000716; P:GO:0006281; P:GO:0006289; P:GO:0006355; P:GO:0006974; F:GO:0000166; F:GO:0003676; F:GO:0003677; F:GO:0003684; F:GO:0004386; F:GO:0005524; F:GO:0008094; F:GO:0016787; F:GO:0016887; C:GO:0005737; C:GO:0009380	P:transcription-coupled nucleotide-excision repair, DNA damage recognition; P:DNA repair; P:nucleotide-excision repair; P:regulation of transcription, DNA-templated; P:cellular response to DNA damage stimulus; F:nucleotide binding; F:nucleic acid binding; F:DNA binding; F:damaged DNA binding; F:helicase activity; F:ATP binding; F:ATP-dependent activity, acting on DNA; F:hydrolase activity; F:ATP …	COG1197@1|root,COG1197@2|Bacteria,1MUXG@1224|Proteobacteria,2VI7M@28216|Betaproteobacteria,1K06P@119060|Burkholderiaceae	L	Couples transcription and DNA repair by recognizing RNA polymerase (RNAP) stalled at DNA lesions. Mediates ATP-dependent release of RNAP and its truncated transcript from the DNA, and recruitment of nucleotide excision repair machinery to the damaged site	K03723	mfd; transcription-repair coupling factor (superfamily II helicase)	[EC:3.6.4.-]	DNA repair and recombination proteins	Protein families: genetic information processing	Brite Hierarchies	PF00270	DEAD/DEAH box helicase
257sh-1	chromosome	chromosome:1	EXE55_RS03920	transcription-repair coupling factor	16	P:GO:0000716; P:GO:0006281; P:GO:0006289; P:GO:0006355; P:GO:0006974; F:GO:0000166; F:GO:0003676; F:GO:0003677; F:GO:0003684; F:GO:0004386; F:GO:0005524; F:GO:0008094; F:GO:0016787; F:GO:0016887; C:GO:0005737; C:GO:0009380	P:transcription-coupled nucleotide-excision repair, DNA damage recognition; P:DNA repair; P:nucleotide-excision repair; P:regulation of transcription, DNA-templated; P:cellular response to DNA damage stimulus; F:nucleotide binding; F:nucleic acid binding; F:DNA binding; F:damaged DNA binding; F:helicase activity; F:ATP binding; F:ATP-dependent activity, acting on DNA; F:hydrolase activity; F:ATP …	COG1197@1|root,COG1197@2|Bacteria,1MUXG@1224|Proteobacteria,2VI7M@28216|Betaproteobacteria,1K06P@119060|Burkholderiaceae	L	Couples transcription and DNA repair by recognizing RNA polymerase (RNAP) stalled at DNA lesions. Mediates ATP-dependent release of RNAP and its truncated transcript from the DNA, and recruitment of nucleotide excision repair machinery to the damaged site	K03723	mfd; transcription-repair coupling factor (superfamily II helicase)	[EC:3.6.4.-]	DNA repair and recombination proteins	Protein families: genetic information processing	Brite Hierarchies	PF00271	Helicase conserved C-terminal domain
257sh-1	chromosome	chromosome:1	EXE55_RS03920	transcription-repair coupling factor	16	P:GO:0000716; P:GO:0006281; P:GO:0006289; P:GO:0006355; P:GO:0006974; F:GO:0000166; F:GO:0003676; F:GO:0003677; F:GO:0003684; F:GO:0004386; F:GO:0005524; F:GO:0008094; F:GO:0016787; F:GO:0016887; C:GO:0005737; C:GO:0009380	P:transcription-coupled nucleotide-excision repair, DNA damage recognition; P:DNA repair; P:nucleotide-excision repair; P:regulation of transcription, DNA-templated; P:cellular response to DNA damage stimulus; F:nucleotide binding; F:nucleic acid binding; F:DNA binding; F:damaged DNA binding; F:helicase activity; F:ATP binding; F:ATP-dependent activity, acting on DNA; F:hydrolase activity; F:ATP …	COG1197@1|root,COG1197@2|Bacteria,1MUXG@1224|Proteobacteria,2VI7M@28216|Betaproteobacteria,1K06P@119060|Burkholderiaceae	L	Couples transcription and DNA repair by recognizing RNA polymerase (RNAP) stalled at DNA lesions. Mediates ATP-dependent release of RNAP and its truncated transcript from the DNA, and recruitment of nucleotide excision repair machinery to the damaged site	K03723	mfd; transcription-repair coupling factor (superfamily II helicase)	[EC:3.6.4.-]	DNA repair and recombination proteins	Protein families: genetic information processing	Brite Hierarchies	PF03461	TRCF domain
257sh-1	chromosome	chromosome:1	EXE55_RS03920	transcription-repair coupling factor	16	P:GO:0000716; P:GO:0006281; P:GO:0006289; P:GO:0006355; P:GO:0006974; F:GO:0000166; F:GO:0003676; F:GO:0003677; F:GO:0003684; F:GO:0004386; F:GO:0005524; F:GO:0008094; F:GO:0016787; F:GO:0016887; C:GO:0005737; C:GO:0009380	P:transcription-coupled nucleotide-excision repair, DNA damage recognition; P:DNA repair; P:nucleotide-excision repair; P:regulation of transcription, DNA-templated; P:cellular response to DNA damage stimulus; F:nucleotide binding; F:nucleic acid binding; F:DNA binding; F:damaged DNA binding; F:helicase activity; F:ATP binding; F:ATP-dependent activity, acting on DNA; F:hydrolase activity; F:ATP …	COG1197@1|root,COG1197@2|Bacteria,1MUXG@1224|Proteobacteria,2VI7M@28216|Betaproteobacteria,1K06P@119060|Burkholderiaceae	L	Couples transcription and DNA repair by recognizing RNA polymerase (RNAP) stalled at DNA lesions. Mediates ATP-dependent release of RNAP and its truncated transcript from the DNA, and recruitment of nucleotide excision repair machinery to the damaged site	K03723	mfd; transcription-repair coupling factor (superfamily II helicase)	[EC:3.6.4.-]	DNA repair and recombination proteins	Protein families: genetic information processing	Brite Hierarchies	PF17757	UvrB interaction domain
257sh-1	chromosome	chromosome:1	EXE55_RS03920	transcription-repair coupling factor	16	P:GO:0000716; P:GO:0006281; P:GO:0006289; P:GO:0006355; P:GO:0006974; F:GO:0000166; F:GO:0003676; F:GO:0003677; F:GO:0003684; F:GO:0004386; F:GO:0005524; F:GO:0008094; F:GO:0016787; F:GO:0016887; C:GO:0005737; C:GO:0009380	P:transcription-coupled nucleotide-excision repair, DNA damage recognition; P:DNA repair; P:nucleotide-excision repair; P:regulation of transcription, DNA-templated; P:cellular response to DNA damage stimulus; F:nucleotide binding; F:nucleic acid binding; F:DNA binding; F:damaged DNA binding; F:helicase activity; F:ATP binding; F:ATP-dependent activity, acting on DNA; F:hydrolase activity; F:ATP …	COG1197@1|root,COG1197@2|Bacteria,1MUXG@1224|Proteobacteria,2VI7M@28216|Betaproteobacteria,1K06P@119060|Burkholderiaceae	L	Couples transcription and DNA repair by recognizing RNA polymerase (RNAP) stalled at DNA lesions. Mediates ATP-dependent release of RNAP and its truncated transcript from the DNA, and recruitment of nucleotide excision repair machinery to the damaged site	K03723	mfd; transcription-repair coupling factor (superfamily II helicase)	[EC:3.6.4.-]	DNA repair and recombination proteins	Protein families: genetic information processing	Brite Hierarchies	PF02559	CarD-like/TRCF domain
257sh-1	chromosome	chromosome:1	EXE55_RS29715	NAD-dependent DNA ligase LigA	9	P:GO:0006259; P:GO:0006260; P:GO:0006266; P:GO:0006281; P:GO:0006974; F:GO:0003677; F:GO:0003911; F:GO:0016874; F:GO:0046872	P:DNA metabolic process; P:DNA replication; P:DNA ligation; P:DNA repair; P:cellular response to DNA damage stimulus; F:DNA binding; F:DNA ligase (NAD+) activity; F:ligase activity; F:metal ion binding	COG0272@1|root,COG0272@2|Bacteria,1MV3R@1224|Proteobacteria,2VIDE@28216|Betaproteobacteria,1K0GW@119060|Burkholderiaceae	L	DNA ligase that catalyzes the formation of phosphodiester linkages between 5'-phosphoryl and 3'-hydroxyl groups in double-stranded DNA using NAD as a coenzyme and as the energy source for the reaction. It is essential for DNA replication and repair of damaged DNA	K01972	E6.5.1.2, ligA, ligB; DNA ligase (NAD+)	[EC:6.5.1.2]	DNA repair and recombination proteins	Protein families: genetic information processing	Brite Hierarchies	PF01653	NAD-dependent DNA ligase adenylation domain
257sh-1	chromosome	chromosome:1	EXE55_RS29715	NAD-dependent DNA ligase LigA	9	P:GO:0006259; P:GO:0006260; P:GO:0006266; P:GO:0006281; P:GO:0006974; F:GO:0003677; F:GO:0003911; F:GO:0016874; F:GO:0046872	P:DNA metabolic process; P:DNA replication; P:DNA ligation; P:DNA repair; P:cellular response to DNA damage stimulus; F:DNA binding; F:DNA ligase (NAD+) activity; F:ligase activity; F:metal ion binding	COG0272@1|root,COG0272@2|Bacteria,1MV3R@1224|Proteobacteria,2VIDE@28216|Betaproteobacteria,1K0GW@119060|Burkholderiaceae	L	DNA ligase that catalyzes the formation of phosphodiester linkages between 5'-phosphoryl and 3'-hydroxyl groups in double-stranded DNA using NAD as a coenzyme and as the energy source for the reaction. It is essential for DNA replication and repair of damaged DNA	K01972	E6.5.1.2, ligA, ligB; DNA ligase (NAD+)	[EC:6.5.1.2]	DNA repair and recombination proteins	Protein families: genetic information processing	Brite Hierarchies	PF14520	Helix-hairpin-helix domain
257sh-1	chromosome	chromosome:1	EXE55_RS29715	NAD-dependent DNA ligase LigA	9	P:GO:0006259; P:GO:0006260; P:GO:0006266; P:GO:0006281; P:GO:0006974; F:GO:0003677; F:GO:0003911; F:GO:0016874; F:GO:0046872	P:DNA metabolic process; P:DNA replication; P:DNA ligation; P:DNA repair; P:cellular response to DNA damage stimulus; F:DNA binding; F:DNA ligase (NAD+) activity; F:ligase activity; F:metal ion binding	COG0272@1|root,COG0272@2|Bacteria,1MV3R@1224|Proteobacteria,2VIDE@28216|Betaproteobacteria,1K0GW@119060|Burkholderiaceae	L	DNA ligase that catalyzes the formation of phosphodiester linkages between 5'-phosphoryl and 3'-hydroxyl groups in double-stranded DNA using NAD as a coenzyme and as the energy source for the reaction. It is essential for DNA replication and repair of damaged DNA	K01972	E6.5.1.2, ligA, ligB; DNA ligase (NAD+)	[EC:6.5.1.2]	DNA repair and recombination proteins	Protein families: genetic information processing	Brite Hierarchies	PF12826	Helix-hairpin-helix motif
257sh-1	chromosome	chromosome:1	EXE55_RS29715	NAD-dependent DNA ligase LigA	9	P:GO:0006259; P:GO:0006260; P:GO:0006266; P:GO:0006281; P:GO:0006974; F:GO:0003677; F:GO:0003911; F:GO:0016874; F:GO:0046872	P:DNA metabolic process; P:DNA replication; P:DNA ligation; P:DNA repair; P:cellular response to DNA damage stimulus; F:DNA binding; F:DNA ligase (NAD+) activity; F:ligase activity; F:metal ion binding	COG0272@1|root,COG0272@2|Bacteria,1MV3R@1224|Proteobacteria,2VIDE@28216|Betaproteobacteria,1K0GW@119060|Burkholderiaceae	L	DNA ligase that catalyzes the formation of phosphodiester linkages between 5'-phosphoryl and 3'-hydroxyl groups in double-stranded DNA using NAD as a coenzyme and as the energy source for the reaction. It is essential for DNA replication and repair of damaged DNA	K01972	E6.5.1.2, ligA, ligB; DNA ligase (NAD+)	[EC:6.5.1.2]	DNA repair and recombination proteins	Protein families: genetic information processing	Brite Hierarchies	PF03120	NAD-dependent DNA ligase OB-fold domain
257sh-1	chromosome	chromosome:1	EXE55_RS29715	NAD-dependent DNA ligase LigA	9	P:GO:0006259; P:GO:0006260; P:GO:0006266; P:GO:0006281; P:GO:0006974; F:GO:0003677; F:GO:0003911; F:GO:0016874; F:GO:0046872	P:DNA metabolic process; P:DNA replication; P:DNA ligation; P:DNA repair; P:cellular response to DNA damage stimulus; F:DNA binding; F:DNA ligase (NAD+) activity; F:ligase activity; F:metal ion binding	COG0272@1|root,COG0272@2|Bacteria,1MV3R@1224|Proteobacteria,2VIDE@28216|Betaproteobacteria,1K0GW@119060|Burkholderiaceae	L	DNA ligase that catalyzes the formation of phosphodiester linkages between 5'-phosphoryl and 3'-hydroxyl groups in double-stranded DNA using NAD as a coenzyme and as the energy source for the reaction. It is essential for DNA replication and repair of damaged DNA	K01972	E6.5.1.2, ligA, ligB; DNA ligase (NAD+)	[EC:6.5.1.2]	DNA repair and recombination proteins	Protein families: genetic information processing	Brite Hierarchies	PF03119	NAD-dependent DNA ligase C4 zinc finger domain
257sh-1	chromosome	chromosome:1	EXE55_RS29715	NAD-dependent DNA ligase LigA	9	P:GO:0006259; P:GO:0006260; P:GO:0006266; P:GO:0006281; P:GO:0006974; F:GO:0003677; F:GO:0003911; F:GO:0016874; F:GO:0046872	P:DNA metabolic process; P:DNA replication; P:DNA ligation; P:DNA repair; P:cellular response to DNA damage stimulus; F:DNA binding; F:DNA ligase (NAD+) activity; F:ligase activity; F:metal ion binding	COG0272@1|root,COG0272@2|Bacteria,1MV3R@1224|Proteobacteria,2VIDE@28216|Betaproteobacteria,1K0GW@119060|Burkholderiaceae	L	DNA ligase that catalyzes the formation of phosphodiester linkages between 5'-phosphoryl and 3'-hydroxyl groups in double-stranded DNA using NAD as a coenzyme and as the energy source for the reaction. It is essential for DNA replication and repair of damaged DNA	K01972	E6.5.1.2, ligA, ligB; DNA ligase (NAD+)	[EC:6.5.1.2]	DNA repair and recombination proteins	Protein families: genetic information processing	Brite Hierarchies	PF00533	BRCA1 C Terminus (BRCT) domain
257sh-1	chromosome	chromosome:1	EXE55_RS04295	DNA repair protein RadA	14	P:GO:0000725; P:GO:0006281; P:GO:0006508; P:GO:0006974; F:GO:0000166; F:GO:0003677; F:GO:0003684; F:GO:0004176; F:GO:0004252; F:GO:0005524; F:GO:0008094; F:GO:0008233; F:GO:0016787; F:GO:0046872	P:recombinational repair; P:DNA repair; P:proteolysis; P:cellular response to DNA damage stimulus; F:nucleotide binding; F:DNA binding; F:damaged DNA binding; F:ATP-dependent peptidase activity; F:serine-type endopeptidase activity; F:ATP binding; F:ATP-dependent activity, acting on DNA; F:peptidase activity; F:hydrolase activity; F:metal ion binding	COG1066@1|root,COG1066@2|Bacteria,1MUJQ@1224|Proteobacteria,2VH93@28216|Betaproteobacteria,1K1ZE@119060|Burkholderiaceae	O	DNA-dependent ATPase involved in processing of recombination intermediates, plays a role in repairing DNA breaks. Stimulates the branch migration of RecA-mediated strand transfer reactions, allowing the 3' invading strand to extend heteroduplex DNA faster. Binds ssDNA in the presence of ADP but not other nucleotides, has ATPase activity that is stimulated by ssDNA and various branched DNA structu…	K04485	radA, sms; DNA repair protein RadA/Sms		DNA repair and recombination proteins	Protein families: genetic information processing	Brite Hierarchies	PF13481	AAA domain
257sh-1	chromosome	chromosome:1	EXE55_RS04295	DNA repair protein RadA	14	P:GO:0000725; P:GO:0006281; P:GO:0006508; P:GO:0006974; F:GO:0000166; F:GO:0003677; F:GO:0003684; F:GO:0004176; F:GO:0004252; F:GO:0005524; F:GO:0008094; F:GO:0008233; F:GO:0016787; F:GO:0046872	P:recombinational repair; P:DNA repair; P:proteolysis; P:cellular response to DNA damage stimulus; F:nucleotide binding; F:DNA binding; F:damaged DNA binding; F:ATP-dependent peptidase activity; F:serine-type endopeptidase activity; F:ATP binding; F:ATP-dependent activity, acting on DNA; F:peptidase activity; F:hydrolase activity; F:metal ion binding	COG1066@1|root,COG1066@2|Bacteria,1MUJQ@1224|Proteobacteria,2VH93@28216|Betaproteobacteria,1K1ZE@119060|Burkholderiaceae	O	DNA-dependent ATPase involved in processing of recombination intermediates, plays a role in repairing DNA breaks. Stimulates the branch migration of RecA-mediated strand transfer reactions, allowing the 3' invading strand to extend heteroduplex DNA faster. Binds ssDNA in the presence of ADP but not other nucleotides, has ATPase activity that is stimulated by ssDNA and various branched DNA structu…	K04485	radA, sms; DNA repair protein RadA/Sms		DNA repair and recombination proteins	Protein families: genetic information processing	Brite Hierarchies	PF18073	Rubredoxin metal binding domain
257sh-1	chromosome	chromosome:1	EXE55_RS04320	uracil-DNA glycosylase	4	F:GO:0004844; F:GO:0046872; F:GO:0051536; F:GO:0051539	F:uracil DNA N-glycosylase activity; F:metal ion binding; F:iron-sulfur cluster binding; F:4 iron, 4 sulfur cluster binding	COG1573@1|root,COG1573@2|Bacteria,1MWX1@1224|Proteobacteria,2VPZQ@28216|Betaproteobacteria,1K1QM@119060|Burkholderiaceae	L	TIGRFAM phage SPO1 DNA polymerase-related protein	K21929	udg; uracil-DNA glycosylase	[EC:3.2.2.27]	DNA repair and recombination proteins	Protein families: genetic information processing	Brite Hierarchies	PF03167	Uracil DNA glycosylase superfamily
257sh-1	chromosome	chromosome:1	EXE55_RS04485	IS5 family transposase				COG3293@1|root,COG3293@2|Bacteria,1REUV@1224|Proteobacteria,1SD2K@1236|Gammaproteobacteria	L	COG3293 Transposase and inactivated derivatives							PF13340	Putative transposase of IS4/5 family (DUF4096)
257sh-1	chromosome	chromosome:1	EXE55_RS04485	IS5 family transposase				COG3293@1|root,COG3293@2|Bacteria,1REUV@1224|Proteobacteria,1SD2K@1236|Gammaproteobacteria	L	COG3293 Transposase and inactivated derivatives							PF01609	Transposase DDE domain
257sh-1	chromosome	chromosome:1	EXE55_RS04505	IS21 family transposase	5	P:GO:0006310; P:GO:0015074; P:GO:0032196; F:GO:0003676; F:GO:0003677	P:DNA recombination; P:DNA integration; P:transposition; F:nucleic acid binding; F:DNA binding	COG4584@1|root,COG4584@2|Bacteria,1MWIV@1224|Proteobacteria,2VH6U@28216|Betaproteobacteria,1K5SV@119060|Burkholderiaceae	L	Integrase core domain							PF13384	Homeodomain-like domain
257sh-1	chromosome	chromosome:1	EXE55_RS04505	IS21 family transposase	5	P:GO:0006310; P:GO:0015074; P:GO:0032196; F:GO:0003676; F:GO:0003677	P:DNA recombination; P:DNA integration; P:transposition; F:nucleic acid binding; F:DNA binding	COG4584@1|root,COG4584@2|Bacteria,1MWIV@1224|Proteobacteria,2VH6U@28216|Betaproteobacteria,1K5SV@119060|Burkholderiaceae	L	Integrase core domain							PF00665	Integrase core domain
257sh-1	chromosome	chromosome:1	EXE55_RS04540	IS21 family transposase	2	P:GO:0015074; F:GO:0003676	P:DNA integration; F:nucleic acid binding	COG4584@1|root,COG4584@2|Bacteria,1MU2G@1224|Proteobacteria,2VJIW@28216|Betaproteobacteria,1K2PQ@119060|Burkholderiaceae	L	PFAM Integrase catalytic region							PF00665	Integrase core domain
257sh-1	chromosome	chromosome:1	EXE55_RS04580	AAA family ATPase													PF08751	TrwC relaxase
257sh-1	chromosome	chromosome:1	EXE55_RS04615	site-specific integrase	3	P:GO:0006310; P:GO:0015074; F:GO:0003677	P:DNA recombination; P:DNA integration; F:DNA binding	COG0582@1|root,COG0582@2|Bacteria,1QJUQ@1224|Proteobacteria,2VZ71@28216|Betaproteobacteria,1K32P@119060|Burkholderiaceae	L	Belongs to the 'phage' integrase family							PF00589	Phage integrase family
257sh-1	chromosome	chromosome:1	EXE55_RS04640	DNA-3-methyladenine glycosylase 2 family protein	3	P:GO:0006281; P:GO:0006284; F:GO:0003824	P:DNA repair; P:base-excision repair; F:catalytic activity	COG0122@1|root,COG0122@2|Bacteria,1MX9C@1224|Proteobacteria,2VHMQ@28216|Betaproteobacteria,1K0UG@119060|Burkholderiaceae	L	PFAM HhH-GPD family protein	K01247	alkA; DNA-3-methyladenine glycosylase II	[EC:3.2.2.21]	DNA repair and recombination proteins	Protein families: genetic information processing	Brite Hierarchies	PF00730	HhH-GPD superfamily base excision DNA repair protein
257sh-1	chromosome	chromosome:1	EXE55_RS04735	DNA mismatch repair protein MutS	8	P:GO:0006281; P:GO:0006298; P:GO:0006974; F:GO:0000166; F:GO:0003677; F:GO:0003684; F:GO:0005524; F:GO:0030983	P:DNA repair; P:mismatch repair; P:cellular response to DNA damage stimulus; F:nucleotide binding; F:DNA binding; F:damaged DNA binding; F:ATP binding; F:mismatched DNA binding	COG0249@1|root,COG0249@2|Bacteria,1MUGX@1224|Proteobacteria,2VI3Z@28216|Betaproteobacteria,1K04K@119060|Burkholderiaceae	L	that it carries out the mismatch recognition step. This protein has a weak ATPase activity	K03555	mutS; DNA mismatch repair protein MutS		DNA repair and recombination proteins	Protein families: genetic information processing	Brite Hierarchies	PF05190	MutS family domain IV
257sh-1	chromosome	chromosome:1	EXE55_RS04735	DNA mismatch repair protein MutS	8	P:GO:0006281; P:GO:0006298; P:GO:0006974; F:GO:0000166; F:GO:0003677; F:GO:0003684; F:GO:0005524; F:GO:0030983	P:DNA repair; P:mismatch repair; P:cellular response to DNA damage stimulus; F:nucleotide binding; F:DNA binding; F:damaged DNA binding; F:ATP binding; F:mismatched DNA binding	COG0249@1|root,COG0249@2|Bacteria,1MUGX@1224|Proteobacteria,2VI3Z@28216|Betaproteobacteria,1K04K@119060|Burkholderiaceae	L	that it carries out the mismatch recognition step. This protein has a weak ATPase activity	K03555	mutS; DNA mismatch repair protein MutS		DNA repair and recombination proteins	Protein families: genetic information processing	Brite Hierarchies	PF05188	MutS domain II
257sh-1	chromosome	chromosome:1	EXE55_RS04735	DNA mismatch repair protein MutS	8	P:GO:0006281; P:GO:0006298; P:GO:0006974; F:GO:0000166; F:GO:0003677; F:GO:0003684; F:GO:0005524; F:GO:0030983	P:DNA repair; P:mismatch repair; P:cellular response to DNA damage stimulus; F:nucleotide binding; F:DNA binding; F:damaged DNA binding; F:ATP binding; F:mismatched DNA binding	COG0249@1|root,COG0249@2|Bacteria,1MUGX@1224|Proteobacteria,2VI3Z@28216|Betaproteobacteria,1K04K@119060|Burkholderiaceae	L	that it carries out the mismatch recognition step. This protein has a weak ATPase activity	K03555	mutS; DNA mismatch repair protein MutS		DNA repair and recombination proteins	Protein families: genetic information processing	Brite Hierarchies	PF05192	MutS domain III
257sh-1	chromosome	chromosome:1	EXE55_RS04735	DNA mismatch repair protein MutS	8	P:GO:0006281; P:GO:0006298; P:GO:0006974; F:GO:0000166; F:GO:0003677; F:GO:0003684; F:GO:0005524; F:GO:0030983	P:DNA repair; P:mismatch repair; P:cellular response to DNA damage stimulus; F:nucleotide binding; F:DNA binding; F:damaged DNA binding; F:ATP binding; F:mismatched DNA binding	COG0249@1|root,COG0249@2|Bacteria,1MUGX@1224|Proteobacteria,2VI3Z@28216|Betaproteobacteria,1K04K@119060|Burkholderiaceae	L	that it carries out the mismatch recognition step. This protein has a weak ATPase activity	K03555	mutS; DNA mismatch repair protein MutS		DNA repair and recombination proteins	Protein families: genetic information processing	Brite Hierarchies	PF00488	MutS domain V
257sh-1	chromosome	chromosome:1	EXE55_RS04735	DNA mismatch repair protein MutS	8	P:GO:0006281; P:GO:0006298; P:GO:0006974; F:GO:0000166; F:GO:0003677; F:GO:0003684; F:GO:0005524; F:GO:0030983	P:DNA repair; P:mismatch repair; P:cellular response to DNA damage stimulus; F:nucleotide binding; F:DNA binding; F:damaged DNA binding; F:ATP binding; F:mismatched DNA binding	COG0249@1|root,COG0249@2|Bacteria,1MUGX@1224|Proteobacteria,2VI3Z@28216|Betaproteobacteria,1K04K@119060|Burkholderiaceae	L	that it carries out the mismatch recognition step. This protein has a weak ATPase activity	K03555	mutS; DNA mismatch repair protein MutS		DNA repair and recombination proteins	Protein families: genetic information processing	Brite Hierarchies	PF01624	MutS domain I
257sh-1	chromosome	chromosome:1	EXE55_RS04790	threonylcarbamoyl-AMP synthase	1	F:GO:0003725	F:double-stranded RNA binding	COG0009@1|root,COG0009@2|Bacteria,1MVPM@1224|Proteobacteria,2VH4T@28216|Betaproteobacteria,1K19Y@119060|Burkholderiaceae	J	Belongs to the SUA5 family							PF01300	Telomere recombination
257sh-1	chromosome	chromosome:1	EXE55_RS04875	single-stranded-DNA-specific exonuclease RecJ	8	P:GO:0006281; P:GO:0006310; P:GO:0090305; F:GO:0003676; F:GO:0004518; F:GO:0004527; F:GO:0008409; F:GO:0016787	P:DNA repair; P:DNA recombination; P:nucleic acid phosphodiester bond hydrolysis; F:nucleic acid binding; F:nuclease activity; F:exonuclease activity; F:5'-3' exonuclease activity; F:hydrolase activity	COG0608@1|root,COG0608@2|Bacteria,1MU1M@1224|Proteobacteria,2VIGF@28216|Betaproteobacteria,1K24G@119060|Burkholderiaceae	L	single-stranded-DNA-specific exonuclease RecJ	K07462	recJ; single-stranded-DNA-specific exonuclease	[EC:3.1.-.-]	Base excision repair	Replication and repair	Genetic Information Processing	PF01368	DHH family
257sh-1	chromosome	chromosome:1	EXE55_RS04875	single-stranded-DNA-specific exonuclease RecJ	8	P:GO:0006281; P:GO:0006310; P:GO:0090305; F:GO:0003676; F:GO:0004518; F:GO:0004527; F:GO:0008409; F:GO:0016787	P:DNA repair; P:DNA recombination; P:nucleic acid phosphodiester bond hydrolysis; F:nucleic acid binding; F:nuclease activity; F:exonuclease activity; F:5'-3' exonuclease activity; F:hydrolase activity	COG0608@1|root,COG0608@2|Bacteria,1MU1M@1224|Proteobacteria,2VIGF@28216|Betaproteobacteria,1K24G@119060|Burkholderiaceae	L	single-stranded-DNA-specific exonuclease RecJ	K07462	recJ; single-stranded-DNA-specific exonuclease	[EC:3.1.-.-]	Base excision repair	Replication and repair	Genetic Information Processing	PF02272	DHHA1 domain
257sh-1	chromosome	chromosome:1	EXE55_RS04875	single-stranded-DNA-specific exonuclease RecJ	8	P:GO:0006281; P:GO:0006310; P:GO:0090305; F:GO:0003676; F:GO:0004518; F:GO:0004527; F:GO:0008409; F:GO:0016787	P:DNA repair; P:DNA recombination; P:nucleic acid phosphodiester bond hydrolysis; F:nucleic acid binding; F:nuclease activity; F:exonuclease activity; F:5'-3' exonuclease activity; F:hydrolase activity	COG0608@1|root,COG0608@2|Bacteria,1MU1M@1224|Proteobacteria,2VIGF@28216|Betaproteobacteria,1K24G@119060|Burkholderiaceae	L	single-stranded-DNA-specific exonuclease RecJ	K07462	recJ; single-stranded-DNA-specific exonuclease	[EC:3.1.-.-]	Base excision repair	Replication and repair	Genetic Information Processing	PF17768	RecJ OB domain
257sh-1	chromosome	chromosome:1	EXE55_RS04875	single-stranded-DNA-specific exonuclease RecJ	8	P:GO:0006281; P:GO:0006310; P:GO:0090305; F:GO:0003676; F:GO:0004518; F:GO:0004527; F:GO:0008409; F:GO:0016787	P:DNA repair; P:DNA recombination; P:nucleic acid phosphodiester bond hydrolysis; F:nucleic acid binding; F:nuclease activity; F:exonuclease activity; F:5'-3' exonuclease activity; F:hydrolase activity	COG0608@1|root,COG0608@2|Bacteria,1MU1M@1224|Proteobacteria,2VIGF@28216|Betaproteobacteria,1K24G@119060|Burkholderiaceae	L	single-stranded-DNA-specific exonuclease RecJ	K07462	recJ; single-stranded-DNA-specific exonuclease	[EC:3.1.-.-]	Mismatch repair	Replication and repair	Genetic Information Processing	PF01368	DHH family
257sh-1	chromosome	chromosome:1	EXE55_RS04875	single-stranded-DNA-specific exonuclease RecJ	8	P:GO:0006281; P:GO:0006310; P:GO:0090305; F:GO:0003676; F:GO:0004518; F:GO:0004527; F:GO:0008409; F:GO:0016787	P:DNA repair; P:DNA recombination; P:nucleic acid phosphodiester bond hydrolysis; F:nucleic acid binding; F:nuclease activity; F:exonuclease activity; F:5'-3' exonuclease activity; F:hydrolase activity	COG0608@1|root,COG0608@2|Bacteria,1MU1M@1224|Proteobacteria,2VIGF@28216|Betaproteobacteria,1K24G@119060|Burkholderiaceae	L	single-stranded-DNA-specific exonuclease RecJ	K07462	recJ; single-stranded-DNA-specific exonuclease	[EC:3.1.-.-]	Mismatch repair	Replication and repair	Genetic Information Processing	PF02272	DHHA1 domain
257sh-1	chromosome	chromosome:1	EXE55_RS04875	single-stranded-DNA-specific exonuclease RecJ	8	P:GO:0006281; P:GO:0006310; P:GO:0090305; F:GO:0003676; F:GO:0004518; F:GO:0004527; F:GO:0008409; F:GO:0016787	P:DNA repair; P:DNA recombination; P:nucleic acid phosphodiester bond hydrolysis; F:nucleic acid binding; F:nuclease activity; F:exonuclease activity; F:5'-3' exonuclease activity; F:hydrolase activity	COG0608@1|root,COG0608@2|Bacteria,1MU1M@1224|Proteobacteria,2VIGF@28216|Betaproteobacteria,1K24G@119060|Burkholderiaceae	L	single-stranded-DNA-specific exonuclease RecJ	K07462	recJ; single-stranded-DNA-specific exonuclease	[EC:3.1.-.-]	Mismatch repair	Replication and repair	Genetic Information Processing	PF17768	RecJ OB domain
257sh-1	chromosome	chromosome:1	EXE55_RS04875	single-stranded-DNA-specific exonuclease RecJ	8	P:GO:0006281; P:GO:0006310; P:GO:0090305; F:GO:0003676; F:GO:0004518; F:GO:0004527; F:GO:0008409; F:GO:0016787	P:DNA repair; P:DNA recombination; P:nucleic acid phosphodiester bond hydrolysis; F:nucleic acid binding; F:nuclease activity; F:exonuclease activity; F:5'-3' exonuclease activity; F:hydrolase activity	COG0608@1|root,COG0608@2|Bacteria,1MU1M@1224|Proteobacteria,2VIGF@28216|Betaproteobacteria,1K24G@119060|Burkholderiaceae	L	single-stranded-DNA-specific exonuclease RecJ	K07462	recJ; single-stranded-DNA-specific exonuclease	[EC:3.1.-.-]	Homologous recombination	Replication and repair	Genetic Information Processing	PF01368	DHH family
257sh-1	chromosome	chromosome:1	EXE55_RS04875	single-stranded-DNA-specific exonuclease RecJ	8	P:GO:0006281; P:GO:0006310; P:GO:0090305; F:GO:0003676; F:GO:0004518; F:GO:0004527; F:GO:0008409; F:GO:0016787	P:DNA repair; P:DNA recombination; P:nucleic acid phosphodiester bond hydrolysis; F:nucleic acid binding; F:nuclease activity; F:exonuclease activity; F:5'-3' exonuclease activity; F:hydrolase activity	COG0608@1|root,COG0608@2|Bacteria,1MU1M@1224|Proteobacteria,2VIGF@28216|Betaproteobacteria,1K24G@119060|Burkholderiaceae	L	single-stranded-DNA-specific exonuclease RecJ	K07462	recJ; single-stranded-DNA-specific exonuclease	[EC:3.1.-.-]	Homologous recombination	Replication and repair	Genetic Information Processing	PF02272	DHHA1 domain
257sh-1	chromosome	chromosome:1	EXE55_RS04875	single-stranded-DNA-specific exonuclease RecJ	8	P:GO:0006281; P:GO:0006310; P:GO:0090305; F:GO:0003676; F:GO:0004518; F:GO:0004527; F:GO:0008409; F:GO:0016787	P:DNA repair; P:DNA recombination; P:nucleic acid phosphodiester bond hydrolysis; F:nucleic acid binding; F:nuclease activity; F:exonuclease activity; F:5'-3' exonuclease activity; F:hydrolase activity	COG0608@1|root,COG0608@2|Bacteria,1MU1M@1224|Proteobacteria,2VIGF@28216|Betaproteobacteria,1K24G@119060|Burkholderiaceae	L	single-stranded-DNA-specific exonuclease RecJ	K07462	recJ; single-stranded-DNA-specific exonuclease	[EC:3.1.-.-]	Homologous recombination	Replication and repair	Genetic Information Processing	PF17768	RecJ OB domain
257sh-1	chromosome	chromosome:1	EXE55_RS04875	single-stranded-DNA-specific exonuclease RecJ	8	P:GO:0006281; P:GO:0006310; P:GO:0090305; F:GO:0003676; F:GO:0004518; F:GO:0004527; F:GO:0008409; F:GO:0016787	P:DNA repair; P:DNA recombination; P:nucleic acid phosphodiester bond hydrolysis; F:nucleic acid binding; F:nuclease activity; F:exonuclease activity; F:5'-3' exonuclease activity; F:hydrolase activity	COG0608@1|root,COG0608@2|Bacteria,1MU1M@1224|Proteobacteria,2VIGF@28216|Betaproteobacteria,1K24G@119060|Burkholderiaceae	L	single-stranded-DNA-specific exonuclease RecJ	K07462	recJ; single-stranded-DNA-specific exonuclease	[EC:3.1.-.-]	DNA repair and recombination proteins	Protein families: genetic information processing	Brite Hierarchies	PF01368	DHH family
257sh-1	chromosome	chromosome:1	EXE55_RS04875	single-stranded-DNA-specific exonuclease RecJ	8	P:GO:0006281; P:GO:0006310; P:GO:0090305; F:GO:0003676; F:GO:0004518; F:GO:0004527; F:GO:0008409; F:GO:0016787	P:DNA repair; P:DNA recombination; P:nucleic acid phosphodiester bond hydrolysis; F:nucleic acid binding; F:nuclease activity; F:exonuclease activity; F:5'-3' exonuclease activity; F:hydrolase activity	COG0608@1|root,COG0608@2|Bacteria,1MU1M@1224|Proteobacteria,2VIGF@28216|Betaproteobacteria,1K24G@119060|Burkholderiaceae	L	single-stranded-DNA-specific exonuclease RecJ	K07462	recJ; single-stranded-DNA-specific exonuclease	[EC:3.1.-.-]	DNA repair and recombination proteins	Protein families: genetic information processing	Brite Hierarchies	PF02272	DHHA1 domain
257sh-1	chromosome	chromosome:1	EXE55_RS04875	single-stranded-DNA-specific exonuclease RecJ	8	P:GO:0006281; P:GO:0006310; P:GO:0090305; F:GO:0003676; F:GO:0004518; F:GO:0004527; F:GO:0008409; F:GO:0016787	P:DNA repair; P:DNA recombination; P:nucleic acid phosphodiester bond hydrolysis; F:nucleic acid binding; F:nuclease activity; F:exonuclease activity; F:5'-3' exonuclease activity; F:hydrolase activity	COG0608@1|root,COG0608@2|Bacteria,1MU1M@1224|Proteobacteria,2VIGF@28216|Betaproteobacteria,1K24G@119060|Burkholderiaceae	L	single-stranded-DNA-specific exonuclease RecJ	K07462	recJ; single-stranded-DNA-specific exonuclease	[EC:3.1.-.-]	DNA repair and recombination proteins	Protein families: genetic information processing	Brite Hierarchies	PF17768	RecJ OB domain
257sh-1	chromosome	chromosome:1	EXE55_RS05055	IS481 family transposase	2	P:GO:0015074; F:GO:0003676	P:DNA integration; F:nucleic acid binding	COG2801@1|root,COG2801@2|Bacteria,1MZ45@1224|Proteobacteria,2VNA0@28216|Betaproteobacteria,1K69X@119060|Burkholderiaceae	L	Integrase core domain							PF13683	Integrase core domain
257sh-1	chromosome	chromosome:1	EXE55_RS05055	IS481 family transposase	2	P:GO:0015074; F:GO:0003676	P:DNA integration; F:nucleic acid binding	COG2801@1|root,COG2801@2|Bacteria,1MZ45@1224|Proteobacteria,2VNA0@28216|Betaproteobacteria,1K69X@119060|Burkholderiaceae	L	Integrase core domain							PF13551	Winged helix-turn helix
257sh-1	chromosome	chromosome:1	EXE55_RS05115	exodeoxyribonuclease III	8	P:GO:0006281; P:GO:0090305; F:GO:0003677; F:GO:0003824; F:GO:0004518; F:GO:0004519; F:GO:0008853; F:GO:0016787	P:DNA repair; P:nucleic acid phosphodiester bond hydrolysis; F:DNA binding; F:catalytic activity; F:nuclease activity; F:endonuclease activity; F:exodeoxyribonuclease III activity; F:hydrolase activity	COG0708@1|root,COG0708@2|Bacteria,1MVII@1224|Proteobacteria,2VH7N@28216|Betaproteobacteria,1JZSV@119060|Burkholderiaceae	L	Exodeoxyribonuclease III	K01142	E3.1.11.2, xthA; exodeoxyribonuclease III	[EC:3.1.11.2]	DNA repair and recombination proteins	Protein families: genetic information processing	Brite Hierarchies	PF03372	Endonuclease/Exonuclease/phosphatase family
257sh-1	chromosome	chromosome:1	EXE55_RS05185	site-specific integrase				COG0582@1|root,COG0582@2|Bacteria,1NWGS@1224|Proteobacteria,2VKWM@28216|Betaproteobacteria,1K4RQ@119060|Burkholderiaceae	L	Belongs to the 'phage' integrase family							PF00589	Phage integrase family
257sh-1	chromosome	chromosome:1	EXE55_RS05195	mobilization protein				2E8NX@1|root,32HF5@2|Bacteria,1Q1DY@1224|Proteobacteria,2W49Y@28216|Betaproteobacteria,1KE8K@119060|Burkholderiaceae	-	-
257sh-1	chromosome	chromosome:1	EXE55_RS05215	IS21 family transposase	2	P:GO:0015074; F:GO:0003676	P:DNA integration; F:nucleic acid binding	COG4584@1|root,COG4584@2|Bacteria,1MU2G@1224|Proteobacteria,2VJIW@28216|Betaproteobacteria,1K2PQ@119060|Burkholderiaceae	L	PFAM Integrase catalytic region							PF00665	Integrase core domain
257sh-1	chromosome	chromosome:1	EXE55_RS05345	DNA photolyase family protein	8	P:GO:0006139; P:GO:0006950; P:GO:0018298; P:GO:0051716; F:GO:0003904; F:GO:0016829; F:GO:0097159; F:GO:1901363	P:nucleobase-containing compound metabolic process; P:response to stress; P:protein-chromophore linkage; P:cellular response to stimulus; F:deoxyribodipyrimidine photo-lyase activity; F:lyase activity; F:organic cyclic compound binding; F:heterocyclic compound binding	COG0415@1|root,COG0415@2|Bacteria,1MV9Y@1224|Proteobacteria,2VITS@28216|Betaproteobacteria,1K2ZA@119060|Burkholderiaceae	L	DNA photolyase	K01669	phrB; deoxyribodipyrimidine photo-lyase	[EC:4.1.99.3]	DNA repair and recombination proteins	Protein families: genetic information processing	Brite Hierarchies	PF03441	FAD binding domain of DNA photolyase
257sh-1	chromosome	chromosome:1	EXE55_RS05345	DNA photolyase family protein	8	P:GO:0006139; P:GO:0006950; P:GO:0018298; P:GO:0051716; F:GO:0003904; F:GO:0016829; F:GO:0097159; F:GO:1901363	P:nucleobase-containing compound metabolic process; P:response to stress; P:protein-chromophore linkage; P:cellular response to stimulus; F:deoxyribodipyrimidine photo-lyase activity; F:lyase activity; F:organic cyclic compound binding; F:heterocyclic compound binding	COG0415@1|root,COG0415@2|Bacteria,1MV9Y@1224|Proteobacteria,2VITS@28216|Betaproteobacteria,1K2ZA@119060|Burkholderiaceae	L	DNA photolyase	K01669	phrB; deoxyribodipyrimidine photo-lyase	[EC:4.1.99.3]	DNA repair and recombination proteins	Protein families: genetic information processing	Brite Hierarchies	PF00875	DNA photolyase
257sh-1	chromosome	chromosome:1	EXE55_RS05375	IS5 family transposase	2	C:GO:0016020; C:GO:0016021	C:membrane; C:integral component of membrane	COG3039@1|root,COG3039@2|Bacteria,1MUVI@1224|Proteobacteria,2VK9J@28216|Betaproteobacteria,1K4IS@119060|Burkholderiaceae	L	Product type h extrachromosomal origin							PF05598	Transposase domain (DUF772)
257sh-1	chromosome	chromosome:1	EXE55_RS05375	IS5 family transposase	2	C:GO:0016020; C:GO:0016021	C:membrane; C:integral component of membrane	COG3039@1|root,COG3039@2|Bacteria,1MUVI@1224|Proteobacteria,2VK9J@28216|Betaproteobacteria,1K4IS@119060|Burkholderiaceae	L	Product type h extrachromosomal origin							PF01609	Transposase DDE domain
257sh-1	chromosome	chromosome:1	EXE55_RS05525	excinuclease ABC subunit UvrB	14	P:GO:0006281; P:GO:0006289; P:GO:0006974; P:GO:0009432; P:GO:0090305; F:GO:0000166; F:GO:0003677; F:GO:0004518; F:GO:0005524; F:GO:0009381; F:GO:0016787; F:GO:0016887; C:GO:0005737; C:GO:0009380	P:DNA repair; P:nucleotide-excision repair; P:cellular response to DNA damage stimulus; P:SOS response; P:nucleic acid phosphodiester bond hydrolysis; F:nucleotide binding; F:DNA binding; F:nuclease activity; F:ATP binding; F:excinuclease ABC activity; F:hydrolase activity; F:ATP hydrolysis activity; C:cytoplasm; C:excinuclease repair complex	COG0556@1|root,COG0556@2|Bacteria,1MUFK@1224|Proteobacteria,2VHFQ@28216|Betaproteobacteria,1K3H7@119060|Burkholderiaceae	L	damaged site, the DNA wraps around one UvrB monomer. DNA wrap is dependent on ATP binding by UvrB and probably causes local melting of the DNA helix, facilitating insertion of UvrB beta-hairpin between the DNA strands. Then UvrB probes one DNA strand for the presence of a lesion. If a lesion is found the UvrA subunits dissociate and the UvrB-DNA preincision complex is formed. This complex is subs…	K03702	uvrB; excinuclease ABC subunit B		DNA repair and recombination proteins	Protein families: genetic information processing	Brite Hierarchies	PF12344	Ultra-violet resistance protein B
257sh-1	chromosome	chromosome:1	EXE55_RS05525	excinuclease ABC subunit UvrB	14	P:GO:0006281; P:GO:0006289; P:GO:0006974; P:GO:0009432; P:GO:0090305; F:GO:0000166; F:GO:0003677; F:GO:0004518; F:GO:0005524; F:GO:0009381; F:GO:0016787; F:GO:0016887; C:GO:0005737; C:GO:0009380	P:DNA repair; P:nucleotide-excision repair; P:cellular response to DNA damage stimulus; P:SOS response; P:nucleic acid phosphodiester bond hydrolysis; F:nucleotide binding; F:DNA binding; F:nuclease activity; F:ATP binding; F:excinuclease ABC activity; F:hydrolase activity; F:ATP hydrolysis activity; C:cytoplasm; C:excinuclease repair complex	COG0556@1|root,COG0556@2|Bacteria,1MUFK@1224|Proteobacteria,2VHFQ@28216|Betaproteobacteria,1K3H7@119060|Burkholderiaceae	L	damaged site, the DNA wraps around one UvrB monomer. DNA wrap is dependent on ATP binding by UvrB and probably causes local melting of the DNA helix, facilitating insertion of UvrB beta-hairpin between the DNA strands. Then UvrB probes one DNA strand for the presence of a lesion. If a lesion is found the UvrA subunits dissociate and the UvrB-DNA preincision complex is formed. This complex is subs…	K03702	uvrB; excinuclease ABC subunit B		DNA repair and recombination proteins	Protein families: genetic information processing	Brite Hierarchies	PF02151	UvrB/uvrC motif
257sh-1	chromosome	chromosome:1	EXE55_RS05525	excinuclease ABC subunit UvrB	14	P:GO:0006281; P:GO:0006289; P:GO:0006974; P:GO:0009432; P:GO:0090305; F:GO:0000166; F:GO:0003677; F:GO:0004518; F:GO:0005524; F:GO:0009381; F:GO:0016787; F:GO:0016887; C:GO:0005737; C:GO:0009380	P:DNA repair; P:nucleotide-excision repair; P:cellular response to DNA damage stimulus; P:SOS response; P:nucleic acid phosphodiester bond hydrolysis; F:nucleotide binding; F:DNA binding; F:nuclease activity; F:ATP binding; F:excinuclease ABC activity; F:hydrolase activity; F:ATP hydrolysis activity; C:cytoplasm; C:excinuclease repair complex	COG0556@1|root,COG0556@2|Bacteria,1MUFK@1224|Proteobacteria,2VHFQ@28216|Betaproteobacteria,1K3H7@119060|Burkholderiaceae	L	damaged site, the DNA wraps around one UvrB monomer. DNA wrap is dependent on ATP binding by UvrB and probably causes local melting of the DNA helix, facilitating insertion of UvrB beta-hairpin between the DNA strands. Then UvrB probes one DNA strand for the presence of a lesion. If a lesion is found the UvrA subunits dissociate and the UvrB-DNA preincision complex is formed. This complex is subs…	K03702	uvrB; excinuclease ABC subunit B		DNA repair and recombination proteins	Protein families: genetic information processing	Brite Hierarchies	PF00271	Helicase conserved C-terminal domain
257sh-1	chromosome	chromosome:1	EXE55_RS05525	excinuclease ABC subunit UvrB	14	P:GO:0006281; P:GO:0006289; P:GO:0006974; P:GO:0009432; P:GO:0090305; F:GO:0000166; F:GO:0003677; F:GO:0004518; F:GO:0005524; F:GO:0009381; F:GO:0016787; F:GO:0016887; C:GO:0005737; C:GO:0009380	P:DNA repair; P:nucleotide-excision repair; P:cellular response to DNA damage stimulus; P:SOS response; P:nucleic acid phosphodiester bond hydrolysis; F:nucleotide binding; F:DNA binding; F:nuclease activity; F:ATP binding; F:excinuclease ABC activity; F:hydrolase activity; F:ATP hydrolysis activity; C:cytoplasm; C:excinuclease repair complex	COG0556@1|root,COG0556@2|Bacteria,1MUFK@1224|Proteobacteria,2VHFQ@28216|Betaproteobacteria,1K3H7@119060|Burkholderiaceae	L	damaged site, the DNA wraps around one UvrB monomer. DNA wrap is dependent on ATP binding by UvrB and probably causes local melting of the DNA helix, facilitating insertion of UvrB beta-hairpin between the DNA strands. Then UvrB probes one DNA strand for the presence of a lesion. If a lesion is found the UvrA subunits dissociate and the UvrB-DNA preincision complex is formed. This complex is subs…	K03702	uvrB; excinuclease ABC subunit B		DNA repair and recombination proteins	Protein families: genetic information processing	Brite Hierarchies	PF17757	UvrB interaction domain
257sh-1	chromosome	chromosome:1	EXE55_RS05525	excinuclease ABC subunit UvrB	14	P:GO:0006281; P:GO:0006289; P:GO:0006974; P:GO:0009432; P:GO:0090305; F:GO:0000166; F:GO:0003677; F:GO:0004518; F:GO:0005524; F:GO:0009381; F:GO:0016787; F:GO:0016887; C:GO:0005737; C:GO:0009380	P:DNA repair; P:nucleotide-excision repair; P:cellular response to DNA damage stimulus; P:SOS response; P:nucleic acid phosphodiester bond hydrolysis; F:nucleotide binding; F:DNA binding; F:nuclease activity; F:ATP binding; F:excinuclease ABC activity; F:hydrolase activity; F:ATP hydrolysis activity; C:cytoplasm; C:excinuclease repair complex	COG0556@1|root,COG0556@2|Bacteria,1MUFK@1224|Proteobacteria,2VHFQ@28216|Betaproteobacteria,1K3H7@119060|Burkholderiaceae	L	damaged site, the DNA wraps around one UvrB monomer. DNA wrap is dependent on ATP binding by UvrB and probably causes local melting of the DNA helix, facilitating insertion of UvrB beta-hairpin between the DNA strands. Then UvrB probes one DNA strand for the presence of a lesion. If a lesion is found the UvrA subunits dissociate and the UvrB-DNA preincision complex is formed. This complex is subs…	K03702	uvrB; excinuclease ABC subunit B		DNA repair and recombination proteins	Protein families: genetic information processing	Brite Hierarchies	PF04851	Type III restriction enzyme, res subunit
257sh-1	chromosome	chromosome:1	EXE55_RS05555	IS3 family transposase	5	P:GO:0006313; P:GO:0015074; F:GO:0003676; F:GO:0003677; F:GO:0004803	P:transposition, DNA-mediated; P:DNA integration; F:nucleic acid binding; F:DNA binding; F:transposase activity	COG2801@1|root,COG2963@1|root,COG2801@2|Bacteria,COG2963@2|Bacteria,1MY62@1224|Proteobacteria,2VJAF@28216|Betaproteobacteria,1K2XD@119060|Burkholderiaceae	L	transposase	K07497	K07497; putative transposase		Replication and repair	Unclassified: genetic information processing	Not Included in Pathway or Brite	PF01527	Transposase
257sh-1	chromosome	chromosome:1	EXE55_RS05555	IS3 family transposase	5	P:GO:0006313; P:GO:0015074; F:GO:0003676; F:GO:0003677; F:GO:0004803	P:transposition, DNA-mediated; P:DNA integration; F:nucleic acid binding; F:DNA binding; F:transposase activity	COG2801@1|root,COG2963@1|root,COG2801@2|Bacteria,COG2963@2|Bacteria,1MY62@1224|Proteobacteria,2VJAF@28216|Betaproteobacteria,1K2XD@119060|Burkholderiaceae	L	transposase	K07497	K07497; putative transposase		Replication and repair	Unclassified: genetic information processing	Not Included in Pathway or Brite	PF13276	HTH-like domain
257sh-1	chromosome	chromosome:1	EXE55_RS05555	IS3 family transposase	5	P:GO:0006313; P:GO:0015074; F:GO:0003676; F:GO:0003677; F:GO:0004803	P:transposition, DNA-mediated; P:DNA integration; F:nucleic acid binding; F:DNA binding; F:transposase activity	COG2801@1|root,COG2963@1|root,COG2801@2|Bacteria,COG2963@2|Bacteria,1MY62@1224|Proteobacteria,2VJAF@28216|Betaproteobacteria,1K2XD@119060|Burkholderiaceae	L	transposase	K07497	K07497; putative transposase		Replication and repair	Unclassified: genetic information processing	Not Included in Pathway or Brite	PF00665	Integrase core domain
257sh-1	chromosome	chromosome:1	EXE55_RS06060	DNA polymerase III subunit alpha	14	P:GO:0006260; P:GO:0006412; P:GO:0071897; P:GO:0090305; F:GO:0003676; F:GO:0003824; F:GO:0003887; F:GO:0004812; F:GO:0005524; F:GO:0008408; F:GO:0016740; F:GO:0016779; F:GO:0016874; C:GO:0005737	P:DNA replication; P:translation; P:DNA biosynthetic process; P:nucleic acid phosphodiester bond hydrolysis; F:nucleic acid binding; F:catalytic activity; F:DNA-directed DNA polymerase activity; F:aminoacyl-tRNA ligase activity; F:ATP binding; F:3'-5' exonuclease activity; F:transferase activity; F:nucleotidyltransferase activity; F:ligase activity; C:cytoplasm	COG0587@1|root,COG0587@2|Bacteria,1MUIF@1224|Proteobacteria,2VH3F@28216|Betaproteobacteria,1K1A9@119060|Burkholderiaceae	L	DNA polymerase	K02337	dnaE; DNA polymerase III subunit alpha	[EC:2.7.7.7]	Homologous recombination	Replication and repair	Genetic Information Processing	PF02811	PHP domain
257sh-1	chromosome	chromosome:1	EXE55_RS06060	DNA polymerase III subunit alpha	14	P:GO:0006260; P:GO:0006412; P:GO:0071897; P:GO:0090305; F:GO:0003676; F:GO:0003824; F:GO:0003887; F:GO:0004812; F:GO:0005524; F:GO:0008408; F:GO:0016740; F:GO:0016779; F:GO:0016874; C:GO:0005737	P:DNA replication; P:translation; P:DNA biosynthetic process; P:nucleic acid phosphodiester bond hydrolysis; F:nucleic acid binding; F:catalytic activity; F:DNA-directed DNA polymerase activity; F:aminoacyl-tRNA ligase activity; F:ATP binding; F:3'-5' exonuclease activity; F:transferase activity; F:nucleotidyltransferase activity; F:ligase activity; C:cytoplasm	COG0587@1|root,COG0587@2|Bacteria,1MUIF@1224|Proteobacteria,2VH3F@28216|Betaproteobacteria,1K1A9@119060|Burkholderiaceae	L	DNA polymerase	K02337	dnaE; DNA polymerase III subunit alpha	[EC:2.7.7.7]	Homologous recombination	Replication and repair	Genetic Information Processing	PF17657	Bacterial DNA polymerase III alpha subunit finger domain
257sh-1	chromosome	chromosome:1	EXE55_RS06060	DNA polymerase III subunit alpha	14	P:GO:0006260; P:GO:0006412; P:GO:0071897; P:GO:0090305; F:GO:0003676; F:GO:0003824; F:GO:0003887; F:GO:0004812; F:GO:0005524; F:GO:0008408; F:GO:0016740; F:GO:0016779; F:GO:0016874; C:GO:0005737	P:DNA replication; P:translation; P:DNA biosynthetic process; P:nucleic acid phosphodiester bond hydrolysis; F:nucleic acid binding; F:catalytic activity; F:DNA-directed DNA polymerase activity; F:aminoacyl-tRNA ligase activity; F:ATP binding; F:3'-5' exonuclease activity; F:transferase activity; F:nucleotidyltransferase activity; F:ligase activity; C:cytoplasm	COG0587@1|root,COG0587@2|Bacteria,1MUIF@1224|Proteobacteria,2VH3F@28216|Betaproteobacteria,1K1A9@119060|Burkholderiaceae	L	DNA polymerase	K02337	dnaE; DNA polymerase III subunit alpha	[EC:2.7.7.7]	Homologous recombination	Replication and repair	Genetic Information Processing	PF07733	Bacterial DNA polymerase III alpha NTPase domain
257sh-1	chromosome	chromosome:1	EXE55_RS06060	DNA polymerase III subunit alpha	14	P:GO:0006260; P:GO:0006412; P:GO:0071897; P:GO:0090305; F:GO:0003676; F:GO:0003824; F:GO:0003887; F:GO:0004812; F:GO:0005524; F:GO:0008408; F:GO:0016740; F:GO:0016779; F:GO:0016874; C:GO:0005737	P:DNA replication; P:translation; P:DNA biosynthetic process; P:nucleic acid phosphodiester bond hydrolysis; F:nucleic acid binding; F:catalytic activity; F:DNA-directed DNA polymerase activity; F:aminoacyl-tRNA ligase activity; F:ATP binding; F:3'-5' exonuclease activity; F:transferase activity; F:nucleotidyltransferase activity; F:ligase activity; C:cytoplasm	COG0587@1|root,COG0587@2|Bacteria,1MUIF@1224|Proteobacteria,2VH3F@28216|Betaproteobacteria,1K1A9@119060|Burkholderiaceae	L	DNA polymerase	K02337	dnaE; DNA polymerase III subunit alpha	[EC:2.7.7.7]	Homologous recombination	Replication and repair	Genetic Information Processing	PF01336	OB-fold nucleic acid binding domain
257sh-1	chromosome	chromosome:1	EXE55_RS06060	DNA polymerase III subunit alpha	14	P:GO:0006260; P:GO:0006412; P:GO:0071897; P:GO:0090305; F:GO:0003676; F:GO:0003824; F:GO:0003887; F:GO:0004812; F:GO:0005524; F:GO:0008408; F:GO:0016740; F:GO:0016779; F:GO:0016874; C:GO:0005737	P:DNA replication; P:translation; P:DNA biosynthetic process; P:nucleic acid phosphodiester bond hydrolysis; F:nucleic acid binding; F:catalytic activity; F:DNA-directed DNA polymerase activity; F:aminoacyl-tRNA ligase activity; F:ATP binding; F:3'-5' exonuclease activity; F:transferase activity; F:nucleotidyltransferase activity; F:ligase activity; C:cytoplasm	COG0587@1|root,COG0587@2|Bacteria,1MUIF@1224|Proteobacteria,2VH3F@28216|Betaproteobacteria,1K1A9@119060|Burkholderiaceae	L	DNA polymerase	K02337	dnaE; DNA polymerase III subunit alpha	[EC:2.7.7.7]	Homologous recombination	Replication and repair	Genetic Information Processing	PF14579	Helix-hairpin-helix motif
257sh-1	chromosome	chromosome:1	EXE55_RS06060	DNA polymerase III subunit alpha	14	P:GO:0006260; P:GO:0006412; P:GO:0071897; P:GO:0090305; F:GO:0003676; F:GO:0003824; F:GO:0003887; F:GO:0004812; F:GO:0005524; F:GO:0008408; F:GO:0016740; F:GO:0016779; F:GO:0016874; C:GO:0005737	P:DNA replication; P:translation; P:DNA biosynthetic process; P:nucleic acid phosphodiester bond hydrolysis; F:nucleic acid binding; F:catalytic activity; F:DNA-directed DNA polymerase activity; F:aminoacyl-tRNA ligase activity; F:ATP binding; F:3'-5' exonuclease activity; F:transferase activity; F:nucleotidyltransferase activity; F:ligase activity; C:cytoplasm	COG0587@1|root,COG0587@2|Bacteria,1MUIF@1224|Proteobacteria,2VH3F@28216|Betaproteobacteria,1K1A9@119060|Burkholderiaceae	L	DNA polymerase	K02337	dnaE; DNA polymerase III subunit alpha	[EC:2.7.7.7]	DNA repair and recombination proteins	Protein families: genetic information processing	Brite Hierarchies	PF02811	PHP domain
257sh-1	chromosome	chromosome:1	EXE55_RS06060	DNA polymerase III subunit alpha	14	P:GO:0006260; P:GO:0006412; P:GO:0071897; P:GO:0090305; F:GO:0003676; F:GO:0003824; F:GO:0003887; F:GO:0004812; F:GO:0005524; F:GO:0008408; F:GO:0016740; F:GO:0016779; F:GO:0016874; C:GO:0005737	P:DNA replication; P:translation; P:DNA biosynthetic process; P:nucleic acid phosphodiester bond hydrolysis; F:nucleic acid binding; F:catalytic activity; F:DNA-directed DNA polymerase activity; F:aminoacyl-tRNA ligase activity; F:ATP binding; F:3'-5' exonuclease activity; F:transferase activity; F:nucleotidyltransferase activity; F:ligase activity; C:cytoplasm	COG0587@1|root,COG0587@2|Bacteria,1MUIF@1224|Proteobacteria,2VH3F@28216|Betaproteobacteria,1K1A9@119060|Burkholderiaceae	L	DNA polymerase	K02337	dnaE; DNA polymerase III subunit alpha	[EC:2.7.7.7]	DNA repair and recombination proteins	Protein families: genetic information processing	Brite Hierarchies	PF17657	Bacterial DNA polymerase III alpha subunit finger domain
257sh-1	chromosome	chromosome:1	EXE55_RS06060	DNA polymerase III subunit alpha	14	P:GO:0006260; P:GO:0006412; P:GO:0071897; P:GO:0090305; F:GO:0003676; F:GO:0003824; F:GO:0003887; F:GO:0004812; F:GO:0005524; F:GO:0008408; F:GO:0016740; F:GO:0016779; F:GO:0016874; C:GO:0005737	P:DNA replication; P:translation; P:DNA biosynthetic process; P:nucleic acid phosphodiester bond hydrolysis; F:nucleic acid binding; F:catalytic activity; F:DNA-directed DNA polymerase activity; F:aminoacyl-tRNA ligase activity; F:ATP binding; F:3'-5' exonuclease activity; F:transferase activity; F:nucleotidyltransferase activity; F:ligase activity; C:cytoplasm	COG0587@1|root,COG0587@2|Bacteria,1MUIF@1224|Proteobacteria,2VH3F@28216|Betaproteobacteria,1K1A9@119060|Burkholderiaceae	L	DNA polymerase	K02337	dnaE; DNA polymerase III subunit alpha	[EC:2.7.7.7]	DNA repair and recombination proteins	Protein families: genetic information processing	Brite Hierarchies	PF07733	Bacterial DNA polymerase III alpha NTPase domain
257sh-1	chromosome	chromosome:1	EXE55_RS06060	DNA polymerase III subunit alpha	14	P:GO:0006260; P:GO:0006412; P:GO:0071897; P:GO:0090305; F:GO:0003676; F:GO:0003824; F:GO:0003887; F:GO:0004812; F:GO:0005524; F:GO:0008408; F:GO:0016740; F:GO:0016779; F:GO:0016874; C:GO:0005737	P:DNA replication; P:translation; P:DNA biosynthetic process; P:nucleic acid phosphodiester bond hydrolysis; F:nucleic acid binding; F:catalytic activity; F:DNA-directed DNA polymerase activity; F:aminoacyl-tRNA ligase activity; F:ATP binding; F:3'-5' exonuclease activity; F:transferase activity; F:nucleotidyltransferase activity; F:ligase activity; C:cytoplasm	COG0587@1|root,COG0587@2|Bacteria,1MUIF@1224|Proteobacteria,2VH3F@28216|Betaproteobacteria,1K1A9@119060|Burkholderiaceae	L	DNA polymerase	K02337	dnaE; DNA polymerase III subunit alpha	[EC:2.7.7.7]	DNA repair and recombination proteins	Protein families: genetic information processing	Brite Hierarchies	PF01336	OB-fold nucleic acid binding domain
257sh-1	chromosome	chromosome:1	EXE55_RS06060	DNA polymerase III subunit alpha	14	P:GO:0006260; P:GO:0006412; P:GO:0071897; P:GO:0090305; F:GO:0003676; F:GO:0003824; F:GO:0003887; F:GO:0004812; F:GO:0005524; F:GO:0008408; F:GO:0016740; F:GO:0016779; F:GO:0016874; C:GO:0005737	P:DNA replication; P:translation; P:DNA biosynthetic process; P:nucleic acid phosphodiester bond hydrolysis; F:nucleic acid binding; F:catalytic activity; F:DNA-directed DNA polymerase activity; F:aminoacyl-tRNA ligase activity; F:ATP binding; F:3'-5' exonuclease activity; F:transferase activity; F:nucleotidyltransferase activity; F:ligase activity; C:cytoplasm	COG0587@1|root,COG0587@2|Bacteria,1MUIF@1224|Proteobacteria,2VH3F@28216|Betaproteobacteria,1K1A9@119060|Burkholderiaceae	L	DNA polymerase	K02337	dnaE; DNA polymerase III subunit alpha	[EC:2.7.7.7]	DNA repair and recombination proteins	Protein families: genetic information processing	Brite Hierarchies	PF14579	Helix-hairpin-helix motif
257sh-1	chromosome	chromosome:1	EXE55_RS06125	endonuclease III	18	P:GO:0006281; P:GO:0006284; P:GO:0006950; P:GO:0006974; P:GO:0008152; P:GO:0090305; F:GO:0003677; F:GO:0003824; F:GO:0003906; F:GO:0004519; F:GO:0016787; F:GO:0016798; F:GO:0016829; F:GO:0019104; F:GO:0046872; F:GO:0051536; F:GO:0051539; F:GO:0140078	P:DNA repair; P:base-excision repair; P:response to stress; P:cellular response to DNA damage stimulus; P:metabolic process; P:nucleic acid phosphodiester bond hydrolysis; F:DNA binding; F:catalytic activity; F:DNA-(apurinic or apyrimidinic site) endonuclease activity; F:endonuclease activity; F:hydrolase activity; F:hydrolase activity, acting on glycosyl bonds; F:lyase activity; F:DNA N-glycosyl…	COG0177@1|root,COG0177@2|Bacteria,1MUYQ@1224|Proteobacteria,2VIRB@28216|Betaproteobacteria,1K260@119060|Burkholderiaceae	L	DNA repair enzyme that has both DNA N-glycosylase activity and AP-lyase activity. The DNA N-glycosylase activity releases various damaged pyrimidines from DNA by cleaving the N- glycosidic bond, leaving an AP (apurinic apyrimidinic) site. The AP-lyase activity cleaves the phosphodiester bond 3' to the AP site by a beta-elimination, leaving a 3'-terminal unsaturated sugar and a product with a term…	K10773	NTH; endonuclease III	[EC:4.2.99.18]	DNA repair and recombination proteins	Protein families: genetic information processing	Brite Hierarchies	PF00633	Helix-hairpin-helix motif
257sh-1	chromosome	chromosome:1	EXE55_RS06125	endonuclease III	18	P:GO:0006281; P:GO:0006284; P:GO:0006950; P:GO:0006974; P:GO:0008152; P:GO:0090305; F:GO:0003677; F:GO:0003824; F:GO:0003906; F:GO:0004519; F:GO:0016787; F:GO:0016798; F:GO:0016829; F:GO:0019104; F:GO:0046872; F:GO:0051536; F:GO:0051539; F:GO:0140078	P:DNA repair; P:base-excision repair; P:response to stress; P:cellular response to DNA damage stimulus; P:metabolic process; P:nucleic acid phosphodiester bond hydrolysis; F:DNA binding; F:catalytic activity; F:DNA-(apurinic or apyrimidinic site) endonuclease activity; F:endonuclease activity; F:hydrolase activity; F:hydrolase activity, acting on glycosyl bonds; F:lyase activity; F:DNA N-glycosyl…	COG0177@1|root,COG0177@2|Bacteria,1MUYQ@1224|Proteobacteria,2VIRB@28216|Betaproteobacteria,1K260@119060|Burkholderiaceae	L	DNA repair enzyme that has both DNA N-glycosylase activity and AP-lyase activity. The DNA N-glycosylase activity releases various damaged pyrimidines from DNA by cleaving the N- glycosidic bond, leaving an AP (apurinic apyrimidinic) site. The AP-lyase activity cleaves the phosphodiester bond 3' to the AP site by a beta-elimination, leaving a 3'-terminal unsaturated sugar and a product with a term…	K10773	NTH; endonuclease III	[EC:4.2.99.18]	DNA repair and recombination proteins	Protein families: genetic information processing	Brite Hierarchies	PF00730	HhH-GPD superfamily base excision DNA repair protein
257sh-1	chromosome	chromosome:1	EXE55_RS06155	IS5 family transposase	3	P:GO:0006313; F:GO:0003677; F:GO:0004803	P:transposition, DNA-mediated; F:DNA binding; F:transposase activity	COG3293@1|root,COG3293@2|Bacteria,1REUV@1224|Proteobacteria,2VREC@28216|Betaproteobacteria,1K6P0@119060|Burkholderiaceae	L	transposase							PF13340	Putative transposase of IS4/5 family (DUF4096)
257sh-1	chromosome	chromosome:1	EXE55_RS06155	IS5 family transposase	3	P:GO:0006313; F:GO:0003677; F:GO:0004803	P:transposition, DNA-mediated; F:DNA binding; F:transposase activity	COG3293@1|root,COG3293@2|Bacteria,1REUV@1224|Proteobacteria,2VREC@28216|Betaproteobacteria,1K6P0@119060|Burkholderiaceae	L	transposase							PF01609	Transposase DDE domain
257sh-1	chromosome	chromosome:1	EXE55_RS06265	integrase arm-type DNA-binding domain-containing protein				COG0582@1|root,COG0582@2|Bacteria,1MU23@1224|Proteobacteria,2VJD3@28216|Betaproteobacteria,1JZZT@119060|Burkholderiaceae	L	Belongs to the 'phage' integrase family							PF00589	Phage integrase family
257sh-1	chromosome	chromosome:1	EXE55_RS06265	integrase arm-type DNA-binding domain-containing protein				COG0582@1|root,COG0582@2|Bacteria,1MU23@1224|Proteobacteria,2VJD3@28216|Betaproteobacteria,1JZZT@119060|Burkholderiaceae	L	Belongs to the 'phage' integrase family							PF13356	Arm DNA-binding domain
257sh-1	chromosome	chromosome:1	EXE55_RS06285	IS21 family transposase	5	P:GO:0006310; P:GO:0015074; P:GO:0032196; F:GO:0003676; F:GO:0003677	P:DNA recombination; P:DNA integration; P:transposition; F:nucleic acid binding; F:DNA binding	COG4584@1|root,COG4584@2|Bacteria,1MWIV@1224|Proteobacteria,2VH6U@28216|Betaproteobacteria,1K5SV@119060|Burkholderiaceae	L	Integrase core domain							PF13384	Homeodomain-like domain
257sh-1	chromosome	chromosome:1	EXE55_RS06285	IS21 family transposase	5	P:GO:0006310; P:GO:0015074; P:GO:0032196; F:GO:0003676; F:GO:0003677	P:DNA recombination; P:DNA integration; P:transposition; F:nucleic acid binding; F:DNA binding	COG4584@1|root,COG4584@2|Bacteria,1MWIV@1224|Proteobacteria,2VH6U@28216|Betaproteobacteria,1K5SV@119060|Burkholderiaceae	L	Integrase core domain							PF00665	Integrase core domain
257sh-1	chromosome	chromosome:1	EXE55_RS06810	DNA polymerase III subunit chi	6	P:GO:0006260; P:GO:0071897; F:GO:0003677; F:GO:0003887; F:GO:0016740; F:GO:0016779	P:DNA replication; P:DNA biosynthetic process; F:DNA binding; F:DNA-directed DNA polymerase activity; F:transferase activity; F:nucleotidyltransferase activity	COG2927@1|root,COG2927@2|Bacteria,1MZ3V@1224|Proteobacteria,2VTYC@28216|Betaproteobacteria,1K761@119060|Burkholderiaceae	L	dna polymerase III (Chi subunit)	K02339	holC; DNA polymerase III subunit chi	[EC:2.7.7.7]	Homologous recombination	Replication and repair	Genetic Information Processing	PF04364	DNA polymerase III chi subunit, HolC
257sh-1	chromosome	chromosome:1	EXE55_RS06810	DNA polymerase III subunit chi	6	P:GO:0006260; P:GO:0071897; F:GO:0003677; F:GO:0003887; F:GO:0016740; F:GO:0016779	P:DNA replication; P:DNA biosynthetic process; F:DNA binding; F:DNA-directed DNA polymerase activity; F:transferase activity; F:nucleotidyltransferase activity	COG2927@1|root,COG2927@2|Bacteria,1MZ3V@1224|Proteobacteria,2VTYC@28216|Betaproteobacteria,1K761@119060|Burkholderiaceae	L	dna polymerase III (Chi subunit)	K02339	holC; DNA polymerase III subunit chi	[EC:2.7.7.7]	DNA repair and recombination proteins	Protein families: genetic information processing	Brite Hierarchies	PF04364	DNA polymerase III chi subunit, HolC
257sh-1	chromosome	chromosome:1	EXE55_RS06955	IS21 family transposase	5	P:GO:0006310; P:GO:0015074; P:GO:0032196; F:GO:0003676; F:GO:0003677	P:DNA recombination; P:DNA integration; P:transposition; F:nucleic acid binding; F:DNA binding	COG4584@1|root,COG4584@2|Bacteria,1MWIV@1224|Proteobacteria,2VH6U@28216|Betaproteobacteria,1K5SV@119060|Burkholderiaceae	L	Integrase core domain							PF13384	Homeodomain-like domain
257sh-1	chromosome	chromosome:1	EXE55_RS06955	IS21 family transposase	5	P:GO:0006310; P:GO:0015074; P:GO:0032196; F:GO:0003676; F:GO:0003677	P:DNA recombination; P:DNA integration; P:transposition; F:nucleic acid binding; F:DNA binding	COG4584@1|root,COG4584@2|Bacteria,1MWIV@1224|Proteobacteria,2VH6U@28216|Betaproteobacteria,1K5SV@119060|Burkholderiaceae	L	Integrase core domain							PF00665	Integrase core domain
257sh-1	chromosome	chromosome:1	EXE55_RS06965	IS3 family transposase	5	P:GO:0006313; P:GO:0015074; F:GO:0003676; F:GO:0003677; F:GO:0004803	P:transposition, DNA-mediated; P:DNA integration; F:nucleic acid binding; F:DNA binding; F:transposase activity	COG2801@1|root,COG2963@1|root,COG2801@2|Bacteria,COG2963@2|Bacteria,1MY62@1224|Proteobacteria,2VJAF@28216|Betaproteobacteria,1K2XD@119060|Burkholderiaceae	L	transposase	K07497	K07497; putative transposase		Replication and repair	Unclassified: genetic information processing	Not Included in Pathway or Brite	PF01527	Transposase
257sh-1	chromosome	chromosome:1	EXE55_RS06965	IS3 family transposase	5	P:GO:0006313; P:GO:0015074; F:GO:0003676; F:GO:0003677; F:GO:0004803	P:transposition, DNA-mediated; P:DNA integration; F:nucleic acid binding; F:DNA binding; F:transposase activity	COG2801@1|root,COG2963@1|root,COG2801@2|Bacteria,COG2963@2|Bacteria,1MY62@1224|Proteobacteria,2VJAF@28216|Betaproteobacteria,1K2XD@119060|Burkholderiaceae	L	transposase	K07497	K07497; putative transposase		Replication and repair	Unclassified: genetic information processing	Not Included in Pathway or Brite	PF13276	HTH-like domain
257sh-1	chromosome	chromosome:1	EXE55_RS06965	IS3 family transposase	5	P:GO:0006313; P:GO:0015074; F:GO:0003676; F:GO:0003677; F:GO:0004803	P:transposition, DNA-mediated; P:DNA integration; F:nucleic acid binding; F:DNA binding; F:transposase activity	COG2801@1|root,COG2963@1|root,COG2801@2|Bacteria,COG2963@2|Bacteria,1MY62@1224|Proteobacteria,2VJAF@28216|Betaproteobacteria,1K2XD@119060|Burkholderiaceae	L	transposase	K07497	K07497; putative transposase		Replication and repair	Unclassified: genetic information processing	Not Included in Pathway or Brite	PF00665	Integrase core domain
257sh-1	chromosome	chromosome:1	EXE55_RS06970	IS5-like element ISBugl2 family transposase	3	P:GO:0006313; F:GO:0003677; F:GO:0004803	P:transposition, DNA-mediated; F:DNA binding; F:transposase activity	COG3293@1|root,COG3293@2|Bacteria,1REUV@1224|Proteobacteria,2VREC@28216|Betaproteobacteria,1K6P0@119060|Burkholderiaceae	L	transposase							PF01609	Transposase DDE domain
257sh-1	chromosome	chromosome:1	EXE55_RS06970	IS5-like element ISBugl2 family transposase	3	P:GO:0006313; F:GO:0003677; F:GO:0004803	P:transposition, DNA-mediated; F:DNA binding; F:transposase activity	COG3293@1|root,COG3293@2|Bacteria,1REUV@1224|Proteobacteria,2VREC@28216|Betaproteobacteria,1K6P0@119060|Burkholderiaceae	L	transposase							PF13340	Putative transposase of IS4/5 family (DUF4096)
257sh-1	chromosome	chromosome:1	EXE55_RS06995	IS21 family transposase	2	P:GO:0015074; F:GO:0003676	P:DNA integration; F:nucleic acid binding	COG4584@1|root,COG4584@2|Bacteria,1MU2G@1224|Proteobacteria,2VJIW@28216|Betaproteobacteria,1K2PQ@119060|Burkholderiaceae	L	PFAM Integrase catalytic region							PF00665	Integrase core domain
257sh-1	chromosome	chromosome:1	EXE55_RS07065	IS5 family transposase	3	P:GO:0006313; F:GO:0003677; F:GO:0004803	P:transposition, DNA-mediated; F:DNA binding; F:transposase activity	COG3293@1|root,COG3293@2|Bacteria,1REUV@1224|Proteobacteria,2VREC@28216|Betaproteobacteria,1K6P0@119060|Burkholderiaceae	L	transposase							PF13340	Putative transposase of IS4/5 family (DUF4096)
257sh-1	chromosome	chromosome:1	EXE55_RS07065	IS5 family transposase	3	P:GO:0006313; F:GO:0003677; F:GO:0004803	P:transposition, DNA-mediated; F:DNA binding; F:transposase activity	COG3293@1|root,COG3293@2|Bacteria,1REUV@1224|Proteobacteria,2VREC@28216|Betaproteobacteria,1K6P0@119060|Burkholderiaceae	L	transposase							PF01609	Transposase DDE domain
257sh-1	chromosome	chromosome:1	EXE55_RS07115	tyrosine-type recombinase/integrase													PF00589	Phage integrase family
257sh-1	chromosome	chromosome:1	EXE55_RS07250	dUTP diphosphatase	8	P:GO:0006220; P:GO:0006226; P:GO:0009117; P:GO:0046081; F:GO:0000287; F:GO:0004170; F:GO:0016787; F:GO:0046872	P:pyrimidine nucleotide metabolic process; P:dUMP biosynthetic process; P:nucleotide metabolic process; P:dUTP catabolic process; F:magnesium ion binding; F:dUTP diphosphatase activity; F:hydrolase activity; F:metal ion binding	COG0756@1|root,COG0756@2|Bacteria,1RA7P@1224|Proteobacteria,2VQ5I@28216|Betaproteobacteria,1K6Z7@119060|Burkholderiaceae	F	This enzyme is involved in nucleotide metabolism it produces dUMP, the immediate precursor of thymidine nucleotides and it decreases the intracellular concentration of dUTP so that uracil cannot be incorporated into DNA	K01520	dut, DUT; dUTP pyrophosphatase	[EC:3.6.1.23]	DNA repair and recombination proteins	Protein families: genetic information processing	Brite Hierarchies	PF00692	dUTPase
257sh-1	chromosome	chromosome:1	EXE55_RS07395	exodeoxyribonuclease VII large subunit	9	P:GO:0006308; P:GO:0090305; F:GO:0003676; F:GO:0004518; F:GO:0004527; F:GO:0008855; F:GO:0016787; C:GO:0005737; C:GO:0009318	P:DNA catabolic process; P:nucleic acid phosphodiester bond hydrolysis; F:nucleic acid binding; F:nuclease activity; F:exonuclease activity; F:exodeoxyribonuclease VII activity; F:hydrolase activity; C:cytoplasm; C:exodeoxyribonuclease VII complex	COG1570@1|root,COG1570@2|Bacteria,1MUA4@1224|Proteobacteria,2VJIC@28216|Betaproteobacteria,1K2RV@119060|Burkholderiaceae	L	Bidirectionally degrades single-stranded DNA into large acid-insoluble oligonucleotides, which are then degraded further into small acid-soluble oligonucleotides	K03601	xseA; exodeoxyribonuclease VII large subunit	[EC:3.1.11.6]	DNA repair and recombination proteins	Protein families: genetic information processing	Brite Hierarchies	PF02601	Exonuclease VII, large subunit
257sh-1	chromosome	chromosome:1	EXE55_RS07395	exodeoxyribonuclease VII large subunit	9	P:GO:0006308; P:GO:0090305; F:GO:0003676; F:GO:0004518; F:GO:0004527; F:GO:0008855; F:GO:0016787; C:GO:0005737; C:GO:0009318	P:DNA catabolic process; P:nucleic acid phosphodiester bond hydrolysis; F:nucleic acid binding; F:nuclease activity; F:exonuclease activity; F:exodeoxyribonuclease VII activity; F:hydrolase activity; C:cytoplasm; C:exodeoxyribonuclease VII complex	COG1570@1|root,COG1570@2|Bacteria,1MUA4@1224|Proteobacteria,2VJIC@28216|Betaproteobacteria,1K2RV@119060|Burkholderiaceae	L	Bidirectionally degrades single-stranded DNA into large acid-insoluble oligonucleotides, which are then degraded further into small acid-soluble oligonucleotides	K03601	xseA; exodeoxyribonuclease VII large subunit	[EC:3.1.11.6]	DNA repair and recombination proteins	Protein families: genetic information processing	Brite Hierarchies	PF13742	OB-fold nucleic acid binding domain
257sh-1	chromosome	chromosome:1	EXE55_RS07475	site-specific tyrosine recombinase XerD	10	P:GO:0006310; P:GO:0006313; P:GO:0007049; P:GO:0007059; P:GO:0015074; P:GO:0051301; F:GO:0003677; F:GO:0009009; F:GO:0009037; C:GO:0005737	P:DNA recombination; P:transposition, DNA-mediated; P:cell cycle; P:chromosome segregation; P:DNA integration; P:cell division; F:DNA binding; F:site-specific recombinase activity; F:tyrosine-based site-specific recombinase activity; C:cytoplasm	COG4974@1|root,COG4974@2|Bacteria,1MVNF@1224|Proteobacteria,2VIHD@28216|Betaproteobacteria,1K1BK@119060|Burkholderiaceae	D	Tyrosine recombinase XerD	K04763	xerD; integrase/recombinase XerD		Chromosome and associated proteins	Protein families: genetic information processing	Brite Hierarchies	PF02899	Phage integrase, N-terminal SAM-like domain
257sh-1	chromosome	chromosome:1	EXE55_RS07475	site-specific tyrosine recombinase XerD	10	P:GO:0006310; P:GO:0006313; P:GO:0007049; P:GO:0007059; P:GO:0015074; P:GO:0051301; F:GO:0003677; F:GO:0009009; F:GO:0009037; C:GO:0005737	P:DNA recombination; P:transposition, DNA-mediated; P:cell cycle; P:chromosome segregation; P:DNA integration; P:cell division; F:DNA binding; F:site-specific recombinase activity; F:tyrosine-based site-specific recombinase activity; C:cytoplasm	COG4974@1|root,COG4974@2|Bacteria,1MVNF@1224|Proteobacteria,2VIHD@28216|Betaproteobacteria,1K1BK@119060|Burkholderiaceae	D	Tyrosine recombinase XerD	K04763	xerD; integrase/recombinase XerD		Chromosome and associated proteins	Protein families: genetic information processing	Brite Hierarchies	PF00589	Phage integrase family
257sh-1	chromosome	chromosome:1	EXE55_RS07715	threonylcarbamoyl-AMP synthase	8	P:GO:0008033; F:GO:0000166; F:GO:0003725; F:GO:0005524; F:GO:0016740; F:GO:0016779; F:GO:0061710; C:GO:0005737	P:tRNA processing; F:nucleotide binding; F:double-stranded RNA binding; F:ATP binding; F:transferase activity; F:nucleotidyltransferase activity; F:L-threonylcarbamoyladenylate synthase; C:cytoplasm	COG0009@1|root,COG0009@2|Bacteria,1MVPM@1224|Proteobacteria,2VIFT@28216|Betaproteobacteria,1K013@119060|Burkholderiaceae	H	Required for the formation of a threonylcarbamoyl group on adenosine at position 37 (t(6)A37) in tRNAs that read codons beginning with adenine	K07566	tsaC, rimN, SUA5; L-threonylcarbamoyladenylate synthase	[EC:2.7.7.87]	Ribosome biogenesis	Protein families: genetic information processing	Brite Hierarchies	PF01300	Telomere recombination
257sh-1	chromosome	chromosome:1	EXE55_RS07715	threonylcarbamoyl-AMP synthase	8	P:GO:0008033; F:GO:0000166; F:GO:0003725; F:GO:0005524; F:GO:0016740; F:GO:0016779; F:GO:0061710; C:GO:0005737	P:tRNA processing; F:nucleotide binding; F:double-stranded RNA binding; F:ATP binding; F:transferase activity; F:nucleotidyltransferase activity; F:L-threonylcarbamoyladenylate synthase; C:cytoplasm	COG0009@1|root,COG0009@2|Bacteria,1MVPM@1224|Proteobacteria,2VIFT@28216|Betaproteobacteria,1K013@119060|Burkholderiaceae	H	Required for the formation of a threonylcarbamoyl group on adenosine at position 37 (t(6)A37) in tRNAs that read codons beginning with adenine	K07566	tsaC, rimN, SUA5; L-threonylcarbamoyladenylate synthase	[EC:2.7.7.87]	Transfer RNA biogenesis	Protein families: genetic information processing	Brite Hierarchies	PF01300	Telomere recombination
257sh-1	chromosome	chromosome:1	EXE55_RS07835	recombination regulator RecX	2	P:GO:0006282; C:GO:0005737	P:regulation of DNA repair; C:cytoplasm	COG2137@1|root,COG2137@2|Bacteria,1N6P6@1224|Proteobacteria,2VTYZ@28216|Betaproteobacteria,1K2NH@119060|Burkholderiaceae	S	Modulates RecA activity	K03565	recX; regulatory protein		DNA repair and recombination proteins	Protein families: genetic information processing	Brite Hierarchies	PF02631	RecX family
257sh-1	chromosome	chromosome:1	EXE55_RS07840	recombinase RecA	12	P:GO:0006259; P:GO:0006281; P:GO:0006310; P:GO:0006974; P:GO:0009432; F:GO:0000166; F:GO:0003677; F:GO:0003684; F:GO:0003697; F:GO:0005524; F:GO:0008094; C:GO:0005737	P:DNA metabolic process; P:DNA repair; P:DNA recombination; P:cellular response to DNA damage stimulus; P:SOS response; F:nucleotide binding; F:DNA binding; F:damaged DNA binding; F:single-stranded DNA binding; F:ATP binding; F:ATP-dependent activity, acting on DNA; C:cytoplasm	COG0468@1|root,COG0468@2|Bacteria,1MU3C@1224|Proteobacteria,2VHNA@28216|Betaproteobacteria,1K09V@119060|Burkholderiaceae	L	Can catalyze the hydrolysis of ATP in the presence of single-stranded DNA, the ATP-dependent uptake of single-stranded DNA by duplex DNA, and the ATP-dependent hybridization of homologous single-stranded DNAs. It interacts with LexA causing its activation and leading to its autocatalytic cleavage	K03553	recA; recombination protein RecA		Homologous recombination	Replication and repair	Genetic Information Processing	PF00154	recA bacterial DNA recombination protein
257sh-1	chromosome	chromosome:1	EXE55_RS07840	recombinase RecA	12	P:GO:0006259; P:GO:0006281; P:GO:0006310; P:GO:0006974; P:GO:0009432; F:GO:0000166; F:GO:0003677; F:GO:0003684; F:GO:0003697; F:GO:0005524; F:GO:0008094; C:GO:0005737	P:DNA metabolic process; P:DNA repair; P:DNA recombination; P:cellular response to DNA damage stimulus; P:SOS response; F:nucleotide binding; F:DNA binding; F:damaged DNA binding; F:single-stranded DNA binding; F:ATP binding; F:ATP-dependent activity, acting on DNA; C:cytoplasm	COG0468@1|root,COG0468@2|Bacteria,1MU3C@1224|Proteobacteria,2VHNA@28216|Betaproteobacteria,1K09V@119060|Burkholderiaceae	L	Can catalyze the hydrolysis of ATP in the presence of single-stranded DNA, the ATP-dependent uptake of single-stranded DNA by duplex DNA, and the ATP-dependent hybridization of homologous single-stranded DNAs. It interacts with LexA causing its activation and leading to its autocatalytic cleavage	K03553	recA; recombination protein RecA		DNA repair and recombination proteins	Protein families: genetic information processing	Brite Hierarchies	PF00154	recA bacterial DNA recombination protein
257sh-1	chromosome	chromosome:1	EXE55_RS08410	single-stranded DNA-binding protein	6	P:GO:0006260; P:GO:0006281; P:GO:0006310; P:GO:0006974; F:GO:0003677; F:GO:0003697	P:DNA replication; P:DNA repair; P:DNA recombination; P:cellular response to DNA damage stimulus; F:DNA binding; F:single-stranded DNA binding	COG0629@1|root,COG0629@2|Bacteria,1RCWT@1224|Proteobacteria,2VR2Z@28216|Betaproteobacteria,1K2Q6@119060|Burkholderiaceae	L	Plays an important role in DNA replication, recombination and repair. Binds to ssDNA and to an array of partner proteins to recruit them to their sites of action during DNA metabolism	K03111	ssb; single-strand DNA-binding protein		DNA replication	Replication and repair	Genetic Information Processing	PF00436	Single-strand binding protein family
257sh-1	chromosome	chromosome:1	EXE55_RS08410	single-stranded DNA-binding protein	6	P:GO:0006260; P:GO:0006281; P:GO:0006310; P:GO:0006974; F:GO:0003677; F:GO:0003697	P:DNA replication; P:DNA repair; P:DNA recombination; P:cellular response to DNA damage stimulus; F:DNA binding; F:single-stranded DNA binding	COG0629@1|root,COG0629@2|Bacteria,1RCWT@1224|Proteobacteria,2VR2Z@28216|Betaproteobacteria,1K2Q6@119060|Burkholderiaceae	L	Plays an important role in DNA replication, recombination and repair. Binds to ssDNA and to an array of partner proteins to recruit them to their sites of action during DNA metabolism	K03111	ssb; single-strand DNA-binding protein		Mismatch repair	Replication and repair	Genetic Information Processing	PF00436	Single-strand binding protein family
257sh-1	chromosome	chromosome:1	EXE55_RS08410	single-stranded DNA-binding protein	6	P:GO:0006260; P:GO:0006281; P:GO:0006310; P:GO:0006974; F:GO:0003677; F:GO:0003697	P:DNA replication; P:DNA repair; P:DNA recombination; P:cellular response to DNA damage stimulus; F:DNA binding; F:single-stranded DNA binding	COG0629@1|root,COG0629@2|Bacteria,1RCWT@1224|Proteobacteria,2VR2Z@28216|Betaproteobacteria,1K2Q6@119060|Burkholderiaceae	L	Plays an important role in DNA replication, recombination and repair. Binds to ssDNA and to an array of partner proteins to recruit them to their sites of action during DNA metabolism	K03111	ssb; single-strand DNA-binding protein		Homologous recombination	Replication and repair	Genetic Information Processing	PF00436	Single-strand binding protein family
257sh-1	chromosome	chromosome:1	EXE55_RS08410	single-stranded DNA-binding protein	6	P:GO:0006260; P:GO:0006281; P:GO:0006310; P:GO:0006974; F:GO:0003677; F:GO:0003697	P:DNA replication; P:DNA repair; P:DNA recombination; P:cellular response to DNA damage stimulus; F:DNA binding; F:single-stranded DNA binding	COG0629@1|root,COG0629@2|Bacteria,1RCWT@1224|Proteobacteria,2VR2Z@28216|Betaproteobacteria,1K2Q6@119060|Burkholderiaceae	L	Plays an important role in DNA replication, recombination and repair. Binds to ssDNA and to an array of partner proteins to recruit them to their sites of action during DNA metabolism	K03111	ssb; single-strand DNA-binding protein		DNA replication proteins	Protein families: genetic information processing	Brite Hierarchies	PF00436	Single-strand binding protein family
257sh-1	chromosome	chromosome:1	EXE55_RS08410	single-stranded DNA-binding protein	6	P:GO:0006260; P:GO:0006281; P:GO:0006310; P:GO:0006974; F:GO:0003677; F:GO:0003697	P:DNA replication; P:DNA repair; P:DNA recombination; P:cellular response to DNA damage stimulus; F:DNA binding; F:single-stranded DNA binding	COG0629@1|root,COG0629@2|Bacteria,1RCWT@1224|Proteobacteria,2VR2Z@28216|Betaproteobacteria,1K2Q6@119060|Burkholderiaceae	L	Plays an important role in DNA replication, recombination and repair. Binds to ssDNA and to an array of partner proteins to recruit them to their sites of action during DNA metabolism	K03111	ssb; single-strand DNA-binding protein		DNA repair and recombination proteins	Protein families: genetic information processing	Brite Hierarchies	PF00436	Single-strand binding protein family
257sh-1	chromosome	chromosome:1	EXE55_RS08410	single-stranded DNA-binding protein	6	P:GO:0006260; P:GO:0006281; P:GO:0006310; P:GO:0006974; F:GO:0003677; F:GO:0003697	P:DNA replication; P:DNA repair; P:DNA recombination; P:cellular response to DNA damage stimulus; F:DNA binding; F:single-stranded DNA binding	COG0629@1|root,COG0629@2|Bacteria,1RCWT@1224|Proteobacteria,2VR2Z@28216|Betaproteobacteria,1K2Q6@119060|Burkholderiaceae	L	Plays an important role in DNA replication, recombination and repair. Binds to ssDNA and to an array of partner proteins to recruit them to their sites of action during DNA metabolism	K03111	ssb; single-strand DNA-binding protein		Mitochondrial biogenesis	Protein families: genetic information processing	Brite Hierarchies	PF00436	Single-strand binding protein family
257sh-1	chromosome	chromosome:1	EXE55_RS08420	excinuclease ABC subunit UvrA	15	P:GO:0006281; P:GO:0006289; P:GO:0006974; P:GO:0009432; P:GO:0090305; F:GO:0000166; F:GO:0003677; F:GO:0004518; F:GO:0005524; F:GO:0008270; F:GO:0009381; F:GO:0016887; F:GO:0046872; C:GO:0005737; C:GO:0009380	P:DNA repair; P:nucleotide-excision repair; P:cellular response to DNA damage stimulus; P:SOS response; P:nucleic acid phosphodiester bond hydrolysis; F:nucleotide binding; F:DNA binding; F:nuclease activity; F:ATP binding; F:zinc ion binding; F:excinuclease ABC activity; F:ATP hydrolysis activity; F:metal ion binding; C:cytoplasm; C:excinuclease repair complex	COG0178@1|root,COG0178@2|Bacteria,1MW0W@1224|Proteobacteria,2VIJE@28216|Betaproteobacteria,1K1J9@119060|Burkholderiaceae	L	The UvrABC repair system catalyzes the recognition and processing of DNA lesions. UvrA is an ATPase and a DNA-binding protein. A damage recognition complex composed of 2 UvrA and 2 UvrB subunits scans DNA for abnormalities. When the presence of a lesion has been verified by UvrB, the UvrA molecules dissociate	K03701	uvrA; excinuclease ABC subunit A		DNA repair and recombination proteins	Protein families: genetic information processing	Brite Hierarchies	PF17755	UvrA DNA-binding domain
257sh-1	chromosome	chromosome:1	EXE55_RS08420	excinuclease ABC subunit UvrA	15	P:GO:0006281; P:GO:0006289; P:GO:0006974; P:GO:0009432; P:GO:0090305; F:GO:0000166; F:GO:0003677; F:GO:0004518; F:GO:0005524; F:GO:0008270; F:GO:0009381; F:GO:0016887; F:GO:0046872; C:GO:0005737; C:GO:0009380	P:DNA repair; P:nucleotide-excision repair; P:cellular response to DNA damage stimulus; P:SOS response; P:nucleic acid phosphodiester bond hydrolysis; F:nucleotide binding; F:DNA binding; F:nuclease activity; F:ATP binding; F:zinc ion binding; F:excinuclease ABC activity; F:ATP hydrolysis activity; F:metal ion binding; C:cytoplasm; C:excinuclease repair complex	COG0178@1|root,COG0178@2|Bacteria,1MW0W@1224|Proteobacteria,2VIJE@28216|Betaproteobacteria,1K1J9@119060|Burkholderiaceae	L	The UvrABC repair system catalyzes the recognition and processing of DNA lesions. UvrA is an ATPase and a DNA-binding protein. A damage recognition complex composed of 2 UvrA and 2 UvrB subunits scans DNA for abnormalities. When the presence of a lesion has been verified by UvrB, the UvrA molecules dissociate	K03701	uvrA; excinuclease ABC subunit A		DNA repair and recombination proteins	Protein families: genetic information processing	Brite Hierarchies	PF17760	UvrA interaction domain
257sh-1	chromosome	chromosome:1	EXE55_RS08510	A/G-specific adenine glycosylase	14	P:GO:0006281; P:GO:0006284; P:GO:0006950; P:GO:0006974; P:GO:0008152; F:GO:0000701; F:GO:0003677; F:GO:0003824; F:GO:0016787; F:GO:0016798; F:GO:0019104; F:GO:0046872; F:GO:0051536; F:GO:0051539	P:DNA repair; P:base-excision repair; P:response to stress; P:cellular response to DNA damage stimulus; P:metabolic process; F:purine-specific mismatch base pair DNA N-glycosylase activity; F:DNA binding; F:catalytic activity; F:hydrolase activity; F:hydrolase activity, acting on glycosyl bonds; F:DNA N-glycosylase activity; F:metal ion binding; F:iron-sulfur cluster binding; F:4 iron, 4 sulfur c…	COG1194@1|root,COG1194@2|Bacteria,1MUD4@1224|Proteobacteria,2VH21@28216|Betaproteobacteria,1K2KI@119060|Burkholderiaceae	L	a g-specific adenine glycosylase	K03575	mutY; A/G-specific adenine glycosylase	[EC:3.2.2.31]	DNA repair and recombination proteins	Protein families: genetic information processing	Brite Hierarchies	PF00730	HhH-GPD superfamily base excision DNA repair protein
257sh-1	chromosome	chromosome:1	EXE55_RS08510	A/G-specific adenine glycosylase	14	P:GO:0006281; P:GO:0006284; P:GO:0006950; P:GO:0006974; P:GO:0008152; F:GO:0000701; F:GO:0003677; F:GO:0003824; F:GO:0016787; F:GO:0016798; F:GO:0019104; F:GO:0046872; F:GO:0051536; F:GO:0051539	P:DNA repair; P:base-excision repair; P:response to stress; P:cellular response to DNA damage stimulus; P:metabolic process; F:purine-specific mismatch base pair DNA N-glycosylase activity; F:DNA binding; F:catalytic activity; F:hydrolase activity; F:hydrolase activity, acting on glycosyl bonds; F:DNA N-glycosylase activity; F:metal ion binding; F:iron-sulfur cluster binding; F:4 iron, 4 sulfur c…	COG1194@1|root,COG1194@2|Bacteria,1MUD4@1224|Proteobacteria,2VH21@28216|Betaproteobacteria,1K2KI@119060|Burkholderiaceae	L	a g-specific adenine glycosylase	K03575	mutY; A/G-specific adenine glycosylase	[EC:3.2.2.31]	DNA repair and recombination proteins	Protein families: genetic information processing	Brite Hierarchies	PF14815	NUDIX domain
257sh-1	chromosome	chromosome:1	EXE55_RS08510	A/G-specific adenine glycosylase	14	P:GO:0006281; P:GO:0006284; P:GO:0006950; P:GO:0006974; P:GO:0008152; F:GO:0000701; F:GO:0003677; F:GO:0003824; F:GO:0016787; F:GO:0016798; F:GO:0019104; F:GO:0046872; F:GO:0051536; F:GO:0051539	P:DNA repair; P:base-excision repair; P:response to stress; P:cellular response to DNA damage stimulus; P:metabolic process; F:purine-specific mismatch base pair DNA N-glycosylase activity; F:DNA binding; F:catalytic activity; F:hydrolase activity; F:hydrolase activity, acting on glycosyl bonds; F:DNA N-glycosylase activity; F:metal ion binding; F:iron-sulfur cluster binding; F:4 iron, 4 sulfur c…	COG1194@1|root,COG1194@2|Bacteria,1MUD4@1224|Proteobacteria,2VH21@28216|Betaproteobacteria,1K2KI@119060|Burkholderiaceae	L	a g-specific adenine glycosylase	K03575	mutY; A/G-specific adenine glycosylase	[EC:3.2.2.31]	DNA repair and recombination proteins	Protein families: genetic information processing	Brite Hierarchies	PF00633	Helix-hairpin-helix motif
257sh-1	chromosome	chromosome:1	EXE55_RS08515	bifunctional DNA-formamidopyrimidine glycosylase/DNA-(apurinic or apyrimidinic site) lyase	19	P:GO:0006281; P:GO:0006284; P:GO:0006974; P:GO:0008152; P:GO:0090305; F:GO:0003676; F:GO:0003677; F:GO:0003684; F:GO:0003824; F:GO:0003906; F:GO:0008270; F:GO:0008534; F:GO:0016787; F:GO:0016798; F:GO:0016799; F:GO:0016829; F:GO:0019104; F:GO:0046872; F:GO:0140078	P:DNA repair; P:base-excision repair; P:cellular response to DNA damage stimulus; P:metabolic process; P:nucleic acid phosphodiester bond hydrolysis; F:nucleic acid binding; F:DNA binding; F:damaged DNA binding; F:catalytic activity; F:DNA-(apurinic or apyrimidinic site) endonuclease activity; F:zinc ion binding; F:oxidized purine nucleobase lesion DNA N-glycosylase activity; F:hydrolase activity…	COG0266@1|root,COG0266@2|Bacteria,1MVM5@1224|Proteobacteria,2VI10@28216|Betaproteobacteria,1K2ZD@119060|Burkholderiaceae	L	Involved in base excision repair of DNA damaged by oxidation or by mutagenic agents. Acts as DNA glycosylase that recognizes and removes damaged bases. Has a preference for oxidized purines, such as 7,8-dihydro-8-oxoguanine (8-oxoG). Has AP (apurinic apyrimidinic) lyase activity and introduces nicks in the DNA strand. Cleaves the DNA backbone by beta-delta elimination to generate a single-strand …	K10563	mutM, fpg; formamidopyrimidine-DNA glycosylase	[EC:3.2.2.23 4.2.99.18]	DNA repair and recombination proteins	Protein families: genetic information processing	Brite Hierarchies	PF01149	Formamidopyrimidine-DNA glycosylase N-terminal domain
257sh-1	chromosome	chromosome:1	EXE55_RS08515	bifunctional DNA-formamidopyrimidine glycosylase/DNA-(apurinic or apyrimidinic site) lyase	19	P:GO:0006281; P:GO:0006284; P:GO:0006974; P:GO:0008152; P:GO:0090305; F:GO:0003676; F:GO:0003677; F:GO:0003684; F:GO:0003824; F:GO:0003906; F:GO:0008270; F:GO:0008534; F:GO:0016787; F:GO:0016798; F:GO:0016799; F:GO:0016829; F:GO:0019104; F:GO:0046872; F:GO:0140078	P:DNA repair; P:base-excision repair; P:cellular response to DNA damage stimulus; P:metabolic process; P:nucleic acid phosphodiester bond hydrolysis; F:nucleic acid binding; F:DNA binding; F:damaged DNA binding; F:catalytic activity; F:DNA-(apurinic or apyrimidinic site) endonuclease activity; F:zinc ion binding; F:oxidized purine nucleobase lesion DNA N-glycosylase activity; F:hydrolase activity…	COG0266@1|root,COG0266@2|Bacteria,1MVM5@1224|Proteobacteria,2VI10@28216|Betaproteobacteria,1K2ZD@119060|Burkholderiaceae	L	Involved in base excision repair of DNA damaged by oxidation or by mutagenic agents. Acts as DNA glycosylase that recognizes and removes damaged bases. Has a preference for oxidized purines, such as 7,8-dihydro-8-oxoguanine (8-oxoG). Has AP (apurinic apyrimidinic) lyase activity and introduces nicks in the DNA strand. Cleaves the DNA backbone by beta-delta elimination to generate a single-strand …	K10563	mutM, fpg; formamidopyrimidine-DNA glycosylase	[EC:3.2.2.23 4.2.99.18]	DNA repair and recombination proteins	Protein families: genetic information processing	Brite Hierarchies	PF06827	Zinc finger found in FPG and IleRS
257sh-1	chromosome	chromosome:1	EXE55_RS08515	bifunctional DNA-formamidopyrimidine glycosylase/DNA-(apurinic or apyrimidinic site) lyase	19	P:GO:0006281; P:GO:0006284; P:GO:0006974; P:GO:0008152; P:GO:0090305; F:GO:0003676; F:GO:0003677; F:GO:0003684; F:GO:0003824; F:GO:0003906; F:GO:0008270; F:GO:0008534; F:GO:0016787; F:GO:0016798; F:GO:0016799; F:GO:0016829; F:GO:0019104; F:GO:0046872; F:GO:0140078	P:DNA repair; P:base-excision repair; P:cellular response to DNA damage stimulus; P:metabolic process; P:nucleic acid phosphodiester bond hydrolysis; F:nucleic acid binding; F:DNA binding; F:damaged DNA binding; F:catalytic activity; F:DNA-(apurinic or apyrimidinic site) endonuclease activity; F:zinc ion binding; F:oxidized purine nucleobase lesion DNA N-glycosylase activity; F:hydrolase activity…	COG0266@1|root,COG0266@2|Bacteria,1MVM5@1224|Proteobacteria,2VI10@28216|Betaproteobacteria,1K2ZD@119060|Burkholderiaceae	L	Involved in base excision repair of DNA damaged by oxidation or by mutagenic agents. Acts as DNA glycosylase that recognizes and removes damaged bases. Has a preference for oxidized purines, such as 7,8-dihydro-8-oxoguanine (8-oxoG). Has AP (apurinic apyrimidinic) lyase activity and introduces nicks in the DNA strand. Cleaves the DNA backbone by beta-delta elimination to generate a single-strand …	K10563	mutM, fpg; formamidopyrimidine-DNA glycosylase	[EC:3.2.2.23 4.2.99.18]	DNA repair and recombination proteins	Protein families: genetic information processing	Brite Hierarchies	PF06831	Formamidopyrimidine-DNA glycosylase H2TH domain
257sh-1	chromosome	chromosome:1	EXE55_RS08655	error-prone DNA polymerase	11	P:GO:0006260; P:GO:0006281; P:GO:0006974; P:GO:0071897; P:GO:0090305; F:GO:0003824; F:GO:0003887; F:GO:0008408; F:GO:0016740; F:GO:0016779; C:GO:0005737	P:DNA replication; P:DNA repair; P:cellular response to DNA damage stimulus; P:DNA biosynthetic process; P:nucleic acid phosphodiester bond hydrolysis; F:catalytic activity; F:DNA-directed DNA polymerase activity; F:3'-5' exonuclease activity; F:transferase activity; F:nucleotidyltransferase activity; C:cytoplasm	COG0587@1|root,COG0587@2|Bacteria,1MUE4@1224|Proteobacteria,2VHCS@28216|Betaproteobacteria,1K1R9@119060|Burkholderiaceae	L	DNA polymerase involved in damage-induced mutagenesis and translesion synthesis (TLS). It is not the major replicative DNA polymerase	K14162	dnaE2; error-prone DNA polymerase	[EC:2.7.7.7]	DNA repair and recombination proteins	Protein families: genetic information processing	Brite Hierarchies	PF02811	PHP domain
257sh-1	chromosome	chromosome:1	EXE55_RS08655	error-prone DNA polymerase	11	P:GO:0006260; P:GO:0006281; P:GO:0006974; P:GO:0071897; P:GO:0090305; F:GO:0003824; F:GO:0003887; F:GO:0008408; F:GO:0016740; F:GO:0016779; C:GO:0005737	P:DNA replication; P:DNA repair; P:cellular response to DNA damage stimulus; P:DNA biosynthetic process; P:nucleic acid phosphodiester bond hydrolysis; F:catalytic activity; F:DNA-directed DNA polymerase activity; F:3'-5' exonuclease activity; F:transferase activity; F:nucleotidyltransferase activity; C:cytoplasm	COG0587@1|root,COG0587@2|Bacteria,1MUE4@1224|Proteobacteria,2VHCS@28216|Betaproteobacteria,1K1R9@119060|Burkholderiaceae	L	DNA polymerase involved in damage-induced mutagenesis and translesion synthesis (TLS). It is not the major replicative DNA polymerase	K14162	dnaE2; error-prone DNA polymerase	[EC:2.7.7.7]	DNA repair and recombination proteins	Protein families: genetic information processing	Brite Hierarchies	PF14579	Helix-hairpin-helix motif
257sh-1	chromosome	chromosome:1	EXE55_RS08655	error-prone DNA polymerase	11	P:GO:0006260; P:GO:0006281; P:GO:0006974; P:GO:0071897; P:GO:0090305; F:GO:0003824; F:GO:0003887; F:GO:0008408; F:GO:0016740; F:GO:0016779; C:GO:0005737	P:DNA replication; P:DNA repair; P:cellular response to DNA damage stimulus; P:DNA biosynthetic process; P:nucleic acid phosphodiester bond hydrolysis; F:catalytic activity; F:DNA-directed DNA polymerase activity; F:3'-5' exonuclease activity; F:transferase activity; F:nucleotidyltransferase activity; C:cytoplasm	COG0587@1|root,COG0587@2|Bacteria,1MUE4@1224|Proteobacteria,2VHCS@28216|Betaproteobacteria,1K1R9@119060|Burkholderiaceae	L	DNA polymerase involved in damage-induced mutagenesis and translesion synthesis (TLS). It is not the major replicative DNA polymerase	K14162	dnaE2; error-prone DNA polymerase	[EC:2.7.7.7]	DNA repair and recombination proteins	Protein families: genetic information processing	Brite Hierarchies	PF17657	Bacterial DNA polymerase III alpha subunit finger domain
257sh-1	chromosome	chromosome:1	EXE55_RS08655	error-prone DNA polymerase	11	P:GO:0006260; P:GO:0006281; P:GO:0006974; P:GO:0071897; P:GO:0090305; F:GO:0003824; F:GO:0003887; F:GO:0008408; F:GO:0016740; F:GO:0016779; C:GO:0005737	P:DNA replication; P:DNA repair; P:cellular response to DNA damage stimulus; P:DNA biosynthetic process; P:nucleic acid phosphodiester bond hydrolysis; F:catalytic activity; F:DNA-directed DNA polymerase activity; F:3'-5' exonuclease activity; F:transferase activity; F:nucleotidyltransferase activity; C:cytoplasm	COG0587@1|root,COG0587@2|Bacteria,1MUE4@1224|Proteobacteria,2VHCS@28216|Betaproteobacteria,1K1R9@119060|Burkholderiaceae	L	DNA polymerase involved in damage-induced mutagenesis and translesion synthesis (TLS). It is not the major replicative DNA polymerase	K14162	dnaE2; error-prone DNA polymerase	[EC:2.7.7.7]	DNA repair and recombination proteins	Protein families: genetic information processing	Brite Hierarchies	PF07733	Bacterial DNA polymerase III alpha NTPase domain
257sh-1	chromosome	chromosome:1	EXE55_RS08660	DNA polymerase Y family protein	1	P:GO:0006281	P:DNA repair	COG0389@1|root,COG0389@2|Bacteria,1MU5X@1224|Proteobacteria,2VIKH@28216|Betaproteobacteria,1JZWF@119060|Burkholderiaceae	L	DNA polymerase	K14161	imuB; protein ImuB		DNA repair and recombination proteins	Protein families: genetic information processing	Brite Hierarchies	PF00817	impB/mucB/samB family
257sh-1	chromosome	chromosome:1	EXE55_RS08665	translesion DNA synthesis-associated protein ImuA	1	P:GO:0051301	P:cell division	COG4544@1|root,COG4544@2|Bacteria,1MZQU@1224|Proteobacteria,2VUGI@28216|Betaproteobacteria,1K28F@119060|Burkholderiaceae	S	Component of the SOS system and an inhibitor of cell division. Accumulation of SulA causes rapid cessation of cell division and the appearance of long, non-septate filaments. In the presence of GTP, binds a polymerization-competent form of FtsZ in a 1 1 ratio, thus inhibiting FtsZ polymerization and therefore preventing it from participating in the assembly of the Z ring. This mechanism prevents …	K14160	imuA; protein ImuA		DNA repair and recombination proteins	Protein families: genetic information processing	Brite Hierarchies
257sh-1	chromosome	chromosome:1	EXE55_RS08840	IS5-like element ISBugl2 family transposase	3	P:GO:0006313; F:GO:0003677; F:GO:0004803	P:transposition, DNA-mediated; F:DNA binding; F:transposase activity	COG3293@1|root,COG3293@2|Bacteria,1REUV@1224|Proteobacteria,2VREC@28216|Betaproteobacteria,1K6P0@119060|Burkholderiaceae	L	transposase							PF01609	Transposase DDE domain
257sh-1	chromosome	chromosome:1	EXE55_RS08840	IS5-like element ISBugl2 family transposase	3	P:GO:0006313; F:GO:0003677; F:GO:0004803	P:transposition, DNA-mediated; F:DNA binding; F:transposase activity	COG3293@1|root,COG3293@2|Bacteria,1REUV@1224|Proteobacteria,2VREC@28216|Betaproteobacteria,1K6P0@119060|Burkholderiaceae	L	transposase							PF13340	Putative transposase of IS4/5 family (DUF4096)
257sh-1	chromosome	chromosome:1	EXE55_RS08850	IS5 family transposase				COG3293@1|root,COG3293@2|Bacteria,1REUV@1224|Proteobacteria,1SD2K@1236|Gammaproteobacteria	L	COG3293 Transposase and inactivated derivatives							PF13340	Putative transposase of IS4/5 family (DUF4096)
257sh-1	chromosome	chromosome:1	EXE55_RS08850	IS5 family transposase				COG3293@1|root,COG3293@2|Bacteria,1REUV@1224|Proteobacteria,1SD2K@1236|Gammaproteobacteria	L	COG3293 Transposase and inactivated derivatives							PF01609	Transposase DDE domain
257sh-1	chromosome	chromosome:1	EXE55_RS08860	tyrosine-type recombinase/integrase													PF00589	Phage integrase family
257sh-1	chromosome	chromosome:1	EXE55_RS08875	IS21 family transposase	5	P:GO:0006310; P:GO:0015074; P:GO:0032196; F:GO:0003676; F:GO:0003677	P:DNA recombination; P:DNA integration; P:transposition; F:nucleic acid binding; F:DNA binding	COG4584@1|root,COG4584@2|Bacteria,1MWIV@1224|Proteobacteria,2VH6U@28216|Betaproteobacteria,1K5SV@119060|Burkholderiaceae	L	Integrase core domain							PF13384	Homeodomain-like domain
257sh-1	chromosome	chromosome:1	EXE55_RS08875	IS21 family transposase	5	P:GO:0006310; P:GO:0015074; P:GO:0032196; F:GO:0003676; F:GO:0003677	P:DNA recombination; P:DNA integration; P:transposition; F:nucleic acid binding; F:DNA binding	COG4584@1|root,COG4584@2|Bacteria,1MWIV@1224|Proteobacteria,2VH6U@28216|Betaproteobacteria,1K5SV@119060|Burkholderiaceae	L	Integrase core domain							PF00665	Integrase core domain
257sh-1	chromosome	chromosome:1	EXE55_RS09825	tyrosine recombinase XerC	9	P:GO:0006310; P:GO:0006313; P:GO:0007049; P:GO:0007059; P:GO:0015074; P:GO:0051301; F:GO:0003677; F:GO:0009037; C:GO:0005737	P:DNA recombination; P:transposition, DNA-mediated; P:cell cycle; P:chromosome segregation; P:DNA integration; P:cell division; F:DNA binding; F:tyrosine-based site-specific recombinase activity; C:cytoplasm	COG4973@1|root,COG4973@2|Bacteria,1MUJJ@1224|Proteobacteria,2VJ5V@28216|Betaproteobacteria,1K2A3@119060|Burkholderiaceae	D	Belongs to the 'phage' integrase family. XerC subfamily	K03733	xerC; integrase/recombinase XerC		Chromosome and associated proteins	Protein families: genetic information processing	Brite Hierarchies	PF00589	Phage integrase family
257sh-1	chromosome	chromosome:1	EXE55_RS09825	tyrosine recombinase XerC	9	P:GO:0006310; P:GO:0006313; P:GO:0007049; P:GO:0007059; P:GO:0015074; P:GO:0051301; F:GO:0003677; F:GO:0009037; C:GO:0005737	P:DNA recombination; P:transposition, DNA-mediated; P:cell cycle; P:chromosome segregation; P:DNA integration; P:cell division; F:DNA binding; F:tyrosine-based site-specific recombinase activity; C:cytoplasm	COG4973@1|root,COG4973@2|Bacteria,1MUJJ@1224|Proteobacteria,2VJ5V@28216|Betaproteobacteria,1K2A3@119060|Burkholderiaceae	D	Belongs to the 'phage' integrase family. XerC subfamily	K03733	xerC; integrase/recombinase XerC		Chromosome and associated proteins	Protein families: genetic information processing	Brite Hierarchies	PF02899	Phage integrase, N-terminal SAM-like domain
257sh-1	chromosome	chromosome:1	EXE55_RS09915	exodeoxyribonuclease III	8	P:GO:0006281; P:GO:0090305; F:GO:0003824; F:GO:0004518; F:GO:0004519; F:GO:0004527; F:GO:0008853; F:GO:0016787	P:DNA repair; P:nucleic acid phosphodiester bond hydrolysis; F:catalytic activity; F:nuclease activity; F:endonuclease activity; F:exonuclease activity; F:exodeoxyribonuclease III activity; F:hydrolase activity	COG0708@1|root,COG0708@2|Bacteria,1MVII@1224|Proteobacteria,2VI74@28216|Betaproteobacteria,1K01S@119060|Burkholderiaceae	L	Exodeoxyribonuclease III	K01142	E3.1.11.2, xthA; exodeoxyribonuclease III	[EC:3.1.11.2]	DNA repair and recombination proteins	Protein families: genetic information processing	Brite Hierarchies	PF03372	Endonuclease/Exonuclease/phosphatase family
257sh-1	chromosome	chromosome:1	EXE55_RS10030	DNA-processing protein DprA	1	P:GO:0009294	P:DNA mediated transformation	COG0758@1|root,COG0758@2|Bacteria,1MVF6@1224|Proteobacteria,2VH3W@28216|Betaproteobacteria,1K1PV@119060|Burkholderiaceae	LU	DNA protecting protein DprA	K04096	smf; DNA processing protein		Replication and repair	Unclassified: genetic information processing	Not Included in Pathway or Brite	PF02481	DNA recombination-mediator protein A
257sh-1	chromosome	chromosome:1	EXE55_RS10030	DNA-processing protein DprA	1	P:GO:0009294	P:DNA mediated transformation	COG0758@1|root,COG0758@2|Bacteria,1MVF6@1224|Proteobacteria,2VH3W@28216|Betaproteobacteria,1K1PV@119060|Burkholderiaceae	LU	DNA protecting protein DprA	K04096	smf; DNA processing protein		Unclassified viral proteins	Unclassified: signaling and cellular processes	Not Included in Pathway or Brite	PF02481	DNA recombination-mediator protein A
257sh-1	chromosome	chromosome:1	EXE55_RS10075	DNA-3-methyladenine glycosylase 2 family protein	11	P:GO:0006281; P:GO:0006284; P:GO:0008152; F:GO:0003824; F:GO:0003905; F:GO:0008725; F:GO:0016787; F:GO:0016798; F:GO:0043916; F:GO:0052821; F:GO:0052822	P:DNA repair; P:base-excision repair; P:metabolic process; F:catalytic activity; F:alkylbase DNA N-glycosylase activity; F:DNA-3-methyladenine glycosylase activity; F:hydrolase activity; F:hydrolase activity, acting on glycosyl bonds; F:DNA-7-methylguanine glycosylase activity; F:DNA-7-methyladenine glycosylase activity; F:DNA-3-methylguanine glycosylase activity	COG0122@1|root,COG0122@2|Bacteria,1PDQF@1224|Proteobacteria,2VH56@28216|Betaproteobacteria,1K3RY@119060|Burkholderiaceae	L	AlkA domain protein	K01247	alkA; DNA-3-methyladenine glycosylase II	[EC:3.2.2.21]	DNA repair and recombination proteins	Protein families: genetic information processing	Brite Hierarchies	PF00730	HhH-GPD superfamily base excision DNA repair protein
257sh-1	chromosome	chromosome:1	EXE55_RS10075	DNA-3-methyladenine glycosylase 2 family protein	11	P:GO:0006281; P:GO:0006284; P:GO:0008152; F:GO:0003824; F:GO:0003905; F:GO:0008725; F:GO:0016787; F:GO:0016798; F:GO:0043916; F:GO:0052821; F:GO:0052822	P:DNA repair; P:base-excision repair; P:metabolic process; F:catalytic activity; F:alkylbase DNA N-glycosylase activity; F:DNA-3-methyladenine glycosylase activity; F:hydrolase activity; F:hydrolase activity, acting on glycosyl bonds; F:DNA-7-methylguanine glycosylase activity; F:DNA-7-methyladenine glycosylase activity; F:DNA-3-methylguanine glycosylase activity	COG0122@1|root,COG0122@2|Bacteria,1PDQF@1224|Proteobacteria,2VH56@28216|Betaproteobacteria,1K3RY@119060|Burkholderiaceae	L	AlkA domain protein	K01247	alkA; DNA-3-methyladenine glycosylase II	[EC:3.2.2.21]	DNA repair and recombination proteins	Protein families: genetic information processing	Brite Hierarchies	PF06029	AlkA N-terminal domain
257sh-1	chromosome	chromosome:1	EXE55_RS10080	bifunctional DNA-binding transcriptional regulator/O6-methylguanine-DNA methyltransferase Ada	14	P:GO:0006281; P:GO:0006307; P:GO:0006355; P:GO:0006974; P:GO:0032259; F:GO:0003677; F:GO:0003700; F:GO:0003824; F:GO:0003908; F:GO:0008168; F:GO:0008270; F:GO:0016740; F:GO:0043565; F:GO:0046872	P:DNA repair; P:DNA dealkylation involved in DNA repair; P:regulation of transcription, DNA-templated; P:cellular response to DNA damage stimulus; P:methylation; F:DNA binding; F:DNA-binding transcription factor activity; F:catalytic activity; F:methylated-DNA-[protein]-cysteine S-methyltransferase activity; F:methyltransferase activity; F:zinc ion binding; F:transferase activity; F:sequence-spec…	COG0350@1|root,COG2169@1|root,COG0350@2|Bacteria,COG2169@2|Bacteria,1N2YQ@1224|Proteobacteria,2VIAK@28216|Betaproteobacteria,1JZQ7@119060|Burkholderiaceae	FL	Involved in the cellular defense against the biological effects of O6-methylguanine (O6-MeG) and O4-methylthymine (O4-MeT) in DNA. Repairs the methylated nucleobase in DNA by stoichiometrically transferring the methyl group to a cysteine residue in the enzyme. This is a suicide reaction the enzyme is irreversibly inactivated	K10778	ada; AraC family transcriptional regulator, regulatory protein of adaptative response / methylated-DNA-[protein]-cysteine methyltransferase	[EC:2.1.1.63]	DNA repair and recombination proteins	Protein families: genetic information processing	Brite Hierarchies	PF12833	Helix-turn-helix domain
257sh-1	chromosome	chromosome:1	EXE55_RS10080	bifunctional DNA-binding transcriptional regulator/O6-methylguanine-DNA methyltransferase Ada	14	P:GO:0006281; P:GO:0006307; P:GO:0006355; P:GO:0006974; P:GO:0032259; F:GO:0003677; F:GO:0003700; F:GO:0003824; F:GO:0003908; F:GO:0008168; F:GO:0008270; F:GO:0016740; F:GO:0043565; F:GO:0046872	P:DNA repair; P:DNA dealkylation involved in DNA repair; P:regulation of transcription, DNA-templated; P:cellular response to DNA damage stimulus; P:methylation; F:DNA binding; F:DNA-binding transcription factor activity; F:catalytic activity; F:methylated-DNA-[protein]-cysteine S-methyltransferase activity; F:methyltransferase activity; F:zinc ion binding; F:transferase activity; F:sequence-spec…	COG0350@1|root,COG2169@1|root,COG0350@2|Bacteria,COG2169@2|Bacteria,1N2YQ@1224|Proteobacteria,2VIAK@28216|Betaproteobacteria,1JZQ7@119060|Burkholderiaceae	FL	Involved in the cellular defense against the biological effects of O6-methylguanine (O6-MeG) and O4-methylthymine (O4-MeT) in DNA. Repairs the methylated nucleobase in DNA by stoichiometrically transferring the methyl group to a cysteine residue in the enzyme. This is a suicide reaction the enzyme is irreversibly inactivated	K10778	ada; AraC family transcriptional regulator, regulatory protein of adaptative response / methylated-DNA-[protein]-cysteine methyltransferase	[EC:2.1.1.63]	DNA repair and recombination proteins	Protein families: genetic information processing	Brite Hierarchies	PF02870	6-O-methylguanine DNA methyltransferase, ribonuclease-like domain
257sh-1	chromosome	chromosome:1	EXE55_RS10080	bifunctional DNA-binding transcriptional regulator/O6-methylguanine-DNA methyltransferase Ada	14	P:GO:0006281; P:GO:0006307; P:GO:0006355; P:GO:0006974; P:GO:0032259; F:GO:0003677; F:GO:0003700; F:GO:0003824; F:GO:0003908; F:GO:0008168; F:GO:0008270; F:GO:0016740; F:GO:0043565; F:GO:0046872	P:DNA repair; P:DNA dealkylation involved in DNA repair; P:regulation of transcription, DNA-templated; P:cellular response to DNA damage stimulus; P:methylation; F:DNA binding; F:DNA-binding transcription factor activity; F:catalytic activity; F:methylated-DNA-[protein]-cysteine S-methyltransferase activity; F:methyltransferase activity; F:zinc ion binding; F:transferase activity; F:sequence-spec…	COG0350@1|root,COG2169@1|root,COG0350@2|Bacteria,COG2169@2|Bacteria,1N2YQ@1224|Proteobacteria,2VIAK@28216|Betaproteobacteria,1JZQ7@119060|Burkholderiaceae	FL	Involved in the cellular defense against the biological effects of O6-methylguanine (O6-MeG) and O4-methylthymine (O4-MeT) in DNA. Repairs the methylated nucleobase in DNA by stoichiometrically transferring the methyl group to a cysteine residue in the enzyme. This is a suicide reaction the enzyme is irreversibly inactivated	K10778	ada; AraC family transcriptional regulator, regulatory protein of adaptative response / methylated-DNA-[protein]-cysteine methyltransferase	[EC:2.1.1.63]	DNA repair and recombination proteins	Protein families: genetic information processing	Brite Hierarchies	PF02805	Metal binding domain of Ada
257sh-1	chromosome	chromosome:1	EXE55_RS10080	bifunctional DNA-binding transcriptional regulator/O6-methylguanine-DNA methyltransferase Ada	14	P:GO:0006281; P:GO:0006307; P:GO:0006355; P:GO:0006974; P:GO:0032259; F:GO:0003677; F:GO:0003700; F:GO:0003824; F:GO:0003908; F:GO:0008168; F:GO:0008270; F:GO:0016740; F:GO:0043565; F:GO:0046872	P:DNA repair; P:DNA dealkylation involved in DNA repair; P:regulation of transcription, DNA-templated; P:cellular response to DNA damage stimulus; P:methylation; F:DNA binding; F:DNA-binding transcription factor activity; F:catalytic activity; F:methylated-DNA-[protein]-cysteine S-methyltransferase activity; F:methyltransferase activity; F:zinc ion binding; F:transferase activity; F:sequence-spec…	COG0350@1|root,COG2169@1|root,COG0350@2|Bacteria,COG2169@2|Bacteria,1N2YQ@1224|Proteobacteria,2VIAK@28216|Betaproteobacteria,1JZQ7@119060|Burkholderiaceae	FL	Involved in the cellular defense against the biological effects of O6-methylguanine (O6-MeG) and O4-methylthymine (O4-MeT) in DNA. Repairs the methylated nucleobase in DNA by stoichiometrically transferring the methyl group to a cysteine residue in the enzyme. This is a suicide reaction the enzyme is irreversibly inactivated	K10778	ada; AraC family transcriptional regulator, regulatory protein of adaptative response / methylated-DNA-[protein]-cysteine methyltransferase	[EC:2.1.1.63]	DNA repair and recombination proteins	Protein families: genetic information processing	Brite Hierarchies	PF01035	6-O-methylguanine DNA methyltransferase, DNA binding domain
257sh-1	chromosome	chromosome:1	EXE55_RS10140	IS5 family transposase	2	C:GO:0016020; C:GO:0016021	C:membrane; C:integral component of membrane	COG3039@1|root,COG3039@2|Bacteria,1MUVI@1224|Proteobacteria,2VK9J@28216|Betaproteobacteria,1K4IS@119060|Burkholderiaceae	L	Product type h extrachromosomal origin							PF05598	Transposase domain (DUF772)
257sh-1	chromosome	chromosome:1	EXE55_RS10140	IS5 family transposase	2	C:GO:0016020; C:GO:0016021	C:membrane; C:integral component of membrane	COG3039@1|root,COG3039@2|Bacteria,1MUVI@1224|Proteobacteria,2VK9J@28216|Betaproteobacteria,1K4IS@119060|Burkholderiaceae	L	Product type h extrachromosomal origin							PF01609	Transposase DDE domain
257sh-1	chromosome	chromosome:1	EXE55_RS10185	DNA polymerase III subunit beta	10	P:GO:0006260; P:GO:0071897; P:GO:0090305; F:GO:0003677; F:GO:0003887; F:GO:0008408; F:GO:0016740; F:GO:0016779; C:GO:0005737; C:GO:0009360	P:DNA replication; P:DNA biosynthetic process; P:nucleic acid phosphodiester bond hydrolysis; F:DNA binding; F:DNA-directed DNA polymerase activity; F:3'-5' exonuclease activity; F:transferase activity; F:nucleotidyltransferase activity; C:cytoplasm; C:DNA polymerase III complex	COG0592@1|root,COG0592@2|Bacteria,1MVD9@1224|Proteobacteria,2VH9B@28216|Betaproteobacteria,1K1D0@119060|Burkholderiaceae	L	Confers DNA tethering and processivity to DNA polymerases and other proteins. Acts as a clamp, forming a ring around DNA (a reaction catalyzed by the clamp-loading complex) which diffuses in an ATP-independent manner freely and bidirectionally along dsDNA. Initially characterized for its ability to contact the catalytic subunit of DNA polymerase III (Pol III), a complex, multichain enzyme respons…	K02338	dnaN; DNA polymerase III subunit beta	[EC:2.7.7.7]	Homologous recombination	Replication and repair	Genetic Information Processing	PF00712	DNA polymerase III beta subunit, N-terminal domain
257sh-1	chromosome	chromosome:1	EXE55_RS10185	DNA polymerase III subunit beta	10	P:GO:0006260; P:GO:0071897; P:GO:0090305; F:GO:0003677; F:GO:0003887; F:GO:0008408; F:GO:0016740; F:GO:0016779; C:GO:0005737; C:GO:0009360	P:DNA replication; P:DNA biosynthetic process; P:nucleic acid phosphodiester bond hydrolysis; F:DNA binding; F:DNA-directed DNA polymerase activity; F:3'-5' exonuclease activity; F:transferase activity; F:nucleotidyltransferase activity; C:cytoplasm; C:DNA polymerase III complex	COG0592@1|root,COG0592@2|Bacteria,1MVD9@1224|Proteobacteria,2VH9B@28216|Betaproteobacteria,1K1D0@119060|Burkholderiaceae	L	Confers DNA tethering and processivity to DNA polymerases and other proteins. Acts as a clamp, forming a ring around DNA (a reaction catalyzed by the clamp-loading complex) which diffuses in an ATP-independent manner freely and bidirectionally along dsDNA. Initially characterized for its ability to contact the catalytic subunit of DNA polymerase III (Pol III), a complex, multichain enzyme respons…	K02338	dnaN; DNA polymerase III subunit beta	[EC:2.7.7.7]	Homologous recombination	Replication and repair	Genetic Information Processing	PF02768	DNA polymerase III beta subunit, C-terminal domain
257sh-1	chromosome	chromosome:1	EXE55_RS10185	DNA polymerase III subunit beta	10	P:GO:0006260; P:GO:0071897; P:GO:0090305; F:GO:0003677; F:GO:0003887; F:GO:0008408; F:GO:0016740; F:GO:0016779; C:GO:0005737; C:GO:0009360	P:DNA replication; P:DNA biosynthetic process; P:nucleic acid phosphodiester bond hydrolysis; F:DNA binding; F:DNA-directed DNA polymerase activity; F:3'-5' exonuclease activity; F:transferase activity; F:nucleotidyltransferase activity; C:cytoplasm; C:DNA polymerase III complex	COG0592@1|root,COG0592@2|Bacteria,1MVD9@1224|Proteobacteria,2VH9B@28216|Betaproteobacteria,1K1D0@119060|Burkholderiaceae	L	Confers DNA tethering and processivity to DNA polymerases and other proteins. Acts as a clamp, forming a ring around DNA (a reaction catalyzed by the clamp-loading complex) which diffuses in an ATP-independent manner freely and bidirectionally along dsDNA. Initially characterized for its ability to contact the catalytic subunit of DNA polymerase III (Pol III), a complex, multichain enzyme respons…	K02338	dnaN; DNA polymerase III subunit beta	[EC:2.7.7.7]	Homologous recombination	Replication and repair	Genetic Information Processing	PF02767	DNA polymerase III beta subunit, central domain
257sh-1	chromosome	chromosome:1	EXE55_RS10185	DNA polymerase III subunit beta	10	P:GO:0006260; P:GO:0071897; P:GO:0090305; F:GO:0003677; F:GO:0003887; F:GO:0008408; F:GO:0016740; F:GO:0016779; C:GO:0005737; C:GO:0009360	P:DNA replication; P:DNA biosynthetic process; P:nucleic acid phosphodiester bond hydrolysis; F:DNA binding; F:DNA-directed DNA polymerase activity; F:3'-5' exonuclease activity; F:transferase activity; F:nucleotidyltransferase activity; C:cytoplasm; C:DNA polymerase III complex	COG0592@1|root,COG0592@2|Bacteria,1MVD9@1224|Proteobacteria,2VH9B@28216|Betaproteobacteria,1K1D0@119060|Burkholderiaceae	L	Confers DNA tethering and processivity to DNA polymerases and other proteins. Acts as a clamp, forming a ring around DNA (a reaction catalyzed by the clamp-loading complex) which diffuses in an ATP-independent manner freely and bidirectionally along dsDNA. Initially characterized for its ability to contact the catalytic subunit of DNA polymerase III (Pol III), a complex, multichain enzyme respons…	K02338	dnaN; DNA polymerase III subunit beta	[EC:2.7.7.7]	DNA repair and recombination proteins	Protein families: genetic information processing	Brite Hierarchies	PF00712	DNA polymerase III beta subunit, N-terminal domain
257sh-1	chromosome	chromosome:1	EXE55_RS10185	DNA polymerase III subunit beta	10	P:GO:0006260; P:GO:0071897; P:GO:0090305; F:GO:0003677; F:GO:0003887; F:GO:0008408; F:GO:0016740; F:GO:0016779; C:GO:0005737; C:GO:0009360	P:DNA replication; P:DNA biosynthetic process; P:nucleic acid phosphodiester bond hydrolysis; F:DNA binding; F:DNA-directed DNA polymerase activity; F:3'-5' exonuclease activity; F:transferase activity; F:nucleotidyltransferase activity; C:cytoplasm; C:DNA polymerase III complex	COG0592@1|root,COG0592@2|Bacteria,1MVD9@1224|Proteobacteria,2VH9B@28216|Betaproteobacteria,1K1D0@119060|Burkholderiaceae	L	Confers DNA tethering and processivity to DNA polymerases and other proteins. Acts as a clamp, forming a ring around DNA (a reaction catalyzed by the clamp-loading complex) which diffuses in an ATP-independent manner freely and bidirectionally along dsDNA. Initially characterized for its ability to contact the catalytic subunit of DNA polymerase III (Pol III), a complex, multichain enzyme respons…	K02338	dnaN; DNA polymerase III subunit beta	[EC:2.7.7.7]	DNA repair and recombination proteins	Protein families: genetic information processing	Brite Hierarchies	PF02768	DNA polymerase III beta subunit, C-terminal domain
257sh-1	chromosome	chromosome:1	EXE55_RS10185	DNA polymerase III subunit beta	10	P:GO:0006260; P:GO:0071897; P:GO:0090305; F:GO:0003677; F:GO:0003887; F:GO:0008408; F:GO:0016740; F:GO:0016779; C:GO:0005737; C:GO:0009360	P:DNA replication; P:DNA biosynthetic process; P:nucleic acid phosphodiester bond hydrolysis; F:DNA binding; F:DNA-directed DNA polymerase activity; F:3'-5' exonuclease activity; F:transferase activity; F:nucleotidyltransferase activity; C:cytoplasm; C:DNA polymerase III complex	COG0592@1|root,COG0592@2|Bacteria,1MVD9@1224|Proteobacteria,2VH9B@28216|Betaproteobacteria,1K1D0@119060|Burkholderiaceae	L	Confers DNA tethering and processivity to DNA polymerases and other proteins. Acts as a clamp, forming a ring around DNA (a reaction catalyzed by the clamp-loading complex) which diffuses in an ATP-independent manner freely and bidirectionally along dsDNA. Initially characterized for its ability to contact the catalytic subunit of DNA polymerase III (Pol III), a complex, multichain enzyme respons…	K02338	dnaN; DNA polymerase III subunit beta	[EC:2.7.7.7]	DNA repair and recombination proteins	Protein families: genetic information processing	Brite Hierarchies	PF02767	DNA polymerase III beta subunit, central domain
257sh-1	chromosome	chromosome:1	EXE55_RS10190	DNA topoisomerase (ATP-hydrolyzing) subunit B	12	P:GO:0006261; P:GO:0006265; P:GO:0051276; F:GO:0000166; F:GO:0003677; F:GO:0003916; F:GO:0003918; F:GO:0005524; F:GO:0016853; F:GO:0046872; C:GO:0005694; C:GO:0005737	P:DNA-dependent DNA replication; P:DNA topological change; P:chromosome organization; F:nucleotide binding; F:DNA binding; F:DNA topoisomerase activity; F:DNA topoisomerase type II (double strand cut, ATP-hydrolyzing) activity; F:ATP binding; F:isomerase activity; F:metal ion binding; C:chromosome; C:cytoplasm	COG0187@1|root,COG0187@2|Bacteria,1MVKT@1224|Proteobacteria,2VI8N@28216|Betaproteobacteria,1K194@119060|Burkholderiaceae	L	A type II topoisomerase that negatively supercoils closed circular double-stranded (ds) DNA in an ATP-dependent manner to modulate DNA topology and maintain chromosomes in an underwound state. Negative supercoiling favors strand separation, and DNA replication, transcription, recombination and repair, all of which involve strand separation. Also able to catalyze the interconversion of other topol…	K02470	gyrB; DNA gyrase subunit B	[EC:5.6.2.2]	DNA replication proteins	Protein families: genetic information processing	Brite Hierarchies	PF00204	DNA gyrase B
257sh-1	chromosome	chromosome:1	EXE55_RS10190	DNA topoisomerase (ATP-hydrolyzing) subunit B	12	P:GO:0006261; P:GO:0006265; P:GO:0051276; F:GO:0000166; F:GO:0003677; F:GO:0003916; F:GO:0003918; F:GO:0005524; F:GO:0016853; F:GO:0046872; C:GO:0005694; C:GO:0005737	P:DNA-dependent DNA replication; P:DNA topological change; P:chromosome organization; F:nucleotide binding; F:DNA binding; F:DNA topoisomerase activity; F:DNA topoisomerase type II (double strand cut, ATP-hydrolyzing) activity; F:ATP binding; F:isomerase activity; F:metal ion binding; C:chromosome; C:cytoplasm	COG0187@1|root,COG0187@2|Bacteria,1MVKT@1224|Proteobacteria,2VI8N@28216|Betaproteobacteria,1K194@119060|Burkholderiaceae	L	A type II topoisomerase that negatively supercoils closed circular double-stranded (ds) DNA in an ATP-dependent manner to modulate DNA topology and maintain chromosomes in an underwound state. Negative supercoiling favors strand separation, and DNA replication, transcription, recombination and repair, all of which involve strand separation. Also able to catalyze the interconversion of other topol…	K02470	gyrB; DNA gyrase subunit B	[EC:5.6.2.2]	DNA replication proteins	Protein families: genetic information processing	Brite Hierarchies	PF02518	Histidine kinase-, DNA gyrase B-, and HSP90-like ATPase
257sh-1	chromosome	chromosome:1	EXE55_RS10190	DNA topoisomerase (ATP-hydrolyzing) subunit B	12	P:GO:0006261; P:GO:0006265; P:GO:0051276; F:GO:0000166; F:GO:0003677; F:GO:0003916; F:GO:0003918; F:GO:0005524; F:GO:0016853; F:GO:0046872; C:GO:0005694; C:GO:0005737	P:DNA-dependent DNA replication; P:DNA topological change; P:chromosome organization; F:nucleotide binding; F:DNA binding; F:DNA topoisomerase activity; F:DNA topoisomerase type II (double strand cut, ATP-hydrolyzing) activity; F:ATP binding; F:isomerase activity; F:metal ion binding; C:chromosome; C:cytoplasm	COG0187@1|root,COG0187@2|Bacteria,1MVKT@1224|Proteobacteria,2VI8N@28216|Betaproteobacteria,1K194@119060|Burkholderiaceae	L	A type II topoisomerase that negatively supercoils closed circular double-stranded (ds) DNA in an ATP-dependent manner to modulate DNA topology and maintain chromosomes in an underwound state. Negative supercoiling favors strand separation, and DNA replication, transcription, recombination and repair, all of which involve strand separation. Also able to catalyze the interconversion of other topol…	K02470	gyrB; DNA gyrase subunit B	[EC:5.6.2.2]	DNA replication proteins	Protein families: genetic information processing	Brite Hierarchies	PF18053	DNA gyrase B subunit insert domain
257sh-1	chromosome	chromosome:1	EXE55_RS10190	DNA topoisomerase (ATP-hydrolyzing) subunit B	12	P:GO:0006261; P:GO:0006265; P:GO:0051276; F:GO:0000166; F:GO:0003677; F:GO:0003916; F:GO:0003918; F:GO:0005524; F:GO:0016853; F:GO:0046872; C:GO:0005694; C:GO:0005737	P:DNA-dependent DNA replication; P:DNA topological change; P:chromosome organization; F:nucleotide binding; F:DNA binding; F:DNA topoisomerase activity; F:DNA topoisomerase type II (double strand cut, ATP-hydrolyzing) activity; F:ATP binding; F:isomerase activity; F:metal ion binding; C:chromosome; C:cytoplasm	COG0187@1|root,COG0187@2|Bacteria,1MVKT@1224|Proteobacteria,2VI8N@28216|Betaproteobacteria,1K194@119060|Burkholderiaceae	L	A type II topoisomerase that negatively supercoils closed circular double-stranded (ds) DNA in an ATP-dependent manner to modulate DNA topology and maintain chromosomes in an underwound state. Negative supercoiling favors strand separation, and DNA replication, transcription, recombination and repair, all of which involve strand separation. Also able to catalyze the interconversion of other topol…	K02470	gyrB; DNA gyrase subunit B	[EC:5.6.2.2]	DNA replication proteins	Protein families: genetic information processing	Brite Hierarchies	PF01751	Toprim domain
257sh-1	chromosome	chromosome:1	EXE55_RS10190	DNA topoisomerase (ATP-hydrolyzing) subunit B	12	P:GO:0006261; P:GO:0006265; P:GO:0051276; F:GO:0000166; F:GO:0003677; F:GO:0003916; F:GO:0003918; F:GO:0005524; F:GO:0016853; F:GO:0046872; C:GO:0005694; C:GO:0005737	P:DNA-dependent DNA replication; P:DNA topological change; P:chromosome organization; F:nucleotide binding; F:DNA binding; F:DNA topoisomerase activity; F:DNA topoisomerase type II (double strand cut, ATP-hydrolyzing) activity; F:ATP binding; F:isomerase activity; F:metal ion binding; C:chromosome; C:cytoplasm	COG0187@1|root,COG0187@2|Bacteria,1MVKT@1224|Proteobacteria,2VI8N@28216|Betaproteobacteria,1K194@119060|Burkholderiaceae	L	A type II topoisomerase that negatively supercoils closed circular double-stranded (ds) DNA in an ATP-dependent manner to modulate DNA topology and maintain chromosomes in an underwound state. Negative supercoiling favors strand separation, and DNA replication, transcription, recombination and repair, all of which involve strand separation. Also able to catalyze the interconversion of other topol…	K02470	gyrB; DNA gyrase subunit B	[EC:5.6.2.2]	DNA replication proteins	Protein families: genetic information processing	Brite Hierarchies	PF00986	DNA gyrase B subunit, carboxyl terminus
257sh-1	chromosome	chromosome:1	EXE55_RS10190	DNA topoisomerase (ATP-hydrolyzing) subunit B	12	P:GO:0006261; P:GO:0006265; P:GO:0051276; F:GO:0000166; F:GO:0003677; F:GO:0003916; F:GO:0003918; F:GO:0005524; F:GO:0016853; F:GO:0046872; C:GO:0005694; C:GO:0005737	P:DNA-dependent DNA replication; P:DNA topological change; P:chromosome organization; F:nucleotide binding; F:DNA binding; F:DNA topoisomerase activity; F:DNA topoisomerase type II (double strand cut, ATP-hydrolyzing) activity; F:ATP binding; F:isomerase activity; F:metal ion binding; C:chromosome; C:cytoplasm	COG0187@1|root,COG0187@2|Bacteria,1MVKT@1224|Proteobacteria,2VI8N@28216|Betaproteobacteria,1K194@119060|Burkholderiaceae	L	A type II topoisomerase that negatively supercoils closed circular double-stranded (ds) DNA in an ATP-dependent manner to modulate DNA topology and maintain chromosomes in an underwound state. Negative supercoiling favors strand separation, and DNA replication, transcription, recombination and repair, all of which involve strand separation. Also able to catalyze the interconversion of other topol…	K02470	gyrB; DNA gyrase subunit B	[EC:5.6.2.2]	DNA repair and recombination proteins	Protein families: genetic information processing	Brite Hierarchies	PF00204	DNA gyrase B
257sh-1	chromosome	chromosome:1	EXE55_RS10190	DNA topoisomerase (ATP-hydrolyzing) subunit B	12	P:GO:0006261; P:GO:0006265; P:GO:0051276; F:GO:0000166; F:GO:0003677; F:GO:0003916; F:GO:0003918; F:GO:0005524; F:GO:0016853; F:GO:0046872; C:GO:0005694; C:GO:0005737	P:DNA-dependent DNA replication; P:DNA topological change; P:chromosome organization; F:nucleotide binding; F:DNA binding; F:DNA topoisomerase activity; F:DNA topoisomerase type II (double strand cut, ATP-hydrolyzing) activity; F:ATP binding; F:isomerase activity; F:metal ion binding; C:chromosome; C:cytoplasm	COG0187@1|root,COG0187@2|Bacteria,1MVKT@1224|Proteobacteria,2VI8N@28216|Betaproteobacteria,1K194@119060|Burkholderiaceae	L	A type II topoisomerase that negatively supercoils closed circular double-stranded (ds) DNA in an ATP-dependent manner to modulate DNA topology and maintain chromosomes in an underwound state. Negative supercoiling favors strand separation, and DNA replication, transcription, recombination and repair, all of which involve strand separation. Also able to catalyze the interconversion of other topol…	K02470	gyrB; DNA gyrase subunit B	[EC:5.6.2.2]	DNA repair and recombination proteins	Protein families: genetic information processing	Brite Hierarchies	PF02518	Histidine kinase-, DNA gyrase B-, and HSP90-like ATPase
257sh-1	chromosome	chromosome:1	EXE55_RS10190	DNA topoisomerase (ATP-hydrolyzing) subunit B	12	P:GO:0006261; P:GO:0006265; P:GO:0051276; F:GO:0000166; F:GO:0003677; F:GO:0003916; F:GO:0003918; F:GO:0005524; F:GO:0016853; F:GO:0046872; C:GO:0005694; C:GO:0005737	P:DNA-dependent DNA replication; P:DNA topological change; P:chromosome organization; F:nucleotide binding; F:DNA binding; F:DNA topoisomerase activity; F:DNA topoisomerase type II (double strand cut, ATP-hydrolyzing) activity; F:ATP binding; F:isomerase activity; F:metal ion binding; C:chromosome; C:cytoplasm	COG0187@1|root,COG0187@2|Bacteria,1MVKT@1224|Proteobacteria,2VI8N@28216|Betaproteobacteria,1K194@119060|Burkholderiaceae	L	A type II topoisomerase that negatively supercoils closed circular double-stranded (ds) DNA in an ATP-dependent manner to modulate DNA topology and maintain chromosomes in an underwound state. Negative supercoiling favors strand separation, and DNA replication, transcription, recombination and repair, all of which involve strand separation. Also able to catalyze the interconversion of other topol…	K02470	gyrB; DNA gyrase subunit B	[EC:5.6.2.2]	DNA repair and recombination proteins	Protein families: genetic information processing	Brite Hierarchies	PF18053	DNA gyrase B subunit insert domain
257sh-1	chromosome	chromosome:1	EXE55_RS10190	DNA topoisomerase (ATP-hydrolyzing) subunit B	12	P:GO:0006261; P:GO:0006265; P:GO:0051276; F:GO:0000166; F:GO:0003677; F:GO:0003916; F:GO:0003918; F:GO:0005524; F:GO:0016853; F:GO:0046872; C:GO:0005694; C:GO:0005737	P:DNA-dependent DNA replication; P:DNA topological change; P:chromosome organization; F:nucleotide binding; F:DNA binding; F:DNA topoisomerase activity; F:DNA topoisomerase type II (double strand cut, ATP-hydrolyzing) activity; F:ATP binding; F:isomerase activity; F:metal ion binding; C:chromosome; C:cytoplasm	COG0187@1|root,COG0187@2|Bacteria,1MVKT@1224|Proteobacteria,2VI8N@28216|Betaproteobacteria,1K194@119060|Burkholderiaceae	L	A type II topoisomerase that negatively supercoils closed circular double-stranded (ds) DNA in an ATP-dependent manner to modulate DNA topology and maintain chromosomes in an underwound state. Negative supercoiling favors strand separation, and DNA replication, transcription, recombination and repair, all of which involve strand separation. Also able to catalyze the interconversion of other topol…	K02470	gyrB; DNA gyrase subunit B	[EC:5.6.2.2]	DNA repair and recombination proteins	Protein families: genetic information processing	Brite Hierarchies	PF01751	Toprim domain
257sh-1	chromosome	chromosome:1	EXE55_RS10190	DNA topoisomerase (ATP-hydrolyzing) subunit B	12	P:GO:0006261; P:GO:0006265; P:GO:0051276; F:GO:0000166; F:GO:0003677; F:GO:0003916; F:GO:0003918; F:GO:0005524; F:GO:0016853; F:GO:0046872; C:GO:0005694; C:GO:0005737	P:DNA-dependent DNA replication; P:DNA topological change; P:chromosome organization; F:nucleotide binding; F:DNA binding; F:DNA topoisomerase activity; F:DNA topoisomerase type II (double strand cut, ATP-hydrolyzing) activity; F:ATP binding; F:isomerase activity; F:metal ion binding; C:chromosome; C:cytoplasm	COG0187@1|root,COG0187@2|Bacteria,1MVKT@1224|Proteobacteria,2VI8N@28216|Betaproteobacteria,1K194@119060|Burkholderiaceae	L	A type II topoisomerase that negatively supercoils closed circular double-stranded (ds) DNA in an ATP-dependent manner to modulate DNA topology and maintain chromosomes in an underwound state. Negative supercoiling favors strand separation, and DNA replication, transcription, recombination and repair, all of which involve strand separation. Also able to catalyze the interconversion of other topol…	K02470	gyrB; DNA gyrase subunit B	[EC:5.6.2.2]	DNA repair and recombination proteins	Protein families: genetic information processing	Brite Hierarchies	PF00986	DNA gyrase B subunit, carboxyl terminus
257sh-1	chromosome	chromosome:1	EXE55_RS10375	HU family DNA-binding protein	5	P:GO:0006310; P:GO:0006355; P:GO:0006417; F:GO:0003677; C:GO:0005694	P:DNA recombination; P:regulation of transcription, DNA-templated; P:regulation of translation; F:DNA binding; C:chromosome	COG0776@1|root,COG0776@2|Bacteria,1MZ5B@1224|Proteobacteria,2VV2U@28216|Betaproteobacteria,1K8FC@119060|Burkholderiaceae	L	Histone-like DNA-binding protein which is capable of wrapping DNA to stabilize it, and thus to prevent its denaturation under extreme environmental conditions	K03530	hupB; DNA-binding protein HU-beta		DNA replication proteins	Protein families: genetic information processing	Brite Hierarchies	PF00216	Bacterial DNA-binding protein
257sh-1	chromosome	chromosome:1	EXE55_RS10375	HU family DNA-binding protein	5	P:GO:0006310; P:GO:0006355; P:GO:0006417; F:GO:0003677; C:GO:0005694	P:DNA recombination; P:regulation of transcription, DNA-templated; P:regulation of translation; F:DNA binding; C:chromosome	COG0776@1|root,COG0776@2|Bacteria,1MZ5B@1224|Proteobacteria,2VV2U@28216|Betaproteobacteria,1K8FC@119060|Burkholderiaceae	L	Histone-like DNA-binding protein which is capable of wrapping DNA to stabilize it, and thus to prevent its denaturation under extreme environmental conditions	K03530	hupB; DNA-binding protein HU-beta		Chromosome and associated proteins	Protein families: genetic information processing	Brite Hierarchies	PF00216	Bacterial DNA-binding protein
257sh-1	chromosome	chromosome:1	EXE55_RS10375	HU family DNA-binding protein	5	P:GO:0006310; P:GO:0006355; P:GO:0006417; F:GO:0003677; C:GO:0005694	P:DNA recombination; P:regulation of transcription, DNA-templated; P:regulation of translation; F:DNA binding; C:chromosome	COG0776@1|root,COG0776@2|Bacteria,1MZ5B@1224|Proteobacteria,2VV2U@28216|Betaproteobacteria,1K8FC@119060|Burkholderiaceae	L	Histone-like DNA-binding protein which is capable of wrapping DNA to stabilize it, and thus to prevent its denaturation under extreme environmental conditions	K03530	hupB; DNA-binding protein HU-beta		DNA repair and recombination proteins	Protein families: genetic information processing	Brite Hierarchies	PF00216	Bacterial DNA-binding protein
257sh-1	chromosome	chromosome:1	EXE55_RS10575	primosomal protein N'	16	P:GO:0006260; P:GO:0006268; P:GO:0006269; P:GO:0032508; F:GO:0000166; F:GO:0003676; F:GO:0003677; F:GO:0003678; F:GO:0004386; F:GO:0005524; F:GO:0008094; F:GO:0008270; F:GO:0016787; F:GO:0016887; F:GO:0046872; C:GO:1990077	P:DNA replication; P:DNA unwinding involved in DNA replication; P:DNA replication, synthesis of RNA primer; P:DNA duplex unwinding; F:nucleotide binding; F:nucleic acid binding; F:DNA binding; F:DNA helicase activity; F:helicase activity; F:ATP binding; F:ATP-dependent activity, acting on DNA; F:zinc ion binding; F:hydrolase activity; F:ATP hydrolysis activity; F:metal ion binding; C:primosome co…	COG1198@1|root,COG1198@2|Bacteria,1MUUZ@1224|Proteobacteria,2VINT@28216|Betaproteobacteria,1JZMW@119060|Burkholderiaceae	L	Involved in the restart of stalled replication forks. Recognizes and binds the arrested nascent DNA chain at stalled replication forks. It can open the DNA duplex, via its helicase activity, and promote assembly of the primosome and loading of the major replicative helicase DnaB onto DNA	K04066	priA; primosomal protein N' (replication factor Y) (superfamily II helicase)	[EC:3.6.4.-]	Homologous recombination	Replication and repair	Genetic Information Processing	PF18319	PriA DNA helicase Cys-rich region (CRR) domain
257sh-1	chromosome	chromosome:1	EXE55_RS10575	primosomal protein N'	16	P:GO:0006260; P:GO:0006268; P:GO:0006269; P:GO:0032508; F:GO:0000166; F:GO:0003676; F:GO:0003677; F:GO:0003678; F:GO:0004386; F:GO:0005524; F:GO:0008094; F:GO:0008270; F:GO:0016787; F:GO:0016887; F:GO:0046872; C:GO:1990077	P:DNA replication; P:DNA unwinding involved in DNA replication; P:DNA replication, synthesis of RNA primer; P:DNA duplex unwinding; F:nucleotide binding; F:nucleic acid binding; F:DNA binding; F:DNA helicase activity; F:helicase activity; F:ATP binding; F:ATP-dependent activity, acting on DNA; F:zinc ion binding; F:hydrolase activity; F:ATP hydrolysis activity; F:metal ion binding; C:primosome co…	COG1198@1|root,COG1198@2|Bacteria,1MUUZ@1224|Proteobacteria,2VINT@28216|Betaproteobacteria,1JZMW@119060|Burkholderiaceae	L	Involved in the restart of stalled replication forks. Recognizes and binds the arrested nascent DNA chain at stalled replication forks. It can open the DNA duplex, via its helicase activity, and promote assembly of the primosome and loading of the major replicative helicase DnaB onto DNA	K04066	priA; primosomal protein N' (replication factor Y) (superfamily II helicase)	[EC:3.6.4.-]	Homologous recombination	Replication and repair	Genetic Information Processing	PF18074	Primosomal protein N C-terminal domain
257sh-1	chromosome	chromosome:1	EXE55_RS10575	primosomal protein N'	16	P:GO:0006260; P:GO:0006268; P:GO:0006269; P:GO:0032508; F:GO:0000166; F:GO:0003676; F:GO:0003677; F:GO:0003678; F:GO:0004386; F:GO:0005524; F:GO:0008094; F:GO:0008270; F:GO:0016787; F:GO:0016887; F:GO:0046872; C:GO:1990077	P:DNA replication; P:DNA unwinding involved in DNA replication; P:DNA replication, synthesis of RNA primer; P:DNA duplex unwinding; F:nucleotide binding; F:nucleic acid binding; F:DNA binding; F:DNA helicase activity; F:helicase activity; F:ATP binding; F:ATP-dependent activity, acting on DNA; F:zinc ion binding; F:hydrolase activity; F:ATP hydrolysis activity; F:metal ion binding; C:primosome co…	COG1198@1|root,COG1198@2|Bacteria,1MUUZ@1224|Proteobacteria,2VINT@28216|Betaproteobacteria,1JZMW@119060|Burkholderiaceae	L	Involved in the restart of stalled replication forks. Recognizes and binds the arrested nascent DNA chain at stalled replication forks. It can open the DNA duplex, via its helicase activity, and promote assembly of the primosome and loading of the major replicative helicase DnaB onto DNA	K04066	priA; primosomal protein N' (replication factor Y) (superfamily II helicase)	[EC:3.6.4.-]	Homologous recombination	Replication and repair	Genetic Information Processing	PF00271	Helicase conserved C-terminal domain
257sh-1	chromosome	chromosome:1	EXE55_RS10575	primosomal protein N'	16	P:GO:0006260; P:GO:0006268; P:GO:0006269; P:GO:0032508; F:GO:0000166; F:GO:0003676; F:GO:0003677; F:GO:0003678; F:GO:0004386; F:GO:0005524; F:GO:0008094; F:GO:0008270; F:GO:0016787; F:GO:0016887; F:GO:0046872; C:GO:1990077	P:DNA replication; P:DNA unwinding involved in DNA replication; P:DNA replication, synthesis of RNA primer; P:DNA duplex unwinding; F:nucleotide binding; F:nucleic acid binding; F:DNA binding; F:DNA helicase activity; F:helicase activity; F:ATP binding; F:ATP-dependent activity, acting on DNA; F:zinc ion binding; F:hydrolase activity; F:ATP hydrolysis activity; F:metal ion binding; C:primosome co…	COG1198@1|root,COG1198@2|Bacteria,1MUUZ@1224|Proteobacteria,2VINT@28216|Betaproteobacteria,1JZMW@119060|Burkholderiaceae	L	Involved in the restart of stalled replication forks. Recognizes and binds the arrested nascent DNA chain at stalled replication forks. It can open the DNA duplex, via its helicase activity, and promote assembly of the primosome and loading of the major replicative helicase DnaB onto DNA	K04066	priA; primosomal protein N' (replication factor Y) (superfamily II helicase)	[EC:3.6.4.-]	Homologous recombination	Replication and repair	Genetic Information Processing	PF00270	DEAD/DEAH box helicase
257sh-1	chromosome	chromosome:1	EXE55_RS10575	primosomal protein N'	16	P:GO:0006260; P:GO:0006268; P:GO:0006269; P:GO:0032508; F:GO:0000166; F:GO:0003676; F:GO:0003677; F:GO:0003678; F:GO:0004386; F:GO:0005524; F:GO:0008094; F:GO:0008270; F:GO:0016787; F:GO:0016887; F:GO:0046872; C:GO:1990077	P:DNA replication; P:DNA unwinding involved in DNA replication; P:DNA replication, synthesis of RNA primer; P:DNA duplex unwinding; F:nucleotide binding; F:nucleic acid binding; F:DNA binding; F:DNA helicase activity; F:helicase activity; F:ATP binding; F:ATP-dependent activity, acting on DNA; F:zinc ion binding; F:hydrolase activity; F:ATP hydrolysis activity; F:metal ion binding; C:primosome co…	COG1198@1|root,COG1198@2|Bacteria,1MUUZ@1224|Proteobacteria,2VINT@28216|Betaproteobacteria,1JZMW@119060|Burkholderiaceae	L	Involved in the restart of stalled replication forks. Recognizes and binds the arrested nascent DNA chain at stalled replication forks. It can open the DNA duplex, via its helicase activity, and promote assembly of the primosome and loading of the major replicative helicase DnaB onto DNA	K04066	priA; primosomal protein N' (replication factor Y) (superfamily II helicase)	[EC:3.6.4.-]	Homologous recombination	Replication and repair	Genetic Information Processing	PF17764	3'DNA-binding domain (3'BD)
257sh-1	chromosome	chromosome:1	EXE55_RS10575	primosomal protein N'	16	P:GO:0006260; P:GO:0006268; P:GO:0006269; P:GO:0032508; F:GO:0000166; F:GO:0003676; F:GO:0003677; F:GO:0003678; F:GO:0004386; F:GO:0005524; F:GO:0008094; F:GO:0008270; F:GO:0016787; F:GO:0016887; F:GO:0046872; C:GO:1990077	P:DNA replication; P:DNA unwinding involved in DNA replication; P:DNA replication, synthesis of RNA primer; P:DNA duplex unwinding; F:nucleotide binding; F:nucleic acid binding; F:DNA binding; F:DNA helicase activity; F:helicase activity; F:ATP binding; F:ATP-dependent activity, acting on DNA; F:zinc ion binding; F:hydrolase activity; F:ATP hydrolysis activity; F:metal ion binding; C:primosome co…	COG1198@1|root,COG1198@2|Bacteria,1MUUZ@1224|Proteobacteria,2VINT@28216|Betaproteobacteria,1JZMW@119060|Burkholderiaceae	L	Involved in the restart of stalled replication forks. Recognizes and binds the arrested nascent DNA chain at stalled replication forks. It can open the DNA duplex, via its helicase activity, and promote assembly of the primosome and loading of the major replicative helicase DnaB onto DNA	K04066	priA; primosomal protein N' (replication factor Y) (superfamily II helicase)	[EC:3.6.4.-]	DNA repair and recombination proteins	Protein families: genetic information processing	Brite Hierarchies	PF18319	PriA DNA helicase Cys-rich region (CRR) domain
257sh-1	chromosome	chromosome:1	EXE55_RS10575	primosomal protein N'	16	P:GO:0006260; P:GO:0006268; P:GO:0006269; P:GO:0032508; F:GO:0000166; F:GO:0003676; F:GO:0003677; F:GO:0003678; F:GO:0004386; F:GO:0005524; F:GO:0008094; F:GO:0008270; F:GO:0016787; F:GO:0016887; F:GO:0046872; C:GO:1990077	P:DNA replication; P:DNA unwinding involved in DNA replication; P:DNA replication, synthesis of RNA primer; P:DNA duplex unwinding; F:nucleotide binding; F:nucleic acid binding; F:DNA binding; F:DNA helicase activity; F:helicase activity; F:ATP binding; F:ATP-dependent activity, acting on DNA; F:zinc ion binding; F:hydrolase activity; F:ATP hydrolysis activity; F:metal ion binding; C:primosome co…	COG1198@1|root,COG1198@2|Bacteria,1MUUZ@1224|Proteobacteria,2VINT@28216|Betaproteobacteria,1JZMW@119060|Burkholderiaceae	L	Involved in the restart of stalled replication forks. Recognizes and binds the arrested nascent DNA chain at stalled replication forks. It can open the DNA duplex, via its helicase activity, and promote assembly of the primosome and loading of the major replicative helicase DnaB onto DNA	K04066	priA; primosomal protein N' (replication factor Y) (superfamily II helicase)	[EC:3.6.4.-]	DNA repair and recombination proteins	Protein families: genetic information processing	Brite Hierarchies	PF18074	Primosomal protein N C-terminal domain
257sh-1	chromosome	chromosome:1	EXE55_RS10575	primosomal protein N'	16	P:GO:0006260; P:GO:0006268; P:GO:0006269; P:GO:0032508; F:GO:0000166; F:GO:0003676; F:GO:0003677; F:GO:0003678; F:GO:0004386; F:GO:0005524; F:GO:0008094; F:GO:0008270; F:GO:0016787; F:GO:0016887; F:GO:0046872; C:GO:1990077	P:DNA replication; P:DNA unwinding involved in DNA replication; P:DNA replication, synthesis of RNA primer; P:DNA duplex unwinding; F:nucleotide binding; F:nucleic acid binding; F:DNA binding; F:DNA helicase activity; F:helicase activity; F:ATP binding; F:ATP-dependent activity, acting on DNA; F:zinc ion binding; F:hydrolase activity; F:ATP hydrolysis activity; F:metal ion binding; C:primosome co…	COG1198@1|root,COG1198@2|Bacteria,1MUUZ@1224|Proteobacteria,2VINT@28216|Betaproteobacteria,1JZMW@119060|Burkholderiaceae	L	Involved in the restart of stalled replication forks. Recognizes and binds the arrested nascent DNA chain at stalled replication forks. It can open the DNA duplex, via its helicase activity, and promote assembly of the primosome and loading of the major replicative helicase DnaB onto DNA	K04066	priA; primosomal protein N' (replication factor Y) (superfamily II helicase)	[EC:3.6.4.-]	DNA repair and recombination proteins	Protein families: genetic information processing	Brite Hierarchies	PF00271	Helicase conserved C-terminal domain
257sh-1	chromosome	chromosome:1	EXE55_RS10575	primosomal protein N'	16	P:GO:0006260; P:GO:0006268; P:GO:0006269; P:GO:0032508; F:GO:0000166; F:GO:0003676; F:GO:0003677; F:GO:0003678; F:GO:0004386; F:GO:0005524; F:GO:0008094; F:GO:0008270; F:GO:0016787; F:GO:0016887; F:GO:0046872; C:GO:1990077	P:DNA replication; P:DNA unwinding involved in DNA replication; P:DNA replication, synthesis of RNA primer; P:DNA duplex unwinding; F:nucleotide binding; F:nucleic acid binding; F:DNA binding; F:DNA helicase activity; F:helicase activity; F:ATP binding; F:ATP-dependent activity, acting on DNA; F:zinc ion binding; F:hydrolase activity; F:ATP hydrolysis activity; F:metal ion binding; C:primosome co…	COG1198@1|root,COG1198@2|Bacteria,1MUUZ@1224|Proteobacteria,2VINT@28216|Betaproteobacteria,1JZMW@119060|Burkholderiaceae	L	Involved in the restart of stalled replication forks. Recognizes and binds the arrested nascent DNA chain at stalled replication forks. It can open the DNA duplex, via its helicase activity, and promote assembly of the primosome and loading of the major replicative helicase DnaB onto DNA	K04066	priA; primosomal protein N' (replication factor Y) (superfamily II helicase)	[EC:3.6.4.-]	DNA repair and recombination proteins	Protein families: genetic information processing	Brite Hierarchies	PF00270	DEAD/DEAH box helicase
257sh-1	chromosome	chromosome:1	EXE55_RS10575	primosomal protein N'	16	P:GO:0006260; P:GO:0006268; P:GO:0006269; P:GO:0032508; F:GO:0000166; F:GO:0003676; F:GO:0003677; F:GO:0003678; F:GO:0004386; F:GO:0005524; F:GO:0008094; F:GO:0008270; F:GO:0016787; F:GO:0016887; F:GO:0046872; C:GO:1990077	P:DNA replication; P:DNA unwinding involved in DNA replication; P:DNA replication, synthesis of RNA primer; P:DNA duplex unwinding; F:nucleotide binding; F:nucleic acid binding; F:DNA binding; F:DNA helicase activity; F:helicase activity; F:ATP binding; F:ATP-dependent activity, acting on DNA; F:zinc ion binding; F:hydrolase activity; F:ATP hydrolysis activity; F:metal ion binding; C:primosome co…	COG1198@1|root,COG1198@2|Bacteria,1MUUZ@1224|Proteobacteria,2VINT@28216|Betaproteobacteria,1JZMW@119060|Burkholderiaceae	L	Involved in the restart of stalled replication forks. Recognizes and binds the arrested nascent DNA chain at stalled replication forks. It can open the DNA duplex, via its helicase activity, and promote assembly of the primosome and loading of the major replicative helicase DnaB onto DNA	K04066	priA; primosomal protein N' (replication factor Y) (superfamily II helicase)	[EC:3.6.4.-]	DNA repair and recombination proteins	Protein families: genetic information processing	Brite Hierarchies	PF17764	3'DNA-binding domain (3'BD)
257sh-1	chromosome	chromosome:1	EXE55_RS10675	hypothetical protein				COG1343@1|root,COG1343@2|Bacteria,1R35B@1224|Proteobacteria,2WIFM@28216|Betaproteobacteria,1KISE@119060|Burkholderiaceae	M	CRISPR (clustered regularly interspaced short palindromic repeat), is an adaptive immune system that provides protection against mobile genetic elements (viruses, transposable elements and conjugative plasmids). CRISPR clusters contain sequences complementary to antecedent mobile elements and target invading nucleic acids. CRISPR clusters are transcribed and processed into CRISPR RNA (crRNA). Fun…
257sh-1	chromosome	chromosome:1	EXE55_RS10685	UvrD-helicase domain-containing protein	12	P:GO:0006260; P:GO:0006268; P:GO:0090305; F:GO:0000166; F:GO:0003677; F:GO:0003678; F:GO:0003697; F:GO:0004386; F:GO:0005524; F:GO:0008408; F:GO:0016787; F:GO:0016887	P:DNA replication; P:DNA unwinding involved in DNA replication; P:nucleic acid phosphodiester bond hydrolysis; F:nucleotide binding; F:DNA binding; F:DNA helicase activity; F:single-stranded DNA binding; F:helicase activity; F:ATP binding; F:3'-5' exonuclease activity; F:hydrolase activity; F:ATP hydrolysis activity	COG0210@1|root,COG0210@2|Bacteria,1MU0G@1224|Proteobacteria,2VJFM@28216|Betaproteobacteria,1K19K@119060|Burkholderiaceae	L	it can initiate unwinding at a nick in the DNA. It binds to the single-stranded DNA and acts in a progressive fashion along the DNA in the 3' to 5' direction	K03656	rep; ATP-dependent DNA helicase Rep	[EC:5.6.2.4]	DNA repair and recombination proteins	Protein families: genetic information processing	Brite Hierarchies	PF00580	UvrD/REP helicase N-terminal domain
257sh-1	chromosome	chromosome:1	EXE55_RS10685	UvrD-helicase domain-containing protein	12	P:GO:0006260; P:GO:0006268; P:GO:0090305; F:GO:0000166; F:GO:0003677; F:GO:0003678; F:GO:0003697; F:GO:0004386; F:GO:0005524; F:GO:0008408; F:GO:0016787; F:GO:0016887	P:DNA replication; P:DNA unwinding involved in DNA replication; P:nucleic acid phosphodiester bond hydrolysis; F:nucleotide binding; F:DNA binding; F:DNA helicase activity; F:single-stranded DNA binding; F:helicase activity; F:ATP binding; F:3'-5' exonuclease activity; F:hydrolase activity; F:ATP hydrolysis activity	COG0210@1|root,COG0210@2|Bacteria,1MU0G@1224|Proteobacteria,2VJFM@28216|Betaproteobacteria,1K19K@119060|Burkholderiaceae	L	it can initiate unwinding at a nick in the DNA. It binds to the single-stranded DNA and acts in a progressive fashion along the DNA in the 3' to 5' direction	K03656	rep; ATP-dependent DNA helicase Rep	[EC:5.6.2.4]	DNA repair and recombination proteins	Protein families: genetic information processing	Brite Hierarchies	PF13361	UvrD-like helicase C-terminal domain
257sh-1	chromosome	chromosome:1	EXE55_RS10790	DNA-3-methyladenine glycosylase I	7	P:GO:0006281; P:GO:0006284; P:GO:0008152; F:GO:0003824; F:GO:0008725; F:GO:0016787; F:GO:0016798	P:DNA repair; P:base-excision repair; P:metabolic process; F:catalytic activity; F:DNA-3-methyladenine glycosylase activity; F:hydrolase activity; F:hydrolase activity, acting on glycosyl bonds	COG2818@1|root,COG2818@2|Bacteria,1R9X5@1224|Proteobacteria,2VQC5@28216|Betaproteobacteria,1K1V9@119060|Burkholderiaceae	L	Pfam Methyladenine glycosylase	K01246	tag; DNA-3-methyladenine glycosylase I	[EC:3.2.2.20]	DNA repair and recombination proteins	Protein families: genetic information processing	Brite Hierarchies	PF03352	Methyladenine glycosylase
257sh-1	chromosome	chromosome:1	EXE55_RS10805	H-NS histone family protein	4	P:GO:0006355; F:GO:0003677; C:GO:0005737; C:GO:0009295	P:regulation of transcription, DNA-templated; F:DNA binding; C:cytoplasm; C:nucleoid	COG2916@1|root,COG2916@2|Bacteria,1N7YA@1224|Proteobacteria,2VW5J@28216|Betaproteobacteria,1K8BY@119060|Burkholderiaceae	S	PFAM histone family protein nucleoid-structuring protein H-NS	K03746	hns; DNA-binding protein H-NS		DNA repair and recombination proteins	Protein families: genetic information processing	Brite Hierarchies	PF00816	H-NS histone family
257sh-1	chromosome	chromosome:1	EXE55_RS10960	H-NS histone family protein	4	P:GO:0006355; F:GO:0003677; C:GO:0005737; C:GO:0009295	P:regulation of transcription, DNA-templated; F:DNA binding; C:cytoplasm; C:nucleoid	COG2916@1|root,COG2916@2|Bacteria,1N7YA@1224|Proteobacteria,2VW5J@28216|Betaproteobacteria,1K8MB@119060|Burkholderiaceae	S	Histone family protein nucleoid-structuring protein H-NS	K03746	hns; DNA-binding protein H-NS		DNA repair and recombination proteins	Protein families: genetic information processing	Brite Hierarchies	PF00816	H-NS histone family
257sh-1	chromosome	chromosome:1	EXE55_RS11230	DNA-directed RNA polymerase subunit beta	6	P:GO:0006351; F:GO:0003677; F:GO:0003899; F:GO:0016740; F:GO:0016779; F:GO:0032549	P:transcription, DNA-templated; F:DNA binding; F:DNA-directed 5'-3' RNA polymerase activity; F:transferase activity; F:nucleotidyltransferase activity; F:ribonucleoside binding	COG0085@1|root,COG0085@2|Bacteria,1MUC4@1224|Proteobacteria,2VHF3@28216|Betaproteobacteria,1JZZZ@119060|Burkholderiaceae	K	DNA-dependent RNA polymerase catalyzes the transcription of DNA into RNA using the four ribonucleoside triphosphates as substrates	K03043	rpoB; DNA-directed RNA polymerase subunit beta	[EC:2.7.7.6]	DNA repair and recombination proteins	Protein families: genetic information processing	Brite Hierarchies	PF04560	RNA polymerase Rpb2, domain 7
257sh-1	chromosome	chromosome:1	EXE55_RS11230	DNA-directed RNA polymerase subunit beta	6	P:GO:0006351; F:GO:0003677; F:GO:0003899; F:GO:0016740; F:GO:0016779; F:GO:0032549	P:transcription, DNA-templated; F:DNA binding; F:DNA-directed 5'-3' RNA polymerase activity; F:transferase activity; F:nucleotidyltransferase activity; F:ribonucleoside binding	COG0085@1|root,COG0085@2|Bacteria,1MUC4@1224|Proteobacteria,2VHF3@28216|Betaproteobacteria,1JZZZ@119060|Burkholderiaceae	K	DNA-dependent RNA polymerase catalyzes the transcription of DNA into RNA using the four ribonucleoside triphosphates as substrates	K03043	rpoB; DNA-directed RNA polymerase subunit beta	[EC:2.7.7.6]	DNA repair and recombination proteins	Protein families: genetic information processing	Brite Hierarchies	PF10385	RNA polymerase beta subunit external 1 domain
257sh-1	chromosome	chromosome:1	EXE55_RS11230	DNA-directed RNA polymerase subunit beta	6	P:GO:0006351; F:GO:0003677; F:GO:0003899; F:GO:0016740; F:GO:0016779; F:GO:0032549	P:transcription, DNA-templated; F:DNA binding; F:DNA-directed 5'-3' RNA polymerase activity; F:transferase activity; F:nucleotidyltransferase activity; F:ribonucleoside binding	COG0085@1|root,COG0085@2|Bacteria,1MUC4@1224|Proteobacteria,2VHF3@28216|Betaproteobacteria,1JZZZ@119060|Burkholderiaceae	K	DNA-dependent RNA polymerase catalyzes the transcription of DNA into RNA using the four ribonucleoside triphosphates as substrates	K03043	rpoB; DNA-directed RNA polymerase subunit beta	[EC:2.7.7.6]	DNA repair and recombination proteins	Protein families: genetic information processing	Brite Hierarchies	PF00562	RNA polymerase Rpb2, domain 6
257sh-1	chromosome	chromosome:1	EXE55_RS11230	DNA-directed RNA polymerase subunit beta	6	P:GO:0006351; F:GO:0003677; F:GO:0003899; F:GO:0016740; F:GO:0016779; F:GO:0032549	P:transcription, DNA-templated; F:DNA binding; F:DNA-directed 5'-3' RNA polymerase activity; F:transferase activity; F:nucleotidyltransferase activity; F:ribonucleoside binding	COG0085@1|root,COG0085@2|Bacteria,1MUC4@1224|Proteobacteria,2VHF3@28216|Betaproteobacteria,1JZZZ@119060|Burkholderiaceae	K	DNA-dependent RNA polymerase catalyzes the transcription of DNA into RNA using the four ribonucleoside triphosphates as substrates	K03043	rpoB; DNA-directed RNA polymerase subunit beta	[EC:2.7.7.6]	DNA repair and recombination proteins	Protein families: genetic information processing	Brite Hierarchies	PF04565	RNA polymerase Rpb2, domain 3
257sh-1	chromosome	chromosome:1	EXE55_RS11230	DNA-directed RNA polymerase subunit beta	6	P:GO:0006351; F:GO:0003677; F:GO:0003899; F:GO:0016740; F:GO:0016779; F:GO:0032549	P:transcription, DNA-templated; F:DNA binding; F:DNA-directed 5'-3' RNA polymerase activity; F:transferase activity; F:nucleotidyltransferase activity; F:ribonucleoside binding	COG0085@1|root,COG0085@2|Bacteria,1MUC4@1224|Proteobacteria,2VHF3@28216|Betaproteobacteria,1JZZZ@119060|Burkholderiaceae	K	DNA-dependent RNA polymerase catalyzes the transcription of DNA into RNA using the four ribonucleoside triphosphates as substrates	K03043	rpoB; DNA-directed RNA polymerase subunit beta	[EC:2.7.7.6]	DNA repair and recombination proteins	Protein families: genetic information processing	Brite Hierarchies	PF04561	RNA polymerase Rpb2, domain 2
257sh-1	chromosome	chromosome:1	EXE55_RS11230	DNA-directed RNA polymerase subunit beta	6	P:GO:0006351; F:GO:0003677; F:GO:0003899; F:GO:0016740; F:GO:0016779; F:GO:0032549	P:transcription, DNA-templated; F:DNA binding; F:DNA-directed 5'-3' RNA polymerase activity; F:transferase activity; F:nucleotidyltransferase activity; F:ribonucleoside binding	COG0085@1|root,COG0085@2|Bacteria,1MUC4@1224|Proteobacteria,2VHF3@28216|Betaproteobacteria,1JZZZ@119060|Burkholderiaceae	K	DNA-dependent RNA polymerase catalyzes the transcription of DNA into RNA using the four ribonucleoside triphosphates as substrates	K03043	rpoB; DNA-directed RNA polymerase subunit beta	[EC:2.7.7.6]	DNA repair and recombination proteins	Protein families: genetic information processing	Brite Hierarchies	PF04563	RNA polymerase beta subunit
257sh-1	chromosome	chromosome:1	EXE55_RS11235	DNA-directed RNA polymerase subunit beta'	8	P:GO:0006351; F:GO:0000287; F:GO:0003677; F:GO:0003899; F:GO:0008270; F:GO:0016740; F:GO:0016779; F:GO:0046872	P:transcription, DNA-templated; F:magnesium ion binding; F:DNA binding; F:DNA-directed 5'-3' RNA polymerase activity; F:zinc ion binding; F:transferase activity; F:nucleotidyltransferase activity; F:metal ion binding	COG0086@1|root,COG0086@2|Bacteria,1MU3M@1224|Proteobacteria,2VIF3@28216|Betaproteobacteria,1K0RX@119060|Burkholderiaceae	K	DNA-dependent RNA polymerase catalyzes the transcription of DNA into RNA using the four ribonucleoside triphosphates as substrates	K03046	rpoC; DNA-directed RNA polymerase subunit beta'	[EC:2.7.7.6]	DNA repair and recombination proteins	Protein families: genetic information processing	Brite Hierarchies	PF00623	RNA polymerase Rpb1, domain 2
257sh-1	chromosome	chromosome:1	EXE55_RS11235	DNA-directed RNA polymerase subunit beta'	8	P:GO:0006351; F:GO:0000287; F:GO:0003677; F:GO:0003899; F:GO:0008270; F:GO:0016740; F:GO:0016779; F:GO:0046872	P:transcription, DNA-templated; F:magnesium ion binding; F:DNA binding; F:DNA-directed 5'-3' RNA polymerase activity; F:zinc ion binding; F:transferase activity; F:nucleotidyltransferase activity; F:metal ion binding	COG0086@1|root,COG0086@2|Bacteria,1MU3M@1224|Proteobacteria,2VIF3@28216|Betaproteobacteria,1K0RX@119060|Burkholderiaceae	K	DNA-dependent RNA polymerase catalyzes the transcription of DNA into RNA using the four ribonucleoside triphosphates as substrates	K03046	rpoC; DNA-directed RNA polymerase subunit beta'	[EC:2.7.7.6]	DNA repair and recombination proteins	Protein families: genetic information processing	Brite Hierarchies	PF04997	RNA polymerase Rpb1, domain 1
257sh-1	chromosome	chromosome:1	EXE55_RS11235	DNA-directed RNA polymerase subunit beta'	8	P:GO:0006351; F:GO:0000287; F:GO:0003677; F:GO:0003899; F:GO:0008270; F:GO:0016740; F:GO:0016779; F:GO:0046872	P:transcription, DNA-templated; F:magnesium ion binding; F:DNA binding; F:DNA-directed 5'-3' RNA polymerase activity; F:zinc ion binding; F:transferase activity; F:nucleotidyltransferase activity; F:metal ion binding	COG0086@1|root,COG0086@2|Bacteria,1MU3M@1224|Proteobacteria,2VIF3@28216|Betaproteobacteria,1K0RX@119060|Burkholderiaceae	K	DNA-dependent RNA polymerase catalyzes the transcription of DNA into RNA using the four ribonucleoside triphosphates as substrates	K03046	rpoC; DNA-directed RNA polymerase subunit beta'	[EC:2.7.7.6]	DNA repair and recombination proteins	Protein families: genetic information processing	Brite Hierarchies	PF04998	RNA polymerase Rpb1, domain 5
257sh-1	chromosome	chromosome:1	EXE55_RS11235	DNA-directed RNA polymerase subunit beta'	8	P:GO:0006351; F:GO:0000287; F:GO:0003677; F:GO:0003899; F:GO:0008270; F:GO:0016740; F:GO:0016779; F:GO:0046872	P:transcription, DNA-templated; F:magnesium ion binding; F:DNA binding; F:DNA-directed 5'-3' RNA polymerase activity; F:zinc ion binding; F:transferase activity; F:nucleotidyltransferase activity; F:metal ion binding	COG0086@1|root,COG0086@2|Bacteria,1MU3M@1224|Proteobacteria,2VIF3@28216|Betaproteobacteria,1K0RX@119060|Burkholderiaceae	K	DNA-dependent RNA polymerase catalyzes the transcription of DNA into RNA using the four ribonucleoside triphosphates as substrates	K03046	rpoC; DNA-directed RNA polymerase subunit beta'	[EC:2.7.7.6]	DNA repair and recombination proteins	Protein families: genetic information processing	Brite Hierarchies	PF05000	RNA polymerase Rpb1, domain 4
257sh-1	chromosome	chromosome:1	EXE55_RS11235	DNA-directed RNA polymerase subunit beta'	8	P:GO:0006351; F:GO:0000287; F:GO:0003677; F:GO:0003899; F:GO:0008270; F:GO:0016740; F:GO:0016779; F:GO:0046872	P:transcription, DNA-templated; F:magnesium ion binding; F:DNA binding; F:DNA-directed 5'-3' RNA polymerase activity; F:zinc ion binding; F:transferase activity; F:nucleotidyltransferase activity; F:metal ion binding	COG0086@1|root,COG0086@2|Bacteria,1MU3M@1224|Proteobacteria,2VIF3@28216|Betaproteobacteria,1K0RX@119060|Burkholderiaceae	K	DNA-dependent RNA polymerase catalyzes the transcription of DNA into RNA using the four ribonucleoside triphosphates as substrates	K03046	rpoC; DNA-directed RNA polymerase subunit beta'	[EC:2.7.7.6]	DNA repair and recombination proteins	Protein families: genetic information processing	Brite Hierarchies	PF04983	RNA polymerase Rpb1, domain 3
257sh-1	chromosome	chromosome:1	EXE55_RS11245	DNA helicase RecQ	15	P:GO:0006260; P:GO:0006281; P:GO:0006310; P:GO:0009432; P:GO:0032508; F:GO:0000166; F:GO:0003676; F:GO:0003677; F:GO:0003678; F:GO:0004386; F:GO:0005524; F:GO:0008094; F:GO:0016787; F:GO:0016887; F:GO:0043138	P:DNA replication; P:DNA repair; P:DNA recombination; P:SOS response; P:DNA duplex unwinding; F:nucleotide binding; F:nucleic acid binding; F:DNA binding; F:DNA helicase activity; F:helicase activity; F:ATP binding; F:ATP-dependent activity, acting on DNA; F:hydrolase activity; F:ATP hydrolysis activity; F:3'-5' DNA helicase activity	COG0514@1|root,COG0514@2|Bacteria,1MVGG@1224|Proteobacteria,2VH8W@28216|Betaproteobacteria,1K353@119060|Burkholderiaceae	L	ATP-dependent DNA helicase RecQ	K03654	recQ; ATP-dependent DNA helicase RecQ	[EC:5.6.2.4]	RNA degradation	Folding, sorting and degradation	Genetic Information Processing	PF16124	RecQ zinc-binding
257sh-1	chromosome	chromosome:1	EXE55_RS11245	DNA helicase RecQ	15	P:GO:0006260; P:GO:0006281; P:GO:0006310; P:GO:0009432; P:GO:0032508; F:GO:0000166; F:GO:0003676; F:GO:0003677; F:GO:0003678; F:GO:0004386; F:GO:0005524; F:GO:0008094; F:GO:0016787; F:GO:0016887; F:GO:0043138	P:DNA replication; P:DNA repair; P:DNA recombination; P:SOS response; P:DNA duplex unwinding; F:nucleotide binding; F:nucleic acid binding; F:DNA binding; F:DNA helicase activity; F:helicase activity; F:ATP binding; F:ATP-dependent activity, acting on DNA; F:hydrolase activity; F:ATP hydrolysis activity; F:3'-5' DNA helicase activity	COG0514@1|root,COG0514@2|Bacteria,1MVGG@1224|Proteobacteria,2VH8W@28216|Betaproteobacteria,1K353@119060|Burkholderiaceae	L	ATP-dependent DNA helicase RecQ	K03654	recQ; ATP-dependent DNA helicase RecQ	[EC:5.6.2.4]	RNA degradation	Folding, sorting and degradation	Genetic Information Processing	PF00570	HRDC domain
257sh-1	chromosome	chromosome:1	EXE55_RS11245	DNA helicase RecQ	15	P:GO:0006260; P:GO:0006281; P:GO:0006310; P:GO:0009432; P:GO:0032508; F:GO:0000166; F:GO:0003676; F:GO:0003677; F:GO:0003678; F:GO:0004386; F:GO:0005524; F:GO:0008094; F:GO:0016787; F:GO:0016887; F:GO:0043138	P:DNA replication; P:DNA repair; P:DNA recombination; P:SOS response; P:DNA duplex unwinding; F:nucleotide binding; F:nucleic acid binding; F:DNA binding; F:DNA helicase activity; F:helicase activity; F:ATP binding; F:ATP-dependent activity, acting on DNA; F:hydrolase activity; F:ATP hydrolysis activity; F:3'-5' DNA helicase activity	COG0514@1|root,COG0514@2|Bacteria,1MVGG@1224|Proteobacteria,2VH8W@28216|Betaproteobacteria,1K353@119060|Burkholderiaceae	L	ATP-dependent DNA helicase RecQ	K03654	recQ; ATP-dependent DNA helicase RecQ	[EC:5.6.2.4]	RNA degradation	Folding, sorting and degradation	Genetic Information Processing	PF00271	Helicase conserved C-terminal domain
257sh-1	chromosome	chromosome:1	EXE55_RS11245	DNA helicase RecQ	15	P:GO:0006260; P:GO:0006281; P:GO:0006310; P:GO:0009432; P:GO:0032508; F:GO:0000166; F:GO:0003676; F:GO:0003677; F:GO:0003678; F:GO:0004386; F:GO:0005524; F:GO:0008094; F:GO:0016787; F:GO:0016887; F:GO:0043138	P:DNA replication; P:DNA repair; P:DNA recombination; P:SOS response; P:DNA duplex unwinding; F:nucleotide binding; F:nucleic acid binding; F:DNA binding; F:DNA helicase activity; F:helicase activity; F:ATP binding; F:ATP-dependent activity, acting on DNA; F:hydrolase activity; F:ATP hydrolysis activity; F:3'-5' DNA helicase activity	COG0514@1|root,COG0514@2|Bacteria,1MVGG@1224|Proteobacteria,2VH8W@28216|Betaproteobacteria,1K353@119060|Burkholderiaceae	L	ATP-dependent DNA helicase RecQ	K03654	recQ; ATP-dependent DNA helicase RecQ	[EC:5.6.2.4]	RNA degradation	Folding, sorting and degradation	Genetic Information Processing	PF09382	RQC domain
257sh-1	chromosome	chromosome:1	EXE55_RS11245	DNA helicase RecQ	15	P:GO:0006260; P:GO:0006281; P:GO:0006310; P:GO:0009432; P:GO:0032508; F:GO:0000166; F:GO:0003676; F:GO:0003677; F:GO:0003678; F:GO:0004386; F:GO:0005524; F:GO:0008094; F:GO:0016787; F:GO:0016887; F:GO:0043138	P:DNA replication; P:DNA repair; P:DNA recombination; P:SOS response; P:DNA duplex unwinding; F:nucleotide binding; F:nucleic acid binding; F:DNA binding; F:DNA helicase activity; F:helicase activity; F:ATP binding; F:ATP-dependent activity, acting on DNA; F:hydrolase activity; F:ATP hydrolysis activity; F:3'-5' DNA helicase activity	COG0514@1|root,COG0514@2|Bacteria,1MVGG@1224|Proteobacteria,2VH8W@28216|Betaproteobacteria,1K353@119060|Burkholderiaceae	L	ATP-dependent DNA helicase RecQ	K03654	recQ; ATP-dependent DNA helicase RecQ	[EC:5.6.2.4]	RNA degradation	Folding, sorting and degradation	Genetic Information Processing	PF00270	DEAD/DEAH box helicase
257sh-1	chromosome	chromosome:1	EXE55_RS11245	DNA helicase RecQ	15	P:GO:0006260; P:GO:0006281; P:GO:0006310; P:GO:0009432; P:GO:0032508; F:GO:0000166; F:GO:0003676; F:GO:0003677; F:GO:0003678; F:GO:0004386; F:GO:0005524; F:GO:0008094; F:GO:0016787; F:GO:0016887; F:GO:0043138	P:DNA replication; P:DNA repair; P:DNA recombination; P:SOS response; P:DNA duplex unwinding; F:nucleotide binding; F:nucleic acid binding; F:DNA binding; F:DNA helicase activity; F:helicase activity; F:ATP binding; F:ATP-dependent activity, acting on DNA; F:hydrolase activity; F:ATP hydrolysis activity; F:3'-5' DNA helicase activity	COG0514@1|root,COG0514@2|Bacteria,1MVGG@1224|Proteobacteria,2VH8W@28216|Betaproteobacteria,1K353@119060|Burkholderiaceae	L	ATP-dependent DNA helicase RecQ	K03654	recQ; ATP-dependent DNA helicase RecQ	[EC:5.6.2.4]	Messenger RNA biogenesis	Protein families: genetic information processing	Brite Hierarchies	PF16124	RecQ zinc-binding
257sh-1	chromosome	chromosome:1	EXE55_RS11245	DNA helicase RecQ	15	P:GO:0006260; P:GO:0006281; P:GO:0006310; P:GO:0009432; P:GO:0032508; F:GO:0000166; F:GO:0003676; F:GO:0003677; F:GO:0003678; F:GO:0004386; F:GO:0005524; F:GO:0008094; F:GO:0016787; F:GO:0016887; F:GO:0043138	P:DNA replication; P:DNA repair; P:DNA recombination; P:SOS response; P:DNA duplex unwinding; F:nucleotide binding; F:nucleic acid binding; F:DNA binding; F:DNA helicase activity; F:helicase activity; F:ATP binding; F:ATP-dependent activity, acting on DNA; F:hydrolase activity; F:ATP hydrolysis activity; F:3'-5' DNA helicase activity	COG0514@1|root,COG0514@2|Bacteria,1MVGG@1224|Proteobacteria,2VH8W@28216|Betaproteobacteria,1K353@119060|Burkholderiaceae	L	ATP-dependent DNA helicase RecQ	K03654	recQ; ATP-dependent DNA helicase RecQ	[EC:5.6.2.4]	Messenger RNA biogenesis	Protein families: genetic information processing	Brite Hierarchies	PF00570	HRDC domain
257sh-1	chromosome	chromosome:1	EXE55_RS11245	DNA helicase RecQ	15	P:GO:0006260; P:GO:0006281; P:GO:0006310; P:GO:0009432; P:GO:0032508; F:GO:0000166; F:GO:0003676; F:GO:0003677; F:GO:0003678; F:GO:0004386; F:GO:0005524; F:GO:0008094; F:GO:0016787; F:GO:0016887; F:GO:0043138	P:DNA replication; P:DNA repair; P:DNA recombination; P:SOS response; P:DNA duplex unwinding; F:nucleotide binding; F:nucleic acid binding; F:DNA binding; F:DNA helicase activity; F:helicase activity; F:ATP binding; F:ATP-dependent activity, acting on DNA; F:hydrolase activity; F:ATP hydrolysis activity; F:3'-5' DNA helicase activity	COG0514@1|root,COG0514@2|Bacteria,1MVGG@1224|Proteobacteria,2VH8W@28216|Betaproteobacteria,1K353@119060|Burkholderiaceae	L	ATP-dependent DNA helicase RecQ	K03654	recQ; ATP-dependent DNA helicase RecQ	[EC:5.6.2.4]	Messenger RNA biogenesis	Protein families: genetic information processing	Brite Hierarchies	PF00271	Helicase conserved C-terminal domain
257sh-1	chromosome	chromosome:1	EXE55_RS11245	DNA helicase RecQ	15	P:GO:0006260; P:GO:0006281; P:GO:0006310; P:GO:0009432; P:GO:0032508; F:GO:0000166; F:GO:0003676; F:GO:0003677; F:GO:0003678; F:GO:0004386; F:GO:0005524; F:GO:0008094; F:GO:0016787; F:GO:0016887; F:GO:0043138	P:DNA replication; P:DNA repair; P:DNA recombination; P:SOS response; P:DNA duplex unwinding; F:nucleotide binding; F:nucleic acid binding; F:DNA binding; F:DNA helicase activity; F:helicase activity; F:ATP binding; F:ATP-dependent activity, acting on DNA; F:hydrolase activity; F:ATP hydrolysis activity; F:3'-5' DNA helicase activity	COG0514@1|root,COG0514@2|Bacteria,1MVGG@1224|Proteobacteria,2VH8W@28216|Betaproteobacteria,1K353@119060|Burkholderiaceae	L	ATP-dependent DNA helicase RecQ	K03654	recQ; ATP-dependent DNA helicase RecQ	[EC:5.6.2.4]	Messenger RNA biogenesis	Protein families: genetic information processing	Brite Hierarchies	PF09382	RQC domain
257sh-1	chromosome	chromosome:1	EXE55_RS11245	DNA helicase RecQ	15	P:GO:0006260; P:GO:0006281; P:GO:0006310; P:GO:0009432; P:GO:0032508; F:GO:0000166; F:GO:0003676; F:GO:0003677; F:GO:0003678; F:GO:0004386; F:GO:0005524; F:GO:0008094; F:GO:0016787; F:GO:0016887; F:GO:0043138	P:DNA replication; P:DNA repair; P:DNA recombination; P:SOS response; P:DNA duplex unwinding; F:nucleotide binding; F:nucleic acid binding; F:DNA binding; F:DNA helicase activity; F:helicase activity; F:ATP binding; F:ATP-dependent activity, acting on DNA; F:hydrolase activity; F:ATP hydrolysis activity; F:3'-5' DNA helicase activity	COG0514@1|root,COG0514@2|Bacteria,1MVGG@1224|Proteobacteria,2VH8W@28216|Betaproteobacteria,1K353@119060|Burkholderiaceae	L	ATP-dependent DNA helicase RecQ	K03654	recQ; ATP-dependent DNA helicase RecQ	[EC:5.6.2.4]	Messenger RNA biogenesis	Protein families: genetic information processing	Brite Hierarchies	PF00270	DEAD/DEAH box helicase
257sh-1	chromosome	chromosome:1	EXE55_RS11245	DNA helicase RecQ	15	P:GO:0006260; P:GO:0006281; P:GO:0006310; P:GO:0009432; P:GO:0032508; F:GO:0000166; F:GO:0003676; F:GO:0003677; F:GO:0003678; F:GO:0004386; F:GO:0005524; F:GO:0008094; F:GO:0016787; F:GO:0016887; F:GO:0043138	P:DNA replication; P:DNA repair; P:DNA recombination; P:SOS response; P:DNA duplex unwinding; F:nucleotide binding; F:nucleic acid binding; F:DNA binding; F:DNA helicase activity; F:helicase activity; F:ATP binding; F:ATP-dependent activity, acting on DNA; F:hydrolase activity; F:ATP hydrolysis activity; F:3'-5' DNA helicase activity	COG0514@1|root,COG0514@2|Bacteria,1MVGG@1224|Proteobacteria,2VH8W@28216|Betaproteobacteria,1K353@119060|Burkholderiaceae	L	ATP-dependent DNA helicase RecQ	K03654	recQ; ATP-dependent DNA helicase RecQ	[EC:5.6.2.4]	DNA repair and recombination proteins	Protein families: genetic information processing	Brite Hierarchies	PF16124	RecQ zinc-binding
257sh-1	chromosome	chromosome:1	EXE55_RS11245	DNA helicase RecQ	15	P:GO:0006260; P:GO:0006281; P:GO:0006310; P:GO:0009432; P:GO:0032508; F:GO:0000166; F:GO:0003676; F:GO:0003677; F:GO:0003678; F:GO:0004386; F:GO:0005524; F:GO:0008094; F:GO:0016787; F:GO:0016887; F:GO:0043138	P:DNA replication; P:DNA repair; P:DNA recombination; P:SOS response; P:DNA duplex unwinding; F:nucleotide binding; F:nucleic acid binding; F:DNA binding; F:DNA helicase activity; F:helicase activity; F:ATP binding; F:ATP-dependent activity, acting on DNA; F:hydrolase activity; F:ATP hydrolysis activity; F:3'-5' DNA helicase activity	COG0514@1|root,COG0514@2|Bacteria,1MVGG@1224|Proteobacteria,2VH8W@28216|Betaproteobacteria,1K353@119060|Burkholderiaceae	L	ATP-dependent DNA helicase RecQ	K03654	recQ; ATP-dependent DNA helicase RecQ	[EC:5.6.2.4]	DNA repair and recombination proteins	Protein families: genetic information processing	Brite Hierarchies	PF00570	HRDC domain
257sh-1	chromosome	chromosome:1	EXE55_RS11245	DNA helicase RecQ	15	P:GO:0006260; P:GO:0006281; P:GO:0006310; P:GO:0009432; P:GO:0032508; F:GO:0000166; F:GO:0003676; F:GO:0003677; F:GO:0003678; F:GO:0004386; F:GO:0005524; F:GO:0008094; F:GO:0016787; F:GO:0016887; F:GO:0043138	P:DNA replication; P:DNA repair; P:DNA recombination; P:SOS response; P:DNA duplex unwinding; F:nucleotide binding; F:nucleic acid binding; F:DNA binding; F:DNA helicase activity; F:helicase activity; F:ATP binding; F:ATP-dependent activity, acting on DNA; F:hydrolase activity; F:ATP hydrolysis activity; F:3'-5' DNA helicase activity	COG0514@1|root,COG0514@2|Bacteria,1MVGG@1224|Proteobacteria,2VH8W@28216|Betaproteobacteria,1K353@119060|Burkholderiaceae	L	ATP-dependent DNA helicase RecQ	K03654	recQ; ATP-dependent DNA helicase RecQ	[EC:5.6.2.4]	DNA repair and recombination proteins	Protein families: genetic information processing	Brite Hierarchies	PF00271	Helicase conserved C-terminal domain
257sh-1	chromosome	chromosome:1	EXE55_RS11245	DNA helicase RecQ	15	P:GO:0006260; P:GO:0006281; P:GO:0006310; P:GO:0009432; P:GO:0032508; F:GO:0000166; F:GO:0003676; F:GO:0003677; F:GO:0003678; F:GO:0004386; F:GO:0005524; F:GO:0008094; F:GO:0016787; F:GO:0016887; F:GO:0043138	P:DNA replication; P:DNA repair; P:DNA recombination; P:SOS response; P:DNA duplex unwinding; F:nucleotide binding; F:nucleic acid binding; F:DNA binding; F:DNA helicase activity; F:helicase activity; F:ATP binding; F:ATP-dependent activity, acting on DNA; F:hydrolase activity; F:ATP hydrolysis activity; F:3'-5' DNA helicase activity	COG0514@1|root,COG0514@2|Bacteria,1MVGG@1224|Proteobacteria,2VH8W@28216|Betaproteobacteria,1K353@119060|Burkholderiaceae	L	ATP-dependent DNA helicase RecQ	K03654	recQ; ATP-dependent DNA helicase RecQ	[EC:5.6.2.4]	DNA repair and recombination proteins	Protein families: genetic information processing	Brite Hierarchies	PF09382	RQC domain
257sh-1	chromosome	chromosome:1	EXE55_RS11245	DNA helicase RecQ	15	P:GO:0006260; P:GO:0006281; P:GO:0006310; P:GO:0009432; P:GO:0032508; F:GO:0000166; F:GO:0003676; F:GO:0003677; F:GO:0003678; F:GO:0004386; F:GO:0005524; F:GO:0008094; F:GO:0016787; F:GO:0016887; F:GO:0043138	P:DNA replication; P:DNA repair; P:DNA recombination; P:SOS response; P:DNA duplex unwinding; F:nucleotide binding; F:nucleic acid binding; F:DNA binding; F:DNA helicase activity; F:helicase activity; F:ATP binding; F:ATP-dependent activity, acting on DNA; F:hydrolase activity; F:ATP hydrolysis activity; F:3'-5' DNA helicase activity	COG0514@1|root,COG0514@2|Bacteria,1MVGG@1224|Proteobacteria,2VH8W@28216|Betaproteobacteria,1K353@119060|Burkholderiaceae	L	ATP-dependent DNA helicase RecQ	K03654	recQ; ATP-dependent DNA helicase RecQ	[EC:5.6.2.4]	DNA repair and recombination proteins	Protein families: genetic information processing	Brite Hierarchies	PF00270	DEAD/DEAH box helicase
257sh-1	chromosome	chromosome:1	EXE55_RS11405	DNA-directed RNA polymerase subunit alpha	6	P:GO:0006351; F:GO:0003677; F:GO:0003899; F:GO:0016740; F:GO:0016779; F:GO:0046983	P:transcription, DNA-templated; F:DNA binding; F:DNA-directed 5'-3' RNA polymerase activity; F:transferase activity; F:nucleotidyltransferase activity; F:protein dimerization activity	COG0202@1|root,COG0202@2|Bacteria,1MU75@1224|Proteobacteria,2VHG6@28216|Betaproteobacteria,1K3PH@119060|Burkholderiaceae	K	DNA-dependent RNA polymerase catalyzes the transcription of DNA into RNA using the four ribonucleoside triphosphates as substrates	K03040	rpoA; DNA-directed RNA polymerase subunit alpha	[EC:2.7.7.6]	DNA repair and recombination proteins	Protein families: genetic information processing	Brite Hierarchies	PF01000	RNA polymerase Rpb3/RpoA insert domain
257sh-1	chromosome	chromosome:1	EXE55_RS11405	DNA-directed RNA polymerase subunit alpha	6	P:GO:0006351; F:GO:0003677; F:GO:0003899; F:GO:0016740; F:GO:0016779; F:GO:0046983	P:transcription, DNA-templated; F:DNA binding; F:DNA-directed 5'-3' RNA polymerase activity; F:transferase activity; F:nucleotidyltransferase activity; F:protein dimerization activity	COG0202@1|root,COG0202@2|Bacteria,1MU75@1224|Proteobacteria,2VHG6@28216|Betaproteobacteria,1K3PH@119060|Burkholderiaceae	K	DNA-dependent RNA polymerase catalyzes the transcription of DNA into RNA using the four ribonucleoside triphosphates as substrates	K03040	rpoA; DNA-directed RNA polymerase subunit alpha	[EC:2.7.7.6]	DNA repair and recombination proteins	Protein families: genetic information processing	Brite Hierarchies	PF01193	RNA polymerase Rpb3/Rpb11 dimerisation domain
257sh-1	chromosome	chromosome:1	EXE55_RS11405	DNA-directed RNA polymerase subunit alpha	6	P:GO:0006351; F:GO:0003677; F:GO:0003899; F:GO:0016740; F:GO:0016779; F:GO:0046983	P:transcription, DNA-templated; F:DNA binding; F:DNA-directed 5'-3' RNA polymerase activity; F:transferase activity; F:nucleotidyltransferase activity; F:protein dimerization activity	COG0202@1|root,COG0202@2|Bacteria,1MU75@1224|Proteobacteria,2VHG6@28216|Betaproteobacteria,1K3PH@119060|Burkholderiaceae	K	DNA-dependent RNA polymerase catalyzes the transcription of DNA into RNA using the four ribonucleoside triphosphates as substrates	K03040	rpoA; DNA-directed RNA polymerase subunit alpha	[EC:2.7.7.6]	DNA repair and recombination proteins	Protein families: genetic information processing	Brite Hierarchies	PF03118	Bacterial RNA polymerase, alpha chain C terminal domain
257sh-1	chromosome	chromosome:1	EXE55_RS11545	transposase	3	P:GO:0006313; F:GO:0003677; F:GO:0004803	P:transposition, DNA-mediated; F:DNA binding; F:transposase activity	COG1943@1|root,COG1943@2|Bacteria,1P19I@1224|Proteobacteria,2VKZ3@28216|Betaproteobacteria,1K04H@119060|Burkholderiaceae	L	transposase	K07491	rayT; REP-associated tyrosine transposase		Replication and repair	Unclassified: genetic information processing	Not Included in Pathway or Brite	PF01797	Transposase IS200 like
257sh-1	chromosome	chromosome:1	EXE55_RS11775	IS5-like element ISBugl2 family transposase	3	P:GO:0006313; F:GO:0003677; F:GO:0004803	P:transposition, DNA-mediated; F:DNA binding; F:transposase activity	COG3293@1|root,COG3293@2|Bacteria,1REUV@1224|Proteobacteria,2VREC@28216|Betaproteobacteria,1K6P0@119060|Burkholderiaceae	L	transposase							PF01609	Transposase DDE domain
257sh-1	chromosome	chromosome:1	EXE55_RS11775	IS5-like element ISBugl2 family transposase	3	P:GO:0006313; F:GO:0003677; F:GO:0004803	P:transposition, DNA-mediated; F:DNA binding; F:transposase activity	COG3293@1|root,COG3293@2|Bacteria,1REUV@1224|Proteobacteria,2VREC@28216|Betaproteobacteria,1K6P0@119060|Burkholderiaceae	L	transposase							PF13340	Putative transposase of IS4/5 family (DUF4096)
257sh-1	chromosome	chromosome:1	EXE55_RS11810	IS3 family transposase				COG2801@1|root,COG2801@2|Bacteria,1MVN5@1224|Proteobacteria,2VII1@28216|Betaproteobacteria,1K2HH@119060|Burkholderiaceae	L	similarity to GP 17427840	K07497	K07497; putative transposase		Replication and repair	Unclassified: genetic information processing	Not Included in Pathway or Brite	PF01527	Transposase
257sh-1	chromosome	chromosome:1	EXE55_RS11810	IS3 family transposase				COG2801@1|root,COG2801@2|Bacteria,1MVN5@1224|Proteobacteria,2VII1@28216|Betaproteobacteria,1K2HH@119060|Burkholderiaceae	L	similarity to GP 17427840	K07497	K07497; putative transposase		Replication and repair	Unclassified: genetic information processing	Not Included in Pathway or Brite	PF13683	Integrase core domain
257sh-1	chromosome	chromosome:1	EXE55_RS11810	IS3 family transposase				COG2801@1|root,COG2801@2|Bacteria,1MVN5@1224|Proteobacteria,2VII1@28216|Betaproteobacteria,1K2HH@119060|Burkholderiaceae	L	similarity to GP 17427840	K07497	K07497; putative transposase		Replication and repair	Unclassified: genetic information processing	Not Included in Pathway or Brite	PF13276	HTH-like domain
257sh-1	chromosome	chromosome:1	EXE55_RS11825	IS21 family transposase	2	P:GO:0015074; F:GO:0003676	P:DNA integration; F:nucleic acid binding	COG4584@1|root,COG4584@2|Bacteria,1MU2G@1224|Proteobacteria,2VJIW@28216|Betaproteobacteria,1K2PQ@119060|Burkholderiaceae	L	PFAM Integrase catalytic region							PF00665	Integrase core domain
257sh-1	chromosome	chromosome:1	EXE55_RS11870	IS5 family transposase	3	P:GO:0006313; F:GO:0003677; F:GO:0004803	P:transposition, DNA-mediated; F:DNA binding; F:transposase activity	COG3293@1|root,COG3293@2|Bacteria,1REUV@1224|Proteobacteria,2VREC@28216|Betaproteobacteria,1K6P0@119060|Burkholderiaceae	L	transposase							PF13340	Putative transposase of IS4/5 family (DUF4096)
257sh-1	chromosome	chromosome:1	EXE55_RS11870	IS5 family transposase	3	P:GO:0006313; F:GO:0003677; F:GO:0004803	P:transposition, DNA-mediated; F:DNA binding; F:transposase activity	COG3293@1|root,COG3293@2|Bacteria,1REUV@1224|Proteobacteria,2VREC@28216|Betaproteobacteria,1K6P0@119060|Burkholderiaceae	L	transposase							PF01609	Transposase DDE domain
257sh-1	chromosome	chromosome:1	EXE55_RS11880	IS481 family transposase	2	P:GO:0015074; F:GO:0003676	P:DNA integration; F:nucleic acid binding	COG2801@1|root,COG2801@2|Bacteria,1MZ45@1224|Proteobacteria,2VNA0@28216|Betaproteobacteria,1K69X@119060|Burkholderiaceae	L	Integrase core domain							PF13683	Integrase core domain
257sh-1	chromosome	chromosome:1	EXE55_RS11880	IS481 family transposase	2	P:GO:0015074; F:GO:0003676	P:DNA integration; F:nucleic acid binding	COG2801@1|root,COG2801@2|Bacteria,1MZ45@1224|Proteobacteria,2VNA0@28216|Betaproteobacteria,1K69X@119060|Burkholderiaceae	L	Integrase core domain							PF13551	Winged helix-turn helix
257sh-1	chromosome	chromosome:1	EXE55_RS12130	uracil-DNA glycosylase	9	P:GO:0006281; P:GO:0006284; P:GO:0006974; P:GO:0008152; F:GO:0004844; F:GO:0016787; F:GO:0016798; F:GO:0016799; C:GO:0005737	P:DNA repair; P:base-excision repair; P:cellular response to DNA damage stimulus; P:metabolic process; F:uracil DNA N-glycosylase activity; F:hydrolase activity; F:hydrolase activity, acting on glycosyl bonds; F:hydrolase activity, hydrolyzing N-glycosyl compounds; C:cytoplasm	COG0692@1|root,COG0692@2|Bacteria,1MV80@1224|Proteobacteria,2VHN3@28216|Betaproteobacteria,1K2DV@119060|Burkholderiaceae	L	Excises uracil residues from the DNA which can arise as a result of misincorporation of dUMP residues by DNA polymerase or due to deamination of cytosine	K03648	UNG, UDG; uracil-DNA glycosylase	[EC:3.2.2.27]	DNA repair and recombination proteins	Protein families: genetic information processing	Brite Hierarchies	PF03167	Uracil DNA glycosylase superfamily
257sh-1	chromosome	chromosome:1	EXE55_RS12210	IS5 family transposase	3	P:GO:0006313; F:GO:0003677; F:GO:0004803	P:transposition, DNA-mediated; F:DNA binding; F:transposase activity	COG3293@1|root,COG3293@2|Bacteria,1REUV@1224|Proteobacteria,2VREC@28216|Betaproteobacteria,1K6P0@119060|Burkholderiaceae	L	transposase							PF13340	Putative transposase of IS4/5 family (DUF4096)
257sh-1	chromosome	chromosome:1	EXE55_RS12210	IS5 family transposase	3	P:GO:0006313; F:GO:0003677; F:GO:0004803	P:transposition, DNA-mediated; F:DNA binding; F:transposase activity	COG3293@1|root,COG3293@2|Bacteria,1REUV@1224|Proteobacteria,2VREC@28216|Betaproteobacteria,1K6P0@119060|Burkholderiaceae	L	transposase							PF01609	Transposase DDE domain
257sh-1	chromosome	chromosome:1	EXE55_RS12355	NUDIX domain-containing protein	1	F:GO:0016787	F:hydrolase activity	COG0494@1|root,COG0494@2|Bacteria,1RCZM@1224|Proteobacteria,2VHTP@28216|Betaproteobacteria,1K70J@119060|Burkholderiaceae	L	Belongs to the Nudix hydrolase family	K03574	mutT, NUDT15, MTH2; 8-oxo-dGTP diphosphatase	[EC:3.6.1.55]	DNA repair and recombination proteins	Protein families: genetic information processing	Brite Hierarchies	PF00293	NUDIX domain
257sh-1	chromosome	chromosome:1	EXE55_RS12470	ribonucleoside-diphosphate reductase subunit alpha	7	P:GO:0006260; P:GO:0008152; F:GO:0000166; F:GO:0003824; F:GO:0004748; F:GO:0005524; F:GO:0016491	P:DNA replication; P:metabolic process; F:nucleotide binding; F:catalytic activity; F:ribonucleoside-diphosphate reductase activity, thioredoxin disulfide as acceptor; F:ATP binding; F:oxidoreductase activity	COG0209@1|root,COG0209@2|Bacteria,1MUJ8@1224|Proteobacteria,2VJIV@28216|Betaproteobacteria,1K1JU@119060|Burkholderiaceae	F	Provides the precursors necessary for DNA synthesis. Catalyzes the biosynthesis of deoxyribonucleotides from the corresponding ribonucleotides	K00525	E1.17.4.1A, nrdA, nrdE; ribonucleoside-diphosphate reductase alpha chain	[EC:1.17.4.1]	DNA repair and recombination proteins	Protein families: genetic information processing	Brite Hierarchies	PF00317	Ribonucleotide reductase, all-alpha domain
257sh-1	chromosome	chromosome:1	EXE55_RS12470	ribonucleoside-diphosphate reductase subunit alpha	7	P:GO:0006260; P:GO:0008152; F:GO:0000166; F:GO:0003824; F:GO:0004748; F:GO:0005524; F:GO:0016491	P:DNA replication; P:metabolic process; F:nucleotide binding; F:catalytic activity; F:ribonucleoside-diphosphate reductase activity, thioredoxin disulfide as acceptor; F:ATP binding; F:oxidoreductase activity	COG0209@1|root,COG0209@2|Bacteria,1MUJ8@1224|Proteobacteria,2VJIV@28216|Betaproteobacteria,1K1JU@119060|Burkholderiaceae	F	Provides the precursors necessary for DNA synthesis. Catalyzes the biosynthesis of deoxyribonucleotides from the corresponding ribonucleotides	K00525	E1.17.4.1A, nrdA, nrdE; ribonucleoside-diphosphate reductase alpha chain	[EC:1.17.4.1]	DNA repair and recombination proteins	Protein families: genetic information processing	Brite Hierarchies	PF02867	Ribonucleotide reductase, barrel domain
257sh-1	chromosome	chromosome:1	EXE55_RS12470	ribonucleoside-diphosphate reductase subunit alpha	7	P:GO:0006260; P:GO:0008152; F:GO:0000166; F:GO:0003824; F:GO:0004748; F:GO:0005524; F:GO:0016491	P:DNA replication; P:metabolic process; F:nucleotide binding; F:catalytic activity; F:ribonucleoside-diphosphate reductase activity, thioredoxin disulfide as acceptor; F:ATP binding; F:oxidoreductase activity	COG0209@1|root,COG0209@2|Bacteria,1MUJ8@1224|Proteobacteria,2VJIV@28216|Betaproteobacteria,1K1JU@119060|Burkholderiaceae	F	Provides the precursors necessary for DNA synthesis. Catalyzes the biosynthesis of deoxyribonucleotides from the corresponding ribonucleotides	K00525	E1.17.4.1A, nrdA, nrdE; ribonucleoside-diphosphate reductase alpha chain	[EC:1.17.4.1]	DNA repair and recombination proteins	Protein families: genetic information processing	Brite Hierarchies	PF03477	ATP cone domain
257sh-1	chromosome	chromosome:1	EXE55_RS12475	ribonucleotide-diphosphate reductase subunit beta	7	P:GO:0006260; P:GO:0009263; F:GO:0004748; F:GO:0016491; F:GO:0046872; C:GO:0016020; C:GO:0016021	P:DNA replication; P:deoxyribonucleotide biosynthetic process; F:ribonucleoside-diphosphate reductase activity, thioredoxin disulfide as acceptor; F:oxidoreductase activity; F:metal ion binding; C:membrane; C:integral component of membrane	COG0208@1|root,COG0208@2|Bacteria,1MWUS@1224|Proteobacteria,2VI7U@28216|Betaproteobacteria,1K06J@119060|Burkholderiaceae	F	Provides the precursors necessary for DNA synthesis. Catalyzes the biosynthesis of deoxyribonucleotides from the corresponding ribonucleotides	K00526	E1.17.4.1B, nrdB, nrdF; ribonucleoside-diphosphate reductase beta chain	[EC:1.17.4.1]	DNA repair and recombination proteins	Protein families: genetic information processing	Brite Hierarchies	PF00268	Ribonucleotide reductase, small chain
257sh-1	chromosome	chromosome:1	EXE55_RS12720	DNA polymerase III subunit delta	7	P:GO:0006260; P:GO:0071897; F:GO:0003677; F:GO:0003887; F:GO:0016740; F:GO:0016779; C:GO:0009360	P:DNA replication; P:DNA biosynthetic process; F:DNA binding; F:DNA-directed DNA polymerase activity; F:transferase activity; F:nucleotidyltransferase activity; C:DNA polymerase III complex	COG1466@1|root,COG1466@2|Bacteria,1MWYT@1224|Proteobacteria,2VIKX@28216|Betaproteobacteria,1K2MD@119060|Burkholderiaceae	L	DNA polymerase III delta subunit	K02340	holA; DNA polymerase III subunit delta	[EC:2.7.7.7]	Homologous recombination	Replication and repair	Genetic Information Processing	PF14840	Processivity clamp loader gamma complex DNA pol III C-term
257sh-1	chromosome	chromosome:1	EXE55_RS12720	DNA polymerase III subunit delta	7	P:GO:0006260; P:GO:0071897; F:GO:0003677; F:GO:0003887; F:GO:0016740; F:GO:0016779; C:GO:0009360	P:DNA replication; P:DNA biosynthetic process; F:DNA binding; F:DNA-directed DNA polymerase activity; F:transferase activity; F:nucleotidyltransferase activity; C:DNA polymerase III complex	COG1466@1|root,COG1466@2|Bacteria,1MWYT@1224|Proteobacteria,2VIKX@28216|Betaproteobacteria,1K2MD@119060|Burkholderiaceae	L	DNA polymerase III delta subunit	K02340	holA; DNA polymerase III subunit delta	[EC:2.7.7.7]	Homologous recombination	Replication and repair	Genetic Information Processing	PF06144	DNA polymerase III, delta subunit
257sh-1	chromosome	chromosome:1	EXE55_RS12720	DNA polymerase III subunit delta	7	P:GO:0006260; P:GO:0071897; F:GO:0003677; F:GO:0003887; F:GO:0016740; F:GO:0016779; C:GO:0009360	P:DNA replication; P:DNA biosynthetic process; F:DNA binding; F:DNA-directed DNA polymerase activity; F:transferase activity; F:nucleotidyltransferase activity; C:DNA polymerase III complex	COG1466@1|root,COG1466@2|Bacteria,1MWYT@1224|Proteobacteria,2VIKX@28216|Betaproteobacteria,1K2MD@119060|Burkholderiaceae	L	DNA polymerase III delta subunit	K02340	holA; DNA polymerase III subunit delta	[EC:2.7.7.7]	DNA repair and recombination proteins	Protein families: genetic information processing	Brite Hierarchies	PF14840	Processivity clamp loader gamma complex DNA pol III C-term
257sh-1	chromosome	chromosome:1	EXE55_RS12720	DNA polymerase III subunit delta	7	P:GO:0006260; P:GO:0071897; F:GO:0003677; F:GO:0003887; F:GO:0016740; F:GO:0016779; C:GO:0009360	P:DNA replication; P:DNA biosynthetic process; F:DNA binding; F:DNA-directed DNA polymerase activity; F:transferase activity; F:nucleotidyltransferase activity; C:DNA polymerase III complex	COG1466@1|root,COG1466@2|Bacteria,1MWYT@1224|Proteobacteria,2VIKX@28216|Betaproteobacteria,1K2MD@119060|Burkholderiaceae	L	DNA polymerase III delta subunit	K02340	holA; DNA polymerase III subunit delta	[EC:2.7.7.7]	DNA repair and recombination proteins	Protein families: genetic information processing	Brite Hierarchies	PF06144	DNA polymerase III, delta subunit
257sh-1	chromosome	chromosome:1	EXE55_RS12865	Holliday junction branch migration DNA helicase RuvB	13	P:GO:0006281; P:GO:0006310; P:GO:0006974; P:GO:0009432; P:GO:0032508; F:GO:0000166; F:GO:0003677; F:GO:0003678; F:GO:0004386; F:GO:0005524; F:GO:0009378; F:GO:0016787; F:GO:0016887	P:DNA repair; P:DNA recombination; P:cellular response to DNA damage stimulus; P:SOS response; P:DNA duplex unwinding; F:nucleotide binding; F:DNA binding; F:DNA helicase activity; F:helicase activity; F:ATP binding; F:four-way junction helicase activity; F:hydrolase activity; F:ATP hydrolysis activity	COG2255@1|root,COG2255@2|Bacteria,1MU38@1224|Proteobacteria,2VH0J@28216|Betaproteobacteria,1K2TQ@119060|Burkholderiaceae	L	The RuvA-RuvB complex in the presence of ATP renatures cruciform structure in supercoiled DNA with palindromic sequence, indicating that it may promote strand exchange reactions in homologous recombination. RuvAB is a helicase that mediates the Holliday junction migration by localized denaturation and reannealing	K03551	ruvB; holliday junction DNA helicase RuvB	[EC:5.6.2.4]	Homologous recombination	Replication and repair	Genetic Information Processing	PF17864	RuvB AAA lid domain
257sh-1	chromosome	chromosome:1	EXE55_RS12865	Holliday junction branch migration DNA helicase RuvB	13	P:GO:0006281; P:GO:0006310; P:GO:0006974; P:GO:0009432; P:GO:0032508; F:GO:0000166; F:GO:0003677; F:GO:0003678; F:GO:0004386; F:GO:0005524; F:GO:0009378; F:GO:0016787; F:GO:0016887	P:DNA repair; P:DNA recombination; P:cellular response to DNA damage stimulus; P:SOS response; P:DNA duplex unwinding; F:nucleotide binding; F:DNA binding; F:DNA helicase activity; F:helicase activity; F:ATP binding; F:four-way junction helicase activity; F:hydrolase activity; F:ATP hydrolysis activity	COG2255@1|root,COG2255@2|Bacteria,1MU38@1224|Proteobacteria,2VH0J@28216|Betaproteobacteria,1K2TQ@119060|Burkholderiaceae	L	The RuvA-RuvB complex in the presence of ATP renatures cruciform structure in supercoiled DNA with palindromic sequence, indicating that it may promote strand exchange reactions in homologous recombination. RuvAB is a helicase that mediates the Holliday junction migration by localized denaturation and reannealing	K03551	ruvB; holliday junction DNA helicase RuvB	[EC:5.6.2.4]	Homologous recombination	Replication and repair	Genetic Information Processing	PF05496	Holliday junction DNA helicase RuvB P-loop domain
257sh-1	chromosome	chromosome:1	EXE55_RS12865	Holliday junction branch migration DNA helicase RuvB	13	P:GO:0006281; P:GO:0006310; P:GO:0006974; P:GO:0009432; P:GO:0032508; F:GO:0000166; F:GO:0003677; F:GO:0003678; F:GO:0004386; F:GO:0005524; F:GO:0009378; F:GO:0016787; F:GO:0016887	P:DNA repair; P:DNA recombination; P:cellular response to DNA damage stimulus; P:SOS response; P:DNA duplex unwinding; F:nucleotide binding; F:DNA binding; F:DNA helicase activity; F:helicase activity; F:ATP binding; F:four-way junction helicase activity; F:hydrolase activity; F:ATP hydrolysis activity	COG2255@1|root,COG2255@2|Bacteria,1MU38@1224|Proteobacteria,2VH0J@28216|Betaproteobacteria,1K2TQ@119060|Burkholderiaceae	L	The RuvA-RuvB complex in the presence of ATP renatures cruciform structure in supercoiled DNA with palindromic sequence, indicating that it may promote strand exchange reactions in homologous recombination. RuvAB is a helicase that mediates the Holliday junction migration by localized denaturation and reannealing	K03551	ruvB; holliday junction DNA helicase RuvB	[EC:5.6.2.4]	Homologous recombination	Replication and repair	Genetic Information Processing	PF05491	RuvB C-terminal winged helix domain
257sh-1	chromosome	chromosome:1	EXE55_RS12865	Holliday junction branch migration DNA helicase RuvB	13	P:GO:0006281; P:GO:0006310; P:GO:0006974; P:GO:0009432; P:GO:0032508; F:GO:0000166; F:GO:0003677; F:GO:0003678; F:GO:0004386; F:GO:0005524; F:GO:0009378; F:GO:0016787; F:GO:0016887	P:DNA repair; P:DNA recombination; P:cellular response to DNA damage stimulus; P:SOS response; P:DNA duplex unwinding; F:nucleotide binding; F:DNA binding; F:DNA helicase activity; F:helicase activity; F:ATP binding; F:four-way junction helicase activity; F:hydrolase activity; F:ATP hydrolysis activity	COG2255@1|root,COG2255@2|Bacteria,1MU38@1224|Proteobacteria,2VH0J@28216|Betaproteobacteria,1K2TQ@119060|Burkholderiaceae	L	The RuvA-RuvB complex in the presence of ATP renatures cruciform structure in supercoiled DNA with palindromic sequence, indicating that it may promote strand exchange reactions in homologous recombination. RuvAB is a helicase that mediates the Holliday junction migration by localized denaturation and reannealing	K03551	ruvB; holliday junction DNA helicase RuvB	[EC:5.6.2.4]	DNA repair and recombination proteins	Protein families: genetic information processing	Brite Hierarchies	PF17864	RuvB AAA lid domain
257sh-1	chromosome	chromosome:1	EXE55_RS12865	Holliday junction branch migration DNA helicase RuvB	13	P:GO:0006281; P:GO:0006310; P:GO:0006974; P:GO:0009432; P:GO:0032508; F:GO:0000166; F:GO:0003677; F:GO:0003678; F:GO:0004386; F:GO:0005524; F:GO:0009378; F:GO:0016787; F:GO:0016887	P:DNA repair; P:DNA recombination; P:cellular response to DNA damage stimulus; P:SOS response; P:DNA duplex unwinding; F:nucleotide binding; F:DNA binding; F:DNA helicase activity; F:helicase activity; F:ATP binding; F:four-way junction helicase activity; F:hydrolase activity; F:ATP hydrolysis activity	COG2255@1|root,COG2255@2|Bacteria,1MU38@1224|Proteobacteria,2VH0J@28216|Betaproteobacteria,1K2TQ@119060|Burkholderiaceae	L	The RuvA-RuvB complex in the presence of ATP renatures cruciform structure in supercoiled DNA with palindromic sequence, indicating that it may promote strand exchange reactions in homologous recombination. RuvAB is a helicase that mediates the Holliday junction migration by localized denaturation and reannealing	K03551	ruvB; holliday junction DNA helicase RuvB	[EC:5.6.2.4]	DNA repair and recombination proteins	Protein families: genetic information processing	Brite Hierarchies	PF05496	Holliday junction DNA helicase RuvB P-loop domain
257sh-1	chromosome	chromosome:1	EXE55_RS12865	Holliday junction branch migration DNA helicase RuvB	13	P:GO:0006281; P:GO:0006310; P:GO:0006974; P:GO:0009432; P:GO:0032508; F:GO:0000166; F:GO:0003677; F:GO:0003678; F:GO:0004386; F:GO:0005524; F:GO:0009378; F:GO:0016787; F:GO:0016887	P:DNA repair; P:DNA recombination; P:cellular response to DNA damage stimulus; P:SOS response; P:DNA duplex unwinding; F:nucleotide binding; F:DNA binding; F:DNA helicase activity; F:helicase activity; F:ATP binding; F:four-way junction helicase activity; F:hydrolase activity; F:ATP hydrolysis activity	COG2255@1|root,COG2255@2|Bacteria,1MU38@1224|Proteobacteria,2VH0J@28216|Betaproteobacteria,1K2TQ@119060|Burkholderiaceae	L	The RuvA-RuvB complex in the presence of ATP renatures cruciform structure in supercoiled DNA with palindromic sequence, indicating that it may promote strand exchange reactions in homologous recombination. RuvAB is a helicase that mediates the Holliday junction migration by localized denaturation and reannealing	K03551	ruvB; holliday junction DNA helicase RuvB	[EC:5.6.2.4]	DNA repair and recombination proteins	Protein families: genetic information processing	Brite Hierarchies	PF05491	RuvB C-terminal winged helix domain
257sh-1	chromosome	chromosome:1	EXE55_RS12870	Holliday junction branch migration protein RuvA	14	P:GO:0006281; P:GO:0006310; P:GO:0006974; P:GO:0009432; P:GO:0032508; F:GO:0000166; F:GO:0003677; F:GO:0003678; F:GO:0004386; F:GO:0005524; F:GO:0009378; F:GO:0016787; F:GO:0016887; C:GO:0009379	P:DNA repair; P:DNA recombination; P:cellular response to DNA damage stimulus; P:SOS response; P:DNA duplex unwinding; F:nucleotide binding; F:DNA binding; F:DNA helicase activity; F:helicase activity; F:ATP binding; F:four-way junction helicase activity; F:hydrolase activity; F:ATP hydrolysis activity; C:Holliday junction helicase complex	COG0632@1|root,COG0632@2|Bacteria,1MWJR@1224|Proteobacteria,2VJ98@28216|Betaproteobacteria,1K0EV@119060|Burkholderiaceae	L	The RuvA-RuvB complex in the presence of ATP renatures cruciform structure in supercoiled DNA with palindromic sequence, indicating that it may promote strand exchange reactions in homologous recombination. RuvAB is a helicase that mediates the Holliday junction migration by localized denaturation and reannealing. RuvA stimulates, in the presence of DNA, the weak ATPase activity of RuvB	K03550	ruvA; holliday junction DNA helicase RuvA	[EC:5.6.2.4]	Homologous recombination	Replication and repair	Genetic Information Processing	PF07499	RuvA, C-terminal domain
257sh-1	chromosome	chromosome:1	EXE55_RS12870	Holliday junction branch migration protein RuvA	14	P:GO:0006281; P:GO:0006310; P:GO:0006974; P:GO:0009432; P:GO:0032508; F:GO:0000166; F:GO:0003677; F:GO:0003678; F:GO:0004386; F:GO:0005524; F:GO:0009378; F:GO:0016787; F:GO:0016887; C:GO:0009379	P:DNA repair; P:DNA recombination; P:cellular response to DNA damage stimulus; P:SOS response; P:DNA duplex unwinding; F:nucleotide binding; F:DNA binding; F:DNA helicase activity; F:helicase activity; F:ATP binding; F:four-way junction helicase activity; F:hydrolase activity; F:ATP hydrolysis activity; C:Holliday junction helicase complex	COG0632@1|root,COG0632@2|Bacteria,1MWJR@1224|Proteobacteria,2VJ98@28216|Betaproteobacteria,1K0EV@119060|Burkholderiaceae	L	The RuvA-RuvB complex in the presence of ATP renatures cruciform structure in supercoiled DNA with palindromic sequence, indicating that it may promote strand exchange reactions in homologous recombination. RuvAB is a helicase that mediates the Holliday junction migration by localized denaturation and reannealing. RuvA stimulates, in the presence of DNA, the weak ATPase activity of RuvB	K03550	ruvA; holliday junction DNA helicase RuvA	[EC:5.6.2.4]	Homologous recombination	Replication and repair	Genetic Information Processing	PF14520	Helix-hairpin-helix domain
257sh-1	chromosome	chromosome:1	EXE55_RS12870	Holliday junction branch migration protein RuvA	14	P:GO:0006281; P:GO:0006310; P:GO:0006974; P:GO:0009432; P:GO:0032508; F:GO:0000166; F:GO:0003677; F:GO:0003678; F:GO:0004386; F:GO:0005524; F:GO:0009378; F:GO:0016787; F:GO:0016887; C:GO:0009379	P:DNA repair; P:DNA recombination; P:cellular response to DNA damage stimulus; P:SOS response; P:DNA duplex unwinding; F:nucleotide binding; F:DNA binding; F:DNA helicase activity; F:helicase activity; F:ATP binding; F:four-way junction helicase activity; F:hydrolase activity; F:ATP hydrolysis activity; C:Holliday junction helicase complex	COG0632@1|root,COG0632@2|Bacteria,1MWJR@1224|Proteobacteria,2VJ98@28216|Betaproteobacteria,1K0EV@119060|Burkholderiaceae	L	The RuvA-RuvB complex in the presence of ATP renatures cruciform structure in supercoiled DNA with palindromic sequence, indicating that it may promote strand exchange reactions in homologous recombination. RuvAB is a helicase that mediates the Holliday junction migration by localized denaturation and reannealing. RuvA stimulates, in the presence of DNA, the weak ATPase activity of RuvB	K03550	ruvA; holliday junction DNA helicase RuvA	[EC:5.6.2.4]	Homologous recombination	Replication and repair	Genetic Information Processing	PF01330	RuvA N terminal domain
257sh-1	chromosome	chromosome:1	EXE55_RS12870	Holliday junction branch migration protein RuvA	14	P:GO:0006281; P:GO:0006310; P:GO:0006974; P:GO:0009432; P:GO:0032508; F:GO:0000166; F:GO:0003677; F:GO:0003678; F:GO:0004386; F:GO:0005524; F:GO:0009378; F:GO:0016787; F:GO:0016887; C:GO:0009379	P:DNA repair; P:DNA recombination; P:cellular response to DNA damage stimulus; P:SOS response; P:DNA duplex unwinding; F:nucleotide binding; F:DNA binding; F:DNA helicase activity; F:helicase activity; F:ATP binding; F:four-way junction helicase activity; F:hydrolase activity; F:ATP hydrolysis activity; C:Holliday junction helicase complex	COG0632@1|root,COG0632@2|Bacteria,1MWJR@1224|Proteobacteria,2VJ98@28216|Betaproteobacteria,1K0EV@119060|Burkholderiaceae	L	The RuvA-RuvB complex in the presence of ATP renatures cruciform structure in supercoiled DNA with palindromic sequence, indicating that it may promote strand exchange reactions in homologous recombination. RuvAB is a helicase that mediates the Holliday junction migration by localized denaturation and reannealing. RuvA stimulates, in the presence of DNA, the weak ATPase activity of RuvB	K03550	ruvA; holliday junction DNA helicase RuvA	[EC:5.6.2.4]	DNA repair and recombination proteins	Protein families: genetic information processing	Brite Hierarchies	PF07499	RuvA, C-terminal domain
257sh-1	chromosome	chromosome:1	EXE55_RS12870	Holliday junction branch migration protein RuvA	14	P:GO:0006281; P:GO:0006310; P:GO:0006974; P:GO:0009432; P:GO:0032508; F:GO:0000166; F:GO:0003677; F:GO:0003678; F:GO:0004386; F:GO:0005524; F:GO:0009378; F:GO:0016787; F:GO:0016887; C:GO:0009379	P:DNA repair; P:DNA recombination; P:cellular response to DNA damage stimulus; P:SOS response; P:DNA duplex unwinding; F:nucleotide binding; F:DNA binding; F:DNA helicase activity; F:helicase activity; F:ATP binding; F:four-way junction helicase activity; F:hydrolase activity; F:ATP hydrolysis activity; C:Holliday junction helicase complex	COG0632@1|root,COG0632@2|Bacteria,1MWJR@1224|Proteobacteria,2VJ98@28216|Betaproteobacteria,1K0EV@119060|Burkholderiaceae	L	The RuvA-RuvB complex in the presence of ATP renatures cruciform structure in supercoiled DNA with palindromic sequence, indicating that it may promote strand exchange reactions in homologous recombination. RuvAB is a helicase that mediates the Holliday junction migration by localized denaturation and reannealing. RuvA stimulates, in the presence of DNA, the weak ATPase activity of RuvB	K03550	ruvA; holliday junction DNA helicase RuvA	[EC:5.6.2.4]	DNA repair and recombination proteins	Protein families: genetic information processing	Brite Hierarchies	PF14520	Helix-hairpin-helix domain
257sh-1	chromosome	chromosome:1	EXE55_RS12870	Holliday junction branch migration protein RuvA	14	P:GO:0006281; P:GO:0006310; P:GO:0006974; P:GO:0009432; P:GO:0032508; F:GO:0000166; F:GO:0003677; F:GO:0003678; F:GO:0004386; F:GO:0005524; F:GO:0009378; F:GO:0016787; F:GO:0016887; C:GO:0009379	P:DNA repair; P:DNA recombination; P:cellular response to DNA damage stimulus; P:SOS response; P:DNA duplex unwinding; F:nucleotide binding; F:DNA binding; F:DNA helicase activity; F:helicase activity; F:ATP binding; F:four-way junction helicase activity; F:hydrolase activity; F:ATP hydrolysis activity; C:Holliday junction helicase complex	COG0632@1|root,COG0632@2|Bacteria,1MWJR@1224|Proteobacteria,2VJ98@28216|Betaproteobacteria,1K0EV@119060|Burkholderiaceae	L	The RuvA-RuvB complex in the presence of ATP renatures cruciform structure in supercoiled DNA with palindromic sequence, indicating that it may promote strand exchange reactions in homologous recombination. RuvAB is a helicase that mediates the Holliday junction migration by localized denaturation and reannealing. RuvA stimulates, in the presence of DNA, the weak ATPase activity of RuvB	K03550	ruvA; holliday junction DNA helicase RuvA	[EC:5.6.2.4]	DNA repair and recombination proteins	Protein families: genetic information processing	Brite Hierarchies	PF01330	RuvA N terminal domain
257sh-1	chromosome	chromosome:1	EXE55_RS12875	crossover junction endodeoxyribonuclease RuvC	11	P:GO:0006281; P:GO:0006310; P:GO:0006974; P:GO:0090305; F:GO:0000287; F:GO:0003676; F:GO:0004518; F:GO:0004520; F:GO:0008821; F:GO:0016787; F:GO:0046872	P:DNA repair; P:DNA recombination; P:cellular response to DNA damage stimulus; P:nucleic acid phosphodiester bond hydrolysis; F:magnesium ion binding; F:nucleic acid binding; F:nuclease activity; F:endodeoxyribonuclease activity; F:crossover junction endodeoxyribonuclease activity; F:hydrolase activity; F:metal ion binding	COG0817@1|root,COG0817@2|Bacteria,1MUJI@1224|Proteobacteria,2VQ3U@28216|Betaproteobacteria,1K0TT@119060|Burkholderiaceae	L	Nuclease that resolves Holliday junction intermediates in genetic recombination. Cleaves the cruciform structure in supercoiled DNA by nicking to strands with the same polarity at sites symmetrically opposed at the junction in the homologous arms and leaves a 5'-terminal phosphate and a 3'-terminal hydroxyl group	K01159	ruvC; crossover junction endodeoxyribonuclease RuvC	[EC:3.1.21.10]	Homologous recombination	Replication and repair	Genetic Information Processing	PF02075	Crossover junction endodeoxyribonuclease RuvC
257sh-1	chromosome	chromosome:1	EXE55_RS12875	crossover junction endodeoxyribonuclease RuvC	11	P:GO:0006281; P:GO:0006310; P:GO:0006974; P:GO:0090305; F:GO:0000287; F:GO:0003676; F:GO:0004518; F:GO:0004520; F:GO:0008821; F:GO:0016787; F:GO:0046872	P:DNA repair; P:DNA recombination; P:cellular response to DNA damage stimulus; P:nucleic acid phosphodiester bond hydrolysis; F:magnesium ion binding; F:nucleic acid binding; F:nuclease activity; F:endodeoxyribonuclease activity; F:crossover junction endodeoxyribonuclease activity; F:hydrolase activity; F:metal ion binding	COG0817@1|root,COG0817@2|Bacteria,1MUJI@1224|Proteobacteria,2VQ3U@28216|Betaproteobacteria,1K0TT@119060|Burkholderiaceae	L	Nuclease that resolves Holliday junction intermediates in genetic recombination. Cleaves the cruciform structure in supercoiled DNA by nicking to strands with the same polarity at sites symmetrically opposed at the junction in the homologous arms and leaves a 5'-terminal phosphate and a 3'-terminal hydroxyl group	K01159	ruvC; crossover junction endodeoxyribonuclease RuvC	[EC:3.1.21.10]	DNA repair and recombination proteins	Protein families: genetic information processing	Brite Hierarchies	PF02075	Crossover junction endodeoxyribonuclease RuvC
257sh-1	chromosome	chromosome:1	EXE55_RS12885	Fis family transcriptional regulator	3	P:GO:0006355; F:GO:0003677; F:GO:0043565	P:regulation of transcription, DNA-templated; F:DNA binding; F:sequence-specific DNA binding	COG2901@1|root,COG2901@2|Bacteria,1N7MJ@1224|Proteobacteria,2VVQK@28216|Betaproteobacteria,1K9CE@119060|Burkholderiaceae	KL	Belongs to the transcriptional regulatory Fis family	K03557	fis; Fis family transcriptional regulator, factor for inversion stimulation protein		DNA repair and recombination proteins	Protein families: genetic information processing	Brite Hierarchies	PF02954	Bacterial regulatory protein, Fis family
257sh-1	chromosome	chromosome:1	EXE55_RS12950	site-specific recombinase	2	C:GO:0016020; C:GO:0016021	C:membrane; C:integral component of membrane	COG4389@1|root,COG4389@2|Bacteria,1MWEH@1224|Proteobacteria,2VIZV@28216|Betaproteobacteria,1K4BX@119060|Burkholderiaceae	L	site-specific recombinase							PF10136	Site-specific recombinase
257sh-1	chromosome	chromosome:1	EXE55_RS13015	ATP-dependent DNA helicase RecG	12	P:GO:0006281; P:GO:0006310; P:GO:0006974; P:GO:0032508; F:GO:0000166; F:GO:0003676; F:GO:0003678; F:GO:0004386; F:GO:0005524; F:GO:0008094; F:GO:0016787; F:GO:0016887	P:DNA repair; P:DNA recombination; P:cellular response to DNA damage stimulus; P:DNA duplex unwinding; F:nucleotide binding; F:nucleic acid binding; F:DNA helicase activity; F:helicase activity; F:ATP binding; F:ATP-dependent activity, acting on DNA; F:hydrolase activity; F:ATP hydrolysis activity	COG1200@1|root,COG1200@2|Bacteria,1MWN2@1224|Proteobacteria,2VHE8@28216|Betaproteobacteria,1K143@119060|Burkholderiaceae	L	Critical role in recombination and DNA repair. Helps process Holliday junction intermediates to mature products by catalyzing branch migration. Has a DNA unwinding activity characteristic of a DNA helicase with a 3'- to 5'- polarity. Unwinds branched duplex DNA (Y-DNA)	K03655	recG; ATP-dependent DNA helicase RecG	[EC:5.6.2.4]	Homologous recombination	Replication and repair	Genetic Information Processing	PF17191	RecG wedge domain
257sh-1	chromosome	chromosome:1	EXE55_RS13015	ATP-dependent DNA helicase RecG	12	P:GO:0006281; P:GO:0006310; P:GO:0006974; P:GO:0032508; F:GO:0000166; F:GO:0003676; F:GO:0003678; F:GO:0004386; F:GO:0005524; F:GO:0008094; F:GO:0016787; F:GO:0016887	P:DNA repair; P:DNA recombination; P:cellular response to DNA damage stimulus; P:DNA duplex unwinding; F:nucleotide binding; F:nucleic acid binding; F:DNA helicase activity; F:helicase activity; F:ATP binding; F:ATP-dependent activity, acting on DNA; F:hydrolase activity; F:ATP hydrolysis activity	COG1200@1|root,COG1200@2|Bacteria,1MWN2@1224|Proteobacteria,2VHE8@28216|Betaproteobacteria,1K143@119060|Burkholderiaceae	L	Critical role in recombination and DNA repair. Helps process Holliday junction intermediates to mature products by catalyzing branch migration. Has a DNA unwinding activity characteristic of a DNA helicase with a 3'- to 5'- polarity. Unwinds branched duplex DNA (Y-DNA)	K03655	recG; ATP-dependent DNA helicase RecG	[EC:5.6.2.4]	Homologous recombination	Replication and repair	Genetic Information Processing	PF19833	ATP-dependent DNA helicase RecG C-terminal
257sh-1	chromosome	chromosome:1	EXE55_RS13015	ATP-dependent DNA helicase RecG	12	P:GO:0006281; P:GO:0006310; P:GO:0006974; P:GO:0032508; F:GO:0000166; F:GO:0003676; F:GO:0003678; F:GO:0004386; F:GO:0005524; F:GO:0008094; F:GO:0016787; F:GO:0016887	P:DNA repair; P:DNA recombination; P:cellular response to DNA damage stimulus; P:DNA duplex unwinding; F:nucleotide binding; F:nucleic acid binding; F:DNA helicase activity; F:helicase activity; F:ATP binding; F:ATP-dependent activity, acting on DNA; F:hydrolase activity; F:ATP hydrolysis activity	COG1200@1|root,COG1200@2|Bacteria,1MWN2@1224|Proteobacteria,2VHE8@28216|Betaproteobacteria,1K143@119060|Burkholderiaceae	L	Critical role in recombination and DNA repair. Helps process Holliday junction intermediates to mature products by catalyzing branch migration. Has a DNA unwinding activity characteristic of a DNA helicase with a 3'- to 5'- polarity. Unwinds branched duplex DNA (Y-DNA)	K03655	recG; ATP-dependent DNA helicase RecG	[EC:5.6.2.4]	Homologous recombination	Replication and repair	Genetic Information Processing	PF00271	Helicase conserved C-terminal domain
257sh-1	chromosome	chromosome:1	EXE55_RS13015	ATP-dependent DNA helicase RecG	12	P:GO:0006281; P:GO:0006310; P:GO:0006974; P:GO:0032508; F:GO:0000166; F:GO:0003676; F:GO:0003678; F:GO:0004386; F:GO:0005524; F:GO:0008094; F:GO:0016787; F:GO:0016887	P:DNA repair; P:DNA recombination; P:cellular response to DNA damage stimulus; P:DNA duplex unwinding; F:nucleotide binding; F:nucleic acid binding; F:DNA helicase activity; F:helicase activity; F:ATP binding; F:ATP-dependent activity, acting on DNA; F:hydrolase activity; F:ATP hydrolysis activity	COG1200@1|root,COG1200@2|Bacteria,1MWN2@1224|Proteobacteria,2VHE8@28216|Betaproteobacteria,1K143@119060|Burkholderiaceae	L	Critical role in recombination and DNA repair. Helps process Holliday junction intermediates to mature products by catalyzing branch migration. Has a DNA unwinding activity characteristic of a DNA helicase with a 3'- to 5'- polarity. Unwinds branched duplex DNA (Y-DNA)	K03655	recG; ATP-dependent DNA helicase RecG	[EC:5.6.2.4]	Homologous recombination	Replication and repair	Genetic Information Processing	PF00270	DEAD/DEAH box helicase
257sh-1	chromosome	chromosome:1	EXE55_RS13015	ATP-dependent DNA helicase RecG	12	P:GO:0006281; P:GO:0006310; P:GO:0006974; P:GO:0032508; F:GO:0000166; F:GO:0003676; F:GO:0003678; F:GO:0004386; F:GO:0005524; F:GO:0008094; F:GO:0016787; F:GO:0016887	P:DNA repair; P:DNA recombination; P:cellular response to DNA damage stimulus; P:DNA duplex unwinding; F:nucleotide binding; F:nucleic acid binding; F:DNA helicase activity; F:helicase activity; F:ATP binding; F:ATP-dependent activity, acting on DNA; F:hydrolase activity; F:ATP hydrolysis activity	COG1200@1|root,COG1200@2|Bacteria,1MWN2@1224|Proteobacteria,2VHE8@28216|Betaproteobacteria,1K143@119060|Burkholderiaceae	L	Critical role in recombination and DNA repair. Helps process Holliday junction intermediates to mature products by catalyzing branch migration. Has a DNA unwinding activity characteristic of a DNA helicase with a 3'- to 5'- polarity. Unwinds branched duplex DNA (Y-DNA)	K03655	recG; ATP-dependent DNA helicase RecG	[EC:5.6.2.4]	DNA repair and recombination proteins	Protein families: genetic information processing	Brite Hierarchies	PF17191	RecG wedge domain
257sh-1	chromosome	chromosome:1	EXE55_RS13015	ATP-dependent DNA helicase RecG	12	P:GO:0006281; P:GO:0006310; P:GO:0006974; P:GO:0032508; F:GO:0000166; F:GO:0003676; F:GO:0003678; F:GO:0004386; F:GO:0005524; F:GO:0008094; F:GO:0016787; F:GO:0016887	P:DNA repair; P:DNA recombination; P:cellular response to DNA damage stimulus; P:DNA duplex unwinding; F:nucleotide binding; F:nucleic acid binding; F:DNA helicase activity; F:helicase activity; F:ATP binding; F:ATP-dependent activity, acting on DNA; F:hydrolase activity; F:ATP hydrolysis activity	COG1200@1|root,COG1200@2|Bacteria,1MWN2@1224|Proteobacteria,2VHE8@28216|Betaproteobacteria,1K143@119060|Burkholderiaceae	L	Critical role in recombination and DNA repair. Helps process Holliday junction intermediates to mature products by catalyzing branch migration. Has a DNA unwinding activity characteristic of a DNA helicase with a 3'- to 5'- polarity. Unwinds branched duplex DNA (Y-DNA)	K03655	recG; ATP-dependent DNA helicase RecG	[EC:5.6.2.4]	DNA repair and recombination proteins	Protein families: genetic information processing	Brite Hierarchies	PF19833	ATP-dependent DNA helicase RecG C-terminal
257sh-1	chromosome	chromosome:1	EXE55_RS13015	ATP-dependent DNA helicase RecG	12	P:GO:0006281; P:GO:0006310; P:GO:0006974; P:GO:0032508; F:GO:0000166; F:GO:0003676; F:GO:0003678; F:GO:0004386; F:GO:0005524; F:GO:0008094; F:GO:0016787; F:GO:0016887	P:DNA repair; P:DNA recombination; P:cellular response to DNA damage stimulus; P:DNA duplex unwinding; F:nucleotide binding; F:nucleic acid binding; F:DNA helicase activity; F:helicase activity; F:ATP binding; F:ATP-dependent activity, acting on DNA; F:hydrolase activity; F:ATP hydrolysis activity	COG1200@1|root,COG1200@2|Bacteria,1MWN2@1224|Proteobacteria,2VHE8@28216|Betaproteobacteria,1K143@119060|Burkholderiaceae	L	Critical role in recombination and DNA repair. Helps process Holliday junction intermediates to mature products by catalyzing branch migration. Has a DNA unwinding activity characteristic of a DNA helicase with a 3'- to 5'- polarity. Unwinds branched duplex DNA (Y-DNA)	K03655	recG; ATP-dependent DNA helicase RecG	[EC:5.6.2.4]	DNA repair and recombination proteins	Protein families: genetic information processing	Brite Hierarchies	PF00271	Helicase conserved C-terminal domain
257sh-1	chromosome	chromosome:1	EXE55_RS13015	ATP-dependent DNA helicase RecG	12	P:GO:0006281; P:GO:0006310; P:GO:0006974; P:GO:0032508; F:GO:0000166; F:GO:0003676; F:GO:0003678; F:GO:0004386; F:GO:0005524; F:GO:0008094; F:GO:0016787; F:GO:0016887	P:DNA repair; P:DNA recombination; P:cellular response to DNA damage stimulus; P:DNA duplex unwinding; F:nucleotide binding; F:nucleic acid binding; F:DNA helicase activity; F:helicase activity; F:ATP binding; F:ATP-dependent activity, acting on DNA; F:hydrolase activity; F:ATP hydrolysis activity	COG1200@1|root,COG1200@2|Bacteria,1MWN2@1224|Proteobacteria,2VHE8@28216|Betaproteobacteria,1K143@119060|Burkholderiaceae	L	Critical role in recombination and DNA repair. Helps process Holliday junction intermediates to mature products by catalyzing branch migration. Has a DNA unwinding activity characteristic of a DNA helicase with a 3'- to 5'- polarity. Unwinds branched duplex DNA (Y-DNA)	K03655	recG; ATP-dependent DNA helicase RecG	[EC:5.6.2.4]	DNA repair and recombination proteins	Protein families: genetic information processing	Brite Hierarchies	PF00270	DEAD/DEAH box helicase
257sh-1	chromosome	chromosome:1	EXE55_RS13100	DNA repair protein RecN	4	P:GO:0006281; P:GO:0006310; P:GO:0006974; F:GO:0005524	P:DNA repair; P:DNA recombination; P:cellular response to DNA damage stimulus; F:ATP binding	COG0497@1|root,COG0497@2|Bacteria,1MUNP@1224|Proteobacteria,2VHHA@28216|Betaproteobacteria,1K174@119060|Burkholderiaceae	L	May be involved in recombinational repair of damaged DNA	K03631	recN; DNA repair protein RecN (Recombination protein N)		DNA repair and recombination proteins	Protein families: genetic information processing	Brite Hierarchies	PF02463	RecF/RecN/SMC N terminal domain
257sh-1	chromosome	chromosome:1	EXE55_RS13185	DNA mismatch repair endonuclease MutL	9	P:GO:0006281; P:GO:0006298; P:GO:0006974; P:GO:0090305; F:GO:0004519; F:GO:0005524; F:GO:0016887; F:GO:0030983; C:GO:0032300	P:DNA repair; P:mismatch repair; P:cellular response to DNA damage stimulus; P:nucleic acid phosphodiester bond hydrolysis; F:endonuclease activity; F:ATP binding; F:ATP hydrolysis activity; F:mismatched DNA binding; C:mismatch repair complex	COG0323@1|root,COG0323@2|Bacteria,1MV61@1224|Proteobacteria,2VIBW@28216|Betaproteobacteria,1JZY0@119060|Burkholderiaceae	L	This protein is involved in the repair of mismatches in DNA. It is required for dam-dependent methyl-directed DNA mismatch repair. May act as a molecular matchmaker , a protein that promotes the formation of a stable complex between two or more DNA-binding proteins in an ATP-dependent manner without itself being part of a final effector complex	K03572	mutL; DNA mismatch repair protein MutL		DNA repair and recombination proteins	Protein families: genetic information processing	Brite Hierarchies	PF08676	MutL C terminal dimerisation domain
257sh-1	chromosome	chromosome:1	EXE55_RS13185	DNA mismatch repair endonuclease MutL	9	P:GO:0006281; P:GO:0006298; P:GO:0006974; P:GO:0090305; F:GO:0004519; F:GO:0005524; F:GO:0016887; F:GO:0030983; C:GO:0032300	P:DNA repair; P:mismatch repair; P:cellular response to DNA damage stimulus; P:nucleic acid phosphodiester bond hydrolysis; F:endonuclease activity; F:ATP binding; F:ATP hydrolysis activity; F:mismatched DNA binding; C:mismatch repair complex	COG0323@1|root,COG0323@2|Bacteria,1MV61@1224|Proteobacteria,2VIBW@28216|Betaproteobacteria,1JZY0@119060|Burkholderiaceae	L	This protein is involved in the repair of mismatches in DNA. It is required for dam-dependent methyl-directed DNA mismatch repair. May act as a molecular matchmaker , a protein that promotes the formation of a stable complex between two or more DNA-binding proteins in an ATP-dependent manner without itself being part of a final effector complex	K03572	mutL; DNA mismatch repair protein MutL		DNA repair and recombination proteins	Protein families: genetic information processing	Brite Hierarchies	PF13589	Histidine kinase-, DNA gyrase B-, and HSP90-like ATPase
257sh-1	chromosome	chromosome:1	EXE55_RS13185	DNA mismatch repair endonuclease MutL	9	P:GO:0006281; P:GO:0006298; P:GO:0006974; P:GO:0090305; F:GO:0004519; F:GO:0005524; F:GO:0016887; F:GO:0030983; C:GO:0032300	P:DNA repair; P:mismatch repair; P:cellular response to DNA damage stimulus; P:nucleic acid phosphodiester bond hydrolysis; F:endonuclease activity; F:ATP binding; F:ATP hydrolysis activity; F:mismatched DNA binding; C:mismatch repair complex	COG0323@1|root,COG0323@2|Bacteria,1MV61@1224|Proteobacteria,2VIBW@28216|Betaproteobacteria,1JZY0@119060|Burkholderiaceae	L	This protein is involved in the repair of mismatches in DNA. It is required for dam-dependent methyl-directed DNA mismatch repair. May act as a molecular matchmaker , a protein that promotes the formation of a stable complex between two or more DNA-binding proteins in an ATP-dependent manner without itself being part of a final effector complex	K03572	mutL; DNA mismatch repair protein MutL		DNA repair and recombination proteins	Protein families: genetic information processing	Brite Hierarchies	PF01119	DNA mismatch repair protein, C-terminal domain
257sh-1	chromosome	chromosome:1	EXE55_RS13555	Holliday junction resolvase RuvX	9	P:GO:0000967; P:GO:0006139; P:GO:0006364; P:GO:0042254; P:GO:0090305; F:GO:0004518; F:GO:0016787; F:GO:0016788; C:GO:0005737	P:rRNA 5'-end processing; P:nucleobase-containing compound metabolic process; P:rRNA processing; P:ribosome biogenesis; P:nucleic acid phosphodiester bond hydrolysis; F:nuclease activity; F:hydrolase activity; F:hydrolase activity, acting on ester bonds; C:cytoplasm	COG0816@1|root,COG0816@2|Bacteria,1RDHZ@1224|Proteobacteria,2VUH0@28216|Betaproteobacteria,1K5WW@119060|Burkholderiaceae	J	Could be a nuclease involved in processing of the 5'-end of pre-16S rRNA	K07447	ruvX; putative pre-16S rRNA nuclease	[EC:3.1.-.-]	Ribosome biogenesis	Protein families: genetic information processing	Brite Hierarchies	PF03652	Holliday junction resolvase
257sh-1	chromosome	chromosome:1	EXE55_RS13980	replication-associated recombination protein A	4	P:GO:0006260; F:GO:0003677; F:GO:0005524; F:GO:0016887	P:DNA replication; F:DNA binding; F:ATP binding; F:ATP hydrolysis activity	COG2256@1|root,COG2256@2|Bacteria,1MUVS@1224|Proteobacteria,2VHN9@28216|Betaproteobacteria,1K1SM@119060|Burkholderiaceae	L	AAA ATPase central domain protein	K07478	ycaJ; putative ATPase		Replication and repair	Unclassified: genetic information processing	Not Included in Pathway or Brite	PF16193	AAA C-terminal domain
257sh-1	chromosome	chromosome:1	EXE55_RS13980	replication-associated recombination protein A	4	P:GO:0006260; F:GO:0003677; F:GO:0005524; F:GO:0016887	P:DNA replication; F:DNA binding; F:ATP binding; F:ATP hydrolysis activity	COG2256@1|root,COG2256@2|Bacteria,1MUVS@1224|Proteobacteria,2VHN9@28216|Betaproteobacteria,1K1SM@119060|Burkholderiaceae	L	AAA ATPase central domain protein	K07478	ycaJ; putative ATPase		Replication and repair	Unclassified: genetic information processing	Not Included in Pathway or Brite	PF00004	ATPase family associated with various cellular activities (AAA)
257sh-1	chromosome	chromosome:1	EXE55_RS13980	replication-associated recombination protein A	4	P:GO:0006260; F:GO:0003677; F:GO:0005524; F:GO:0016887	P:DNA replication; F:DNA binding; F:ATP binding; F:ATP hydrolysis activity	COG2256@1|root,COG2256@2|Bacteria,1MUVS@1224|Proteobacteria,2VHN9@28216|Betaproteobacteria,1K1SM@119060|Burkholderiaceae	L	AAA ATPase central domain protein	K07478	ycaJ; putative ATPase		Replication and repair	Unclassified: genetic information processing	Not Included in Pathway or Brite	PF12002	MgsA AAA+ ATPase C terminal
257sh-1	chromosome	chromosome:1	EXE55_RS14055	site-specific integrase	3	P:GO:0006310; P:GO:0015074; F:GO:0003677	P:DNA recombination; P:DNA integration; F:DNA binding	COG0582@1|root,COG0582@2|Bacteria,1QZ75@1224|Proteobacteria,2WHIK@28216|Betaproteobacteria,1K6MS@119060|Burkholderiaceae	L	Belongs to the 'phage' integrase family							PF00589	Phage integrase family
257sh-1	chromosome	chromosome:1	EXE55_RS14150	site-specific integrase	6	P:GO:0006310; P:GO:0015074; P:GO:0044826; P:GO:0046718; P:GO:0075713; F:GO:0003677	P:DNA recombination; P:DNA integration; P:viral genome integration into host DNA; P:viral entry into host cell; P:establishment of integrated proviral latency; F:DNA binding	COG0582@1|root,COG0582@2|Bacteria,1MU23@1224|Proteobacteria,2VJD3@28216|Betaproteobacteria,1JZZT@119060|Burkholderiaceae	L	Belongs to the 'phage' integrase family							PF00589	Phage integrase family
257sh-1	chromosome	chromosome:1	EXE55_RS14150	site-specific integrase	6	P:GO:0006310; P:GO:0015074; P:GO:0044826; P:GO:0046718; P:GO:0075713; F:GO:0003677	P:DNA recombination; P:DNA integration; P:viral genome integration into host DNA; P:viral entry into host cell; P:establishment of integrated proviral latency; F:DNA binding	COG0582@1|root,COG0582@2|Bacteria,1MU23@1224|Proteobacteria,2VJD3@28216|Betaproteobacteria,1JZZT@119060|Burkholderiaceae	L	Belongs to the 'phage' integrase family							PF13356	Arm DNA-binding domain
257sh-1	chromosome	chromosome:1	EXE55_RS14185	DNA-directed RNA polymerase subunit omega				COG1758@1|root,COG1758@2|Bacteria,1N6TX@1224|Proteobacteria,2VVUH@28216|Betaproteobacteria,1K9AE@119060|Burkholderiaceae	K	Promotes RNA polymerase assembly. Latches the N- and C- terminal regions of the beta' subunit thereby facilitating its interaction with the beta and alpha subunits	K03060	rpoZ; DNA-directed RNA polymerase subunit omega	[EC:2.7.7.6]	DNA repair and recombination proteins	Protein families: genetic information processing	Brite Hierarchies	PF01192	RNA polymerase Rpb6
257sh-1	chromosome	chromosome:1	EXE55_RS14225	3'-5' exoribonuclease	9	P:GO:0006260; P:GO:0071897; P:GO:0090305; F:GO:0003676; F:GO:0003677; F:GO:0003887; F:GO:0004527; F:GO:0016740; F:GO:0016779	P:DNA replication; P:DNA biosynthetic process; P:nucleic acid phosphodiester bond hydrolysis; F:nucleic acid binding; F:DNA binding; F:DNA-directed DNA polymerase activity; F:exonuclease activity; F:transferase activity; F:nucleotidyltransferase activity	COG0322@1|root,COG0847@1|root,COG0322@2|Bacteria,COG0847@2|Bacteria,1MV8Z@1224|Proteobacteria,2VK3W@28216|Betaproteobacteria,1K0AS@119060|Burkholderiaceae	L	DNA polymerase III, epsilon subunit	K02342	dnaQ; DNA polymerase III subunit epsilon	[EC:2.7.7.7]	Homologous recombination	Replication and repair	Genetic Information Processing	PF00929	Exonuclease
257sh-1	chromosome	chromosome:1	EXE55_RS14225	3'-5' exoribonuclease	9	P:GO:0006260; P:GO:0071897; P:GO:0090305; F:GO:0003676; F:GO:0003677; F:GO:0003887; F:GO:0004527; F:GO:0016740; F:GO:0016779	P:DNA replication; P:DNA biosynthetic process; P:nucleic acid phosphodiester bond hydrolysis; F:nucleic acid binding; F:DNA binding; F:DNA-directed DNA polymerase activity; F:exonuclease activity; F:transferase activity; F:nucleotidyltransferase activity	COG0322@1|root,COG0847@1|root,COG0322@2|Bacteria,COG0847@2|Bacteria,1MV8Z@1224|Proteobacteria,2VK3W@28216|Betaproteobacteria,1K0AS@119060|Burkholderiaceae	L	DNA polymerase III, epsilon subunit	K02342	dnaQ; DNA polymerase III subunit epsilon	[EC:2.7.7.7]	DNA repair and recombination proteins	Protein families: genetic information processing	Brite Hierarchies	PF00929	Exonuclease
257sh-1	chromosome	chromosome:1	EXE55_RS14415	DNA gyrase subunit A	12	P:GO:0006261; P:GO:0006265; P:GO:0051276; F:GO:0000166; F:GO:0003677; F:GO:0003916; F:GO:0003918; F:GO:0005524; F:GO:0016853; F:GO:0034335; C:GO:0005694; C:GO:0005737	P:DNA-dependent DNA replication; P:DNA topological change; P:chromosome organization; F:nucleotide binding; F:DNA binding; F:DNA topoisomerase activity; F:DNA topoisomerase type II (double strand cut, ATP-hydrolyzing) activity; F:ATP binding; F:isomerase activity; F:DNA negative supercoiling activity; C:chromosome; C:cytoplasm	COG0188@1|root,COG0188@2|Bacteria,1MUGG@1224|Proteobacteria,2VJ5Q@28216|Betaproteobacteria,1K0UC@119060|Burkholderiaceae	L	A type II topoisomerase that negatively supercoils closed circular double-stranded (ds) DNA in an ATP-dependent manner to modulate DNA topology and maintain chromosomes in an underwound state. Negative supercoiling favors strand separation, and DNA replication, transcription, recombination and repair, all of which involve strand separation. Also able to catalyze the interconversion of other topol…	K02469	gyrA; DNA gyrase subunit A	[EC:5.6.2.2]	DNA replication proteins	Protein families: genetic information processing	Brite Hierarchies	PF00521	DNA gyrase/topoisomerase IV, subunit A
257sh-1	chromosome	chromosome:1	EXE55_RS14415	DNA gyrase subunit A	12	P:GO:0006261; P:GO:0006265; P:GO:0051276; F:GO:0000166; F:GO:0003677; F:GO:0003916; F:GO:0003918; F:GO:0005524; F:GO:0016853; F:GO:0034335; C:GO:0005694; C:GO:0005737	P:DNA-dependent DNA replication; P:DNA topological change; P:chromosome organization; F:nucleotide binding; F:DNA binding; F:DNA topoisomerase activity; F:DNA topoisomerase type II (double strand cut, ATP-hydrolyzing) activity; F:ATP binding; F:isomerase activity; F:DNA negative supercoiling activity; C:chromosome; C:cytoplasm	COG0188@1|root,COG0188@2|Bacteria,1MUGG@1224|Proteobacteria,2VJ5Q@28216|Betaproteobacteria,1K0UC@119060|Burkholderiaceae	L	A type II topoisomerase that negatively supercoils closed circular double-stranded (ds) DNA in an ATP-dependent manner to modulate DNA topology and maintain chromosomes in an underwound state. Negative supercoiling favors strand separation, and DNA replication, transcription, recombination and repair, all of which involve strand separation. Also able to catalyze the interconversion of other topol…	K02469	gyrA; DNA gyrase subunit A	[EC:5.6.2.2]	DNA replication proteins	Protein families: genetic information processing	Brite Hierarchies	PF03989	DNA gyrase C-terminal domain, beta-propeller
257sh-1	chromosome	chromosome:1	EXE55_RS14415	DNA gyrase subunit A	12	P:GO:0006261; P:GO:0006265; P:GO:0051276; F:GO:0000166; F:GO:0003677; F:GO:0003916; F:GO:0003918; F:GO:0005524; F:GO:0016853; F:GO:0034335; C:GO:0005694; C:GO:0005737	P:DNA-dependent DNA replication; P:DNA topological change; P:chromosome organization; F:nucleotide binding; F:DNA binding; F:DNA topoisomerase activity; F:DNA topoisomerase type II (double strand cut, ATP-hydrolyzing) activity; F:ATP binding; F:isomerase activity; F:DNA negative supercoiling activity; C:chromosome; C:cytoplasm	COG0188@1|root,COG0188@2|Bacteria,1MUGG@1224|Proteobacteria,2VJ5Q@28216|Betaproteobacteria,1K0UC@119060|Burkholderiaceae	L	A type II topoisomerase that negatively supercoils closed circular double-stranded (ds) DNA in an ATP-dependent manner to modulate DNA topology and maintain chromosomes in an underwound state. Negative supercoiling favors strand separation, and DNA replication, transcription, recombination and repair, all of which involve strand separation. Also able to catalyze the interconversion of other topol…	K02469	gyrA; DNA gyrase subunit A	[EC:5.6.2.2]	DNA repair and recombination proteins	Protein families: genetic information processing	Brite Hierarchies	PF00521	DNA gyrase/topoisomerase IV, subunit A
257sh-1	chromosome	chromosome:1	EXE55_RS14415	DNA gyrase subunit A	12	P:GO:0006261; P:GO:0006265; P:GO:0051276; F:GO:0000166; F:GO:0003677; F:GO:0003916; F:GO:0003918; F:GO:0005524; F:GO:0016853; F:GO:0034335; C:GO:0005694; C:GO:0005737	P:DNA-dependent DNA replication; P:DNA topological change; P:chromosome organization; F:nucleotide binding; F:DNA binding; F:DNA topoisomerase activity; F:DNA topoisomerase type II (double strand cut, ATP-hydrolyzing) activity; F:ATP binding; F:isomerase activity; F:DNA negative supercoiling activity; C:chromosome; C:cytoplasm	COG0188@1|root,COG0188@2|Bacteria,1MUGG@1224|Proteobacteria,2VJ5Q@28216|Betaproteobacteria,1K0UC@119060|Burkholderiaceae	L	A type II topoisomerase that negatively supercoils closed circular double-stranded (ds) DNA in an ATP-dependent manner to modulate DNA topology and maintain chromosomes in an underwound state. Negative supercoiling favors strand separation, and DNA replication, transcription, recombination and repair, all of which involve strand separation. Also able to catalyze the interconversion of other topol…	K02469	gyrA; DNA gyrase subunit A	[EC:5.6.2.2]	DNA repair and recombination proteins	Protein families: genetic information processing	Brite Hierarchies	PF03989	DNA gyrase C-terminal domain, beta-propeller
257sh-1	chromosome	chromosome:1	EXE55_RS14455	integration host factor subunit beta	5	P:GO:0006310; P:GO:0006355; P:GO:0006417; F:GO:0003677; C:GO:0005694	P:DNA recombination; P:regulation of transcription, DNA-templated; P:regulation of translation; F:DNA binding; C:chromosome	COG0776@1|root,COG0776@2|Bacteria,1MZ7M@1224|Proteobacteria,2VSPN@28216|Betaproteobacteria,1K7M8@119060|Burkholderiaceae	K	This protein is one of the two subunits of integration host factor, a specific DNA-binding protein that functions in genetic recombination as well as in transcriptional and translational control	K05788	ihfB, himD; integration host factor subunit beta		DNA replication proteins	Protein families: genetic information processing	Brite Hierarchies	PF00216	Bacterial DNA-binding protein
257sh-1	chromosome	chromosome:1	EXE55_RS14455	integration host factor subunit beta	5	P:GO:0006310; P:GO:0006355; P:GO:0006417; F:GO:0003677; C:GO:0005694	P:DNA recombination; P:regulation of transcription, DNA-templated; P:regulation of translation; F:DNA binding; C:chromosome	COG0776@1|root,COG0776@2|Bacteria,1MZ7M@1224|Proteobacteria,2VSPN@28216|Betaproteobacteria,1K7M8@119060|Burkholderiaceae	K	This protein is one of the two subunits of integration host factor, a specific DNA-binding protein that functions in genetic recombination as well as in transcriptional and translational control	K05788	ihfB, himD; integration host factor subunit beta		Chromosome and associated proteins	Protein families: genetic information processing	Brite Hierarchies	PF00216	Bacterial DNA-binding protein
257sh-1	chromosome	chromosome:1	EXE55_RS14455	integration host factor subunit beta	5	P:GO:0006310; P:GO:0006355; P:GO:0006417; F:GO:0003677; C:GO:0005694	P:DNA recombination; P:regulation of transcription, DNA-templated; P:regulation of translation; F:DNA binding; C:chromosome	COG0776@1|root,COG0776@2|Bacteria,1MZ7M@1224|Proteobacteria,2VSPN@28216|Betaproteobacteria,1K7M8@119060|Burkholderiaceae	K	This protein is one of the two subunits of integration host factor, a specific DNA-binding protein that functions in genetic recombination as well as in transcriptional and translational control	K05788	ihfB, himD; integration host factor subunit beta		DNA repair and recombination proteins	Protein families: genetic information processing	Brite Hierarchies	PF00216	Bacterial DNA-binding protein
257sh-1	chromosome	chromosome:1	EXE55_RS14730	DNA recombination protein RmuC				COG1322@1|root,COG1322@2|Bacteria,1MWHV@1224|Proteobacteria,2VJVZ@28216|Betaproteobacteria,1JZSN@119060|Burkholderiaceae	S	DNA recombination protein, rmuC	K09760	rmuC; DNA recombination protein RmuC		Replication and repair	Unclassified: genetic information processing	Not Included in Pathway or Brite	PF02646	RmuC family
257sh-1	chromosome	chromosome:1	EXE55_RS14885	DNA repair protein RecO	3	P:GO:0006281; P:GO:0006310; P:GO:0006974	P:DNA repair; P:DNA recombination; P:cellular response to DNA damage stimulus	COG1381@1|root,COG1381@2|Bacteria,1RHIC@1224|Proteobacteria,2VJUC@28216|Betaproteobacteria,1K38E@119060|Burkholderiaceae	L	Involved in DNA repair and RecF pathway recombination	K03584	recO; DNA repair protein RecO (recombination protein O)		Homologous recombination	Replication and repair	Genetic Information Processing	PF11967	Recombination protein O N terminal
257sh-1	chromosome	chromosome:1	EXE55_RS14885	DNA repair protein RecO	3	P:GO:0006281; P:GO:0006310; P:GO:0006974	P:DNA repair; P:DNA recombination; P:cellular response to DNA damage stimulus	COG1381@1|root,COG1381@2|Bacteria,1RHIC@1224|Proteobacteria,2VJUC@28216|Betaproteobacteria,1K38E@119060|Burkholderiaceae	L	Involved in DNA repair and RecF pathway recombination	K03584	recO; DNA repair protein RecO (recombination protein O)		Homologous recombination	Replication and repair	Genetic Information Processing	PF02565	Recombination protein O C terminal
257sh-1	chromosome	chromosome:1	EXE55_RS14885	DNA repair protein RecO	3	P:GO:0006281; P:GO:0006310; P:GO:0006974	P:DNA repair; P:DNA recombination; P:cellular response to DNA damage stimulus	COG1381@1|root,COG1381@2|Bacteria,1RHIC@1224|Proteobacteria,2VJUC@28216|Betaproteobacteria,1K38E@119060|Burkholderiaceae	L	Involved in DNA repair and RecF pathway recombination	K03584	recO; DNA repair protein RecO (recombination protein O)		DNA repair and recombination proteins	Protein families: genetic information processing	Brite Hierarchies	PF11967	Recombination protein O N terminal
257sh-1	chromosome	chromosome:1	EXE55_RS14885	DNA repair protein RecO	3	P:GO:0006281; P:GO:0006310; P:GO:0006974	P:DNA repair; P:DNA recombination; P:cellular response to DNA damage stimulus	COG1381@1|root,COG1381@2|Bacteria,1RHIC@1224|Proteobacteria,2VJUC@28216|Betaproteobacteria,1K38E@119060|Burkholderiaceae	L	Involved in DNA repair and RecF pathway recombination	K03584	recO; DNA repair protein RecO (recombination protein O)		DNA repair and recombination proteins	Protein families: genetic information processing	Brite Hierarchies	PF02565	Recombination protein O C terminal
257sh-1	chromosome	chromosome:1	EXE55_RS14920	excinuclease ABC subunit UvrC	10	P:GO:0006281; P:GO:0006289; P:GO:0006974; P:GO:0009432; P:GO:0090305; F:GO:0003677; F:GO:0004518; F:GO:0009381; C:GO:0005737; C:GO:0009380	P:DNA repair; P:nucleotide-excision repair; P:cellular response to DNA damage stimulus; P:SOS response; P:nucleic acid phosphodiester bond hydrolysis; F:DNA binding; F:nuclease activity; F:excinuclease ABC activity; C:cytoplasm; C:excinuclease repair complex	COG0322@1|root,COG0322@2|Bacteria,1MV38@1224|Proteobacteria,2VIM4@28216|Betaproteobacteria,1K2QA@119060|Burkholderiaceae	L	The UvrABC repair system catalyzes the recognition and processing of DNA lesions. UvrC both incises the 5' and 3' sides of the lesion. The N-terminal half is responsible for the 3' incision and the C-terminal half is responsible for the 5' incision	K03703	uvrC; excinuclease ABC subunit C		DNA repair and recombination proteins	Protein families: genetic information processing	Brite Hierarchies	PF01541	GIY-YIG catalytic domain
257sh-1	chromosome	chromosome:1	EXE55_RS14920	excinuclease ABC subunit UvrC	10	P:GO:0006281; P:GO:0006289; P:GO:0006974; P:GO:0009432; P:GO:0090305; F:GO:0003677; F:GO:0004518; F:GO:0009381; C:GO:0005737; C:GO:0009380	P:DNA repair; P:nucleotide-excision repair; P:cellular response to DNA damage stimulus; P:SOS response; P:nucleic acid phosphodiester bond hydrolysis; F:DNA binding; F:nuclease activity; F:excinuclease ABC activity; C:cytoplasm; C:excinuclease repair complex	COG0322@1|root,COG0322@2|Bacteria,1MV38@1224|Proteobacteria,2VIM4@28216|Betaproteobacteria,1K2QA@119060|Burkholderiaceae	L	The UvrABC repair system catalyzes the recognition and processing of DNA lesions. UvrC both incises the 5' and 3' sides of the lesion. The N-terminal half is responsible for the 3' incision and the C-terminal half is responsible for the 5' incision	K03703	uvrC; excinuclease ABC subunit C		DNA repair and recombination proteins	Protein families: genetic information processing	Brite Hierarchies	PF02151	UvrB/uvrC motif
257sh-1	chromosome	chromosome:1	EXE55_RS14920	excinuclease ABC subunit UvrC	10	P:GO:0006281; P:GO:0006289; P:GO:0006974; P:GO:0009432; P:GO:0090305; F:GO:0003677; F:GO:0004518; F:GO:0009381; C:GO:0005737; C:GO:0009380	P:DNA repair; P:nucleotide-excision repair; P:cellular response to DNA damage stimulus; P:SOS response; P:nucleic acid phosphodiester bond hydrolysis; F:DNA binding; F:nuclease activity; F:excinuclease ABC activity; C:cytoplasm; C:excinuclease repair complex	COG0322@1|root,COG0322@2|Bacteria,1MV38@1224|Proteobacteria,2VIM4@28216|Betaproteobacteria,1K2QA@119060|Burkholderiaceae	L	The UvrABC repair system catalyzes the recognition and processing of DNA lesions. UvrC both incises the 5' and 3' sides of the lesion. The N-terminal half is responsible for the 3' incision and the C-terminal half is responsible for the 5' incision	K03703	uvrC; excinuclease ABC subunit C		DNA repair and recombination proteins	Protein families: genetic information processing	Brite Hierarchies	PF14520	Helix-hairpin-helix domain
257sh-1	chromosome	chromosome:1	EXE55_RS14920	excinuclease ABC subunit UvrC	10	P:GO:0006281; P:GO:0006289; P:GO:0006974; P:GO:0009432; P:GO:0090305; F:GO:0003677; F:GO:0004518; F:GO:0009381; C:GO:0005737; C:GO:0009380	P:DNA repair; P:nucleotide-excision repair; P:cellular response to DNA damage stimulus; P:SOS response; P:nucleic acid phosphodiester bond hydrolysis; F:DNA binding; F:nuclease activity; F:excinuclease ABC activity; C:cytoplasm; C:excinuclease repair complex	COG0322@1|root,COG0322@2|Bacteria,1MV38@1224|Proteobacteria,2VIM4@28216|Betaproteobacteria,1K2QA@119060|Burkholderiaceae	L	The UvrABC repair system catalyzes the recognition and processing of DNA lesions. UvrC both incises the 5' and 3' sides of the lesion. The N-terminal half is responsible for the 3' incision and the C-terminal half is responsible for the 5' incision	K03703	uvrC; excinuclease ABC subunit C		DNA repair and recombination proteins	Protein families: genetic information processing	Brite Hierarchies	PF08459	UvrC RIbonuclease H-like domain
257sh-1	chromosome	chromosome:1	EXE55_RS14945	IS21 family transposase	5	P:GO:0006310; P:GO:0015074; P:GO:0032196; F:GO:0003676; F:GO:0003677	P:DNA recombination; P:DNA integration; P:transposition; F:nucleic acid binding; F:DNA binding	COG4584@1|root,COG4584@2|Bacteria,1MWIV@1224|Proteobacteria,2VH6U@28216|Betaproteobacteria,1K5SV@119060|Burkholderiaceae	L	Integrase core domain							PF13384	Homeodomain-like domain
257sh-1	chromosome	chromosome:1	EXE55_RS14945	IS21 family transposase	5	P:GO:0006310; P:GO:0015074; P:GO:0032196; F:GO:0003676; F:GO:0003677	P:DNA recombination; P:DNA integration; P:transposition; F:nucleic acid binding; F:DNA binding	COG4584@1|root,COG4584@2|Bacteria,1MWIV@1224|Proteobacteria,2VH6U@28216|Betaproteobacteria,1K5SV@119060|Burkholderiaceae	L	Integrase core domain							PF00665	Integrase core domain
257sh-1	chromosome	chromosome:1	EXE55_RS15205	exodeoxyribonuclease V subunit gamma	15	P:GO:0000724; P:GO:0006281; P:GO:0006974; P:GO:0032508; P:GO:0090305; F:GO:0000166; F:GO:0003677; F:GO:0003678; F:GO:0004386; F:GO:0004518; F:GO:0004527; F:GO:0005524; F:GO:0008854; F:GO:0016787; C:GO:0009338	P:double-strand break repair via homologous recombination; P:DNA repair; P:cellular response to DNA damage stimulus; P:DNA duplex unwinding; P:nucleic acid phosphodiester bond hydrolysis; F:nucleotide binding; F:DNA binding; F:DNA helicase activity; F:helicase activity; F:nuclease activity; F:exonuclease activity; F:ATP binding; F:exodeoxyribonuclease V activity; F:hydrolase activity; C:exodeoxyr…	COG1330@1|root,COG1330@2|Bacteria,1MWTI@1224|Proteobacteria,2VHW7@28216|Betaproteobacteria,1K0A4@119060|Burkholderiaceae	L	A helicase nuclease that prepares dsDNA breaks (DSB) for recombinational DNA repair. Binds to DSBs and unwinds DNA via a highly rapid and processive ATP-dependent bidirectional helicase activity. Unwinds dsDNA until it encounters a Chi (crossover hotspot instigator) sequence from the 3' direction. Cuts ssDNA a few nucleotides 3' to the Chi site. The properties and activities of the enzyme are cha…	K03583	recC; exodeoxyribonuclease V gamma subunit	[EC:3.1.11.5]	Homologous recombination	Replication and repair	Genetic Information Processing	PF04257	Exodeoxyribonuclease V, gamma subunit
257sh-1	chromosome	chromosome:1	EXE55_RS15205	exodeoxyribonuclease V subunit gamma	15	P:GO:0000724; P:GO:0006281; P:GO:0006974; P:GO:0032508; P:GO:0090305; F:GO:0000166; F:GO:0003677; F:GO:0003678; F:GO:0004386; F:GO:0004518; F:GO:0004527; F:GO:0005524; F:GO:0008854; F:GO:0016787; C:GO:0009338	P:double-strand break repair via homologous recombination; P:DNA repair; P:cellular response to DNA damage stimulus; P:DNA duplex unwinding; P:nucleic acid phosphodiester bond hydrolysis; F:nucleotide binding; F:DNA binding; F:DNA helicase activity; F:helicase activity; F:nuclease activity; F:exonuclease activity; F:ATP binding; F:exodeoxyribonuclease V activity; F:hydrolase activity; C:exodeoxyr…	COG1330@1|root,COG1330@2|Bacteria,1MWTI@1224|Proteobacteria,2VHW7@28216|Betaproteobacteria,1K0A4@119060|Burkholderiaceae	L	A helicase nuclease that prepares dsDNA breaks (DSB) for recombinational DNA repair. Binds to DSBs and unwinds DNA via a highly rapid and processive ATP-dependent bidirectional helicase activity. Unwinds dsDNA until it encounters a Chi (crossover hotspot instigator) sequence from the 3' direction. Cuts ssDNA a few nucleotides 3' to the Chi site. The properties and activities of the enzyme are cha…	K03583	recC; exodeoxyribonuclease V gamma subunit	[EC:3.1.11.5]	Homologous recombination	Replication and repair	Genetic Information Processing	PF17946	RecC C-terminal domain
257sh-1	chromosome	chromosome:1	EXE55_RS15205	exodeoxyribonuclease V subunit gamma	15	P:GO:0000724; P:GO:0006281; P:GO:0006974; P:GO:0032508; P:GO:0090305; F:GO:0000166; F:GO:0003677; F:GO:0003678; F:GO:0004386; F:GO:0004518; F:GO:0004527; F:GO:0005524; F:GO:0008854; F:GO:0016787; C:GO:0009338	P:double-strand break repair via homologous recombination; P:DNA repair; P:cellular response to DNA damage stimulus; P:DNA duplex unwinding; P:nucleic acid phosphodiester bond hydrolysis; F:nucleotide binding; F:DNA binding; F:DNA helicase activity; F:helicase activity; F:nuclease activity; F:exonuclease activity; F:ATP binding; F:exodeoxyribonuclease V activity; F:hydrolase activity; C:exodeoxyr…	COG1330@1|root,COG1330@2|Bacteria,1MWTI@1224|Proteobacteria,2VHW7@28216|Betaproteobacteria,1K0A4@119060|Burkholderiaceae	L	A helicase nuclease that prepares dsDNA breaks (DSB) for recombinational DNA repair. Binds to DSBs and unwinds DNA via a highly rapid and processive ATP-dependent bidirectional helicase activity. Unwinds dsDNA until it encounters a Chi (crossover hotspot instigator) sequence from the 3' direction. Cuts ssDNA a few nucleotides 3' to the Chi site. The properties and activities of the enzyme are cha…	K03583	recC; exodeoxyribonuclease V gamma subunit	[EC:3.1.11.5]	DNA repair and recombination proteins	Protein families: genetic information processing	Brite Hierarchies	PF04257	Exodeoxyribonuclease V, gamma subunit
[truncated: 12,930 more rows]
