# Supplementary material for: Next Generation Sequencing and Comparative Genomic Analysis Reveal Extreme Plasticity of Two Burkholderia glumae Strains HN1 and HN2
Source: Pathogens. 2022 Oct 30;11(11):1265. doi: 10.3390/pathogens11111265 (PMC9698995; doi:10.3390/pathogens11111265)
Supplement: Supplementary file 1 [file pathogens-11-01265-s001.zip › Table S8 The annotation of genes located in recombined regions of ATCC 33617.xlsx]

## Sheet: rec_anno_last
Table S8 The annotation of genes located in recombined regions of ATCC 33617
Strain	Source	Source_info	Gene	Type	Start	End	length	Description	#GO	GO IDs	GO Names	eggNOG_OGs	COG_category	COG Description	KO id	KO description	EC	Pathway name	KEGG term2 name	KEGG term1 name	Pfam accession	Pfam description	CAZyme by HMMER	CAZyme by eCAMI	CAZyme by DIAMOND	CAZyme of Tools	VFID	VF_Name	VFcategory	PHI Protein ID	PHI Mutant Phenotype	Toxoflavin related gene
ATCC_33617	chromosome	chromosome:I	KS03_RS13320	CDS	168792	169416	625	hypothetical protein	2	C:GO:0016020; C:GO:0016021	C:membrane; C:integral component of membrane	2E16H@1|root,32WMB@2|Bacteria,1N6EU@1224|Proteobacteria,2WGBF@28216|Betaproteobacteria,1KICE@119060|Burkholderiaceae	-	-
ATCC_33617	chromosome	chromosome:I	KS03_RS13325	CDS	169418	169985	568	N-acetylmuramidase				COG3926@1|root,COG3926@2|Bacteria,1MVXW@1224|Proteobacteria,2VRGU@28216|Betaproteobacteria,1K5ME@119060|Burkholderiaceae	S	Predicted Peptidoglycan domain							PF09374	Predicted Peptidoglycan domain
ATCC_33617	chromosome	chromosome:I	KS03_RS13325	CDS	169418	169985	568	N-acetylmuramidase				COG3926@1|root,COG3926@2|Bacteria,1MVXW@1224|Proteobacteria,2VRGU@28216|Betaproteobacteria,1K5ME@119060|Burkholderiaceae	S	Predicted Peptidoglycan domain							PF05838	Glycosyl hydrolase 108
ATCC_33617	chromosome	chromosome:I	KS03_RS13330	CDS	169981	170431	451	hypothetical protein
ATCC_33617	chromosome	chromosome:I	KS03_RS13335	CDS	170503	171553	1051	phage late control protein				COG3500@1|root,COG3500@2|Bacteria,1MXT8@1224|Proteobacteria,2VN6E@28216|Betaproteobacteria,1K5RW@119060|Burkholderiaceae	S	Phage late control gene D protein (GPD)	K06905	K06905; uncharacterized protein		Function unknown	Poorly characterized	Not Included in Pathway or Brite	PF05954	Phage tail baseplate hub (GPD)
ATCC_33617	chromosome	chromosome:I	KS03_RS13340	CDS	171562	171769	208	tail protein X				COG5004@1|root,COG5004@2|Bacteria,1PY7P@1224|Proteobacteria,2WDG3@28216|Betaproteobacteria,1KA8E@119060|Burkholderiaceae	S	Phage Tail Protein X							PF05489	Phage Tail Protein X
ATCC_33617	chromosome	chromosome:I	KS03_RS13345	CDS	171743	172622	880	phage tail protein				COG3499@1|root,COG3499@2|Bacteria,1N88T@1224|Proteobacteria,2WGF6@28216|Betaproteobacteria,1KIDG@119060|Burkholderiaceae	S	Phage P2 GpU	K06906	K06906; uncharacterized protein		Function unknown	Poorly characterized	Not Included in Pathway or Brite	PF06995	Phage P2 GpU
ATCC_33617	chromosome	chromosome:I	KS03_RS13350	CDS	172631	175061	2431	phage tail tape measure protein				COG5283@1|root,COG5283@2|Bacteria,1R3QP@1224|Proteobacteria,2VNXF@28216|Betaproteobacteria,1K5IF@119060|Burkholderiaceae	S	Phage-related minor tail protein							PF10145	Phage-related minor tail protein
ATCC_33617	chromosome	chromosome:I	KS03_RS13355	CDS	175142	175445	304	phage tail assembly protein				2EFU7@1|root,339KB@2|Bacteria,1NH5H@1224|Proteobacteria,2WDJI@28216|Betaproteobacteria,1KAFR@119060|Burkholderiaceae	S	Phage tail assembly chaperone proteins, E, or 41 or 14							PF10109	Phage tail assembly chaperone proteins, E, or 41 or 14
ATCC_33617	chromosome	chromosome:I	KS03_RS13360	CDS	175526	176030	505	phage major tail tube protein				COG3498@1|root,COG3498@2|Bacteria,1Q8HB@1224|Proteobacteria,2WFNQ@28216|Betaproteobacteria,1K7JZ@119060|Burkholderiaceae	S	Phage tail tube protein FII	K06908	K06908; uncharacterized protein		Function unknown	Poorly characterized	Not Included in Pathway or Brite	PF04985	Phage tail tube protein FII
ATCC_33617	chromosome	chromosome:I	KS03_RS13365	CDS	176039	177209	1171	phage tail sheath family protein				COG3497@1|root,COG3497@2|Bacteria,1MW1V@1224|Proteobacteria,2VHUW@28216|Betaproteobacteria,1K60A@119060|Burkholderiaceae	S	Phage tail sheath C-terminal domain	K06907	K06907; uncharacterized protein		Function unknown	Poorly characterized	Not Included in Pathway or Brite	PF04984	Phage tail sheath protein subtilisin-like domain
ATCC_33617	chromosome	chromosome:I	KS03_RS13365	CDS	176039	177209	1171	phage tail sheath family protein				COG3497@1|root,COG3497@2|Bacteria,1MW1V@1224|Proteobacteria,2VHUW@28216|Betaproteobacteria,1K60A@119060|Burkholderiaceae	S	Phage tail sheath C-terminal domain	K06907	K06907; uncharacterized protein		Function unknown	Poorly characterized	Not Included in Pathway or Brite	PF17482	Phage tail sheath C-terminal domain
ATCC_33617	chromosome	chromosome:I	KS03_RS13370	CDS	177280	178003	724	tail assembly chaperone				2DNRH@1|root,32YSK@2|Bacteria,1NAAH@1224|Proteobacteria,2VWSE@28216|Betaproteobacteria,1K7YA@119060|Burkholderiaceae	S	Caudovirales tail fibre assembly protein, lambda gpK							PF02413	Caudovirales tail fibre assembly protein, lambda gpK
ATCC_33617	chromosome	chromosome:I	KS03_RS13375	CDS	178016	180029	2014	phage tail protein				COG4675@1|root,COG4675@2|Bacteria,1PFCG@1224|Proteobacteria,2WCN7@28216|Betaproteobacteria,1K6MI@119060|Burkholderiaceae	S	tail collar domain protein							PF07484	Phage Tail Collar Domain
ATCC_33617	chromosome	chromosome:I	KS03_RS13380	CDS	180016	180595	580	phage tail protein I				COG4385@1|root,COG4385@2|Bacteria,1N26V@1224|Proteobacteria,2VWFB@28216|Betaproteobacteria,1K4X5@119060|Burkholderiaceae	S	Phage tail protein (Tail_P2_I)							PF09684	Phage tail protein (Tail_P2_I)
ATCC_33617	chromosome	chromosome:I	KS03_RS13385	CDS	180584	181481	898	baseplate J/gp47 family protein				COG3948@1|root,COG3948@2|Bacteria,1MUFF@1224|Proteobacteria,2VQAF@28216|Betaproteobacteria,1K4VN@119060|Burkholderiaceae	S	Baseplate J-like protein							PF04865	Baseplate J-like protein
ATCC_33617	chromosome	chromosome:I	KS03_RS13390	CDS	181477	181810	334	GPW/gp25 family protein				COG3628@1|root,COG3628@2|Bacteria,1N7WS@1224|Proteobacteria,2WD04@28216|Betaproteobacteria,1K8WH@119060|Burkholderiaceae	S	Gene 25-like lysozyme	K06903	K06903; uncharacterized protein		Function unknown	Poorly characterized	Not Included in Pathway or Brite	PF04965	Baseplate wedge protein gp25
ATCC_33617	chromosome	chromosome:I	KS03_RS13395	CDS	181806	182004	199	hypothetical protein				2BTJK@1|root,32NS6@2|Bacteria,1QATM@1224|Proteobacteria,2WDMD@28216|Betaproteobacteria,1KAK8@119060|Burkholderiaceae	-	-
ATCC_33617	chromosome	chromosome:I	KS03_RS31375	CDS	182071	182809	739	hypothetical protein				2A8G1@1|root,30XI0@2|Bacteria,1PJDQ@1224|Proteobacteria,2W7XP@28216|Betaproteobacteria,1KFBJ@119060|Burkholderiaceae	-	-
ATCC_33617	chromosome	chromosome:I	KS03_RS13400	CDS	182914	183595	682	phage baseplate assembly protein V				COG4540@1|root,COG4540@2|Bacteria,1N2WK@1224|Proteobacteria,2WAUX@28216|Betaproteobacteria,1K596@119060|Burkholderiaceae	S	Type VI secretion system, phage-baseplate injector							PF04717	Type VI secretion system/phage-baseplate injector OB domain
ATCC_33617	chromosome	chromosome:I	KS03_RS13405	CDS	183591	184122	532	hypothetical protein				2DNH4@1|root,32XGS@2|Bacteria,1N1FJ@1224|Proteobacteria,2W6XU@28216|Betaproteobacteria,1K6ZP@119060|Burkholderiaceae	-	-
ATCC_33617	chromosome	chromosome:I	KS03_RS13410	CDS	184111	184642	532	phage tail protein				2DR7R@1|root,33AKC@2|Bacteria,1NKRG@1224|Proteobacteria,2WBCX@28216|Betaproteobacteria,1K5RE@119060|Burkholderiaceae	-	-							PF06763	Prophage minor tail protein Z (GPZ)
ATCC_33617	chromosome	chromosome:I	KS03_RS13415	CDS	184645	184936	292	hypothetical protein				28TRA@1|root,2ZFYH@2|Bacteria,1PBM7@1224|Proteobacteria,2WD62@28216|Betaproteobacteria,1K9H3@119060|Burkholderiaceae	-	-
ATCC_33617	chromosome	chromosome:I	KS03_RS13420	pseudo	184937	185933	997
ATCC_33617	chromosome	chromosome:I	KS03_RS13425	CDS	186009	186354	346	head decoration protein				2E3ZR@1|root,32YWN@2|Bacteria,1PSSS@1224|Proteobacteria,2WCYC@28216|Betaproteobacteria,1K8RP@119060|Burkholderiaceae	S	Bacteriophage lambda head decoration protein D							PF02924	Bacteriophage lambda head decoration protein D
ATCC_33617	chromosome	chromosome:I	KS03_RS13430	CDS	186383	187484	1102	Clp protease ClpP	5	P:GO:0006508; F:GO:0004176; F:GO:0004252; F:GO:0008233; C:GO:0005737	P:proteolysis; F:ATP-dependent peptidase activity; F:serine-type endopeptidase activity; F:peptidase activity; C:cytoplasm	COG0740@1|root,COG0740@2|Bacteria,1MUQ9@1224|Proteobacteria,2VRCJ@28216|Betaproteobacteria,1K6KF@119060|Burkholderiaceae	OU	Clp protease							PF00574	Clp protease
ATCC_33617	chromosome	chromosome:I	KS03_RS13435	CDS	187480	188971	1492	phage portal protein	2	P:GO:0019068; F:GO:0005198	P:virion assembly; F:structural molecule activity	COG5511@1|root,COG5511@2|Bacteria,1MVN4@1224|Proteobacteria,2VKKT@28216|Betaproteobacteria,1K1WU@119060|Burkholderiaceae	S	Phage portal protein, lambda family							PF05136	Phage portal protein, lambda family
ATCC_33617	chromosome	chromosome:I	KS03_RS13440	CDS	188967	189174	208	hypothetical protein				2DRYU@1|root,33DR8@2|Bacteria,1NN6W@1224|Proteobacteria,2WDMH@28216|Betaproteobacteria,1KAKK@119060|Burkholderiaceae	-	-
ATCC_33617	chromosome	chromosome:I	KS03_RS13445	CDS	189184	191203	2020	phage terminase large subunit family protein	4	P:GO:0090305; F:GO:0004519; F:GO:0005524; F:GO:0016887	P:nucleic acid phosphodiester bond hydrolysis; F:endonuclease activity; F:ATP binding; F:ATP hydrolysis activity	COG5525@1|root,COG5525@2|Bacteria,1MVS3@1224|Proteobacteria,2VIPB@28216|Betaproteobacteria,1K5WQ@119060|Burkholderiaceae	S	terminase GpA							PF05876	Phage terminase large subunit (GpA)
ATCC_33617	chromosome	chromosome:I	KS03_RS29970	CDS	191165	191735	571	hypothetical protein				COG4220@1|root,COG4220@2|Bacteria,1PUJ8@1224|Proteobacteria,2WCEH@28216|Betaproteobacteria,1K7NE@119060|Burkholderiaceae	L	transposase activity
ATCC_33617	chromosome	chromosome:I	KS03_RS29975	CDS	192289	193063	775	zinc finger-like domain-containing protein	3	F:GO:0031072; F:GO:0046872; F:GO:0051082	F:heat shock protein binding; F:metal ion binding; F:unfolded protein binding	2FEY1@1|root,346WS@2|Bacteria,1P2A2@1224|Proteobacteria,2W406@28216|Betaproteobacteria,1K4S8@119060|Burkholderiaceae	-	-
ATCC_33617	chromosome	chromosome:I	KS03_RS13460	CDS	193281	195783	2503	virulence protein E				COG4643@1|root,COG5545@1|root,COG4643@2|Bacteria,COG5545@2|Bacteria,1MVGK@1224|Proteobacteria,2VP8K@28216|Betaproteobacteria,1K4BJ@119060|Burkholderiaceae	D	Virulence-associated protein E	K06919	K06919; putative DNA primase/helicase		Replication and repair	Unclassified: genetic information processing	Not Included in Pathway or Brite	PF05272	Virulence-associated protein E
ATCC_33617	chromosome	chromosome:I	KS03_RS13465	CDS	195941	196325	385	hypothetical protein				2AGIY@1|root,316RV@2|Bacteria,1PXY3@1224|Proteobacteria,2WD8T@28216|Betaproteobacteria,1K9QH@119060|Burkholderiaceae	-	-
ATCC_33617	chromosome	chromosome:I	KS03_RS13470	CDS	196311	196854	544	hypothetical protein				2CDVB@1|root,30YFR@2|Bacteria,1PKAW@1224|Proteobacteria,2W8KG@28216|Betaproteobacteria,1K4H5@119060|Burkholderiaceae	-	-
ATCC_33617	chromosome	chromosome:I	KS03_RS13480	CDS	197279	197783	505	helix-turn-helix domain-containing protein	1	F:GO:0003677	F:DNA binding	COG1396@1|root,COG1396@2|Bacteria,1PYXJ@1224|Proteobacteria,2WE1W@28216|Betaproteobacteria,1KBFG@119060|Burkholderiaceae	K	Cro/C1-type HTH DNA-binding domain							PF01381	Helix-turn-helix
ATCC_33617	chromosome	chromosome:I	KS03_RS29985	CDS	197736	198252	517	hypothetical protein	2	C:GO:0016020; C:GO:0016021	C:membrane; C:integral component of membrane
ATCC_33617	chromosome	chromosome:I	KS03_RS29990	CDS	198356	198575	220	hypothetical protein
ATCC_33617	chromosome	chromosome:I	KS03_RS13485	CDS	198609	198987	379	hypothetical protein				2AGJN@1|root,316SQ@2|Bacteria,1PXYY@1224|Proteobacteria,2WD9H@28216|Betaproteobacteria,1K9SJ@119060|Burkholderiaceae	-	-
ATCC_33617	chromosome	chromosome:I	KS03_RS13490	CDS	198986	200363	1378	hypothetical protein				COG1475@1|root,COG1475@2|Bacteria,1NUWQ@1224|Proteobacteria,2WBJK@28216|Betaproteobacteria,1K65T@119060|Burkholderiaceae	K	DNA binding
ATCC_33617	chromosome	chromosome:I	KS03_RS13495	CDS	200359	200824	466	hypothetical protein				2B2BA@1|root,31UVE@2|Bacteria,1QACZ@1224|Proteobacteria,2WDAN@28216|Betaproteobacteria,1K9V9@119060|Burkholderiaceae	-	-
ATCC_33617	chromosome	chromosome:I	KS03_RS13500	CDS	200816	201308	493	hypothetical protein
ATCC_33617	chromosome	chromosome:I	KS03_RS13505	CDS	201352	201535	184	hypothetical protein				2AGHV@1|root,316QF@2|Bacteria,1PXW9@1224|Proteobacteria,2WD76@28216|Betaproteobacteria,1K9JY@119060|Burkholderiaceae	-	-
ATCC_33617	chromosome	chromosome:I	KS03_RS32055	CDS	201707	201884	178	hypothetical protein
ATCC_33617	chromosome	chromosome:I	KS03_RS29995	CDS	202108	202969	862	conjugal transfer protein TraN				COG0503@1|root,COG0503@2|Bacteria,1N3DT@1224|Proteobacteria,2VVKG@28216|Betaproteobacteria,1KBT3@119060|Burkholderiaceae	F	Catalyzes a salvage reaction resulting in the formation of AMP, that is energically less costly than de novo synthesis
ATCC_33617	chromosome	chromosome:I	KS03_RS13510	CDS	202978	204079	1102	site-specific integrase	3	P:GO:0006310; P:GO:0015074; F:GO:0003677	P:DNA recombination; P:DNA integration; F:DNA binding	COG0582@1|root,COG0582@2|Bacteria,1NWGS@1224|Proteobacteria,2VKWM@28216|Betaproteobacteria,1K1JF@119060|Burkholderiaceae	L	Phage integrase family							PF00589	Phage integrase family
ATCC_33617	chromosome	chromosome:I	KS03_RS13535	pseudo	206982	208026	1045
ATCC_33617	chromosome	chromosome:I	KS03_RS13540	CDS	208621	210232	1612	hypothetical protein				COG0110@1|root,COG0110@2|Bacteria,1NBS1@1224|Proteobacteria,2VWMJ@28216|Betaproteobacteria	J	maltose O-acetyltransferase activity
ATCC_33617	chromosome	chromosome:I	KS03_RS13990	tRNA	307032	307117	86	tRNA-Leu
ATCC_33617	chromosome	chromosome:I	KS03_RS13995	CDS	307289	308504	1216	integrase arm-type DNA-binding domain-containing protein	3	P:GO:0006310; P:GO:0015074; F:GO:0003677	P:DNA recombination; P:DNA integration; F:DNA binding	COG0582@1|root,COG0582@2|Bacteria,1MU23@1224|Proteobacteria,2VHG5@28216|Betaproteobacteria,1KFH3@119060|Burkholderiaceae	L	Belongs to the 'phage' integrase family							PF13356	Arm DNA-binding domain
ATCC_33617	chromosome	chromosome:I	KS03_RS13995	CDS	307289	308504	1216	integrase arm-type DNA-binding domain-containing protein	3	P:GO:0006310; P:GO:0015074; F:GO:0003677	P:DNA recombination; P:DNA integration; F:DNA binding	COG0582@1|root,COG0582@2|Bacteria,1MU23@1224|Proteobacteria,2VHG5@28216|Betaproteobacteria,1KFH3@119060|Burkholderiaceae	L	Belongs to the 'phage' integrase family							PF00589	Phage integrase family
ATCC_33617	chromosome	chromosome:I	KS03_RS14000	CDS	309119	311981	2863	DUF927 domain-containing protein	1	F:GO:0016817	F:hydrolase activity, acting on acid anhydrides	COG4643@1|root,COG5519@1|root,COG4643@2|Bacteria,COG5519@2|Bacteria,1MW5H@1224|Proteobacteria,2VHZ7@28216|Betaproteobacteria,1KGXR@119060|Burkholderiaceae	L	Domain of unknown function (DUF927)	K06919	K06919; putative DNA primase/helicase		Replication and repair	Unclassified: genetic information processing	Not Included in Pathway or Brite	PF08707	Primase C terminal 2 (PriCT-2)
ATCC_33617	chromosome	chromosome:I	KS03_RS14000	CDS	309119	311981	2863	DUF927 domain-containing protein	1	F:GO:0016817	F:hydrolase activity, acting on acid anhydrides	COG4643@1|root,COG5519@1|root,COG4643@2|Bacteria,COG5519@2|Bacteria,1MW5H@1224|Proteobacteria,2VHZ7@28216|Betaproteobacteria,1KGXR@119060|Burkholderiaceae	L	Domain of unknown function (DUF927)	K06919	K06919; putative DNA primase/helicase		Replication and repair	Unclassified: genetic information processing	Not Included in Pathway or Brite	PF13362	Toprim domain
ATCC_33617	chromosome	chromosome:I	KS03_RS14000	CDS	309119	311981	2863	DUF927 domain-containing protein	1	F:GO:0016817	F:hydrolase activity, acting on acid anhydrides	COG4643@1|root,COG5519@1|root,COG4643@2|Bacteria,COG5519@2|Bacteria,1MW5H@1224|Proteobacteria,2VHZ7@28216|Betaproteobacteria,1KGXR@119060|Burkholderiaceae	L	Domain of unknown function (DUF927)	K06919	K06919; putative DNA primase/helicase		Replication and repair	Unclassified: genetic information processing	Not Included in Pathway or Brite	PF06048	Domain of unknown function (DUF927)
ATCC_33617	chromosome	chromosome:I	KS03_RS14005	CDS	312108	312435	328	hypothetical protein				29K66@1|root,3073K@2|Bacteria,1PX0P@1224|Proteobacteria,2WCIF@28216|Betaproteobacteria,1K7XS@119060|Burkholderiaceae	-	-
ATCC_33617	chromosome	chromosome:I	KS03_RS14010	CDS	312444	312792	349	hypothetical protein				29FCG@1|root,302A5@2|Bacteria,1PIX6@1224|Proteobacteria,2W7GK@28216|Betaproteobacteria,1K7QR@119060|Burkholderiaceae	-	-
ATCC_33617	chromosome	chromosome:I	KS03_RS14015	CDS	312784	312997	214	hypothetical protein				2AGI5@1|root,316QS@2|Bacteria,1PXWR@1224|Proteobacteria,2WD7J@28216|Betaproteobacteria,1K9M3@119060|Burkholderiaceae	-	-
ATCC_33617	chromosome	chromosome:I	KS03_RS14020	CDS	312989	313292	304	hypothetical protein				2AGBZ@1|root,316HM@2|Bacteria,1PXM3@1224|Proteobacteria,2WD0E@28216|Betaproteobacteria,1K8XB@119060|Burkholderiaceae	-	-
ATCC_33617	chromosome	chromosome:I	KS03_RS32285	CDS	313284	313461	178	hypothetical protein				2ANSC@1|root,31DSB@2|Bacteria,1QB3F@1224|Proteobacteria,2WDR9@28216|Betaproteobacteria,1KAUK@119060|Burkholderiaceae	-	-
ATCC_33617	chromosome	chromosome:I	KS03_RS14025	CDS	313791	314316	526	hypothetical protein				2APNK@1|root,31ES5@2|Bacteria,1PWE0@1224|Proteobacteria,2WBYR@28216|Betaproteobacteria,1K6XG@119060|Burkholderiaceae	-	-
ATCC_33617	chromosome	chromosome:I	KS03_RS30035	CDS	314312	314588	277	AlpA family phage regulatory protein				COG3311@1|root,COG3311@2|Bacteria	K	DNA excision							PF05930	Prophage CP4-57 regulatory protein (AlpA)
ATCC_33617	chromosome	chromosome:I	KS03_RS14030	CDS	315145	316969	1825	ATP-binding protein	2	P:GO:0090305; F:GO:0004519	P:nucleic acid phosphodiester bond hydrolysis; F:endonuclease activity	COG3950@1|root,COG3950@2|Bacteria,1MUE9@1224|Proteobacteria,2WF1C@28216|Betaproteobacteria	L	Protein of unknown function (DUF2813)	K07459	ybjD; putative ATP-dependent endonuclease of the OLD family		Replication and repair	Unclassified: genetic information processing	Not Included in Pathway or Brite	PF13175	AAA ATPase domain
ATCC_33617	chromosome	chromosome:I	KS03_RS14035	CDS	317450	319433	1984	tetratricopeptide repeat protein	3	P:GO:0006493; F:GO:0016740; F:GO:0016757	P:protein O-linked glycosylation; F:transferase activity; F:glycosyltransferase activity	COG0457@1|root,COG0457@2|Bacteria,1R7SF@1224|Proteobacteria,2W1VN@28216|Betaproteobacteria	S	Domain of unknown function (DUF4365)							PF13414	TPR repeat
ATCC_33617	chromosome	chromosome:I	KS03_RS14035	CDS	317450	319433	1984	tetratricopeptide repeat protein	3	P:GO:0006493; F:GO:0016740; F:GO:0016757	P:protein O-linked glycosylation; F:transferase activity; F:glycosyltransferase activity	COG0457@1|root,COG0457@2|Bacteria,1R7SF@1224|Proteobacteria,2W1VN@28216|Betaproteobacteria	S	Domain of unknown function (DUF4365)							PF14280	Domain of unknown function (DUF4365)
ATCC_33617	chromosome	chromosome:I	KS03_RS14035	CDS	317450	319433	1984	tetratricopeptide repeat protein	3	P:GO:0006493; F:GO:0016740; F:GO:0016757	P:protein O-linked glycosylation; F:transferase activity; F:glycosyltransferase activity	COG0457@1|root,COG0457@2|Bacteria,1R7SF@1224|Proteobacteria,2W1VN@28216|Betaproteobacteria	S	Domain of unknown function (DUF4365)							PF13432	Tetratricopeptide repeat
ATCC_33617	chromosome	chromosome:I	KS03_RS14035	CDS	317450	319433	1984	tetratricopeptide repeat protein	3	P:GO:0006493; F:GO:0016740; F:GO:0016757	P:protein O-linked glycosylation; F:transferase activity; F:glycosyltransferase activity	COG0457@1|root,COG0457@2|Bacteria,1R7SF@1224|Proteobacteria,2W1VN@28216|Betaproteobacteria	S	Domain of unknown function (DUF4365)							PF13181	Tetratricopeptide repeat
ATCC_33617	chromosome	chromosome:I	KS03_RS14040	CDS	319611	320187	577	recombinase family protein	4	P:GO:0006310; P:GO:0015074; F:GO:0000150; F:GO:0003677	P:DNA recombination; P:DNA integration; F:DNA strand exchange activity; F:DNA binding	COG1961@1|root,COG1961@2|Bacteria,1RA0V@1224|Proteobacteria,2VQAK@28216|Betaproteobacteria,1K7PC@119060|Burkholderiaceae	L	Resolvase helix-turn-helix domain protein	K14060	pinR; putative DNA-invertase from lambdoid prophage Rac		Replication and repair	Unclassified: genetic information processing	Not Included in Pathway or Brite	PF02796	Helix-turn-helix domain of resolvase
ATCC_33617	chromosome	chromosome:I	KS03_RS14040	CDS	319611	320187	577	recombinase family protein	4	P:GO:0006310; P:GO:0015074; F:GO:0000150; F:GO:0003677	P:DNA recombination; P:DNA integration; F:DNA strand exchange activity; F:DNA binding	COG1961@1|root,COG1961@2|Bacteria,1RA0V@1224|Proteobacteria,2VQAK@28216|Betaproteobacteria,1K7PC@119060|Burkholderiaceae	L	Resolvase helix-turn-helix domain protein	K14060	pinR; putative DNA-invertase from lambdoid prophage Rac		Replication and repair	Unclassified: genetic information processing	Not Included in Pathway or Brite	PF00239	Resolvase, N terminal domain
ATCC_33617	chromosome	chromosome:I	KS03_RS30040	CDS	320274	321092	819	IS5 family transposase	3	P:GO:0006313; F:GO:0003677; F:GO:0004803	P:transposition, DNA-mediated; F:DNA binding; F:transposase activity	COG3293@1|root,COG3293@2|Bacteria,1REUV@1224|Proteobacteria,2VREC@28216|Betaproteobacteria,1K6P0@119060|Burkholderiaceae	L	transposase							PF13340	Putative transposase of IS4/5 family (DUF4096)
ATCC_33617	chromosome	chromosome:I	KS03_RS30040	CDS	320274	321092	819	IS5 family transposase	3	P:GO:0006313; F:GO:0003677; F:GO:0004803	P:transposition, DNA-mediated; F:DNA binding; F:transposase activity	COG3293@1|root,COG3293@2|Bacteria,1REUV@1224|Proteobacteria,2VREC@28216|Betaproteobacteria,1K6P0@119060|Burkholderiaceae	L	transposase							PF01609	Transposase DDE domain
ATCC_33617	chromosome	chromosome:I	KS03_RS30045	CDS	321527	322001	475	GNAT family N-acetyltransferase	2	F:GO:0008080; F:GO:0016740	F:N-acetyltransferase activity; F:transferase activity	COG0454@1|root,COG0456@2|Bacteria,1RI07@1224|Proteobacteria,2WG41@28216|Betaproteobacteria,1K7BU@119060|Burkholderiaceae	K	Acetyltransferase (GNAT) domain							PF13673	Acetyltransferase (GNAT) domain
ATCC_33617	chromosome	chromosome:I	KS03_RS16960	CDS	981509	982643	1135	site-specific integrase	3	P:GO:0006310; P:GO:0015074; F:GO:0003677	P:DNA recombination; P:DNA integration; F:DNA binding	COG0582@1|root,COG0582@2|Bacteria,1MVZB@1224|Proteobacteria,1RP4Y@1236|Gammaproteobacteria	L	Belongs to the 'phage' integrase family	K14059	int; integrase		Replication and repair	Unclassified: genetic information processing	Not Included in Pathway or Brite	PF00589	Phage integrase family
ATCC_33617	chromosome	chromosome:I	KS03_RS16960	CDS	981509	982643	1135	site-specific integrase	3	P:GO:0006310; P:GO:0015074; F:GO:0003677	P:DNA recombination; P:DNA integration; F:DNA binding	COG0582@1|root,COG0582@2|Bacteria,1MVZB@1224|Proteobacteria,1RP4Y@1236|Gammaproteobacteria	L	Belongs to the 'phage' integrase family	K14059	int; integrase		Replication and repair	Unclassified: genetic information processing	Not Included in Pathway or Brite	PF14659	Phage integrase, N-terminal SAM-like domain
ATCC_33617	chromosome	chromosome:I	KS03_RS32865	pseudo	982768	982921	154
ATCC_33617	chromosome	chromosome:I	KS03_RS16970	CDS	983070	983601	532	hypothetical protein	2	C:GO:0016020; C:GO:0016021	C:membrane; C:integral component of membrane	2A8FY@1|root,30XHW@2|Bacteria,1PJDI@1224|Proteobacteria,2W7XF@28216|Betaproteobacteria,1KFBA@119060|Burkholderiaceae	-	-
ATCC_33617	chromosome	chromosome:I	KS03_RS30090	CDS	984021	985152	1132	XRE family transcriptional regulator				COG2856@1|root,COG2856@2|Bacteria,1NEHF@1224|Proteobacteria,2VNNV@28216|Betaproteobacteria,1K5K6@119060|Burkholderiaceae	K	Evidence 3 Function proposed based on presence of conserved amino acid motif, structural feature or limited homology							PF01381	Helix-turn-helix
ATCC_33617	chromosome	chromosome:I	KS03_RS30090	CDS	984021	985152	1132	XRE family transcriptional regulator				COG2856@1|root,COG2856@2|Bacteria,1NEHF@1224|Proteobacteria,2VNNV@28216|Betaproteobacteria,1K5K6@119060|Burkholderiaceae	K	Evidence 3 Function proposed based on presence of conserved amino acid motif, structural feature or limited homology							PF06114	IrrE N-terminal-like domain
ATCC_33617	chromosome	chromosome:I	KS03_RS30095	CDS	985148	985745	598	hypothetical protein				2EH79@1|root,33AZ3@2|Bacteria,1NNEV@1224|Proteobacteria	-	-
ATCC_33617	chromosome	chromosome:I	KS03_RS16980	CDS	985868	986624	757	oxidoreductase				COG4540@1|root,COG4540@2|Bacteria,1RKWX@1224|Proteobacteria,2VUS6@28216|Betaproteobacteria	S	Baseplate assembly protein							PF18946	GpV Apex motif
ATCC_33617	chromosome	chromosome:I	KS03_RS16985	CDS	986613	987480	868	hypothetical protein				28VF4@1|root,2ZHHP@2|Bacteria,1RCEY@1224|Proteobacteria,2W0RC@28216|Betaproteobacteria,1KARA@119060|Burkholderiaceae	-	-
ATCC_33617	chromosome	chromosome:I	KS03_RS32320	CDS	987476	987629	154	hypothetical protein
ATCC_33617	chromosome	chromosome:I	KS03_RS28975	CDS	987625	988360	736	hypothetical protein				2E9A4@1|root,333I4@2|Bacteria,1RF97@1224|Proteobacteria,2W8T7@28216|Betaproteobacteria,1KBC6@119060|Burkholderiaceae	-	-
ATCC_33617	chromosome	chromosome:I	KS03_RS28980	CDS	988362	990189	1828	phage tail tip lysozyme	3	F:GO:0004040; C:GO:0016020; C:GO:0016021	F:amidase activity; C:membrane; C:integral component of membrane	COG0741@1|root,COG5283@1|root,COG0741@2|Bacteria,COG5283@2|Bacteria,1N3QW@1224|Proteobacteria,2W2AX@28216|Betaproteobacteria	M	lytic transglycosylase activity							PF18013	Phage tail lysozyme
ATCC_33617	chromosome	chromosome:I	KS03_RS17000	CDS	990191	990344	154	hypothetical protein	2	P:GO:0006414; F:GO:0003746	P:translational elongation; F:translation elongation factor activity	2A00V@1|root,30N2Z@2|Bacteria,1PJ6B@1224|Proteobacteria,2W7RA@28216|Betaproteobacteria,1KF0C@119060|Burkholderiaceae	-	-
ATCC_33617	chromosome	chromosome:I	KS03_RS17005	CDS	990358	990799	442	hypothetical protein				2A7V0@1|root,30WU6@2|Bacteria,1PIIN@1224|Proteobacteria,2W75F@28216|Betaproteobacteria,1KDVJ@119060|Burkholderiaceae	-	-
ATCC_33617	chromosome	chromosome:I	KS03_RS17015	CDS	991287	991647	361	single-stranded DNA-binding protein	1	F:GO:0003677	F:DNA binding	COG0629@1|root,COG0629@2|Bacteria,1N0VH@1224|Proteobacteria,2VVZ6@28216|Betaproteobacteria,1K7U4@119060|Burkholderiaceae	L	Single-strand binding protein family
ATCC_33617	chromosome	chromosome:I	KS03_RS17020	CDS	991959	993900	1942	AAA family ATPase	1	F:GO:0016817	F:hydrolase activity, acting on acid anhydrides	COG3598@1|root,COG4643@1|root,COG3598@2|Bacteria,COG4643@2|Bacteria,1R4EA@1224|Proteobacteria,2VKG4@28216|Betaproteobacteria,1K0AY@119060|Burkholderiaceae	L	AAA domain	K06919	K06919; putative DNA primase/helicase		Replication and repair	Unclassified: genetic information processing	Not Included in Pathway or Brite	PF13481	AAA domain
ATCC_33617	chromosome	chromosome:I	KS03_RS17020	CDS	991959	993900	1942	AAA family ATPase	1	F:GO:0016817	F:hydrolase activity, acting on acid anhydrides	COG3598@1|root,COG4643@1|root,COG3598@2|Bacteria,COG4643@2|Bacteria,1R4EA@1224|Proteobacteria,2VKG4@28216|Betaproteobacteria,1K0AY@119060|Burkholderiaceae	L	AAA domain	K06919	K06919; putative DNA primase/helicase		Replication and repair	Unclassified: genetic information processing	Not Included in Pathway or Brite	PF08707	Primase C terminal 2 (PriCT-2)
ATCC_33617	chromosome	chromosome:I	KS03_RS17025	CDS	993896	994385	490	hypothetical protein
ATCC_33617	chromosome	chromosome:I	KS03_RS17030	CDS	994377	994794	418	hypothetical protein
ATCC_33617	chromosome	chromosome:I	KS03_RS17035	CDS	994786	994981	196	hypothetical protein
ATCC_33617	chromosome	chromosome:I	KS03_RS17040	CDS	994980	995274	295	hypothetical protein				COG3311@1|root,COG3311@2|Bacteria,1NH0S@1224|Proteobacteria,2VYW2@28216|Betaproteobacteria,1KBFW@119060|Burkholderiaceae	K	Transcriptional regulator
ATCC_33617	chromosome	chromosome:I	KS03_RS32450	CDS	995424	996021	598	hypothetical protein
ATCC_33617	chromosome	chromosome:I	KS03_RS17045	CDS	996197	996386	190	hypothetical protein
ATCC_33617	chromosome	chromosome:I	KS03_RS32875	CDS	1128120	1128534	415	helix-turn-helix domain-containing protein				2BFNA@1|root,329GP@2|Bacteria,1PWIN@1224|Proteobacteria,2VYW6@28216|Betaproteobacteria,1K9P9@119060|Burkholderiaceae	-	-							PF12728	Helix-turn-helix domain
ATCC_33617	chromosome	chromosome:I	KS03_RS32880	CDS	1128526	1128823	298	hypothetical protein				2A7TC@1|root,30WSE@2|Bacteria,1PIGQ@1224|Proteobacteria,2W73F@28216|Betaproteobacteria,1KDPT@119060|Burkholderiaceae	-	-
ATCC_33617	chromosome	chromosome:I	KS03_RS17605	CDS	1129143	1131936	2794	toprim domain-containing protein	8	P:GO:0006260; P:GO:0006269; F:GO:0003677; F:GO:0003899; F:GO:0008270; F:GO:0016740; F:GO:0016779; C:GO:1990077	P:DNA replication; P:DNA replication, synthesis of RNA primer; F:DNA binding; F:DNA-directed 5'-3' RNA polymerase activity; F:zinc ion binding; F:transferase activity; F:nucleotidyltransferase activity; C:primosome complex	COG0358@1|root,COG0358@2|Bacteria,1MWQW@1224|Proteobacteria,2VMNR@28216|Betaproteobacteria,1K5MI@119060|Burkholderiaceae	L	Toprim domain							PF13362	Toprim domain
ATCC_33617	chromosome	chromosome:I	KS03_RS17610	CDS	1131938	1132187	250	hypothetical protein				2ANQA@1|root,31DPW@2|Bacteria,1QB16@1224|Proteobacteria,2WDQM@28216|Betaproteobacteria,1KAT8@119060|Burkholderiaceae	-	-
ATCC_33617	chromosome	chromosome:I	KS03_RS17615	CDS	1132183	1132546	364	hypothetical protein				2C9TM@1|root,2ZYZE@2|Bacteria,1PXVZ@1224|Proteobacteria,2WD6V@28216|Betaproteobacteria,1K9IS@119060|Burkholderiaceae	-	-
ATCC_33617	chromosome	chromosome:I	KS03_RS17620	CDS	1132549	1132744	196	hypothetical protein	2	C:GO:0016020; C:GO:0016021	C:membrane; C:integral component of membrane	2AF1I@1|root,314ZX@2|Bacteria,1PUYF@1224|Proteobacteria,2WAZX@28216|Betaproteobacteria,1KATF@119060|Burkholderiaceae	-	-
ATCC_33617	chromosome	chromosome:I	KS03_RS17625	CDS	1132787	1132982	196	hypothetical protein				2BHEE@1|root,32BGF@2|Bacteria,1PYHQ@1224|Proteobacteria,2WDQ5@28216|Betaproteobacteria,1KAS5@119060|Burkholderiaceae	-	-
ATCC_33617	chromosome	chromosome:I	KS03_RS17630	CDS	1132986	1133181	196	hypothetical protein				2ANGB@1|root,31DEZ@2|Bacteria,1QAN9@1224|Proteobacteria,2W7KB@28216|Betaproteobacteria,1KERX@119060|Burkholderiaceae	-	-
ATCC_33617	chromosome	chromosome:I	KS03_RS17635	CDS	1133269	1133518	250	ogr/Delta-like zinc finger family protein				2DQV5@1|root,338VZ@2|Bacteria,1N9ZS@1224|Proteobacteria,2VXKI@28216|Betaproteobacteria,1KAX6@119060|Burkholderiaceae	S	Ogr/Delta-like zinc finger							PF04606	Ogr/Delta-like zinc finger
ATCC_33617	chromosome	chromosome:I	KS03_RS30155	CDS	1133545	1133737	193	hypothetical protein				2EQVB@1|root,33IF4@2|Bacteria,1NQE1@1224|Proteobacteria,2W5RH@28216|Betaproteobacteria,1KBD3@119060|Burkholderiaceae	-	-
ATCC_33617	chromosome	chromosome:I	KS03_RS17645	CDS	1133765	1133957	193	hypothetical protein				294YY@1|root,2ZSBU@2|Bacteria,1P5P0@1224|Proteobacteria,2W5Z8@28216|Betaproteobacteria,1KB3E@119060|Burkholderiaceae	-	-
ATCC_33617	chromosome	chromosome:I	KS03_RS17650	CDS	1133973	1134201	229	hypothetical protein				2AH5F@1|root,317F6@2|Bacteria,1PYRI@1224|Proteobacteria,2WDW7@28216|Betaproteobacteria,1KB4I@119060|Burkholderiaceae	-	-
ATCC_33617	chromosome	chromosome:I	KS03_RS17655	CDS	1134276	1134768	493	helix-turn-helix domain-containing protein	1	F:GO:0003677	F:DNA binding	COG1396@1|root,COG1396@2|Bacteria,1N81W@1224|Proteobacteria,2VXQ9@28216|Betaproteobacteria	K	TRANSCRIPTIONal
ATCC_33617	chromosome	chromosome:I	KS03_RS17660	CDS	1134758	1135139	382	LysR family transcriptional regulator	2	P:GO:0006355; F:GO:0003700	P:regulation of transcription, DNA-templated; F:DNA-binding transcription factor activity	COG0583@1|root,COG0583@2|Bacteria,1MWVB@1224|Proteobacteria,1S2GV@1236|Gammaproteobacteria	K	transcriptional regulator							PF00126	Bacterial regulatory helix-turn-helix protein, lysR family
ATCC_33617	chromosome	chromosome:I	KS03_RS17670	CDS	1135604	1136759	1156	phage late control D family protein				COG3500@1|root,COG3500@2|Bacteria,1MXT8@1224|Proteobacteria,2VN6E@28216|Betaproteobacteria,1K1IT@119060|Burkholderiaceae	S	Phage late control gene D protein (GPD)							PF05954	Phage tail baseplate hub (GPD)
ATCC_33617	chromosome	chromosome:I	KS03_RS17675	CDS	1136755	1137184	430	phage tail protein				COG3499@1|root,COG3499@2|Bacteria,1MZJ7@1224|Proteobacteria,2VU06@28216|Betaproteobacteria,1K7XY@119060|Burkholderiaceae	S	tail protein							PF06995	Phage P2 GpU
ATCC_33617	chromosome	chromosome:I	KS03_RS17680	CDS	1137197	1140449	3253	hypothetical protein	2	C:GO:0016020; C:GO:0016021	C:membrane; C:integral component of membrane	COG4942@1|root,COG4942@2|Bacteria,1QTW5@1224|Proteobacteria,2WGFW@28216|Betaproteobacteria,1K552@119060|Burkholderiaceae	D	peptidase
ATCC_33617	chromosome	chromosome:I	KS03_RS30160	CDS	1140445	1140565	121	GpE family phage tail protein				4QGSB@10239|Viruses,4QVSX@35237|dsDNA viruses no RNA stage,4QU41@28883|Caudovirales,4QJVK@10662|Myoviridae	S	Phage P2 GpE							PF06528	Phage P2 GpE
ATCC_33617	chromosome	chromosome:I	KS03_RS17690	CDS	1140564	1140876	313	phage tail assembly protein				2E3XV@1|root,32YUV@2|Bacteria,1N720@1224|Proteobacteria,2VW8H@28216|Betaproteobacteria,1K9BX@119060|Burkholderiaceae	S	Phage tail assembly chaperone proteins, E, or 41 or 14							PF10109	Phage tail assembly chaperone proteins, E, or 41 or 14
ATCC_33617	chromosome	chromosome:I	KS03_RS17695	CDS	1140909	1141419	511	phage major tail tube protein				COG3498@1|root,COG3498@2|Bacteria,1Q8HB@1224|Proteobacteria,2VS7R@28216|Betaproteobacteria,1KHFM@119060|Burkholderiaceae	S	major tail							PF04985	Phage tail tube protein FII
ATCC_33617	chromosome	chromosome:I	KS03_RS17700	CDS	1141448	1142621	1174	phage tail sheath protein				COG3497@1|root,COG3497@2|Bacteria,1MW1V@1224|Proteobacteria,2VHUW@28216|Betaproteobacteria,1K278@119060|Burkholderiaceae	S	tail sheath protein							PF17482	Phage tail sheath C-terminal domain
ATCC_33617	chromosome	chromosome:I	KS03_RS17700	CDS	1141448	1142621	1174	phage tail sheath protein				COG3497@1|root,COG3497@2|Bacteria,1MW1V@1224|Proteobacteria,2VHUW@28216|Betaproteobacteria,1K278@119060|Burkholderiaceae	S	tail sheath protein							PF04984	Phage tail sheath protein subtilisin-like domain
ATCC_33617	chromosome	chromosome:I	KS03_RS17705	CDS	1142732	1143482	751	site-specific DNA-methyltransferase	7	P:GO:0006306; P:GO:0032259; F:GO:0003676; F:GO:0003677; F:GO:0008168; F:GO:0008170; F:GO:0016740	P:DNA methylation; P:methylation; F:nucleic acid binding; F:DNA binding; F:methyltransferase activity; F:N-methyltransferase activity; F:transferase activity	COG0863@1|root,COG0863@2|Bacteria,1PPM7@1224|Proteobacteria,2VR7S@28216|Betaproteobacteria,1K59G@119060|Burkholderiaceae	L	Belongs to the N(4) N(6)-methyltransferase family							PF01555	DNA methylase
ATCC_33617	chromosome	chromosome:I	KS03_RS30165	CDS	1143459	1143642	184	Com family DNA-binding transcriptional regulator	1	F:GO:0003677	F:DNA binding	COG4416@1|root,COG4416@2|Bacteria,1NK71@1224|Proteobacteria,2VYVE@28216|Betaproteobacteria	S	Mu-like prophage protein Com							PF10122	Mu-like prophage protein Com
ATCC_33617	chromosome	chromosome:I	KS03_RS17710	CDS	1143791	1144130	340	hypothetical protein				2DRMY@1|root,33CBP@2|Bacteria,1NJJ0@1224|Proteobacteria,2VYFU@28216|Betaproteobacteria,1KBAM@119060|Burkholderiaceae	-	-
ATCC_33617	chromosome	chromosome:I	KS03_RS17715	CDS	1144187	1144619	433	phage tail assembly chaperone				2DC5D@1|root,2ZCYP@2|Bacteria,1P8BJ@1224|Proteobacteria,2W68I@28216|Betaproteobacteria,1KA4Z@119060|Burkholderiaceae	S	Phage tail assembly chaperone protein							PF16778	Phage tail assembly chaperone protein
ATCC_33617	chromosome	chromosome:I	KS03_RS17720	CDS	1144615	1147723	3109	hypothetical protein				COG4675@1|root,COG4675@2|Bacteria,1RESM@1224|Proteobacteria,2VTNP@28216|Betaproteobacteria,1K58V@119060|Burkholderiaceae	S	tail collar domain protein
ATCC_33617	chromosome	chromosome:I	KS03_RS17725	CDS	1147728	1148280	553	phage tail protein I				COG4385@1|root,COG4385@2|Bacteria,1NZST@1224|Proteobacteria,2VSHH@28216|Betaproteobacteria,1K732@119060|Burkholderiaceae	S	Tail protein I							PF09684	Phage tail protein (Tail_P2_I)
ATCC_33617	chromosome	chromosome:I	KS03_RS17730	CDS	1148272	1149178	907	baseplate J/gp47 family protein				COG3948@1|root,COG3948@2|Bacteria,1MUFF@1224|Proteobacteria,2VQAF@28216|Betaproteobacteria,1K200@119060|Burkholderiaceae	S	Baseplate assembly protein							PF04865	Baseplate J-like protein
ATCC_33617	chromosome	chromosome:I	KS03_RS17735	CDS	1149174	1149540	367	GPW/gp25 family protein				COG3628@1|root,COG3628@2|Bacteria,1N7WS@1224|Proteobacteria,2VVVK@28216|Betaproteobacteria,1K9S6@119060|Burkholderiaceae	S	Gene 25-like lysozyme							PF04965	Baseplate wedge protein gp25
ATCC_33617	chromosome	chromosome:I	KS03_RS17740	CDS	1149536	1150244	709	phage baseplate assembly protein V				4QC8P@10239|Viruses,4QVGB@35237|dsDNA viruses no RNA stage,4QQU4@28883|Caudovirales,4QI43@10662|Myoviridae	S	Phage-related baseplate assembly protein							PF04717	Type VI secretion system/phage-baseplate injector OB domain
ATCC_33617	chromosome	chromosome:I	KS03_RS17745	CDS	1150329	1151091	763	GIY-YIG nuclease family protein													PF10544	T5orf172 domain
ATCC_33617	chromosome	chromosome:I	KS03_RS17750	CDS	1151144	1151594	451	phage virion morphogenesis protein				COG5005@1|root,COG5005@2|Bacteria,1MZCV@1224|Proteobacteria,2VUUR@28216|Betaproteobacteria,1K7SX@119060|Burkholderiaceae	S	Phage virion morphogenesis protein							PF05069	Phage virion morphogenesis family
ATCC_33617	chromosome	chromosome:I	KS03_RS17755	CDS	1151593	1152004	412	phage tail protein				2CBI4@1|root,32RTF@2|Bacteria,1MZ82@1224|Proteobacteria,2VVJ6@28216|Betaproteobacteria,1K8H7@119060|Burkholderiaceae	S	Bacteriophage P2 Tail completion protein							PF06891	P2 phage tail completion protein R (GpR)
ATCC_33617	chromosome	chromosome:I	KS03_RS17760	CDS	1152000	1152492	493	hypothetical protein				28MZ2@1|root,2ZB5W@2|Bacteria,1MZ8Q@1224|Proteobacteria,2WE9U@28216|Betaproteobacteria,1KFUQ@119060|Burkholderiaceae	-	-
ATCC_33617	chromosome	chromosome:I	KS03_RS17765	CDS	1152488	1153289	802	N-acetylmuramidase domain-containing protein				COG3409@1|root,COG3409@2|Bacteria,1RAYU@1224|Proteobacteria,2VPG4@28216|Betaproteobacteria,1K3UH@119060|Burkholderiaceae	M	Pfam:DUF3380							PF11860	N-acetylmuramidase
ATCC_33617	chromosome	chromosome:I	KS03_RS17765	CDS	1152488	1153289	802	N-acetylmuramidase domain-containing protein				COG3409@1|root,COG3409@2|Bacteria,1RAYU@1224|Proteobacteria,2VPG4@28216|Betaproteobacteria,1K3UH@119060|Burkholderiaceae	M	Pfam:DUF3380							PF01471	Putative peptidoglycan binding domain
ATCC_33617	chromosome	chromosome:I	KS03_RS17770	CDS	1153281	1153602	322	phage holin family protein				2DN6I@1|root,32VTH@2|Bacteria,1N3YE@1224|Proteobacteria,2VWEA@28216|Betaproteobacteria,1KAGB@119060|Burkholderiaceae	S	Putative 3TM holin, Phage_holin_3							PF05449	Putative 3TM holin, Phage_holin_3
ATCC_33617	chromosome	chromosome:I	KS03_RS17775	CDS	1153601	1153976	376	phage holin family protein	2	C:GO:0016020; C:GO:0016021	C:membrane; C:integral component of membrane	2BIF6@1|root,32CMP@2|Bacteria,1PUEG@1224|Proteobacteria,2VX6R@28216|Betaproteobacteria,1KFUD@119060|Burkholderiaceae	S	Putative phage holin							PF16931	Putative phage holin
ATCC_33617	chromosome	chromosome:I	KS03_RS17780	CDS	1153978	1154191	214	tail protein X				COG5004@1|root,COG5004@2|Bacteria,1N81H@1224|Proteobacteria,2VWMM@28216|Betaproteobacteria,1KAMZ@119060|Burkholderiaceae	S	Phage Tail Protein X							PF05489	Phage Tail Protein X
ATCC_33617	chromosome	chromosome:I	KS03_RS31500	CDS	1154190	1154427	238	hypothetical protein
ATCC_33617	chromosome	chromosome:I	KS03_RS17785	CDS	1154426	1154909	484	head completion/stabilization protein	1	P:GO:0019069	P:viral capsid assembly	2CM6Y@1|root,32SDV@2|Bacteria,1N0DS@1224|Proteobacteria,2VUG9@28216|Betaproteobacteria,1K7V9@119060|Burkholderiaceae	S	Phage head completion protein (GPL)							PF05926	Phage head completion protein (GPL)
ATCC_33617	chromosome	chromosome:I	KS03_RS17790	CDS	1155013	1155700	688	terminase endonuclease subunit	4	P:GO:0019069; P:GO:0090305; F:GO:0003677; F:GO:0004519	P:viral capsid assembly; P:nucleic acid phosphodiester bond hydrolysis; F:DNA binding; F:endonuclease activity	2DKUP@1|root,30DH1@2|Bacteria,1RDUB@1224|Proteobacteria,2VTDJ@28216|Betaproteobacteria,1K7RR@119060|Burkholderiaceae	L	Phage small terminase subunit							PF05944	Phage small terminase subunit
ATCC_33617	chromosome	chromosome:I	KS03_RS17795	CDS	1155696	1156716	1021	phage major capsid protein, P2 family				2CCQ9@1|root,2Z7HY@2|Bacteria,1MUWR@1224|Proteobacteria,2VJTE@28216|Betaproteobacteria,1K1QI@119060|Burkholderiaceae	S	phage major capsid protein, P2 family							PF05125	Phage major capsid protein, P2 family
ATCC_33617	chromosome	chromosome:I	KS03_RS17800	CDS	1156752	1157577	826	GPO family capsid scaffolding protein				2CAV1@1|root,2ZBY8@2|Bacteria,1RAGI@1224|Proteobacteria,2VQQU@28216|Betaproteobacteria,1JZP9@119060|Burkholderiaceae	S	capsid scaffolding							PF05929	Phage capsid scaffolding protein (GPO) serine peptidase
ATCC_33617	chromosome	chromosome:I	KS03_RS17805	CDS	1157721	1159473	1753	terminase ATPase subunit family protein	2	P:GO:0019069; F:GO:0005524	P:viral capsid assembly; F:ATP binding	COG5484@1|root,COG5484@2|Bacteria,1QTWB@1224|Proteobacteria,2WGG0@28216|Betaproteobacteria,1KIDR@119060|Burkholderiaceae	S	Terminase RNaseH-like domain							PF03237	Terminase large subunit, T4likevirus-type, N-terminal
ATCC_33617	chromosome	chromosome:I	KS03_RS17805	CDS	1157721	1159473	1753	terminase ATPase subunit family protein	2	P:GO:0019069; F:GO:0005524	P:viral capsid assembly; F:ATP binding	COG5484@1|root,COG5484@2|Bacteria,1QTWB@1224|Proteobacteria,2WGG0@28216|Betaproteobacteria,1KIDR@119060|Burkholderiaceae	S	Terminase RNaseH-like domain							PF17289	Terminase RNaseH-like domain
ATCC_33617	chromosome	chromosome:I	KS03_RS17805	CDS	1157721	1159473	1753	terminase ATPase subunit family protein	2	P:GO:0019069; F:GO:0005524	P:viral capsid assembly; F:ATP binding	COG5484@1|root,COG5484@2|Bacteria,1QTWB@1224|Proteobacteria,2WGG0@28216|Betaproteobacteria,1KIDR@119060|Burkholderiaceae	S	Terminase RNaseH-like domain							PF06056	Putative ATPase subunit of terminase (gpP-like)
ATCC_33617	chromosome	chromosome:I	KS03_RS17810	CDS	1159472	1160525	1054	phage portal protein				COG4695@1|root,COG4695@2|Bacteria,1MWA5@1224|Proteobacteria,2VNDU@28216|Betaproteobacteria,1K44H@119060|Burkholderiaceae	S	portal protein
ATCC_33617	chromosome	chromosome:I	KS03_RS17815	CDS	1160946	1161363	418	hypothetical protein	2	C:GO:0016020; C:GO:0016021	C:membrane; C:integral component of membrane
ATCC_33617	chromosome	chromosome:I	KS03_RS17820	CDS	1161362	1161827	466	DUF4065 domain-containing protein				COG3600@1|root,COG3600@2|Bacteria,1N78U@1224|Proteobacteria,2UGBJ@28211|Alphaproteobacteria	S	Phage-associated protein							PF13274	Protein of unknown function (DUF4065)
ATCC_33617	chromosome	chromosome:I	KS03_RS31505	CDS	1162203	1163547	1345	FRG domain-containing protein				2BW9C@1|root,30C5P@2|Bacteria,1RGEH@1224|Proteobacteria,1TJ4H@1236|Gammaproteobacteria,1Y0I1@135623|Vibrionales	-	-							PF08867	FRG domain
ATCC_33617	chromosome	chromosome:I	KS03_RS17830	CDS	1163606	1164719	1114	DUF3396 domain-containing protein				4QARV@10239|Viruses,4QYE1@35237|dsDNA viruses no RNA stage,4QQXZ@28883|Caudovirales,4QI9G@10662|Myoviridae	S	Protein of unknown function (DUF3396)							PF11876	Protein of unknown function (DUF3396)
ATCC_33617	chromosome	chromosome:I	KS03_RS17835	CDS	1164728	1165457	730	VRR-NUC domain-containing protein	4	P:GO:0090305; F:GO:0004518; F:GO:0016787; F:GO:0016788	P:nucleic acid phosphodiester bond hydrolysis; F:nuclease activity; F:hydrolase activity; F:hydrolase activity, acting on ester bonds	COG3501@1|root,COG3501@2|Bacteria,1RJQX@1224|Proteobacteria,2WG2Y@28216|Betaproteobacteria,1K766@119060|Burkholderiaceae	S	Rhs element vgr protein							PF08774	VRR-NUC domain
ATCC_33617	chromosome	chromosome:I	KS03_RS17840	CDS	1165453	1165981	529	PAAR domain-containing protein				COG4104@1|root,COG4104@2|Bacteria,1N6T7@1224|Proteobacteria,2VWU9@28216|Betaproteobacteria,1K893@119060|Burkholderiaceae	S	PAAR motif							PF05488	PAAR motif
ATCC_33617	chromosome	chromosome:I	KS03_RS31510	CDS	1166107	1166752	646	hypothetical protein
ATCC_33617	chromosome	chromosome:I	KS03_RS17850	CDS	1167037	1167802	766	hypothetical protein				2E2W5@1|root,32XXJ@2|Bacteria	-	-
ATCC_33617	chromosome	chromosome:I	KS03_RS17855	CDS	1168176	1169223	1048	IS481 family transposase	2	P:GO:0015074; F:GO:0003676	P:DNA integration; F:nucleic acid binding	COG2801@1|root,COG2801@2|Bacteria,1MZ45@1224|Proteobacteria,2VNA0@28216|Betaproteobacteria,1K69X@119060|Burkholderiaceae	L	Integrase core domain							PF13683	Integrase core domain
ATCC_33617	chromosome	chromosome:I	KS03_RS17855	CDS	1168176	1169223	1048	IS481 family transposase	2	P:GO:0015074; F:GO:0003676	P:DNA integration; F:nucleic acid binding	COG2801@1|root,COG2801@2|Bacteria,1MZ45@1224|Proteobacteria,2VNA0@28216|Betaproteobacteria,1K69X@119060|Burkholderiaceae	L	Integrase core domain							PF13551	Winged helix-turn helix
ATCC_33617	chromosome	chromosome:I	KS03_RS17860	pseudo	1169336	1170445	1110
ATCC_33617	chromosome	chromosome:I	KS03_RS17865	CDS	1170814	1171147	334	hypothetical protein
ATCC_33617	chromosome	chromosome:I	KS03_RS17870	CDS	1171560	1172484	925	carbon-nitrogen hydrolase family protein	7	P:GO:0006807; F:GO:0000257; F:GO:0003824; F:GO:0016740; F:GO:0016746; F:GO:0016787; F:GO:0080061	P:nitrogen compound metabolic process; F:nitrilase activity; F:catalytic activity; F:transferase activity; F:acyltransferase activity; F:hydrolase activity; F:indole-3-acetonitrile nitrilase activity	COG0388@1|root,COG0388@2|Bacteria,1MWQG@1224|Proteobacteria,2VRMQ@28216|Betaproteobacteria,1K46S@119060|Burkholderiaceae	S	nitrilase	K01501	E3.5.5.1; nitrilase	[EC:3.5.5.1]	Nitrogen metabolism	Energy metabolism	Metabolism	PF00795	Carbon-nitrogen hydrolase
ATCC_33617	chromosome	chromosome:I	KS03_RS17870	CDS	1171560	1172484	925	carbon-nitrogen hydrolase family protein	7	P:GO:0006807; F:GO:0000257; F:GO:0003824; F:GO:0016740; F:GO:0016746; F:GO:0016787; F:GO:0080061	P:nitrogen compound metabolic process; F:nitrilase activity; F:catalytic activity; F:transferase activity; F:acyltransferase activity; F:hydrolase activity; F:indole-3-acetonitrile nitrilase activity	COG0388@1|root,COG0388@2|Bacteria,1MWQG@1224|Proteobacteria,2VRMQ@28216|Betaproteobacteria,1K46S@119060|Burkholderiaceae	S	nitrilase	K01501	E3.5.5.1; nitrilase	[EC:3.5.5.1]	Tryptophan metabolism	Amino acid metabolism	Metabolism	PF00795	Carbon-nitrogen hydrolase
ATCC_33617	chromosome	chromosome:I	KS03_RS17870	CDS	1171560	1172484	925	carbon-nitrogen hydrolase family protein	7	P:GO:0006807; F:GO:0000257; F:GO:0003824; F:GO:0016740; F:GO:0016746; F:GO:0016787; F:GO:0080061	P:nitrogen compound metabolic process; F:nitrilase activity; F:catalytic activity; F:transferase activity; F:acyltransferase activity; F:hydrolase activity; F:indole-3-acetonitrile nitrilase activity	COG0388@1|root,COG0388@2|Bacteria,1MWQG@1224|Proteobacteria,2VRMQ@28216|Betaproteobacteria,1K46S@119060|Burkholderiaceae	S	nitrilase	K01501	E3.5.5.1; nitrilase	[EC:3.5.5.1]	Cyanoamino acid metabolism	Metabolism of other amino acids	Metabolism	PF00795	Carbon-nitrogen hydrolase
ATCC_33617	chromosome	chromosome:I	KS03_RS17870	CDS	1171560	1172484	925	carbon-nitrogen hydrolase family protein	7	P:GO:0006807; F:GO:0000257; F:GO:0003824; F:GO:0016740; F:GO:0016746; F:GO:0016787; F:GO:0080061	P:nitrogen compound metabolic process; F:nitrilase activity; F:catalytic activity; F:transferase activity; F:acyltransferase activity; F:hydrolase activity; F:indole-3-acetonitrile nitrilase activity	COG0388@1|root,COG0388@2|Bacteria,1MWQG@1224|Proteobacteria,2VRMQ@28216|Betaproteobacteria,1K46S@119060|Burkholderiaceae	S	nitrilase	K01501	E3.5.5.1; nitrilase	[EC:3.5.5.1]	Aminobenzoate degradation	Xenobiotics biodegradation and metabolism	Metabolism	PF00795	Carbon-nitrogen hydrolase
ATCC_33617	chromosome	chromosome:I	KS03_RS17870	CDS	1171560	1172484	925	carbon-nitrogen hydrolase family protein	7	P:GO:0006807; F:GO:0000257; F:GO:0003824; F:GO:0016740; F:GO:0016746; F:GO:0016787; F:GO:0080061	P:nitrogen compound metabolic process; F:nitrilase activity; F:catalytic activity; F:transferase activity; F:acyltransferase activity; F:hydrolase activity; F:indole-3-acetonitrile nitrilase activity	COG0388@1|root,COG0388@2|Bacteria,1MWQG@1224|Proteobacteria,2VRMQ@28216|Betaproteobacteria,1K46S@119060|Burkholderiaceae	S	nitrilase	K01501	E3.5.5.1; nitrilase	[EC:3.5.5.1]	Styrene degradation	Xenobiotics biodegradation and metabolism	Metabolism	PF00795	Carbon-nitrogen hydrolase
ATCC_33617	chromosome	chromosome:I	KS03_RS17875	CDS	1172662	1173604	943	LysR family transcriptional regulator	2	P:GO:0006355; F:GO:0003700	P:regulation of transcription, DNA-templated; F:DNA-binding transcription factor activity	COG0583@1|root,COG0583@2|Bacteria,1R61D@1224|Proteobacteria,2W117@28216|Betaproteobacteria,1K5PJ@119060|Burkholderiaceae	K	LysR substrate binding domain	K18297	mexT; LysR family transcriptional regulator, mexEF-oprN operon transcriptional activator		Transcription factors	Protein families: genetic information processing	Brite Hierarchies	PF03466	LysR substrate binding domain
ATCC_33617	chromosome	chromosome:I	KS03_RS17875	CDS	1172662	1173604	943	LysR family transcriptional regulator	2	P:GO:0006355; F:GO:0003700	P:regulation of transcription, DNA-templated; F:DNA-binding transcription factor activity	COG0583@1|root,COG0583@2|Bacteria,1R61D@1224|Proteobacteria,2W117@28216|Betaproteobacteria,1K5PJ@119060|Burkholderiaceae	K	LysR substrate binding domain	K18297	mexT; LysR family transcriptional regulator, mexEF-oprN operon transcriptional activator		Transcription factors	Protein families: genetic information processing	Brite Hierarchies	PF00126	Bacterial regulatory helix-turn-helix protein, lysR family
ATCC_33617	chromosome	chromosome:I	KS03_RS17875	CDS	1172662	1173604	943	LysR family transcriptional regulator	2	P:GO:0006355; F:GO:0003700	P:regulation of transcription, DNA-templated; F:DNA-binding transcription factor activity	COG0583@1|root,COG0583@2|Bacteria,1R61D@1224|Proteobacteria,2W117@28216|Betaproteobacteria,1K5PJ@119060|Burkholderiaceae	K	LysR substrate binding domain	K18297	mexT; LysR family transcriptional regulator, mexEF-oprN operon transcriptional activator		Antimicrobial resistance genes	Protein families: signaling and cellular processes	Brite Hierarchies	PF03466	LysR substrate binding domain
ATCC_33617	chromosome	chromosome:I	KS03_RS17875	CDS	1172662	1173604	943	LysR family transcriptional regulator	2	P:GO:0006355; F:GO:0003700	P:regulation of transcription, DNA-templated; F:DNA-binding transcription factor activity	COG0583@1|root,COG0583@2|Bacteria,1R61D@1224|Proteobacteria,2W117@28216|Betaproteobacteria,1K5PJ@119060|Burkholderiaceae	K	LysR substrate binding domain	K18297	mexT; LysR family transcriptional regulator, mexEF-oprN operon transcriptional activator		Antimicrobial resistance genes	Protein families: signaling and cellular processes	Brite Hierarchies	PF00126	Bacterial regulatory helix-turn-helix protein, lysR family
ATCC_33617	chromosome	chromosome:I	KS03_RS18990	CDS	1399629	1400847	1219	tyrosine-type recombinase/integrase	6	P:GO:0006310; P:GO:0015074; P:GO:0044826; P:GO:0046718; P:GO:0075713; F:GO:0003677	P:DNA recombination; P:DNA integration; P:viral genome integration into host DNA; P:viral entry into host cell; P:establishment of integrated proviral latency; F:DNA binding	COG0582@1|root,COG0582@2|Bacteria,1MU23@1224|Proteobacteria,2VHG5@28216|Betaproteobacteria,1KFH3@119060|Burkholderiaceae	L	Belongs to the 'phage' integrase family							PF00589	Phage integrase family
ATCC_33617	chromosome	chromosome:I	KS03_RS18990	CDS	1399629	1400847	1219	tyrosine-type recombinase/integrase	6	P:GO:0006310; P:GO:0015074; P:GO:0044826; P:GO:0046718; P:GO:0075713; F:GO:0003677	P:DNA recombination; P:DNA integration; P:viral genome integration into host DNA; P:viral entry into host cell; P:establishment of integrated proviral latency; F:DNA binding	COG0582@1|root,COG0582@2|Bacteria,1MU23@1224|Proteobacteria,2VHG5@28216|Betaproteobacteria,1KFH3@119060|Burkholderiaceae	L	Belongs to the 'phage' integrase family							PF13356	Arm DNA-binding domain
ATCC_33617	chromosome	chromosome:I	KS03_RS18995	CDS	1401463	1404325	2863	DUF927 domain-containing protein	1	F:GO:0016817	F:hydrolase activity, acting on acid anhydrides	COG4643@1|root,COG5519@1|root,COG4643@2|Bacteria,COG5519@2|Bacteria,1MW5H@1224|Proteobacteria,2VHZ7@28216|Betaproteobacteria,1KGXR@119060|Burkholderiaceae	L	Domain of unknown function (DUF927)	K06919	K06919; putative DNA primase/helicase		Replication and repair	Unclassified: genetic information processing	Not Included in Pathway or Brite	PF13362	Toprim domain
ATCC_33617	chromosome	chromosome:I	KS03_RS18995	CDS	1401463	1404325	2863	DUF927 domain-containing protein	1	F:GO:0016817	F:hydrolase activity, acting on acid anhydrides	COG4643@1|root,COG5519@1|root,COG4643@2|Bacteria,COG5519@2|Bacteria,1MW5H@1224|Proteobacteria,2VHZ7@28216|Betaproteobacteria,1KGXR@119060|Burkholderiaceae	L	Domain of unknown function (DUF927)	K06919	K06919; putative DNA primase/helicase		Replication and repair	Unclassified: genetic information processing	Not Included in Pathway or Brite	PF08707	Primase C terminal 2 (PriCT-2)
ATCC_33617	chromosome	chromosome:I	KS03_RS18995	CDS	1401463	1404325	2863	DUF927 domain-containing protein	1	F:GO:0016817	F:hydrolase activity, acting on acid anhydrides	COG4643@1|root,COG5519@1|root,COG4643@2|Bacteria,COG5519@2|Bacteria,1MW5H@1224|Proteobacteria,2VHZ7@28216|Betaproteobacteria,1KGXR@119060|Burkholderiaceae	L	Domain of unknown function (DUF927)	K06919	K06919; putative DNA primase/helicase		Replication and repair	Unclassified: genetic information processing	Not Included in Pathway or Brite	PF06048	Domain of unknown function (DUF927)
ATCC_33617	chromosome	chromosome:I	KS03_RS19000	CDS	1404452	1404779	328	hypothetical protein				29K66@1|root,3073K@2|Bacteria,1PX0P@1224|Proteobacteria,2WCIF@28216|Betaproteobacteria,1K7XS@119060|Burkholderiaceae	-	-
ATCC_33617	chromosome	chromosome:I	KS03_RS19005	CDS	1404788	1405136	349	hypothetical protein				29FCG@1|root,302A5@2|Bacteria,1PIX6@1224|Proteobacteria,2W7GK@28216|Betaproteobacteria,1K7QR@119060|Burkholderiaceae	-	-
ATCC_33617	chromosome	chromosome:I	KS03_RS19010	CDS	1405128	1405341	214	hypothetical protein				2AGI5@1|root,316QS@2|Bacteria,1PXWR@1224|Proteobacteria,2WD7J@28216|Betaproteobacteria,1K9M3@119060|Burkholderiaceae	-	-
ATCC_33617	chromosome	chromosome:I	KS03_RS19015	CDS	1405333	1405636	304	hypothetical protein				2AGBZ@1|root,316HM@2|Bacteria,1PXM3@1224|Proteobacteria,2WD0E@28216|Betaproteobacteria,1K8XB@119060|Burkholderiaceae	-	-
ATCC_33617	chromosome	chromosome:I	KS03_RS32325	CDS	1405628	1405805	178	hypothetical protein				2ANSC@1|root,31DSB@2|Bacteria,1QB3F@1224|Proteobacteria,2WDR9@28216|Betaproteobacteria,1KAUK@119060|Burkholderiaceae	-	-
ATCC_33617	chromosome	chromosome:I	KS03_RS19020	CDS	1406132	1406657	526	hypothetical protein				2APNK@1|root,31ES5@2|Bacteria,1PWE0@1224|Proteobacteria,2WBYR@28216|Betaproteobacteria,1K6XG@119060|Burkholderiaceae	-	-
ATCC_33617	chromosome	chromosome:I	KS03_RS30220	CDS	1406653	1406896	244	AlpA family phage regulatory protein				COG3311@1|root,COG3311@2|Bacteria	K	DNA excision							PF05930	Prophage CP4-57 regulatory protein (AlpA)
ATCC_33617	chromosome	chromosome:I	KS03_RS22680	CDS	2241277	2241730	454	Hsp20/alpha crystallin family protein				COG0071@1|root,COG0071@2|Bacteria,1NA27@1224|Proteobacteria,2W72M@28216|Betaproteobacteria,1KDMH@119060|Burkholderiaceae	O	Hsp20/alpha crystallin family	K13993	HSP20; HSP20 family protein		Protein processing in endoplasmic reticulum	Folding, sorting and degradation	Genetic Information Processing	PF00011	Hsp20/alpha crystallin family
ATCC_33617	chromosome	chromosome:I	KS03_RS22680	CDS	2241277	2241730	454	Hsp20/alpha crystallin family protein				COG0071@1|root,COG0071@2|Bacteria,1NA27@1224|Proteobacteria,2W72M@28216|Betaproteobacteria,1KDMH@119060|Burkholderiaceae	O	Hsp20/alpha crystallin family	K13993	HSP20; HSP20 family protein		Chaperones and folding catalysts	Protein families: genetic information processing	Brite Hierarchies	PF00011	Hsp20/alpha crystallin family
ATCC_33617	chromosome	chromosome:I	KS03_RS22685	CDS	2241761	2242202	442	Hsp20/alpha crystallin family protein				COG0071@1|root,COG0071@2|Bacteria,1PSF3@1224|Proteobacteria,2WA7K@28216|Betaproteobacteria,1KDCC@119060|Burkholderiaceae	O	Hsp20/alpha crystallin family	K13993	HSP20; HSP20 family protein		Protein processing in endoplasmic reticulum	Folding, sorting and degradation	Genetic Information Processing	PF00011	Hsp20/alpha crystallin family
ATCC_33617	chromosome	chromosome:I	KS03_RS22685	CDS	2241761	2242202	442	Hsp20/alpha crystallin family protein				COG0071@1|root,COG0071@2|Bacteria,1PSF3@1224|Proteobacteria,2WA7K@28216|Betaproteobacteria,1KDCC@119060|Burkholderiaceae	O	Hsp20/alpha crystallin family	K13993	HSP20; HSP20 family protein		Chaperones and folding catalysts	Protein families: genetic information processing	Brite Hierarchies	PF00011	Hsp20/alpha crystallin family
ATCC_33617	chromosome	chromosome:I	KS03_RS31635	CDS	2324325	2324928	604	hypothetical protein
ATCC_33617	chromosome	chromosome:I	KS03_RS31640	CDS	2324990	2325176	187	hypothetical protein
ATCC_33617	chromosome	chromosome:I	KS03_RS31645	CDS	2325219	2325855	637	hypothetical protein				arCOG12990@1|root,32SGD@2|Bacteria,1N5I7@1224|Proteobacteria	-	-							PF18153	SMODS-associating 2TM, beta-strand rich effector domain
ATCC_33617	chromosome	chromosome:I	KS03_RS23060	CDS	2325864	2327001	1138	hypothetical protein				28MBW@1|root,2ZAQ9@2|Bacteria,1RG3N@1224|Proteobacteria	-	-
ATCC_33617	chromosome	chromosome:I	KS03_RS23065	CDS	2327087	2328311	1225	DUF4263 domain-containing protein				2DBKD@1|root,2Z9SP@2|Bacteria,1PCCH@1224|Proteobacteria,1RZ57@1236|Gammaproteobacteria	S	Domain of unknown function (DUF4263)							PF14082	Domain of unknown function (DUF4263)
ATCC_33617	chromosome	chromosome:I	KS03_RS23070	CDS	2328337	2328940	604	recombinase family protein	4	P:GO:0006310; P:GO:0015074; F:GO:0000150; F:GO:0003677	P:DNA recombination; P:DNA integration; F:DNA strand exchange activity; F:DNA binding	COG1961@1|root,COG1961@2|Bacteria,1R77A@1224|Proteobacteria,2VZRC@28216|Betaproteobacteria,1K5GH@119060|Burkholderiaceae	L	Resolvase, N terminal domain							PF00239	Resolvase, N terminal domain
ATCC_33617	chromosome	chromosome:I	KS03_RS32910	CDS	2329293	2329962	670	hypothetical protein				2DQPA@1|root,337WJ@2|Bacteria,1R39D@1224|Proteobacteria	-	-
ATCC_33617	chromosome	chromosome:I	KS03_RS23085	CDS	2329964	2331047	1084	XRE family transcriptional regulator				COG1396@1|root,COG2856@1|root,COG1396@2|Bacteria,COG2856@2|Bacteria,1NEHF@1224|Proteobacteria,2U45A@28211|Alphaproteobacteria,2K38F@204457|Sphingomonadales	K	Pfam:DUF955							PF01381	Helix-turn-helix
ATCC_33617	chromosome	chromosome:I	KS03_RS23085	CDS	2329964	2331047	1084	XRE family transcriptional regulator				COG1396@1|root,COG2856@1|root,COG1396@2|Bacteria,COG2856@2|Bacteria,1NEHF@1224|Proteobacteria,2U45A@28211|Alphaproteobacteria,2K38F@204457|Sphingomonadales	K	Pfam:DUF955							PF06114	IrrE N-terminal-like domain
ATCC_33617	chromosome	chromosome:I	KS03_RS23090	CDS	2331251	2334590	3340	hypothetical protein				COG0827@1|root,COG1002@1|root,COG0827@2|Bacteria,COG1002@2|Bacteria,2G84A@200795|Chloroflexi,376BB@32061|Chloroflexia	LV	Pfam:Methyltransf_26
ATCC_33617	chromosome	chromosome:I	KS03_RS23095	CDS	2334607	2337991	3385	phospholipase D-like domain-containing protein	4	P:GO:0090305; F:GO:0004386; F:GO:0004519; F:GO:0005524	P:nucleic acid phosphodiester bond hydrolysis; F:helicase activity; F:endonuclease activity; F:ATP binding	COG0553@1|root,COG0553@2|Bacteria,1NC5H@1224|Proteobacteria,2VJXT@28216|Betaproteobacteria,4A9M5@80864|Comamonadaceae	L	PFAM helicase domain protein							PF00271	Helicase conserved C-terminal domain
ATCC_33617	chromosome	chromosome:I	KS03_RS23095	CDS	2334607	2337991	3385	phospholipase D-like domain-containing protein	4	P:GO:0090305; F:GO:0004386; F:GO:0004519; F:GO:0005524	P:nucleic acid phosphodiester bond hydrolysis; F:helicase activity; F:endonuclease activity; F:ATP binding	COG0553@1|root,COG0553@2|Bacteria,1NC5H@1224|Proteobacteria,2VJXT@28216|Betaproteobacteria,4A9M5@80864|Comamonadaceae	L	PFAM helicase domain protein							PF13091	PLD-like domain
ATCC_33617	chromosome	chromosome:I	KS03_RS30375	CDS	2338809	2339064	256	hypothetical protein				2BHPC@1|root,32BSH@2|Bacteria,1PKHK@1224|Proteobacteria,2WAA6@28216|Betaproteobacteria,1K9EI@119060|Burkholderiaceae	-	-
ATCC_33617	chromosome	chromosome:I	KS03_RS23105	CDS	2339142	2340347	1206	IS3-like element ISBugl1 family transposase	5	P:GO:0006313; P:GO:0015074; F:GO:0003676; F:GO:0003677; F:GO:0004803	P:transposition, DNA-mediated; P:DNA integration; F:nucleic acid binding; F:DNA binding; F:transposase activity	COG2801@1|root,COG2963@1|root,COG2801@2|Bacteria,COG2963@2|Bacteria,1MY62@1224|Proteobacteria,2VJAF@28216|Betaproteobacteria,1K2XD@119060|Burkholderiaceae	L	transposase	K07497	K07497; putative transposase		Replication and repair	Unclassified: genetic information processing	Not Included in Pathway or Brite	PF00665	Integrase core domain
ATCC_33617	chromosome	chromosome:I	KS03_RS23105	CDS	2339142	2340347	1206	IS3-like element ISBugl1 family transposase	5	P:GO:0006313; P:GO:0015074; F:GO:0003676; F:GO:0003677; F:GO:0004803	P:transposition, DNA-mediated; P:DNA integration; F:nucleic acid binding; F:DNA binding; F:transposase activity	COG2801@1|root,COG2963@1|root,COG2801@2|Bacteria,COG2963@2|Bacteria,1MY62@1224|Proteobacteria,2VJAF@28216|Betaproteobacteria,1K2XD@119060|Burkholderiaceae	L	transposase	K07497	K07497; putative transposase		Replication and repair	Unclassified: genetic information processing	Not Included in Pathway or Brite	PF13276	HTH-like domain
ATCC_33617	chromosome	chromosome:I	KS03_RS23105	CDS	2339142	2340347	1206	IS3-like element ISBugl1 family transposase	5	P:GO:0006313; P:GO:0015074; F:GO:0003676; F:GO:0003677; F:GO:0004803	P:transposition, DNA-mediated; P:DNA integration; F:nucleic acid binding; F:DNA binding; F:transposase activity	COG2801@1|root,COG2963@1|root,COG2801@2|Bacteria,COG2963@2|Bacteria,1MY62@1224|Proteobacteria,2VJAF@28216|Betaproteobacteria,1K2XD@119060|Burkholderiaceae	L	transposase	K07497	K07497; putative transposase		Replication and repair	Unclassified: genetic information processing	Not Included in Pathway or Brite	PF01527	Transposase
ATCC_33617	chromosome	chromosome:I	KS03_RS30380	CDS	2340442	2341093	652	hypothetical protein				2EZA1@1|root,33SFP@2|Bacteria,1NSZ4@1224|Proteobacteria,2W0UP@28216|Betaproteobacteria,1K78Y@119060|Burkholderiaceae	-	-
ATCC_33617	chromosome	chromosome:I	KS03_RS30385	CDS	2341103	2341418	316	helix-turn-helix domain-containing protein	1	F:GO:0003677	F:DNA binding	COG1396@1|root,COG1396@2|Bacteria,1NGM7@1224|Proteobacteria,2WI7V@28216|Betaproteobacteria,1KG9E@119060|Burkholderiaceae	K	Helix-turn-helix domain							PF01381	Helix-turn-helix
ATCC_33617	chromosome	chromosome:I	KS03_RS23110	CDS	2341436	2342195	760	hypothetical protein
ATCC_33617	chromosome	chromosome:I	KS03_RS31650	CDS	2342287	2343022	736	hypothetical protein				2DNN1@1|root,32Y74@2|Bacteria,1NP7U@1224|Proteobacteria,1RW4Y@1236|Gammaproteobacteria,3NKCM@468|Moraxellaceae	-	-
ATCC_33617	chromosome	chromosome:I	KS03_RS29010	CDS	2343071	2343593	523	hypothetical protein	2	C:GO:0016020; C:GO:0016021	C:membrane; C:integral component of membrane	2DQR5@1|root,3386V@2|Bacteria,1NAZJ@1224|Proteobacteria	-	-
ATCC_33617	chromosome	chromosome:I	KS03_RS23125	CDS	2343674	2344880	1207	hypothetical protein
ATCC_33617	chromosome	chromosome:I	KS03_RS23130	CDS	2345368	2346415	1048	IS481 family transposase	2	P:GO:0015074; F:GO:0003676	P:DNA integration; F:nucleic acid binding	COG2801@1|root,COG2801@2|Bacteria,1MZ45@1224|Proteobacteria,2VNA0@28216|Betaproteobacteria,1K69X@119060|Burkholderiaceae	L	Integrase core domain							PF13683	Integrase core domain
ATCC_33617	chromosome	chromosome:I	KS03_RS23130	CDS	2345368	2346415	1048	IS481 family transposase	2	P:GO:0015074; F:GO:0003676	P:DNA integration; F:nucleic acid binding	COG2801@1|root,COG2801@2|Bacteria,1MZ45@1224|Proteobacteria,2VNA0@28216|Betaproteobacteria,1K69X@119060|Burkholderiaceae	L	Integrase core domain							PF13551	Winged helix-turn helix
ATCC_33617	chromosome	chromosome:I	KS03_RS23135	CDS	2346496	2347522	1027	hypothetical protein
ATCC_33617	chromosome	chromosome:I	KS03_RS23140	CDS	2347521	2347773	253	helix-turn-helix domain-containing protein													PF12728	Helix-turn-helix domain
ATCC_33617	chromosome	chromosome:I	KS03_RS23200	CDS	2358849	2359707	859	site-specific integrase	3	P:GO:0006310; P:GO:0015074; F:GO:0003677	P:DNA recombination; P:DNA integration; F:DNA binding	COG0582@1|root,COG0582@2|Bacteria,1MWBN@1224|Proteobacteria,2VK8Q@28216|Betaproteobacteria,1K61C@119060|Burkholderiaceae	L	Belongs to the 'phage' integrase family							PF00589	Phage integrase family
ATCC_33617	chromosome	chromosome:I	KS03_RS32915	CDS	2359787	2360129	343	phage integrase family protein				COG0582@1|root,COG0582@2|Bacteria,1MWBN@1224|Proteobacteria,1RPD0@1236|Gammaproteobacteria,1Y8AS@135625|Pasteurellales	L	Belongs to the 'phage' integrase family
ATCC_33617	chromosome	chromosome:I	KS03_RS31665	pseudo	2360125	2360441	317
ATCC_33617	chromosome	chromosome:I	KS03_RS23210	CDS	2361064	2361652	589	hypothetical protein				2FEY1@1|root,346WS@2|Bacteria,1P2A2@1224|Proteobacteria,2W406@28216|Betaproteobacteria,1K4S8@119060|Burkholderiaceae	-	-
ATCC_33617	chromosome	chromosome:I	KS03_RS23215	CDS	2361941	2362328	388	helix-turn-helix domain-containing protein	1	F:GO:0003677	F:DNA binding	COG1396@1|root,COG1396@2|Bacteria,1N7DN@1224|Proteobacteria,2WCTC@28216|Betaproteobacteria,1K8EC@119060|Burkholderiaceae	K	Helix-turn-helix domain							PF01381	Helix-turn-helix
ATCC_33617	chromosome	chromosome:I	KS03_RS23220	CDS	2362324	2362582	259	type II toxin-antitoxin system RelE/ParE family toxin				COG2026@1|root,COG2026@2|Bacteria,1NGC6@1224|Proteobacteria,2W8D9@28216|Betaproteobacteria,1KADT@119060|Burkholderiaceae	DJ	ParE toxin of type II toxin-antitoxin system, parDE	K06218	relE, stbE; mRNA interferase RelE/StbE		Prokaryotic defense system	Protein families: signaling and cellular processes	Brite Hierarchies	PF05016	ParE toxin of type II toxin-antitoxin system, parDE
ATCC_33617	chromosome	chromosome:I	KS03_RS31670	pseudo	2362902	2363028	127
ATCC_33617	chromosome	chromosome:I	KS03_RS23225	pseudo	2363032	2363706	675
ATCC_33617	chromosome	chromosome:I	KS03_RS23230	CDS	2363895	2364153	259	hypothetical protein	2	C:GO:0016020; C:GO:0016021	C:membrane; C:integral component of membrane
ATCC_33617	chromosome	chromosome:I	KS03_RS23235	CDS	2364155	2364434	280	hypothetical protein	2	C:GO:0016020; C:GO:0016021	C:membrane; C:integral component of membrane
ATCC_33617	chromosome	chromosome:I	KS03_RS23240	CDS	2364417	2364840	424	glycoside hydrolase family protein	9	P:GO:0008152; P:GO:0009253; P:GO:0016998; P:GO:0019835; P:GO:0042742; F:GO:0003796; F:GO:0003824; F:GO:0016787; F:GO:0016798	P:metabolic process; P:peptidoglycan catabolic process; P:cell wall macromolecule catabolic process; P:cytolysis; P:defense response to bacterium; F:lysozyme activity; F:catalytic activity; F:hydrolase activity; F:hydrolase activity, acting on glycosyl bonds	COG3772@1|root,COG3772@2|Bacteria,1N0ZQ@1224|Proteobacteria,2VVDM@28216|Betaproteobacteria,1K8XQ@119060|Burkholderiaceae	S	lysozyme	K01185	E3.2.1.17; lysozyme	[EC:3.2.1.17]	Enzymes with EC numbers	Unclassified: metabolism	Not Included in Pathway or Brite	PF00959	Phage lysozyme
ATCC_33617	chromosome	chromosome:I	KS03_RS23245	CDS	2364845	2365394	550	lysis system i-spanin subunit Rz	2	P:GO:0019076; P:GO:0019835	P:viral release from host cell; P:cytolysis	2BRZ4@1|root,32KZE@2|Bacteria,1Q9VG@1224|Proteobacteria,2WCZ8@28216|Betaproteobacteria,1K8TZ@119060|Burkholderiaceae	S	Bacteriophage Rz lysis protein	K14744	rzpD; prophage endopeptidase	[EC:3.4.-.-]	Enzymes with EC numbers	Unclassified: metabolism	Not Included in Pathway or Brite	PF03245	Bacteriophage Rz lysis protein
ATCC_33617	chromosome	chromosome:I	KS03_RS30560	pseudo	3073877	3074203	327
ATCC_33617	chromosome	chromosome:I	KS03_RS26305	tRNA	3080159	3080236	78	tRNA-Met
ATCC_33617	chromosome	chromosome:I	KS03_RS26310	CDS	3080316	3080751	436	hypothetical protein
ATCC_33617	chromosome	chromosome:I	KS03_RS31785	CDS	3080747	3081488	742	hypothetical protein	3	P:GO:0006310; P:GO:0015074; F:GO:0003677	P:DNA recombination; P:DNA integration; F:DNA binding
ATCC_33617	chromosome	chromosome:I	KS03_RS26320	CDS	3081506	3081749	244	hypothetical protein
ATCC_33617	chromosome	chromosome:I	KS03_RS31790	CDS	3081907	3082282	376	hypothetical protein
ATCC_33617	chromosome	chromosome:I	KS03_RS30565	CDS	3083292	3083634	343	DUF1493 family protein				COG0236@1|root,COG0236@2|Bacteria	IQ	Carrier of the growing fatty acid chain in fatty acid biosynthesis							PF07377	Protein of unknown function (DUF1493)
ATCC_33617	chromosome	chromosome:I	KS03_RS26325	CDS	3083633	3084065	433	hypothetical protein				2DMCJ@1|root,32JU7@2|Bacteria,1RIPI@1224|Proteobacteria,2WD5T@28216|Betaproteobacteria,1K9FU@119060|Burkholderiaceae	-	-
ATCC_33617	chromosome	chromosome:I	KS03_RS26330	CDS	3084378	3084924	547	NUDIX hydrolase	2	F:GO:0003824; F:GO:0016787	F:catalytic activity; F:hydrolase activity	COG1051@1|root,COG1051@2|Bacteria,1REBW@1224|Proteobacteria,2VQ39@28216|Betaproteobacteria,1K0AH@119060|Burkholderiaceae	F	Belongs to the Nudix hydrolase family							PF14803	Nudix N-terminal
ATCC_33617	chromosome	chromosome:I	KS03_RS26330	CDS	3084378	3084924	547	NUDIX hydrolase	2	F:GO:0003824; F:GO:0016787	F:catalytic activity; F:hydrolase activity	COG1051@1|root,COG1051@2|Bacteria,1REBW@1224|Proteobacteria,2VQ39@28216|Betaproteobacteria,1K0AH@119060|Burkholderiaceae	F	Belongs to the Nudix hydrolase family							PF00293	NUDIX domain
ATCC_33617	chromosome	chromosome:I	KS03_RS26335	CDS	3084938	3085682	745	leucyl/phenylalanyl-tRNA--protein transferase	5	P:GO:0030163; F:GO:0008914; F:GO:0016740; F:GO:0016746; C:GO:0005737	P:protein catabolic process; F:leucyltransferase activity; F:transferase activity; F:acyltransferase activity; C:cytoplasm	COG2360@1|root,COG2360@2|Bacteria,1R9W8@1224|Proteobacteria,2VIUV@28216|Betaproteobacteria,1K04E@119060|Burkholderiaceae	O	Functions in the N-end rule pathway of protein degradation where it conjugates Leu, Phe and, less efficiently, Met from aminoacyl-tRNAs to the N-termini of proteins containing an N-terminal arginine or lysine	K00684	aat; leucyl/phenylalanyl-tRNA---protein transferase	[EC:2.3.2.6]	Enzymes with EC numbers	Unclassified: metabolism	Not Included in Pathway or Brite	PF03588	Leucyl/phenylalanyl-tRNA protein transferase
ATCC_33617	chromosome	chromosome:I	KS03_RS31810	CDS	3164723	3165671	949	hypothetical protein
ATCC_33617	chromosome	chromosome:I	KS03_RS26695	CDS	3166165	3166633	469	hypothetical protein				2AQ3A@1|root,31F8J@2|Bacteria,1QCNX@1224|Proteobacteria,2WE0I@28216|Betaproteobacteria,1KBCZ@119060|Burkholderiaceae	-	-
ATCC_33617	chromosome	chromosome:I	KS03_RS26700	CDS	3166662	3167454	793	DNA adenine methylase	5	P:GO:0032259; P:GO:0032775; F:GO:0008168; F:GO:0009007; F:GO:0016740	P:methylation; P:DNA methylation on adenine; F:methyltransferase activity; F:site-specific DNA-methyltransferase (adenine-specific) activity; F:transferase activity	COG0338@1|root,COG0338@2|Bacteria,1P85S@1224|Proteobacteria,2VKN7@28216|Betaproteobacteria,1K0NA@119060|Burkholderiaceae	L	D12 class N6 adenine-specific DNA methyltransferase	K06223	dam; DNA adenine methylase	[EC:2.1.1.72]	Mismatch repair	Replication and repair	Genetic Information Processing	PF02086	D12 class N6 adenine-specific DNA methyltransferase
ATCC_33617	chromosome	chromosome:I	KS03_RS26700	CDS	3166662	3167454	793	DNA adenine methylase	5	P:GO:0032259; P:GO:0032775; F:GO:0008168; F:GO:0009007; F:GO:0016740	P:methylation; P:DNA methylation on adenine; F:methyltransferase activity; F:site-specific DNA-methyltransferase (adenine-specific) activity; F:transferase activity	COG0338@1|root,COG0338@2|Bacteria,1P85S@1224|Proteobacteria,2VKN7@28216|Betaproteobacteria,1K0NA@119060|Burkholderiaceae	L	D12 class N6 adenine-specific DNA methyltransferase	K06223	dam; DNA adenine methylase	[EC:2.1.1.72]	DNA replication proteins	Protein families: genetic information processing	Brite Hierarchies	PF02086	D12 class N6 adenine-specific DNA methyltransferase
ATCC_33617	chromosome	chromosome:I	KS03_RS26700	CDS	3166662	3167454	793	DNA adenine methylase	5	P:GO:0032259; P:GO:0032775; F:GO:0008168; F:GO:0009007; F:GO:0016740	P:methylation; P:DNA methylation on adenine; F:methyltransferase activity; F:site-specific DNA-methyltransferase (adenine-specific) activity; F:transferase activity	COG0338@1|root,COG0338@2|Bacteria,1P85S@1224|Proteobacteria,2VKN7@28216|Betaproteobacteria,1K0NA@119060|Burkholderiaceae	L	D12 class N6 adenine-specific DNA methyltransferase	K06223	dam; DNA adenine methylase	[EC:2.1.1.72]	DNA repair and recombination proteins	Protein families: genetic information processing	Brite Hierarchies	PF02086	D12 class N6 adenine-specific DNA methyltransferase
ATCC_33617	chromosome	chromosome:I	KS03_RS26700	CDS	3166662	3167454	793	DNA adenine methylase	5	P:GO:0032259; P:GO:0032775; F:GO:0008168; F:GO:0009007; F:GO:0016740	P:methylation; P:DNA methylation on adenine; F:methyltransferase activity; F:site-specific DNA-methyltransferase (adenine-specific) activity; F:transferase activity	COG0338@1|root,COG0338@2|Bacteria,1P85S@1224|Proteobacteria,2VKN7@28216|Betaproteobacteria,1K0NA@119060|Burkholderiaceae	L	D12 class N6 adenine-specific DNA methyltransferase	K06223	dam; DNA adenine methylase	[EC:2.1.1.72]	Prokaryotic defense system	Protein families: signaling and cellular processes	Brite Hierarchies	PF02086	D12 class N6 adenine-specific DNA methyltransferase
ATCC_33617	chromosome	chromosome:I	KS03_RS32990	pseudo	3167896	3168400	505
ATCC_33617	chromosome	chromosome:I	KS03_RS26710	CDS	3168396	3168876	481	hypothetical protein				2AQWV@1|root,31G5D@2|Bacteria,1QAC9@1224|Proteobacteria,2W7AD@28216|Betaproteobacteria,1KE6W@119060|Burkholderiaceae	-	-
ATCC_33617	chromosome	chromosome:I	KS03_RS26715	CDS	3168949	3169273	325	hypothetical protein
ATCC_33617	chromosome	chromosome:I	KS03_RS26720	CDS	3169334	3169790	457	glucosaminidase domain-containing protein	1	F:GO:0004040	F:amidase activity	COG1705@1|root,COG1705@2|Bacteria,1MX2W@1224|Proteobacteria,2VH35@28216|Betaproteobacteria,1K8J2@119060|Burkholderiaceae	NU	Mannosyl-glycoprotein endo-beta-N-acetylglucosaminidase							PF01832	Mannosyl-glycoprotein endo-beta-N-acetylglucosaminidase
ATCC_33617	chromosome	chromosome:I	KS03_RS26725	CDS	3169792	3170116	325	hypothetical protein	2	C:GO:0016020; C:GO:0016021	C:membrane; C:integral component of membrane	2AQ9F@1|root,31FFB@2|Bacteria,1QA7F@1224|Proteobacteria,2WDVW@28216|Betaproteobacteria,1KB3J@119060|Burkholderiaceae	-	-
ATCC_33617	chromosome	chromosome:I	KS03_RS26730	CDS	3170230	3172201	1972	transporter				2ANS8@1|root,31DS6@2|Bacteria,1Q9WY@1224|Proteobacteria,2W6Y6@28216|Betaproteobacteria,1KD7T@119060|Burkholderiaceae	-	-
ATCC_33617	chromosome	chromosome:I	KS03_RS26735	CDS	3172216	3172444	229	hypothetical protein
ATCC_33617	chromosome	chromosome:I	KS03_RS32995	CDS	3172437	3174078	1642	hypothetical protein				28PW1@1|root,2ZCGG@2|Bacteria,1R4C8@1224|Proteobacteria,2VRHS@28216|Betaproteobacteria,1K8QV@119060|Burkholderiaceae	-	-
ATCC_33617	chromosome	chromosome:I	KS03_RS26745	CDS	3174147	3174894	748	hypothetical protein	2	C:GO:0016020; C:GO:0016021	C:membrane; C:integral component of membrane	28XAN@1|root,2ZJ8N@2|Bacteria,1RAE9@1224|Proteobacteria,2VSKB@28216|Betaproteobacteria,1KA11@119060|Burkholderiaceae	-	-
ATCC_33617	chromosome	chromosome:I	KS03_RS26750	CDS	3174894	3176016	1123	baseplate J/gp47 family protein				COG3299@1|root,COG3299@2|Bacteria,1MXKB@1224|Proteobacteria,2VNZ9@28216|Betaproteobacteria,1K39C@119060|Burkholderiaceae	S	Baseplate J-like protein							PF04865	Baseplate J-like protein
ATCC_33617	chromosome	chromosome:I	KS03_RS26755	CDS	3176016	3176424	409	hypothetical protein				2C2XJ@1|root,32W94@2|Bacteria,1N20H@1224|Proteobacteria,2VUQ5@28216|Betaproteobacteria,1KAT2@119060|Burkholderiaceae	-	-
ATCC_33617	chromosome	chromosome:I	KS03_RS29040	CDS	3176423	3177143	721	phage baseplate assembly protein V				COG3501@1|root,COG3501@2|Bacteria,1N2WW@1224|Proteobacteria,2VVJZ@28216|Betaproteobacteria,1KAAC@119060|Burkholderiaceae	S	Baseplate assembly protein							PF04717	Type VI secretion system/phage-baseplate injector OB domain
ATCC_33617	chromosome	chromosome:I	KS03_RS26765	CDS	3177139	3178258	1120	hypothetical protein				COG3500@1|root,COG3500@2|Bacteria,1R6WJ@1224|Proteobacteria,2VNXA@28216|Betaproteobacteria,1K5SF@119060|Burkholderiaceae	S	Late control gene D protein
ATCC_33617	chromosome	chromosome:I	KS03_RS30580	CDS	3178261	3179227	967	hypothetical protein				COG1652@1|root,COG1652@2|Bacteria,1REA6@1224|Proteobacteria,2VRX2@28216|Betaproteobacteria,1K8FQ@119060|Burkholderiaceae	S	LysM domain
ATCC_33617	chromosome	chromosome:I	KS03_RS26775	CDS	3179228	3181136	1909	hypothetical protein	2	C:GO:0016020; C:GO:0016021	C:membrane; C:integral component of membrane	COG5283@1|root,COG5283@2|Bacteria,1NFKU@1224|Proteobacteria,2VPHV@28216|Betaproteobacteria,1KIM3@119060|Burkholderiaceae	D	Phage tail tape measure protein TP901
ATCC_33617	chromosome	chromosome:I	KS03_RS26780	CDS	3181170	3181422	253	hypothetical protein
ATCC_33617	chromosome	chromosome:I	KS03_RS26785	CDS	3181405	3181888	484	hypothetical protein				COG5005@1|root,COG5005@2|Bacteria,1MZXA@1224|Proteobacteria,2VVK2@28216|Betaproteobacteria,1K9PH@119060|Burkholderiaceae	S	Phage virion morphogenesis
ATCC_33617	chromosome	chromosome:I	KS03_RS26790	CDS	3182054	3182465	412	hypothetical protein				2C2XK@1|root,32ZQV@2|Bacteria,1N85V@1224|Proteobacteria,2VW0J@28216|Betaproteobacteria,1KAIF@119060|Burkholderiaceae	-	-
ATCC_33617	chromosome	chromosome:I	KS03_RS26795	CDS	3182474	3182915	442	hypothetical protein				2C2EC@1|root,32S1H@2|Bacteria,1MZBC@1224|Proteobacteria,2VVF0@28216|Betaproteobacteria,1KAWY@119060|Burkholderiaceae	-	-
ATCC_33617	chromosome	chromosome:I	KS03_RS26800	CDS	3183009	3185010	2002	phage tail sheath protein				COG3497@1|root,COG3497@2|Bacteria,1R3SE@1224|Proteobacteria,2VPMY@28216|Betaproteobacteria,1KAZJ@119060|Burkholderiaceae	S	Phage tail sheath protein subtilisin-like domain
ATCC_33617	chromosome	chromosome:I	KS03_RS26805	CDS	3185071	3185287	217	hypothetical protein
ATCC_33617	chromosome	chromosome:I	KS03_RS26810	CDS	3185295	3186120	826	hypothetical protein				2BV62@1|root,32QJE@2|Bacteria,1RM1Z@1224|Proteobacteria,2VTTH@28216|Betaproteobacteria,1K92M@119060|Burkholderiaceae	-	-
ATCC_33617	chromosome	chromosome:I	KS03_RS26815	CDS	3186138	3186483	346	hypothetical protein				2AT8S@1|root,31IRN@2|Bacteria,1NFN9@1224|Proteobacteria,2W4ZU@28216|Betaproteobacteria	-	-
ATCC_33617	chromosome	chromosome:I	KS03_RS26820	CDS	3186488	3187427	940	hypothetical protein				2BBKR@1|root,3254K@2|Bacteria,1RM2S@1224|Proteobacteria,2W1BU@28216|Betaproteobacteria	-	-
ATCC_33617	chromosome	chromosome:I	KS03_RS26825	CDS	3187428	3187821	394	hypothetical protein
ATCC_33617	chromosome	chromosome:I	KS03_RS26830	CDS	3187817	3188102	286	hypothetical protein				28U80@1|root,2ZGDM@2|Bacteria,1P6HH@1224|Proteobacteria,2W6KN@28216|Betaproteobacteria	-	-
ATCC_33617	chromosome	chromosome:I	KS03_RS26835	CDS	3188183	3189242	1060	hypothetical protein				28JSD@1|root,2Z9HW@2|Bacteria,1R8IY@1224|Proteobacteria,2W0ZG@28216|Betaproteobacteria	-	-
ATCC_33617	chromosome	chromosome:I	KS03_RS26840	CDS	3189291	3190752	1462	hypothetical protein				2DM30@1|root,31HGP@2|Bacteria,1Q8ZC@1224|Proteobacteria,2VZC7@28216|Betaproteobacteria	-	-
ATCC_33617	chromosome	chromosome:I	KS03_RS26845	CDS	3190763	3191018	256	hypothetical protein
ATCC_33617	chromosome	chromosome:I	KS03_RS26850	CDS	3191068	3191278	211	hypothetical protein
ATCC_33617	chromosome	chromosome:I	KS03_RS26855	CDS	3191335	3191644	310	hypothetical protein				28VUG@1|root,2ZHW4@2|Bacteria,1P3ZI@1224|Proteobacteria,2W5TK@28216|Betaproteobacteria	-	-
ATCC_33617	chromosome	chromosome:I	KS03_RS26860	CDS	3191709	3193068	1360	phage portal protein				COG4695@1|root,COG4695@2|Bacteria,1R85T@1224|Proteobacteria	S	Phage portal protein							PF04860	Phage portal protein
ATCC_33617	chromosome	chromosome:I	KS03_RS26865	CDS	3193078	3194638	1561	hypothetical protein				COG0507@1|root,COG5362@1|root,COG0507@2|Bacteria,COG5362@2|Bacteria	L	A helicase nuclease that prepares dsDNA breaks (DSB) for recombinational DNA repair. Binds to DSBs and unwinds DNA via a highly rapid and processive ATP-dependent bidirectional helicase activity. Unwinds dsDNA until it encounters a Chi (crossover hotspot instigator) sequence from the 3' direction. Cuts ssDNA a few nucleotides 3' to the Chi site. The properties and activities of the enzyme are cha…
ATCC_33617	chromosome	chromosome:I	KS03_RS26870	CDS	3194543	3195071	529	hypothetical protein				2DCUJ@1|root,2ZFDX@2|Bacteria	-	-
ATCC_33617	chromosome	chromosome:I	KS03_RS26875	CDS	3195186	3195480	295	hypothetical protein				2EJIA@1|root,33D97@2|Bacteria,1NPIP@1224|Proteobacteria	-	-
ATCC_33617	chromosome	chromosome:I	KS03_RS26880	CDS	3195593	3195866	274	hypothetical protein
ATCC_33617	chromosome	chromosome:I	KS03_RS26885	CDS	3196338	3196638	301	phage capsid protein				295I1@1|root,2ZSVI@2|Bacteria,1P6KJ@1224|Proteobacteria,2W6GM@28216|Betaproteobacteria,1KF2S@119060|Burkholderiaceae	-	-
ATCC_33617	chromosome	chromosome:I	KS03_RS26890	CDS	3196630	3196900	271	hypothetical protein
ATCC_33617	chromosome	chromosome:I	KS03_RS31815	CDS	3197047	3197512	466	hypothetical protein
ATCC_33617	chromosome	chromosome:I	KS03_RS26895	CDS	3197553	3198207	655	hypothetical protein				2FIAZ@1|root,34A3B@2|Bacteria,1P0XR@1224|Proteobacteria,2W3XZ@28216|Betaproteobacteria,1KAIK@119060|Burkholderiaceae	-	-
ATCC_33617	chromosome	chromosome:I	KS03_RS26900	CDS	3198466	3198886	421	hypothetical protein				2DNBC@1|root,32WJP@2|Bacteria,1N2F6@1224|Proteobacteria,2VVCT@28216|Betaproteobacteria,1K9TH@119060|Burkholderiaceae	S	NinB protein
ATCC_33617	chromosome	chromosome:I	KS03_RS26905	CDS	3198882	3199218	337	hypothetical protein				2E7QF@1|root,3325W@2|Bacteria,1NG25@1224|Proteobacteria,2VXH8@28216|Betaproteobacteria,1KAKV@119060|Burkholderiaceae	S	Evidence 4 Homologs of previously reported genes of
ATCC_33617	chromosome	chromosome:I	KS03_RS26910	CDS	3199214	3199505	292	hypothetical protein
ATCC_33617	chromosome	chromosome:I	KS03_RS26915	CDS	3199504	3199873	370	hypothetical protein
ATCC_33617	chromosome	chromosome:I	KS03_RS26920	CDS	3199869	3200409	541	polynucleotidyl transferase	2	F:GO:0003676; F:GO:0016740	F:nucleic acid binding; F:transferase activity	COG0817@1|root,COG0817@2|Bacteria,1RCYK@1224|Proteobacteria,2VHSV@28216|Betaproteobacteria,1K7IT@119060|Burkholderiaceae	L	16.7 kDa protein gp11 SWALL Q9JMN0 (EMBL AB036666) (151 aa) fasta scores E() 1.7e-13, 36.61 id in 142 aa, and to Ralstonia solanacearum bacteriophage-related protein rsc3228 or rs02445 SWALL Q8XUG0 (EMBL AL646074) (154 aa) fasta scores E() 1.1e-21, 46.35 id in 151 aa
ATCC_33617	chromosome	chromosome:I	KS03_RS26925	CDS	3200398	3201793	1396	replicative DNA helicase	11	P:GO:0006260; P:GO:0006269; P:GO:0032508; F:GO:0000166; F:GO:0003677; F:GO:0003678; F:GO:0004386; F:GO:0005524; F:GO:0016787; F:GO:0016887; C:GO:1990077	P:DNA replication; P:DNA replication, synthesis of RNA primer; P:DNA duplex unwinding; F:nucleotide binding; F:DNA binding; F:DNA helicase activity; F:helicase activity; F:ATP binding; F:hydrolase activity; F:ATP hydrolysis activity; C:primosome complex	COG0305@1|root,COG0305@2|Bacteria,1MUG9@1224|Proteobacteria,2VIKN@28216|Betaproteobacteria,1K0U4@119060|Burkholderiaceae	L	it exhibits DNA-dependent ATPase activity and contains distinct active sites for ATP binding, DNA binding, and interaction with DnaC protein, primase, and other prepriming proteins	K02314	dnaB; replicative DNA helicase	[EC:5.6.2.3]	DNA replication	Replication and repair	Genetic Information Processing	PF03796	DnaB-like helicase C terminal domain
ATCC_33617	chromosome	chromosome:I	KS03_RS26925	CDS	3200398	3201793	1396	replicative DNA helicase	11	P:GO:0006260; P:GO:0006269; P:GO:0032508; F:GO:0000166; F:GO:0003677; F:GO:0003678; F:GO:0004386; F:GO:0005524; F:GO:0016787; F:GO:0016887; C:GO:1990077	P:DNA replication; P:DNA replication, synthesis of RNA primer; P:DNA duplex unwinding; F:nucleotide binding; F:DNA binding; F:DNA helicase activity; F:helicase activity; F:ATP binding; F:hydrolase activity; F:ATP hydrolysis activity; C:primosome complex	COG0305@1|root,COG0305@2|Bacteria,1MUG9@1224|Proteobacteria,2VIKN@28216|Betaproteobacteria,1K0U4@119060|Burkholderiaceae	L	it exhibits DNA-dependent ATPase activity and contains distinct active sites for ATP binding, DNA binding, and interaction with DnaC protein, primase, and other prepriming proteins	K02314	dnaB; replicative DNA helicase	[EC:5.6.2.3]	DNA replication	Replication and repair	Genetic Information Processing	PF00772	DnaB-like helicase N terminal domain
ATCC_33617	chromosome	chromosome:I	KS03_RS26925	CDS	3200398	3201793	1396	replicative DNA helicase	11	P:GO:0006260; P:GO:0006269; P:GO:0032508; F:GO:0000166; F:GO:0003677; F:GO:0003678; F:GO:0004386; F:GO:0005524; F:GO:0016787; F:GO:0016887; C:GO:1990077	P:DNA replication; P:DNA replication, synthesis of RNA primer; P:DNA duplex unwinding; F:nucleotide binding; F:DNA binding; F:DNA helicase activity; F:helicase activity; F:ATP binding; F:hydrolase activity; F:ATP hydrolysis activity; C:primosome complex	COG0305@1|root,COG0305@2|Bacteria,1MUG9@1224|Proteobacteria,2VIKN@28216|Betaproteobacteria,1K0U4@119060|Burkholderiaceae	L	it exhibits DNA-dependent ATPase activity and contains distinct active sites for ATP binding, DNA binding, and interaction with DnaC protein, primase, and other prepriming proteins	K02314	dnaB; replicative DNA helicase	[EC:5.6.2.3]	Cell cycle - Caulobacter	Cell growth and death	Cellular Processes	PF03796	DnaB-like helicase C terminal domain
ATCC_33617	chromosome	chromosome:I	KS03_RS26925	CDS	3200398	3201793	1396	replicative DNA helicase	11	P:GO:0006260; P:GO:0006269; P:GO:0032508; F:GO:0000166; F:GO:0003677; F:GO:0003678; F:GO:0004386; F:GO:0005524; F:GO:0016787; F:GO:0016887; C:GO:1990077	P:DNA replication; P:DNA replication, synthesis of RNA primer; P:DNA duplex unwinding; F:nucleotide binding; F:DNA binding; F:DNA helicase activity; F:helicase activity; F:ATP binding; F:hydrolase activity; F:ATP hydrolysis activity; C:primosome complex	COG0305@1|root,COG0305@2|Bacteria,1MUG9@1224|Proteobacteria,2VIKN@28216|Betaproteobacteria,1K0U4@119060|Burkholderiaceae	L	it exhibits DNA-dependent ATPase activity and contains distinct active sites for ATP binding, DNA binding, and interaction with DnaC protein, primase, and other prepriming proteins	K02314	dnaB; replicative DNA helicase	[EC:5.6.2.3]	Cell cycle - Caulobacter	Cell growth and death	Cellular Processes	PF00772	DnaB-like helicase N terminal domain
ATCC_33617	chromosome	chromosome:I	KS03_RS26925	CDS	3200398	3201793	1396	replicative DNA helicase	11	P:GO:0006260; P:GO:0006269; P:GO:0032508; F:GO:0000166; F:GO:0003677; F:GO:0003678; F:GO:0004386; F:GO:0005524; F:GO:0016787; F:GO:0016887; C:GO:1990077	P:DNA replication; P:DNA replication, synthesis of RNA primer; P:DNA duplex unwinding; F:nucleotide binding; F:DNA binding; F:DNA helicase activity; F:helicase activity; F:ATP binding; F:hydrolase activity; F:ATP hydrolysis activity; C:primosome complex	COG0305@1|root,COG0305@2|Bacteria,1MUG9@1224|Proteobacteria,2VIKN@28216|Betaproteobacteria,1K0U4@119060|Burkholderiaceae	L	it exhibits DNA-dependent ATPase activity and contains distinct active sites for ATP binding, DNA binding, and interaction with DnaC protein, primase, and other prepriming proteins	K02314	dnaB; replicative DNA helicase	[EC:5.6.2.3]	DNA replication proteins	Protein families: genetic information processing	Brite Hierarchies	PF03796	DnaB-like helicase C terminal domain
ATCC_33617	chromosome	chromosome:I	KS03_RS26925	CDS	3200398	3201793	1396	replicative DNA helicase	11	P:GO:0006260; P:GO:0006269; P:GO:0032508; F:GO:0000166; F:GO:0003677; F:GO:0003678; F:GO:0004386; F:GO:0005524; F:GO:0016787; F:GO:0016887; C:GO:1990077	P:DNA replication; P:DNA replication, synthesis of RNA primer; P:DNA duplex unwinding; F:nucleotide binding; F:DNA binding; F:DNA helicase activity; F:helicase activity; F:ATP binding; F:hydrolase activity; F:ATP hydrolysis activity; C:primosome complex	COG0305@1|root,COG0305@2|Bacteria,1MUG9@1224|Proteobacteria,2VIKN@28216|Betaproteobacteria,1K0U4@119060|Burkholderiaceae	L	it exhibits DNA-dependent ATPase activity and contains distinct active sites for ATP binding, DNA binding, and interaction with DnaC protein, primase, and other prepriming proteins	K02314	dnaB; replicative DNA helicase	[EC:5.6.2.3]	DNA replication proteins	Protein families: genetic information processing	Brite Hierarchies	PF00772	DnaB-like helicase N terminal domain
ATCC_33617	chromosome	chromosome:I	KS03_RS26930	CDS	3201798	3202596	799	ParB N-terminal domain-containing protein				COG1475@1|root,COG1475@2|Bacteria,1NSCC@1224|Proteobacteria	K	ParB-like nuclease domain	K03497	parB, spo0J; ParB family transcriptional regulator, chromosome partitioning protein		Transcription factors	Protein families: genetic information processing	Brite Hierarchies	PF17762	HTH domain found in ParB protein
ATCC_33617	chromosome	chromosome:I	KS03_RS26930	CDS	3201798	3202596	799	ParB N-terminal domain-containing protein				COG1475@1|root,COG1475@2|Bacteria,1NSCC@1224|Proteobacteria	K	ParB-like nuclease domain	K03497	parB, spo0J; ParB family transcriptional regulator, chromosome partitioning protein		Chromosome and associated proteins	Protein families: genetic information processing	Brite Hierarchies	PF17762	HTH domain found in ParB protein
ATCC_33617	chromosome	chromosome:I	KS03_RS26930	CDS	3201798	3202596	799	ParB N-terminal domain-containing protein				COG1475@1|root,COG1475@2|Bacteria,1NSCC@1224|Proteobacteria	K	ParB-like nuclease domain	K03497	parB, spo0J; ParB family transcriptional regulator, chromosome partitioning protein		Cytoskeleton proteins	Protein families: signaling and cellular processes	Brite Hierarchies	PF17762	HTH domain found in ParB protein
ATCC_33617	chromosome	chromosome:I	KS03_RS26935	CDS	3202618	3203593	976	phosphoadenosine phosphosulfate reductase family protein	1	F:GO:0003824	F:catalytic activity	COG0175@1|root,COG0175@2|Bacteria,1PVZZ@1224|Proteobacteria,2VZAU@28216|Betaproteobacteria,1K3KM@119060|Burkholderiaceae	EH	Phosphoadenosine phosphosulfate reductase family							PF01507	Phosphoadenosine phosphosulfate reductase family
ATCC_33617	chromosome	chromosome:I	KS03_RS26940	CDS	3203589	3204066	478	hypothetical protein				2C5J1@1|root,3067M@2|Bacteria,1N4SF@1224|Proteobacteria,2VWDM@28216|Betaproteobacteria,1K9HT@119060|Burkholderiaceae	-	-
ATCC_33617	chromosome	chromosome:I	KS03_RS26945	CDS	3204062	3205133	1072	hypothetical protein				COG3355@1|root,COG3355@2|Bacteria,1N3ME@1224|Proteobacteria,2W4B4@28216|Betaproteobacteria,1KAF2@119060|Burkholderiaceae	K	ROK family
ATCC_33617	chromosome	chromosome:I	KS03_RS26950	CDS	3205125	3205371	247	hypothetical protein
ATCC_33617	chromosome	chromosome:I	KS03_RS26955	CDS	3205380	3205764	385	hypothetical protein				2C5GJ@1|root,2ZEJ3@2|Bacteria,1P90B@1224|Proteobacteria,2W5VA@28216|Betaproteobacteria,1KES7@119060|Burkholderiaceae	-	-
ATCC_33617	chromosome	chromosome:I	KS03_RS26960	CDS	3206561	3206798	238	helix-turn-helix domain-containing protein	1	F:GO:0003677	F:DNA binding				K07729	K07729; putative transcriptional regulator		Transcription factors	Protein families: genetic information processing	Brite Hierarchies	PF01381	Helix-turn-helix
ATCC_33617	chromosome	chromosome:I	KS03_RS29045	CDS	3206890	3207322	433	hypothetical protein	1	F:GO:0003677	F:DNA binding
ATCC_33617	chromosome	chromosome:I	KS03_RS26970	CDS	3207730	3208270	541	zinc ribbon domain-containing protein	2	C:GO:0016020; C:GO:0016021	C:membrane; C:integral component of membrane	2DGA3@1|root,32U6X@2|Bacteria,1N1ID@1224|Proteobacteria,2W2GF@28216|Betaproteobacteria,1K8MJ@119060|Burkholderiaceae	-	-
ATCC_33617	chromosome	chromosome:I	KS03_RS26975	CDS	3208996	3209311	316	hypothetical protein
ATCC_33617	chromosome	chromosome:I	KS03_RS26980	CDS	3209572	3209821	250	hypothetical protein
ATCC_33617	chromosome	chromosome:I	KS03_RS26985	CDS	3209905	3210208	304	KTSC domain-containing protein				2EC8R@1|root,33676@2|Bacteria,1N7SE@1224|Proteobacteria,2VX98@28216|Betaproteobacteria,1KA32@119060|Burkholderiaceae	S	KTSC domain							PF13619	KTSC domain
ATCC_33617	chromosome	chromosome:I	KS03_RS26990	CDS	3210585	3210885	301	hypothetical protein				28SBD@1|root,2ZENC@2|Bacteria,1P6P0@1224|Proteobacteria,2W5Z0@28216|Betaproteobacteria,1KEZS@119060|Burkholderiaceae	-	-
ATCC_33617	chromosome	chromosome:I	KS03_RS32120	CDS	3210881	3211055	175	hypothetical protein
ATCC_33617	chromosome	chromosome:I	KS03_RS26995	CDS	3211056	3211341	286	hypothetical protein				2C2XM@1|root,2ZKBG@2|Bacteria,1P9D3@1224|Proteobacteria,2W6BU@28216|Betaproteobacteria	-	-
ATCC_33617	chromosome	chromosome:I	KS03_RS32125	CDS	3211340	3211496	157	hypothetical protein
ATCC_33617	chromosome	chromosome:I	KS03_RS27000	CDS	3211513	3212416	904	ERF family protein				2C2XN@1|root,32GT6@2|Bacteria,1REZE@1224|Proteobacteria,2VQSN@28216|Betaproteobacteria,1K964@119060|Burkholderiaceae	S	PFAM ERF family protein							PF04404	ERF superfamily
ATCC_33617	chromosome	chromosome:I	KS03_RS27005	CDS	3212408	3214043	1636	YqaJ viral recombinase family protein	2	P:GO:0090305; F:GO:0004519	P:nucleic acid phosphodiester bond hydrolysis; F:endonuclease activity	COG3206@1|root,COG3206@2|Bacteria,1QA2F@1224|Proteobacteria,2VPIJ@28216|Betaproteobacteria,1K482@119060|Burkholderiaceae	L	YqaJ-like viral recombinase domain							PF09588	YqaJ-like viral recombinase domain
ATCC_33617	chromosome	chromosome:I	KS03_RS27010	CDS	3214079	3214724	646	hypothetical protein				2DS0W@1|root,33E04@2|Bacteria,1NJF1@1224|Proteobacteria,2VYX0@28216|Betaproteobacteria,1K9X2@119060|Burkholderiaceae	-	-
ATCC_33617	chromosome	chromosome:I	KS03_RS27015	CDS	3214823	3215489	667	hypothetical protein	2	F:GO:0016740; F:GO:0016757	F:transferase activity; F:glycosyltransferase activity	2DU02@1|root,33ND5@2|Bacteria,1NNSN@1224|Proteobacteria,2VXUV@28216|Betaproteobacteria,1K8VB@119060|Burkholderiaceae	-	-
ATCC_33617	chromosome	chromosome:I	KS03_RS27020	CDS	3215485	3215953	469	zinc-finger-containing protein				2C7AV@1|root,32S15@2|Bacteria,1N7H7@1224|Proteobacteria,2VXVK@28216|Betaproteobacteria,1K9GW@119060|Burkholderiaceae	S	zinc-finger-containing domain							PF11672	zinc-finger-containing domain
ATCC_33617	chromosome	chromosome:I	KS03_RS27025	CDS	3215949	3216144	196	hypothetical protein
ATCC_33617	chromosome	chromosome:I	KS03_RS27030	CDS	3216146	3216557	412	hypothetical protein
ATCC_33617	chromosome	chromosome:I	KS03_RS27035	CDS	3216572	3218483	1912	DNA methyltransferase	3	P:GO:0032259; F:GO:0008168; F:GO:0016740	P:methylation; F:methyltransferase activity; F:transferase activity	COG0270@1|root,COG0270@2|Bacteria,1P5BJ@1224|Proteobacteria,2VK6K@28216|Betaproteobacteria,1K4Q6@119060|Burkholderiaceae	L	PFAM C-5 cytosine-specific DNA methylase
ATCC_33617	chromosome	chromosome:I	KS03_RS27040	CDS	3218496	3218976	481	hypothetical protein				2DVP1@1|root,33WKK@2|Bacteria,1PYIE@1224|Proteobacteria,2W2HR@28216|Betaproteobacteria	-	-
ATCC_33617	chromosome	chromosome:I	KS03_RS33000	CDS	3219077	3220676	1600	hypothetical protein				2A84M@1|root,30X5C@2|Bacteria,1PIZ0@1224|Proteobacteria,2W7IX@28216|Betaproteobacteria,1KEP2@119060|Burkholderiaceae	-	-
ATCC_33617	chromosome	chromosome:I	KS03_RS27050	CDS	3220684	3220942	259	hypothetical protein				2FDCF@1|root,345E9@2|Bacteria,1P1EM@1224|Proteobacteria	-	-
ATCC_33617	chromosome	chromosome:I	KS03_RS27055	CDS	3220951	3221344	394	hypothetical protein				2ENWU@1|root,33GHS@2|Bacteria,1NQ8C@1224|Proteobacteria	-	-
ATCC_33617	chromosome	chromosome:I	KS03_RS27060	CDS	3221441	3221669	229	hypothetical protein
ATCC_33617	chromosome	chromosome:I	KS03_RS27065	CDS	3221704	3222649	946	phage Gp37/Gp68 family protein				COG4422@1|root,COG4422@2|Bacteria,1MXQI@1224|Proteobacteria,2VJP8@28216|Betaproteobacteria,1K05N@119060|Burkholderiaceae	S	PFAM Gp37Gp68 family protein							PF07505	Protein of unknown function (DUF5131)
ATCC_33617	chromosome	chromosome:I	KS03_RS27070	CDS	3222645	3223221	577	hypothetical protein	2	C:GO:0016020; C:GO:0016021	C:membrane; C:integral component of membrane	2A666@1|root,30UYN@2|Bacteria,1PYRF@1224|Proteobacteria,2WDW3@28216|Betaproteobacteria,1KB46@119060|Burkholderiaceae	-	-
ATCC_33617	chromosome	chromosome:I	KS03_RS27075	CDS	3223300	3223858	559	hypothetical protein				2CWYZ@1|root,32T0P@2|Bacteria,1MZEM@1224|Proteobacteria,2VUKY@28216|Betaproteobacteria,1K9ZJ@119060|Burkholderiaceae	-	-
ATCC_33617	chromosome	chromosome:I	KS03_RS27080	CDS	3223854	3224103	250	DUF4224 domain-containing protein				2ANIM@1|root,31DHP@2|Bacteria,1QAT3@1224|Proteobacteria,2W7QB@28216|Betaproteobacteria,1KEYR@119060|Burkholderiaceae	S	Domain of unknown function (DUF4224)							PF13986	Domain of unknown function (DUF4224)
ATCC_33617	chromosome	chromosome:I	KS03_RS28060	CDS	3466001	3466457	457	transposase	3	P:GO:0006313; F:GO:0003677; F:GO:0004803	P:transposition, DNA-mediated; F:DNA binding; F:transposase activity	COG2963@1|root,COG2963@2|Bacteria,1N701@1224|Proteobacteria,2VW15@28216|Betaproteobacteria,1K8VG@119060|Burkholderiaceae	L	Transposase	K07483	K07483; transposase		Replication and repair	Unclassified: genetic information processing	Not Included in Pathway or Brite	PF01527	Transposase
ATCC_33617	chromosome	chromosome:I	KS03_RS28065	CDS	3466512	3467559	1048	IS481 family transposase	2	P:GO:0015074; F:GO:0003676	P:DNA integration; F:nucleic acid binding	COG2801@1|root,COG2801@2|Bacteria,1MZ45@1224|Proteobacteria,2VNA0@28216|Betaproteobacteria,1K69X@119060|Burkholderiaceae	L	Integrase core domain							PF13683	Integrase core domain
ATCC_33617	chromosome	chromosome:I	KS03_RS28065	CDS	3466512	3467559	1048	IS481 family transposase	2	P:GO:0015074; F:GO:0003676	P:DNA integration; F:nucleic acid binding	COG2801@1|root,COG2801@2|Bacteria,1MZ45@1224|Proteobacteria,2VNA0@28216|Betaproteobacteria,1K69X@119060|Burkholderiaceae	L	Integrase core domain							PF13551	Winged helix-turn helix
ATCC_33617	chromosome	chromosome:I	KS03_RS28070	CDS	3467678	3468032	355	IS66 family insertion sequence element accessory protein TnpB				COG3436@1|root,COG3436@2|Bacteria,1N0VT@1224|Proteobacteria,2VU2C@28216|Betaproteobacteria,1K7R8@119060|Burkholderiaceae	L	IS66 Orf2 family protein	K07484	K07484; transposase		Replication and repair	Unclassified: genetic information processing	Not Included in Pathway or Brite	PF05717	IS66 Orf2 like protein
ATCC_33617	chromosome	chromosome:I	KS03_RS28075	CDS	3468131	3469718	1588	IS66 family transposase				COG3316@1|root,COG3316@2|Bacteria,1RHKZ@1224|Proteobacteria,2WGG1@28216|Betaproteobacteria,1K2RM@119060|Burkholderiaceae	L	transposase	K07484	K07484; transposase		Replication and repair	Unclassified: genetic information processing	Not Included in Pathway or Brite	PF03050	Transposase IS66 family
ATCC_33617	chromosome	chromosome:I	KS03_RS28075	CDS	3468131	3469718	1588	IS66 family transposase				COG3316@1|root,COG3316@2|Bacteria,1RHKZ@1224|Proteobacteria,2WGG1@28216|Betaproteobacteria,1K2RM@119060|Burkholderiaceae	L	transposase	K07484	K07484; transposase		Replication and repair	Unclassified: genetic information processing	Not Included in Pathway or Brite	PF13005	zinc-finger binding domain of transposase IS66
ATCC_33617	chromosome	chromosome:I	KS03_RS28075	CDS	3468131	3469718	1588	IS66 family transposase				COG3316@1|root,COG3316@2|Bacteria,1RHKZ@1224|Proteobacteria,2WGG1@28216|Betaproteobacteria,1K2RM@119060|Burkholderiaceae	L	transposase	K07484	K07484; transposase		Replication and repair	Unclassified: genetic information processing	Not Included in Pathway or Brite	PF13817	IS66 C-terminal element
ATCC_33617	chromosome	chromosome:I	KS03_RS28075	CDS	3468131	3469718	1588	IS66 family transposase				COG3316@1|root,COG3316@2|Bacteria,1RHKZ@1224|Proteobacteria,2WGG1@28216|Betaproteobacteria,1K2RM@119060|Burkholderiaceae	L	transposase	K07484	K07484; transposase		Replication and repair	Unclassified: genetic information processing	Not Included in Pathway or Brite	PF13007	Transposase C of IS166 homeodomain
ATCC_33617	chromosome	chromosome:I	KS03_RS28080	CDS	3469698	3471723	2026	AAA family ATPase	4	P:GO:0006313; F:GO:0003677; F:GO:0004803; F:GO:0043565	P:transposition, DNA-mediated; F:DNA binding; F:transposase activity; F:sequence-specific DNA binding										PF08751	TrwC relaxase
ATCC_33617	chromosome	chromosome:I	KS03_RS28080	CDS	3469698	3471723	2026	AAA family ATPase	4	P:GO:0006313; F:GO:0003677; F:GO:0004803; F:GO:0043565	P:transposition, DNA-mediated; F:DNA binding; F:transposase activity; F:sequence-specific DNA binding										PF13604	AAA domain
ATCC_33617	chromosome	chromosome:I	KS03_RS28085	CDS	3471719	3472046	328	hypothetical protein
ATCC_33617	chromosome	chromosome:I	KS03_RS31885	CDS	3472423	3472819	397	hypothetical protein
ATCC_33617	chromosome	chromosome:I	KS03_RS31890	CDS	3472978	3473362	385	hypothetical protein
ATCC_33617	chromosome	chromosome:I	KS03_RS30650	CDS	3473415	3473877	463	ankyrin repeat domain-containing protein				COG0666@1|root,COG0666@2|Bacteria	G	response to abiotic stimulus	K06867	K06867; uncharacterized protein		Function unknown	Poorly characterized	Not Included in Pathway or Brite	PF12796	Ankyrin repeats (3 copies)
ATCC_33617	chromosome	chromosome:I	KS03_RS31895	CDS	3473907	3474603	697	hypothetical protein				2E8SD@1|root,33336@2|Bacteria,1P23J@1224|Proteobacteria,2W40R@28216|Betaproteobacteria,1KB01@119060|Burkholderiaceae	-	-
ATCC_33617	chromosome	chromosome:I	KS03_RS28090	CDS	3474822	3476060	1239	IS3-like element IS1416 family transposase	2	P:GO:0015074; F:GO:0003676	P:DNA integration; F:nucleic acid binding	COG2801@1|root,COG2801@2|Bacteria,1MVXQ@1224|Proteobacteria,2VHER@28216|Betaproteobacteria,1K13F@119060|Burkholderiaceae	L	Integrase core domain	K07497	K07497; putative transposase		Replication and repair	Unclassified: genetic information processing	Not Included in Pathway or Brite	PF13276	HTH-like domain
ATCC_33617	chromosome	chromosome:I	KS03_RS28090	CDS	3474822	3476060	1239	IS3-like element IS1416 family transposase	2	P:GO:0015074; F:GO:0003676	P:DNA integration; F:nucleic acid binding	COG2801@1|root,COG2801@2|Bacteria,1MVXQ@1224|Proteobacteria,2VHER@28216|Betaproteobacteria,1K13F@119060|Burkholderiaceae	L	Integrase core domain	K07497	K07497; putative transposase		Replication and repair	Unclassified: genetic information processing	Not Included in Pathway or Brite	PF13333	Integrase core domain
ATCC_33617	chromosome	chromosome:I	KS03_RS28090	CDS	3474822	3476060	1239	IS3-like element IS1416 family transposase	2	P:GO:0015074; F:GO:0003676	P:DNA integration; F:nucleic acid binding	COG2801@1|root,COG2801@2|Bacteria,1MVXQ@1224|Proteobacteria,2VHER@28216|Betaproteobacteria,1K13F@119060|Burkholderiaceae	L	Integrase core domain	K07497	K07497; putative transposase		Replication and repair	Unclassified: genetic information processing	Not Included in Pathway or Brite	PF01527	Transposase
ATCC_33617	chromosome	chromosome:I	KS03_RS28090	CDS	3474822	3476060	1239	IS3-like element IS1416 family transposase	2	P:GO:0015074; F:GO:0003676	P:DNA integration; F:nucleic acid binding	COG2801@1|root,COG2801@2|Bacteria,1MVXQ@1224|Proteobacteria,2VHER@28216|Betaproteobacteria,1K13F@119060|Burkholderiaceae	L	Integrase core domain	K07497	K07497; putative transposase		Replication and repair	Unclassified: genetic information processing	Not Included in Pathway or Brite	PF00665	Integrase core domain
ATCC_33617	chromosome	chromosome:I	KS03_RS28500	pseudo	3568376	3568712	337
ATCC_33617	chromosome	chromosome:I	KS03_RS28685	CDS	3613825	3614086	262	hypothetical protein
ATCC_33617	chromosome	chromosome:I	KS03_RS28690	CDS	3614190	3615165	976	AraC family transcriptional regulator	4	P:GO:0006355; F:GO:0003677; F:GO:0003700; F:GO:0043565	P:regulation of transcription, DNA-templated; F:DNA binding; F:DNA-binding transcription factor activity; F:sequence-specific DNA binding	COG2207@1|root,COG2207@2|Bacteria,1PF5X@1224|Proteobacteria,2VK8P@28216|Betaproteobacteria,1K3TF@119060|Burkholderiaceae	K	helix-turn-helix- domain containing protein, AraC type	K18991	mtrA; AraC family transcriptional regulator, activator of mtrCDE		Transcription factors	Protein families: genetic information processing	Brite Hierarchies	PF12852	Cupin
ATCC_33617	chromosome	chromosome:I	KS03_RS28690	CDS	3614190	3615165	976	AraC family transcriptional regulator	4	P:GO:0006355; F:GO:0003677; F:GO:0003700; F:GO:0043565	P:regulation of transcription, DNA-templated; F:DNA binding; F:DNA-binding transcription factor activity; F:sequence-specific DNA binding	COG2207@1|root,COG2207@2|Bacteria,1PF5X@1224|Proteobacteria,2VK8P@28216|Betaproteobacteria,1K3TF@119060|Burkholderiaceae	K	helix-turn-helix- domain containing protein, AraC type	K18991	mtrA; AraC family transcriptional regulator, activator of mtrCDE		Transcription factors	Protein families: genetic information processing	Brite Hierarchies	PF12833	Helix-turn-helix domain
ATCC_33617	chromosome	chromosome:I	KS03_RS28695	tRNA	3615580	3615671	92	tRNA-Ser
ATCC_33617	chromosome	chromosome:I	KS03_RS31915	CDS	3616111	3616321	211	hypothetical protein
ATCC_33617	chromosome	chromosome:II	KS03_RS32545	CDS	128678	129221	544	transposase				COG5659@1|root,COG5659@2|Bacteria,1MXSV@1224|Proteobacteria,2VPGV@28216|Betaproteobacteria,1K2CQ@119060|Burkholderiaceae	L	Elements of external origin							PF13546	DDE superfamily endonuclease
ATCC_33617	chromosome	chromosome:II	KS03_RS32555	CDS	177474	177672	199	hypothetical protein
ATCC_33617	chromosome	chromosome:II	KS03_RS29520	CDS	634321	634696	376	DUF5594 family protein				2F4A9@1|root,30WP2@2|Bacteria,1PID3@1224|Proteobacteria,2W712@28216|Betaproteobacteria,1KDGZ@119060|Burkholderiaceae	-	-							PF18057	Domain of unknown function (DUF5594)
ATCC_33617	chromosome	chromosome:II	KS03_RS29525	CDS	635698	636958	1261	hypothetical protein				2BV0W@1|root,32QDG@2|Bacteria,1PK4B@1224|Proteobacteria,2W2N8@28216|Betaproteobacteria,1KDPQ@119060|Burkholderiaceae	-	-
ATCC_33617	chromosome	chromosome:II	KS03_RS30965	CDS	637094	637655	562	hypothetical protein
ATCC_33617	chromosome	chromosome:II	KS03_RS29550	CDS	782043	782544	502	hypothetical protein				COG1917@1|root,COG1917@2|Bacteria,1NTFW@1224|Proteobacteria,2W6PP@28216|Betaproteobacteria,1KC8E@119060|Burkholderiaceae	S	Cupin 2, conserved barrel domain protein
ATCC_33617	chromosome	chromosome:II	KS03_RS29555	pseudo	782669	783361	693
ATCC_33617	chromosome	chromosome:II	KS03_RS29565	CDS	967018	967828	811	immunity 49 family protein				2ECAQ@1|root,33692@2|Bacteria,1NAY7@1224|Proteobacteria,2VYY1@28216|Betaproteobacteria,1K988@119060|Burkholderiaceae	S	Immunity protein 49							PF15575	Immunity protein 49
ATCC_33617	chromosome	chromosome:II	KS03_RS29570	CDS	967898	968081	184	CDI system lipoprotein BcpO													PF12779	WXXGXW repeat (2 copies)
ATCC_33617	chromosome	chromosome:II	KS03_RS05515	CDS	990995	992066	1072	AI-2E family transporter	2	C:GO:0016020; C:GO:0016021	C:membrane; C:integral component of membrane	COG0628@1|root,COG0628@2|Bacteria,1MWKB@1224|Proteobacteria,2VSBS@28216|Betaproteobacteria,1KFYZ@119060|Burkholderiaceae	S	AI-2E family transporter							PF01594	AI-2E family transporter
ATCC_33617	chromosome	chromosome:II	KS03_RS05520	CDS	992214	992571	358	outer membrane protein assembly factor BamE	3	C:GO:0016020; C:GO:0016021; C:GO:0019867	C:membrane; C:integral component of membrane; C:outer membrane	COG2913@1|root,COG2913@2|Bacteria,1RD8V@1224|Proteobacteria,2WCZ9@28216|Betaproteobacteria,1K8U1@119060|Burkholderiaceae	J	activator of ntr-like gene protein	K04064	osmE; osmotically inducible lipoprotein OsmE		Structural proteins	Unclassified: signaling and cellular processes	Not Included in Pathway or Brite	PF04355	SmpA / OmlA family
ATCC_33617	chromosome	chromosome:II	KS03_RS05525	CDS	992713	993508	796	SDR family oxidoreductase	1	F:GO:0016491	F:oxidoreductase activity	COG1028@1|root,COG1028@2|Bacteria,1MUWC@1224|Proteobacteria,2VK5Z@28216|Betaproteobacteria,1K0NP@119060|Burkholderiaceae	IQ	Short-chain dehydrogenase reductase sdr							PF00106	short chain dehydrogenase
ATCC_33617	chromosome	chromosome:II	KS03_RS07720	CDS	1508684	1509047	364	hypothetical protein
ATCC_33617	chromosome	chromosome:II	KS03_RS31105	CDS	1509129	1509507	379	hypothetical protein				COG3209@1|root,COG3209@2|Bacteria	M	self proteolysis
ATCC_33617	chromosome	chromosome:II	KS03_RS07725	CDS	1509503	1509785	283	DUF1778 domain-containing protein	1	P:GO:0006355	P:regulation of transcription, DNA-templated	COG4453@1|root,COG4453@2|Bacteria,1N7K8@1224|Proteobacteria,2VTUT@28216|Betaproteobacteria,1K9UZ@119060|Burkholderiaceae	S	Protein of unknown function (DUF1778)							PF08681	Protein of unknown function (DUF1778)
ATCC_33617	chromosome	chromosome:II	KS03_RS07730	CDS	1509781	1510279	499	GNAT family N-acetyltransferase	2	F:GO:0008080; F:GO:0016740	F:N-acetyltransferase activity; F:transferase activity	COG0454@1|root,COG0454@2|Bacteria,1RHV9@1224|Proteobacteria,2VQ1X@28216|Betaproteobacteria,1K890@119060|Burkholderiaceae	K	Acetyltransferase (GNAT) domain							PF13508	Acetyltransferase (GNAT) domain
ATCC_33617	chromosome	chromosome:II	KS03_RS29700	CDS	1510359	1510857	499	ProQ/FINO family protein				COG3109@1|root,COG3109@2|Bacteria	T	RNA chaperone with significant RNA binding, RNA strand exchange and RNA duplexing activities	K03607	proQ; ProP effector		Signaling proteins	Unclassified: signaling and cellular processes	Not Included in Pathway or Brite	PF04352	ProQ/FINO family
ATCC_33617	chromosome	chromosome:II	KS03_RS31110	pseudo	1511270	1511873	604
ATCC_33617	chromosome	chromosome:II	KS03_RS32700	CDS	1512002	1512254	253	hypothetical protein				COG3209@1|root,COG3209@2|Bacteria,1MVV1@1224|Proteobacteria,2VMJI@28216|Betaproteobacteria,1K0C1@119060|Burkholderiaceae	M	Rhs_assc_core RHS repeat-associated core domain protein
ATCC_33617	chromosome	chromosome:II	KS03_RS31115	CDS	1512270	1512582	313	hypothetical protein
ATCC_33617	chromosome	chromosome:II	KS03_RS29705	CDS	1512547	1513353	807	IS5 family transposase				COG3293@1|root,COG3293@2|Bacteria,1REUV@1224|Proteobacteria,1SD2K@1236|Gammaproteobacteria	L	COG3293 Transposase and inactivated derivatives							PF01609	Transposase DDE domain
ATCC_33617	chromosome	chromosome:II	KS03_RS29705	CDS	1512547	1513353	807	IS5 family transposase				COG3293@1|root,COG3293@2|Bacteria,1REUV@1224|Proteobacteria,1SD2K@1236|Gammaproteobacteria	L	COG3293 Transposase and inactivated derivatives							PF13340	Putative transposase of IS4/5 family (DUF4096)
ATCC_33617	chromosome	chromosome:II	KS03_RS09505	CDS	2045555	2046056	502	alkaline phosphatase D family protein				COG3540@1|root,COG3540@2|Bacteria,1MWAF@1224|Proteobacteria,2VKX4@28216|Betaproteobacteria,1KM77@119065|unclassified Burkholderiales	P	PhoD-like phosphatase, N-terminal domain							PF09423	PhoD-like phosphatase
ATCC_33617	chromosome	chromosome:II	KS03_RS09510	CDS	2046189	2046423	235	hypothetical protein				2EJ1T@1|root,33CSZ@2|Bacteria,1N9U4@1224|Proteobacteria,2W5E7@28216|Betaproteobacteria,1KA7I@119060|Burkholderiaceae	-	-
ATCC_33617	chromosome	chromosome:II	KS03_RS29785	pseudo	2047021	2047516	496
ATCC_33617	chromosome	chromosome:II	KS03_RS09515	CDS	2047539	2048277	739	IS6 family transposase				COG3316@1|root,COG3316@2|Bacteria,1MZ9N@1224|Proteobacteria,2W71I@28216|Betaproteobacteria,1K620@119060|Burkholderiaceae	L	DDE domain	K07498	K07498; putative transposase		Replication and repair	Unclassified: genetic information processing	Not Included in Pathway or Brite	PF13610	DDE domain
ATCC_33617	chromosome	chromosome:II	KS03_RS29790	CDS	2058577	2059383	807	IS5 family transposase				COG3293@1|root,COG3293@2|Bacteria,1REUV@1224|Proteobacteria,1SD2K@1236|Gammaproteobacteria	L	COG3293 Transposase and inactivated derivatives							PF01609	Transposase DDE domain
ATCC_33617	chromosome	chromosome:II	KS03_RS29790	CDS	2058577	2059383	807	IS5 family transposase				COG3293@1|root,COG3293@2|Bacteria,1REUV@1224|Proteobacteria,1SD2K@1236|Gammaproteobacteria	L	COG3293 Transposase and inactivated derivatives							PF13340	Putative transposase of IS4/5 family (DUF4096)
ATCC_33617	chromosome	chromosome:II	KS03_RS10785	CDS	2390566	2391022	457	NUDIX domain-containing protein	2	F:GO:0003824; F:GO:0016787	F:catalytic activity; F:hydrolase activity	COG0494@1|root,COG0494@2|Bacteria,1QU7P@1224|Proteobacteria,2VXUI@28216|Betaproteobacteria,1K7RX@119060|Burkholderiaceae	L	Belongs to the Nudix hydrolase family							PF00293	NUDIX domain
ATCC_33617	chromosome	chromosome:II	KS03_RS10795	pseudo	2391457	2391861	405
ATCC_33617	chromosome	chromosome:II	KS03_RS31255	CDS	2391974	2392844	871	hypothetical protein				COG1562@1|root,COG1562@2|Bacteria	I	ergosterol biosynthetic process							PF18426	Tle cognate immunity protein 4 C-terminal domain
ATCC_33617	chromosome	chromosome:II	KS03_RS31255	CDS	2391974	2392844	871	hypothetical protein				COG1562@1|root,COG1562@2|Bacteria	I	ergosterol biosynthetic process							PF18443	Tle cognate immunity protein 4 N-terminal domain
ATCC_33617	chromosome	chromosome:II	KS03_RS29855	CDS	2392924	2394655	1732	hypothetical protein				COG1075@1|root,COG1075@2|Bacteria,1RAUT@1224|Proteobacteria,2VJQZ@28216|Betaproteobacteria,1K7EM@119060|Burkholderiaceae	S	acetyltransferases and hydrolases with the alpha beta hydrolase fold							PF07819	PGAP1-like protein
ATCC_33617	chromosome	chromosome:II	KS03_RS10805	CDS	2394651	2397330	2680	type VI secretion system tip protein VgrG				COG3501@1|root,COG4253@1|root,COG3501@2|Bacteria,COG4253@2|Bacteria,1MU7Q@1224|Proteobacteria,2VJDF@28216|Betaproteobacteria,1K160@119060|Burkholderiaceae	M	Rhs element Vgr	K11904	vgrG; type VI secretion system secreted protein VgrG		Bacterial secretion system	Membrane transport	Environmental Information Processing	PF05954	Phage tail baseplate hub (GPD)
ATCC_33617	chromosome	chromosome:II	KS03_RS10805	CDS	2394651	2397330	2680	type VI secretion system tip protein VgrG				COG3501@1|root,COG4253@1|root,COG3501@2|Bacteria,COG4253@2|Bacteria,1MU7Q@1224|Proteobacteria,2VJDF@28216|Betaproteobacteria,1K160@119060|Burkholderiaceae	M	Rhs element Vgr	K11904	vgrG; type VI secretion system secreted protein VgrG		Bacterial secretion system	Membrane transport	Environmental Information Processing	PF10106	Uncharacterized protein conserved in bacteria (DUF2345)
ATCC_33617	chromosome	chromosome:II	KS03_RS10805	CDS	2394651	2397330	2680	type VI secretion system tip protein VgrG				COG3501@1|root,COG4253@1|root,COG3501@2|Bacteria,COG4253@2|Bacteria,1MU7Q@1224|Proteobacteria,2VJDF@28216|Betaproteobacteria,1K160@119060|Burkholderiaceae	M	Rhs element Vgr	K11904	vgrG; type VI secretion system secreted protein VgrG		Bacterial secretion system	Membrane transport	Environmental Information Processing	PF04717	Type VI secretion system/phage-baseplate injector OB domain
ATCC_33617	chromosome	chromosome:II	KS03_RS10805	CDS	2394651	2397330	2680	type VI secretion system tip protein VgrG				COG3501@1|root,COG4253@1|root,COG3501@2|Bacteria,COG4253@2|Bacteria,1MU7Q@1224|Proteobacteria,2VJDF@28216|Betaproteobacteria,1K160@119060|Burkholderiaceae	M	Rhs element Vgr	K11904	vgrG; type VI secretion system secreted protein VgrG		Bacterial secretion system	Membrane transport	Environmental Information Processing	PF13296	Putative type VI secretion system Rhs element Vgr
ATCC_33617	chromosome	chromosome:II	KS03_RS10805	CDS	2394651	2397330	2680	type VI secretion system tip protein VgrG				COG3501@1|root,COG4253@1|root,COG3501@2|Bacteria,COG4253@2|Bacteria,1MU7Q@1224|Proteobacteria,2VJDF@28216|Betaproteobacteria,1K160@119060|Burkholderiaceae	M	Rhs element Vgr	K11904	vgrG; type VI secretion system secreted protein VgrG		Secretion system	Protein families: signaling and cellular processes	Brite Hierarchies	PF05954	Phage tail baseplate hub (GPD)
ATCC_33617	chromosome	chromosome:II	KS03_RS10805	CDS	2394651	2397330	2680	type VI secretion system tip protein VgrG				COG3501@1|root,COG4253@1|root,COG3501@2|Bacteria,COG4253@2|Bacteria,1MU7Q@1224|Proteobacteria,2VJDF@28216|Betaproteobacteria,1K160@119060|Burkholderiaceae	M	Rhs element Vgr	K11904	vgrG; type VI secretion system secreted protein VgrG		Secretion system	Protein families: signaling and cellular processes	Brite Hierarchies	PF10106	Uncharacterized protein conserved in bacteria (DUF2345)
ATCC_33617	chromosome	chromosome:II	KS03_RS10805	CDS	2394651	2397330	2680	type VI secretion system tip protein VgrG				COG3501@1|root,COG4253@1|root,COG3501@2|Bacteria,COG4253@2|Bacteria,1MU7Q@1224|Proteobacteria,2VJDF@28216|Betaproteobacteria,1K160@119060|Burkholderiaceae	M	Rhs element Vgr	K11904	vgrG; type VI secretion system secreted protein VgrG		Secretion system	Protein families: signaling and cellular processes	Brite Hierarchies	PF04717	Type VI secretion system/phage-baseplate injector OB domain
ATCC_33617	chromosome	chromosome:II	KS03_RS10805	CDS	2394651	2397330	2680	type VI secretion system tip protein VgrG				COG3501@1|root,COG4253@1|root,COG3501@2|Bacteria,COG4253@2|Bacteria,1MU7Q@1224|Proteobacteria,2VJDF@28216|Betaproteobacteria,1K160@119060|Burkholderiaceae	M	Rhs element Vgr	K11904	vgrG; type VI secretion system secreted protein VgrG		Secretion system	Protein families: signaling and cellular processes	Brite Hierarchies	PF13296	Putative type VI secretion system Rhs element Vgr
ATCC_33617	chromosome	chromosome:II	KS03_RS10810	pseudo	2397669	2397882	214
ATCC_33617	chromosome	chromosome:II	KS03_RS10815	CDS	2397899	2398250	352	hypothetical protein	3	P:GO:0032259; F:GO:0008168; F:GO:0016740	P:methylation; F:methyltransferase activity; F:transferase activity
ATCC_33617	chromosome	chromosome:II	KS03_RS29860	pseudo	2398318	2398635	318
ATCC_33617	chromosome	chromosome:II	KS03_RS10820	CDS	2398677	2399915	1239	IS3-like element IS1416 family transposase	2	P:GO:0015074; F:GO:0003676	P:DNA integration; F:nucleic acid binding	COG2801@1|root,COG2801@2|Bacteria,1MVXQ@1224|Proteobacteria,2VHER@28216|Betaproteobacteria,1K13F@119060|Burkholderiaceae	L	Integrase core domain	K07497	K07497; putative transposase		Replication and repair	Unclassified: genetic information processing	Not Included in Pathway or Brite	PF13276	HTH-like domain
ATCC_33617	chromosome	chromosome:II	KS03_RS10820	CDS	2398677	2399915	1239	IS3-like element IS1416 family transposase	2	P:GO:0015074; F:GO:0003676	P:DNA integration; F:nucleic acid binding	COG2801@1|root,COG2801@2|Bacteria,1MVXQ@1224|Proteobacteria,2VHER@28216|Betaproteobacteria,1K13F@119060|Burkholderiaceae	L	Integrase core domain	K07497	K07497; putative transposase		Replication and repair	Unclassified: genetic information processing	Not Included in Pathway or Brite	PF13333	Integrase core domain
ATCC_33617	chromosome	chromosome:II	KS03_RS10820	CDS	2398677	2399915	1239	IS3-like element IS1416 family transposase	2	P:GO:0015074; F:GO:0003676	P:DNA integration; F:nucleic acid binding	COG2801@1|root,COG2801@2|Bacteria,1MVXQ@1224|Proteobacteria,2VHER@28216|Betaproteobacteria,1K13F@119060|Burkholderiaceae	L	Integrase core domain	K07497	K07497; putative transposase		Replication and repair	Unclassified: genetic information processing	Not Included in Pathway or Brite	PF01527	Transposase
ATCC_33617	chromosome	chromosome:II	KS03_RS10820	CDS	2398677	2399915	1239	IS3-like element IS1416 family transposase	2	P:GO:0015074; F:GO:0003676	P:DNA integration; F:nucleic acid binding	COG2801@1|root,COG2801@2|Bacteria,1MVXQ@1224|Proteobacteria,2VHER@28216|Betaproteobacteria,1K13F@119060|Burkholderiaceae	L	Integrase core domain	K07497	K07497; putative transposase		Replication and repair	Unclassified: genetic information processing	Not Included in Pathway or Brite	PF00665	Integrase core domain
ATCC_33617	chromosome	chromosome:II	KS03_RS10830	pseudo	2399963	2400734	772
ATCC_33617	chromosome	chromosome:II	KS03_RS29865	CDS	2401852	2402098	247	DUF333 domain-containing protein				COG3042@1|root,COG3042@2|Bacteria,1N8JF@1224|Proteobacteria,2VW4V@28216|Betaproteobacteria	S	Domain of unknown function (DUF333)							PF03891	Domain of unknown function (DUF333)
ATCC_33617	chromosome	chromosome:II	KS03_RS32755	CDS	2402179	2402590	412	hypothetical protein	3	P:GO:0006310; P:GO:0015074; F:GO:0003677	P:DNA recombination; P:DNA integration; F:DNA binding
ATCC_33617	plasmid	plasmid:pBIN_1	KS03_RS00790	CDS	19231	20251	1021	IS110 family transposase	3	P:GO:0006313; F:GO:0003677; F:GO:0004803	P:transposition, DNA-mediated; F:DNA binding; F:transposase activity	COG3547@1|root,COG3547@2|Bacteria,1MUER@1224|Proteobacteria,2VJ5H@28216|Betaproteobacteria,1K2CZ@119060|Burkholderiaceae	L	transposase IS116 IS110 IS902 family	K07486	K07486; transposase		Replication and repair	Unclassified: genetic information processing	Not Included in Pathway or Brite	PF02371	Transposase IS116/IS110/IS902 family
ATCC_33617	plasmid	plasmid:pBIN_1	KS03_RS00790	CDS	19231	20251	1021	IS110 family transposase	3	P:GO:0006313; F:GO:0003677; F:GO:0004803	P:transposition, DNA-mediated; F:DNA binding; F:transposase activity	COG3547@1|root,COG3547@2|Bacteria,1MUER@1224|Proteobacteria,2VJ5H@28216|Betaproteobacteria,1K2CZ@119060|Burkholderiaceae	L	transposase IS116 IS110 IS902 family	K07486	K07486; transposase		Replication and repair	Unclassified: genetic information processing	Not Included in Pathway or Brite	PF01548	Transposase
ATCC_33617	plasmid	plasmid:pBIN_1	KS03_RS32210	CDS	20540	20678	139	hypothetical protein
ATCC_33617	plasmid	plasmid:pBIN_1	KS03_RS00795	CDS	20726	22277	1552	IS21 family transposase	2	P:GO:0015074; F:GO:0003676	P:DNA integration; F:nucleic acid binding	COG4584@1|root,COG4584@2|Bacteria,1MU2G@1224|Proteobacteria,2VJIW@28216|Betaproteobacteria,1K2PQ@119060|Burkholderiaceae	L	PFAM Integrase catalytic region							PF00665	Integrase core domain
ATCC_33617	plasmid	plasmid:pBIN_1	KS03_RS00800	CDS	22292	23042	751	IS21-like element ISBmu3 family helper ATPase IstB	1	F:GO:0005524	F:ATP binding	COG1484@1|root,COG1484@2|Bacteria,1MVU2@1224|Proteobacteria,2VMVE@28216|Betaproteobacteria,1K5SK@119060|Burkholderiaceae	L	PFAM IstB domain protein ATP-binding protein							PF01695	IstB-like ATP binding protein
ATCC_33617	plasmid	plasmid:pBIN_1	KS03_RS00805	pseudo	23278	23920	643
ATCC_33617	plasmid	plasmid:pBIN_1	KS03_RS00810	CDS	24326	24782	457	transposase	3	P:GO:0006313; F:GO:0003677; F:GO:0004803	P:transposition, DNA-mediated; F:DNA binding; F:transposase activity	COG2963@1|root,COG2963@2|Bacteria,1N701@1224|Proteobacteria,2VW15@28216|Betaproteobacteria,1K8VG@119060|Burkholderiaceae	L	Transposase	K07483	K07483; transposase		Replication and repair	Unclassified: genetic information processing	Not Included in Pathway or Brite	PF01527	Transposase
ATCC_33617	plasmid	plasmid:pBIN_1	KS03_RS00815	CDS	24781	25135	355	IS66 family insertion sequence element accessory protein TnpB				COG3436@1|root,COG3436@2|Bacteria,1N0VT@1224|Proteobacteria,2VU2C@28216|Betaproteobacteria,1K7R8@119060|Burkholderiaceae	L	IS66 Orf2 family protein	K07484	K07484; transposase		Replication and repair	Unclassified: genetic information processing	Not Included in Pathway or Brite	PF05717	IS66 Orf2 like protein
ATCC_33617	plasmid	plasmid:pBIN_1	KS03_RS00820	CDS	25234	26821	1588	IS66 family transposase				COG3316@1|root,COG3316@2|Bacteria,1RHKZ@1224|Proteobacteria,2WGG1@28216|Betaproteobacteria,1K2RM@119060|Burkholderiaceae	L	transposase	K07484	K07484; transposase		Replication and repair	Unclassified: genetic information processing	Not Included in Pathway or Brite	PF03050	Transposase IS66 family
ATCC_33617	plasmid	plasmid:pBIN_1	KS03_RS00820	CDS	25234	26821	1588	IS66 family transposase				COG3316@1|root,COG3316@2|Bacteria,1RHKZ@1224|Proteobacteria,2WGG1@28216|Betaproteobacteria,1K2RM@119060|Burkholderiaceae	L	transposase	K07484	K07484; transposase		Replication and repair	Unclassified: genetic information processing	Not Included in Pathway or Brite	PF13005	zinc-finger binding domain of transposase IS66
ATCC_33617	plasmid	plasmid:pBIN_1	KS03_RS00820	CDS	25234	26821	1588	IS66 family transposase				COG3316@1|root,COG3316@2|Bacteria,1RHKZ@1224|Proteobacteria,2WGG1@28216|Betaproteobacteria,1K2RM@119060|Burkholderiaceae	L	transposase	K07484	K07484; transposase		Replication and repair	Unclassified: genetic information processing	Not Included in Pathway or Brite	PF13817	IS66 C-terminal element
ATCC_33617	plasmid	plasmid:pBIN_1	KS03_RS00820	CDS	25234	26821	1588	IS66 family transposase				COG3316@1|root,COG3316@2|Bacteria,1RHKZ@1224|Proteobacteria,2WGG1@28216|Betaproteobacteria,1K2RM@119060|Burkholderiaceae	L	transposase	K07484	K07484; transposase		Replication and repair	Unclassified: genetic information processing	Not Included in Pathway or Brite	PF13007	Transposase C of IS166 homeodomain
ATCC_33617	plasmid	plasmid:pBIN_1	KS03_RS31935	CDS	27438	27615	178	hypothetical protein
ATCC_33617	plasmid	plasmid:pBIN_1	KS03_RS00830	CDS	27623	32105	4483	AAA family ATPase				COG1484@1|root,COG1484@2|Bacteria,1QWEV@1224|Proteobacteria	L	DNA-dependent DNA replication
ATCC_33617	plasmid	plasmid:pBIN_1	KS03_RS00835	CDS	32415	32883	469	hypothetical protein
ATCC_33617	plasmid	plasmid:pBIN_1	KS03_RS00840	CDS	33000	33960	961	DUF4268 domain-containing protein	3	P:GO:0090305; F:GO:0003676; F:GO:0004518	P:nucleic acid phosphodiester bond hydrolysis; F:nucleic acid binding; F:nuclease activity	COG1637@1|root,COG1637@2|Bacteria,1QEKG@1224|Proteobacteria,2W8T9@28216|Betaproteobacteria,1KE78@119060|Burkholderiaceae	L	Domain of unknown function (DUF4268)							PF14088	Domain of unknown function (DUF4268)
ATCC_33617	plasmid	plasmid:pBIN_1	KS03_RS32140	CDS	34117	34345	229	hypothetical protein	3	P:GO:0006310; P:GO:0015074; F:GO:0003677	P:DNA recombination; P:DNA integration; F:DNA binding
ATCC_33617	plasmid	plasmid:pBIN_1	KS03_RS32535	pseudo	34428	34946	519
ATCC_33617	plasmid	plasmid:pBIN_1	KS03_RS30750	CDS	35073	36378	1306	hypothetical protein
ATCC_33617	plasmid	plasmid:pBIN_1	KS03_RS00865	CDS	36380	37238	859	hypothetical protein
ATCC_33617	plasmid	plasmid:pBIN_1	KS03_RS00870	CDS	37829	38165	337	hypothetical protein				COG0419@1|root,COG0419@2|Bacteria,1R8F1@1224|Proteobacteria,2W3G6@28216|Betaproteobacteria,1K9W3@119060|Burkholderiaceae	L	ATPase involved in DNA repair
ATCC_33617	plasmid	plasmid:pBIN_1	KS03_RS00875	CDS	38461	39481	1021	IS110 family transposase	3	P:GO:0006313; F:GO:0003677; F:GO:0004803	P:transposition, DNA-mediated; F:DNA binding; F:transposase activity	COG3547@1|root,COG3547@2|Bacteria,1MUER@1224|Proteobacteria,2VJ5H@28216|Betaproteobacteria,1K2CZ@119060|Burkholderiaceae	L	transposase IS116 IS110 IS902 family	K07486	K07486; transposase		Replication and repair	Unclassified: genetic information processing	Not Included in Pathway or Brite	PF02371	Transposase IS116/IS110/IS902 family
ATCC_33617	plasmid	plasmid:pBIN_1	KS03_RS00875	CDS	38461	39481	1021	IS110 family transposase	3	P:GO:0006313; F:GO:0003677; F:GO:0004803	P:transposition, DNA-mediated; F:DNA binding; F:transposase activity	COG3547@1|root,COG3547@2|Bacteria,1MUER@1224|Proteobacteria,2VJ5H@28216|Betaproteobacteria,1K2CZ@119060|Burkholderiaceae	L	transposase IS116 IS110 IS902 family	K07486	K07486; transposase		Replication and repair	Unclassified: genetic information processing	Not Included in Pathway or Brite	PF01548	Transposase
ATCC_33617	plasmid	plasmid:pBIN_1	KS03_RS29235	CDS	39605	40423	819	IS5 family transposase	3	P:GO:0006313; F:GO:0003677; F:GO:0004803	P:transposition, DNA-mediated; F:DNA binding; F:transposase activity	COG3293@1|root,COG3293@2|Bacteria,1REUV@1224|Proteobacteria,2VREC@28216|Betaproteobacteria,1K6P0@119060|Burkholderiaceae	L	transposase							PF13340	Putative transposase of IS4/5 family (DUF4096)
ATCC_33617	plasmid	plasmid:pBIN_1	KS03_RS29235	CDS	39605	40423	819	IS5 family transposase	3	P:GO:0006313; F:GO:0003677; F:GO:0004803	P:transposition, DNA-mediated; F:DNA binding; F:transposase activity	COG3293@1|root,COG3293@2|Bacteria,1REUV@1224|Proteobacteria,2VREC@28216|Betaproteobacteria,1K6P0@119060|Burkholderiaceae	L	transposase							PF01609	Transposase DDE domain
ATCC_33617	plasmid	plasmid:pBIN_1	KS03_RS00880	CDS	40454	42068	1615	hypothetical protein				COG0419@1|root,COG0419@2|Bacteria,1R8F1@1224|Proteobacteria,2W3G6@28216|Betaproteobacteria,1K9W3@119060|Burkholderiaceae	L	ATPase involved in DNA repair
ATCC_33617	plasmid	plasmid:pBIN_1	KS03_RS00885	CDS	42052	42556	505	hypothetical protein				2CC7P@1|root,32RUZ@2|Bacteria,1REZA@1224|Proteobacteria,2W2FJ@28216|Betaproteobacteria,1K470@119060|Burkholderiaceae	-	-
ATCC_33617	plasmid	plasmid:pBIN_1	KS03_RS00890	CDS	42552	43599	1048	hypothetical protein				28K0U@1|root,2Z9QP@2|Bacteria,1R4IB@1224|Proteobacteria,2W2GK@28216|Betaproteobacteria,1K6V3@119060|Burkholderiaceae	-	-
ATCC_33617	plasmid	plasmid:pBIN_1	KS03_RS00895	CDS	43793	45224	1432	ISKra4-like element ISBugl3 family transposase				COG3464@1|root,COG3464@2|Bacteria,1MX7Z@1224|Proteobacteria,2W2AT@28216|Betaproteobacteria,1KA1J@119060|Burkholderiaceae	L	Transposase
ATCC_33617	plasmid	plasmid:pBIN_1	KS03_RS00900	CDS	45355	47020	1666	site-specific integrase	3	P:GO:0006310; P:GO:0015074; F:GO:0003677	P:DNA recombination; P:DNA integration; F:DNA binding	COG4974@1|root,COG4974@2|Bacteria,1R9GT@1224|Proteobacteria,2VPD2@28216|Betaproteobacteria,1K4HA@119060|Burkholderiaceae	L	Belongs to the 'phage' integrase family							PF00589	Phage integrase family
ATCC_33617	plasmid	plasmid:pBIN_1	KS03_RS00900	CDS	45355	47020	1666	site-specific integrase	3	P:GO:0006310; P:GO:0015074; F:GO:0003677	P:DNA recombination; P:DNA integration; F:DNA binding	COG4974@1|root,COG4974@2|Bacteria,1R9GT@1224|Proteobacteria,2VPD2@28216|Betaproteobacteria,1K4HA@119060|Burkholderiaceae	L	Belongs to the 'phage' integrase family							PF12482	Phage integrase protein
ATCC_33617	plasmid	plasmid:pBIN_1	KS03_RS00905	CDS	47142	48726	1585	methyl-accepting chemotaxis protein	5	P:GO:0006935; P:GO:0007165; F:GO:0004888; C:GO:0016020; C:GO:0016021	P:chemotaxis; P:signal transduction; F:transmembrane signaling receptor activity; C:membrane; C:integral component of membrane	COG0840@1|root,COG0840@2|Bacteria,1MU9B@1224|Proteobacteria,2VMP4@28216|Betaproteobacteria,1K51K@119060|Burkholderiaceae	NT	CHASE3 domain	K03406	mcp; methyl-accepting chemotaxis protein		Two-component system	Signal transduction	Environmental Information Processing	PF00015	Methyl-accepting chemotaxis protein (MCP) signalling domain
ATCC_33617	plasmid	plasmid:pBIN_1	KS03_RS00905	CDS	47142	48726	1585	methyl-accepting chemotaxis protein	5	P:GO:0006935; P:GO:0007165; F:GO:0004888; C:GO:0016020; C:GO:0016021	P:chemotaxis; P:signal transduction; F:transmembrane signaling receptor activity; C:membrane; C:integral component of membrane	COG0840@1|root,COG0840@2|Bacteria,1MU9B@1224|Proteobacteria,2VMP4@28216|Betaproteobacteria,1K51K@119060|Burkholderiaceae	NT	CHASE3 domain	K03406	mcp; methyl-accepting chemotaxis protein		Two-component system	Signal transduction	Environmental Information Processing	PF05227	CHASE3 domain
ATCC_33617	plasmid	plasmid:pBIN_1	KS03_RS00905	CDS	47142	48726	1585	methyl-accepting chemotaxis protein	5	P:GO:0006935; P:GO:0007165; F:GO:0004888; C:GO:0016020; C:GO:0016021	P:chemotaxis; P:signal transduction; F:transmembrane signaling receptor activity; C:membrane; C:integral component of membrane	COG0840@1|root,COG0840@2|Bacteria,1MU9B@1224|Proteobacteria,2VMP4@28216|Betaproteobacteria,1K51K@119060|Burkholderiaceae	NT	CHASE3 domain	K03406	mcp; methyl-accepting chemotaxis protein		Bacterial chemotaxis	Cell motility	Cellular Processes	PF00015	Methyl-accepting chemotaxis protein (MCP) signalling domain
ATCC_33617	plasmid	plasmid:pBIN_1	KS03_RS00905	CDS	47142	48726	1585	methyl-accepting chemotaxis protein	5	P:GO:0006935; P:GO:0007165; F:GO:0004888; C:GO:0016020; C:GO:0016021	P:chemotaxis; P:signal transduction; F:transmembrane signaling receptor activity; C:membrane; C:integral component of membrane	COG0840@1|root,COG0840@2|Bacteria,1MU9B@1224|Proteobacteria,2VMP4@28216|Betaproteobacteria,1K51K@119060|Burkholderiaceae	NT	CHASE3 domain	K03406	mcp; methyl-accepting chemotaxis protein		Bacterial chemotaxis	Cell motility	Cellular Processes	PF05227	CHASE3 domain
ATCC_33617	plasmid	plasmid:pBIN_1	KS03_RS00905	CDS	47142	48726	1585	methyl-accepting chemotaxis protein	5	P:GO:0006935; P:GO:0007165; F:GO:0004888; C:GO:0016020; C:GO:0016021	P:chemotaxis; P:signal transduction; F:transmembrane signaling receptor activity; C:membrane; C:integral component of membrane	COG0840@1|root,COG0840@2|Bacteria,1MU9B@1224|Proteobacteria,2VMP4@28216|Betaproteobacteria,1K51K@119060|Burkholderiaceae	NT	CHASE3 domain	K03406	mcp; methyl-accepting chemotaxis protein		Bacterial motility proteins	Protein families: signaling and cellular processes	Brite Hierarchies	PF00015	Methyl-accepting chemotaxis protein (MCP) signalling domain
ATCC_33617	plasmid	plasmid:pBIN_1	KS03_RS00905	CDS	47142	48726	1585	methyl-accepting chemotaxis protein	5	P:GO:0006935; P:GO:0007165; F:GO:0004888; C:GO:0016020; C:GO:0016021	P:chemotaxis; P:signal transduction; F:transmembrane signaling receptor activity; C:membrane; C:integral component of membrane	COG0840@1|root,COG0840@2|Bacteria,1MU9B@1224|Proteobacteria,2VMP4@28216|Betaproteobacteria,1K51K@119060|Burkholderiaceae	NT	CHASE3 domain	K03406	mcp; methyl-accepting chemotaxis protein		Bacterial motility proteins	Protein families: signaling and cellular processes	Brite Hierarchies	PF05227	CHASE3 domain
ATCC_33617	plasmid	plasmid:pBIN_1	KS03_RS32390	CDS	49208	49553	346	hypothetical protein	3	P:GO:0006310; P:GO:0015074; F:GO:0003677	P:DNA recombination; P:DNA integration; F:DNA binding
ATCC_33617	plasmid	plasmid:pBIN_1	KS03_RS00915	CDS	49592	51290	1699	methyl-accepting chemotaxis protein	5	P:GO:0006935; P:GO:0007165; F:GO:0004888; C:GO:0016020; C:GO:0016021	P:chemotaxis; P:signal transduction; F:transmembrane signaling receptor activity; C:membrane; C:integral component of membrane	COG0840@1|root,COG0840@2|Bacteria,1MU9B@1224|Proteobacteria,2VGZ8@28216|Betaproteobacteria,1K1BU@119060|Burkholderiaceae	NT	Chemotaxis sensory transducer	K03406	mcp; methyl-accepting chemotaxis protein		Two-component system	Signal transduction	Environmental Information Processing	PF12729	Four helix bundle sensory module for signal transduction
ATCC_33617	plasmid	plasmid:pBIN_1	KS03_RS00915	CDS	49592	51290	1699	methyl-accepting chemotaxis protein	5	P:GO:0006935; P:GO:0007165; F:GO:0004888; C:GO:0016020; C:GO:0016021	P:chemotaxis; P:signal transduction; F:transmembrane signaling receptor activity; C:membrane; C:integral component of membrane	COG0840@1|root,COG0840@2|Bacteria,1MU9B@1224|Proteobacteria,2VGZ8@28216|Betaproteobacteria,1K1BU@119060|Burkholderiaceae	NT	Chemotaxis sensory transducer	K03406	mcp; methyl-accepting chemotaxis protein		Two-component system	Signal transduction	Environmental Information Processing	PF00015	Methyl-accepting chemotaxis protein (MCP) signalling domain
ATCC_33617	plasmid	plasmid:pBIN_1	KS03_RS00915	CDS	49592	51290	1699	methyl-accepting chemotaxis protein	5	P:GO:0006935; P:GO:0007165; F:GO:0004888; C:GO:0016020; C:GO:0016021	P:chemotaxis; P:signal transduction; F:transmembrane signaling receptor activity; C:membrane; C:integral component of membrane	COG0840@1|root,COG0840@2|Bacteria,1MU9B@1224|Proteobacteria,2VGZ8@28216|Betaproteobacteria,1K1BU@119060|Burkholderiaceae	NT	Chemotaxis sensory transducer	K03406	mcp; methyl-accepting chemotaxis protein		Bacterial chemotaxis	Cell motility	Cellular Processes	PF12729	Four helix bundle sensory module for signal transduction
ATCC_33617	plasmid	plasmid:pBIN_1	KS03_RS00915	CDS	49592	51290	1699	methyl-accepting chemotaxis protein	5	P:GO:0006935; P:GO:0007165; F:GO:0004888; C:GO:0016020; C:GO:0016021	P:chemotaxis; P:signal transduction; F:transmembrane signaling receptor activity; C:membrane; C:integral component of membrane	COG0840@1|root,COG0840@2|Bacteria,1MU9B@1224|Proteobacteria,2VGZ8@28216|Betaproteobacteria,1K1BU@119060|Burkholderiaceae	NT	Chemotaxis sensory transducer	K03406	mcp; methyl-accepting chemotaxis protein		Bacterial chemotaxis	Cell motility	Cellular Processes	PF00015	Methyl-accepting chemotaxis protein (MCP) signalling domain
ATCC_33617	plasmid	plasmid:pBIN_1	KS03_RS00915	CDS	49592	51290	1699	methyl-accepting chemotaxis protein	5	P:GO:0006935; P:GO:0007165; F:GO:0004888; C:GO:0016020; C:GO:0016021	P:chemotaxis; P:signal transduction; F:transmembrane signaling receptor activity; C:membrane; C:integral component of membrane	COG0840@1|root,COG0840@2|Bacteria,1MU9B@1224|Proteobacteria,2VGZ8@28216|Betaproteobacteria,1K1BU@119060|Burkholderiaceae	NT	Chemotaxis sensory transducer	K03406	mcp; methyl-accepting chemotaxis protein		Bacterial motility proteins	Protein families: signaling and cellular processes	Brite Hierarchies	PF12729	Four helix bundle sensory module for signal transduction
ATCC_33617	plasmid	plasmid:pBIN_1	KS03_RS00915	CDS	49592	51290	1699	methyl-accepting chemotaxis protein	5	P:GO:0006935; P:GO:0007165; F:GO:0004888; C:GO:0016020; C:GO:0016021	P:chemotaxis; P:signal transduction; F:transmembrane signaling receptor activity; C:membrane; C:integral component of membrane	COG0840@1|root,COG0840@2|Bacteria,1MU9B@1224|Proteobacteria,2VGZ8@28216|Betaproteobacteria,1K1BU@119060|Burkholderiaceae	NT	Chemotaxis sensory transducer	K03406	mcp; methyl-accepting chemotaxis protein		Bacterial motility proteins	Protein families: signaling and cellular processes	Brite Hierarchies	PF00015	Methyl-accepting chemotaxis protein (MCP) signalling domain
ATCC_33617	plasmid	plasmid:pBIN_1	KS03_RS00920	pseudo	51466	53048	1583
ATCC_33617	plasmid	plasmid:pBIN_1	KS03_RS00925	CDS	53310	54816	1507	IS21 family transposase	5	P:GO:0006310; P:GO:0015074; P:GO:0032196; F:GO:0003676; F:GO:0003677	P:DNA recombination; P:DNA integration; P:transposition; F:nucleic acid binding; F:DNA binding	COG4584@1|root,COG4584@2|Bacteria,1MWIV@1224|Proteobacteria,2VH6U@28216|Betaproteobacteria,1K5SV@119060|Burkholderiaceae	L	Integrase core domain							PF13384	Homeodomain-like domain
ATCC_33617	plasmid	plasmid:pBIN_1	KS03_RS00925	CDS	53310	54816	1507	IS21 family transposase	5	P:GO:0006310; P:GO:0015074; P:GO:0032196; F:GO:0003676; F:GO:0003677	P:DNA recombination; P:DNA integration; P:transposition; F:nucleic acid binding; F:DNA binding	COG4584@1|root,COG4584@2|Bacteria,1MWIV@1224|Proteobacteria,2VH6U@28216|Betaproteobacteria,1K5SV@119060|Burkholderiaceae	L	Integrase core domain							PF00665	Integrase core domain
ATCC_33617	plasmid	plasmid:pBIN_1	KS03_RS00930	CDS	54808	55606	799	IS21-like element helper ATPase IstB	1	F:GO:0005524	F:ATP binding	COG1484@1|root,COG1484@2|Bacteria,1MWQX@1224|Proteobacteria,2VHN6@28216|Betaproteobacteria,1K47T@119060|Burkholderiaceae	L	ATP-binding protein							PF01695	IstB-like ATP binding protein
ATCC_33617	plasmid	plasmid:pBIN_1	KS03_RS29240	CDS	56274	56685	412	manganese catalase family protein				COG3546@1|root,COG3546@2|Bacteria,1MUHB@1224|Proteobacteria,2VNJU@28216|Betaproteobacteria,1K2TT@119060|Burkholderiaceae	P	Pfam Manganese containing catalase	K06334	cotJC; spore coat protein JC		Cell growth	Unclassified: signaling and cellular processes	Not Included in Pathway or Brite	PF05067	Manganese containing catalase				Q8XDQ1	effector (plant avirulence determinant)
ATCC_33617	plasmid	plasmid:pBIN_1	KS03_RS00935	pseudo	56617	56818	202
ATCC_33617	plasmid	plasmid:pBIN_1	KS03_RS00940	CDS	57055	58408	1354	sigma-54 dependent transcriptional regulator	6	P:GO:0000160; P:GO:0006355; F:GO:0000166; F:GO:0003677; F:GO:0005524; F:GO:0043565	P:phosphorelay signal transduction system; P:regulation of transcription, DNA-templated; F:nucleotide binding; F:DNA binding; F:ATP binding; F:sequence-specific DNA binding	COG2204@1|root,COG2204@2|Bacteria,1MU0N@1224|Proteobacteria,2VHSB@28216|Betaproteobacteria,1KCG6@119060|Burkholderiaceae	T	Sigma-54 interaction domain							PF00072	Response regulator receiver domain
ATCC_33617	plasmid	plasmid:pBIN_1	KS03_RS00940	CDS	57055	58408	1354	sigma-54 dependent transcriptional regulator	6	P:GO:0000160; P:GO:0006355; F:GO:0000166; F:GO:0003677; F:GO:0005524; F:GO:0043565	P:phosphorelay signal transduction system; P:regulation of transcription, DNA-templated; F:nucleotide binding; F:DNA binding; F:ATP binding; F:sequence-specific DNA binding	COG2204@1|root,COG2204@2|Bacteria,1MU0N@1224|Proteobacteria,2VHSB@28216|Betaproteobacteria,1KCG6@119060|Burkholderiaceae	T	Sigma-54 interaction domain							PF00158	Sigma-54 interaction domain
ATCC_33617	plasmid	plasmid:pBIN_1	KS03_RS00940	CDS	57055	58408	1354	sigma-54 dependent transcriptional regulator	6	P:GO:0000160; P:GO:0006355; F:GO:0000166; F:GO:0003677; F:GO:0005524; F:GO:0043565	P:phosphorelay signal transduction system; P:regulation of transcription, DNA-templated; F:nucleotide binding; F:DNA binding; F:ATP binding; F:sequence-specific DNA binding	COG2204@1|root,COG2204@2|Bacteria,1MU0N@1224|Proteobacteria,2VHSB@28216|Betaproteobacteria,1KCG6@119060|Burkholderiaceae	T	Sigma-54 interaction domain							PF02954	Bacterial regulatory protein, Fis family
ATCC_33617	plasmid	plasmid:pBIN_1	KS03_RS00945	CDS	58777	59506	730	IS6 family transposase				COG3316@1|root,COG3316@2|Bacteria,1MZ9N@1224|Proteobacteria,2W1KY@28216|Betaproteobacteria,1K182@119060|Burkholderiaceae	L	DDE domain	K07498	K07498; putative transposase		Replication and repair	Unclassified: genetic information processing	Not Included in Pathway or Brite	PF13610	DDE domain
ATCC_33617	plasmid	plasmid:pBIN_1	KS03_RS29245	CDS	59551	60037	487	type II secretion system minor pseudopilin GspI	5	P:GO:0015628; C:GO:0005886; C:GO:0015627; C:GO:0016020; C:GO:0016021	P:protein secretion by the type II secretion system; C:plasma membrane; C:type II protein secretion system complex; C:membrane; C:integral component of membrane	COG2165@1|root,COG2165@2|Bacteria,1N0EN@1224|Proteobacteria	NU	Type II secretion system (T2SS), protein I	K02458	gspI; general secretion pathway protein I		Bacterial secretion system	Membrane transport	Environmental Information Processing	PF02501	Type II secretion system (T2SS), protein I
ATCC_33617	plasmid	plasmid:pBIN_1	KS03_RS29245	CDS	59551	60037	487	type II secretion system minor pseudopilin GspI	5	P:GO:0015628; C:GO:0005886; C:GO:0015627; C:GO:0016020; C:GO:0016021	P:protein secretion by the type II secretion system; C:plasma membrane; C:type II protein secretion system complex; C:membrane; C:integral component of membrane	COG2165@1|root,COG2165@2|Bacteria,1N0EN@1224|Proteobacteria	NU	Type II secretion system (T2SS), protein I	K02458	gspI; general secretion pathway protein I		Bacterial secretion system	Membrane transport	Environmental Information Processing	PF07963	Prokaryotic N-terminal methylation motif
ATCC_33617	plasmid	plasmid:pBIN_1	KS03_RS29245	CDS	59551	60037	487	type II secretion system minor pseudopilin GspI	5	P:GO:0015628; C:GO:0005886; C:GO:0015627; C:GO:0016020; C:GO:0016021	P:protein secretion by the type II secretion system; C:plasma membrane; C:type II protein secretion system complex; C:membrane; C:integral component of membrane	COG2165@1|root,COG2165@2|Bacteria,1N0EN@1224|Proteobacteria	NU	Type II secretion system (T2SS), protein I	K02458	gspI; general secretion pathway protein I		Biofilm formation - Vibrio cholerae	Cellular community - prokaryotes	Cellular Processes	PF02501	Type II secretion system (T2SS), protein I
ATCC_33617	plasmid	plasmid:pBIN_1	KS03_RS29245	CDS	59551	60037	487	type II secretion system minor pseudopilin GspI	5	P:GO:0015628; C:GO:0005886; C:GO:0015627; C:GO:0016020; C:GO:0016021	P:protein secretion by the type II secretion system; C:plasma membrane; C:type II protein secretion system complex; C:membrane; C:integral component of membrane	COG2165@1|root,COG2165@2|Bacteria,1N0EN@1224|Proteobacteria	NU	Type II secretion system (T2SS), protein I	K02458	gspI; general secretion pathway protein I		Biofilm formation - Vibrio cholerae	Cellular community - prokaryotes	Cellular Processes	PF07963	Prokaryotic N-terminal methylation motif
ATCC_33617	plasmid	plasmid:pBIN_1	KS03_RS29245	CDS	59551	60037	487	type II secretion system minor pseudopilin GspI	5	P:GO:0015628; C:GO:0005886; C:GO:0015627; C:GO:0016020; C:GO:0016021	P:protein secretion by the type II secretion system; C:plasma membrane; C:type II protein secretion system complex; C:membrane; C:integral component of membrane	COG2165@1|root,COG2165@2|Bacteria,1N0EN@1224|Proteobacteria	NU	Type II secretion system (T2SS), protein I	K02458	gspI; general secretion pathway protein I		Secretion system	Protein families: signaling and cellular processes	Brite Hierarchies	PF02501	Type II secretion system (T2SS), protein I
ATCC_33617	plasmid	plasmid:pBIN_1	KS03_RS29245	CDS	59551	60037	487	type II secretion system minor pseudopilin GspI	5	P:GO:0015628; C:GO:0005886; C:GO:0015627; C:GO:0016020; C:GO:0016021	P:protein secretion by the type II secretion system; C:plasma membrane; C:type II protein secretion system complex; C:membrane; C:integral component of membrane	COG2165@1|root,COG2165@2|Bacteria,1N0EN@1224|Proteobacteria	NU	Type II secretion system (T2SS), protein I	K02458	gspI; general secretion pathway protein I		Secretion system	Protein families: signaling and cellular processes	Brite Hierarchies	PF07963	Prokaryotic N-terminal methylation motif
ATCC_33617	plasmid	plasmid:pBIN_1	KS03_RS00950	CDS	60146	60824	679	hypothetical protein
ATCC_33617	plasmid	plasmid:pBIN_1	KS03_RS29250	pseudo	61211	62017	807
ATCC_33617	plasmid	plasmid:pBIN_1	KS03_RS00955	CDS	62197	62605	409	hypothetical protein				2A7UF@1|root,30WTN@2|Bacteria,1PII4@1224|Proteobacteria,2W750@28216|Betaproteobacteria,1KDTZ@119060|Burkholderiaceae	-	-
ATCC_33617	plasmid	plasmid:pBIN_1	KS03_RS29255	CDS	62797	63615	819	IS5 family transposase	3	P:GO:0006313; F:GO:0003677; F:GO:0004803	P:transposition, DNA-mediated; F:DNA binding; F:transposase activity	COG3293@1|root,COG3293@2|Bacteria,1REUV@1224|Proteobacteria,2VREC@28216|Betaproteobacteria,1K6P0@119060|Burkholderiaceae	L	transposase							PF01609	Transposase DDE domain
ATCC_33617	plasmid	plasmid:pBIN_1	KS03_RS29255	CDS	62797	63615	819	IS5 family transposase	3	P:GO:0006313; F:GO:0003677; F:GO:0004803	P:transposition, DNA-mediated; F:DNA binding; F:transposase activity	COG3293@1|root,COG3293@2|Bacteria,1REUV@1224|Proteobacteria,2VREC@28216|Betaproteobacteria,1K6P0@119060|Burkholderiaceae	L	transposase							PF13340	Putative transposase of IS4/5 family (DUF4096)
ATCC_33617	plasmid	plasmid:pBIN_1	KS03_RS00960	CDS	63624	65460	1837	site-specific integrase	3	P:GO:0006310; P:GO:0015074; F:GO:0003677	P:DNA recombination; P:DNA integration; F:DNA binding	COG4974@1|root,COG4974@2|Bacteria,1R9GT@1224|Proteobacteria,2VPD2@28216|Betaproteobacteria,1K4HA@119060|Burkholderiaceae	L	Belongs to the 'phage' integrase family	K04763	xerD; integrase/recombinase XerD		Chromosome and associated proteins	Protein families: genetic information processing	Brite Hierarchies	PF12482	Phage integrase protein
ATCC_33617	plasmid	plasmid:pBIN_1	KS03_RS00960	CDS	63624	65460	1837	site-specific integrase	3	P:GO:0006310; P:GO:0015074; F:GO:0003677	P:DNA recombination; P:DNA integration; F:DNA binding	COG4974@1|root,COG4974@2|Bacteria,1R9GT@1224|Proteobacteria,2VPD2@28216|Betaproteobacteria,1K4HA@119060|Burkholderiaceae	L	Belongs to the 'phage' integrase family	K04763	xerD; integrase/recombinase XerD		Chromosome and associated proteins	Protein families: genetic information processing	Brite Hierarchies	PF00589	Phage integrase family
ATCC_33617	plasmid	plasmid:pBIN_1	KS03_RS00965	CDS	65462	65804	343	hypothetical protein				2A7VU@1|root,30WVG@2|Bacteria,1PIKC@1224|Proteobacteria,2W76X@28216|Betaproteobacteria,1KDYZ@119060|Burkholderiaceae	-	-
ATCC_33617	plasmid	plasmid:pBIN_1	KS03_RS00970	CDS	65860	66106	247	hypothetical protein
ATCC_33617	plasmid	plasmid:pBIN_1	KS03_RS30770	CDS	66102	66345	244	hypothetical protein
ATCC_33617	plasmid	plasmid:pBIN_1	KS03_RS00980	CDS	66358	66643	286	hypothetical protein
ATCC_33617	plasmid	plasmid:pBIN_1	KS03_RS00985	CDS	67049	67538	490	GNAT family N-acetyltransferase	2	F:GO:0008080; F:GO:0016740	F:N-acetyltransferase activity; F:transferase activity	COG0454@1|root,COG0456@2|Bacteria,1N009@1224|Proteobacteria,2VQU1@28216|Betaproteobacteria,1K8K9@119060|Burkholderiaceae	K	GCN5-related N-acetyltransferase							PF13673	Acetyltransferase (GNAT) domain
ATCC_33617	plasmid	plasmid:pBIN_1	KS03_RS00990	CDS	67534	67804	271	DUF1778 domain-containing protein	1	P:GO:0006355	P:regulation of transcription, DNA-templated	COG4453@1|root,COG4453@2|Bacteria,1N71W@1224|Proteobacteria,2VU43@28216|Betaproteobacteria,1KAWA@119060|Burkholderiaceae	S	Protein of unknown function (DUF1778)							PF08681	Protein of unknown function (DUF1778)
ATCC_33617	plasmid	plasmid:pBIN_1	KS03_RS00995	CDS	68010	68196	187	hypothetical protein
ATCC_33617	plasmid	plasmid:pBIN_1	KS03_RS30775	CDS	68680	69283	604	hypothetical protein
ATCC_33617	plasmid	plasmid:pBIN_1	KS03_RS01000	CDS	69961	70606	646	AAA family ATPase				COG1192@1|root,COG1192@2|Bacteria,1RACE@1224|Proteobacteria,2VSW2@28216|Betaproteobacteria,1K089@119060|Burkholderiaceae	D	PFAM Cobyrinic acid a,c-diamide synthase							PF13614	AAA domain
ATCC_33617	plasmid	plasmid:pBIN_1	KS03_RS01005	CDS	70608	71646	1039	ParB/RepB/Spo0J family partition protein	1	F:GO:0003677	F:DNA binding	COG1475@1|root,COG1475@2|Bacteria,1MZTS@1224|Proteobacteria,2VUCM@28216|Betaproteobacteria,1K19Q@119060|Burkholderiaceae	K	Belongs to the ParB family							PF02195	ParB-like nuclease domain
ATCC_33617	plasmid	plasmid:pBIN_1	KS03_RS01010	CDS	71730	73035	1306	replication initiation protein	3	P:GO:0006270; P:GO:0071897; F:GO:0003887	P:DNA replication initiation; P:DNA biosynthetic process; F:DNA-directed DNA polymerase activity	COG5527@1|root,COG5527@2|Bacteria,1QBGA@1224|Proteobacteria,2VQRI@28216|Betaproteobacteria,1KFRQ@119060|Burkholderiaceae	L	Initiator Replication protein							PF01051	Initiator Replication protein
ATCC_33617	plasmid	plasmid:pBIN_1	KS03_RS01015	CDS	74563	75463	901	Crp/Fnr family transcriptional regulator				2DCRG@1|root,32U03@2|Bacteria,1MZFR@1224|Proteobacteria,2W6TA@28216|Betaproteobacteria,1KCM4@119060|Burkholderiaceae	-	-
ATCC_33617	plasmid	plasmid:pBIN_1	KS03_RS01020	CDS	75880	77218	1339	DUF1173 domain-containing protein				28KPS@1|root,2ZA7W@2|Bacteria,1QEZJ@1224|Proteobacteria,2VIUG@28216|Betaproteobacteria,1K4JZ@119060|Burkholderiaceae	S	Protein of unknown function (DUF1173)							PF06666	Protein of unknown function (DUF1173)
ATCC_33617	plasmid	plasmid:pBIN_1	KS03_RS01025	CDS	77232	77652	421	hypothetical protein				2ABFV@1|root,310WT@2|Bacteria,1PNY0@1224|Proteobacteria,2W9DZ@28216|Betaproteobacteria,1KEEU@119060|Burkholderiaceae	-	-
ATCC_33617	plasmid	plasmid:pBIN_1	KS03_RS01030	CDS	77648	78302	655	hypothetical protein
ATCC_33617	plasmid	plasmid:pBIN_1	KS03_RS01035	CDS	78318	83034	4717	YadA-like family protein	5	C:GO:0009279; C:GO:0009986; C:GO:0016020; C:GO:0016021; C:GO:0019867	C:cell outer membrane; C:cell surface; C:membrane; C:integral component of membrane; C:outer membrane	COG5295@1|root,COG5295@2|Bacteria,1N338@1224|Proteobacteria,2VT5J@28216|Betaproteobacteria,1K4GT@119060|Burkholderiaceae	UW	Hep_Hag repeat-containing protein	K21449	ata, sadA, emaA; trimeric autotransporter adhesin		Transporters	Protein families: signaling and cellular processes	Brite Hierarchies	PF05662	Coiled stalk of trimeric autotransporter adhesin
ATCC_33617	plasmid	plasmid:pBIN_1	KS03_RS01035	CDS	78318	83034	4717	YadA-like family protein	5	C:GO:0009279; C:GO:0009986; C:GO:0016020; C:GO:0016021; C:GO:0019867	C:cell outer membrane; C:cell surface; C:membrane; C:integral component of membrane; C:outer membrane	COG5295@1|root,COG5295@2|Bacteria,1N338@1224|Proteobacteria,2VT5J@28216|Betaproteobacteria,1K4GT@119060|Burkholderiaceae	UW	Hep_Hag repeat-containing protein	K21449	ata, sadA, emaA; trimeric autotransporter adhesin		Transporters	Protein families: signaling and cellular processes	Brite Hierarchies	PF03895	YadA-like membrane anchor domain
ATCC_33617	plasmid	plasmid:pBIN_1	KS03_RS01035	CDS	78318	83034	4717	YadA-like family protein	5	C:GO:0009279; C:GO:0009986; C:GO:0016020; C:GO:0016021; C:GO:0019867	C:cell outer membrane; C:cell surface; C:membrane; C:integral component of membrane; C:outer membrane	COG5295@1|root,COG5295@2|Bacteria,1N338@1224|Proteobacteria,2VT5J@28216|Betaproteobacteria,1K4GT@119060|Burkholderiaceae	UW	Hep_Hag repeat-containing protein	K21449	ata, sadA, emaA; trimeric autotransporter adhesin		Transporters	Protein families: signaling and cellular processes	Brite Hierarchies	PF05658	Head domain of trimeric autotransporter adhesin
ATCC_33617	plasmid	plasmid:pBIN_1	KS03_RS01040	CDS	83158	83782	625	hypothetical protein				2A83J@1|root,30X45@2|Bacteria,1PIXM@1224|Proteobacteria,2W7H0@28216|Betaproteobacteria,1KEJD@119060|Burkholderiaceae	-	-
ATCC_33617	plasmid	plasmid:pBIN_1	KS03_RS01045	CDS	83778	84096	319	hypothetical protein
ATCC_33617	plasmid	plasmid:pBIN_1	KS03_RS01050	CDS	84092	84536	445	protein-disulfide reductase DsbD N-terminal domain-containing protein	1	F:GO:0047134	F:protein-disulfide reductase (NAD(P)) activity	COG4232@1|root,COG4232@2|Bacteria	CO	protein-disulfide reductase activity							PF11412	Disulphide bond corrector protein DsbC
ATCC_33617	plasmid	plasmid:pBIN_1	KS03_RS01055	CDS	84574	85006	433	hypothetical protein	2	C:GO:0016020; C:GO:0016021	C:membrane; C:integral component of membrane
ATCC_33617	plasmid	plasmid:pBIN_1	KS03_RS01060	CDS	85162	85561	400	outer membrane protein assembly factor BamE	1	C:GO:0019867	C:outer membrane	COG2913@1|root,COG2913@2|Bacteria,1N76Z@1224|Proteobacteria,2W2Y0@28216|Betaproteobacteria,1K8IJ@119060|Burkholderiaceae	J	Part of the outer membrane protein assembly complex, which is involved in assembly and insertion of beta-barrel proteins into the outer membrane							PF04355	SmpA / OmlA family
ATCC_33617	plasmid	plasmid:pBIN_1	KS03_RS01065	CDS	85605	86025	421	hypothetical protein	2	C:GO:0016020; C:GO:0016021	C:membrane; C:integral component of membrane
ATCC_33617	plasmid	plasmid:pBIN_1	KS03_RS01070	CDS	86035	88135	2101	zeta toxin family protein	4	P:GO:0016310; F:GO:0000166; F:GO:0005524; F:GO:0016301	P:phosphorylation; F:nucleotide binding; F:ATP binding; F:kinase activity	COG4185@1|root,COG4185@2|Bacteria,1N201@1224|Proteobacteria,2VVNE@28216|Betaproteobacteria,1K79E@119060|Burkholderiaceae	S	Zeta toxin							PF06414	Zeta toxin
ATCC_33617	plasmid	plasmid:pBIN_1	KS03_RS01075	CDS	88146	88395	250	hypothetical protein
ATCC_33617	plasmid	plasmid:pBIN_1	KS03_RS01080	CDS	88433	89063	631	phospholipase D family protein	4	P:GO:0019637; P:GO:0090305; F:GO:0003824; F:GO:0004519	P:organophosphate metabolic process; P:nucleic acid phosphodiester bond hydrolysis; F:catalytic activity; F:endonuclease activity	COG1502@1|root,COG1502@2|Bacteria,1RG6H@1224|Proteobacteria,2VTMJ@28216|Betaproteobacteria,1K4VP@119060|Burkholderiaceae	I	PLD-like domain							PF13091	PLD-like domain
ATCC_33617	plasmid	plasmid:pBIN_1	KS03_RS01085	CDS	89320	89701	382	hypothetical protein	2	C:GO:0016020; C:GO:0016021	C:membrane; C:integral component of membrane
ATCC_33617	plasmid	plasmid:pBIN_1	KS03_RS01090	CDS	89738	93176	3439	conjugal transfer protein TraG N-terminal domain-containing protein	2	C:GO:0016020; C:GO:0016021	C:membrane; C:integral component of membrane	COG0457@1|root,COG0457@2|Bacteria,1QUD2@1224|Proteobacteria,2WI8Q@28216|Betaproteobacteria,1K0HA@119060|Burkholderiaceae	S	TraG-like protein, N-terminal region	K12056	traG; conjugal transfer mating pair stabilization protein TraG		Secretion system	Protein families: signaling and cellular processes	Brite Hierarchies	PF07916	TraG-like protein, N-terminal region
ATCC_33617	plasmid	plasmid:pBIN_1	KS03_RS01095	CDS	93178	94624	1447	conjugal transfer protein TraH				28MTB@1|root,2ZB1J@2|Bacteria,1MWD0@1224|Proteobacteria,2VQE5@28216|Betaproteobacteria,1K6PW@119060|Burkholderiaceae	S	Conjugative relaxosome accessory transposon protein	K12072	traH; conjugative transfer pilus assembly protein TraH		Secretion system	Protein families: signaling and cellular processes	Brite Hierarchies	PF06122	Conjugative relaxosome accessory transposon protein
ATCC_33617	plasmid	plasmid:pBIN_1	KS03_RS29260	CDS	94620	95664	1045	hypothetical protein
ATCC_33617	plasmid	plasmid:pBIN_1	KS03_RS01105	CDS	95663	96446	784	conjugal transfer protein TraF				COG0526@1|root,COG0526@2|Bacteria,1MXG2@1224|Proteobacteria,2VMSV@28216|Betaproteobacteria,1K53M@119060|Burkholderiaceae	CO	F plasmid transfer operon protein	K12057	traF; conjugal transfer pilus assembly protein TraF		Secretion system	Protein families: signaling and cellular processes	Brite Hierarchies	PF13728	F plasmid transfer operon protein
ATCC_33617	plasmid	plasmid:pBIN_1	KS03_RS01110	CDS	96469	96865	397	hypothetical protein
ATCC_33617	plasmid	plasmid:pBIN_1	KS03_RS01115	CDS	96888	97296	409	hypothetical protein				2BHQ8@1|root,32BTH@2|Bacteria,1PW3X@1224|Proteobacteria,2WAEG@28216|Betaproteobacteria,1KB2E@119060|Burkholderiaceae	-	-
ATCC_33617	plasmid	plasmid:pBIN_1	KS03_RS01120	CDS	97292	98558	1267	conjugal transfer protein TraN				28KC1@1|root,2Z9Z1@2|Bacteria,1MW96@1224|Proteobacteria,2VNCU@28216|Betaproteobacteria,1K50A@119060|Burkholderiaceae	S	Type-1V conjugative transfer system mating pair stabilisation	K12058	traN; conjugal transfer mating pair stabilization protein TraN		Secretion system	Protein families: signaling and cellular processes	Brite Hierarchies	PF06986	Type-1V conjugative transfer system mating pair stabilisation
ATCC_33617	plasmid	plasmid:pBIN_1	KS03_RS01125	CDS	98554	99853	1300	hypothetical protein				2DM0F@1|root,315ZJ@2|Bacteria,1MYSJ@1224|Proteobacteria,2VX1H@28216|Betaproteobacteria,1KBFE@119060|Burkholderiaceae	-	-
ATCC_33617	plasmid	plasmid:pBIN_1	KS03_RS01130	CDS	99852	100644	793	type-F conjugative transfer system pilin assembly protein TrbC				2CIAZ@1|root,2Z7YC@2|Bacteria,1R62Q@1224|Proteobacteria,2VJKP@28216|Betaproteobacteria,1K8R8@119060|Burkholderiaceae	S	Type-F conjugative transfer system pilin assembly protein	K12059	trbC; conjugal transfer pilus assembly protein TrbC		Secretion system	Protein families: signaling and cellular processes	Brite Hierarchies	PF09673	Type-F conjugative transfer system pilin assembly protein
ATCC_33617	plasmid	plasmid:pBIN_1	KS03_RS01135	CDS	100640	101618	979	TraU family protein				28HGF@1|root,2Z7SA@2|Bacteria,1MXUA@1224|Proteobacteria,2VKJA@28216|Betaproteobacteria,1K6KC@119060|Burkholderiaceae	S	TraU protein	K12060	traU; conjugal transfer pilus assembly protein TraU		Secretion system	Protein families: signaling and cellular processes	Brite Hierarchies	PF06834	TraU protein
ATCC_33617	plasmid	plasmid:pBIN_1	KS03_RS01140	CDS	101668	102613	946	hypothetical protein	2	C:GO:0016020; C:GO:0016021	C:membrane; C:integral component of membrane
ATCC_33617	plasmid	plasmid:pBIN_1	KS03_RS01145	CDS	102679	103288	610	type-F conjugative transfer system protein TraW				2CGUX@1|root,31QWG@2|Bacteria,1N1MK@1224|Proteobacteria,2VN6I@28216|Betaproteobacteria,1K93U@119060|Burkholderiaceae	S	TIGRFAM Type-F conjugative transfer system protein TraW	K12061	traW; conjugal transfer pilus assembly protein TraW		Secretion system	Protein families: signaling and cellular processes	Brite Hierarchies	PF12477	Sex factor F TraW protein N terminal
ATCC_33617	plasmid	plasmid:pBIN_1	KS03_RS01150	CDS	103326	103650	325	hypothetical protein	2	C:GO:0016020; C:GO:0016021	C:membrane; C:integral component of membrane
ATCC_33617	plasmid	plasmid:pBIN_1	KS03_RS01155	CDS	103715	104216	502	S26 family signal peptidase	4	P:GO:0006465; P:GO:0006508; F:GO:0004252; F:GO:0008233	P:signal peptide processing; P:proteolysis; F:serine-type endopeptidase activity; F:peptidase activity	COG4959@1|root,COG4959@2|Bacteria,1N8IF@1224|Proteobacteria,2VQEQ@28216|Betaproteobacteria,1K935@119060|Burkholderiaceae	OU	Signal peptidase, peptidase S26	K12062	trbI; conjugal transfer pilin signal peptidase TrbI		Secretion system	Protein families: signaling and cellular processes	Brite Hierarchies	PF10502	Signal peptidase, peptidase S26
ATCC_33617	plasmid	plasmid:pBIN_1	KS03_RS01160	CDS	104212	104584	373	TrbI F-type domain-containing protein				2FCJ6@1|root,344NH@2|Bacteria,1NZRF@1224|Proteobacteria,2W47W@28216|Betaproteobacteria,1KFAU@119060|Burkholderiaceae	-	-
ATCC_33617	plasmid	plasmid:pBIN_1	KS03_RS01165	CDS	104580	107181	2602	type IV secretion system protein TraC				COG3451@1|root,COG3451@2|Bacteria,1MUEN@1224|Proteobacteria,2VHPD@28216|Betaproteobacteria,1K53B@119060|Burkholderiaceae	U	F pilus assembly Type-IV secretion system for plasmid transfer	K12063	traC; conjugal transfer ATP-binding protein TraC		Secretion system	Protein families: signaling and cellular processes	Brite Hierarchies	PF19044	TraG P-loop domain
ATCC_33617	plasmid	plasmid:pBIN_1	KS03_RS01165	CDS	104580	107181	2602	type IV secretion system protein TraC				COG3451@1|root,COG3451@2|Bacteria,1MUEN@1224|Proteobacteria,2VHPD@28216|Betaproteobacteria,1K53B@119060|Burkholderiaceae	U	F pilus assembly Type-IV secretion system for plasmid transfer	K12063	traC; conjugal transfer ATP-binding protein TraC		Secretion system	Protein families: signaling and cellular processes	Brite Hierarchies	PF19357	Family of unknown function (DUF5934)
ATCC_33617	plasmid	plasmid:pBIN_1	KS03_RS01165	CDS	104580	107181	2602	type IV secretion system protein TraC				COG3451@1|root,COG3451@2|Bacteria,1MUEN@1224|Proteobacteria,2VHPD@28216|Betaproteobacteria,1K53B@119060|Burkholderiaceae	U	F pilus assembly Type-IV secretion system for plasmid transfer	K12063	traC; conjugal transfer ATP-binding protein TraC		Secretion system	Protein families: signaling and cellular processes	Brite Hierarchies	PF11130	TraC protein
ATCC_33617	plasmid	plasmid:pBIN_1	KS03_RS01170	CDS	107194	107893	700	type IV conjugative transfer system lipoprotein TraV				28M4U@1|root,2ZAIP@2|Bacteria,1N10S@1224|Proteobacteria,2VRNY@28216|Betaproteobacteria,1KAW1@119060|Burkholderiaceae	S	Type IV conjugative transfer system lipoprotein (TraV)	K12064	traV; conjugal transfer pilus assembly protein TraV		Secretion system	Protein families: signaling and cellular processes	Brite Hierarchies	PF09676	Type IV conjugative transfer system lipoprotein (TraV)
ATCC_33617	plasmid	plasmid:pBIN_1	KS03_RS01175	CDS	107895	108804	910	DsbC family protein	2	F:GO:0016853; C:GO:0042597	F:isomerase activity; C:periplasmic space	COG1651@1|root,COG1651@2|Bacteria,1RD39@1224|Proteobacteria,2VJIB@28216|Betaproteobacteria,1K82K@119060|Burkholderiaceae	O	Required for disulfide bond formation in some periplasmic proteins. Acts by transferring its disulfide bond to other proteins and is reduced in the process	K03981	dsbC; thiol:disulfide interchange protein DsbC	[EC:5.3.4.1]	Chaperones and folding catalysts	Protein families: genetic information processing	Brite Hierarchies	PF13098	Thioredoxin-like domain
ATCC_33617	plasmid	plasmid:pBIN_1	KS03_RS01175	CDS	107895	108804	910	DsbC family protein	2	F:GO:0016853; C:GO:0042597	F:isomerase activity; C:periplasmic space	COG1651@1|root,COG1651@2|Bacteria,1RD39@1224|Proteobacteria,2VJIB@28216|Betaproteobacteria,1K82K@119060|Burkholderiaceae	O	Required for disulfide bond formation in some periplasmic proteins. Acts by transferring its disulfide bond to other proteins and is reduced in the process	K03981	dsbC; thiol:disulfide interchange protein DsbC	[EC:5.3.4.1]	Chaperones and folding catalysts	Protein families: genetic information processing	Brite Hierarchies	PF10411	Disulfide bond isomerase protein N-terminus
ATCC_33617	plasmid	plasmid:pBIN_1	KS03_RS01175	CDS	107895	108804	910	DsbC family protein	2	F:GO:0016853; C:GO:0042597	F:isomerase activity; C:periplasmic space	COG1651@1|root,COG1651@2|Bacteria,1RD39@1224|Proteobacteria,2VJIB@28216|Betaproteobacteria,1K82K@119060|Burkholderiaceae	O	Required for disulfide bond formation in some periplasmic proteins. Acts by transferring its disulfide bond to other proteins and is reduced in the process	K03981	dsbC; thiol:disulfide interchange protein DsbC	[EC:5.3.4.1]	Secretion system	Protein families: signaling and cellular processes	Brite Hierarchies	PF13098	Thioredoxin-like domain
ATCC_33617	plasmid	plasmid:pBIN_1	KS03_RS01175	CDS	107895	108804	910	DsbC family protein	2	F:GO:0016853; C:GO:0042597	F:isomerase activity; C:periplasmic space	COG1651@1|root,COG1651@2|Bacteria,1RD39@1224|Proteobacteria,2VJIB@28216|Betaproteobacteria,1K82K@119060|Burkholderiaceae	O	Required for disulfide bond formation in some periplasmic proteins. Acts by transferring its disulfide bond to other proteins and is reduced in the process	K03981	dsbC; thiol:disulfide interchange protein DsbC	[EC:5.3.4.1]	Secretion system	Protein families: signaling and cellular processes	Brite Hierarchies	PF10411	Disulfide bond isomerase protein N-terminus
ATCC_33617	plasmid	plasmid:pBIN_1	KS03_RS01180	CDS	108811	109768	958	phage Gp37/Gp68 family protein				COG4422@1|root,COG4422@2|Bacteria,1MXQI@1224|Proteobacteria,2VJP8@28216|Betaproteobacteria,4ACKH@80864|Comamonadaceae	S	Gp37Gp68 family							PF07505	Protein of unknown function (DUF5131)
ATCC_33617	plasmid	plasmid:pBIN_1	KS03_RS01185	CDS	109844	110933	1090	hypothetical protein				2EFVP@1|root,339MX@2|Bacteria,1NG8I@1224|Proteobacteria,2W9Z7@28216|Betaproteobacteria,1KA7N@119060|Burkholderiaceae	-	-
ATCC_33617	plasmid	plasmid:pBIN_1	KS03_RS01190	CDS	110925	112263	1339	TraB/VirB10 family protein	2	C:GO:0016020; C:GO:0016021	C:membrane; C:integral component of membrane	COG2433@1|root,COG2433@2|Bacteria,1QUPW@1224|Proteobacteria,2VMWY@28216|Betaproteobacteria,1K79K@119060|Burkholderiaceae	S	Bacterial conjugation TrbI-like protein	K12065	traB; conjugal transfer pilus assembly protein TraB		Secretion system	Protein families: signaling and cellular processes	Brite Hierarchies	PF03743	Bacterial conjugation TrbI-like protein
ATCC_33617	plasmid	plasmid:pBIN_1	KS03_RS01195	CDS	112255	112996	742	type-F conjugative transfer system secretin TraK				28IKN@1|root,2Z8MA@2|Bacteria,1NF1D@1224|Proteobacteria,2W1XY@28216|Betaproteobacteria,1K9U2@119060|Burkholderiaceae	S	TraK protein	K12066	traK; conjugal transfer pilus assembly protein TraK		Secretion system	Protein families: signaling and cellular processes	Brite Hierarchies	PF06586	TraK protein
ATCC_33617	plasmid	plasmid:pBIN_1	KS03_RS01200	CDS	112992	113604	613	type IV conjugative transfer system protein TraE	3	P:GO:0000746; C:GO:0016020; C:GO:0016021	P:conjugation; C:membrane; C:integral component of membrane	2DBUJ@1|root,2ZB5X@2|Bacteria,1P88B@1224|Proteobacteria,2VM6D@28216|Betaproteobacteria,1KATV@119060|Burkholderiaceae	S	TraE protein	K12067	traE; conjugal transfer pilus assembly protein TraE		Secretion system	Protein families: signaling and cellular processes	Brite Hierarchies	PF05309	TraE protein
ATCC_33617	plasmid	plasmid:pBIN_1	KS03_RS01205	CDS	113608	113896	289	type IV conjugative transfer system protein TraL	4	P:GO:0000746; C:GO:0016020; C:GO:0016021; C:GO:0019867	P:conjugation; C:membrane; C:integral component of membrane; C:outer membrane	2EJSV@1|root,32AXA@2|Bacteria,1PXHN@1224|Proteobacteria,2WCXI@28216|Betaproteobacteria,1KBFR@119060|Burkholderiaceae	S	TraL protein	K12068	traL; conjugal transfer pilus assembly protein TraL		Secretion system	Protein families: signaling and cellular processes	Brite Hierarchies	PF07178	TraL protein
ATCC_33617	plasmid	plasmid:pBIN_1	KS03_RS01210	CDS	113905	114295	391	hypothetical protein	2	C:GO:0016020; C:GO:0016021	C:membrane; C:integral component of membrane	2BGNZ@1|root,32AMQ@2|Bacteria,1PYTJ@1224|Proteobacteria,2W3HH@28216|Betaproteobacteria,1KB8T@119060|Burkholderiaceae	-	-	K12069	traA; conjugal transfer pilus assembly protein TraA		Secretion system	Protein families: signaling and cellular processes	Brite Hierarchies
ATCC_33617	plasmid	plasmid:pBIN_1	KS03_RS01215	CDS	114877	115369	493	lytic transglycosylase domain-containing protein				COG0741@1|root,COG0741@2|Bacteria,1MZU4@1224|Proteobacteria,2W2R2@28216|Betaproteobacteria,1K9VX@119060|Burkholderiaceae	M	Transglycosylase SLT domain							PF01464	Transglycosylase SLT domain
ATCC_33617	plasmid	plasmid:pBIN_1	KS03_RS01220	CDS	115839	116886	1048	IS481 family transposase	2	P:GO:0015074; F:GO:0003676	P:DNA integration; F:nucleic acid binding	COG2801@1|root,COG2801@2|Bacteria,1MZ45@1224|Proteobacteria,2VNA0@28216|Betaproteobacteria,1K69X@119060|Burkholderiaceae	L	Integrase core domain							PF13683	Integrase core domain
ATCC_33617	plasmid	plasmid:pBIN_1	KS03_RS01220	CDS	115839	116886	1048	IS481 family transposase	2	P:GO:0015074; F:GO:0003676	P:DNA integration; F:nucleic acid binding	COG2801@1|root,COG2801@2|Bacteria,1MZ45@1224|Proteobacteria,2VNA0@28216|Betaproteobacteria,1K69X@119060|Burkholderiaceae	L	Integrase core domain							PF13551	Winged helix-turn helix
ATCC_33617	plasmid	plasmid:pBIN_1	KS03_RS30780	CDS	117094	117442	349	hypothetical protein
ATCC_33617	plasmid	plasmid:pBIN_1	KS03_RS01225	CDS	117613	118009	397	ester cyclase	1	P:GO:0030638	P:polyketide metabolic process	COG5485@1|root,COG5485@2|Bacteria,1N1VS@1224|Proteobacteria,2UG41@28211|Alphaproteobacteria	S	SnoaL-like polyketide cyclase							PF07366	SnoaL-like polyketide cyclase
ATCC_33617	plasmid	plasmid:pBIN_1	KS03_RS01230	CDS	118165	119464	1300	MFS transporter	6	P:GO:0008643; P:GO:0055085; F:GO:0022857; C:GO:0016020; C:GO:0016021; C:GO:0110165	P:carbohydrate transport; P:transmembrane transport; F:transmembrane transporter activity; C:membrane; C:integral component of membrane; C:cellular anatomical entity	COG0477@1|root,COG2814@2|Bacteria,1MWKH@1224|Proteobacteria,2U0GU@28211|Alphaproteobacteria,1JQZ8@119045|Methylobacteriaceae	EGP	PFAM General substrate transporter							PF07690	Major Facilitator Superfamily
ATCC_33617	plasmid	plasmid:pBIN_1	KS03_RS01235	CDS	119656	120544	889	LysR family transcriptional regulator	2	P:GO:0006355; F:GO:0003700	P:regulation of transcription, DNA-templated; F:DNA-binding transcription factor activity	COG0583@1|root,COG0583@2|Bacteria,1NQWW@1224|Proteobacteria,2UPU8@28211|Alphaproteobacteria	K	LysR substrate binding domain							PF03466	LysR substrate binding domain
ATCC_33617	plasmid	plasmid:pBIN_1	KS03_RS01235	CDS	119656	120544	889	LysR family transcriptional regulator	2	P:GO:0006355; F:GO:0003700	P:regulation of transcription, DNA-templated; F:DNA-binding transcription factor activity	COG0583@1|root,COG0583@2|Bacteria,1NQWW@1224|Proteobacteria,2UPU8@28211|Alphaproteobacteria	K	LysR substrate binding domain							PF00126	Bacterial regulatory helix-turn-helix protein, lysR family
ATCC_33617	plasmid	plasmid:pBIN_1	KS03_RS01240	CDS	120661	125347	4687	DUF6531 domain-containing protein				COG3209@1|root,COG3209@2|Bacteria,1MVV1@1224|Proteobacteria,2VMJI@28216|Betaproteobacteria,1K0C1@119060|Burkholderiaceae	M	Rhs_assc_core RHS repeat-associated core domain protein							PF12639	DNase/tRNase domain of colicin-like bacteriocin
ATCC_33617	plasmid	plasmid:pBIN_1	KS03_RS01240	CDS	120661	125347	4687	DUF6531 domain-containing protein				COG3209@1|root,COG3209@2|Bacteria,1MVV1@1224|Proteobacteria,2VMJI@28216|Betaproteobacteria,1K0C1@119060|Burkholderiaceae	M	Rhs_assc_core RHS repeat-associated core domain protein							PF20148	Domain of unknown function (DUF6531)
ATCC_33617	plasmid	plasmid:pBIN_1	KS03_RS01240	CDS	120661	125347	4687	DUF6531 domain-containing protein				COG3209@1|root,COG3209@2|Bacteria,1MVV1@1224|Proteobacteria,2VMJI@28216|Betaproteobacteria,1K0C1@119060|Burkholderiaceae	M	Rhs_assc_core RHS repeat-associated core domain protein							PF03527	RHS protein
ATCC_33617	plasmid	plasmid:pBIN_1	KS03_RS01240	CDS	120661	125347	4687	DUF6531 domain-containing protein				COG3209@1|root,COG3209@2|Bacteria,1MVV1@1224|Proteobacteria,2VMJI@28216|Betaproteobacteria,1K0C1@119060|Burkholderiaceae	M	Rhs_assc_core RHS repeat-associated core domain protein							PF05593	RHS Repeat
ATCC_33617	plasmid	plasmid:pBIN_1	KS03_RS30785	CDS	125343	125670	328	hypothetical protein				2EV4X@1|root,33NJR@2|Bacteria,1NWF1@1224|Proteobacteria	-	-
ATCC_33617	plasmid	plasmid:pBIN_1	KS03_RS32395	CDS	125626	126214	589	hypothetical protein	1	P:GO:0006281	P:DNA repair	COG0389@1|root,COG0389@2|Bacteria,1MU5X@1224|Proteobacteria,2VIKH@28216|Betaproteobacteria,1JZWF@119060|Burkholderiaceae	L	DNA polymerase
ATCC_33617	plasmid	plasmid:pBIN_1	KS03_RS01250	CDS	126635	127892	1258	IS21 family transposase	5	P:GO:0006310; P:GO:0015074; P:GO:0032196; F:GO:0003676; F:GO:0003677	P:DNA recombination; P:DNA integration; P:transposition; F:nucleic acid binding; F:DNA binding	COG4584@1|root,COG4584@2|Bacteria,1MWIV@1224|Proteobacteria,2VJJ7@28216|Betaproteobacteria,1K2F0@119060|Burkholderiaceae	L	Integrase core domain							PF00665	Integrase core domain
ATCC_33617	plasmid	plasmid:pBIN_1	KS03_RS01250	CDS	126635	127892	1258	IS21 family transposase	5	P:GO:0006310; P:GO:0015074; P:GO:0032196; F:GO:0003676; F:GO:0003677	P:DNA recombination; P:DNA integration; P:transposition; F:nucleic acid binding; F:DNA binding	COG4584@1|root,COG4584@2|Bacteria,1MWIV@1224|Proteobacteria,2VJJ7@28216|Betaproteobacteria,1K2F0@119060|Burkholderiaceae	L	Integrase core domain							PF13936	Helix-turn-helix domain
ATCC_33617	plasmid	plasmid:pBIN_1	KS03_RS01255	CDS	127888	128755	868	IS21-like element ISBcen28 family helper ATPase IstB	1	F:GO:0005524	F:ATP binding	COG1484@1|root,COG1484@2|Bacteria,1MWQX@1224|Proteobacteria,2VMBN@28216|Betaproteobacteria,1K27P@119060|Burkholderiaceae	L	PFAM IstB domain protein ATP-binding protein							PF01695	IstB-like ATP binding protein
ATCC_33617	plasmid	plasmid:pBIN_1	KS03_RS32540	CDS	128755	129022	268	hypothetical protein	1	P:GO:0051301	P:cell division	COG4544@1|root,COG4544@2|Bacteria,1RCPC@1224|Proteobacteria,2VQQ1@28216|Betaproteobacteria,1KI6Q@119060|Burkholderiaceae	S	Component of the SOS system and an inhibitor of cell division. Accumulation of SulA causes rapid cessation of cell division and the appearance of long, non-septate filaments. In the presence of GTP, binds a polymerization-competent form of FtsZ in a 1 1 ratio, thus inhibiting FtsZ polymerization and therefore preventing it from participating in the assembly of the Z ring. This mechanism prevents …
ATCC_33617	plasmid	plasmid:pBIN_1	KS03_RS01260	CDS	129793	130927	1135	hypothetical protein	1	F:GO:0016787	F:hydrolase activity	COG2333@1|root,COG2333@2|Bacteria,1MXMG@1224|Proteobacteria,2VM6Y@28216|Betaproteobacteria	S	competence protein COMEC
ATCC_33617	plasmid	plasmid:pBIN_1	KS03_RS01265	CDS	130944	133170	2227	Mov34/MPN/PAD-1 family protein	6	P:GO:0006508; F:GO:0008233; F:GO:0008237; F:GO:0008641; F:GO:0016787; F:GO:0046872	P:proteolysis; F:peptidase activity; F:metallopeptidase activity; F:ubiquitin-like modifier activating enzyme activity; F:hydrolase activity; F:metal ion binding	COG0476@1|root,COG0476@2|Bacteria,1R3WR@1224|Proteobacteria,2VIXU@28216|Betaproteobacteria,476R7@75682|Oxalobacteraceae	H	Prokaryotic E2 family A							PF14464	Prokaryotic homologs of the JAB domain
ATCC_33617	plasmid	plasmid:pBIN_1	KS03_RS01265	CDS	130944	133170	2227	Mov34/MPN/PAD-1 family protein	6	P:GO:0006508; F:GO:0008233; F:GO:0008237; F:GO:0008641; F:GO:0016787; F:GO:0046872	P:proteolysis; F:peptidase activity; F:metallopeptidase activity; F:ubiquitin-like modifier activating enzyme activity; F:hydrolase activity; F:metal ion binding	COG0476@1|root,COG0476@2|Bacteria,1R3WR@1224|Proteobacteria,2VIXU@28216|Betaproteobacteria,476R7@75682|Oxalobacteraceae	H	Prokaryotic E2 family A							PF14457	Prokaryotic E2 family A
ATCC_33617	plasmid	plasmid:pBIN_1	KS03_RS01270	CDS	133191	133911	721	hypothetical protein	2	C:GO:0016020; C:GO:0016021	C:membrane; C:integral component of membrane	2EJDD@1|root,33D4E@2|Bacteria,1NFTU@1224|Proteobacteria,2UIVW@28211|Alphaproteobacteria	-	-
ATCC_33617	plasmid	plasmid:pBIN_1	KS03_RS01275	CDS	133957	135037	1081	MBL fold metallo-hydrolase				COG2333@1|root,COG2333@2|Bacteria,1R739@1224|Proteobacteria,2VNXM@28216|Betaproteobacteria,1KDP9@119060|Burkholderiaceae	S	competence protein COMEC							PF00753	Metallo-beta-lactamase superfamily
ATCC_33617	plasmid	plasmid:pBIN_1	KS03_RS01280	CDS	135193	135475	283	virulence factor	3	P:GO:0090305; F:GO:0004518; F:GO:0016787	P:nucleic acid phosphodiester bond hydrolysis; F:nuclease activity; F:hydrolase activity	COG3309@1|root,COG3309@2|Bacteria,1N8HT@1224|Proteobacteria	S	Virulence-associated protein D							PF09827	CRISPR associated protein Cas2
ATCC_33617	plasmid	plasmid:pBIN_1	KS03_RS01285	pseudo	135725	136183	459
ATCC_33617	plasmid	plasmid:pBIN_1	KS03_RS01290	CDS	136370	136652	283	DUF1778 domain-containing protein	1	P:GO:0006355	P:regulation of transcription, DNA-templated	COG4453@1|root,COG4453@2|Bacteria,1N7K8@1224|Proteobacteria,2VTUT@28216|Betaproteobacteria,1K9UZ@119060|Burkholderiaceae	S	Protein of unknown function (DUF1778)							PF08681	Protein of unknown function (DUF1778)
ATCC_33617	plasmid	plasmid:pBIN_1	KS03_RS29285	CDS	136648	137143	496	GNAT family N-acetyltransferase	2	F:GO:0008080; F:GO:0016740	F:N-acetyltransferase activity; F:transferase activity	COG0454@1|root,COG0454@2|Bacteria,1RHV9@1224|Proteobacteria,2VQ1X@28216|Betaproteobacteria,1K890@119060|Burkholderiaceae	K	Acetyltransferase (GNAT) domain							PF13508	Acetyltransferase (GNAT) domain
ATCC_33617	plasmid	plasmid:pBIN_1	KS03_RS29290	CDS	137235	137706	472	ProQ/FINO family protein				COG3109@1|root,COG3109@2|Bacteria	T	RNA chaperone with significant RNA binding, RNA strand exchange and RNA duplexing activities							PF04352	ProQ/FINO family
ATCC_33617	plasmid	plasmid:pBIN_1	KS03_RS01300	CDS	137795	140717	2923	conjugative relaxase				COG0507@1|root,COG0507@2|Bacteria,1MUTR@1224|Proteobacteria,2VMWB@28216|Betaproteobacteria,1K4YN@119060|Burkholderiaceae	L	TrwC relaxase							PF08751	TrwC relaxase
ATCC_33617	plasmid	plasmid:pBIN_1	KS03_RS01300	CDS	137795	140717	2923	conjugative relaxase				COG0507@1|root,COG0507@2|Bacteria,1MUTR@1224|Proteobacteria,2VMWB@28216|Betaproteobacteria,1K4YN@119060|Burkholderiaceae	L	TrwC relaxase							PF13604	AAA domain
ATCC_33617	plasmid	plasmid:pBIN_1	KS03_RS01305	CDS	140726	142793	2068	type IV secretion system DNA-binding domain-containing protein	2	C:GO:0016020; C:GO:0016021	C:membrane; C:integral component of membrane	COG3505@1|root,COG3505@2|Bacteria,1PWIG@1224|Proteobacteria,2VRWU@28216|Betaproteobacteria,1K6SF@119060|Burkholderiaceae	U	Type IV secretory system Conjugative DNA transfer							PF10412	Type IV secretion-system coupling protein DNA-binding domain
ATCC_33617	plasmid	plasmid:pBIN_1	KS03_RS29295	CDS	142785	143232	448	hypothetical protein
ATCC_33617	plasmid	plasmid:pBIN_1	KS03_RS01320	CDS	145518	145800	283	hypothetical protein				2CK8N@1|root,2ZKGY@2|Bacteria,1P8JW@1224|Proteobacteria,2W52X@28216|Betaproteobacteria,1KF1I@119060|Burkholderiaceae	-	-
ATCC_33617	plasmid	plasmid:pBIN_1	KS03_RS01325	CDS	145920	146274	355	hypothetical protein	2	C:GO:0016020; C:GO:0016021	C:membrane; C:integral component of membrane
ATCC_33617	plasmid	plasmid:pBIN_1	KS03_RS29300	CDS	146349	146703	355	hypothetical protein				2971H@1|root,2ZU9Y@2|Bacteria,1P8T2@1224|Proteobacteria,2WAMB@28216|Betaproteobacteria,1KBD2@119060|Burkholderiaceae	-	-
ATCC_33617	plasmid	plasmid:pBIN_1	KS03_RS01330	CDS	146760	147036	277	hypothetical protein
ATCC_33617	plasmid	plasmid:pBIN_1	KS03_RS01335	CDS	147050	147341	292	hypothetical protein				2A8B7@1|root,30XCS@2|Bacteria,1PJ7R@1224|Proteobacteria,2W7SG@28216|Betaproteobacteria,1KF2A@119060|Burkholderiaceae	-	-
ATCC_33617	plasmid	plasmid:pBIN_1	KS03_RS01340	CDS	148022	150260	2239	ParB N-terminal domain-containing protein				COG1475@1|root,COG1475@2|Bacteria,1MVF9@1224|Proteobacteria,2VGZJ@28216|Betaproteobacteria,1K223@119060|Burkholderiaceae	K	PFAM ParB domain protein nuclease	K03497	parB, spo0J; ParB family transcriptional regulator, chromosome partitioning protein		Transcription factors	Protein families: genetic information processing	Brite Hierarchies	PF02195	ParB-like nuclease domain
ATCC_33617	plasmid	plasmid:pBIN_1	KS03_RS01340	CDS	148022	150260	2239	ParB N-terminal domain-containing protein				COG1475@1|root,COG1475@2|Bacteria,1MVF9@1224|Proteobacteria,2VGZJ@28216|Betaproteobacteria,1K223@119060|Burkholderiaceae	K	PFAM ParB domain protein nuclease	K03497	parB, spo0J; ParB family transcriptional regulator, chromosome partitioning protein		Chromosome and associated proteins	Protein families: genetic information processing	Brite Hierarchies	PF02195	ParB-like nuclease domain
ATCC_33617	plasmid	plasmid:pBIN_1	KS03_RS01340	CDS	148022	150260	2239	ParB N-terminal domain-containing protein				COG1475@1|root,COG1475@2|Bacteria,1MVF9@1224|Proteobacteria,2VGZJ@28216|Betaproteobacteria,1K223@119060|Burkholderiaceae	K	PFAM ParB domain protein nuclease	K03497	parB, spo0J; ParB family transcriptional regulator, chromosome partitioning protein		Cytoskeleton proteins	Protein families: signaling and cellular processes	Brite Hierarchies	PF02195	ParB-like nuclease domain
ATCC_33617	plasmid	plasmid:pBIN_1	KS03_RS31940	CDS	150901	151069	169	hypothetical protein
ATCC_33617	plasmid	plasmid:pBIN_1	KS03_RS29305	CDS	151727	152545	819	IS5 family transposase	3	P:GO:0006313; F:GO:0003677; F:GO:0004803	P:transposition, DNA-mediated; F:DNA binding; F:transposase activity	COG3293@1|root,COG3293@2|Bacteria,1REUV@1224|Proteobacteria,2VREC@28216|Betaproteobacteria,1K6P0@119060|Burkholderiaceae	L	transposase							PF01609	Transposase DDE domain
ATCC_33617	plasmid	plasmid:pBIN_1	KS03_RS29305	CDS	151727	152545	819	IS5 family transposase	3	P:GO:0006313; F:GO:0003677; F:GO:0004803	P:transposition, DNA-mediated; F:DNA binding; F:transposase activity	COG3293@1|root,COG3293@2|Bacteria,1REUV@1224|Proteobacteria,2VREC@28216|Betaproteobacteria,1K6P0@119060|Burkholderiaceae	L	transposase							PF13340	Putative transposase of IS4/5 family (DUF4096)
ATCC_33617	plasmid	plasmid:pBIN_1	KS03_RS30795	CDS	152469	152823	355	hypothetical protein				2F8IE@1|root,32P1M@2|Bacteria,1PID0@1224|Proteobacteria,2W70Z@28216|Betaproteobacteria,1KDGR@119060|Burkholderiaceae	-	-
ATCC_33617	plasmid	plasmid:pBIN_1	KS03_RS01355	CDS	152847	153501	655	DNA methyltransferase	7	P:GO:0006306; P:GO:0032259; F:GO:0003676; F:GO:0003677; F:GO:0008168; F:GO:0008170; F:GO:0016740	P:DNA methylation; P:methylation; F:nucleic acid binding; F:DNA binding; F:methyltransferase activity; F:N-methyltransferase activity; F:transferase activity	COG0863@1|root,COG0863@2|Bacteria,1R7KV@1224|Proteobacteria,2VU55@28216|Betaproteobacteria,1KB3M@119060|Burkholderiaceae	L	Belongs to the N(4) N(6)-methyltransferase family	K07319	yhdJ; adenine-specific DNA-methyltransferase	[EC:2.1.1.72]	Prokaryotic defense system	Protein families: signaling and cellular processes	Brite Hierarchies	PF01555	DNA methylase
ATCC_33617	plasmid	plasmid:pBIN_1	KS03_RS01360	CDS	154234	155062	829	DUF945 domain-containing protein				COG1961@1|root,COG1961@2|Bacteria,1QTU0@1224|Proteobacteria,2VITE@28216|Betaproteobacteria,1K1XD@119060|Burkholderiaceae	L	Domain of unknown function (DUF932)							PF06067	Domain of unknown function (DUF932)
ATCC_33617	plasmid	plasmid:pBIN_1	KS03_RS01365	CDS	155618	156080	463	hypothetical protein
ATCC_33617	plasmid	plasmid:pBIN_1	KS03_RS01370	CDS	156140	156797	658	hypothetical protein				2DR48@1|root,33A3G@2|Bacteria,1NN7E@1224|Proteobacteria,2WCTN@28216|Betaproteobacteria,1K8EU@119060|Burkholderiaceae	-	-							PF18847	Large polyvalent protein associated domain 29
ATCC_33617	plasmid	plasmid:pBIN_1	KS03_RS01375	CDS	156862	157342	481	hypothetical protein
ATCC_33617	plasmid	plasmid:pBIN_1	KS03_RS29315	CDS	158227	158704	478	hypothetical protein				2A885@1|root,30X97@2|Bacteria,1PJ3F@1224|Proteobacteria,2W7NM@28216|Betaproteobacteria,1KEVV@119060|Burkholderiaceae	-	-
ATCC_33617	plasmid	plasmid:pBIN_1	KS03_RS01385	CDS	158755	159202	448	hypothetical protein				2AGAJ@1|root,316G3@2|Bacteria,1PXIS@1224|Proteobacteria,2WCY9@28216|Betaproteobacteria,1K8RH@119060|Burkholderiaceae	-	-
ATCC_33617	plasmid	plasmid:pBIN_1	KS03_RS01390	CDS	159335	160484	1150	DUF3560 domain-containing protein	3	P:GO:0032259; F:GO:0008168; F:GO:0016740	P:methylation; F:methyltransferase activity; F:transferase activity	COG2518@1|root,COG2518@2|Bacteria,1R15Z@1224|Proteobacteria,2WHZV@28216|Betaproteobacteria,4AFSI@80864|Comamonadaceae	O	Domain of unknown function (DUF3560)							PF12083	Domain of unknown function (DUF3560)
ATCC_33617	plasmid	plasmid:pBIN_1	KS03_RS01395	CDS	160946	161645	700	hypothetical protein
ATCC_33617	plasmid	plasmid:pBIN_1	KS03_RS01400	CDS	161644	162031	388	hypothetical protein
ATCC_33617	plasmid	plasmid:pBIN_1	KS03_RS01405	CDS	162460	163075	616	HEPN domain-containing protein				2BRE1@1|root,32KCU@2|Bacteria,1P7S3@1224|Proteobacteria	-	-							PF18735	RiboL-PSP-HEPN
ATCC_33617	plasmid	plasmid:pBIN_1	KS03_RS01410	CDS	163074	164100	1027	AAA family ATPase				COG1192@1|root,COG1192@2|Bacteria,1G2GG@1117|Cyanobacteria,1HS7X@1161|Nostocales	D	AAA domain							PF13614	AAA domain
ATCC_33617	plasmid	plasmid:pBIN_1	KS03_RS01415	CDS	164771	165035	265	hypothetical protein
ATCC_33617	plasmid	plasmid:pBIN_1	KS03_RS29320	CDS	165043	165367	325	H-NS histone family protein	4	P:GO:0006355; F:GO:0003677; C:GO:0005737; C:GO:0009295	P:regulation of transcription, DNA-templated; F:DNA binding; C:cytoplasm; C:nucleoid	COG2916@1|root,COG2916@2|Bacteria,1PINA@1224|Proteobacteria,2W79P@28216|Betaproteobacteria,1KE5E@119060|Burkholderiaceae	K	H-NS histone family							PF00816	H-NS histone family
ATCC_33617	plasmid	plasmid:pBIN_1	KS03_RS01420	pseudo	165502	166867	1366
ATCC_33617	plasmid	plasmid:pBIN_1	KS03_RS29325	CDS	167003	167821	819	IS5 family transposase	3	P:GO:0006313; F:GO:0003677; F:GO:0004803	P:transposition, DNA-mediated; F:DNA binding; F:transposase activity	COG3293@1|root,COG3293@2|Bacteria,1REUV@1224|Proteobacteria,2VREC@28216|Betaproteobacteria,1K6P0@119060|Burkholderiaceae	L	transposase							PF01609	Transposase DDE domain
ATCC_33617	plasmid	plasmid:pBIN_1	KS03_RS29325	CDS	167003	167821	819	IS5 family transposase	3	P:GO:0006313; F:GO:0003677; F:GO:0004803	P:transposition, DNA-mediated; F:DNA binding; F:transposase activity	COG3293@1|root,COG3293@2|Bacteria,1REUV@1224|Proteobacteria,2VREC@28216|Betaproteobacteria,1K6P0@119060|Burkholderiaceae	L	transposase							PF13340	Putative transposase of IS4/5 family (DUF4096)
ATCC_33617	plasmid	plasmid:pBIN_1	KS03_RS01425	CDS	168215	169682	1468	ATP-binding domain-containing protein	8	P:GO:0032508; F:GO:0000166; F:GO:0003677; F:GO:0003678; F:GO:0004386; F:GO:0005524; F:GO:0016787; F:GO:0016887	P:DNA duplex unwinding; F:nucleotide binding; F:DNA binding; F:DNA helicase activity; F:helicase activity; F:ATP binding; F:hydrolase activity; F:ATP hydrolysis activity	COG0210@1|root,COG0210@2|Bacteria,1R4PV@1224|Proteobacteria,2VPRB@28216|Betaproteobacteria,1K216@119060|Burkholderiaceae	L	UvrD-like helicase C-terminal domain							PF13361	UvrD-like helicase C-terminal domain
ATCC_33617	plasmid	plasmid:pBIN_1	KS03_RS01425	CDS	168215	169682	1468	ATP-binding domain-containing protein	8	P:GO:0032508; F:GO:0000166; F:GO:0003677; F:GO:0003678; F:GO:0004386; F:GO:0005524; F:GO:0016787; F:GO:0016887	P:DNA duplex unwinding; F:nucleotide binding; F:DNA binding; F:DNA helicase activity; F:helicase activity; F:ATP binding; F:hydrolase activity; F:ATP hydrolysis activity	COG0210@1|root,COG0210@2|Bacteria,1R4PV@1224|Proteobacteria,2VPRB@28216|Betaproteobacteria,1K216@119060|Burkholderiaceae	L	UvrD-like helicase C-terminal domain							PF00580	UvrD/REP helicase N-terminal domain
ATCC_33617	plasmid	plasmid:pBIN_1	KS03_RS01430	pseudo	169739	170207	469
ATCC_33617	plasmid	plasmid:pBIN_2	KS03_RS00065	CDS	13967	14432	466	Lrp/AsnC family transcriptional regulator	3	P:GO:0006355; F:GO:0003677; F:GO:0043565	P:regulation of transcription, DNA-templated; F:DNA binding; F:sequence-specific DNA binding	COG1522@1|root,COG1522@2|Bacteria,1RDB3@1224|Proteobacteria,2VRFS@28216|Betaproteobacteria,1K7DK@119060|Burkholderiaceae	K	Transcriptional regulator	K05800	ybaO; Lrp/AsnC family transcriptional regulator		Transcription factors	Protein families: genetic information processing	Brite Hierarchies	PF13412	Winged helix-turn-helix DNA-binding
ATCC_33617	plasmid	plasmid:pBIN_2	KS03_RS00065	CDS	13967	14432	466	Lrp/AsnC family transcriptional regulator	3	P:GO:0006355; F:GO:0003677; F:GO:0043565	P:regulation of transcription, DNA-templated; F:DNA binding; F:sequence-specific DNA binding	COG1522@1|root,COG1522@2|Bacteria,1RDB3@1224|Proteobacteria,2VRFS@28216|Betaproteobacteria,1K7DK@119060|Burkholderiaceae	K	Transcriptional regulator	K05800	ybaO; Lrp/AsnC family transcriptional regulator		Transcription factors	Protein families: genetic information processing	Brite Hierarchies	PF01037	Lrp/AsnC ligand binding domain
ATCC_33617	plasmid	plasmid:pBIN_2	KS03_RS30695	CDS	14654	14876	223	hypothetical protein	3	P:GO:0006310; P:GO:0015074; F:GO:0003677	P:DNA recombination; P:DNA integration; F:DNA binding
ATCC_33617	plasmid	plasmid:pBIN_2	KS03_RS00070	CDS	15025	15220	196	hypothetical protein
ATCC_33617	plasmid	plasmid:pBIN_2	KS03_RS00075	CDS	15278	15629	352	type II toxin-antitoxin system ChpB family toxin	1	F:GO:0003677	F:DNA binding	COG2337@1|root,COG2337@2|Bacteria,1RH4Z@1224|Proteobacteria,2VVSM@28216|Betaproteobacteria,1K8AV@119060|Burkholderiaceae	T	PFAM PemK family protein	K18841	chpB, chpBK; mRNA interferase ChpB	[EC:3.1.-.-]	Prokaryotic defense system	Protein families: signaling and cellular processes	Brite Hierarchies	PF02452	PemK-like, MazF-like toxin of type II toxin-antitoxin system
ATCC_33617	plasmid	plasmid:pBIN_2	KS03_RS00080	CDS	15622	15874	253	AbrB/MazE/SpoVT family DNA-binding domain-containing protein	1	F:GO:0003677	F:DNA binding	COG2336@1|root,COG2336@2|Bacteria,1NCQD@1224|Proteobacteria,2VY18@28216|Betaproteobacteria,1K9MP@119060|Burkholderiaceae	T	family. transcriptional regulator	K18842	chpS, chpBI; antitoxin ChpS		Prokaryotic defense system	Protein families: signaling and cellular processes	Brite Hierarchies	PF04014	Antidote-toxin recognition MazE, bacterial antitoxin
ATCC_33617	plasmid	plasmid:pBIN_2	KS03_RS00085	CDS	16136	16544	409	hypothetical protein				2A7UF@1|root,30WTN@2|Bacteria,1PII4@1224|Proteobacteria,2W750@28216|Betaproteobacteria,1KDTZ@119060|Burkholderiaceae	-	-
ATCC_33617	plasmid	plasmid:pBIN_2	KS03_RS00090	CDS	16646	18482	1837	site-specific integrase	3	P:GO:0006310; P:GO:0015074; F:GO:0003677	P:DNA recombination; P:DNA integration; F:DNA binding	COG4974@1|root,COG4974@2|Bacteria,1R9GT@1224|Proteobacteria,2VPD2@28216|Betaproteobacteria,1K4HA@119060|Burkholderiaceae	L	Belongs to the 'phage' integrase family	K04763	xerD; integrase/recombinase XerD		Chromosome and associated proteins	Protein families: genetic information processing	Brite Hierarchies	PF12482	Phage integrase protein
ATCC_33617	plasmid	plasmid:pBIN_2	KS03_RS00090	CDS	16646	18482	1837	site-specific integrase	3	P:GO:0006310; P:GO:0015074; F:GO:0003677	P:DNA recombination; P:DNA integration; F:DNA binding	COG4974@1|root,COG4974@2|Bacteria,1R9GT@1224|Proteobacteria,2VPD2@28216|Betaproteobacteria,1K4HA@119060|Burkholderiaceae	L	Belongs to the 'phage' integrase family	K04763	xerD; integrase/recombinase XerD		Chromosome and associated proteins	Protein families: genetic information processing	Brite Hierarchies	PF00589	Phage integrase family
ATCC_33617	plasmid	plasmid:pBIN_2	KS03_RS00095	CDS	18484	18826	343	hypothetical protein				2A7VU@1|root,30WVG@2|Bacteria,1PIKC@1224|Proteobacteria,2W76X@28216|Betaproteobacteria,1KDYZ@119060|Burkholderiaceae	-	-
ATCC_33617	plasmid	plasmid:pBIN_2	KS03_RS00100	CDS	18882	19128	247	hypothetical protein
ATCC_33617	plasmid	plasmid:pBIN_2	KS03_RS30700	CDS	19124	19367	244	hypothetical protein
ATCC_33617	plasmid	plasmid:pBIN_2	KS03_RS00110	CDS	19380	19665	286	hypothetical protein
ATCC_33617	plasmid	plasmid:pBIN_2	KS03_RS00115	CDS	20416	20605	190	hypothetical protein
ATCC_33617	plasmid	plasmid:pBIN_2	KS03_RS00120	CDS	20774	21308	535	RES family NAD+ phosphorylase				COG5654@1|root,COG5654@2|Bacteria,1RJGT@1224|Proteobacteria,2VVKS@28216|Betaproteobacteria,1K8XF@119060|Burkholderiaceae	S	RES							PF08808	RES domain
ATCC_33617	plasmid	plasmid:pBIN_2	KS03_RS00125	CDS	21304	21721	418	DUF2384 domain-containing protein				2DND4@1|root,32WVS@2|Bacteria,1N403@1224|Proteobacteria,2VW48@28216|Betaproteobacteria,1K8TV@119060|Burkholderiaceae	-	-
ATCC_33617	plasmid	plasmid:pBIN_2	KS03_RS00130	CDS	21868	22054	187	hypothetical protein
ATCC_33617	plasmid	plasmid:pBIN_2	KS03_RS00135	CDS	22593	22920	328	hypothetical protein
ATCC_33617	plasmid	plasmid:pBIN_2	KS03_RS28875	CDS	23041	24373	1333	replication protein O				COG2188@1|root,COG2188@2|Bacteria,1P8DB@1224|Proteobacteria,2W65W@28216|Betaproteobacteria,1KAUI@119060|Burkholderiaceae	K	Replication protein
ATCC_33617	plasmid	plasmid:pBIN_2	KS03_RS29090	CDS	24709	25789	1081	ParB N-terminal domain-containing protein				COG1475@1|root,COG1475@2|Bacteria,1ND69@1224|Proteobacteria,2VWKF@28216|Betaproteobacteria,1KGYU@119060|Burkholderiaceae	K	Belongs to the ParB family	K03497	parB, spo0J; ParB family transcriptional regulator, chromosome partitioning protein		Transcription factors	Protein families: genetic information processing	Brite Hierarchies	PF02195	ParB-like nuclease domain
ATCC_33617	plasmid	plasmid:pBIN_2	KS03_RS29090	CDS	24709	25789	1081	ParB N-terminal domain-containing protein				COG1475@1|root,COG1475@2|Bacteria,1ND69@1224|Proteobacteria,2VWKF@28216|Betaproteobacteria,1KGYU@119060|Burkholderiaceae	K	Belongs to the ParB family	K03497	parB, spo0J; ParB family transcriptional regulator, chromosome partitioning protein		Chromosome and associated proteins	Protein families: genetic information processing	Brite Hierarchies	PF02195	ParB-like nuclease domain
ATCC_33617	plasmid	plasmid:pBIN_2	KS03_RS29090	CDS	24709	25789	1081	ParB N-terminal domain-containing protein				COG1475@1|root,COG1475@2|Bacteria,1ND69@1224|Proteobacteria,2VWKF@28216|Betaproteobacteria,1KGYU@119060|Burkholderiaceae	K	Belongs to the ParB family	K03497	parB, spo0J; ParB family transcriptional regulator, chromosome partitioning protein		Cytoskeleton proteins	Protein families: signaling and cellular processes	Brite Hierarchies	PF02195	ParB-like nuclease domain
ATCC_33617	plasmid	plasmid:pBIN_2	KS03_RS00150	CDS	25791	26946	1156	AAA family ATPase				COG1192@1|root,COG1192@2|Bacteria,1MVJU@1224|Proteobacteria,2VP4N@28216|Betaproteobacteria,1K2X1@119060|Burkholderiaceae	D	Cobyrinic acid ac-diamide synthase							PF13614	AAA domain
ATCC_33617	plasmid	plasmid:pBIN_2	KS03_RS29095	CDS	27892	28312	421	hypothetical protein				2DCRG@1|root,32U03@2|Bacteria,1MZFR@1224|Proteobacteria,2W6TA@28216|Betaproteobacteria,1KCM4@119060|Burkholderiaceae	-	-
ATCC_33617	plasmid	plasmid:pBIN_2	KS03_RS00160	CDS	28319	31301	2983	Tn3 family transposase	5	P:GO:0006310; P:GO:0006313; P:GO:0032196; F:GO:0003677; F:GO:0004803	P:DNA recombination; P:transposition, DNA-mediated; P:transposition; F:DNA binding; F:transposase activity	COG4644@1|root,COG4644@2|Bacteria,1MUIU@1224|Proteobacteria,2VI8A@28216|Betaproteobacteria,1K3F0@119060|Burkholderiaceae	L	Transposase Tn3 family protein							PF13700	Domain of unknown function (DUF4158)
ATCC_33617	plasmid	plasmid:pBIN_2	KS03_RS00160	CDS	28319	31301	2983	Tn3 family transposase	5	P:GO:0006310; P:GO:0006313; P:GO:0032196; F:GO:0003677; F:GO:0004803	P:DNA recombination; P:transposition, DNA-mediated; P:transposition; F:DNA binding; F:transposase activity	COG4644@1|root,COG4644@2|Bacteria,1MUIU@1224|Proteobacteria,2VI8A@28216|Betaproteobacteria,1K3F0@119060|Burkholderiaceae	L	Transposase Tn3 family protein							PF01526	Tn3 transposase DDE domain
ATCC_33617	plasmid	plasmid:pBIN_2	KS03_RS00165	CDS	31590	31881	292	DUF427 domain-containing protein	1	F:GO:0016740	F:transferase activity	COG2343@1|root,COG2343@2|Bacteria,1N1K4@1224|Proteobacteria,2VU8K@28216|Betaproteobacteria	S	Domain of unknown function (DUF427)							PF04248	Domain of unknown function (DUF427)
ATCC_33617	plasmid	plasmid:pBIN_2	KS03_RS00170	CDS	31939	32743	805	DUF547 domain-containing protein				COG0398@1|root,COG0398@2|Bacteria,1RBAE@1224|Proteobacteria,2VP38@28216|Betaproteobacteria	S	Protein of unknown function, DUF547							PF04784	Protein of unknown function, DUF547
ATCC_33617	plasmid	plasmid:pBIN_2	KS03_RS00175	CDS	32739	34137	1399	radical SAM protein	11	P:GO:0006777; F:GO:0000166; F:GO:0003824; F:GO:0005525; F:GO:0016829; F:GO:0046872; F:GO:0051536; F:GO:0051539; F:GO:0061798; F:GO:1904047; C:GO:0019008	P:Mo-molybdopterin cofactor biosynthetic process; F:nucleotide binding; F:catalytic activity; F:GTP binding; F:lyase activity; F:metal ion binding; F:iron-sulfur cluster binding; F:4 iron, 4 sulfur cluster binding; F:GTP 3',8'-cyclase activity; F:S-adenosyl-L-methionine binding; C:molybdopterin synthase complex	COG0535@1|root,COG0535@2|Bacteria,1R0ZW@1224|Proteobacteria	S	Pyrroloquinoline quinone biosynthesis protein E	K06937	K06937; 7,8-dihydro-6-hydroxymethylpterin dimethyltransferase	[EC:2.1.1.-]	Enzymes with EC numbers	Unclassified: metabolism	Not Included in Pathway or Brite	PF13353	4Fe-4S single cluster domain
ATCC_33617	plasmid	plasmid:pBIN_2	KS03_RS00175	CDS	32739	34137	1399	radical SAM protein	11	P:GO:0006777; F:GO:0000166; F:GO:0003824; F:GO:0005525; F:GO:0016829; F:GO:0046872; F:GO:0051536; F:GO:0051539; F:GO:0061798; F:GO:1904047; C:GO:0019008	P:Mo-molybdopterin cofactor biosynthetic process; F:nucleotide binding; F:catalytic activity; F:GTP binding; F:lyase activity; F:metal ion binding; F:iron-sulfur cluster binding; F:4 iron, 4 sulfur cluster binding; F:GTP 3',8'-cyclase activity; F:S-adenosyl-L-methionine binding; C:molybdopterin synthase complex	COG0535@1|root,COG0535@2|Bacteria,1R0ZW@1224|Proteobacteria	S	Pyrroloquinoline quinone biosynthesis protein E	K06937	K06937; 7,8-dihydro-6-hydroxymethylpterin dimethyltransferase	[EC:2.1.1.-]	Enzymes with EC numbers	Unclassified: metabolism	Not Included in Pathway or Brite	PF04055	Radical SAM superfamily
ATCC_33617	plasmid	plasmid:pBIN_2	KS03_RS00180	CDS	34315	35143	829	hypothetical protein				28JXP@1|root,2Z9N4@2|Bacteria,1MXG4@1224|Proteobacteria,2W49D@28216|Betaproteobacteria	S	Permuted papain-like amidase enzyme, YaeF/YiiX, C92 family							PF05708	Permuted papain-like amidase enzyme, YaeF/YiiX, C92 family
ATCC_33617	plasmid	plasmid:pBIN_2	KS03_RS29100	CDS	35238	36258	1021	hypothetical protein				COG0639@1|root,COG0639@2|Bacteria,1PXN4@1224|Proteobacteria	T	COG0639 Diadenosine tetraphosphatase and related serine threonine protein phosphatases
ATCC_33617	plasmid	plasmid:pBIN_2	KS03_RS00190	CDS	36269	37253	985	arsenosugar biosynthesis radical SAM protein ArsS	3	F:GO:0003824; F:GO:0046872; F:GO:0051536	F:catalytic activity; F:metal ion binding; F:iron-sulfur cluster binding	COG0535@1|root,COG0535@2|Bacteria,1MU07@1224|Proteobacteria,2VKSA@28216|Betaproteobacteria	S	Protein of unknown function (DUF3641)							PF04055	Radical SAM superfamily
ATCC_33617	plasmid	plasmid:pBIN_2	KS03_RS00190	CDS	36269	37253	985	arsenosugar biosynthesis radical SAM protein ArsS	3	F:GO:0003824; F:GO:0046872; F:GO:0051536	F:catalytic activity; F:metal ion binding; F:iron-sulfur cluster binding	COG0535@1|root,COG0535@2|Bacteria,1MU07@1224|Proteobacteria,2VKSA@28216|Betaproteobacteria	S	Protein of unknown function (DUF3641)							PF12345	Protein of unknown function (DUF3641)
ATCC_33617	plasmid	plasmid:pBIN_2	KS03_RS00195	CDS	37469	38426	958	hypothetical protein	2	C:GO:0016020; C:GO:0016021	C:membrane; C:integral component of membrane	28JAP@1|root,2Z95J@2|Bacteria,1N7JU@1224|Proteobacteria,2WC01@28216|Betaproteobacteria,1K6ZG@119060|Burkholderiaceae	-	-
ATCC_33617	plasmid	plasmid:pBIN_2	KS03_RS00200	CDS	38579	38966	388	thioredoxin family protein	1	F:GO:0015036	F:disulfide oxidoreductase activity	COG0526@1|root,COG0526@2|Bacteria,1MZQJ@1224|Proteobacteria,2VT2D@28216|Betaproteobacteria,1K9JE@119060|Burkholderiaceae	CO	Thioredoxin	K03671	trxA; thioredoxin 1		NOD-like receptor signaling pathway	Immune system	Organismal Systems	PF00085	Thioredoxin
ATCC_33617	plasmid	plasmid:pBIN_2	KS03_RS00200	CDS	38579	38966	388	thioredoxin family protein	1	F:GO:0015036	F:disulfide oxidoreductase activity	COG0526@1|root,COG0526@2|Bacteria,1MZQJ@1224|Proteobacteria,2VT2D@28216|Betaproteobacteria,1K9JE@119060|Burkholderiaceae	CO	Thioredoxin	K03671	trxA; thioredoxin 1		Salmonella infection	Infectious disease: bacterial	Human Diseases	PF00085	Thioredoxin
ATCC_33617	plasmid	plasmid:pBIN_2	KS03_RS00200	CDS	38579	38966	388	thioredoxin family protein	1	F:GO:0015036	F:disulfide oxidoreductase activity	COG0526@1|root,COG0526@2|Bacteria,1MZQJ@1224|Proteobacteria,2VT2D@28216|Betaproteobacteria,1K9JE@119060|Burkholderiaceae	CO	Thioredoxin	K03671	trxA; thioredoxin 1		Parkinson disease	Neurodegenerative disease	Human Diseases	PF00085	Thioredoxin
ATCC_33617	plasmid	plasmid:pBIN_2	KS03_RS00200	CDS	38579	38966	388	thioredoxin family protein	1	F:GO:0015036	F:disulfide oxidoreductase activity	COG0526@1|root,COG0526@2|Bacteria,1MZQJ@1224|Proteobacteria,2VT2D@28216|Betaproteobacteria,1K9JE@119060|Burkholderiaceae	CO	Thioredoxin	K03671	trxA; thioredoxin 1		Fluid shear stress and atherosclerosis	Cardiovascular disease	Human Diseases	PF00085	Thioredoxin
ATCC_33617	plasmid	plasmid:pBIN_2	KS03_RS00200	CDS	38579	38966	388	thioredoxin family protein	1	F:GO:0015036	F:disulfide oxidoreductase activity	COG0526@1|root,COG0526@2|Bacteria,1MZQJ@1224|Proteobacteria,2VT2D@28216|Betaproteobacteria,1K9JE@119060|Burkholderiaceae	CO	Thioredoxin	K03671	trxA; thioredoxin 1		Chaperones and folding catalysts	Protein families: genetic information processing	Brite Hierarchies	PF00085	Thioredoxin
ATCC_33617	plasmid	plasmid:pBIN_2	KS03_RS00205	CDS	38965	39694	730	cytochrome c biogenesis CcdA family protein	5	P:GO:0017004; F:GO:0016491; C:GO:0005886; C:GO:0016020; C:GO:0016021	P:cytochrome complex assembly; F:oxidoreductase activity; C:plasma membrane; C:membrane; C:integral component of membrane	COG0785@1|root,COG0785@2|Bacteria,1MVV0@1224|Proteobacteria,2VIPU@28216|Betaproteobacteria,1KH2M@119060|Burkholderiaceae	O	Cytochrome C biogenesis protein transmembrane region							PF02683	Cytochrome C biogenesis protein transmembrane region
ATCC_33617	plasmid	plasmid:pBIN_2	KS03_RS00210	CDS	39775	40366	592	sigma-70 family RNA polymerase sigma factor	7	P:GO:0006352; P:GO:0006355; P:GO:0050896; P:GO:2000142; F:GO:0003677; F:GO:0003700; F:GO:0016987	P:DNA-templated transcription, initiation; P:regulation of transcription, DNA-templated; P:response to stimulus; P:regulation of DNA-templated transcription, initiation; F:DNA binding; F:DNA-binding transcription factor activity; F:sigma factor activity	COG1595@1|root,COG1595@2|Bacteria,1RHKM@1224|Proteobacteria,2VRMP@28216|Betaproteobacteria,1K198@119060|Burkholderiaceae	K	Belongs to the sigma-70 factor family. ECF subfamily	K03088	rpoE; RNA polymerase sigma-70 factor, ECF subfamily		Transcription machinery	Protein families: genetic information processing	Brite Hierarchies	PF08281	Sigma-70, region 4
ATCC_33617	plasmid	plasmid:pBIN_2	KS03_RS00210	CDS	39775	40366	592	sigma-70 family RNA polymerase sigma factor	7	P:GO:0006352; P:GO:0006355; P:GO:0050896; P:GO:2000142; F:GO:0003677; F:GO:0003700; F:GO:0016987	P:DNA-templated transcription, initiation; P:regulation of transcription, DNA-templated; P:response to stimulus; P:regulation of DNA-templated transcription, initiation; F:DNA binding; F:DNA-binding transcription factor activity; F:sigma factor activity	COG1595@1|root,COG1595@2|Bacteria,1RHKM@1224|Proteobacteria,2VRMP@28216|Betaproteobacteria,1K198@119060|Burkholderiaceae	K	Belongs to the sigma-70 factor family. ECF subfamily	K03088	rpoE; RNA polymerase sigma-70 factor, ECF subfamily		Transcription machinery	Protein families: genetic information processing	Brite Hierarchies	PF04542	Sigma-70 region 2
ATCC_33617	plasmid	plasmid:pBIN_2	KS03_RS29105	CDS	40359	40569	211	zf-HC2 domain-containing protein				COG5660@1|root,COG5660@2|Bacteria,1NH4R@1224|Proteobacteria	S	Transmembrane anti-sigma factor							PF13490	Putative zinc-finger
ATCC_33617	plasmid	plasmid:pBIN_2	KS03_RS00215	CDS	40633	42007	1375	MFS transporter	5	P:GO:0055085; F:GO:0022857; C:GO:0016020; C:GO:0016021; C:GO:0110165	P:transmembrane transport; F:transmembrane transporter activity; C:membrane; C:integral component of membrane; C:cellular anatomical entity	COG0477@1|root,COG0477@2|Bacteria,1NS3F@1224|Proteobacteria,2WGGT@28216|Betaproteobacteria,1KIE5@119060|Burkholderiaceae	EGP	Sugar (and other) transporter							PF00083	Sugar (and other) transporter
ATCC_33617	plasmid	plasmid:pBIN_2	KS03_RS29110	CDS	42121	42391	271	hypothetical protein				2ERX4@1|root,33JGB@2|Bacteria,1NKSY@1224|Proteobacteria,2VYE5@28216|Betaproteobacteria	-	-
ATCC_33617	plasmid	plasmid:pBIN_2	KS03_RS28885	CDS	42491	43214	724	hypothetical protein				28Q4X@1|root,2ZCN0@2|Bacteria,1RA2A@1224|Proteobacteria,2VX5Q@28216|Betaproteobacteria,1KAA5@119060|Burkholderiaceae	-	-
ATCC_33617	plasmid	plasmid:pBIN_2	KS03_RS00225	CDS	43210	44092	883	S-methyl-5'-thioadenosine phosphorylase	8	P:GO:0006166; P:GO:0009116; P:GO:0019509; F:GO:0003824; F:GO:0016740; F:GO:0016757; F:GO:0016763; F:GO:0017061	P:purine ribonucleoside salvage; P:nucleoside metabolic process; P:L-methionine salvage from methylthioadenosine; F:catalytic activity; F:transferase activity; F:glycosyltransferase activity; F:pentosyltransferase activity; F:S-methyl-5-thioadenosine phosphorylase activity	COG0005@1|root,COG0005@2|Bacteria,1MUWW@1224|Proteobacteria,2VJQQ@28216|Betaproteobacteria,1K9FB@119060|Burkholderiaceae	F	Catalyzes the reversible phosphorylation of S-methyl-5'- thioadenosine (MTA) to adenine and 5-methylthioribose-1-phosphate. Involved in the breakdown of MTA, a major by-product of polyamine biosynthesis. Responsible for the first step in the methionine salvage pathway after MTA has been generated from S- adenosylmethionine. Has broad substrate specificity with 6- aminopurine nucleosides as prefer…	K00772	mtaP, MTAP; 5'-methylthioadenosine phosphorylase	[EC:2.4.2.28]	Cysteine and methionine metabolism	Amino acid metabolism	Metabolism	PF01048	Phosphorylase superfamily
ATCC_33617	plasmid	plasmid:pBIN_2	KS03_RS00230	CDS	44199	44901	703	TIGR04283 family arsenosugar biosynthesis glycosyltransferase	1	F:GO:0016740	F:transferase activity	COG1215@1|root,COG1215@2|Bacteria,1RA75@1224|Proteobacteria,2VQQD@28216|Betaproteobacteria	M	Glycosyl transferase family 2							PF00535	Glycosyl transferase family 2
ATCC_33617	plasmid	plasmid:pBIN_2	KS03_RS00235	CDS	44909	45566	658	TIGR04282 family arsenosugar biosynthesis glycosyltransferase	1	F:GO:0016740	F:transferase activity	COG3222@1|root,COG3222@2|Bacteria,1RB1V@1224|Proteobacteria,2VRM0@28216|Betaproteobacteria	S	Uncharacterized protein conserved in bacteria (DUF2064)	K09931	K09931; uncharacterized protein		Function unknown	Poorly characterized	Not Included in Pathway or Brite	PF09837	Uncharacterized protein conserved in bacteria (DUF2064)
ATCC_33617	plasmid	plasmid:pBIN_2	KS03_RS00240	CDS	45562	46654	1093	FAD-dependent oxidoreductase	5	P:GO:0006116; F:GO:0003954; F:GO:0016491; C:GO:0016020; C:GO:0016021	P:NADH oxidation; F:NADH dehydrogenase activity; F:oxidoreductase activity; C:membrane; C:integral component of membrane	COG1252@1|root,COG1252@2|Bacteria,1QUKT@1224|Proteobacteria,2WGU5@28216|Betaproteobacteria	C	pyridine nucleotide-disulfide oxidoreductase family protein							PF07992	Pyridine nucleotide-disulphide oxidoreductase
ATCC_33617	plasmid	plasmid:pBIN_2	KS03_RS00245	CDS	46654	47014	361	hypothetical protein
ATCC_33617	plasmid	plasmid:pBIN_2	KS03_RS29115	CDS	47089	47290	202	zf-HC2 domain-containing protein													PF13490	Putative zinc-finger
ATCC_33617	plasmid	plasmid:pBIN_2	KS03_RS00250	CDS	47364	49575	2212	bifunctional TVP38/TMEM64 family protein/FAD-dependent oxidoreductase	4	P:GO:0045454; F:GO:0000166; F:GO:0016491; F:GO:0050660	P:cell redox homeostasis; F:nucleotide binding; F:oxidoreductase activity; F:flavin adenine dinucleotide binding	COG0398@1|root,COG1249@1|root,COG0398@2|Bacteria,COG1249@2|Bacteria,1MU2U@1224|Proteobacteria,2VHC1@28216|Betaproteobacteria,1K09M@119060|Burkholderiaceae	C	Belongs to the class-I pyridine nucleotide-disulfide oxidoreductase family							PF09335	SNARE associated Golgi protein
ATCC_33617	plasmid	plasmid:pBIN_2	KS03_RS00250	CDS	47364	49575	2212	bifunctional TVP38/TMEM64 family protein/FAD-dependent oxidoreductase	4	P:GO:0045454; F:GO:0000166; F:GO:0016491; F:GO:0050660	P:cell redox homeostasis; F:nucleotide binding; F:oxidoreductase activity; F:flavin adenine dinucleotide binding	COG0398@1|root,COG1249@1|root,COG0398@2|Bacteria,COG1249@2|Bacteria,1MU2U@1224|Proteobacteria,2VHC1@28216|Betaproteobacteria,1K09M@119060|Burkholderiaceae	C	Belongs to the class-I pyridine nucleotide-disulfide oxidoreductase family							PF07992	Pyridine nucleotide-disulphide oxidoreductase
ATCC_33617	plasmid	plasmid:pBIN_2	KS03_RS00250	CDS	47364	49575	2212	bifunctional TVP38/TMEM64 family protein/FAD-dependent oxidoreductase	4	P:GO:0045454; F:GO:0000166; F:GO:0016491; F:GO:0050660	P:cell redox homeostasis; F:nucleotide binding; F:oxidoreductase activity; F:flavin adenine dinucleotide binding	COG0398@1|root,COG1249@1|root,COG0398@2|Bacteria,COG1249@2|Bacteria,1MU2U@1224|Proteobacteria,2VHC1@28216|Betaproteobacteria,1K09M@119060|Burkholderiaceae	C	Belongs to the class-I pyridine nucleotide-disulfide oxidoreductase family							PF02852	Pyridine nucleotide-disulphide oxidoreductase, dimerisation domain
ATCC_33617	plasmid	plasmid:pBIN_2	KS03_RS00255	CDS	49576	50074	499	DoxX family membrane protein	2	C:GO:0016020; C:GO:0016021	C:membrane; C:integral component of membrane	COG2259@1|root,COG2259@2|Bacteria,1N1VA@1224|Proteobacteria,2VU9I@28216|Betaproteobacteria,1K6ZW@119060|Burkholderiaceae	S	DoxX	K15977	K15977; putative oxidoreductase		Others	Unclassified: metabolism	Not Included in Pathway or Brite	PF07681	DoxX
ATCC_33617	plasmid	plasmid:pBIN_2	KS03_RS00260	CDS	50070	50847	778	putative DNA-binding domain-containing protein				COG3219@1|root,COG3219@2|Bacteria,1N2ED@1224|Proteobacteria,2VV6U@28216|Betaproteobacteria,1KH8V@119060|Burkholderiaceae	S	Putative DNA-binding domain							PF09836	Putative DNA-binding domain
ATCC_33617	plasmid	plasmid:pBIN_2	KS03_RS00265	CDS	50830	51733	904	DUF692 domain-containing protein	1	F:GO:0016853	F:isomerase activity	COG3220@1|root,COG3220@2|Bacteria,1MURE@1224|Proteobacteria,2VKD3@28216|Betaproteobacteria,1K0J2@119060|Burkholderiaceae	S	belongs to the UPF0276 family	K09930	K09930; uncharacterized protein		Function unknown	Poorly characterized	Not Included in Pathway or Brite	PF05114	Protein of unknown function (DUF692)
ATCC_33617	plasmid	plasmid:pBIN_2	KS03_RS00270	CDS	51740	51992	253	DUF2282 domain-containing protein	4	P:GO:0022900; F:GO:0009055; F:GO:0020037; F:GO:0046872	P:electron transport chain; F:electron transfer activity; F:heme binding; F:metal ion binding	COG5572@1|root,COG5572@2|Bacteria,1MZ6Q@1224|Proteobacteria,2VWC8@28216|Betaproteobacteria,1K9JZ@119060|Burkholderiaceae	S	Predicted integral membrane protein (DUF2282)							PF10048	Predicted integral membrane protein (DUF2282)
ATCC_33617	plasmid	plasmid:pBIN_2	KS03_RS00275	CDS	52259	52952	694	haloacid dehalogenase type II	1	F:GO:0019120	F:hydrolase activity, acting on acid halide bonds, in C-halide compounds	COG0546@1|root,COG0546@2|Bacteria,1QUWZ@1224|Proteobacteria	S	Haloacid dehalogenase-like hydrolase	K01560	E3.8.1.2; 2-haloacid dehalogenase	[EC:3.8.1.2]	Chloroalkane and chloroalkene degradation	Xenobiotics biodegradation and metabolism	Metabolism	PF13419	Haloacid dehalogenase-like hydrolase
ATCC_33617	plasmid	plasmid:pBIN_2	KS03_RS00275	CDS	52259	52952	694	haloacid dehalogenase type II	1	F:GO:0019120	F:hydrolase activity, acting on acid halide bonds, in C-halide compounds	COG0546@1|root,COG0546@2|Bacteria,1QUWZ@1224|Proteobacteria	S	Haloacid dehalogenase-like hydrolase	K01560	E3.8.1.2; 2-haloacid dehalogenase	[EC:3.8.1.2]	Chlorocyclohexane and chlorobenzene degradation	Xenobiotics biodegradation and metabolism	Metabolism	PF13419	Haloacid dehalogenase-like hydrolase
ATCC_33617	plasmid	plasmid:pBIN_2	KS03_RS00280	CDS	53053	53626	574	TetR/AcrR family transcriptional regulator	1	F:GO:0003677	F:DNA binding	COG1309@1|root,COG1309@2|Bacteria,1PZ8X@1224|Proteobacteria,2W3GU@28216|Betaproteobacteria,1KHE2@119060|Burkholderiaceae	K	Bacterial regulatory proteins, tetR family	K16137	nemR; TetR/AcrR family transcriptional regulator, transcriptional repressor for nem operon		Transcription factors	Protein families: genetic information processing	Brite Hierarchies	PF00440	Bacterial regulatory proteins, tetR family
ATCC_33617	plasmid	plasmid:pBIN_2	KS03_RS00280	CDS	53053	53626	574	TetR/AcrR family transcriptional regulator	1	F:GO:0003677	F:DNA binding	COG1309@1|root,COG1309@2|Bacteria,1PZ8X@1224|Proteobacteria,2W3GU@28216|Betaproteobacteria,1KHE2@119060|Burkholderiaceae	K	Bacterial regulatory proteins, tetR family	K16137	nemR; TetR/AcrR family transcriptional regulator, transcriptional repressor for nem operon		Transcription factors	Protein families: genetic information processing	Brite Hierarchies	PF16925	Tetracyclin repressor-like, C-terminal domain
ATCC_33617	plasmid	plasmid:pBIN_2	KS03_RS00285	CDS	53717	54299	583	carboxymuconolactone decarboxylase family protein	3	P:GO:0098869; F:GO:0004601; F:GO:0051920	P:cellular oxidant detoxification; F:peroxidase activity; F:peroxiredoxin activity	COG2128@1|root,COG2128@2|Bacteria,1RBG0@1224|Proteobacteria,2VKY2@28216|Betaproteobacteria,1K6GI@119060|Burkholderiaceae	O	Antioxidant protein with alkyl hydroperoxidase activity. Required for the reduction of the AhpC active site cysteine residues and for the regeneration of the AhpC enzyme activity							PF02627	Carboxymuconolactone decarboxylase family
ATCC_33617	plasmid	plasmid:pBIN_2	KS03_RS00290	CDS	54372	55158	787	hypothetical protein				2A7RG@1|root,30WQC@2|Bacteria,1PIEI@1224|Proteobacteria,2W727@28216|Betaproteobacteria,1KDKE@119060|Burkholderiaceae	-	-
ATCC_33617	plasmid	plasmid:pBIN_2	KS03_RS00295	CDS	55129	55849	721	TVP38/TMEM64 family protein	3	C:GO:0005886; C:GO:0016020; C:GO:0016021	C:plasma membrane; C:membrane; C:integral component of membrane	COG0398@1|root,COG0398@2|Bacteria	M	Pfam SNARE associated Golgi protein							PF09335	SNARE associated Golgi protein
ATCC_33617	plasmid	plasmid:pBIN_2	KS03_RS00300	CDS	55943	56399	457	hypothetical protein	2	C:GO:0016020; C:GO:0016021	C:membrane; C:integral component of membrane	2C8ZV@1|root,32RN8@2|Bacteria,1N1CN@1224|Proteobacteria	-	-
ATCC_33617	plasmid	plasmid:pBIN_2	KS03_RS00305	CDS	56776	57346	571	sigma-70 family RNA polymerase sigma factor	8	P:GO:0006352; P:GO:0006355; P:GO:0050896; P:GO:2000142; F:GO:0003677; F:GO:0003700; F:GO:0003899; F:GO:0016987	P:DNA-templated transcription, initiation; P:regulation of transcription, DNA-templated; P:response to stimulus; P:regulation of DNA-templated transcription, initiation; F:DNA binding; F:DNA-binding transcription factor activity; F:DNA-directed 5'-3' RNA polymerase activity; F:sigma factor activity	COG1595@1|root,COG1595@2|Bacteria,1MVS7@1224|Proteobacteria,2WA6K@28216|Betaproteobacteria,1K7BY@119060|Burkholderiaceae	K	Sigma-70 region 2							PF08281	Sigma-70, region 4
ATCC_33617	plasmid	plasmid:pBIN_2	KS03_RS00305	CDS	56776	57346	571	sigma-70 family RNA polymerase sigma factor	8	P:GO:0006352; P:GO:0006355; P:GO:0050896; P:GO:2000142; F:GO:0003677; F:GO:0003700; F:GO:0003899; F:GO:0016987	P:DNA-templated transcription, initiation; P:regulation of transcription, DNA-templated; P:response to stimulus; P:regulation of DNA-templated transcription, initiation; F:DNA binding; F:DNA-binding transcription factor activity; F:DNA-directed 5'-3' RNA polymerase activity; F:sigma factor activity	COG1595@1|root,COG1595@2|Bacteria,1MVS7@1224|Proteobacteria,2WA6K@28216|Betaproteobacteria,1K7BY@119060|Burkholderiaceae	K	Sigma-70 region 2							PF04542	Sigma-70 region 2
ATCC_33617	plasmid	plasmid:pBIN_2	KS03_RS00310	CDS	57348	58005	658	NrsF family protein	2	C:GO:0016020; C:GO:0016021	C:membrane; C:integral component of membrane	COG4944@1|root,COG4944@2|Bacteria,1RDJJ@1224|Proteobacteria,2VZFP@28216|Betaproteobacteria,1K3I5@119060|Burkholderiaceae	S	Protein of unknown function (DUF1109)							PF06532	Negative regulator of sigma F
ATCC_33617	plasmid	plasmid:pBIN_2	KS03_RS00315	CDS	58116	58437	322	DUF2282 domain-containing protein				COG5572@1|root,COG5572@2|Bacteria,1PXKZ@1224|Proteobacteria,2WD0B@28216|Betaproteobacteria,1K8X6@119060|Burkholderiaceae	S	Predicted integral membrane protein (DUF2282)							PF10048	Predicted integral membrane protein (DUF2282)
ATCC_33617	plasmid	plasmid:pBIN_2	KS03_RS00320	CDS	58452	59346	895	DUF692 domain-containing protein				COG3220@1|root,COG3220@2|Bacteria,1MURE@1224|Proteobacteria,2VKD3@28216|Betaproteobacteria,1K0J2@119060|Burkholderiaceae	S	belongs to the UPF0276 family	K09930	K09930; uncharacterized protein		Function unknown	Poorly characterized	Not Included in Pathway or Brite	PF05114	Protein of unknown function (DUF692)
ATCC_33617	plasmid	plasmid:pBIN_2	KS03_RS00325	CDS	59329	60115	787	DNA-binding domain-containing protein				COG3219@1|root,COG3219@2|Bacteria,1QAP4@1224|Proteobacteria,2VXJI@28216|Betaproteobacteria,1K4ZZ@119060|Burkholderiaceae	S	Putative DNA-binding domain							PF09836	Putative DNA-binding domain
ATCC_33617	plasmid	plasmid:pBIN_2	KS03_RS00330	CDS	60140	60611	472	DoxX family protein	2	C:GO:0016020; C:GO:0016021	C:membrane; C:integral component of membrane	COG2259@1|root,COG2259@2|Bacteria,1N1VA@1224|Proteobacteria,2W2CW@28216|Betaproteobacteria,1K70T@119060|Burkholderiaceae	S	DoxX	K15977	K15977; putative oxidoreductase		Others	Unclassified: metabolism	Not Included in Pathway or Brite	PF07681	DoxX
ATCC_33617	plasmid	plasmid:pBIN_2	KS03_RS00335	CDS	60718	61159	442	DUF4148 domain-containing protein				2AGF3@1|root,316RE@2|Bacteria,1PXXI@1224|Proteobacteria,2WD89@28216|Betaproteobacteria,1K9P0@119060|Burkholderiaceae	S	Domain of unknown function (DUF4148)							PF13663	Domain of unknown function (DUF4148)
ATCC_33617	plasmid	plasmid:pBIN_2	KS03_RS29120	CDS	61443	61854	412	Hg(II)-responsive transcriptional regulator	5	P:GO:0006355; P:GO:0045893; F:GO:0003677; F:GO:0003700; F:GO:0046872	P:regulation of transcription, DNA-templated; P:positive regulation of transcription, DNA-templated; F:DNA binding; F:DNA-binding transcription factor activity; F:metal ion binding	COG0789@1|root,COG0789@2|Bacteria,1MZ3P@1224|Proteobacteria,2VJ8D@28216|Betaproteobacteria,1K75E@119060|Burkholderiaceae	K	Transcriptional regulator	K08365	merR; MerR family transcriptional regulator, mercuric resistance operon regulatory protein		Transcription factors	Protein families: genetic information processing	Brite Hierarchies	PF09278	MerR, DNA binding
ATCC_33617	plasmid	plasmid:pBIN_2	KS03_RS29120	CDS	61443	61854	412	Hg(II)-responsive transcriptional regulator	5	P:GO:0006355; P:GO:0045893; F:GO:0003677; F:GO:0003700; F:GO:0046872	P:regulation of transcription, DNA-templated; P:positive regulation of transcription, DNA-templated; F:DNA binding; F:DNA-binding transcription factor activity; F:metal ion binding	COG0789@1|root,COG0789@2|Bacteria,1MZ3P@1224|Proteobacteria,2VJ8D@28216|Betaproteobacteria,1K75E@119060|Burkholderiaceae	K	Transcriptional regulator	K08365	merR; MerR family transcriptional regulator, mercuric resistance operon regulatory protein		Transcription factors	Protein families: genetic information processing	Brite Hierarchies	PF00376	MerR family regulatory protein
ATCC_33617	plasmid	plasmid:pBIN_2	KS03_RS00340	CDS	62011	62434	424	organomercurial transporter MerC	4	P:GO:0015694; F:GO:0015097; C:GO:0016020; C:GO:0016021	P:mercury ion transport; F:mercury ion transmembrane transporter activity; C:membrane; C:integral component of membrane	28P0Z@1|root,2ZBXF@2|Bacteria,1RCXF@1224|Proteobacteria,2VQUF@28216|Betaproteobacteria,1K91M@119060|Burkholderiaceae	S	MerC mercury resistance protein	K19058	merC; mercuric ion transport protein		Transporters	Protein families: signaling and cellular processes	Brite Hierarchies	PF03203	MerC mercury resistance protein
ATCC_33617	plasmid	plasmid:pBIN_2	KS03_RS00345	pseudo	62488	63874	1387
ATCC_33617	plasmid	plasmid:pBIN_2	KS03_RS00350	CDS	64215	65907	1693	site-specific integrase	3	P:GO:0006310; P:GO:0015074; F:GO:0003677	P:DNA recombination; P:DNA integration; F:DNA binding	COG0582@1|root,COG0582@2|Bacteria,1QTYJ@1224|Proteobacteria,2WGHX@28216|Betaproteobacteria,1K2IW@119060|Burkholderiaceae	L	Belongs to the 'phage' integrase family							PF00589	Phage integrase family
ATCC_33617	plasmid	plasmid:pBIN_2	KS03_RS00350	CDS	64215	65907	1693	site-specific integrase	3	P:GO:0006310; P:GO:0015074; F:GO:0003677	P:DNA recombination; P:DNA integration; F:DNA binding	COG0582@1|root,COG0582@2|Bacteria,1QTYJ@1224|Proteobacteria,2WGHX@28216|Betaproteobacteria,1K2IW@119060|Burkholderiaceae	L	Belongs to the 'phage' integrase family							PF12482	Phage integrase protein
ATCC_33617	plasmid	plasmid:pBIN_2	KS03_RS00355	CDS	66014	67484	1471	IS66 family transposase				COG3316@1|root,COG3316@2|Bacteria,1RHKZ@1224|Proteobacteria,2WGG1@28216|Betaproteobacteria,1K2RM@119060|Burkholderiaceae	L	transposase							PF13005	zinc-finger binding domain of transposase IS66
ATCC_33617	plasmid	plasmid:pBIN_2	KS03_RS00355	CDS	66014	67484	1471	IS66 family transposase				COG3316@1|root,COG3316@2|Bacteria,1RHKZ@1224|Proteobacteria,2WGG1@28216|Betaproteobacteria,1K2RM@119060|Burkholderiaceae	L	transposase							PF03050	Transposase IS66 family
ATCC_33617	plasmid	plasmid:pBIN_2	KS03_RS00355	CDS	66014	67484	1471	IS66 family transposase				COG3316@1|root,COG3316@2|Bacteria,1RHKZ@1224|Proteobacteria,2WGG1@28216|Betaproteobacteria,1K2RM@119060|Burkholderiaceae	L	transposase							PF13007	Transposase C of IS166 homeodomain
ATCC_33617	plasmid	plasmid:pBIN_2	KS03_RS00360	CDS	67515	67866	352	IS66 family insertion sequence element accessory protein TnpB				COG3436@1|root,COG3436@2|Bacteria,1MZFT@1224|Proteobacteria,2VTME@28216|Betaproteobacteria,1K8AQ@119060|Burkholderiaceae	L	Evidence 2b Function of strongly homologous gene	K07484	K07484; transposase		Replication and repair	Unclassified: genetic information processing	Not Included in Pathway or Brite	PF05717	IS66 Orf2 like protein
ATCC_33617	plasmid	plasmid:pBIN_2	KS03_RS00365	CDS	67841	68318	478	transposase	3	P:GO:0006313; F:GO:0003677; F:GO:0004803	P:transposition, DNA-mediated; F:DNA binding; F:transposase activity	COG2963@1|root,COG2963@2|Bacteria,1N7SX@1224|Proteobacteria,2WFHU@28216|Betaproteobacteria,1KI2D@119060|Burkholderiaceae	L	Transposase	K07483	K07483; transposase		Replication and repair	Unclassified: genetic information processing	Not Included in Pathway or Brite	PF01527	Transposase
ATCC_33617	plasmid	plasmid:pBIN_2	KS03_RS00370	pseudo	68404	68608	205
ATCC_33617	plasmid	plasmid:pBIN_2	KS03_RS00375	CDS	68650	69019	370	hypothetical protein
ATCC_33617	plasmid	plasmid:pBIN_2	KS03_RS00380	CDS	69149	69929	781	hypothetical protein	2	C:GO:0016020; C:GO:0016021	C:membrane; C:integral component of membrane
ATCC_33617	plasmid	plasmid:pBIN_2	KS03_RS31930	CDS	70192	70798	607	hypothetical protein	3	P:GO:0006278; F:GO:0003723; F:GO:0003964	P:RNA-dependent DNA biosynthetic process; F:RNA binding; F:RNA-directed DNA polymerase activity	COG3344@1|root,COG3344@2|Bacteria,2NRZM@2323|unclassified Bacteria	L	Reverse transcriptase (RNA-dependent DNA polymerase)
ATCC_33617	plasmid	plasmid:pBIN_2	KS03_RS00385	CDS	71144	71450	307	helix-turn-helix domain-containing protein	1	F:GO:0003677	F:DNA binding	COG1396@1|root,COG1396@2|Bacteria,1N7QP@1224|Proteobacteria,2WHY7@28216|Betaproteobacteria	K	SMART helix-turn-helix domain protein							PF01381	Helix-turn-helix
ATCC_33617	plasmid	plasmid:pBIN_2	KS03_RS00390	CDS	72330	72540	211	hypothetical protein
ATCC_33617	plasmid	plasmid:pBIN_2	KS03_RS00395	CDS	73176	73488	313	hypothetical protein
ATCC_33617	plasmid	plasmid:pBIN_2	KS03_RS00400	CDS	73614	75456	1843	site-specific integrase	3	P:GO:0006310; P:GO:0015074; F:GO:0003677	P:DNA recombination; P:DNA integration; F:DNA binding	COG4974@1|root,COG4974@2|Bacteria,1R9GT@1224|Proteobacteria,2VPD2@28216|Betaproteobacteria,1K4HA@119060|Burkholderiaceae	L	Belongs to the 'phage' integrase family	K04763	xerD; integrase/recombinase XerD		Chromosome and associated proteins	Protein families: genetic information processing	Brite Hierarchies	PF12482	Phage integrase protein
ATCC_33617	plasmid	plasmid:pBIN_2	KS03_RS00400	CDS	73614	75456	1843	site-specific integrase	3	P:GO:0006310; P:GO:0015074; F:GO:0003677	P:DNA recombination; P:DNA integration; F:DNA binding	COG4974@1|root,COG4974@2|Bacteria,1R9GT@1224|Proteobacteria,2VPD2@28216|Betaproteobacteria,1K4HA@119060|Burkholderiaceae	L	Belongs to the 'phage' integrase family	K04763	xerD; integrase/recombinase XerD		Chromosome and associated proteins	Protein families: genetic information processing	Brite Hierarchies	PF00589	Phage integrase family
ATCC_33617	plasmid	plasmid:pBIN_2	KS03_RS00405	CDS	75452	75833	382	hypothetical protein				2A7VU@1|root,30WVG@2|Bacteria,1PIKC@1224|Proteobacteria,2W76X@28216|Betaproteobacteria,1KDYZ@119060|Burkholderiaceae	-	-
ATCC_33617	plasmid	plasmid:pBIN_2	KS03_RS00410	CDS	75867	76185	319	hypothetical protein
ATCC_33617	plasmid	plasmid:pBIN_2	KS03_RS00415	CDS	76247	76658	412	type II toxin-antitoxin system VapC family toxin	9	P:GO:0035821; P:GO:0090305; P:GO:0090501; F:GO:0000287; F:GO:0004518; F:GO:0004540; F:GO:0016787; F:GO:0046872; F:GO:0090729	P:modulation of process of another organism; P:nucleic acid phosphodiester bond hydrolysis; P:RNA phosphodiester bond hydrolysis; F:magnesium ion binding; F:nuclease activity; F:ribonuclease activity; F:hydrolase activity; F:metal ion binding; F:toxin activity	COG1487@1|root,COG1487@2|Bacteria,1Q93G@1224|Proteobacteria,1SW1A@1236|Gammaproteobacteria	S	PIN domain							PF01850	PIN domain
ATCC_33617	plasmid	plasmid:pBIN_2	KS03_RS00420	CDS	76648	76903	256	antitoxin				COG4118@1|root,COG4118@2|Bacteria,1PBET@1224|Proteobacteria,1SURJ@1236|Gammaproteobacteria,1X1KC@135613|Chromatiales	D	Antitoxin component of a toxin-antitoxin (TA) module
ATCC_33617	plasmid	plasmid:pBIN_2	KS03_RS29130	pseudo	77768	77903	136
ATCC_33617	plasmid	plasmid:pBIN_2	KS03_RS00430	CDS	77953	79191	1239	IS3-like element IS1416 family transposase	2	P:GO:0015074; F:GO:0003676	P:DNA integration; F:nucleic acid binding	COG2801@1|root,COG2801@2|Bacteria,1MVXQ@1224|Proteobacteria,2VHER@28216|Betaproteobacteria,1K13F@119060|Burkholderiaceae	L	Integrase core domain	K07497	K07497; putative transposase		Replication and repair	Unclassified: genetic information processing	Not Included in Pathway or Brite	PF13276	HTH-like domain
ATCC_33617	plasmid	plasmid:pBIN_2	KS03_RS00430	CDS	77953	79191	1239	IS3-like element IS1416 family transposase	2	P:GO:0015074; F:GO:0003676	P:DNA integration; F:nucleic acid binding	COG2801@1|root,COG2801@2|Bacteria,1MVXQ@1224|Proteobacteria,2VHER@28216|Betaproteobacteria,1K13F@119060|Burkholderiaceae	L	Integrase core domain	K07497	K07497; putative transposase		Replication and repair	Unclassified: genetic information processing	Not Included in Pathway or Brite	PF13333	Integrase core domain
ATCC_33617	plasmid	plasmid:pBIN_2	KS03_RS00430	CDS	77953	79191	1239	IS3-like element IS1416 family transposase	2	P:GO:0015074; F:GO:0003676	P:DNA integration; F:nucleic acid binding	COG2801@1|root,COG2801@2|Bacteria,1MVXQ@1224|Proteobacteria,2VHER@28216|Betaproteobacteria,1K13F@119060|Burkholderiaceae	L	Integrase core domain	K07497	K07497; putative transposase		Replication and repair	Unclassified: genetic information processing	Not Included in Pathway or Brite	PF01527	Transposase
ATCC_33617	plasmid	plasmid:pBIN_2	KS03_RS00430	CDS	77953	79191	1239	IS3-like element IS1416 family transposase	2	P:GO:0015074; F:GO:0003676	P:DNA integration; F:nucleic acid binding	COG2801@1|root,COG2801@2|Bacteria,1MVXQ@1224|Proteobacteria,2VHER@28216|Betaproteobacteria,1K13F@119060|Burkholderiaceae	L	Integrase core domain	K07497	K07497; putative transposase		Replication and repair	Unclassified: genetic information processing	Not Included in Pathway or Brite	PF00665	Integrase core domain
ATCC_33617	plasmid	plasmid:pBIN_2	KS03_RS29135	CDS	79300	81148	1849	clostripain-related cysteine peptidase	1	F:GO:0016787	F:hydrolase activity	COG1716@1|root,COG1716@2|Bacteria,1RGIT@1224|Proteobacteria,2W2GU@28216|Betaproteobacteria,1KCBY@119060|Burkholderiaceae	T	Clostripain family							PF03415	Clostripain family
ATCC_33617	plasmid	plasmid:pBIN_2	KS03_RS30710	CDS	81243	82731	1489	hypothetical protein
ATCC_33617	plasmid	plasmid:pBIN_2	KS03_RS29140	CDS	83429	84235	807	IS5 family transposase				COG3293@1|root,COG3293@2|Bacteria,1REUV@1224|Proteobacteria,1SD2K@1236|Gammaproteobacteria	L	COG3293 Transposase and inactivated derivatives							PF01609	Transposase DDE domain
ATCC_33617	plasmid	plasmid:pBIN_2	KS03_RS29140	CDS	83429	84235	807	IS5 family transposase				COG3293@1|root,COG3293@2|Bacteria,1REUV@1224|Proteobacteria,1SD2K@1236|Gammaproteobacteria	L	COG3293 Transposase and inactivated derivatives							PF13340	Putative transposase of IS4/5 family (DUF4096)
ATCC_33617	plasmid	plasmid:pBIN_2	KS03_RS29145	pseudo	84272	85076	805
ATCC_33617	plasmid	plasmid:pBIN_2	KS03_RS29150	CDS	85245	86028	784	response regulator	5	P:GO:0000160; P:GO:0006355; F:GO:0003677; F:GO:0003700; F:GO:0043565	P:phosphorelay signal transduction system; P:regulation of transcription, DNA-templated; F:DNA binding; F:DNA-binding transcription factor activity; F:sequence-specific DNA binding	COG0745@1|root,COG2207@1|root,COG0745@2|Bacteria,COG2207@2|Bacteria,1R3WE@1224|Proteobacteria,2WI4D@28216|Betaproteobacteria,1KG9C@119060|Burkholderiaceae	K	helix_turn_helix, arabinose operon control protein							PF12833	Helix-turn-helix domain
ATCC_33617	plasmid	plasmid:pBIN_2	KS03_RS29150	CDS	85245	86028	784	response regulator	5	P:GO:0000160; P:GO:0006355; F:GO:0003677; F:GO:0003700; F:GO:0043565	P:phosphorelay signal transduction system; P:regulation of transcription, DNA-templated; F:DNA binding; F:DNA-binding transcription factor activity; F:sequence-specific DNA binding	COG0745@1|root,COG2207@1|root,COG0745@2|Bacteria,COG2207@2|Bacteria,1R3WE@1224|Proteobacteria,2WI4D@28216|Betaproteobacteria,1KG9C@119060|Burkholderiaceae	K	helix_turn_helix, arabinose operon control protein							PF00072	Response regulator receiver domain
ATCC_33617	plasmid	plasmid:pBIN_2	KS03_RS00455	CDS	86247	87027	781	response regulator	5	P:GO:0000160; P:GO:0006355; F:GO:0003677; F:GO:0003700; F:GO:0043565	P:phosphorelay signal transduction system; P:regulation of transcription, DNA-templated; F:DNA binding; F:DNA-binding transcription factor activity; F:sequence-specific DNA binding	COG0745@1|root,COG2207@1|root,COG0745@2|Bacteria,COG2207@2|Bacteria,1R3WE@1224|Proteobacteria,2WI4D@28216|Betaproteobacteria,1KG9C@119060|Burkholderiaceae	K	helix_turn_helix, arabinose operon control protein							PF12833	Helix-turn-helix domain
ATCC_33617	plasmid	plasmid:pBIN_2	KS03_RS00455	CDS	86247	87027	781	response regulator	5	P:GO:0000160; P:GO:0006355; F:GO:0003677; F:GO:0003700; F:GO:0043565	P:phosphorelay signal transduction system; P:regulation of transcription, DNA-templated; F:DNA binding; F:DNA-binding transcription factor activity; F:sequence-specific DNA binding	COG0745@1|root,COG2207@1|root,COG0745@2|Bacteria,COG2207@2|Bacteria,1R3WE@1224|Proteobacteria,2WI4D@28216|Betaproteobacteria,1KG9C@119060|Burkholderiaceae	K	helix_turn_helix, arabinose operon control protein							PF00072	Response regulator receiver domain
ATCC_33617	plasmid	plasmid:pBIN_2	KS03_RS00460	CDS	87176	89711	2536	hybrid sensor histidine kinase/response regulator	10	P:GO:0000160; P:GO:0007165; P:GO:0016310; P:GO:0018106; F:GO:0000155; F:GO:0004673; F:GO:0005524; F:GO:0016772; C:GO:0016020; C:GO:0016021	P:phosphorelay signal transduction system; P:signal transduction; P:phosphorylation; P:peptidyl-histidine phosphorylation; F:phosphorelay sensor kinase activity; F:protein histidine kinase activity; F:ATP binding; F:transferase activity, transferring phosphorus-containing groups; C:membrane; C:integral component of membrane	COG0642@1|root,COG2204@1|root,COG2204@2|Bacteria,COG2205@2|Bacteria,1R791@1224|Proteobacteria,2VNBP@28216|Betaproteobacteria,1K3EG@119060|Burkholderiaceae	T	histidine kinase A domain protein	K20971	ladS; two-component system, sensor histidine kinase LadS		Biofilm formation - Pseudomonas aeruginosa	Cellular community - prokaryotes	Cellular Processes	PF00512	His Kinase A (phospho-acceptor) domain
ATCC_33617	plasmid	plasmid:pBIN_2	KS03_RS00460	CDS	87176	89711	2536	hybrid sensor histidine kinase/response regulator	10	P:GO:0000160; P:GO:0007165; P:GO:0016310; P:GO:0018106; F:GO:0000155; F:GO:0004673; F:GO:0005524; F:GO:0016772; C:GO:0016020; C:GO:0016021	P:phosphorelay signal transduction system; P:signal transduction; P:phosphorylation; P:peptidyl-histidine phosphorylation; F:phosphorelay sensor kinase activity; F:protein histidine kinase activity; F:ATP binding; F:transferase activity, transferring phosphorus-containing groups; C:membrane; C:integral component of membrane	COG0642@1|root,COG2204@1|root,COG2204@2|Bacteria,COG2205@2|Bacteria,1R791@1224|Proteobacteria,2VNBP@28216|Betaproteobacteria,1K3EG@119060|Burkholderiaceae	T	histidine kinase A domain protein	K20971	ladS; two-component system, sensor histidine kinase LadS		Biofilm formation - Pseudomonas aeruginosa	Cellular community - prokaryotes	Cellular Processes	PF00072	Response regulator receiver domain
ATCC_33617	plasmid	plasmid:pBIN_2	KS03_RS00460	CDS	87176	89711	2536	hybrid sensor histidine kinase/response regulator	10	P:GO:0000160; P:GO:0007165; P:GO:0016310; P:GO:0018106; F:GO:0000155; F:GO:0004673; F:GO:0005524; F:GO:0016772; C:GO:0016020; C:GO:0016021	P:phosphorelay signal transduction system; P:signal transduction; P:phosphorylation; P:peptidyl-histidine phosphorylation; F:phosphorelay sensor kinase activity; F:protein histidine kinase activity; F:ATP binding; F:transferase activity, transferring phosphorus-containing groups; C:membrane; C:integral component of membrane	COG0642@1|root,COG2204@1|root,COG2204@2|Bacteria,COG2205@2|Bacteria,1R791@1224|Proteobacteria,2VNBP@28216|Betaproteobacteria,1K3EG@119060|Burkholderiaceae	T	histidine kinase A domain protein	K20971	ladS; two-component system, sensor histidine kinase LadS		Biofilm formation - Pseudomonas aeruginosa	Cellular community - prokaryotes	Cellular Processes	PF07696	7TMR-DISM extracellular 2
ATCC_33617	plasmid	plasmid:pBIN_2	KS03_RS00460	CDS	87176	89711	2536	hybrid sensor histidine kinase/response regulator	10	P:GO:0000160; P:GO:0007165; P:GO:0016310; P:GO:0018106; F:GO:0000155; F:GO:0004673; F:GO:0005524; F:GO:0016772; C:GO:0016020; C:GO:0016021	P:phosphorelay signal transduction system; P:signal transduction; P:phosphorylation; P:peptidyl-histidine phosphorylation; F:phosphorelay sensor kinase activity; F:protein histidine kinase activity; F:ATP binding; F:transferase activity, transferring phosphorus-containing groups; C:membrane; C:integral component of membrane	COG0642@1|root,COG2204@1|root,COG2204@2|Bacteria,COG2205@2|Bacteria,1R791@1224|Proteobacteria,2VNBP@28216|Betaproteobacteria,1K3EG@119060|Burkholderiaceae	T	histidine kinase A domain protein	K20971	ladS; two-component system, sensor histidine kinase LadS		Biofilm formation - Pseudomonas aeruginosa	Cellular community - prokaryotes	Cellular Processes	PF02518	Histidine kinase-, DNA gyrase B-, and HSP90-like ATPase
ATCC_33617	plasmid	plasmid:pBIN_2	KS03_RS00460	CDS	87176	89711	2536	hybrid sensor histidine kinase/response regulator	10	P:GO:0000160; P:GO:0007165; P:GO:0016310; P:GO:0018106; F:GO:0000155; F:GO:0004673; F:GO:0005524; F:GO:0016772; C:GO:0016020; C:GO:0016021	P:phosphorelay signal transduction system; P:signal transduction; P:phosphorylation; P:peptidyl-histidine phosphorylation; F:phosphorelay sensor kinase activity; F:protein histidine kinase activity; F:ATP binding; F:transferase activity, transferring phosphorus-containing groups; C:membrane; C:integral component of membrane	COG0642@1|root,COG2204@1|root,COG2204@2|Bacteria,COG2205@2|Bacteria,1R791@1224|Proteobacteria,2VNBP@28216|Betaproteobacteria,1K3EG@119060|Burkholderiaceae	T	histidine kinase A domain protein	K20971	ladS; two-component system, sensor histidine kinase LadS		Biofilm formation - Pseudomonas aeruginosa	Cellular community - prokaryotes	Cellular Processes	PF07695	7TM diverse intracellular signalling
ATCC_33617	plasmid	plasmid:pBIN_2	KS03_RS00460	CDS	87176	89711	2536	hybrid sensor histidine kinase/response regulator	10	P:GO:0000160; P:GO:0007165; P:GO:0016310; P:GO:0018106; F:GO:0000155; F:GO:0004673; F:GO:0005524; F:GO:0016772; C:GO:0016020; C:GO:0016021	P:phosphorelay signal transduction system; P:signal transduction; P:phosphorylation; P:peptidyl-histidine phosphorylation; F:phosphorelay sensor kinase activity; F:protein histidine kinase activity; F:ATP binding; F:transferase activity, transferring phosphorus-containing groups; C:membrane; C:integral component of membrane	COG0642@1|root,COG2204@1|root,COG2204@2|Bacteria,COG2205@2|Bacteria,1R791@1224|Proteobacteria,2VNBP@28216|Betaproteobacteria,1K3EG@119060|Burkholderiaceae	T	histidine kinase A domain protein	K20971	ladS; two-component system, sensor histidine kinase LadS		Protein kinases	Protein families: metabolism	Brite Hierarchies	PF00512	His Kinase A (phospho-acceptor) domain
ATCC_33617	plasmid	plasmid:pBIN_2	KS03_RS00460	CDS	87176	89711	2536	hybrid sensor histidine kinase/response regulator	10	P:GO:0000160; P:GO:0007165; P:GO:0016310; P:GO:0018106; F:GO:0000155; F:GO:0004673; F:GO:0005524; F:GO:0016772; C:GO:0016020; C:GO:0016021	P:phosphorelay signal transduction system; P:signal transduction; P:phosphorylation; P:peptidyl-histidine phosphorylation; F:phosphorelay sensor kinase activity; F:protein histidine kinase activity; F:ATP binding; F:transferase activity, transferring phosphorus-containing groups; C:membrane; C:integral component of membrane	COG0642@1|root,COG2204@1|root,COG2204@2|Bacteria,COG2205@2|Bacteria,1R791@1224|Proteobacteria,2VNBP@28216|Betaproteobacteria,1K3EG@119060|Burkholderiaceae	T	histidine kinase A domain protein	K20971	ladS; two-component system, sensor histidine kinase LadS		Protein kinases	Protein families: metabolism	Brite Hierarchies	PF00072	Response regulator receiver domain
ATCC_33617	plasmid	plasmid:pBIN_2	KS03_RS00460	CDS	87176	89711	2536	hybrid sensor histidine kinase/response regulator	10	P:GO:0000160; P:GO:0007165; P:GO:0016310; P:GO:0018106; F:GO:0000155; F:GO:0004673; F:GO:0005524; F:GO:0016772; C:GO:0016020; C:GO:0016021	P:phosphorelay signal transduction system; P:signal transduction; P:phosphorylation; P:peptidyl-histidine phosphorylation; F:phosphorelay sensor kinase activity; F:protein histidine kinase activity; F:ATP binding; F:transferase activity, transferring phosphorus-containing groups; C:membrane; C:integral component of membrane	COG0642@1|root,COG2204@1|root,COG2204@2|Bacteria,COG2205@2|Bacteria,1R791@1224|Proteobacteria,2VNBP@28216|Betaproteobacteria,1K3EG@119060|Burkholderiaceae	T	histidine kinase A domain protein	K20971	ladS; two-component system, sensor histidine kinase LadS		Protein kinases	Protein families: metabolism	Brite Hierarchies	PF07696	7TMR-DISM extracellular 2
ATCC_33617	plasmid	plasmid:pBIN_2	KS03_RS00460	CDS	87176	89711	2536	hybrid sensor histidine kinase/response regulator	10	P:GO:0000160; P:GO:0007165; P:GO:0016310; P:GO:0018106; F:GO:0000155; F:GO:0004673; F:GO:0005524; F:GO:0016772; C:GO:0016020; C:GO:0016021	P:phosphorelay signal transduction system; P:signal transduction; P:phosphorylation; P:peptidyl-histidine phosphorylation; F:phosphorelay sensor kinase activity; F:protein histidine kinase activity; F:ATP binding; F:transferase activity, transferring phosphorus-containing groups; C:membrane; C:integral component of membrane	COG0642@1|root,COG2204@1|root,COG2204@2|Bacteria,COG2205@2|Bacteria,1R791@1224|Proteobacteria,2VNBP@28216|Betaproteobacteria,1K3EG@119060|Burkholderiaceae	T	histidine kinase A domain protein	K20971	ladS; two-component system, sensor histidine kinase LadS		Protein kinases	Protein families: metabolism	Brite Hierarchies	PF02518	Histidine kinase-, DNA gyrase B-, and HSP90-like ATPase
ATCC_33617	plasmid	plasmid:pBIN_2	KS03_RS00460	CDS	87176	89711	2536	hybrid sensor histidine kinase/response regulator	10	P:GO:0000160; P:GO:0007165; P:GO:0016310; P:GO:0018106; F:GO:0000155; F:GO:0004673; F:GO:0005524; F:GO:0016772; C:GO:0016020; C:GO:0016021	P:phosphorelay signal transduction system; P:signal transduction; P:phosphorylation; P:peptidyl-histidine phosphorylation; F:phosphorelay sensor kinase activity; F:protein histidine kinase activity; F:ATP binding; F:transferase activity, transferring phosphorus-containing groups; C:membrane; C:integral component of membrane	COG0642@1|root,COG2204@1|root,COG2204@2|Bacteria,COG2205@2|Bacteria,1R791@1224|Proteobacteria,2VNBP@28216|Betaproteobacteria,1K3EG@119060|Burkholderiaceae	T	histidine kinase A domain protein	K20971	ladS; two-component system, sensor histidine kinase LadS		Protein kinases	Protein families: metabolism	Brite Hierarchies	PF07695	7TM diverse intracellular signalling
ATCC_33617	plasmid	plasmid:pBIN_2	KS03_RS00460	CDS	87176	89711	2536	hybrid sensor histidine kinase/response regulator	10	P:GO:0000160; P:GO:0007165; P:GO:0016310; P:GO:0018106; F:GO:0000155; F:GO:0004673; F:GO:0005524; F:GO:0016772; C:GO:0016020; C:GO:0016021	P:phosphorelay signal transduction system; P:signal transduction; P:phosphorylation; P:peptidyl-histidine phosphorylation; F:phosphorelay sensor kinase activity; F:protein histidine kinase activity; F:ATP binding; F:transferase activity, transferring phosphorus-containing groups; C:membrane; C:integral component of membrane	COG0642@1|root,COG2204@1|root,COG2204@2|Bacteria,COG2205@2|Bacteria,1R791@1224|Proteobacteria,2VNBP@28216|Betaproteobacteria,1K3EG@119060|Burkholderiaceae	T	histidine kinase A domain protein	K20971	ladS; two-component system, sensor histidine kinase LadS		Two-component system	Protein families: signaling and cellular processes	Brite Hierarchies	PF00512	His Kinase A (phospho-acceptor) domain
ATCC_33617	plasmid	plasmid:pBIN_2	KS03_RS00460	CDS	87176	89711	2536	hybrid sensor histidine kinase/response regulator	10	P:GO:0000160; P:GO:0007165; P:GO:0016310; P:GO:0018106; F:GO:0000155; F:GO:0004673; F:GO:0005524; F:GO:0016772; C:GO:0016020; C:GO:0016021	P:phosphorelay signal transduction system; P:signal transduction; P:phosphorylation; P:peptidyl-histidine phosphorylation; F:phosphorelay sensor kinase activity; F:protein histidine kinase activity; F:ATP binding; F:transferase activity, transferring phosphorus-containing groups; C:membrane; C:integral component of membrane	COG0642@1|root,COG2204@1|root,COG2204@2|Bacteria,COG2205@2|Bacteria,1R791@1224|Proteobacteria,2VNBP@28216|Betaproteobacteria,1K3EG@119060|Burkholderiaceae	T	histidine kinase A domain protein	K20971	ladS; two-component system, sensor histidine kinase LadS		Two-component system	Protein families: signaling and cellular processes	Brite Hierarchies	PF00072	Response regulator receiver domain
ATCC_33617	plasmid	plasmid:pBIN_2	KS03_RS00460	CDS	87176	89711	2536	hybrid sensor histidine kinase/response regulator	10	P:GO:0000160; P:GO:0007165; P:GO:0016310; P:GO:0018106; F:GO:0000155; F:GO:0004673; F:GO:0005524; F:GO:0016772; C:GO:0016020; C:GO:0016021	P:phosphorelay signal transduction system; P:signal transduction; P:phosphorylation; P:peptidyl-histidine phosphorylation; F:phosphorelay sensor kinase activity; F:protein histidine kinase activity; F:ATP binding; F:transferase activity, transferring phosphorus-containing groups; C:membrane; C:integral component of membrane	COG0642@1|root,COG2204@1|root,COG2204@2|Bacteria,COG2205@2|Bacteria,1R791@1224|Proteobacteria,2VNBP@28216|Betaproteobacteria,1K3EG@119060|Burkholderiaceae	T	histidine kinase A domain protein	K20971	ladS; two-component system, sensor histidine kinase LadS		Two-component system	Protein families: signaling and cellular processes	Brite Hierarchies	PF07696	7TMR-DISM extracellular 2
ATCC_33617	plasmid	plasmid:pBIN_2	KS03_RS00460	CDS	87176	89711	2536	hybrid sensor histidine kinase/response regulator	10	P:GO:0000160; P:GO:0007165; P:GO:0016310; P:GO:0018106; F:GO:0000155; F:GO:0004673; F:GO:0005524; F:GO:0016772; C:GO:0016020; C:GO:0016021	P:phosphorelay signal transduction system; P:signal transduction; P:phosphorylation; P:peptidyl-histidine phosphorylation; F:phosphorelay sensor kinase activity; F:protein histidine kinase activity; F:ATP binding; F:transferase activity, transferring phosphorus-containing groups; C:membrane; C:integral component of membrane	COG0642@1|root,COG2204@1|root,COG2204@2|Bacteria,COG2205@2|Bacteria,1R791@1224|Proteobacteria,2VNBP@28216|Betaproteobacteria,1K3EG@119060|Burkholderiaceae	T	histidine kinase A domain protein	K20971	ladS; two-component system, sensor histidine kinase LadS		Two-component system	Protein families: signaling and cellular processes	Brite Hierarchies	PF02518	Histidine kinase-, DNA gyrase B-, and HSP90-like ATPase
ATCC_33617	plasmid	plasmid:pBIN_2	KS03_RS00460	CDS	87176	89711	2536	hybrid sensor histidine kinase/response regulator	10	P:GO:0000160; P:GO:0007165; P:GO:0016310; P:GO:0018106; F:GO:0000155; F:GO:0004673; F:GO:0005524; F:GO:0016772; C:GO:0016020; C:GO:0016021	P:phosphorelay signal transduction system; P:signal transduction; P:phosphorylation; P:peptidyl-histidine phosphorylation; F:phosphorelay sensor kinase activity; F:protein histidine kinase activity; F:ATP binding; F:transferase activity, transferring phosphorus-containing groups; C:membrane; C:integral component of membrane	COG0642@1|root,COG2204@1|root,COG2204@2|Bacteria,COG2205@2|Bacteria,1R791@1224|Proteobacteria,2VNBP@28216|Betaproteobacteria,1K3EG@119060|Burkholderiaceae	T	histidine kinase A domain protein	K20971	ladS; two-component system, sensor histidine kinase LadS		Two-component system	Protein families: signaling and cellular processes	Brite Hierarchies	PF07695	7TM diverse intracellular signalling
ATCC_33617	plasmid	plasmid:pBIN_2	KS03_RS29155	pseudo	89742	90075	334
ATCC_33617	plasmid	plasmid:pBIN_2	KS03_RS00465	CDS	90101	91658	1558	IS66 family transposase				COG3316@1|root,COG3316@2|Bacteria,1RHKZ@1224|Proteobacteria,2WGG1@28216|Betaproteobacteria,1K2RM@119060|Burkholderiaceae	L	transposase	K07484	K07484; transposase		Replication and repair	Unclassified: genetic information processing	Not Included in Pathway or Brite	PF13007	Transposase C of IS166 homeodomain
ATCC_33617	plasmid	plasmid:pBIN_2	KS03_RS00465	CDS	90101	91658	1558	IS66 family transposase				COG3316@1|root,COG3316@2|Bacteria,1RHKZ@1224|Proteobacteria,2WGG1@28216|Betaproteobacteria,1K2RM@119060|Burkholderiaceae	L	transposase	K07484	K07484; transposase		Replication and repair	Unclassified: genetic information processing	Not Included in Pathway or Brite	PF13817	IS66 C-terminal element
ATCC_33617	plasmid	plasmid:pBIN_2	KS03_RS00465	CDS	90101	91658	1558	IS66 family transposase				COG3316@1|root,COG3316@2|Bacteria,1RHKZ@1224|Proteobacteria,2WGG1@28216|Betaproteobacteria,1K2RM@119060|Burkholderiaceae	L	transposase	K07484	K07484; transposase		Replication and repair	Unclassified: genetic information processing	Not Included in Pathway or Brite	PF03050	Transposase IS66 family
ATCC_33617	plasmid	plasmid:pBIN_2	KS03_RS00465	CDS	90101	91658	1558	IS66 family transposase				COG3316@1|root,COG3316@2|Bacteria,1RHKZ@1224|Proteobacteria,2WGG1@28216|Betaproteobacteria,1K2RM@119060|Burkholderiaceae	L	transposase	K07484	K07484; transposase		Replication and repair	Unclassified: genetic information processing	Not Included in Pathway or Brite	PF13005	zinc-finger binding domain of transposase IS66
ATCC_33617	plasmid	plasmid:pBIN_2	KS03_RS00470	CDS	91689	92040	352	IS66 family insertion sequence element accessory protein TnpB				COG3436@1|root,COG3436@2|Bacteria,1MZFT@1224|Proteobacteria,2VTME@28216|Betaproteobacteria,1K8AQ@119060|Burkholderiaceae	L	Evidence 2b Function of strongly homologous gene	K07484	K07484; transposase		Replication and repair	Unclassified: genetic information processing	Not Included in Pathway or Brite	PF05717	IS66 Orf2 like protein
ATCC_33617	plasmid	plasmid:pBIN_2	KS03_RS00475	CDS	92015	92492	478	transposase	3	P:GO:0006313; F:GO:0003677; F:GO:0004803	P:transposition, DNA-mediated; F:DNA binding; F:transposase activity	COG2963@1|root,COG2963@2|Bacteria,1N7SX@1224|Proteobacteria,2WFHU@28216|Betaproteobacteria,1KI2D@119060|Burkholderiaceae	L	Transposase	K07483	K07483; transposase		Replication and repair	Unclassified: genetic information processing	Not Included in Pathway or Brite	PF01527	Transposase
ATCC_33617	plasmid	plasmid:pBIN_2	KS03_RS32510	CDS	92993	93494	502	GGDEF domain-containing protein	2	C:GO:0016020; C:GO:0016021	C:membrane; C:integral component of membrane	COG2199@1|root,COG2199@2|Bacteria,1R49V@1224|Proteobacteria,2TTDC@28211|Alphaproteobacteria,2KCM8@204457|Sphingomonadales	T	diguanylate cyclase							PF00990	Diguanylate cyclase, GGDEF domain
ATCC_33617	plasmid	plasmid:pBIN_2	KS03_RS29165	pseudo	93621	94348	728
ATCC_33617	plasmid	plasmid:pBIN_2	KS03_RS00490	CDS	94363	94762	400	nuclear transport factor 2 family protein				COG3631@1|root,COG3631@2|Bacteria,1NVCX@1224|Proteobacteria,2W2B6@28216|Betaproteobacteria,1K7E1@119060|Burkholderiaceae	S	SnoaL-like domain							PF12680	SnoaL-like domain
ATCC_33617	plasmid	plasmid:pBIN_2	KS03_RS00495	CDS	94843	95785	943	LysR substrate-binding domain-containing protein	2	P:GO:0006355; F:GO:0003700	P:regulation of transcription, DNA-templated; F:DNA-binding transcription factor activity	COG0583@1|root,COG0583@2|Bacteria,1R509@1224|Proteobacteria,2WEX3@28216|Betaproteobacteria,1K50H@119060|Burkholderiaceae	K	regulatory protein LysR	K03566	gcvA; LysR family transcriptional regulator, glycine cleavage system transcriptional activator		Biofilm formation - Escherichia coli	Cellular community - prokaryotes	Cellular Processes	PF00126	Bacterial regulatory helix-turn-helix protein, lysR family
ATCC_33617	plasmid	plasmid:pBIN_2	KS03_RS00495	CDS	94843	95785	943	LysR substrate-binding domain-containing protein	2	P:GO:0006355; F:GO:0003700	P:regulation of transcription, DNA-templated; F:DNA-binding transcription factor activity	COG0583@1|root,COG0583@2|Bacteria,1R509@1224|Proteobacteria,2WEX3@28216|Betaproteobacteria,1K50H@119060|Burkholderiaceae	K	regulatory protein LysR	K03566	gcvA; LysR family transcriptional regulator, glycine cleavage system transcriptional activator		Biofilm formation - Escherichia coli	Cellular community - prokaryotes	Cellular Processes	PF03466	LysR substrate binding domain
ATCC_33617	plasmid	plasmid:pBIN_2	KS03_RS00495	CDS	94843	95785	943	LysR substrate-binding domain-containing protein	2	P:GO:0006355; F:GO:0003700	P:regulation of transcription, DNA-templated; F:DNA-binding transcription factor activity	COG0583@1|root,COG0583@2|Bacteria,1R509@1224|Proteobacteria,2WEX3@28216|Betaproteobacteria,1K50H@119060|Burkholderiaceae	K	regulatory protein LysR	K03566	gcvA; LysR family transcriptional regulator, glycine cleavage system transcriptional activator		Transcription factors	Protein families: genetic information processing	Brite Hierarchies	PF00126	Bacterial regulatory helix-turn-helix protein, lysR family
ATCC_33617	plasmid	plasmid:pBIN_2	KS03_RS00495	CDS	94843	95785	943	LysR substrate-binding domain-containing protein	2	P:GO:0006355; F:GO:0003700	P:regulation of transcription, DNA-templated; F:DNA-binding transcription factor activity	COG0583@1|root,COG0583@2|Bacteria,1R509@1224|Proteobacteria,2WEX3@28216|Betaproteobacteria,1K50H@119060|Burkholderiaceae	K	regulatory protein LysR	K03566	gcvA; LysR family transcriptional regulator, glycine cleavage system transcriptional activator		Transcription factors	Protein families: genetic information processing	Brite Hierarchies	PF03466	LysR substrate binding domain
ATCC_33617	plasmid	plasmid:pBIN_2	KS03_RS32515	CDS	95787	96000	214	hypothetical protein	3	P:GO:0006310; P:GO:0015074; F:GO:0003677	P:DNA recombination; P:DNA integration; F:DNA binding
ATCC_33617	plasmid	plasmid:pBIN_2	KS03_RS00505	CDS	96415	97282	868	IS21-like element ISBcen28 family helper ATPase IstB	1	F:GO:0005524	F:ATP binding	COG1484@1|root,COG1484@2|Bacteria,1MWQX@1224|Proteobacteria,2VMBN@28216|Betaproteobacteria,1K27P@119060|Burkholderiaceae	L	PFAM IstB domain protein ATP-binding protein							PF01695	IstB-like ATP binding protein
ATCC_33617	plasmid	plasmid:pBIN_2	KS03_RS00510	CDS	97278	98535	1258	IS21 family transposase	5	P:GO:0006310; P:GO:0015074; P:GO:0032196; F:GO:0003676; F:GO:0003677	P:DNA recombination; P:DNA integration; P:transposition; F:nucleic acid binding; F:DNA binding	COG4584@1|root,COG4584@2|Bacteria,1MWIV@1224|Proteobacteria,2VJJ7@28216|Betaproteobacteria,1K2F0@119060|Burkholderiaceae	L	Integrase core domain							PF00665	Integrase core domain
ATCC_33617	plasmid	plasmid:pBIN_2	KS03_RS00510	CDS	97278	98535	1258	IS21 family transposase	5	P:GO:0006310; P:GO:0015074; P:GO:0032196; F:GO:0003676; F:GO:0003677	P:DNA recombination; P:DNA integration; P:transposition; F:nucleic acid binding; F:DNA binding	COG4584@1|root,COG4584@2|Bacteria,1MWIV@1224|Proteobacteria,2VJJ7@28216|Betaproteobacteria,1K2F0@119060|Burkholderiaceae	L	Integrase core domain							PF13936	Helix-turn-helix domain
ATCC_33617	plasmid	plasmid:pBIN_2	KS03_RS00520	CDS	99083	100322	1240	FAD-dependent monooxygenase	7	F:GO:0004497; F:GO:0016491; F:GO:0018658; F:GO:0018669; F:GO:0071949; C:GO:0016020; C:GO:0016021	F:monooxygenase activity; F:oxidoreductase activity; F:salicylate 1-monooxygenase activity; F:3-hydroxybenzoate 6-monooxygenase activity; F:FAD binding; C:membrane; C:integral component of membrane	COG0654@1|root,COG0654@2|Bacteria,1R7KI@1224|Proteobacteria,2TV6E@28211|Alphaproteobacteria	CH	FAD binding domain							PF01494	FAD binding domain
ATCC_33617	plasmid	plasmid:pBIN_2	KS03_RS00530	CDS	101049	101901	853	helix-turn-helix transcriptional regulator	3	P:GO:0006355; F:GO:0003700; F:GO:0043565	P:regulation of transcription, DNA-templated; F:DNA-binding transcription factor activity; F:sequence-specific DNA binding	2CYFT@1|root,2S436@2759|Eukaryota	K	helix_turn_helix, arabinose operon control protein							PF12833	Helix-turn-helix domain
ATCC_33617	plasmid	plasmid:pBIN_2	KS03_RS00530	CDS	101049	101901	853	helix-turn-helix transcriptional regulator	3	P:GO:0006355; F:GO:0003700; F:GO:0043565	P:regulation of transcription, DNA-templated; F:DNA-binding transcription factor activity; F:sequence-specific DNA binding	2CYFT@1|root,2S436@2759|Eukaryota	K	helix_turn_helix, arabinose operon control protein							PF02311	AraC-like ligand binding domain
ATCC_33617	plasmid	plasmid:pBIN_2	KS03_RS00535	CDS	102127	102547	421	hypothetical protein				2E554@1|root,32ZY2@2|Bacteria,1N94W@1224|Proteobacteria,1SCEV@1236|Gammaproteobacteria	-	-
ATCC_33617	plasmid	plasmid:pBIN_2	KS03_RS00540	pseudo	102656	103019	364
ATCC_33617	plasmid	plasmid:pBIN_2	KS03_RS00550	CDS	103113	104318	1206	IS3-like element IS1417 family transposase	5	P:GO:0006313; P:GO:0015074; F:GO:0003676; F:GO:0003677; F:GO:0004803	P:transposition, DNA-mediated; P:DNA integration; F:nucleic acid binding; F:DNA binding; F:transposase activity	COG2801@1|root,COG2963@1|root,COG2801@2|Bacteria,COG2963@2|Bacteria,1MY62@1224|Proteobacteria,2VJAF@28216|Betaproteobacteria,1K2XD@119060|Burkholderiaceae	L	transposase	K07497	K07497; putative transposase		Replication and repair	Unclassified: genetic information processing	Not Included in Pathway or Brite	PF01527	Transposase
ATCC_33617	plasmid	plasmid:pBIN_2	KS03_RS00550	CDS	103113	104318	1206	IS3-like element IS1417 family transposase	5	P:GO:0006313; P:GO:0015074; F:GO:0003676; F:GO:0003677; F:GO:0004803	P:transposition, DNA-mediated; P:DNA integration; F:nucleic acid binding; F:DNA binding; F:transposase activity	COG2801@1|root,COG2963@1|root,COG2801@2|Bacteria,COG2963@2|Bacteria,1MY62@1224|Proteobacteria,2VJAF@28216|Betaproteobacteria,1K2XD@119060|Burkholderiaceae	L	transposase	K07497	K07497; putative transposase		Replication and repair	Unclassified: genetic information processing	Not Included in Pathway or Brite	PF00665	Integrase core domain
ATCC_33617	plasmid	plasmid:pBIN_2	KS03_RS00550	CDS	103113	104318	1206	IS3-like element IS1417 family transposase	5	P:GO:0006313; P:GO:0015074; F:GO:0003676; F:GO:0003677; F:GO:0004803	P:transposition, DNA-mediated; P:DNA integration; F:nucleic acid binding; F:DNA binding; F:transposase activity	COG2801@1|root,COG2963@1|root,COG2801@2|Bacteria,COG2963@2|Bacteria,1MY62@1224|Proteobacteria,2VJAF@28216|Betaproteobacteria,1K2XD@119060|Burkholderiaceae	L	transposase	K07497	K07497; putative transposase		Replication and repair	Unclassified: genetic information processing	Not Included in Pathway or Brite	PF13276	HTH-like domain
ATCC_33617	plasmid	plasmid:pBIN_2	KS03_RS00560	CDS	104426	105664	1239	IS3 family transposase				COG2801@1|root,COG2801@2|Bacteria,1MY62@1224|Proteobacteria,2VJAF@28216|Betaproteobacteria,1K2XD@119060|Burkholderiaceae	L	transposase	K07497	K07497; putative transposase		Replication and repair	Unclassified: genetic information processing	Not Included in Pathway or Brite	PF13683	Integrase core domain
ATCC_33617	plasmid	plasmid:pBIN_2	KS03_RS00560	CDS	104426	105664	1239	IS3 family transposase				COG2801@1|root,COG2801@2|Bacteria,1MY62@1224|Proteobacteria,2VJAF@28216|Betaproteobacteria,1K2XD@119060|Burkholderiaceae	L	transposase	K07497	K07497; putative transposase		Replication and repair	Unclassified: genetic information processing	Not Included in Pathway or Brite	PF01527	Transposase
ATCC_33617	plasmid	plasmid:pBIN_2	KS03_RS00560	CDS	104426	105664	1239	IS3 family transposase				COG2801@1|root,COG2801@2|Bacteria,1MY62@1224|Proteobacteria,2VJAF@28216|Betaproteobacteria,1K2XD@119060|Burkholderiaceae	L	transposase	K07497	K07497; putative transposase		Replication and repair	Unclassified: genetic information processing	Not Included in Pathway or Brite	PF13276	HTH-like domain
ATCC_33617	plasmid	plasmid:pBIN_2	KS03_RS00565	pseudo	105695	105950	256
ATCC_33617	plasmid	plasmid:pBIN_2	KS03_RS00570	CDS	106062	107109	1048	IS481 family transposase	2	P:GO:0015074; F:GO:0003676	P:DNA integration; F:nucleic acid binding	COG2801@1|root,COG2801@2|Bacteria,1MZ45@1224|Proteobacteria,2VNA0@28216|Betaproteobacteria,1K69X@119060|Burkholderiaceae	L	Integrase core domain							PF13551	Winged helix-turn helix
ATCC_33617	plasmid	plasmid:pBIN_2	KS03_RS00570	CDS	106062	107109	1048	IS481 family transposase	2	P:GO:0015074; F:GO:0003676	P:DNA integration; F:nucleic acid binding	COG2801@1|root,COG2801@2|Bacteria,1MZ45@1224|Proteobacteria,2VNA0@28216|Betaproteobacteria,1K69X@119060|Burkholderiaceae	L	Integrase core domain							PF13683	Integrase core domain
ATCC_33617	plasmid	plasmid:pBIN_2	KS03_RS30715	CDS	107821	108016	196	hypothetical protein
ATCC_33617	plasmid	plasmid:pBIN_2	KS03_RS30720	CDS	108085	108388	304	hypothetical protein
ATCC_33617	plasmid	plasmid:pBIN_2	KS03_RS00605	CDS	110451	110742	292	hypothetical protein	3	P:GO:0006310; P:GO:0015074; F:GO:0003677	P:DNA recombination; P:DNA integration; F:DNA binding
ATCC_33617	plasmid	plasmid:pBIN_2	KS03_RS00720	pseudo	139569	139803	235
