# Supplementary material for: Next Generation Sequencing and Comparative Genomic Analysis Reveal Extreme Plasticity of Two Burkholderia glumae Strains HN1 and HN2
Source: Pathogens. 2022 Oct 30;11(11):1265. doi: 10.3390/pathogens11111265 (PMC9698995; doi:10.3390/pathogens11111265)
Supplement: Supplementary file 1 [file pathogens-11-01265-s001.zip › Table S9 The annotation of single copy genes under positive selection.xlsx]

## Sheet: Sheet1
Table S9 The annotation of single copy genes under positive selection
Orthogroup	Description	KO id	KO description	EC	Pathway name	KEGG term2 name	KEGG term1 name	GoId	Go Name Space	Go Name	VFID	VF_Name	VFcategory	Protein ID	Mutant Phenotype	toxoflavin
OG0000148	lactonase family protein	K07404	pgl; 6-phosphogluconolactonase	[EC:3.1.1.31]	Pentose phosphate pathway	Carbohydrate metabolism	Metabolism
OG0000167	MurR/RpiR family transcriptional regulator							GO:0009987	biological_process	cellular process
OG0000167	MurR/RpiR family transcriptional regulator							GO:0032774	biological_process	RNA biosynthetic process
OG0000167	MurR/RpiR family transcriptional regulator							GO:0032787	biological_process	monocarboxylic acid metabolic process
OG0000167	MurR/RpiR family transcriptional regulator							GO:0006163	biological_process	purine nucleotide metabolic process
OG0000167	MurR/RpiR family transcriptional regulator							GO:0019219	biological_process	regulation of nucleobase-containing compound metabolic process
OG0000167	MurR/RpiR family transcriptional regulator							GO:0006165	biological_process	nucleoside diphosphate phosphorylation
OG0000167	MurR/RpiR family transcriptional regulator							GO:1901576	biological_process	organic substance biosynthetic process
OG0000167	MurR/RpiR family transcriptional regulator							GO:0019222	biological_process	regulation of metabolic process
OG0000167	MurR/RpiR family transcriptional regulator							GO:0071704	biological_process	organic substance metabolic process
OG0000167	MurR/RpiR family transcriptional regulator							GO:1901575	biological_process	organic substance catabolic process
OG0000167	MurR/RpiR family transcriptional regulator							GO:0019752	biological_process	carboxylic acid metabolic process
OG0000167	MurR/RpiR family transcriptional regulator							GO:0009259	biological_process	ribonucleotide metabolic process
OG0000167	MurR/RpiR family transcriptional regulator							GO:1901360	biological_process	organic cyclic compound metabolic process
OG0000167	MurR/RpiR family transcriptional regulator							GO:0055086	biological_process	nucleobase-containing small molecule metabolic process
OG0000167	MurR/RpiR family transcriptional regulator							GO:1901362	biological_process	organic cyclic compound biosynthetic process
OG0000167	MurR/RpiR family transcriptional regulator							GO:0051252	biological_process	regulation of RNA metabolic process
OG0000167	MurR/RpiR family transcriptional regulator							GO:0010556	biological_process	regulation of macromolecule biosynthetic process
OG0000167	MurR/RpiR family transcriptional regulator							GO:0006725	biological_process	cellular aromatic compound metabolic process
OG0000167	MurR/RpiR family transcriptional regulator							GO:0072521	biological_process	purine-containing compound metabolic process
OG0000167	MurR/RpiR family transcriptional regulator							GO:0140110	molecular_function	transcription regulator activity
OG0000167	MurR/RpiR family transcriptional regulator							GO:0034641	biological_process	cellular nitrogen compound metabolic process
OG0000167	MurR/RpiR family transcriptional regulator							GO:1901135	biological_process	carbohydrate derivative metabolic process
OG0000167	MurR/RpiR family transcriptional regulator							GO:0110165	cellular_component	cellular anatomical entity
OG0000167	MurR/RpiR family transcriptional regulator							GO:0097367	molecular_function	carbohydrate derivative binding
OG0000167	MurR/RpiR family transcriptional regulator							GO:0005975	biological_process	carbohydrate metabolic process
OG0000167	MurR/RpiR family transcriptional regulator							GO:0003674	molecular_function	molecular_function
OG0000167	MurR/RpiR family transcriptional regulator							GO:0046939	biological_process	nucleotide phosphorylation
OG0000167	MurR/RpiR family transcriptional regulator							GO:0031323	biological_process	regulation of cellular metabolic process
OG0000167	MurR/RpiR family transcriptional regulator							GO:0034654	biological_process	nucleobase-containing compound biosynthetic process
OG0000167	MurR/RpiR family transcriptional regulator							GO:0031326	biological_process	regulation of cellular biosynthetic process
OG0000167	MurR/RpiR family transcriptional regulator							GO:0060255	biological_process	regulation of macromolecule metabolic process
OG0000167	MurR/RpiR family transcriptional regulator							GO:0009056	biological_process	catabolic process
OG0000167	MurR/RpiR family transcriptional regulator							GO:0006753	biological_process	nucleoside phosphate metabolic process
OG0000167	MurR/RpiR family transcriptional regulator							GO:0009058	biological_process	biosynthetic process
OG0000167	MurR/RpiR family transcriptional regulator							GO:0009059	biological_process	macromolecule biosynthetic process
OG0000167	MurR/RpiR family transcriptional regulator							GO:0016740	molecular_function	transferase activity
OG0000167	MurR/RpiR family transcriptional regulator							GO:0006757	biological_process	ATP generation from ADP
OG0000167	MurR/RpiR family transcriptional regulator							GO:0050789	biological_process	regulation of biological process
OG0000167	MurR/RpiR family transcriptional regulator							GO:0050794	biological_process	regulation of cellular process
OG0000167	MurR/RpiR family transcriptional regulator							GO:0005488	molecular_function	binding
OG0000167	MurR/RpiR family transcriptional regulator							GO:0003700	molecular_function	DNA-binding transcription factor activity
OG0000167	MurR/RpiR family transcriptional regulator							GO:0097659	biological_process	nucleic acid-templated transcription
OG0000167	MurR/RpiR family transcriptional regulator							GO:0016772	molecular_function	transferase activity, transferring phosphorus-containing groups
OG0000167	MurR/RpiR family transcriptional regulator							GO:0006793	biological_process	phosphorus metabolic process
OG0000167	MurR/RpiR family transcriptional regulator							GO:0006796	biological_process	phosphate-containing compound metabolic process
OG0000167	MurR/RpiR family transcriptional regulator							GO:1903506	biological_process	regulation of nucleic acid-templated transcription
OG0000167	MurR/RpiR family transcriptional regulator							GO:0046483	biological_process	heterocycle metabolic process
OG0000167	MurR/RpiR family transcriptional regulator							GO:0016020	cellular_component	membrane
OG0000167	MurR/RpiR family transcriptional regulator							GO:0016021	cellular_component	integral component of membrane
OG0000167	MurR/RpiR family transcriptional regulator							GO:0006807	biological_process	nitrogen compound metabolic process
OG0000167	MurR/RpiR family transcriptional regulator							GO:0009117	biological_process	nucleotide metabolic process
OG0000167	MurR/RpiR family transcriptional regulator							GO:0009889	biological_process	regulation of biosynthetic process
OG0000167	MurR/RpiR family transcriptional regulator							GO:0043170	biological_process	macromolecule metabolic process
OG0000167	MurR/RpiR family transcriptional regulator							GO:0043436	biological_process	oxoacid metabolic process
OG0000167	MurR/RpiR family transcriptional regulator							GO:0009132	biological_process	nucleoside diphosphate metabolic process
OG0000167	MurR/RpiR family transcriptional regulator							GO:0016301	molecular_function	kinase activity
OG0000167	MurR/RpiR family transcriptional regulator							GO:0009135	biological_process	purine nucleoside diphosphate metabolic process
OG0000167	MurR/RpiR family transcriptional regulator							GO:0016052	biological_process	carbohydrate catabolic process
OG0000167	MurR/RpiR family transcriptional regulator							GO:0019637	biological_process	organophosphate metabolic process
OG0000167	MurR/RpiR family transcriptional regulator							GO:0009141	biological_process	nucleoside triphosphate metabolic process
OG0000167	MurR/RpiR family transcriptional regulator							GO:0016310	biological_process	phosphorylation
OG0000167	MurR/RpiR family transcriptional regulator							GO:0009144	biological_process	purine nucleoside triphosphate metabolic process
OG0000167	MurR/RpiR family transcriptional regulator							GO:0009150	biological_process	purine ribonucleotide metabolic process
OG0000167	MurR/RpiR family transcriptional regulator							GO:0090304	biological_process	nucleic acid metabolic process
OG0000167	MurR/RpiR family transcriptional regulator							GO:0006082	biological_process	organic acid metabolic process
OG0000167	MurR/RpiR family transcriptional regulator							GO:0016070	biological_process	RNA metabolic process
OG0000167	MurR/RpiR family transcriptional regulator							GO:0005575	cellular_component	cellular_component
OG0000167	MurR/RpiR family transcriptional regulator							GO:0006090	biological_process	pyruvate metabolic process
OG0000167	MurR/RpiR family transcriptional regulator							GO:0006091	biological_process	generation of precursor metabolites and energy
OG0000167	MurR/RpiR family transcriptional regulator							GO:0044237	biological_process	cellular metabolic process
OG0000167	MurR/RpiR family transcriptional regulator							GO:0044238	biological_process	primary metabolic process
OG0000167	MurR/RpiR family transcriptional regulator							GO:0046031	biological_process	ADP metabolic process
OG0000167	MurR/RpiR family transcriptional regulator							GO:0006351	biological_process	DNA-templated transcription
OG0000167	MurR/RpiR family transcriptional regulator							GO:0006096	biological_process	glycolytic process
OG0000167	MurR/RpiR family transcriptional regulator							GO:0046034	biological_process	ATP metabolic process
OG0000167	MurR/RpiR family transcriptional regulator							GO:0018130	biological_process	heterocycle biosynthetic process
OG0000167	MurR/RpiR family transcriptional regulator							GO:0006355	biological_process	regulation of DNA-templated transcription
OG0000167	MurR/RpiR family transcriptional regulator							GO:0008150	biological_process	biological_process
OG0000167	MurR/RpiR family transcriptional regulator							GO:0008152	biological_process	metabolic process
OG0000167	MurR/RpiR family transcriptional regulator							GO:0044249	biological_process	cellular biosynthetic process
OG0000167	MurR/RpiR family transcriptional regulator							GO:0009179	biological_process	purine ribonucleoside diphosphate metabolic process
OG0000167	MurR/RpiR family transcriptional regulator							GO:0080090	biological_process	regulation of primary metabolic process
OG0000167	MurR/RpiR family transcriptional regulator							GO:1901564	biological_process	organonitrogen compound metabolic process
OG0000167	MurR/RpiR family transcriptional regulator							GO:0009185	biological_process	ribonucleoside diphosphate metabolic process
OG0000167	MurR/RpiR family transcriptional regulator							GO:0010467	biological_process	gene expression
OG0000167	MurR/RpiR family transcriptional regulator							GO:0051171	biological_process	regulation of nitrogen compound metabolic process
OG0000167	MurR/RpiR family transcriptional regulator							GO:0010468	biological_process	regulation of gene expression
OG0000167	MurR/RpiR family transcriptional regulator							GO:2001141	biological_process	regulation of RNA biosynthetic process
OG0000167	MurR/RpiR family transcriptional regulator							GO:0019693	biological_process	ribose phosphate metabolic process
OG0000167	MurR/RpiR family transcriptional regulator							GO:0019438	biological_process	aromatic compound biosynthetic process
OG0000167	MurR/RpiR family transcriptional regulator							GO:0009199	biological_process	ribonucleoside triphosphate metabolic process
OG0000167	MurR/RpiR family transcriptional regulator							GO:0044271	biological_process	cellular nitrogen compound biosynthetic process
OG0000167	MurR/RpiR family transcriptional regulator							GO:0065007	biological_process	biological regulation
OG0000167	MurR/RpiR family transcriptional regulator							GO:0003824	molecular_function	catalytic activity
OG0000167	MurR/RpiR family transcriptional regulator							GO:0009205	biological_process	purine ribonucleoside triphosphate metabolic process
OG0000167	MurR/RpiR family transcriptional regulator							GO:0031224	cellular_component	intrinsic component of membrane
OG0000167	MurR/RpiR family transcriptional regulator							GO:0044281	biological_process	small molecule metabolic process
OG0000167	MurR/RpiR family transcriptional regulator							GO:0006139	biological_process	nucleobase-containing compound metabolic process
OG0000266	N-acyl homoserine lactonase family protein							GO:0003824	molecular_function	catalytic activity
OG0000266	N-acyl homoserine lactonase family protein							GO:0016787	molecular_function	hydrolase activity
OG0000266	N-acyl homoserine lactonase family protein							GO:0003674	molecular_function	molecular_function
OG0000270	dihydrolipoyl dehydrogenase	K00382	DLD, lpd, pdhD; dihydrolipoamide dehydrogenase	[EC:1.8.1.4]	Glycolysis / Gluconeogenesis	Carbohydrate metabolism	Metabolism	GO:0043168	molecular_function	anion binding
OG0000270	dihydrolipoyl dehydrogenase	K00382	DLD, lpd, pdhD; dihydrolipoamide dehydrogenase	[EC:1.8.1.4]	Glycolysis / Gluconeogenesis	Carbohydrate metabolism	Metabolism	GO:0042592	biological_process	homeostatic process
OG0000270	dihydrolipoyl dehydrogenase	K00382	DLD, lpd, pdhD; dihydrolipoamide dehydrogenase	[EC:1.8.1.4]	Glycolysis / Gluconeogenesis	Carbohydrate metabolism	Metabolism	GO:0009987	biological_process	cellular process
OG0000270	dihydrolipoyl dehydrogenase	K00382	DLD, lpd, pdhD; dihydrolipoamide dehydrogenase	[EC:1.8.1.4]	Glycolysis / Gluconeogenesis	Carbohydrate metabolism	Metabolism	GO:0050660	molecular_function	flavin adenine dinucleotide binding
OG0000270	dihydrolipoyl dehydrogenase	K00382	DLD, lpd, pdhD; dihydrolipoamide dehydrogenase	[EC:1.8.1.4]	Glycolysis / Gluconeogenesis	Carbohydrate metabolism	Metabolism	GO:0050789	biological_process	regulation of biological process
OG0000270	dihydrolipoyl dehydrogenase	K00382	DLD, lpd, pdhD; dihydrolipoamide dehydrogenase	[EC:1.8.1.4]	Glycolysis / Gluconeogenesis	Carbohydrate metabolism	Metabolism	GO:0000166	molecular_function	nucleotide binding
OG0000270	dihydrolipoyl dehydrogenase	K00382	DLD, lpd, pdhD; dihydrolipoamide dehydrogenase	[EC:1.8.1.4]	Glycolysis / Gluconeogenesis	Carbohydrate metabolism	Metabolism	GO:0097159	molecular_function	organic cyclic compound binding
OG0000270	dihydrolipoyl dehydrogenase	K00382	DLD, lpd, pdhD; dihydrolipoamide dehydrogenase	[EC:1.8.1.4]	Glycolysis / Gluconeogenesis	Carbohydrate metabolism	Metabolism	GO:0050794	biological_process	regulation of cellular process
OG0000270	dihydrolipoyl dehydrogenase	K00382	DLD, lpd, pdhD; dihydrolipoamide dehydrogenase	[EC:1.8.1.4]	Glycolysis / Gluconeogenesis	Carbohydrate metabolism	Metabolism	GO:0016491	molecular_function	oxidoreductase activity
OG0000270	dihydrolipoyl dehydrogenase	K00382	DLD, lpd, pdhD; dihydrolipoamide dehydrogenase	[EC:1.8.1.4]	Glycolysis / Gluconeogenesis	Carbohydrate metabolism	Metabolism	GO:1901265	molecular_function	nucleoside phosphate binding
OG0000270	dihydrolipoyl dehydrogenase	K00382	DLD, lpd, pdhD; dihydrolipoamide dehydrogenase	[EC:1.8.1.4]	Glycolysis / Gluconeogenesis	Carbohydrate metabolism	Metabolism	GO:0019725	biological_process	cellular homeostasis
OG0000270	dihydrolipoyl dehydrogenase	K00382	DLD, lpd, pdhD; dihydrolipoamide dehydrogenase	[EC:1.8.1.4]	Glycolysis / Gluconeogenesis	Carbohydrate metabolism	Metabolism	GO:1901363	molecular_function	heterocyclic compound binding
OG0000270	dihydrolipoyl dehydrogenase	K00382	DLD, lpd, pdhD; dihydrolipoamide dehydrogenase	[EC:1.8.1.4]	Glycolysis / Gluconeogenesis	Carbohydrate metabolism	Metabolism	GO:0045454	biological_process	cell redox homeostasis
OG0000270	dihydrolipoyl dehydrogenase	K00382	DLD, lpd, pdhD; dihydrolipoamide dehydrogenase	[EC:1.8.1.4]	Glycolysis / Gluconeogenesis	Carbohydrate metabolism	Metabolism	GO:0065007	biological_process	biological regulation
OG0000270	dihydrolipoyl dehydrogenase	K00382	DLD, lpd, pdhD; dihydrolipoamide dehydrogenase	[EC:1.8.1.4]	Glycolysis / Gluconeogenesis	Carbohydrate metabolism	Metabolism	GO:0003824	molecular_function	catalytic activity
OG0000270	dihydrolipoyl dehydrogenase	K00382	DLD, lpd, pdhD; dihydrolipoamide dehydrogenase	[EC:1.8.1.4]	Glycolysis / Gluconeogenesis	Carbohydrate metabolism	Metabolism	GO:0005488	molecular_function	binding
OG0000270	dihydrolipoyl dehydrogenase	K00382	DLD, lpd, pdhD; dihydrolipoamide dehydrogenase	[EC:1.8.1.4]	Glycolysis / Gluconeogenesis	Carbohydrate metabolism	Metabolism	GO:0065008	biological_process	regulation of biological quality
OG0000270	dihydrolipoyl dehydrogenase	K00382	DLD, lpd, pdhD; dihydrolipoamide dehydrogenase	[EC:1.8.1.4]	Glycolysis / Gluconeogenesis	Carbohydrate metabolism	Metabolism	GO:0004148	molecular_function	dihydrolipoyl dehydrogenase activity
OG0000270	dihydrolipoyl dehydrogenase	K00382	DLD, lpd, pdhD; dihydrolipoamide dehydrogenase	[EC:1.8.1.4]	Glycolysis / Gluconeogenesis	Carbohydrate metabolism	Metabolism	GO:0008150	biological_process	biological_process
OG0000270	dihydrolipoyl dehydrogenase	K00382	DLD, lpd, pdhD; dihydrolipoamide dehydrogenase	[EC:1.8.1.4]	Glycolysis / Gluconeogenesis	Carbohydrate metabolism	Metabolism	GO:0003674	molecular_function	molecular_function
OG0000270	dihydrolipoyl dehydrogenase	K00382	DLD, lpd, pdhD; dihydrolipoamide dehydrogenase	[EC:1.8.1.4]	Glycolysis / Gluconeogenesis	Carbohydrate metabolism	Metabolism	GO:0016667	molecular_function	oxidoreductase activity, acting on a sulfur group of donors
OG0000270	dihydrolipoyl dehydrogenase	K00382	DLD, lpd, pdhD; dihydrolipoamide dehydrogenase	[EC:1.8.1.4]	Glycolysis / Gluconeogenesis	Carbohydrate metabolism	Metabolism	GO:0016668	molecular_function	oxidoreductase activity, acting on a sulfur group of donors, NAD(P) as acceptor
OG0000270	dihydrolipoyl dehydrogenase	K00382	DLD, lpd, pdhD; dihydrolipoamide dehydrogenase	[EC:1.8.1.4]	Glycolysis / Gluconeogenesis	Carbohydrate metabolism	Metabolism	GO:0036094	molecular_function	small molecule binding
OG0000270	dihydrolipoyl dehydrogenase	K00382	DLD, lpd, pdhD; dihydrolipoamide dehydrogenase	[EC:1.8.1.4]	Glycolysis / Gluconeogenesis	Carbohydrate metabolism	Metabolism	GO:0043167	molecular_function	ion binding
OG0000270	dihydrolipoyl dehydrogenase	K00382	DLD, lpd, pdhD; dihydrolipoamide dehydrogenase	[EC:1.8.1.4]	Citrate cycle (TCA cycle)	Carbohydrate metabolism	Metabolism	GO:0043168	molecular_function	anion binding
OG0000270	dihydrolipoyl dehydrogenase	K00382	DLD, lpd, pdhD; dihydrolipoamide dehydrogenase	[EC:1.8.1.4]	Citrate cycle (TCA cycle)	Carbohydrate metabolism	Metabolism	GO:0042592	biological_process	homeostatic process
OG0000270	dihydrolipoyl dehydrogenase	K00382	DLD, lpd, pdhD; dihydrolipoamide dehydrogenase	[EC:1.8.1.4]	Citrate cycle (TCA cycle)	Carbohydrate metabolism	Metabolism	GO:0009987	biological_process	cellular process
OG0000270	dihydrolipoyl dehydrogenase	K00382	DLD, lpd, pdhD; dihydrolipoamide dehydrogenase	[EC:1.8.1.4]	Citrate cycle (TCA cycle)	Carbohydrate metabolism	Metabolism	GO:0050660	molecular_function	flavin adenine dinucleotide binding
OG0000270	dihydrolipoyl dehydrogenase	K00382	DLD, lpd, pdhD; dihydrolipoamide dehydrogenase	[EC:1.8.1.4]	Citrate cycle (TCA cycle)	Carbohydrate metabolism	Metabolism	GO:0050789	biological_process	regulation of biological process
OG0000270	dihydrolipoyl dehydrogenase	K00382	DLD, lpd, pdhD; dihydrolipoamide dehydrogenase	[EC:1.8.1.4]	Citrate cycle (TCA cycle)	Carbohydrate metabolism	Metabolism	GO:0000166	molecular_function	nucleotide binding
OG0000270	dihydrolipoyl dehydrogenase	K00382	DLD, lpd, pdhD; dihydrolipoamide dehydrogenase	[EC:1.8.1.4]	Citrate cycle (TCA cycle)	Carbohydrate metabolism	Metabolism	GO:0097159	molecular_function	organic cyclic compound binding
OG0000270	dihydrolipoyl dehydrogenase	K00382	DLD, lpd, pdhD; dihydrolipoamide dehydrogenase	[EC:1.8.1.4]	Citrate cycle (TCA cycle)	Carbohydrate metabolism	Metabolism	GO:0050794	biological_process	regulation of cellular process
OG0000270	dihydrolipoyl dehydrogenase	K00382	DLD, lpd, pdhD; dihydrolipoamide dehydrogenase	[EC:1.8.1.4]	Citrate cycle (TCA cycle)	Carbohydrate metabolism	Metabolism	GO:0016491	molecular_function	oxidoreductase activity
OG0000270	dihydrolipoyl dehydrogenase	K00382	DLD, lpd, pdhD; dihydrolipoamide dehydrogenase	[EC:1.8.1.4]	Citrate cycle (TCA cycle)	Carbohydrate metabolism	Metabolism	GO:1901265	molecular_function	nucleoside phosphate binding
OG0000270	dihydrolipoyl dehydrogenase	K00382	DLD, lpd, pdhD; dihydrolipoamide dehydrogenase	[EC:1.8.1.4]	Citrate cycle (TCA cycle)	Carbohydrate metabolism	Metabolism	GO:0019725	biological_process	cellular homeostasis
OG0000270	dihydrolipoyl dehydrogenase	K00382	DLD, lpd, pdhD; dihydrolipoamide dehydrogenase	[EC:1.8.1.4]	Citrate cycle (TCA cycle)	Carbohydrate metabolism	Metabolism	GO:1901363	molecular_function	heterocyclic compound binding
OG0000270	dihydrolipoyl dehydrogenase	K00382	DLD, lpd, pdhD; dihydrolipoamide dehydrogenase	[EC:1.8.1.4]	Citrate cycle (TCA cycle)	Carbohydrate metabolism	Metabolism	GO:0045454	biological_process	cell redox homeostasis
OG0000270	dihydrolipoyl dehydrogenase	K00382	DLD, lpd, pdhD; dihydrolipoamide dehydrogenase	[EC:1.8.1.4]	Citrate cycle (TCA cycle)	Carbohydrate metabolism	Metabolism	GO:0065007	biological_process	biological regulation
OG0000270	dihydrolipoyl dehydrogenase	K00382	DLD, lpd, pdhD; dihydrolipoamide dehydrogenase	[EC:1.8.1.4]	Citrate cycle (TCA cycle)	Carbohydrate metabolism	Metabolism	GO:0003824	molecular_function	catalytic activity
OG0000270	dihydrolipoyl dehydrogenase	K00382	DLD, lpd, pdhD; dihydrolipoamide dehydrogenase	[EC:1.8.1.4]	Citrate cycle (TCA cycle)	Carbohydrate metabolism	Metabolism	GO:0005488	molecular_function	binding
OG0000270	dihydrolipoyl dehydrogenase	K00382	DLD, lpd, pdhD; dihydrolipoamide dehydrogenase	[EC:1.8.1.4]	Citrate cycle (TCA cycle)	Carbohydrate metabolism	Metabolism	GO:0065008	biological_process	regulation of biological quality
OG0000270	dihydrolipoyl dehydrogenase	K00382	DLD, lpd, pdhD; dihydrolipoamide dehydrogenase	[EC:1.8.1.4]	Citrate cycle (TCA cycle)	Carbohydrate metabolism	Metabolism	GO:0004148	molecular_function	dihydrolipoyl dehydrogenase activity
OG0000270	dihydrolipoyl dehydrogenase	K00382	DLD, lpd, pdhD; dihydrolipoamide dehydrogenase	[EC:1.8.1.4]	Citrate cycle (TCA cycle)	Carbohydrate metabolism	Metabolism	GO:0008150	biological_process	biological_process
OG0000270	dihydrolipoyl dehydrogenase	K00382	DLD, lpd, pdhD; dihydrolipoamide dehydrogenase	[EC:1.8.1.4]	Citrate cycle (TCA cycle)	Carbohydrate metabolism	Metabolism	GO:0003674	molecular_function	molecular_function
OG0000270	dihydrolipoyl dehydrogenase	K00382	DLD, lpd, pdhD; dihydrolipoamide dehydrogenase	[EC:1.8.1.4]	Citrate cycle (TCA cycle)	Carbohydrate metabolism	Metabolism	GO:0016667	molecular_function	oxidoreductase activity, acting on a sulfur group of donors
OG0000270	dihydrolipoyl dehydrogenase	K00382	DLD, lpd, pdhD; dihydrolipoamide dehydrogenase	[EC:1.8.1.4]	Citrate cycle (TCA cycle)	Carbohydrate metabolism	Metabolism	GO:0016668	molecular_function	oxidoreductase activity, acting on a sulfur group of donors, NAD(P) as acceptor
OG0000270	dihydrolipoyl dehydrogenase	K00382	DLD, lpd, pdhD; dihydrolipoamide dehydrogenase	[EC:1.8.1.4]	Citrate cycle (TCA cycle)	Carbohydrate metabolism	Metabolism	GO:0036094	molecular_function	small molecule binding
OG0000270	dihydrolipoyl dehydrogenase	K00382	DLD, lpd, pdhD; dihydrolipoamide dehydrogenase	[EC:1.8.1.4]	Citrate cycle (TCA cycle)	Carbohydrate metabolism	Metabolism	GO:0043167	molecular_function	ion binding
OG0000270	dihydrolipoyl dehydrogenase	K00382	DLD, lpd, pdhD; dihydrolipoamide dehydrogenase	[EC:1.8.1.4]	Pyruvate metabolism	Carbohydrate metabolism	Metabolism	GO:0043168	molecular_function	anion binding
OG0000270	dihydrolipoyl dehydrogenase	K00382	DLD, lpd, pdhD; dihydrolipoamide dehydrogenase	[EC:1.8.1.4]	Pyruvate metabolism	Carbohydrate metabolism	Metabolism	GO:0042592	biological_process	homeostatic process
OG0000270	dihydrolipoyl dehydrogenase	K00382	DLD, lpd, pdhD; dihydrolipoamide dehydrogenase	[EC:1.8.1.4]	Pyruvate metabolism	Carbohydrate metabolism	Metabolism	GO:0009987	biological_process	cellular process
OG0000270	dihydrolipoyl dehydrogenase	K00382	DLD, lpd, pdhD; dihydrolipoamide dehydrogenase	[EC:1.8.1.4]	Pyruvate metabolism	Carbohydrate metabolism	Metabolism	GO:0050660	molecular_function	flavin adenine dinucleotide binding
OG0000270	dihydrolipoyl dehydrogenase	K00382	DLD, lpd, pdhD; dihydrolipoamide dehydrogenase	[EC:1.8.1.4]	Pyruvate metabolism	Carbohydrate metabolism	Metabolism	GO:0050789	biological_process	regulation of biological process
OG0000270	dihydrolipoyl dehydrogenase	K00382	DLD, lpd, pdhD; dihydrolipoamide dehydrogenase	[EC:1.8.1.4]	Pyruvate metabolism	Carbohydrate metabolism	Metabolism	GO:0000166	molecular_function	nucleotide binding
OG0000270	dihydrolipoyl dehydrogenase	K00382	DLD, lpd, pdhD; dihydrolipoamide dehydrogenase	[EC:1.8.1.4]	Pyruvate metabolism	Carbohydrate metabolism	Metabolism	GO:0097159	molecular_function	organic cyclic compound binding
OG0000270	dihydrolipoyl dehydrogenase	K00382	DLD, lpd, pdhD; dihydrolipoamide dehydrogenase	[EC:1.8.1.4]	Pyruvate metabolism	Carbohydrate metabolism	Metabolism	GO:0050794	biological_process	regulation of cellular process
OG0000270	dihydrolipoyl dehydrogenase	K00382	DLD, lpd, pdhD; dihydrolipoamide dehydrogenase	[EC:1.8.1.4]	Pyruvate metabolism	Carbohydrate metabolism	Metabolism	GO:0016491	molecular_function	oxidoreductase activity
OG0000270	dihydrolipoyl dehydrogenase	K00382	DLD, lpd, pdhD; dihydrolipoamide dehydrogenase	[EC:1.8.1.4]	Pyruvate metabolism	Carbohydrate metabolism	Metabolism	GO:1901265	molecular_function	nucleoside phosphate binding
OG0000270	dihydrolipoyl dehydrogenase	K00382	DLD, lpd, pdhD; dihydrolipoamide dehydrogenase	[EC:1.8.1.4]	Pyruvate metabolism	Carbohydrate metabolism	Metabolism	GO:0019725	biological_process	cellular homeostasis
OG0000270	dihydrolipoyl dehydrogenase	K00382	DLD, lpd, pdhD; dihydrolipoamide dehydrogenase	[EC:1.8.1.4]	Pyruvate metabolism	Carbohydrate metabolism	Metabolism	GO:1901363	molecular_function	heterocyclic compound binding
OG0000270	dihydrolipoyl dehydrogenase	K00382	DLD, lpd, pdhD; dihydrolipoamide dehydrogenase	[EC:1.8.1.4]	Pyruvate metabolism	Carbohydrate metabolism	Metabolism	GO:0045454	biological_process	cell redox homeostasis
OG0000270	dihydrolipoyl dehydrogenase	K00382	DLD, lpd, pdhD; dihydrolipoamide dehydrogenase	[EC:1.8.1.4]	Pyruvate metabolism	Carbohydrate metabolism	Metabolism	GO:0065007	biological_process	biological regulation
OG0000270	dihydrolipoyl dehydrogenase	K00382	DLD, lpd, pdhD; dihydrolipoamide dehydrogenase	[EC:1.8.1.4]	Pyruvate metabolism	Carbohydrate metabolism	Metabolism	GO:0003824	molecular_function	catalytic activity
OG0000270	dihydrolipoyl dehydrogenase	K00382	DLD, lpd, pdhD; dihydrolipoamide dehydrogenase	[EC:1.8.1.4]	Pyruvate metabolism	Carbohydrate metabolism	Metabolism	GO:0005488	molecular_function	binding
OG0000270	dihydrolipoyl dehydrogenase	K00382	DLD, lpd, pdhD; dihydrolipoamide dehydrogenase	[EC:1.8.1.4]	Pyruvate metabolism	Carbohydrate metabolism	Metabolism	GO:0065008	biological_process	regulation of biological quality
OG0000270	dihydrolipoyl dehydrogenase	K00382	DLD, lpd, pdhD; dihydrolipoamide dehydrogenase	[EC:1.8.1.4]	Pyruvate metabolism	Carbohydrate metabolism	Metabolism	GO:0004148	molecular_function	dihydrolipoyl dehydrogenase activity
OG0000270	dihydrolipoyl dehydrogenase	K00382	DLD, lpd, pdhD; dihydrolipoamide dehydrogenase	[EC:1.8.1.4]	Pyruvate metabolism	Carbohydrate metabolism	Metabolism	GO:0008150	biological_process	biological_process
OG0000270	dihydrolipoyl dehydrogenase	K00382	DLD, lpd, pdhD; dihydrolipoamide dehydrogenase	[EC:1.8.1.4]	Pyruvate metabolism	Carbohydrate metabolism	Metabolism	GO:0003674	molecular_function	molecular_function
OG0000270	dihydrolipoyl dehydrogenase	K00382	DLD, lpd, pdhD; dihydrolipoamide dehydrogenase	[EC:1.8.1.4]	Pyruvate metabolism	Carbohydrate metabolism	Metabolism	GO:0016667	molecular_function	oxidoreductase activity, acting on a sulfur group of donors
OG0000270	dihydrolipoyl dehydrogenase	K00382	DLD, lpd, pdhD; dihydrolipoamide dehydrogenase	[EC:1.8.1.4]	Pyruvate metabolism	Carbohydrate metabolism	Metabolism	GO:0016668	molecular_function	oxidoreductase activity, acting on a sulfur group of donors, NAD(P) as acceptor
OG0000270	dihydrolipoyl dehydrogenase	K00382	DLD, lpd, pdhD; dihydrolipoamide dehydrogenase	[EC:1.8.1.4]	Pyruvate metabolism	Carbohydrate metabolism	Metabolism	GO:0036094	molecular_function	small molecule binding
OG0000270	dihydrolipoyl dehydrogenase	K00382	DLD, lpd, pdhD; dihydrolipoamide dehydrogenase	[EC:1.8.1.4]	Pyruvate metabolism	Carbohydrate metabolism	Metabolism	GO:0043167	molecular_function	ion binding
OG0000270	dihydrolipoyl dehydrogenase	K00382	DLD, lpd, pdhD; dihydrolipoamide dehydrogenase	[EC:1.8.1.4]	Glyoxylate and dicarboxylate metabolism	Carbohydrate metabolism	Metabolism	GO:0043168	molecular_function	anion binding
OG0000270	dihydrolipoyl dehydrogenase	K00382	DLD, lpd, pdhD; dihydrolipoamide dehydrogenase	[EC:1.8.1.4]	Glyoxylate and dicarboxylate metabolism	Carbohydrate metabolism	Metabolism	GO:0042592	biological_process	homeostatic process
OG0000270	dihydrolipoyl dehydrogenase	K00382	DLD, lpd, pdhD; dihydrolipoamide dehydrogenase	[EC:1.8.1.4]	Glyoxylate and dicarboxylate metabolism	Carbohydrate metabolism	Metabolism	GO:0009987	biological_process	cellular process
OG0000270	dihydrolipoyl dehydrogenase	K00382	DLD, lpd, pdhD; dihydrolipoamide dehydrogenase	[EC:1.8.1.4]	Glyoxylate and dicarboxylate metabolism	Carbohydrate metabolism	Metabolism	GO:0050660	molecular_function	flavin adenine dinucleotide binding
OG0000270	dihydrolipoyl dehydrogenase	K00382	DLD, lpd, pdhD; dihydrolipoamide dehydrogenase	[EC:1.8.1.4]	Glyoxylate and dicarboxylate metabolism	Carbohydrate metabolism	Metabolism	GO:0050789	biological_process	regulation of biological process
OG0000270	dihydrolipoyl dehydrogenase	K00382	DLD, lpd, pdhD; dihydrolipoamide dehydrogenase	[EC:1.8.1.4]	Glyoxylate and dicarboxylate metabolism	Carbohydrate metabolism	Metabolism	GO:0000166	molecular_function	nucleotide binding
OG0000270	dihydrolipoyl dehydrogenase	K00382	DLD, lpd, pdhD; dihydrolipoamide dehydrogenase	[EC:1.8.1.4]	Glyoxylate and dicarboxylate metabolism	Carbohydrate metabolism	Metabolism	GO:0097159	molecular_function	organic cyclic compound binding
OG0000270	dihydrolipoyl dehydrogenase	K00382	DLD, lpd, pdhD; dihydrolipoamide dehydrogenase	[EC:1.8.1.4]	Glyoxylate and dicarboxylate metabolism	Carbohydrate metabolism	Metabolism	GO:0050794	biological_process	regulation of cellular process
OG0000270	dihydrolipoyl dehydrogenase	K00382	DLD, lpd, pdhD; dihydrolipoamide dehydrogenase	[EC:1.8.1.4]	Glyoxylate and dicarboxylate metabolism	Carbohydrate metabolism	Metabolism	GO:0016491	molecular_function	oxidoreductase activity
OG0000270	dihydrolipoyl dehydrogenase	K00382	DLD, lpd, pdhD; dihydrolipoamide dehydrogenase	[EC:1.8.1.4]	Glyoxylate and dicarboxylate metabolism	Carbohydrate metabolism	Metabolism	GO:1901265	molecular_function	nucleoside phosphate binding
OG0000270	dihydrolipoyl dehydrogenase	K00382	DLD, lpd, pdhD; dihydrolipoamide dehydrogenase	[EC:1.8.1.4]	Glyoxylate and dicarboxylate metabolism	Carbohydrate metabolism	Metabolism	GO:0019725	biological_process	cellular homeostasis
OG0000270	dihydrolipoyl dehydrogenase	K00382	DLD, lpd, pdhD; dihydrolipoamide dehydrogenase	[EC:1.8.1.4]	Glyoxylate and dicarboxylate metabolism	Carbohydrate metabolism	Metabolism	GO:1901363	molecular_function	heterocyclic compound binding
OG0000270	dihydrolipoyl dehydrogenase	K00382	DLD, lpd, pdhD; dihydrolipoamide dehydrogenase	[EC:1.8.1.4]	Glyoxylate and dicarboxylate metabolism	Carbohydrate metabolism	Metabolism	GO:0045454	biological_process	cell redox homeostasis
OG0000270	dihydrolipoyl dehydrogenase	K00382	DLD, lpd, pdhD; dihydrolipoamide dehydrogenase	[EC:1.8.1.4]	Glyoxylate and dicarboxylate metabolism	Carbohydrate metabolism	Metabolism	GO:0065007	biological_process	biological regulation
OG0000270	dihydrolipoyl dehydrogenase	K00382	DLD, lpd, pdhD; dihydrolipoamide dehydrogenase	[EC:1.8.1.4]	Glyoxylate and dicarboxylate metabolism	Carbohydrate metabolism	Metabolism	GO:0003824	molecular_function	catalytic activity
OG0000270	dihydrolipoyl dehydrogenase	K00382	DLD, lpd, pdhD; dihydrolipoamide dehydrogenase	[EC:1.8.1.4]	Glyoxylate and dicarboxylate metabolism	Carbohydrate metabolism	Metabolism	GO:0005488	molecular_function	binding
OG0000270	dihydrolipoyl dehydrogenase	K00382	DLD, lpd, pdhD; dihydrolipoamide dehydrogenase	[EC:1.8.1.4]	Glyoxylate and dicarboxylate metabolism	Carbohydrate metabolism	Metabolism	GO:0065008	biological_process	regulation of biological quality
OG0000270	dihydrolipoyl dehydrogenase	K00382	DLD, lpd, pdhD; dihydrolipoamide dehydrogenase	[EC:1.8.1.4]	Glyoxylate and dicarboxylate metabolism	Carbohydrate metabolism	Metabolism	GO:0004148	molecular_function	dihydrolipoyl dehydrogenase activity
OG0000270	dihydrolipoyl dehydrogenase	K00382	DLD, lpd, pdhD; dihydrolipoamide dehydrogenase	[EC:1.8.1.4]	Glyoxylate and dicarboxylate metabolism	Carbohydrate metabolism	Metabolism	GO:0008150	biological_process	biological_process
OG0000270	dihydrolipoyl dehydrogenase	K00382	DLD, lpd, pdhD; dihydrolipoamide dehydrogenase	[EC:1.8.1.4]	Glyoxylate and dicarboxylate metabolism	Carbohydrate metabolism	Metabolism	GO:0003674	molecular_function	molecular_function
OG0000270	dihydrolipoyl dehydrogenase	K00382	DLD, lpd, pdhD; dihydrolipoamide dehydrogenase	[EC:1.8.1.4]	Glyoxylate and dicarboxylate metabolism	Carbohydrate metabolism	Metabolism	GO:0016667	molecular_function	oxidoreductase activity, acting on a sulfur group of donors
OG0000270	dihydrolipoyl dehydrogenase	K00382	DLD, lpd, pdhD; dihydrolipoamide dehydrogenase	[EC:1.8.1.4]	Glyoxylate and dicarboxylate metabolism	Carbohydrate metabolism	Metabolism	GO:0016668	molecular_function	oxidoreductase activity, acting on a sulfur group of donors, NAD(P) as acceptor
OG0000270	dihydrolipoyl dehydrogenase	K00382	DLD, lpd, pdhD; dihydrolipoamide dehydrogenase	[EC:1.8.1.4]	Glyoxylate and dicarboxylate metabolism	Carbohydrate metabolism	Metabolism	GO:0036094	molecular_function	small molecule binding
OG0000270	dihydrolipoyl dehydrogenase	K00382	DLD, lpd, pdhD; dihydrolipoamide dehydrogenase	[EC:1.8.1.4]	Glyoxylate and dicarboxylate metabolism	Carbohydrate metabolism	Metabolism	GO:0043167	molecular_function	ion binding
OG0000270	dihydrolipoyl dehydrogenase	K00382	DLD, lpd, pdhD; dihydrolipoamide dehydrogenase	[EC:1.8.1.4]	Propanoate metabolism	Carbohydrate metabolism	Metabolism	GO:0043168	molecular_function	anion binding
OG0000270	dihydrolipoyl dehydrogenase	K00382	DLD, lpd, pdhD; dihydrolipoamide dehydrogenase	[EC:1.8.1.4]	Propanoate metabolism	Carbohydrate metabolism	Metabolism	GO:0042592	biological_process	homeostatic process
OG0000270	dihydrolipoyl dehydrogenase	K00382	DLD, lpd, pdhD; dihydrolipoamide dehydrogenase	[EC:1.8.1.4]	Propanoate metabolism	Carbohydrate metabolism	Metabolism	GO:0009987	biological_process	cellular process
OG0000270	dihydrolipoyl dehydrogenase	K00382	DLD, lpd, pdhD; dihydrolipoamide dehydrogenase	[EC:1.8.1.4]	Propanoate metabolism	Carbohydrate metabolism	Metabolism	GO:0050660	molecular_function	flavin adenine dinucleotide binding
OG0000270	dihydrolipoyl dehydrogenase	K00382	DLD, lpd, pdhD; dihydrolipoamide dehydrogenase	[EC:1.8.1.4]	Propanoate metabolism	Carbohydrate metabolism	Metabolism	GO:0050789	biological_process	regulation of biological process
OG0000270	dihydrolipoyl dehydrogenase	K00382	DLD, lpd, pdhD; dihydrolipoamide dehydrogenase	[EC:1.8.1.4]	Propanoate metabolism	Carbohydrate metabolism	Metabolism	GO:0000166	molecular_function	nucleotide binding
OG0000270	dihydrolipoyl dehydrogenase	K00382	DLD, lpd, pdhD; dihydrolipoamide dehydrogenase	[EC:1.8.1.4]	Propanoate metabolism	Carbohydrate metabolism	Metabolism	GO:0097159	molecular_function	organic cyclic compound binding
OG0000270	dihydrolipoyl dehydrogenase	K00382	DLD, lpd, pdhD; dihydrolipoamide dehydrogenase	[EC:1.8.1.4]	Propanoate metabolism	Carbohydrate metabolism	Metabolism	GO:0050794	biological_process	regulation of cellular process
OG0000270	dihydrolipoyl dehydrogenase	K00382	DLD, lpd, pdhD; dihydrolipoamide dehydrogenase	[EC:1.8.1.4]	Propanoate metabolism	Carbohydrate metabolism	Metabolism	GO:0016491	molecular_function	oxidoreductase activity
OG0000270	dihydrolipoyl dehydrogenase	K00382	DLD, lpd, pdhD; dihydrolipoamide dehydrogenase	[EC:1.8.1.4]	Propanoate metabolism	Carbohydrate metabolism	Metabolism	GO:1901265	molecular_function	nucleoside phosphate binding
OG0000270	dihydrolipoyl dehydrogenase	K00382	DLD, lpd, pdhD; dihydrolipoamide dehydrogenase	[EC:1.8.1.4]	Propanoate metabolism	Carbohydrate metabolism	Metabolism	GO:0019725	biological_process	cellular homeostasis
OG0000270	dihydrolipoyl dehydrogenase	K00382	DLD, lpd, pdhD; dihydrolipoamide dehydrogenase	[EC:1.8.1.4]	Propanoate metabolism	Carbohydrate metabolism	Metabolism	GO:1901363	molecular_function	heterocyclic compound binding
OG0000270	dihydrolipoyl dehydrogenase	K00382	DLD, lpd, pdhD; dihydrolipoamide dehydrogenase	[EC:1.8.1.4]	Propanoate metabolism	Carbohydrate metabolism	Metabolism	GO:0045454	biological_process	cell redox homeostasis
OG0000270	dihydrolipoyl dehydrogenase	K00382	DLD, lpd, pdhD; dihydrolipoamide dehydrogenase	[EC:1.8.1.4]	Propanoate metabolism	Carbohydrate metabolism	Metabolism	GO:0065007	biological_process	biological regulation
OG0000270	dihydrolipoyl dehydrogenase	K00382	DLD, lpd, pdhD; dihydrolipoamide dehydrogenase	[EC:1.8.1.4]	Propanoate metabolism	Carbohydrate metabolism	Metabolism	GO:0003824	molecular_function	catalytic activity
OG0000270	dihydrolipoyl dehydrogenase	K00382	DLD, lpd, pdhD; dihydrolipoamide dehydrogenase	[EC:1.8.1.4]	Propanoate metabolism	Carbohydrate metabolism	Metabolism	GO:0005488	molecular_function	binding
OG0000270	dihydrolipoyl dehydrogenase	K00382	DLD, lpd, pdhD; dihydrolipoamide dehydrogenase	[EC:1.8.1.4]	Propanoate metabolism	Carbohydrate metabolism	Metabolism	GO:0065008	biological_process	regulation of biological quality
OG0000270	dihydrolipoyl dehydrogenase	K00382	DLD, lpd, pdhD; dihydrolipoamide dehydrogenase	[EC:1.8.1.4]	Propanoate metabolism	Carbohydrate metabolism	Metabolism	GO:0004148	molecular_function	dihydrolipoyl dehydrogenase activity
OG0000270	dihydrolipoyl dehydrogenase	K00382	DLD, lpd, pdhD; dihydrolipoamide dehydrogenase	[EC:1.8.1.4]	Propanoate metabolism	Carbohydrate metabolism	Metabolism	GO:0008150	biological_process	biological_process
OG0000270	dihydrolipoyl dehydrogenase	K00382	DLD, lpd, pdhD; dihydrolipoamide dehydrogenase	[EC:1.8.1.4]	Propanoate metabolism	Carbohydrate metabolism	Metabolism	GO:0003674	molecular_function	molecular_function
OG0000270	dihydrolipoyl dehydrogenase	K00382	DLD, lpd, pdhD; dihydrolipoamide dehydrogenase	[EC:1.8.1.4]	Propanoate metabolism	Carbohydrate metabolism	Metabolism	GO:0016667	molecular_function	oxidoreductase activity, acting on a sulfur group of donors
OG0000270	dihydrolipoyl dehydrogenase	K00382	DLD, lpd, pdhD; dihydrolipoamide dehydrogenase	[EC:1.8.1.4]	Propanoate metabolism	Carbohydrate metabolism	Metabolism	GO:0016668	molecular_function	oxidoreductase activity, acting on a sulfur group of donors, NAD(P) as acceptor
OG0000270	dihydrolipoyl dehydrogenase	K00382	DLD, lpd, pdhD; dihydrolipoamide dehydrogenase	[EC:1.8.1.4]	Propanoate metabolism	Carbohydrate metabolism	Metabolism	GO:0036094	molecular_function	small molecule binding
OG0000270	dihydrolipoyl dehydrogenase	K00382	DLD, lpd, pdhD; dihydrolipoamide dehydrogenase	[EC:1.8.1.4]	Propanoate metabolism	Carbohydrate metabolism	Metabolism	GO:0043167	molecular_function	ion binding
OG0000270	dihydrolipoyl dehydrogenase	K00382	DLD, lpd, pdhD; dihydrolipoamide dehydrogenase	[EC:1.8.1.4]	Glycine, serine and threonine metabolism	Amino acid metabolism	Metabolism	GO:0043168	molecular_function	anion binding
OG0000270	dihydrolipoyl dehydrogenase	K00382	DLD, lpd, pdhD; dihydrolipoamide dehydrogenase	[EC:1.8.1.4]	Glycine, serine and threonine metabolism	Amino acid metabolism	Metabolism	GO:0042592	biological_process	homeostatic process
OG0000270	dihydrolipoyl dehydrogenase	K00382	DLD, lpd, pdhD; dihydrolipoamide dehydrogenase	[EC:1.8.1.4]	Glycine, serine and threonine metabolism	Amino acid metabolism	Metabolism	GO:0009987	biological_process	cellular process
OG0000270	dihydrolipoyl dehydrogenase	K00382	DLD, lpd, pdhD; dihydrolipoamide dehydrogenase	[EC:1.8.1.4]	Glycine, serine and threonine metabolism	Amino acid metabolism	Metabolism	GO:0050660	molecular_function	flavin adenine dinucleotide binding
OG0000270	dihydrolipoyl dehydrogenase	K00382	DLD, lpd, pdhD; dihydrolipoamide dehydrogenase	[EC:1.8.1.4]	Glycine, serine and threonine metabolism	Amino acid metabolism	Metabolism	GO:0050789	biological_process	regulation of biological process
OG0000270	dihydrolipoyl dehydrogenase	K00382	DLD, lpd, pdhD; dihydrolipoamide dehydrogenase	[EC:1.8.1.4]	Glycine, serine and threonine metabolism	Amino acid metabolism	Metabolism	GO:0000166	molecular_function	nucleotide binding
OG0000270	dihydrolipoyl dehydrogenase	K00382	DLD, lpd, pdhD; dihydrolipoamide dehydrogenase	[EC:1.8.1.4]	Glycine, serine and threonine metabolism	Amino acid metabolism	Metabolism	GO:0097159	molecular_function	organic cyclic compound binding
OG0000270	dihydrolipoyl dehydrogenase	K00382	DLD, lpd, pdhD; dihydrolipoamide dehydrogenase	[EC:1.8.1.4]	Glycine, serine and threonine metabolism	Amino acid metabolism	Metabolism	GO:0050794	biological_process	regulation of cellular process
OG0000270	dihydrolipoyl dehydrogenase	K00382	DLD, lpd, pdhD; dihydrolipoamide dehydrogenase	[EC:1.8.1.4]	Glycine, serine and threonine metabolism	Amino acid metabolism	Metabolism	GO:0016491	molecular_function	oxidoreductase activity
OG0000270	dihydrolipoyl dehydrogenase	K00382	DLD, lpd, pdhD; dihydrolipoamide dehydrogenase	[EC:1.8.1.4]	Glycine, serine and threonine metabolism	Amino acid metabolism	Metabolism	GO:1901265	molecular_function	nucleoside phosphate binding
OG0000270	dihydrolipoyl dehydrogenase	K00382	DLD, lpd, pdhD; dihydrolipoamide dehydrogenase	[EC:1.8.1.4]	Glycine, serine and threonine metabolism	Amino acid metabolism	Metabolism	GO:0019725	biological_process	cellular homeostasis
OG0000270	dihydrolipoyl dehydrogenase	K00382	DLD, lpd, pdhD; dihydrolipoamide dehydrogenase	[EC:1.8.1.4]	Glycine, serine and threonine metabolism	Amino acid metabolism	Metabolism	GO:1901363	molecular_function	heterocyclic compound binding
OG0000270	dihydrolipoyl dehydrogenase	K00382	DLD, lpd, pdhD; dihydrolipoamide dehydrogenase	[EC:1.8.1.4]	Glycine, serine and threonine metabolism	Amino acid metabolism	Metabolism	GO:0045454	biological_process	cell redox homeostasis
OG0000270	dihydrolipoyl dehydrogenase	K00382	DLD, lpd, pdhD; dihydrolipoamide dehydrogenase	[EC:1.8.1.4]	Glycine, serine and threonine metabolism	Amino acid metabolism	Metabolism	GO:0065007	biological_process	biological regulation
OG0000270	dihydrolipoyl dehydrogenase	K00382	DLD, lpd, pdhD; dihydrolipoamide dehydrogenase	[EC:1.8.1.4]	Glycine, serine and threonine metabolism	Amino acid metabolism	Metabolism	GO:0003824	molecular_function	catalytic activity
OG0000270	dihydrolipoyl dehydrogenase	K00382	DLD, lpd, pdhD; dihydrolipoamide dehydrogenase	[EC:1.8.1.4]	Glycine, serine and threonine metabolism	Amino acid metabolism	Metabolism	GO:0005488	molecular_function	binding
OG0000270	dihydrolipoyl dehydrogenase	K00382	DLD, lpd, pdhD; dihydrolipoamide dehydrogenase	[EC:1.8.1.4]	Glycine, serine and threonine metabolism	Amino acid metabolism	Metabolism	GO:0065008	biological_process	regulation of biological quality
OG0000270	dihydrolipoyl dehydrogenase	K00382	DLD, lpd, pdhD; dihydrolipoamide dehydrogenase	[EC:1.8.1.4]	Glycine, serine and threonine metabolism	Amino acid metabolism	Metabolism	GO:0004148	molecular_function	dihydrolipoyl dehydrogenase activity
OG0000270	dihydrolipoyl dehydrogenase	K00382	DLD, lpd, pdhD; dihydrolipoamide dehydrogenase	[EC:1.8.1.4]	Glycine, serine and threonine metabolism	Amino acid metabolism	Metabolism	GO:0008150	biological_process	biological_process
OG0000270	dihydrolipoyl dehydrogenase	K00382	DLD, lpd, pdhD; dihydrolipoamide dehydrogenase	[EC:1.8.1.4]	Glycine, serine and threonine metabolism	Amino acid metabolism	Metabolism	GO:0003674	molecular_function	molecular_function
OG0000270	dihydrolipoyl dehydrogenase	K00382	DLD, lpd, pdhD; dihydrolipoamide dehydrogenase	[EC:1.8.1.4]	Glycine, serine and threonine metabolism	Amino acid metabolism	Metabolism	GO:0016667	molecular_function	oxidoreductase activity, acting on a sulfur group of donors
OG0000270	dihydrolipoyl dehydrogenase	K00382	DLD, lpd, pdhD; dihydrolipoamide dehydrogenase	[EC:1.8.1.4]	Glycine, serine and threonine metabolism	Amino acid metabolism	Metabolism	GO:0016668	molecular_function	oxidoreductase activity, acting on a sulfur group of donors, NAD(P) as acceptor
OG0000270	dihydrolipoyl dehydrogenase	K00382	DLD, lpd, pdhD; dihydrolipoamide dehydrogenase	[EC:1.8.1.4]	Glycine, serine and threonine metabolism	Amino acid metabolism	Metabolism	GO:0036094	molecular_function	small molecule binding
OG0000270	dihydrolipoyl dehydrogenase	K00382	DLD, lpd, pdhD; dihydrolipoamide dehydrogenase	[EC:1.8.1.4]	Glycine, serine and threonine metabolism	Amino acid metabolism	Metabolism	GO:0043167	molecular_function	ion binding
OG0000270	dihydrolipoyl dehydrogenase	K00382	DLD, lpd, pdhD; dihydrolipoamide dehydrogenase	[EC:1.8.1.4]	Valine, leucine and isoleucine degradation	Amino acid metabolism	Metabolism	GO:0043168	molecular_function	anion binding
OG0000270	dihydrolipoyl dehydrogenase	K00382	DLD, lpd, pdhD; dihydrolipoamide dehydrogenase	[EC:1.8.1.4]	Valine, leucine and isoleucine degradation	Amino acid metabolism	Metabolism	GO:0042592	biological_process	homeostatic process
OG0000270	dihydrolipoyl dehydrogenase	K00382	DLD, lpd, pdhD; dihydrolipoamide dehydrogenase	[EC:1.8.1.4]	Valine, leucine and isoleucine degradation	Amino acid metabolism	Metabolism	GO:0009987	biological_process	cellular process
OG0000270	dihydrolipoyl dehydrogenase	K00382	DLD, lpd, pdhD; dihydrolipoamide dehydrogenase	[EC:1.8.1.4]	Valine, leucine and isoleucine degradation	Amino acid metabolism	Metabolism	GO:0050660	molecular_function	flavin adenine dinucleotide binding
OG0000270	dihydrolipoyl dehydrogenase	K00382	DLD, lpd, pdhD; dihydrolipoamide dehydrogenase	[EC:1.8.1.4]	Valine, leucine and isoleucine degradation	Amino acid metabolism	Metabolism	GO:0050789	biological_process	regulation of biological process
OG0000270	dihydrolipoyl dehydrogenase	K00382	DLD, lpd, pdhD; dihydrolipoamide dehydrogenase	[EC:1.8.1.4]	Valine, leucine and isoleucine degradation	Amino acid metabolism	Metabolism	GO:0000166	molecular_function	nucleotide binding
OG0000270	dihydrolipoyl dehydrogenase	K00382	DLD, lpd, pdhD; dihydrolipoamide dehydrogenase	[EC:1.8.1.4]	Valine, leucine and isoleucine degradation	Amino acid metabolism	Metabolism	GO:0097159	molecular_function	organic cyclic compound binding
OG0000270	dihydrolipoyl dehydrogenase	K00382	DLD, lpd, pdhD; dihydrolipoamide dehydrogenase	[EC:1.8.1.4]	Valine, leucine and isoleucine degradation	Amino acid metabolism	Metabolism	GO:0050794	biological_process	regulation of cellular process
OG0000270	dihydrolipoyl dehydrogenase	K00382	DLD, lpd, pdhD; dihydrolipoamide dehydrogenase	[EC:1.8.1.4]	Valine, leucine and isoleucine degradation	Amino acid metabolism	Metabolism	GO:0016491	molecular_function	oxidoreductase activity
OG0000270	dihydrolipoyl dehydrogenase	K00382	DLD, lpd, pdhD; dihydrolipoamide dehydrogenase	[EC:1.8.1.4]	Valine, leucine and isoleucine degradation	Amino acid metabolism	Metabolism	GO:1901265	molecular_function	nucleoside phosphate binding
OG0000270	dihydrolipoyl dehydrogenase	K00382	DLD, lpd, pdhD; dihydrolipoamide dehydrogenase	[EC:1.8.1.4]	Valine, leucine and isoleucine degradation	Amino acid metabolism	Metabolism	GO:0019725	biological_process	cellular homeostasis
OG0000270	dihydrolipoyl dehydrogenase	K00382	DLD, lpd, pdhD; dihydrolipoamide dehydrogenase	[EC:1.8.1.4]	Valine, leucine and isoleucine degradation	Amino acid metabolism	Metabolism	GO:1901363	molecular_function	heterocyclic compound binding
OG0000270	dihydrolipoyl dehydrogenase	K00382	DLD, lpd, pdhD; dihydrolipoamide dehydrogenase	[EC:1.8.1.4]	Valine, leucine and isoleucine degradation	Amino acid metabolism	Metabolism	GO:0045454	biological_process	cell redox homeostasis
OG0000270	dihydrolipoyl dehydrogenase	K00382	DLD, lpd, pdhD; dihydrolipoamide dehydrogenase	[EC:1.8.1.4]	Valine, leucine and isoleucine degradation	Amino acid metabolism	Metabolism	GO:0065007	biological_process	biological regulation
OG0000270	dihydrolipoyl dehydrogenase	K00382	DLD, lpd, pdhD; dihydrolipoamide dehydrogenase	[EC:1.8.1.4]	Valine, leucine and isoleucine degradation	Amino acid metabolism	Metabolism	GO:0003824	molecular_function	catalytic activity
OG0000270	dihydrolipoyl dehydrogenase	K00382	DLD, lpd, pdhD; dihydrolipoamide dehydrogenase	[EC:1.8.1.4]	Valine, leucine and isoleucine degradation	Amino acid metabolism	Metabolism	GO:0005488	molecular_function	binding
OG0000270	dihydrolipoyl dehydrogenase	K00382	DLD, lpd, pdhD; dihydrolipoamide dehydrogenase	[EC:1.8.1.4]	Valine, leucine and isoleucine degradation	Amino acid metabolism	Metabolism	GO:0065008	biological_process	regulation of biological quality
OG0000270	dihydrolipoyl dehydrogenase	K00382	DLD, lpd, pdhD; dihydrolipoamide dehydrogenase	[EC:1.8.1.4]	Valine, leucine and isoleucine degradation	Amino acid metabolism	Metabolism	GO:0004148	molecular_function	dihydrolipoyl dehydrogenase activity
OG0000270	dihydrolipoyl dehydrogenase	K00382	DLD, lpd, pdhD; dihydrolipoamide dehydrogenase	[EC:1.8.1.4]	Valine, leucine and isoleucine degradation	Amino acid metabolism	Metabolism	GO:0008150	biological_process	biological_process
OG0000270	dihydrolipoyl dehydrogenase	K00382	DLD, lpd, pdhD; dihydrolipoamide dehydrogenase	[EC:1.8.1.4]	Valine, leucine and isoleucine degradation	Amino acid metabolism	Metabolism	GO:0003674	molecular_function	molecular_function
OG0000270	dihydrolipoyl dehydrogenase	K00382	DLD, lpd, pdhD; dihydrolipoamide dehydrogenase	[EC:1.8.1.4]	Valine, leucine and isoleucine degradation	Amino acid metabolism	Metabolism	GO:0016667	molecular_function	oxidoreductase activity, acting on a sulfur group of donors
OG0000270	dihydrolipoyl dehydrogenase	K00382	DLD, lpd, pdhD; dihydrolipoamide dehydrogenase	[EC:1.8.1.4]	Valine, leucine and isoleucine degradation	Amino acid metabolism	Metabolism	GO:0016668	molecular_function	oxidoreductase activity, acting on a sulfur group of donors, NAD(P) as acceptor
OG0000270	dihydrolipoyl dehydrogenase	K00382	DLD, lpd, pdhD; dihydrolipoamide dehydrogenase	[EC:1.8.1.4]	Valine, leucine and isoleucine degradation	Amino acid metabolism	Metabolism	GO:0036094	molecular_function	small molecule binding
OG0000270	dihydrolipoyl dehydrogenase	K00382	DLD, lpd, pdhD; dihydrolipoamide dehydrogenase	[EC:1.8.1.4]	Valine, leucine and isoleucine degradation	Amino acid metabolism	Metabolism	GO:0043167	molecular_function	ion binding
OG0000270	dihydrolipoyl dehydrogenase	K00382	DLD, lpd, pdhD; dihydrolipoamide dehydrogenase	[EC:1.8.1.4]	Lysine degradation	Amino acid metabolism	Metabolism	GO:0043168	molecular_function	anion binding
OG0000270	dihydrolipoyl dehydrogenase	K00382	DLD, lpd, pdhD; dihydrolipoamide dehydrogenase	[EC:1.8.1.4]	Lysine degradation	Amino acid metabolism	Metabolism	GO:0042592	biological_process	homeostatic process
OG0000270	dihydrolipoyl dehydrogenase	K00382	DLD, lpd, pdhD; dihydrolipoamide dehydrogenase	[EC:1.8.1.4]	Lysine degradation	Amino acid metabolism	Metabolism	GO:0009987	biological_process	cellular process
OG0000270	dihydrolipoyl dehydrogenase	K00382	DLD, lpd, pdhD; dihydrolipoamide dehydrogenase	[EC:1.8.1.4]	Lysine degradation	Amino acid metabolism	Metabolism	GO:0050660	molecular_function	flavin adenine dinucleotide binding
OG0000270	dihydrolipoyl dehydrogenase	K00382	DLD, lpd, pdhD; dihydrolipoamide dehydrogenase	[EC:1.8.1.4]	Lysine degradation	Amino acid metabolism	Metabolism	GO:0050789	biological_process	regulation of biological process
OG0000270	dihydrolipoyl dehydrogenase	K00382	DLD, lpd, pdhD; dihydrolipoamide dehydrogenase	[EC:1.8.1.4]	Lysine degradation	Amino acid metabolism	Metabolism	GO:0000166	molecular_function	nucleotide binding
OG0000270	dihydrolipoyl dehydrogenase	K00382	DLD, lpd, pdhD; dihydrolipoamide dehydrogenase	[EC:1.8.1.4]	Lysine degradation	Amino acid metabolism	Metabolism	GO:0097159	molecular_function	organic cyclic compound binding
OG0000270	dihydrolipoyl dehydrogenase	K00382	DLD, lpd, pdhD; dihydrolipoamide dehydrogenase	[EC:1.8.1.4]	Lysine degradation	Amino acid metabolism	Metabolism	GO:0050794	biological_process	regulation of cellular process
OG0000270	dihydrolipoyl dehydrogenase	K00382	DLD, lpd, pdhD; dihydrolipoamide dehydrogenase	[EC:1.8.1.4]	Lysine degradation	Amino acid metabolism	Metabolism	GO:0016491	molecular_function	oxidoreductase activity
OG0000270	dihydrolipoyl dehydrogenase	K00382	DLD, lpd, pdhD; dihydrolipoamide dehydrogenase	[EC:1.8.1.4]	Lysine degradation	Amino acid metabolism	Metabolism	GO:1901265	molecular_function	nucleoside phosphate binding
OG0000270	dihydrolipoyl dehydrogenase	K00382	DLD, lpd, pdhD; dihydrolipoamide dehydrogenase	[EC:1.8.1.4]	Lysine degradation	Amino acid metabolism	Metabolism	GO:0019725	biological_process	cellular homeostasis
OG0000270	dihydrolipoyl dehydrogenase	K00382	DLD, lpd, pdhD; dihydrolipoamide dehydrogenase	[EC:1.8.1.4]	Lysine degradation	Amino acid metabolism	Metabolism	GO:1901363	molecular_function	heterocyclic compound binding
OG0000270	dihydrolipoyl dehydrogenase	K00382	DLD, lpd, pdhD; dihydrolipoamide dehydrogenase	[EC:1.8.1.4]	Lysine degradation	Amino acid metabolism	Metabolism	GO:0045454	biological_process	cell redox homeostasis
OG0000270	dihydrolipoyl dehydrogenase	K00382	DLD, lpd, pdhD; dihydrolipoamide dehydrogenase	[EC:1.8.1.4]	Lysine degradation	Amino acid metabolism	Metabolism	GO:0065007	biological_process	biological regulation
OG0000270	dihydrolipoyl dehydrogenase	K00382	DLD, lpd, pdhD; dihydrolipoamide dehydrogenase	[EC:1.8.1.4]	Lysine degradation	Amino acid metabolism	Metabolism	GO:0003824	molecular_function	catalytic activity
OG0000270	dihydrolipoyl dehydrogenase	K00382	DLD, lpd, pdhD; dihydrolipoamide dehydrogenase	[EC:1.8.1.4]	Lysine degradation	Amino acid metabolism	Metabolism	GO:0005488	molecular_function	binding
OG0000270	dihydrolipoyl dehydrogenase	K00382	DLD, lpd, pdhD; dihydrolipoamide dehydrogenase	[EC:1.8.1.4]	Lysine degradation	Amino acid metabolism	Metabolism	GO:0065008	biological_process	regulation of biological quality
OG0000270	dihydrolipoyl dehydrogenase	K00382	DLD, lpd, pdhD; dihydrolipoamide dehydrogenase	[EC:1.8.1.4]	Lysine degradation	Amino acid metabolism	Metabolism	GO:0004148	molecular_function	dihydrolipoyl dehydrogenase activity
OG0000270	dihydrolipoyl dehydrogenase	K00382	DLD, lpd, pdhD; dihydrolipoamide dehydrogenase	[EC:1.8.1.4]	Lysine degradation	Amino acid metabolism	Metabolism	GO:0008150	biological_process	biological_process
OG0000270	dihydrolipoyl dehydrogenase	K00382	DLD, lpd, pdhD; dihydrolipoamide dehydrogenase	[EC:1.8.1.4]	Lysine degradation	Amino acid metabolism	Metabolism	GO:0003674	molecular_function	molecular_function
OG0000270	dihydrolipoyl dehydrogenase	K00382	DLD, lpd, pdhD; dihydrolipoamide dehydrogenase	[EC:1.8.1.4]	Lysine degradation	Amino acid metabolism	Metabolism	GO:0016667	molecular_function	oxidoreductase activity, acting on a sulfur group of donors
OG0000270	dihydrolipoyl dehydrogenase	K00382	DLD, lpd, pdhD; dihydrolipoamide dehydrogenase	[EC:1.8.1.4]	Lysine degradation	Amino acid metabolism	Metabolism	GO:0016668	molecular_function	oxidoreductase activity, acting on a sulfur group of donors, NAD(P) as acceptor
OG0000270	dihydrolipoyl dehydrogenase	K00382	DLD, lpd, pdhD; dihydrolipoamide dehydrogenase	[EC:1.8.1.4]	Lysine degradation	Amino acid metabolism	Metabolism	GO:0036094	molecular_function	small molecule binding
OG0000270	dihydrolipoyl dehydrogenase	K00382	DLD, lpd, pdhD; dihydrolipoamide dehydrogenase	[EC:1.8.1.4]	Lysine degradation	Amino acid metabolism	Metabolism	GO:0043167	molecular_function	ion binding
OG0000270	dihydrolipoyl dehydrogenase	K00382	DLD, lpd, pdhD; dihydrolipoamide dehydrogenase	[EC:1.8.1.4]	Tryptophan metabolism	Amino acid metabolism	Metabolism	GO:0043168	molecular_function	anion binding
OG0000270	dihydrolipoyl dehydrogenase	K00382	DLD, lpd, pdhD; dihydrolipoamide dehydrogenase	[EC:1.8.1.4]	Tryptophan metabolism	Amino acid metabolism	Metabolism	GO:0042592	biological_process	homeostatic process
OG0000270	dihydrolipoyl dehydrogenase	K00382	DLD, lpd, pdhD; dihydrolipoamide dehydrogenase	[EC:1.8.1.4]	Tryptophan metabolism	Amino acid metabolism	Metabolism	GO:0009987	biological_process	cellular process
OG0000270	dihydrolipoyl dehydrogenase	K00382	DLD, lpd, pdhD; dihydrolipoamide dehydrogenase	[EC:1.8.1.4]	Tryptophan metabolism	Amino acid metabolism	Metabolism	GO:0050660	molecular_function	flavin adenine dinucleotide binding
OG0000270	dihydrolipoyl dehydrogenase	K00382	DLD, lpd, pdhD; dihydrolipoamide dehydrogenase	[EC:1.8.1.4]	Tryptophan metabolism	Amino acid metabolism	Metabolism	GO:0050789	biological_process	regulation of biological process
OG0000270	dihydrolipoyl dehydrogenase	K00382	DLD, lpd, pdhD; dihydrolipoamide dehydrogenase	[EC:1.8.1.4]	Tryptophan metabolism	Amino acid metabolism	Metabolism	GO:0000166	molecular_function	nucleotide binding
OG0000270	dihydrolipoyl dehydrogenase	K00382	DLD, lpd, pdhD; dihydrolipoamide dehydrogenase	[EC:1.8.1.4]	Tryptophan metabolism	Amino acid metabolism	Metabolism	GO:0097159	molecular_function	organic cyclic compound binding
OG0000270	dihydrolipoyl dehydrogenase	K00382	DLD, lpd, pdhD; dihydrolipoamide dehydrogenase	[EC:1.8.1.4]	Tryptophan metabolism	Amino acid metabolism	Metabolism	GO:0050794	biological_process	regulation of cellular process
OG0000270	dihydrolipoyl dehydrogenase	K00382	DLD, lpd, pdhD; dihydrolipoamide dehydrogenase	[EC:1.8.1.4]	Tryptophan metabolism	Amino acid metabolism	Metabolism	GO:0016491	molecular_function	oxidoreductase activity
OG0000270	dihydrolipoyl dehydrogenase	K00382	DLD, lpd, pdhD; dihydrolipoamide dehydrogenase	[EC:1.8.1.4]	Tryptophan metabolism	Amino acid metabolism	Metabolism	GO:1901265	molecular_function	nucleoside phosphate binding
OG0000270	dihydrolipoyl dehydrogenase	K00382	DLD, lpd, pdhD; dihydrolipoamide dehydrogenase	[EC:1.8.1.4]	Tryptophan metabolism	Amino acid metabolism	Metabolism	GO:0019725	biological_process	cellular homeostasis
OG0000270	dihydrolipoyl dehydrogenase	K00382	DLD, lpd, pdhD; dihydrolipoamide dehydrogenase	[EC:1.8.1.4]	Tryptophan metabolism	Amino acid metabolism	Metabolism	GO:1901363	molecular_function	heterocyclic compound binding
OG0000270	dihydrolipoyl dehydrogenase	K00382	DLD, lpd, pdhD; dihydrolipoamide dehydrogenase	[EC:1.8.1.4]	Tryptophan metabolism	Amino acid metabolism	Metabolism	GO:0045454	biological_process	cell redox homeostasis
OG0000270	dihydrolipoyl dehydrogenase	K00382	DLD, lpd, pdhD; dihydrolipoamide dehydrogenase	[EC:1.8.1.4]	Tryptophan metabolism	Amino acid metabolism	Metabolism	GO:0065007	biological_process	biological regulation
OG0000270	dihydrolipoyl dehydrogenase	K00382	DLD, lpd, pdhD; dihydrolipoamide dehydrogenase	[EC:1.8.1.4]	Tryptophan metabolism	Amino acid metabolism	Metabolism	GO:0003824	molecular_function	catalytic activity
OG0000270	dihydrolipoyl dehydrogenase	K00382	DLD, lpd, pdhD; dihydrolipoamide dehydrogenase	[EC:1.8.1.4]	Tryptophan metabolism	Amino acid metabolism	Metabolism	GO:0005488	molecular_function	binding
OG0000270	dihydrolipoyl dehydrogenase	K00382	DLD, lpd, pdhD; dihydrolipoamide dehydrogenase	[EC:1.8.1.4]	Tryptophan metabolism	Amino acid metabolism	Metabolism	GO:0065008	biological_process	regulation of biological quality
OG0000270	dihydrolipoyl dehydrogenase	K00382	DLD, lpd, pdhD; dihydrolipoamide dehydrogenase	[EC:1.8.1.4]	Tryptophan metabolism	Amino acid metabolism	Metabolism	GO:0004148	molecular_function	dihydrolipoyl dehydrogenase activity
OG0000270	dihydrolipoyl dehydrogenase	K00382	DLD, lpd, pdhD; dihydrolipoamide dehydrogenase	[EC:1.8.1.4]	Tryptophan metabolism	Amino acid metabolism	Metabolism	GO:0008150	biological_process	biological_process
OG0000270	dihydrolipoyl dehydrogenase	K00382	DLD, lpd, pdhD; dihydrolipoamide dehydrogenase	[EC:1.8.1.4]	Tryptophan metabolism	Amino acid metabolism	Metabolism	GO:0003674	molecular_function	molecular_function
OG0000270	dihydrolipoyl dehydrogenase	K00382	DLD, lpd, pdhD; dihydrolipoamide dehydrogenase	[EC:1.8.1.4]	Tryptophan metabolism	Amino acid metabolism	Metabolism	GO:0016667	molecular_function	oxidoreductase activity, acting on a sulfur group of donors
OG0000270	dihydrolipoyl dehydrogenase	K00382	DLD, lpd, pdhD; dihydrolipoamide dehydrogenase	[EC:1.8.1.4]	Tryptophan metabolism	Amino acid metabolism	Metabolism	GO:0016668	molecular_function	oxidoreductase activity, acting on a sulfur group of donors, NAD(P) as acceptor
OG0000270	dihydrolipoyl dehydrogenase	K00382	DLD, lpd, pdhD; dihydrolipoamide dehydrogenase	[EC:1.8.1.4]	Tryptophan metabolism	Amino acid metabolism	Metabolism	GO:0036094	molecular_function	small molecule binding
OG0000270	dihydrolipoyl dehydrogenase	K00382	DLD, lpd, pdhD; dihydrolipoamide dehydrogenase	[EC:1.8.1.4]	Tryptophan metabolism	Amino acid metabolism	Metabolism	GO:0043167	molecular_function	ion binding
OG0000282	L-fuconate dehydratase	K18334	fucD; L-fuconate dehydratase	[EC:4.2.1.68]	Fructose and mannose metabolism	Carbohydrate metabolism	Metabolism	GO:0006082	biological_process	organic acid metabolic process
OG0000282	L-fuconate dehydratase	K18334	fucD; L-fuconate dehydratase	[EC:4.2.1.68]	Fructose and mannose metabolism	Carbohydrate metabolism	Metabolism	GO:0009987	biological_process	cellular process
OG0000282	L-fuconate dehydratase	K18334	fucD; L-fuconate dehydratase	[EC:4.2.1.68]	Fructose and mannose metabolism	Carbohydrate metabolism	Metabolism	GO:0016835	molecular_function	carbon-oxygen lyase activity
OG0000282	L-fuconate dehydratase	K18334	fucD; L-fuconate dehydratase	[EC:4.2.1.68]	Fructose and mannose metabolism	Carbohydrate metabolism	Metabolism	GO:0016836	molecular_function	hydro-lyase activity
OG0000282	L-fuconate dehydratase	K18334	fucD; L-fuconate dehydratase	[EC:4.2.1.68]	Fructose and mannose metabolism	Carbohydrate metabolism	Metabolism	GO:0044237	biological_process	cellular metabolic process
OG0000282	L-fuconate dehydratase	K18334	fucD; L-fuconate dehydratase	[EC:4.2.1.68]	Fructose and mannose metabolism	Carbohydrate metabolism	Metabolism	GO:0044238	biological_process	primary metabolic process
OG0000282	L-fuconate dehydratase	K18334	fucD; L-fuconate dehydratase	[EC:4.2.1.68]	Fructose and mannose metabolism	Carbohydrate metabolism	Metabolism	GO:0016853	molecular_function	isomerase activity
OG0000282	L-fuconate dehydratase	K18334	fucD; L-fuconate dehydratase	[EC:4.2.1.68]	Fructose and mannose metabolism	Carbohydrate metabolism	Metabolism	GO:0008150	biological_process	biological_process
OG0000282	L-fuconate dehydratase	K18334	fucD; L-fuconate dehydratase	[EC:4.2.1.68]	Fructose and mannose metabolism	Carbohydrate metabolism	Metabolism	GO:0005975	biological_process	carbohydrate metabolic process
OG0000282	L-fuconate dehydratase	K18334	fucD; L-fuconate dehydratase	[EC:4.2.1.68]	Fructose and mannose metabolism	Carbohydrate metabolism	Metabolism	GO:0006807	biological_process	nitrogen compound metabolic process
OG0000282	L-fuconate dehydratase	K18334	fucD; L-fuconate dehydratase	[EC:4.2.1.68]	Fructose and mannose metabolism	Carbohydrate metabolism	Metabolism	GO:0008152	biological_process	metabolic process
OG0000282	L-fuconate dehydratase	K18334	fucD; L-fuconate dehydratase	[EC:4.2.1.68]	Fructose and mannose metabolism	Carbohydrate metabolism	Metabolism	GO:0044248	biological_process	cellular catabolic process
OG0000282	L-fuconate dehydratase	K18334	fucD; L-fuconate dehydratase	[EC:4.2.1.68]	Fructose and mannose metabolism	Carbohydrate metabolism	Metabolism	GO:0071704	biological_process	organic substance metabolic process
OG0000282	L-fuconate dehydratase	K18334	fucD; L-fuconate dehydratase	[EC:4.2.1.68]	Fructose and mannose metabolism	Carbohydrate metabolism	Metabolism	GO:1901575	biological_process	organic substance catabolic process
OG0000282	L-fuconate dehydratase	K18334	fucD; L-fuconate dehydratase	[EC:4.2.1.68]	Fructose and mannose metabolism	Carbohydrate metabolism	Metabolism	GO:0003674	molecular_function	molecular_function
OG0000282	L-fuconate dehydratase	K18334	fucD; L-fuconate dehydratase	[EC:4.2.1.68]	Fructose and mannose metabolism	Carbohydrate metabolism	Metabolism	GO:0009056	biological_process	catabolic process
OG0000282	L-fuconate dehydratase	K18334	fucD; L-fuconate dehydratase	[EC:4.2.1.68]	Fructose and mannose metabolism	Carbohydrate metabolism	Metabolism	GO:1901565	biological_process	organonitrogen compound catabolic process
OG0000282	L-fuconate dehydratase	K18334	fucD; L-fuconate dehydratase	[EC:4.2.1.68]	Fructose and mannose metabolism	Carbohydrate metabolism	Metabolism	GO:1901564	biological_process	organonitrogen compound metabolic process
OG0000282	L-fuconate dehydratase	K18334	fucD; L-fuconate dehydratase	[EC:4.2.1.68]	Fructose and mannose metabolism	Carbohydrate metabolism	Metabolism	GO:0009063	biological_process	cellular amino acid catabolic process
OG0000282	L-fuconate dehydratase	K18334	fucD; L-fuconate dehydratase	[EC:4.2.1.68]	Fructose and mannose metabolism	Carbohydrate metabolism	Metabolism	GO:0050023	molecular_function	L-fuconate dehydratase activity
OG0000282	L-fuconate dehydratase	K18334	fucD; L-fuconate dehydratase	[EC:4.2.1.68]	Fructose and mannose metabolism	Carbohydrate metabolism	Metabolism	GO:0019752	biological_process	carboxylic acid metabolic process
OG0000282	L-fuconate dehydratase	K18334	fucD; L-fuconate dehydratase	[EC:4.2.1.68]	Fructose and mannose metabolism	Carbohydrate metabolism	Metabolism	GO:0043436	biological_process	oxoacid metabolic process
OG0000282	L-fuconate dehydratase	K18334	fucD; L-fuconate dehydratase	[EC:4.2.1.68]	Fructose and mannose metabolism	Carbohydrate metabolism	Metabolism	GO:0003824	molecular_function	catalytic activity
OG0000282	L-fuconate dehydratase	K18334	fucD; L-fuconate dehydratase	[EC:4.2.1.68]	Fructose and mannose metabolism	Carbohydrate metabolism	Metabolism	GO:0016052	biological_process	carbohydrate catabolic process
OG0000282	L-fuconate dehydratase	K18334	fucD; L-fuconate dehydratase	[EC:4.2.1.68]	Fructose and mannose metabolism	Carbohydrate metabolism	Metabolism	GO:0016054	biological_process	organic acid catabolic process
OG0000282	L-fuconate dehydratase	K18334	fucD; L-fuconate dehydratase	[EC:4.2.1.68]	Fructose and mannose metabolism	Carbohydrate metabolism	Metabolism	GO:0006520	biological_process	cellular amino acid metabolic process
OG0000282	L-fuconate dehydratase	K18334	fucD; L-fuconate dehydratase	[EC:4.2.1.68]	Fructose and mannose metabolism	Carbohydrate metabolism	Metabolism	GO:0044281	biological_process	small molecule metabolic process
OG0000282	L-fuconate dehydratase	K18334	fucD; L-fuconate dehydratase	[EC:4.2.1.68]	Fructose and mannose metabolism	Carbohydrate metabolism	Metabolism	GO:0044282	biological_process	small molecule catabolic process
OG0000282	L-fuconate dehydratase	K18334	fucD; L-fuconate dehydratase	[EC:4.2.1.68]	Fructose and mannose metabolism	Carbohydrate metabolism	Metabolism	GO:0046395	biological_process	carboxylic acid catabolic process
OG0000282	L-fuconate dehydratase	K18334	fucD; L-fuconate dehydratase	[EC:4.2.1.68]	Fructose and mannose metabolism	Carbohydrate metabolism	Metabolism	GO:0016829	molecular_function	lyase activity
OG0000301	penicillin-binding protein 1A	K05366	mrcA; penicillin-binding protein 1A	[EC:2.4.1.129 3.4.16.4]	Peptidoglycan biosynthesis	Glycan biosynthesis and metabolism	Metabolism	GO:0071555	biological_process	cell wall organization
OG0000301	penicillin-binding protein 1A	K05366	mrcA; penicillin-binding protein 1A	[EC:2.4.1.129 3.4.16.4]	Peptidoglycan biosynthesis	Glycan biosynthesis and metabolism	Metabolism	GO:0009987	biological_process	cellular process
OG0000301	penicillin-binding protein 1A	K05366	mrcA; penicillin-binding protein 1A	[EC:2.4.1.129 3.4.16.4]	Peptidoglycan biosynthesis	Glycan biosynthesis and metabolism	Metabolism	GO:0071554	biological_process	cell wall organization or biogenesis
OG0000301	penicillin-binding protein 1A	K05366	mrcA; penicillin-binding protein 1A	[EC:2.4.1.129 3.4.16.4]	Peptidoglycan biosynthesis	Glycan biosynthesis and metabolism	Metabolism	GO:0044036	biological_process	cell wall macromolecule metabolic process
OG0000301	penicillin-binding protein 1A	K05366	mrcA; penicillin-binding protein 1A	[EC:2.4.1.129 3.4.16.4]	Peptidoglycan biosynthesis	Glycan biosynthesis and metabolism	Metabolism	GO:0006022	biological_process	aminoglycan metabolic process
OG0000301	penicillin-binding protein 1A	K05366	mrcA; penicillin-binding protein 1A	[EC:2.4.1.129 3.4.16.4]	Peptidoglycan biosynthesis	Glycan biosynthesis and metabolism	Metabolism	GO:0044038	biological_process	cell wall macromolecule biosynthetic process
OG0000301	penicillin-binding protein 1A	K05366	mrcA; penicillin-binding protein 1A	[EC:2.4.1.129 3.4.16.4]	Peptidoglycan biosynthesis	Glycan biosynthesis and metabolism	Metabolism	GO:0000902	biological_process	cell morphogenesis
OG0000301	penicillin-binding protein 1A	K05366	mrcA; penicillin-binding protein 1A	[EC:2.4.1.129 3.4.16.4]	Peptidoglycan biosynthesis	Glycan biosynthesis and metabolism	Metabolism	GO:0097159	molecular_function	organic cyclic compound binding
OG0000301	penicillin-binding protein 1A	K05366	mrcA; penicillin-binding protein 1A	[EC:2.4.1.129 3.4.16.4]	Peptidoglycan biosynthesis	Glycan biosynthesis and metabolism	Metabolism	GO:0006023	biological_process	aminoglycan biosynthetic process
OG0000301	penicillin-binding protein 1A	K05366	mrcA; penicillin-binding protein 1A	[EC:2.4.1.129 3.4.16.4]	Peptidoglycan biosynthesis	Glycan biosynthesis and metabolism	Metabolism	GO:0006024	biological_process	glycosaminoglycan biosynthetic process
OG0000301	penicillin-binding protein 1A	K05366	mrcA; penicillin-binding protein 1A	[EC:2.4.1.129 3.4.16.4]	Peptidoglycan biosynthesis	Glycan biosynthesis and metabolism	Metabolism	GO:0071944	cellular_component	cell periphery
OG0000301	penicillin-binding protein 1A	K05366	mrcA; penicillin-binding protein 1A	[EC:2.4.1.129 3.4.16.4]	Peptidoglycan biosynthesis	Glycan biosynthesis and metabolism	Metabolism	GO:0033293	molecular_function	monocarboxylic acid binding
OG0000301	penicillin-binding protein 1A	K05366	mrcA; penicillin-binding protein 1A	[EC:2.4.1.129 3.4.16.4]	Peptidoglycan biosynthesis	Glycan biosynthesis and metabolism	Metabolism	GO:0000270	biological_process	peptidoglycan metabolic process
OG0000301	penicillin-binding protein 1A	K05366	mrcA; penicillin-binding protein 1A	[EC:2.4.1.129 3.4.16.4]	Peptidoglycan biosynthesis	Glycan biosynthesis and metabolism	Metabolism	GO:0016787	molecular_function	hydrolase activity
OG0000301	penicillin-binding protein 1A	K05366	mrcA; penicillin-binding protein 1A	[EC:2.4.1.129 3.4.16.4]	Peptidoglycan biosynthesis	Glycan biosynthesis and metabolism	Metabolism	GO:0017171	molecular_function	serine hydrolase activity
OG0000301	penicillin-binding protein 1A	K05366	mrcA; penicillin-binding protein 1A	[EC:2.4.1.129 3.4.16.4]	Peptidoglycan biosynthesis	Glycan biosynthesis and metabolism	Metabolism	GO:0016020	cellular_component	membrane
OG0000301	penicillin-binding protein 1A	K05366	mrcA; penicillin-binding protein 1A	[EC:2.4.1.129 3.4.16.4]	Peptidoglycan biosynthesis	Glycan biosynthesis and metabolism	Metabolism	GO:1901576	biological_process	organic substance biosynthetic process
OG0000301	penicillin-binding protein 1A	K05366	mrcA; penicillin-binding protein 1A	[EC:2.4.1.129 3.4.16.4]	Peptidoglycan biosynthesis	Glycan biosynthesis and metabolism	Metabolism	GO:0016021	cellular_component	integral component of membrane
OG0000301	penicillin-binding protein 1A	K05366	mrcA; penicillin-binding protein 1A	[EC:2.4.1.129 3.4.16.4]	Peptidoglycan biosynthesis	Glycan biosynthesis and metabolism	Metabolism	GO:0006807	biological_process	nitrogen compound metabolic process
OG0000301	penicillin-binding protein 1A	K05366	mrcA; penicillin-binding protein 1A	[EC:2.4.1.129 3.4.16.4]	Peptidoglycan biosynthesis	Glycan biosynthesis and metabolism	Metabolism	GO:0071704	biological_process	organic substance metabolic process
OG0000301	penicillin-binding protein 1A	K05366	mrcA; penicillin-binding protein 1A	[EC:2.4.1.129 3.4.16.4]	Peptidoglycan biosynthesis	Glycan biosynthesis and metabolism	Metabolism	GO:0043167	molecular_function	ion binding
OG0000301	penicillin-binding protein 1A	K05366	mrcA; penicillin-binding protein 1A	[EC:2.4.1.129 3.4.16.4]	Peptidoglycan biosynthesis	Glycan biosynthesis and metabolism	Metabolism	GO:0043168	molecular_function	anion binding
OG0000301	penicillin-binding protein 1A	K05366	mrcA; penicillin-binding protein 1A	[EC:2.4.1.129 3.4.16.4]	Peptidoglycan biosynthesis	Glycan biosynthesis and metabolism	Metabolism	GO:0071840	biological_process	cellular component organization or biogenesis
OG0000301	penicillin-binding protein 1A	K05366	mrcA; penicillin-binding protein 1A	[EC:2.4.1.129 3.4.16.4]	Peptidoglycan biosynthesis	Glycan biosynthesis and metabolism	Metabolism	GO:0043170	biological_process	macromolecule metabolic process
OG0000301	penicillin-binding protein 1A	K05366	mrcA; penicillin-binding protein 1A	[EC:2.4.1.129 3.4.16.4]	Peptidoglycan biosynthesis	Glycan biosynthesis and metabolism	Metabolism	GO:0009252	biological_process	peptidoglycan biosynthetic process
OG0000301	penicillin-binding protein 1A	K05366	mrcA; penicillin-binding protein 1A	[EC:2.4.1.129 3.4.16.4]	Peptidoglycan biosynthesis	Glycan biosynthesis and metabolism	Metabolism	GO:0008360	biological_process	regulation of cell shape
OG0000301	penicillin-binding protein 1A	K05366	mrcA; penicillin-binding protein 1A	[EC:2.4.1.129 3.4.16.4]	Peptidoglycan biosynthesis	Glycan biosynthesis and metabolism	Metabolism	GO:0008233	molecular_function	peptidase activity
OG0000301	penicillin-binding protein 1A	K05366	mrcA; penicillin-binding protein 1A	[EC:2.4.1.129 3.4.16.4]	Peptidoglycan biosynthesis	Glycan biosynthesis and metabolism	Metabolism	GO:0043177	molecular_function	organic acid binding
OG0000301	penicillin-binding protein 1A	K05366	mrcA; penicillin-binding protein 1A	[EC:2.4.1.129 3.4.16.4]	Peptidoglycan biosynthesis	Glycan biosynthesis and metabolism	Metabolism	GO:0009002	molecular_function	serine-type D-Ala-D-Ala carboxypeptidase activity
OG0000301	penicillin-binding protein 1A	K05366	mrcA; penicillin-binding protein 1A	[EC:2.4.1.129 3.4.16.4]	Peptidoglycan biosynthesis	Glycan biosynthesis and metabolism	Metabolism	GO:0016043	biological_process	cellular component organization
OG0000301	penicillin-binding protein 1A	K05366	mrcA; penicillin-binding protein 1A	[EC:2.4.1.129 3.4.16.4]	Peptidoglycan biosynthesis	Glycan biosynthesis and metabolism	Metabolism	GO:0008236	molecular_function	serine-type peptidase activity
OG0000301	penicillin-binding protein 1A	K05366	mrcA; penicillin-binding protein 1A	[EC:2.4.1.129 3.4.16.4]	Peptidoglycan biosynthesis	Glycan biosynthesis and metabolism	Metabolism	GO:0045229	biological_process	external encapsulating structure organization
OG0000301	penicillin-binding protein 1A	K05366	mrcA; penicillin-binding protein 1A	[EC:2.4.1.129 3.4.16.4]	Peptidoglycan biosynthesis	Glycan biosynthesis and metabolism	Metabolism	GO:0008238	molecular_function	exopeptidase activity
OG0000301	penicillin-binding protein 1A	K05366	mrcA; penicillin-binding protein 1A	[EC:2.4.1.129 3.4.16.4]	Peptidoglycan biosynthesis	Glycan biosynthesis and metabolism	Metabolism	GO:0031406	molecular_function	carboxylic acid binding
OG0000301	penicillin-binding protein 1A	K05366	mrcA; penicillin-binding protein 1A	[EC:2.4.1.129 3.4.16.4]	Peptidoglycan biosynthesis	Glycan biosynthesis and metabolism	Metabolism	GO:1901363	molecular_function	heterocyclic compound binding
OG0000301	penicillin-binding protein 1A	K05366	mrcA; penicillin-binding protein 1A	[EC:2.4.1.129 3.4.16.4]	Peptidoglycan biosynthesis	Glycan biosynthesis and metabolism	Metabolism	GO:0042546	biological_process	cell wall biogenesis
OG0000301	penicillin-binding protein 1A	K05366	mrcA; penicillin-binding protein 1A	[EC:2.4.1.129 3.4.16.4]	Peptidoglycan biosynthesis	Glycan biosynthesis and metabolism	Metabolism	GO:0044085	biological_process	cellular component biogenesis
OG0000301	penicillin-binding protein 1A	K05366	mrcA; penicillin-binding protein 1A	[EC:2.4.1.129 3.4.16.4]	Peptidoglycan biosynthesis	Glycan biosynthesis and metabolism	Metabolism	GO:0009653	biological_process	anatomical structure morphogenesis
OG0000301	penicillin-binding protein 1A	K05366	mrcA; penicillin-binding protein 1A	[EC:2.4.1.129 3.4.16.4]	Peptidoglycan biosynthesis	Glycan biosynthesis and metabolism	Metabolism	GO:0009273	biological_process	peptidoglycan-based cell wall biogenesis
OG0000301	penicillin-binding protein 1A	K05366	mrcA; penicillin-binding protein 1A	[EC:2.4.1.129 3.4.16.4]	Peptidoglycan biosynthesis	Glycan biosynthesis and metabolism	Metabolism	GO:0070589	biological_process	cellular component macromolecule biosynthetic process
OG0000301	penicillin-binding protein 1A	K05366	mrcA; penicillin-binding protein 1A	[EC:2.4.1.129 3.4.16.4]	Peptidoglycan biosynthesis	Glycan biosynthesis and metabolism	Metabolism	GO:0140096	molecular_function	catalytic activity, acting on a protein
OG0000301	penicillin-binding protein 1A	K05366	mrcA; penicillin-binding protein 1A	[EC:2.4.1.129 3.4.16.4]	Peptidoglycan biosynthesis	Glycan biosynthesis and metabolism	Metabolism	GO:0033218	molecular_function	amide binding
OG0000301	penicillin-binding protein 1A	K05366	mrcA; penicillin-binding protein 1A	[EC:2.4.1.129 3.4.16.4]	Peptidoglycan biosynthesis	Glycan biosynthesis and metabolism	Metabolism	GO:0005575	cellular_component	cellular_component
OG0000301	penicillin-binding protein 1A	K05366	mrcA; penicillin-binding protein 1A	[EC:2.4.1.129 3.4.16.4]	Peptidoglycan biosynthesis	Glycan biosynthesis and metabolism	Metabolism	GO:0022603	biological_process	regulation of anatomical structure morphogenesis
OG0000301	penicillin-binding protein 1A	K05366	mrcA; penicillin-binding protein 1A	[EC:2.4.1.129 3.4.16.4]	Peptidoglycan biosynthesis	Glycan biosynthesis and metabolism	Metabolism	GO:1901137	biological_process	carbohydrate derivative biosynthetic process
OG0000301	penicillin-binding protein 1A	K05366	mrcA; penicillin-binding protein 1A	[EC:2.4.1.129 3.4.16.4]	Peptidoglycan biosynthesis	Glycan biosynthesis and metabolism	Metabolism	GO:0022604	biological_process	regulation of cell morphogenesis
OG0000301	penicillin-binding protein 1A	K05366	mrcA; penicillin-binding protein 1A	[EC:2.4.1.129 3.4.16.4]	Peptidoglycan biosynthesis	Glycan biosynthesis and metabolism	Metabolism	GO:0044237	biological_process	cellular metabolic process
OG0000301	penicillin-binding protein 1A	K05366	mrcA; penicillin-binding protein 1A	[EC:2.4.1.129 3.4.16.4]	Peptidoglycan biosynthesis	Glycan biosynthesis and metabolism	Metabolism	GO:0044238	biological_process	primary metabolic process
OG0000301	penicillin-binding protein 1A	K05366	mrcA; penicillin-binding protein 1A	[EC:2.4.1.129 3.4.16.4]	Peptidoglycan biosynthesis	Glycan biosynthesis and metabolism	Metabolism	GO:0050896	biological_process	response to stimulus
OG0000301	penicillin-binding protein 1A	K05366	mrcA; penicillin-binding protein 1A	[EC:2.4.1.129 3.4.16.4]	Peptidoglycan biosynthesis	Glycan biosynthesis and metabolism	Metabolism	GO:1901135	biological_process	carbohydrate derivative metabolic process
OG0000301	penicillin-binding protein 1A	K05366	mrcA; penicillin-binding protein 1A	[EC:2.4.1.129 3.4.16.4]	Peptidoglycan biosynthesis	Glycan biosynthesis and metabolism	Metabolism	GO:0019538	biological_process	protein metabolic process
OG0000301	penicillin-binding protein 1A	K05366	mrcA; penicillin-binding protein 1A	[EC:2.4.1.129 3.4.16.4]	Peptidoglycan biosynthesis	Glycan biosynthesis and metabolism	Metabolism	GO:0008658	molecular_function	penicillin binding
OG0000301	penicillin-binding protein 1A	K05366	mrcA; penicillin-binding protein 1A	[EC:2.4.1.129 3.4.16.4]	Peptidoglycan biosynthesis	Glycan biosynthesis and metabolism	Metabolism	GO:0004180	molecular_function	carboxypeptidase activity
OG0000301	penicillin-binding protein 1A	K05366	mrcA; penicillin-binding protein 1A	[EC:2.4.1.129 3.4.16.4]	Peptidoglycan biosynthesis	Glycan biosynthesis and metabolism	Metabolism	GO:0110165	cellular_component	cellular anatomical entity
OG0000301	penicillin-binding protein 1A	K05366	mrcA; penicillin-binding protein 1A	[EC:2.4.1.129 3.4.16.4]	Peptidoglycan biosynthesis	Glycan biosynthesis and metabolism	Metabolism	GO:0034645	biological_process	cellular macromolecule biosynthetic process
OG0000301	penicillin-binding protein 1A	K05366	mrcA; penicillin-binding protein 1A	[EC:2.4.1.129 3.4.16.4]	Peptidoglycan biosynthesis	Glycan biosynthesis and metabolism	Metabolism	GO:0046677	biological_process	response to antibiotic
OG0000301	penicillin-binding protein 1A	K05366	mrcA; penicillin-binding protein 1A	[EC:2.4.1.129 3.4.16.4]	Peptidoglycan biosynthesis	Glycan biosynthesis and metabolism	Metabolism	GO:0008150	biological_process	biological_process
OG0000301	penicillin-binding protein 1A	K05366	mrcA; penicillin-binding protein 1A	[EC:2.4.1.129 3.4.16.4]	Peptidoglycan biosynthesis	Glycan biosynthesis and metabolism	Metabolism	GO:0008152	biological_process	metabolic process
OG0000301	penicillin-binding protein 1A	K05366	mrcA; penicillin-binding protein 1A	[EC:2.4.1.129 3.4.16.4]	Peptidoglycan biosynthesis	Glycan biosynthesis and metabolism	Metabolism	GO:0048856	biological_process	anatomical structure development
OG0000301	penicillin-binding protein 1A	K05366	mrcA; penicillin-binding protein 1A	[EC:2.4.1.129 3.4.16.4]	Peptidoglycan biosynthesis	Glycan biosynthesis and metabolism	Metabolism	GO:0044249	biological_process	cellular biosynthetic process
OG0000301	penicillin-binding protein 1A	K05366	mrcA; penicillin-binding protein 1A	[EC:2.4.1.129 3.4.16.4]	Peptidoglycan biosynthesis	Glycan biosynthesis and metabolism	Metabolism	GO:0004185	molecular_function	serine-type carboxypeptidase activity
OG0000301	penicillin-binding protein 1A	K05366	mrcA; penicillin-binding protein 1A	[EC:2.4.1.129 3.4.16.4]	Peptidoglycan biosynthesis	Glycan biosynthesis and metabolism	Metabolism	GO:0003674	molecular_function	molecular_function
OG0000301	penicillin-binding protein 1A	K05366	mrcA; penicillin-binding protein 1A	[EC:2.4.1.129 3.4.16.4]	Peptidoglycan biosynthesis	Glycan biosynthesis and metabolism	Metabolism	GO:1901564	biological_process	organonitrogen compound metabolic process
OG0000301	penicillin-binding protein 1A	K05366	mrcA; penicillin-binding protein 1A	[EC:2.4.1.129 3.4.16.4]	Peptidoglycan biosynthesis	Glycan biosynthesis and metabolism	Metabolism	GO:0009058	biological_process	biosynthetic process
OG0000301	penicillin-binding protein 1A	K05366	mrcA; penicillin-binding protein 1A	[EC:2.4.1.129 3.4.16.4]	Peptidoglycan biosynthesis	Glycan biosynthesis and metabolism	Metabolism	GO:0009059	biological_process	macromolecule biosynthetic process
OG0000301	penicillin-binding protein 1A	K05366	mrcA; penicillin-binding protein 1A	[EC:2.4.1.129 3.4.16.4]	Peptidoglycan biosynthesis	Glycan biosynthesis and metabolism	Metabolism	GO:1901566	biological_process	organonitrogen compound biosynthetic process
OG0000301	penicillin-binding protein 1A	K05366	mrcA; penicillin-binding protein 1A	[EC:2.4.1.129 3.4.16.4]	Peptidoglycan biosynthesis	Glycan biosynthesis and metabolism	Metabolism	GO:0044260	biological_process	cellular macromolecule metabolic process
OG0000301	penicillin-binding protein 1A	K05366	mrcA; penicillin-binding protein 1A	[EC:2.4.1.129 3.4.16.4]	Peptidoglycan biosynthesis	Glycan biosynthesis and metabolism	Metabolism	GO:0016740	molecular_function	transferase activity
OG0000301	penicillin-binding protein 1A	K05366	mrcA; penicillin-binding protein 1A	[EC:2.4.1.129 3.4.16.4]	Peptidoglycan biosynthesis	Glycan biosynthesis and metabolism	Metabolism	GO:0050789	biological_process	regulation of biological process
OG0000301	penicillin-binding protein 1A	K05366	mrcA; penicillin-binding protein 1A	[EC:2.4.1.129 3.4.16.4]	Peptidoglycan biosynthesis	Glycan biosynthesis and metabolism	Metabolism	GO:0050793	biological_process	regulation of developmental process
OG0000301	penicillin-binding protein 1A	K05366	mrcA; penicillin-binding protein 1A	[EC:2.4.1.129 3.4.16.4]	Peptidoglycan biosynthesis	Glycan biosynthesis and metabolism	Metabolism	GO:0006508	biological_process	proteolysis
OG0000301	penicillin-binding protein 1A	K05366	mrcA; penicillin-binding protein 1A	[EC:2.4.1.129 3.4.16.4]	Peptidoglycan biosynthesis	Glycan biosynthesis and metabolism	Metabolism	GO:1901681	molecular_function	sulfur compound binding
OG0000301	penicillin-binding protein 1A	K05366	mrcA; penicillin-binding protein 1A	[EC:2.4.1.129 3.4.16.4]	Peptidoglycan biosynthesis	Glycan biosynthesis and metabolism	Metabolism	GO:0042221	biological_process	response to chemical
OG0000301	penicillin-binding protein 1A	K05366	mrcA; penicillin-binding protein 1A	[EC:2.4.1.129 3.4.16.4]	Peptidoglycan biosynthesis	Glycan biosynthesis and metabolism	Metabolism	GO:0065007	biological_process	biological regulation
OG0000301	penicillin-binding protein 1A	K05366	mrcA; penicillin-binding protein 1A	[EC:2.4.1.129 3.4.16.4]	Peptidoglycan biosynthesis	Glycan biosynthesis and metabolism	Metabolism	GO:0003824	molecular_function	catalytic activity
OG0000301	penicillin-binding protein 1A	K05366	mrcA; penicillin-binding protein 1A	[EC:2.4.1.129 3.4.16.4]	Peptidoglycan biosynthesis	Glycan biosynthesis and metabolism	Metabolism	GO:0005488	molecular_function	binding
OG0000301	penicillin-binding protein 1A	K05366	mrcA; penicillin-binding protein 1A	[EC:2.4.1.129 3.4.16.4]	Peptidoglycan biosynthesis	Glycan biosynthesis and metabolism	Metabolism	GO:0016757	molecular_function	glycosyltransferase activity
OG0000301	penicillin-binding protein 1A	K05366	mrcA; penicillin-binding protein 1A	[EC:2.4.1.129 3.4.16.4]	Peptidoglycan biosynthesis	Glycan biosynthesis and metabolism	Metabolism	GO:0032502	biological_process	developmental process
OG0000301	penicillin-binding protein 1A	K05366	mrcA; penicillin-binding protein 1A	[EC:2.4.1.129 3.4.16.4]	Peptidoglycan biosynthesis	Glycan biosynthesis and metabolism	Metabolism	GO:0016758	molecular_function	hexosyltransferase activity
OG0000301	penicillin-binding protein 1A	K05366	mrcA; penicillin-binding protein 1A	[EC:2.4.1.129 3.4.16.4]	Peptidoglycan biosynthesis	Glycan biosynthesis and metabolism	Metabolism	GO:0031224	cellular_component	intrinsic component of membrane
OG0000301	penicillin-binding protein 1A	K05366	mrcA; penicillin-binding protein 1A	[EC:2.4.1.129 3.4.16.4]	Peptidoglycan biosynthesis	Glycan biosynthesis and metabolism	Metabolism	GO:0070008	molecular_function	serine-type exopeptidase activity
OG0000301	penicillin-binding protein 1A	K05366	mrcA; penicillin-binding protein 1A	[EC:2.4.1.129 3.4.16.4]	Peptidoglycan biosynthesis	Glycan biosynthesis and metabolism	Metabolism	GO:0030203	biological_process	glycosaminoglycan metabolic process
OG0000301	penicillin-binding protein 1A	K05366	mrcA; penicillin-binding protein 1A	[EC:2.4.1.129 3.4.16.4]	Peptidoglycan biosynthesis	Glycan biosynthesis and metabolism	Metabolism	GO:0008955	molecular_function	peptidoglycan glycosyltransferase activity
OG0000301	penicillin-binding protein 1A	K05366	mrcA; penicillin-binding protein 1A	[EC:2.4.1.129 3.4.16.4]	Peptidoglycan biosynthesis	Glycan biosynthesis and metabolism	Metabolism	GO:0036094	molecular_function	small molecule binding
OG0000301	penicillin-binding protein 1A	K05366	mrcA; penicillin-binding protein 1A	[EC:2.4.1.129 3.4.16.4]	Peptidoglycan biosynthesis	Glycan biosynthesis and metabolism	Metabolism	GO:0005886	cellular_component	plasma membrane
OG0000301	penicillin-binding protein 1A	K05366	mrcA; penicillin-binding protein 1A	[EC:2.4.1.129 3.4.16.4]	beta-Lactam resistance	Drug resistance: antimicrobial	Human Diseases	GO:0071555	biological_process	cell wall organization
OG0000301	penicillin-binding protein 1A	K05366	mrcA; penicillin-binding protein 1A	[EC:2.4.1.129 3.4.16.4]	beta-Lactam resistance	Drug resistance: antimicrobial	Human Diseases	GO:0009987	biological_process	cellular process
OG0000301	penicillin-binding protein 1A	K05366	mrcA; penicillin-binding protein 1A	[EC:2.4.1.129 3.4.16.4]	beta-Lactam resistance	Drug resistance: antimicrobial	Human Diseases	GO:0071554	biological_process	cell wall organization or biogenesis
OG0000301	penicillin-binding protein 1A	K05366	mrcA; penicillin-binding protein 1A	[EC:2.4.1.129 3.4.16.4]	beta-Lactam resistance	Drug resistance: antimicrobial	Human Diseases	GO:0044036	biological_process	cell wall macromolecule metabolic process
OG0000301	penicillin-binding protein 1A	K05366	mrcA; penicillin-binding protein 1A	[EC:2.4.1.129 3.4.16.4]	beta-Lactam resistance	Drug resistance: antimicrobial	Human Diseases	GO:0006022	biological_process	aminoglycan metabolic process
OG0000301	penicillin-binding protein 1A	K05366	mrcA; penicillin-binding protein 1A	[EC:2.4.1.129 3.4.16.4]	beta-Lactam resistance	Drug resistance: antimicrobial	Human Diseases	GO:0044038	biological_process	cell wall macromolecule biosynthetic process
OG0000301	penicillin-binding protein 1A	K05366	mrcA; penicillin-binding protein 1A	[EC:2.4.1.129 3.4.16.4]	beta-Lactam resistance	Drug resistance: antimicrobial	Human Diseases	GO:0000902	biological_process	cell morphogenesis
OG0000301	penicillin-binding protein 1A	K05366	mrcA; penicillin-binding protein 1A	[EC:2.4.1.129 3.4.16.4]	beta-Lactam resistance	Drug resistance: antimicrobial	Human Diseases	GO:0097159	molecular_function	organic cyclic compound binding
OG0000301	penicillin-binding protein 1A	K05366	mrcA; penicillin-binding protein 1A	[EC:2.4.1.129 3.4.16.4]	beta-Lactam resistance	Drug resistance: antimicrobial	Human Diseases	GO:0006023	biological_process	aminoglycan biosynthetic process
OG0000301	penicillin-binding protein 1A	K05366	mrcA; penicillin-binding protein 1A	[EC:2.4.1.129 3.4.16.4]	beta-Lactam resistance	Drug resistance: antimicrobial	Human Diseases	GO:0006024	biological_process	glycosaminoglycan biosynthetic process
OG0000301	penicillin-binding protein 1A	K05366	mrcA; penicillin-binding protein 1A	[EC:2.4.1.129 3.4.16.4]	beta-Lactam resistance	Drug resistance: antimicrobial	Human Diseases	GO:0071944	cellular_component	cell periphery
OG0000301	penicillin-binding protein 1A	K05366	mrcA; penicillin-binding protein 1A	[EC:2.4.1.129 3.4.16.4]	beta-Lactam resistance	Drug resistance: antimicrobial	Human Diseases	GO:0033293	molecular_function	monocarboxylic acid binding
OG0000301	penicillin-binding protein 1A	K05366	mrcA; penicillin-binding protein 1A	[EC:2.4.1.129 3.4.16.4]	beta-Lactam resistance	Drug resistance: antimicrobial	Human Diseases	GO:0000270	biological_process	peptidoglycan metabolic process
OG0000301	penicillin-binding protein 1A	K05366	mrcA; penicillin-binding protein 1A	[EC:2.4.1.129 3.4.16.4]	beta-Lactam resistance	Drug resistance: antimicrobial	Human Diseases	GO:0016787	molecular_function	hydrolase activity
OG0000301	penicillin-binding protein 1A	K05366	mrcA; penicillin-binding protein 1A	[EC:2.4.1.129 3.4.16.4]	beta-Lactam resistance	Drug resistance: antimicrobial	Human Diseases	GO:0017171	molecular_function	serine hydrolase activity
OG0000301	penicillin-binding protein 1A	K05366	mrcA; penicillin-binding protein 1A	[EC:2.4.1.129 3.4.16.4]	beta-Lactam resistance	Drug resistance: antimicrobial	Human Diseases	GO:0016020	cellular_component	membrane
OG0000301	penicillin-binding protein 1A	K05366	mrcA; penicillin-binding protein 1A	[EC:2.4.1.129 3.4.16.4]	beta-Lactam resistance	Drug resistance: antimicrobial	Human Diseases	GO:1901576	biological_process	organic substance biosynthetic process
OG0000301	penicillin-binding protein 1A	K05366	mrcA; penicillin-binding protein 1A	[EC:2.4.1.129 3.4.16.4]	beta-Lactam resistance	Drug resistance: antimicrobial	Human Diseases	GO:0016021	cellular_component	integral component of membrane
OG0000301	penicillin-binding protein 1A	K05366	mrcA; penicillin-binding protein 1A	[EC:2.4.1.129 3.4.16.4]	beta-Lactam resistance	Drug resistance: antimicrobial	Human Diseases	GO:0006807	biological_process	nitrogen compound metabolic process
OG0000301	penicillin-binding protein 1A	K05366	mrcA; penicillin-binding protein 1A	[EC:2.4.1.129 3.4.16.4]	beta-Lactam resistance	Drug resistance: antimicrobial	Human Diseases	GO:0071704	biological_process	organic substance metabolic process
OG0000301	penicillin-binding protein 1A	K05366	mrcA; penicillin-binding protein 1A	[EC:2.4.1.129 3.4.16.4]	beta-Lactam resistance	Drug resistance: antimicrobial	Human Diseases	GO:0043167	molecular_function	ion binding
OG0000301	penicillin-binding protein 1A	K05366	mrcA; penicillin-binding protein 1A	[EC:2.4.1.129 3.4.16.4]	beta-Lactam resistance	Drug resistance: antimicrobial	Human Diseases	GO:0043168	molecular_function	anion binding
OG0000301	penicillin-binding protein 1A	K05366	mrcA; penicillin-binding protein 1A	[EC:2.4.1.129 3.4.16.4]	beta-Lactam resistance	Drug resistance: antimicrobial	Human Diseases	GO:0071840	biological_process	cellular component organization or biogenesis
OG0000301	penicillin-binding protein 1A	K05366	mrcA; penicillin-binding protein 1A	[EC:2.4.1.129 3.4.16.4]	beta-Lactam resistance	Drug resistance: antimicrobial	Human Diseases	GO:0043170	biological_process	macromolecule metabolic process
OG0000301	penicillin-binding protein 1A	K05366	mrcA; penicillin-binding protein 1A	[EC:2.4.1.129 3.4.16.4]	beta-Lactam resistance	Drug resistance: antimicrobial	Human Diseases	GO:0009252	biological_process	peptidoglycan biosynthetic process
OG0000301	penicillin-binding protein 1A	K05366	mrcA; penicillin-binding protein 1A	[EC:2.4.1.129 3.4.16.4]	beta-Lactam resistance	Drug resistance: antimicrobial	Human Diseases	GO:0008360	biological_process	regulation of cell shape
OG0000301	penicillin-binding protein 1A	K05366	mrcA; penicillin-binding protein 1A	[EC:2.4.1.129 3.4.16.4]	beta-Lactam resistance	Drug resistance: antimicrobial	Human Diseases	GO:0008233	molecular_function	peptidase activity
OG0000301	penicillin-binding protein 1A	K05366	mrcA; penicillin-binding protein 1A	[EC:2.4.1.129 3.4.16.4]	beta-Lactam resistance	Drug resistance: antimicrobial	Human Diseases	GO:0043177	molecular_function	organic acid binding
OG0000301	penicillin-binding protein 1A	K05366	mrcA; penicillin-binding protein 1A	[EC:2.4.1.129 3.4.16.4]	beta-Lactam resistance	Drug resistance: antimicrobial	Human Diseases	GO:0009002	molecular_function	serine-type D-Ala-D-Ala carboxypeptidase activity
OG0000301	penicillin-binding protein 1A	K05366	mrcA; penicillin-binding protein 1A	[EC:2.4.1.129 3.4.16.4]	beta-Lactam resistance	Drug resistance: antimicrobial	Human Diseases	GO:0016043	biological_process	cellular component organization
OG0000301	penicillin-binding protein 1A	K05366	mrcA; penicillin-binding protein 1A	[EC:2.4.1.129 3.4.16.4]	beta-Lactam resistance	Drug resistance: antimicrobial	Human Diseases	GO:0008236	molecular_function	serine-type peptidase activity
OG0000301	penicillin-binding protein 1A	K05366	mrcA; penicillin-binding protein 1A	[EC:2.4.1.129 3.4.16.4]	beta-Lactam resistance	Drug resistance: antimicrobial	Human Diseases	GO:0045229	biological_process	external encapsulating structure organization
OG0000301	penicillin-binding protein 1A	K05366	mrcA; penicillin-binding protein 1A	[EC:2.4.1.129 3.4.16.4]	beta-Lactam resistance	Drug resistance: antimicrobial	Human Diseases	GO:0008238	molecular_function	exopeptidase activity
OG0000301	penicillin-binding protein 1A	K05366	mrcA; penicillin-binding protein 1A	[EC:2.4.1.129 3.4.16.4]	beta-Lactam resistance	Drug resistance: antimicrobial	Human Diseases	GO:0031406	molecular_function	carboxylic acid binding
OG0000301	penicillin-binding protein 1A	K05366	mrcA; penicillin-binding protein 1A	[EC:2.4.1.129 3.4.16.4]	beta-Lactam resistance	Drug resistance: antimicrobial	Human Diseases	GO:1901363	molecular_function	heterocyclic compound binding
OG0000301	penicillin-binding protein 1A	K05366	mrcA; penicillin-binding protein 1A	[EC:2.4.1.129 3.4.16.4]	beta-Lactam resistance	Drug resistance: antimicrobial	Human Diseases	GO:0042546	biological_process	cell wall biogenesis
OG0000301	penicillin-binding protein 1A	K05366	mrcA; penicillin-binding protein 1A	[EC:2.4.1.129 3.4.16.4]	beta-Lactam resistance	Drug resistance: antimicrobial	Human Diseases	GO:0044085	biological_process	cellular component biogenesis
OG0000301	penicillin-binding protein 1A	K05366	mrcA; penicillin-binding protein 1A	[EC:2.4.1.129 3.4.16.4]	beta-Lactam resistance	Drug resistance: antimicrobial	Human Diseases	GO:0009653	biological_process	anatomical structure morphogenesis
OG0000301	penicillin-binding protein 1A	K05366	mrcA; penicillin-binding protein 1A	[EC:2.4.1.129 3.4.16.4]	beta-Lactam resistance	Drug resistance: antimicrobial	Human Diseases	GO:0009273	biological_process	peptidoglycan-based cell wall biogenesis
OG0000301	penicillin-binding protein 1A	K05366	mrcA; penicillin-binding protein 1A	[EC:2.4.1.129 3.4.16.4]	beta-Lactam resistance	Drug resistance: antimicrobial	Human Diseases	GO:0070589	biological_process	cellular component macromolecule biosynthetic process
OG0000301	penicillin-binding protein 1A	K05366	mrcA; penicillin-binding protein 1A	[EC:2.4.1.129 3.4.16.4]	beta-Lactam resistance	Drug resistance: antimicrobial	Human Diseases	GO:0140096	molecular_function	catalytic activity, acting on a protein
OG0000301	penicillin-binding protein 1A	K05366	mrcA; penicillin-binding protein 1A	[EC:2.4.1.129 3.4.16.4]	beta-Lactam resistance	Drug resistance: antimicrobial	Human Diseases	GO:0033218	molecular_function	amide binding
OG0000301	penicillin-binding protein 1A	K05366	mrcA; penicillin-binding protein 1A	[EC:2.4.1.129 3.4.16.4]	beta-Lactam resistance	Drug resistance: antimicrobial	Human Diseases	GO:0005575	cellular_component	cellular_component
OG0000301	penicillin-binding protein 1A	K05366	mrcA; penicillin-binding protein 1A	[EC:2.4.1.129 3.4.16.4]	beta-Lactam resistance	Drug resistance: antimicrobial	Human Diseases	GO:0022603	biological_process	regulation of anatomical structure morphogenesis
OG0000301	penicillin-binding protein 1A	K05366	mrcA; penicillin-binding protein 1A	[EC:2.4.1.129 3.4.16.4]	beta-Lactam resistance	Drug resistance: antimicrobial	Human Diseases	GO:1901137	biological_process	carbohydrate derivative biosynthetic process
OG0000301	penicillin-binding protein 1A	K05366	mrcA; penicillin-binding protein 1A	[EC:2.4.1.129 3.4.16.4]	beta-Lactam resistance	Drug resistance: antimicrobial	Human Diseases	GO:0022604	biological_process	regulation of cell morphogenesis
OG0000301	penicillin-binding protein 1A	K05366	mrcA; penicillin-binding protein 1A	[EC:2.4.1.129 3.4.16.4]	beta-Lactam resistance	Drug resistance: antimicrobial	Human Diseases	GO:0044237	biological_process	cellular metabolic process
OG0000301	penicillin-binding protein 1A	K05366	mrcA; penicillin-binding protein 1A	[EC:2.4.1.129 3.4.16.4]	beta-Lactam resistance	Drug resistance: antimicrobial	Human Diseases	GO:0044238	biological_process	primary metabolic process
OG0000301	penicillin-binding protein 1A	K05366	mrcA; penicillin-binding protein 1A	[EC:2.4.1.129 3.4.16.4]	beta-Lactam resistance	Drug resistance: antimicrobial	Human Diseases	GO:0050896	biological_process	response to stimulus
OG0000301	penicillin-binding protein 1A	K05366	mrcA; penicillin-binding protein 1A	[EC:2.4.1.129 3.4.16.4]	beta-Lactam resistance	Drug resistance: antimicrobial	Human Diseases	GO:1901135	biological_process	carbohydrate derivative metabolic process
OG0000301	penicillin-binding protein 1A	K05366	mrcA; penicillin-binding protein 1A	[EC:2.4.1.129 3.4.16.4]	beta-Lactam resistance	Drug resistance: antimicrobial	Human Diseases	GO:0019538	biological_process	protein metabolic process
OG0000301	penicillin-binding protein 1A	K05366	mrcA; penicillin-binding protein 1A	[EC:2.4.1.129 3.4.16.4]	beta-Lactam resistance	Drug resistance: antimicrobial	Human Diseases	GO:0008658	molecular_function	penicillin binding
OG0000301	penicillin-binding protein 1A	K05366	mrcA; penicillin-binding protein 1A	[EC:2.4.1.129 3.4.16.4]	beta-Lactam resistance	Drug resistance: antimicrobial	Human Diseases	GO:0004180	molecular_function	carboxypeptidase activity
OG0000301	penicillin-binding protein 1A	K05366	mrcA; penicillin-binding protein 1A	[EC:2.4.1.129 3.4.16.4]	beta-Lactam resistance	Drug resistance: antimicrobial	Human Diseases	GO:0110165	cellular_component	cellular anatomical entity
OG0000301	penicillin-binding protein 1A	K05366	mrcA; penicillin-binding protein 1A	[EC:2.4.1.129 3.4.16.4]	beta-Lactam resistance	Drug resistance: antimicrobial	Human Diseases	GO:0034645	biological_process	cellular macromolecule biosynthetic process
OG0000301	penicillin-binding protein 1A	K05366	mrcA; penicillin-binding protein 1A	[EC:2.4.1.129 3.4.16.4]	beta-Lactam resistance	Drug resistance: antimicrobial	Human Diseases	GO:0046677	biological_process	response to antibiotic
OG0000301	penicillin-binding protein 1A	K05366	mrcA; penicillin-binding protein 1A	[EC:2.4.1.129 3.4.16.4]	beta-Lactam resistance	Drug resistance: antimicrobial	Human Diseases	GO:0008150	biological_process	biological_process
OG0000301	penicillin-binding protein 1A	K05366	mrcA; penicillin-binding protein 1A	[EC:2.4.1.129 3.4.16.4]	beta-Lactam resistance	Drug resistance: antimicrobial	Human Diseases	GO:0008152	biological_process	metabolic process
OG0000301	penicillin-binding protein 1A	K05366	mrcA; penicillin-binding protein 1A	[EC:2.4.1.129 3.4.16.4]	beta-Lactam resistance	Drug resistance: antimicrobial	Human Diseases	GO:0048856	biological_process	anatomical structure development
OG0000301	penicillin-binding protein 1A	K05366	mrcA; penicillin-binding protein 1A	[EC:2.4.1.129 3.4.16.4]	beta-Lactam resistance	Drug resistance: antimicrobial	Human Diseases	GO:0044249	biological_process	cellular biosynthetic process
OG0000301	penicillin-binding protein 1A	K05366	mrcA; penicillin-binding protein 1A	[EC:2.4.1.129 3.4.16.4]	beta-Lactam resistance	Drug resistance: antimicrobial	Human Diseases	GO:0004185	molecular_function	serine-type carboxypeptidase activity
OG0000301	penicillin-binding protein 1A	K05366	mrcA; penicillin-binding protein 1A	[EC:2.4.1.129 3.4.16.4]	beta-Lactam resistance	Drug resistance: antimicrobial	Human Diseases	GO:0003674	molecular_function	molecular_function
OG0000301	penicillin-binding protein 1A	K05366	mrcA; penicillin-binding protein 1A	[EC:2.4.1.129 3.4.16.4]	beta-Lactam resistance	Drug resistance: antimicrobial	Human Diseases	GO:1901564	biological_process	organonitrogen compound metabolic process
OG0000301	penicillin-binding protein 1A	K05366	mrcA; penicillin-binding protein 1A	[EC:2.4.1.129 3.4.16.4]	beta-Lactam resistance	Drug resistance: antimicrobial	Human Diseases	GO:0009058	biological_process	biosynthetic process
OG0000301	penicillin-binding protein 1A	K05366	mrcA; penicillin-binding protein 1A	[EC:2.4.1.129 3.4.16.4]	beta-Lactam resistance	Drug resistance: antimicrobial	Human Diseases	GO:0009059	biological_process	macromolecule biosynthetic process
OG0000301	penicillin-binding protein 1A	K05366	mrcA; penicillin-binding protein 1A	[EC:2.4.1.129 3.4.16.4]	beta-Lactam resistance	Drug resistance: antimicrobial	Human Diseases	GO:1901566	biological_process	organonitrogen compound biosynthetic process
OG0000301	penicillin-binding protein 1A	K05366	mrcA; penicillin-binding protein 1A	[EC:2.4.1.129 3.4.16.4]	beta-Lactam resistance	Drug resistance: antimicrobial	Human Diseases	GO:0044260	biological_process	cellular macromolecule metabolic process
OG0000301	penicillin-binding protein 1A	K05366	mrcA; penicillin-binding protein 1A	[EC:2.4.1.129 3.4.16.4]	beta-Lactam resistance	Drug resistance: antimicrobial	Human Diseases	GO:0016740	molecular_function	transferase activity
OG0000301	penicillin-binding protein 1A	K05366	mrcA; penicillin-binding protein 1A	[EC:2.4.1.129 3.4.16.4]	beta-Lactam resistance	Drug resistance: antimicrobial	Human Diseases	GO:0050789	biological_process	regulation of biological process
OG0000301	penicillin-binding protein 1A	K05366	mrcA; penicillin-binding protein 1A	[EC:2.4.1.129 3.4.16.4]	beta-Lactam resistance	Drug resistance: antimicrobial	Human Diseases	GO:0050793	biological_process	regulation of developmental process
OG0000301	penicillin-binding protein 1A	K05366	mrcA; penicillin-binding protein 1A	[EC:2.4.1.129 3.4.16.4]	beta-Lactam resistance	Drug resistance: antimicrobial	Human Diseases	GO:0006508	biological_process	proteolysis
OG0000301	penicillin-binding protein 1A	K05366	mrcA; penicillin-binding protein 1A	[EC:2.4.1.129 3.4.16.4]	beta-Lactam resistance	Drug resistance: antimicrobial	Human Diseases	GO:1901681	molecular_function	sulfur compound binding
OG0000301	penicillin-binding protein 1A	K05366	mrcA; penicillin-binding protein 1A	[EC:2.4.1.129 3.4.16.4]	beta-Lactam resistance	Drug resistance: antimicrobial	Human Diseases	GO:0042221	biological_process	response to chemical
OG0000301	penicillin-binding protein 1A	K05366	mrcA; penicillin-binding protein 1A	[EC:2.4.1.129 3.4.16.4]	beta-Lactam resistance	Drug resistance: antimicrobial	Human Diseases	GO:0065007	biological_process	biological regulation
OG0000301	penicillin-binding protein 1A	K05366	mrcA; penicillin-binding protein 1A	[EC:2.4.1.129 3.4.16.4]	beta-Lactam resistance	Drug resistance: antimicrobial	Human Diseases	GO:0003824	molecular_function	catalytic activity
OG0000301	penicillin-binding protein 1A	K05366	mrcA; penicillin-binding protein 1A	[EC:2.4.1.129 3.4.16.4]	beta-Lactam resistance	Drug resistance: antimicrobial	Human Diseases	GO:0005488	molecular_function	binding
OG0000301	penicillin-binding protein 1A	K05366	mrcA; penicillin-binding protein 1A	[EC:2.4.1.129 3.4.16.4]	beta-Lactam resistance	Drug resistance: antimicrobial	Human Diseases	GO:0016757	molecular_function	glycosyltransferase activity
OG0000301	penicillin-binding protein 1A	K05366	mrcA; penicillin-binding protein 1A	[EC:2.4.1.129 3.4.16.4]	beta-Lactam resistance	Drug resistance: antimicrobial	Human Diseases	GO:0032502	biological_process	developmental process
OG0000301	penicillin-binding protein 1A	K05366	mrcA; penicillin-binding protein 1A	[EC:2.4.1.129 3.4.16.4]	beta-Lactam resistance	Drug resistance: antimicrobial	Human Diseases	GO:0016758	molecular_function	hexosyltransferase activity
OG0000301	penicillin-binding protein 1A	K05366	mrcA; penicillin-binding protein 1A	[EC:2.4.1.129 3.4.16.4]	beta-Lactam resistance	Drug resistance: antimicrobial	Human Diseases	GO:0031224	cellular_component	intrinsic component of membrane
OG0000301	penicillin-binding protein 1A	K05366	mrcA; penicillin-binding protein 1A	[EC:2.4.1.129 3.4.16.4]	beta-Lactam resistance	Drug resistance: antimicrobial	Human Diseases	GO:0070008	molecular_function	serine-type exopeptidase activity
OG0000301	penicillin-binding protein 1A	K05366	mrcA; penicillin-binding protein 1A	[EC:2.4.1.129 3.4.16.4]	beta-Lactam resistance	Drug resistance: antimicrobial	Human Diseases	GO:0030203	biological_process	glycosaminoglycan metabolic process
OG0000301	penicillin-binding protein 1A	K05366	mrcA; penicillin-binding protein 1A	[EC:2.4.1.129 3.4.16.4]	beta-Lactam resistance	Drug resistance: antimicrobial	Human Diseases	GO:0008955	molecular_function	peptidoglycan glycosyltransferase activity
OG0000301	penicillin-binding protein 1A	K05366	mrcA; penicillin-binding protein 1A	[EC:2.4.1.129 3.4.16.4]	beta-Lactam resistance	Drug resistance: antimicrobial	Human Diseases	GO:0036094	molecular_function	small molecule binding
OG0000301	penicillin-binding protein 1A	K05366	mrcA; penicillin-binding protein 1A	[EC:2.4.1.129 3.4.16.4]	beta-Lactam resistance	Drug resistance: antimicrobial	Human Diseases	GO:0005886	cellular_component	plasma membrane
OG0000311	3-deoxy-8-phosphooctulonate synthase	K01627	kdsA; 2-dehydro-3-deoxyphosphooctonate aldolase (KDO 8-P synthase)	[EC:2.5.1.55]	Lipopolysaccharide biosynthesis	Glycan biosynthesis and metabolism	Metabolism	GO:0009987	biological_process	cellular process
OG0000311	3-deoxy-8-phosphooctulonate synthase	K01627	kdsA; 2-dehydro-3-deoxyphosphooctonate aldolase (KDO 8-P synthase)	[EC:2.5.1.55]	Lipopolysaccharide biosynthesis	Glycan biosynthesis and metabolism	Metabolism	GO:1903509	biological_process	liposaccharide metabolic process
OG0000311	3-deoxy-8-phosphooctulonate synthase	K01627	kdsA; 2-dehydro-3-deoxyphosphooctonate aldolase (KDO 8-P synthase)	[EC:2.5.1.55]	Lipopolysaccharide biosynthesis	Glycan biosynthesis and metabolism	Metabolism	GO:0009103	biological_process	lipopolysaccharide biosynthetic process
OG0000311	3-deoxy-8-phosphooctulonate synthase	K01627	kdsA; 2-dehydro-3-deoxyphosphooctonate aldolase (KDO 8-P synthase)	[EC:2.5.1.55]	Lipopolysaccharide biosynthesis	Glycan biosynthesis and metabolism	Metabolism	GO:0000271	biological_process	polysaccharide biosynthetic process
OG0000311	3-deoxy-8-phosphooctulonate synthase	K01627	kdsA; 2-dehydro-3-deoxyphosphooctonate aldolase (KDO 8-P synthase)	[EC:2.5.1.55]	Lipopolysaccharide biosynthesis	Glycan biosynthesis and metabolism	Metabolism	GO:1901576	biological_process	organic substance biosynthetic process
OG0000311	3-deoxy-8-phosphooctulonate synthase	K01627	kdsA; 2-dehydro-3-deoxyphosphooctonate aldolase (KDO 8-P synthase)	[EC:2.5.1.55]	Lipopolysaccharide biosynthesis	Glycan biosynthesis and metabolism	Metabolism	GO:0071704	biological_process	organic substance metabolic process
OG0000311	3-deoxy-8-phosphooctulonate synthase	K01627	kdsA; 2-dehydro-3-deoxyphosphooctonate aldolase (KDO 8-P synthase)	[EC:2.5.1.55]	Lipopolysaccharide biosynthesis	Glycan biosynthesis and metabolism	Metabolism	GO:0033692	biological_process	cellular polysaccharide biosynthetic process
OG0000311	3-deoxy-8-phosphooctulonate synthase	K01627	kdsA; 2-dehydro-3-deoxyphosphooctonate aldolase (KDO 8-P synthase)	[EC:2.5.1.55]	Lipopolysaccharide biosynthesis	Glycan biosynthesis and metabolism	Metabolism	GO:0046364	biological_process	monosaccharide biosynthetic process
OG0000311	3-deoxy-8-phosphooctulonate synthase	K01627	kdsA; 2-dehydro-3-deoxyphosphooctonate aldolase (KDO 8-P synthase)	[EC:2.5.1.55]	Lipopolysaccharide biosynthesis	Glycan biosynthesis and metabolism	Metabolism	GO:0008610	biological_process	lipid biosynthetic process
OG0000311	3-deoxy-8-phosphooctulonate synthase	K01627	kdsA; 2-dehydro-3-deoxyphosphooctonate aldolase (KDO 8-P synthase)	[EC:2.5.1.55]	Lipopolysaccharide biosynthesis	Glycan biosynthesis and metabolism	Metabolism	GO:0043170	biological_process	macromolecule metabolic process
OG0000311	3-deoxy-8-phosphooctulonate synthase	K01627	kdsA; 2-dehydro-3-deoxyphosphooctonate aldolase (KDO 8-P synthase)	[EC:2.5.1.55]	Lipopolysaccharide biosynthesis	Glycan biosynthesis and metabolism	Metabolism	GO:0019752	biological_process	carboxylic acid metabolic process
OG0000311	3-deoxy-8-phosphooctulonate synthase	K01627	kdsA; 2-dehydro-3-deoxyphosphooctonate aldolase (KDO 8-P synthase)	[EC:2.5.1.55]	Lipopolysaccharide biosynthesis	Glycan biosynthesis and metabolism	Metabolism	GO:0043436	biological_process	oxoacid metabolic process
OG0000311	3-deoxy-8-phosphooctulonate synthase	K01627	kdsA; 2-dehydro-3-deoxyphosphooctonate aldolase (KDO 8-P synthase)	[EC:2.5.1.55]	Lipopolysaccharide biosynthesis	Glycan biosynthesis and metabolism	Metabolism	GO:0016051	biological_process	carbohydrate biosynthetic process
OG0000311	3-deoxy-8-phosphooctulonate synthase	K01627	kdsA; 2-dehydro-3-deoxyphosphooctonate aldolase (KDO 8-P synthase)	[EC:2.5.1.55]	Lipopolysaccharide biosynthesis	Glycan biosynthesis and metabolism	Metabolism	GO:0016053	biological_process	organic acid biosynthetic process
OG0000311	3-deoxy-8-phosphooctulonate synthase	K01627	kdsA; 2-dehydro-3-deoxyphosphooctonate aldolase (KDO 8-P synthase)	[EC:2.5.1.55]	Lipopolysaccharide biosynthesis	Glycan biosynthesis and metabolism	Metabolism	GO:0046394	biological_process	carboxylic acid biosynthetic process
OG0000311	3-deoxy-8-phosphooctulonate synthase	K01627	kdsA; 2-dehydro-3-deoxyphosphooctonate aldolase (KDO 8-P synthase)	[EC:2.5.1.55]	Lipopolysaccharide biosynthesis	Glycan biosynthesis and metabolism	Metabolism	GO:0046400	biological_process	keto-3-deoxy-D-manno-octulosonic acid metabolic process
OG0000311	3-deoxy-8-phosphooctulonate synthase	K01627	kdsA; 2-dehydro-3-deoxyphosphooctonate aldolase (KDO 8-P synthase)	[EC:2.5.1.55]	Lipopolysaccharide biosynthesis	Glycan biosynthesis and metabolism	Metabolism	GO:0006082	biological_process	organic acid metabolic process
OG0000311	3-deoxy-8-phosphooctulonate synthase	K01627	kdsA; 2-dehydro-3-deoxyphosphooctonate aldolase (KDO 8-P synthase)	[EC:2.5.1.55]	Lipopolysaccharide biosynthesis	Glycan biosynthesis and metabolism	Metabolism	GO:0005575	cellular_component	cellular_component
OG0000311	3-deoxy-8-phosphooctulonate synthase	K01627	kdsA; 2-dehydro-3-deoxyphosphooctonate aldolase (KDO 8-P synthase)	[EC:2.5.1.55]	Lipopolysaccharide biosynthesis	Glycan biosynthesis and metabolism	Metabolism	GO:1901137	biological_process	carbohydrate derivative biosynthetic process
OG0000311	3-deoxy-8-phosphooctulonate synthase	K01627	kdsA; 2-dehydro-3-deoxyphosphooctonate aldolase (KDO 8-P synthase)	[EC:2.5.1.55]	Lipopolysaccharide biosynthesis	Glycan biosynthesis and metabolism	Metabolism	GO:0008653	biological_process	lipopolysaccharide metabolic process
OG0000311	3-deoxy-8-phosphooctulonate synthase	K01627	kdsA; 2-dehydro-3-deoxyphosphooctonate aldolase (KDO 8-P synthase)	[EC:2.5.1.55]	Lipopolysaccharide biosynthesis	Glycan biosynthesis and metabolism	Metabolism	GO:0044237	biological_process	cellular metabolic process
OG0000311	3-deoxy-8-phosphooctulonate synthase	K01627	kdsA; 2-dehydro-3-deoxyphosphooctonate aldolase (KDO 8-P synthase)	[EC:2.5.1.55]	Lipopolysaccharide biosynthesis	Glycan biosynthesis and metabolism	Metabolism	GO:0034637	biological_process	cellular carbohydrate biosynthetic process
OG0000311	3-deoxy-8-phosphooctulonate synthase	K01627	kdsA; 2-dehydro-3-deoxyphosphooctonate aldolase (KDO 8-P synthase)	[EC:2.5.1.55]	Lipopolysaccharide biosynthesis	Glycan biosynthesis and metabolism	Metabolism	GO:0044238	biological_process	primary metabolic process
OG0000311	3-deoxy-8-phosphooctulonate synthase	K01627	kdsA; 2-dehydro-3-deoxyphosphooctonate aldolase (KDO 8-P synthase)	[EC:2.5.1.55]	Lipopolysaccharide biosynthesis	Glycan biosynthesis and metabolism	Metabolism	GO:1901135	biological_process	carbohydrate derivative metabolic process
OG0000311	3-deoxy-8-phosphooctulonate synthase	K01627	kdsA; 2-dehydro-3-deoxyphosphooctonate aldolase (KDO 8-P synthase)	[EC:2.5.1.55]	Lipopolysaccharide biosynthesis	Glycan biosynthesis and metabolism	Metabolism	GO:0110165	cellular_component	cellular anatomical entity
OG0000311	3-deoxy-8-phosphooctulonate synthase	K01627	kdsA; 2-dehydro-3-deoxyphosphooctonate aldolase (KDO 8-P synthase)	[EC:2.5.1.55]	Lipopolysaccharide biosynthesis	Glycan biosynthesis and metabolism	Metabolism	GO:0034645	biological_process	cellular macromolecule biosynthetic process
OG0000311	3-deoxy-8-phosphooctulonate synthase	K01627	kdsA; 2-dehydro-3-deoxyphosphooctonate aldolase (KDO 8-P synthase)	[EC:2.5.1.55]	Lipopolysaccharide biosynthesis	Glycan biosynthesis and metabolism	Metabolism	GO:0008150	biological_process	biological_process
OG0000311	3-deoxy-8-phosphooctulonate synthase	K01627	kdsA; 2-dehydro-3-deoxyphosphooctonate aldolase (KDO 8-P synthase)	[EC:2.5.1.55]	Lipopolysaccharide biosynthesis	Glycan biosynthesis and metabolism	Metabolism	GO:0005975	biological_process	carbohydrate metabolic process
OG0000311	3-deoxy-8-phosphooctulonate synthase	K01627	kdsA; 2-dehydro-3-deoxyphosphooctonate aldolase (KDO 8-P synthase)	[EC:2.5.1.55]	Lipopolysaccharide biosynthesis	Glycan biosynthesis and metabolism	Metabolism	GO:0008152	biological_process	metabolic process
OG0000311	3-deoxy-8-phosphooctulonate synthase	K01627	kdsA; 2-dehydro-3-deoxyphosphooctonate aldolase (KDO 8-P synthase)	[EC:2.5.1.55]	Lipopolysaccharide biosynthesis	Glycan biosynthesis and metabolism	Metabolism	GO:0005976	biological_process	polysaccharide metabolic process
OG0000311	3-deoxy-8-phosphooctulonate synthase	K01627	kdsA; 2-dehydro-3-deoxyphosphooctonate aldolase (KDO 8-P synthase)	[EC:2.5.1.55]	Lipopolysaccharide biosynthesis	Glycan biosynthesis and metabolism	Metabolism	GO:0044249	biological_process	cellular biosynthetic process
OG0000311	3-deoxy-8-phosphooctulonate synthase	K01627	kdsA; 2-dehydro-3-deoxyphosphooctonate aldolase (KDO 8-P synthase)	[EC:2.5.1.55]	Lipopolysaccharide biosynthesis	Glycan biosynthesis and metabolism	Metabolism	GO:0003674	molecular_function	molecular_function
OG0000311	3-deoxy-8-phosphooctulonate synthase	K01627	kdsA; 2-dehydro-3-deoxyphosphooctonate aldolase (KDO 8-P synthase)	[EC:2.5.1.55]	Lipopolysaccharide biosynthesis	Glycan biosynthesis and metabolism	Metabolism	GO:0019294	biological_process	keto-3-deoxy-D-manno-octulosonic acid biosynthetic process
OG0000311	3-deoxy-8-phosphooctulonate synthase	K01627	kdsA; 2-dehydro-3-deoxyphosphooctonate aldolase (KDO 8-P synthase)	[EC:2.5.1.55]	Lipopolysaccharide biosynthesis	Glycan biosynthesis and metabolism	Metabolism	GO:0044255	biological_process	cellular lipid metabolic process
OG0000311	3-deoxy-8-phosphooctulonate synthase	K01627	kdsA; 2-dehydro-3-deoxyphosphooctonate aldolase (KDO 8-P synthase)	[EC:2.5.1.55]	Lipopolysaccharide biosynthesis	Glycan biosynthesis and metabolism	Metabolism	GO:0009058	biological_process	biosynthetic process
OG0000311	3-deoxy-8-phosphooctulonate synthase	K01627	kdsA; 2-dehydro-3-deoxyphosphooctonate aldolase (KDO 8-P synthase)	[EC:2.5.1.55]	Lipopolysaccharide biosynthesis	Glycan biosynthesis and metabolism	Metabolism	GO:0009059	biological_process	macromolecule biosynthetic process
OG0000311	3-deoxy-8-phosphooctulonate synthase	K01627	kdsA; 2-dehydro-3-deoxyphosphooctonate aldolase (KDO 8-P synthase)	[EC:2.5.1.55]	Lipopolysaccharide biosynthesis	Glycan biosynthesis and metabolism	Metabolism	GO:0016740	molecular_function	transferase activity
OG0000311	3-deoxy-8-phosphooctulonate synthase	K01627	kdsA; 2-dehydro-3-deoxyphosphooctonate aldolase (KDO 8-P synthase)	[EC:2.5.1.55]	Lipopolysaccharide biosynthesis	Glycan biosynthesis and metabolism	Metabolism	GO:0008676	molecular_function	3-deoxy-8-phosphooctulonate synthase activity
OG0000311	3-deoxy-8-phosphooctulonate synthase	K01627	kdsA; 2-dehydro-3-deoxyphosphooctonate aldolase (KDO 8-P synthase)	[EC:2.5.1.55]	Lipopolysaccharide biosynthesis	Glycan biosynthesis and metabolism	Metabolism	GO:0044260	biological_process	cellular macromolecule metabolic process
OG0000311	3-deoxy-8-phosphooctulonate synthase	K01627	kdsA; 2-dehydro-3-deoxyphosphooctonate aldolase (KDO 8-P synthase)	[EC:2.5.1.55]	Lipopolysaccharide biosynthesis	Glycan biosynthesis and metabolism	Metabolism	GO:0006629	biological_process	lipid metabolic process
OG0000311	3-deoxy-8-phosphooctulonate synthase	K01627	kdsA; 2-dehydro-3-deoxyphosphooctonate aldolase (KDO 8-P synthase)	[EC:2.5.1.55]	Lipopolysaccharide biosynthesis	Glycan biosynthesis and metabolism	Metabolism	GO:0044262	biological_process	cellular carbohydrate metabolic process
OG0000311	3-deoxy-8-phosphooctulonate synthase	K01627	kdsA; 2-dehydro-3-deoxyphosphooctonate aldolase (KDO 8-P synthase)	[EC:2.5.1.55]	Lipopolysaccharide biosynthesis	Glycan biosynthesis and metabolism	Metabolism	GO:0044264	biological_process	cellular polysaccharide metabolic process
OG0000311	3-deoxy-8-phosphooctulonate synthase	K01627	kdsA; 2-dehydro-3-deoxyphosphooctonate aldolase (KDO 8-P synthase)	[EC:2.5.1.55]	Lipopolysaccharide biosynthesis	Glycan biosynthesis and metabolism	Metabolism	GO:0005737	cellular_component	cytoplasm
OG0000311	3-deoxy-8-phosphooctulonate synthase	K01627	kdsA; 2-dehydro-3-deoxyphosphooctonate aldolase (KDO 8-P synthase)	[EC:2.5.1.55]	Lipopolysaccharide biosynthesis	Glycan biosynthesis and metabolism	Metabolism	GO:0005996	biological_process	monosaccharide metabolic process
OG0000311	3-deoxy-8-phosphooctulonate synthase	K01627	kdsA; 2-dehydro-3-deoxyphosphooctonate aldolase (KDO 8-P synthase)	[EC:2.5.1.55]	Lipopolysaccharide biosynthesis	Glycan biosynthesis and metabolism	Metabolism	GO:0003824	molecular_function	catalytic activity
OG0000311	3-deoxy-8-phosphooctulonate synthase	K01627	kdsA; 2-dehydro-3-deoxyphosphooctonate aldolase (KDO 8-P synthase)	[EC:2.5.1.55]	Lipopolysaccharide biosynthesis	Glycan biosynthesis and metabolism	Metabolism	GO:0005622	cellular_component	intracellular anatomical structure
OG0000311	3-deoxy-8-phosphooctulonate synthase	K01627	kdsA; 2-dehydro-3-deoxyphosphooctonate aldolase (KDO 8-P synthase)	[EC:2.5.1.55]	Lipopolysaccharide biosynthesis	Glycan biosynthesis and metabolism	Metabolism	GO:0044281	biological_process	small molecule metabolic process
OG0000311	3-deoxy-8-phosphooctulonate synthase	K01627	kdsA; 2-dehydro-3-deoxyphosphooctonate aldolase (KDO 8-P synthase)	[EC:2.5.1.55]	Lipopolysaccharide biosynthesis	Glycan biosynthesis and metabolism	Metabolism	GO:0044283	biological_process	small molecule biosynthetic process
OG0000311	3-deoxy-8-phosphooctulonate synthase	K01627	kdsA; 2-dehydro-3-deoxyphosphooctonate aldolase (KDO 8-P synthase)	[EC:2.5.1.55]	Lipopolysaccharide biosynthesis	Glycan biosynthesis and metabolism	Metabolism	GO:0016765	molecular_function	transferase activity, transferring alkyl or aryl (other than methyl) groups
OG0000456	aconitate hydratase AcnA	K01681	ACO, acnA; aconitate hydratase	[EC:4.2.1.3]	Citrate cycle (TCA cycle)	Carbohydrate metabolism	Metabolism	GO:0006082	biological_process	organic acid metabolic process
OG0000456	aconitate hydratase AcnA	K01681	ACO, acnA; aconitate hydratase	[EC:4.2.1.3]	Citrate cycle (TCA cycle)	Carbohydrate metabolism	Metabolism	GO:0009987	biological_process	cellular process
OG0000456	aconitate hydratase AcnA	K01681	ACO, acnA; aconitate hydratase	[EC:4.2.1.3]	Citrate cycle (TCA cycle)	Carbohydrate metabolism	Metabolism	GO:0016835	molecular_function	carbon-oxygen lyase activity
OG0000456	aconitate hydratase AcnA	K01681	ACO, acnA; aconitate hydratase	[EC:4.2.1.3]	Citrate cycle (TCA cycle)	Carbohydrate metabolism	Metabolism	GO:0016836	molecular_function	hydro-lyase activity
OG0000456	aconitate hydratase AcnA	K01681	ACO, acnA; aconitate hydratase	[EC:4.2.1.3]	Citrate cycle (TCA cycle)	Carbohydrate metabolism	Metabolism	GO:0009098	biological_process	leucine biosynthetic process
OG0000456	aconitate hydratase AcnA	K01681	ACO, acnA; aconitate hydratase	[EC:4.2.1.3]	Citrate cycle (TCA cycle)	Carbohydrate metabolism	Metabolism	GO:0006091	biological_process	generation of precursor metabolites and energy
OG0000456	aconitate hydratase AcnA	K01681	ACO, acnA; aconitate hydratase	[EC:4.2.1.3]	Citrate cycle (TCA cycle)	Carbohydrate metabolism	Metabolism	GO:0008652	biological_process	cellular amino acid biosynthetic process
OG0000456	aconitate hydratase AcnA	K01681	ACO, acnA; aconitate hydratase	[EC:4.2.1.3]	Citrate cycle (TCA cycle)	Carbohydrate metabolism	Metabolism	GO:0044237	biological_process	cellular metabolic process
OG0000456	aconitate hydratase AcnA	K01681	ACO, acnA; aconitate hydratase	[EC:4.2.1.3]	Citrate cycle (TCA cycle)	Carbohydrate metabolism	Metabolism	GO:0044238	biological_process	primary metabolic process
OG0000456	aconitate hydratase AcnA	K01681	ACO, acnA; aconitate hydratase	[EC:4.2.1.3]	Citrate cycle (TCA cycle)	Carbohydrate metabolism	Metabolism	GO:0051536	molecular_function	iron-sulfur cluster binding
OG0000456	aconitate hydratase AcnA	K01681	ACO, acnA; aconitate hydratase	[EC:4.2.1.3]	Citrate cycle (TCA cycle)	Carbohydrate metabolism	Metabolism	GO:0006099	biological_process	tricarboxylic acid cycle
OG0000456	aconitate hydratase AcnA	K01681	ACO, acnA; aconitate hydratase	[EC:4.2.1.3]	Citrate cycle (TCA cycle)	Carbohydrate metabolism	Metabolism	GO:0051539	molecular_function	4 iron, 4 sulfur cluster binding
OG0000456	aconitate hydratase AcnA	K01681	ACO, acnA; aconitate hydratase	[EC:4.2.1.3]	Citrate cycle (TCA cycle)	Carbohydrate metabolism	Metabolism	GO:0051540	molecular_function	metal cluster binding
OG0000456	aconitate hydratase AcnA	K01681	ACO, acnA; aconitate hydratase	[EC:4.2.1.3]	Citrate cycle (TCA cycle)	Carbohydrate metabolism	Metabolism	GO:0045333	biological_process	cellular respiration
OG0000456	aconitate hydratase AcnA	K01681	ACO, acnA; aconitate hydratase	[EC:4.2.1.3]	Citrate cycle (TCA cycle)	Carbohydrate metabolism	Metabolism	GO:1901576	biological_process	organic substance biosynthetic process
OG0000456	aconitate hydratase AcnA	K01681	ACO, acnA; aconitate hydratase	[EC:4.2.1.3]	Citrate cycle (TCA cycle)	Carbohydrate metabolism	Metabolism	GO:0008150	biological_process	biological_process
OG0000456	aconitate hydratase AcnA	K01681	ACO, acnA; aconitate hydratase	[EC:4.2.1.3]	Citrate cycle (TCA cycle)	Carbohydrate metabolism	Metabolism	GO:0006807	biological_process	nitrogen compound metabolic process
OG0000456	aconitate hydratase AcnA	K01681	ACO, acnA; aconitate hydratase	[EC:4.2.1.3]	Citrate cycle (TCA cycle)	Carbohydrate metabolism	Metabolism	GO:0006551	biological_process	leucine metabolic process
OG0000456	aconitate hydratase AcnA	K01681	ACO, acnA; aconitate hydratase	[EC:4.2.1.3]	Citrate cycle (TCA cycle)	Carbohydrate metabolism	Metabolism	GO:0008152	biological_process	metabolic process
OG0000456	aconitate hydratase AcnA	K01681	ACO, acnA; aconitate hydratase	[EC:4.2.1.3]	Citrate cycle (TCA cycle)	Carbohydrate metabolism	Metabolism	GO:0046872	molecular_function	metal ion binding
OG0000456	aconitate hydratase AcnA	K01681	ACO, acnA; aconitate hydratase	[EC:4.2.1.3]	Citrate cycle (TCA cycle)	Carbohydrate metabolism	Metabolism	GO:0071704	biological_process	organic substance metabolic process
OG0000456	aconitate hydratase AcnA	K01681	ACO, acnA; aconitate hydratase	[EC:4.2.1.3]	Citrate cycle (TCA cycle)	Carbohydrate metabolism	Metabolism	GO:0044249	biological_process	cellular biosynthetic process
OG0000456	aconitate hydratase AcnA	K01681	ACO, acnA; aconitate hydratase	[EC:4.2.1.3]	Citrate cycle (TCA cycle)	Carbohydrate metabolism	Metabolism	GO:0003674	molecular_function	molecular_function
OG0000456	aconitate hydratase AcnA	K01681	ACO, acnA; aconitate hydratase	[EC:4.2.1.3]	Citrate cycle (TCA cycle)	Carbohydrate metabolism	Metabolism	GO:0003994	molecular_function	aconitate hydratase activity
OG0000456	aconitate hydratase AcnA	K01681	ACO, acnA; aconitate hydratase	[EC:4.2.1.3]	Citrate cycle (TCA cycle)	Carbohydrate metabolism	Metabolism	GO:0043167	molecular_function	ion binding
OG0000456	aconitate hydratase AcnA	K01681	ACO, acnA; aconitate hydratase	[EC:4.2.1.3]	Citrate cycle (TCA cycle)	Carbohydrate metabolism	Metabolism	GO:0043169	molecular_function	cation binding
OG0000456	aconitate hydratase AcnA	K01681	ACO, acnA; aconitate hydratase	[EC:4.2.1.3]	Citrate cycle (TCA cycle)	Carbohydrate metabolism	Metabolism	GO:1901564	biological_process	organonitrogen compound metabolic process
OG0000456	aconitate hydratase AcnA	K01681	ACO, acnA; aconitate hydratase	[EC:4.2.1.3]	Citrate cycle (TCA cycle)	Carbohydrate metabolism	Metabolism	GO:0009058	biological_process	biosynthetic process
OG0000456	aconitate hydratase AcnA	K01681	ACO, acnA; aconitate hydratase	[EC:4.2.1.3]	Citrate cycle (TCA cycle)	Carbohydrate metabolism	Metabolism	GO:1901566	biological_process	organonitrogen compound biosynthetic process
OG0000456	aconitate hydratase AcnA	K01681	ACO, acnA; aconitate hydratase	[EC:4.2.1.3]	Citrate cycle (TCA cycle)	Carbohydrate metabolism	Metabolism	GO:0009060	biological_process	aerobic respiration
OG0000456	aconitate hydratase AcnA	K01681	ACO, acnA; aconitate hydratase	[EC:4.2.1.3]	Citrate cycle (TCA cycle)	Carbohydrate metabolism	Metabolism	GO:0047780	molecular_function	citrate dehydratase activity
OG0000456	aconitate hydratase AcnA	K01681	ACO, acnA; aconitate hydratase	[EC:4.2.1.3]	Citrate cycle (TCA cycle)	Carbohydrate metabolism	Metabolism	GO:0019752	biological_process	carboxylic acid metabolic process
OG0000456	aconitate hydratase AcnA	K01681	ACO, acnA; aconitate hydratase	[EC:4.2.1.3]	Citrate cycle (TCA cycle)	Carbohydrate metabolism	Metabolism	GO:0015980	biological_process	energy derivation by oxidation of organic compounds
OG0000456	aconitate hydratase AcnA	K01681	ACO, acnA; aconitate hydratase	[EC:4.2.1.3]	Citrate cycle (TCA cycle)	Carbohydrate metabolism	Metabolism	GO:0043436	biological_process	oxoacid metabolic process
OG0000456	aconitate hydratase AcnA	K01681	ACO, acnA; aconitate hydratase	[EC:4.2.1.3]	Citrate cycle (TCA cycle)	Carbohydrate metabolism	Metabolism	GO:0005488	molecular_function	binding
OG0000456	aconitate hydratase AcnA	K01681	ACO, acnA; aconitate hydratase	[EC:4.2.1.3]	Citrate cycle (TCA cycle)	Carbohydrate metabolism	Metabolism	GO:0003824	molecular_function	catalytic activity
OG0000456	aconitate hydratase AcnA	K01681	ACO, acnA; aconitate hydratase	[EC:4.2.1.3]	Citrate cycle (TCA cycle)	Carbohydrate metabolism	Metabolism	GO:0016053	biological_process	organic acid biosynthetic process
OG0000456	aconitate hydratase AcnA	K01681	ACO, acnA; aconitate hydratase	[EC:4.2.1.3]	Citrate cycle (TCA cycle)	Carbohydrate metabolism	Metabolism	GO:0006520	biological_process	cellular amino acid metabolic process
OG0000456	aconitate hydratase AcnA	K01681	ACO, acnA; aconitate hydratase	[EC:4.2.1.3]	Citrate cycle (TCA cycle)	Carbohydrate metabolism	Metabolism	GO:1901605	biological_process	alpha-amino acid metabolic process
OG0000456	aconitate hydratase AcnA	K01681	ACO, acnA; aconitate hydratase	[EC:4.2.1.3]	Citrate cycle (TCA cycle)	Carbohydrate metabolism	Metabolism	GO:0009081	biological_process	branched-chain amino acid metabolic process
OG0000456	aconitate hydratase AcnA	K01681	ACO, acnA; aconitate hydratase	[EC:4.2.1.3]	Citrate cycle (TCA cycle)	Carbohydrate metabolism	Metabolism	GO:0044281	biological_process	small molecule metabolic process
OG0000456	aconitate hydratase AcnA	K01681	ACO, acnA; aconitate hydratase	[EC:4.2.1.3]	Citrate cycle (TCA cycle)	Carbohydrate metabolism	Metabolism	GO:0009082	biological_process	branched-chain amino acid biosynthetic process
OG0000456	aconitate hydratase AcnA	K01681	ACO, acnA; aconitate hydratase	[EC:4.2.1.3]	Citrate cycle (TCA cycle)	Carbohydrate metabolism	Metabolism	GO:1901607	biological_process	alpha-amino acid biosynthetic process
OG0000456	aconitate hydratase AcnA	K01681	ACO, acnA; aconitate hydratase	[EC:4.2.1.3]	Citrate cycle (TCA cycle)	Carbohydrate metabolism	Metabolism	GO:0046394	biological_process	carboxylic acid biosynthetic process
OG0000456	aconitate hydratase AcnA	K01681	ACO, acnA; aconitate hydratase	[EC:4.2.1.3]	Citrate cycle (TCA cycle)	Carbohydrate metabolism	Metabolism	GO:0044283	biological_process	small molecule biosynthetic process
OG0000456	aconitate hydratase AcnA	K01681	ACO, acnA; aconitate hydratase	[EC:4.2.1.3]	Citrate cycle (TCA cycle)	Carbohydrate metabolism	Metabolism	GO:0016829	molecular_function	lyase activity
OG0000456	aconitate hydratase AcnA	K01681	ACO, acnA; aconitate hydratase	[EC:4.2.1.3]	Glyoxylate and dicarboxylate metabolism	Carbohydrate metabolism	Metabolism	GO:0006082	biological_process	organic acid metabolic process
OG0000456	aconitate hydratase AcnA	K01681	ACO, acnA; aconitate hydratase	[EC:4.2.1.3]	Glyoxylate and dicarboxylate metabolism	Carbohydrate metabolism	Metabolism	GO:0009987	biological_process	cellular process
OG0000456	aconitate hydratase AcnA	K01681	ACO, acnA; aconitate hydratase	[EC:4.2.1.3]	Glyoxylate and dicarboxylate metabolism	Carbohydrate metabolism	Metabolism	GO:0016835	molecular_function	carbon-oxygen lyase activity
OG0000456	aconitate hydratase AcnA	K01681	ACO, acnA; aconitate hydratase	[EC:4.2.1.3]	Glyoxylate and dicarboxylate metabolism	Carbohydrate metabolism	Metabolism	GO:0016836	molecular_function	hydro-lyase activity
OG0000456	aconitate hydratase AcnA	K01681	ACO, acnA; aconitate hydratase	[EC:4.2.1.3]	Glyoxylate and dicarboxylate metabolism	Carbohydrate metabolism	Metabolism	GO:0009098	biological_process	leucine biosynthetic process
OG0000456	aconitate hydratase AcnA	K01681	ACO, acnA; aconitate hydratase	[EC:4.2.1.3]	Glyoxylate and dicarboxylate metabolism	Carbohydrate metabolism	Metabolism	GO:0006091	biological_process	generation of precursor metabolites and energy
OG0000456	aconitate hydratase AcnA	K01681	ACO, acnA; aconitate hydratase	[EC:4.2.1.3]	Glyoxylate and dicarboxylate metabolism	Carbohydrate metabolism	Metabolism	GO:0008652	biological_process	cellular amino acid biosynthetic process
OG0000456	aconitate hydratase AcnA	K01681	ACO, acnA; aconitate hydratase	[EC:4.2.1.3]	Glyoxylate and dicarboxylate metabolism	Carbohydrate metabolism	Metabolism	GO:0044237	biological_process	cellular metabolic process
OG0000456	aconitate hydratase AcnA	K01681	ACO, acnA; aconitate hydratase	[EC:4.2.1.3]	Glyoxylate and dicarboxylate metabolism	Carbohydrate metabolism	Metabolism	GO:0044238	biological_process	primary metabolic process
OG0000456	aconitate hydratase AcnA	K01681	ACO, acnA; aconitate hydratase	[EC:4.2.1.3]	Glyoxylate and dicarboxylate metabolism	Carbohydrate metabolism	Metabolism	GO:0051536	molecular_function	iron-sulfur cluster binding
OG0000456	aconitate hydratase AcnA	K01681	ACO, acnA; aconitate hydratase	[EC:4.2.1.3]	Glyoxylate and dicarboxylate metabolism	Carbohydrate metabolism	Metabolism	GO:0006099	biological_process	tricarboxylic acid cycle
OG0000456	aconitate hydratase AcnA	K01681	ACO, acnA; aconitate hydratase	[EC:4.2.1.3]	Glyoxylate and dicarboxylate metabolism	Carbohydrate metabolism	Metabolism	GO:0051539	molecular_function	4 iron, 4 sulfur cluster binding
OG0000456	aconitate hydratase AcnA	K01681	ACO, acnA; aconitate hydratase	[EC:4.2.1.3]	Glyoxylate and dicarboxylate metabolism	Carbohydrate metabolism	Metabolism	GO:0051540	molecular_function	metal cluster binding
OG0000456	aconitate hydratase AcnA	K01681	ACO, acnA; aconitate hydratase	[EC:4.2.1.3]	Glyoxylate and dicarboxylate metabolism	Carbohydrate metabolism	Metabolism	GO:0045333	biological_process	cellular respiration
OG0000456	aconitate hydratase AcnA	K01681	ACO, acnA; aconitate hydratase	[EC:4.2.1.3]	Glyoxylate and dicarboxylate metabolism	Carbohydrate metabolism	Metabolism	GO:1901576	biological_process	organic substance biosynthetic process
OG0000456	aconitate hydratase AcnA	K01681	ACO, acnA; aconitate hydratase	[EC:4.2.1.3]	Glyoxylate and dicarboxylate metabolism	Carbohydrate metabolism	Metabolism	GO:0008150	biological_process	biological_process
OG0000456	aconitate hydratase AcnA	K01681	ACO, acnA; aconitate hydratase	[EC:4.2.1.3]	Glyoxylate and dicarboxylate metabolism	Carbohydrate metabolism	Metabolism	GO:0006807	biological_process	nitrogen compound metabolic process
OG0000456	aconitate hydratase AcnA	K01681	ACO, acnA; aconitate hydratase	[EC:4.2.1.3]	Glyoxylate and dicarboxylate metabolism	Carbohydrate metabolism	Metabolism	GO:0006551	biological_process	leucine metabolic process
OG0000456	aconitate hydratase AcnA	K01681	ACO, acnA; aconitate hydratase	[EC:4.2.1.3]	Glyoxylate and dicarboxylate metabolism	Carbohydrate metabolism	Metabolism	GO:0008152	biological_process	metabolic process
OG0000456	aconitate hydratase AcnA	K01681	ACO, acnA; aconitate hydratase	[EC:4.2.1.3]	Glyoxylate and dicarboxylate metabolism	Carbohydrate metabolism	Metabolism	GO:0046872	molecular_function	metal ion binding
OG0000456	aconitate hydratase AcnA	K01681	ACO, acnA; aconitate hydratase	[EC:4.2.1.3]	Glyoxylate and dicarboxylate metabolism	Carbohydrate metabolism	Metabolism	GO:0071704	biological_process	organic substance metabolic process
OG0000456	aconitate hydratase AcnA	K01681	ACO, acnA; aconitate hydratase	[EC:4.2.1.3]	Glyoxylate and dicarboxylate metabolism	Carbohydrate metabolism	Metabolism	GO:0044249	biological_process	cellular biosynthetic process
OG0000456	aconitate hydratase AcnA	K01681	ACO, acnA; aconitate hydratase	[EC:4.2.1.3]	Glyoxylate and dicarboxylate metabolism	Carbohydrate metabolism	Metabolism	GO:0003674	molecular_function	molecular_function
OG0000456	aconitate hydratase AcnA	K01681	ACO, acnA; aconitate hydratase	[EC:4.2.1.3]	Glyoxylate and dicarboxylate metabolism	Carbohydrate metabolism	Metabolism	GO:0003994	molecular_function	aconitate hydratase activity
OG0000456	aconitate hydratase AcnA	K01681	ACO, acnA; aconitate hydratase	[EC:4.2.1.3]	Glyoxylate and dicarboxylate metabolism	Carbohydrate metabolism	Metabolism	GO:0043167	molecular_function	ion binding
OG0000456	aconitate hydratase AcnA	K01681	ACO, acnA; aconitate hydratase	[EC:4.2.1.3]	Glyoxylate and dicarboxylate metabolism	Carbohydrate metabolism	Metabolism	GO:0043169	molecular_function	cation binding
OG0000456	aconitate hydratase AcnA	K01681	ACO, acnA; aconitate hydratase	[EC:4.2.1.3]	Glyoxylate and dicarboxylate metabolism	Carbohydrate metabolism	Metabolism	GO:1901564	biological_process	organonitrogen compound metabolic process
OG0000456	aconitate hydratase AcnA	K01681	ACO, acnA; aconitate hydratase	[EC:4.2.1.3]	Glyoxylate and dicarboxylate metabolism	Carbohydrate metabolism	Metabolism	GO:0009058	biological_process	biosynthetic process
OG0000456	aconitate hydratase AcnA	K01681	ACO, acnA; aconitate hydratase	[EC:4.2.1.3]	Glyoxylate and dicarboxylate metabolism	Carbohydrate metabolism	Metabolism	GO:1901566	biological_process	organonitrogen compound biosynthetic process
OG0000456	aconitate hydratase AcnA	K01681	ACO, acnA; aconitate hydratase	[EC:4.2.1.3]	Glyoxylate and dicarboxylate metabolism	Carbohydrate metabolism	Metabolism	GO:0009060	biological_process	aerobic respiration
OG0000456	aconitate hydratase AcnA	K01681	ACO, acnA; aconitate hydratase	[EC:4.2.1.3]	Glyoxylate and dicarboxylate metabolism	Carbohydrate metabolism	Metabolism	GO:0047780	molecular_function	citrate dehydratase activity
OG0000456	aconitate hydratase AcnA	K01681	ACO, acnA; aconitate hydratase	[EC:4.2.1.3]	Glyoxylate and dicarboxylate metabolism	Carbohydrate metabolism	Metabolism	GO:0019752	biological_process	carboxylic acid metabolic process
OG0000456	aconitate hydratase AcnA	K01681	ACO, acnA; aconitate hydratase	[EC:4.2.1.3]	Glyoxylate and dicarboxylate metabolism	Carbohydrate metabolism	Metabolism	GO:0015980	biological_process	energy derivation by oxidation of organic compounds
OG0000456	aconitate hydratase AcnA	K01681	ACO, acnA; aconitate hydratase	[EC:4.2.1.3]	Glyoxylate and dicarboxylate metabolism	Carbohydrate metabolism	Metabolism	GO:0043436	biological_process	oxoacid metabolic process
OG0000456	aconitate hydratase AcnA	K01681	ACO, acnA; aconitate hydratase	[EC:4.2.1.3]	Glyoxylate and dicarboxylate metabolism	Carbohydrate metabolism	Metabolism	GO:0005488	molecular_function	binding
OG0000456	aconitate hydratase AcnA	K01681	ACO, acnA; aconitate hydratase	[EC:4.2.1.3]	Glyoxylate and dicarboxylate metabolism	Carbohydrate metabolism	Metabolism	GO:0003824	molecular_function	catalytic activity
OG0000456	aconitate hydratase AcnA	K01681	ACO, acnA; aconitate hydratase	[EC:4.2.1.3]	Glyoxylate and dicarboxylate metabolism	Carbohydrate metabolism	Metabolism	GO:0016053	biological_process	organic acid biosynthetic process
OG0000456	aconitate hydratase AcnA	K01681	ACO, acnA; aconitate hydratase	[EC:4.2.1.3]	Glyoxylate and dicarboxylate metabolism	Carbohydrate metabolism	Metabolism	GO:0006520	biological_process	cellular amino acid metabolic process
OG0000456	aconitate hydratase AcnA	K01681	ACO, acnA; aconitate hydratase	[EC:4.2.1.3]	Glyoxylate and dicarboxylate metabolism	Carbohydrate metabolism	Metabolism	GO:1901605	biological_process	alpha-amino acid metabolic process
OG0000456	aconitate hydratase AcnA	K01681	ACO, acnA; aconitate hydratase	[EC:4.2.1.3]	Glyoxylate and dicarboxylate metabolism	Carbohydrate metabolism	Metabolism	GO:0009081	biological_process	branched-chain amino acid metabolic process
OG0000456	aconitate hydratase AcnA	K01681	ACO, acnA; aconitate hydratase	[EC:4.2.1.3]	Glyoxylate and dicarboxylate metabolism	Carbohydrate metabolism	Metabolism	GO:0044281	biological_process	small molecule metabolic process
OG0000456	aconitate hydratase AcnA	K01681	ACO, acnA; aconitate hydratase	[EC:4.2.1.3]	Glyoxylate and dicarboxylate metabolism	Carbohydrate metabolism	Metabolism	GO:0009082	biological_process	branched-chain amino acid biosynthetic process
OG0000456	aconitate hydratase AcnA	K01681	ACO, acnA; aconitate hydratase	[EC:4.2.1.3]	Glyoxylate and dicarboxylate metabolism	Carbohydrate metabolism	Metabolism	GO:1901607	biological_process	alpha-amino acid biosynthetic process
OG0000456	aconitate hydratase AcnA	K01681	ACO, acnA; aconitate hydratase	[EC:4.2.1.3]	Glyoxylate and dicarboxylate metabolism	Carbohydrate metabolism	Metabolism	GO:0046394	biological_process	carboxylic acid biosynthetic process
OG0000456	aconitate hydratase AcnA	K01681	ACO, acnA; aconitate hydratase	[EC:4.2.1.3]	Glyoxylate and dicarboxylate metabolism	Carbohydrate metabolism	Metabolism	GO:0044283	biological_process	small molecule biosynthetic process
OG0000456	aconitate hydratase AcnA	K01681	ACO, acnA; aconitate hydratase	[EC:4.2.1.3]	Glyoxylate and dicarboxylate metabolism	Carbohydrate metabolism	Metabolism	GO:0016829	molecular_function	lyase activity
OG0000456	aconitate hydratase AcnA	K01681	ACO, acnA; aconitate hydratase	[EC:4.2.1.3]	Carbon fixation pathways in prokaryotes	Energy metabolism	Metabolism	GO:0006082	biological_process	organic acid metabolic process
OG0000456	aconitate hydratase AcnA	K01681	ACO, acnA; aconitate hydratase	[EC:4.2.1.3]	Carbon fixation pathways in prokaryotes	Energy metabolism	Metabolism	GO:0009987	biological_process	cellular process
OG0000456	aconitate hydratase AcnA	K01681	ACO, acnA; aconitate hydratase	[EC:4.2.1.3]	Carbon fixation pathways in prokaryotes	Energy metabolism	Metabolism	GO:0016835	molecular_function	carbon-oxygen lyase activity
OG0000456	aconitate hydratase AcnA	K01681	ACO, acnA; aconitate hydratase	[EC:4.2.1.3]	Carbon fixation pathways in prokaryotes	Energy metabolism	Metabolism	GO:0016836	molecular_function	hydro-lyase activity
OG0000456	aconitate hydratase AcnA	K01681	ACO, acnA; aconitate hydratase	[EC:4.2.1.3]	Carbon fixation pathways in prokaryotes	Energy metabolism	Metabolism	GO:0009098	biological_process	leucine biosynthetic process
OG0000456	aconitate hydratase AcnA	K01681	ACO, acnA; aconitate hydratase	[EC:4.2.1.3]	Carbon fixation pathways in prokaryotes	Energy metabolism	Metabolism	GO:0006091	biological_process	generation of precursor metabolites and energy
OG0000456	aconitate hydratase AcnA	K01681	ACO, acnA; aconitate hydratase	[EC:4.2.1.3]	Carbon fixation pathways in prokaryotes	Energy metabolism	Metabolism	GO:0008652	biological_process	cellular amino acid biosynthetic process
OG0000456	aconitate hydratase AcnA	K01681	ACO, acnA; aconitate hydratase	[EC:4.2.1.3]	Carbon fixation pathways in prokaryotes	Energy metabolism	Metabolism	GO:0044237	biological_process	cellular metabolic process
OG0000456	aconitate hydratase AcnA	K01681	ACO, acnA; aconitate hydratase	[EC:4.2.1.3]	Carbon fixation pathways in prokaryotes	Energy metabolism	Metabolism	GO:0044238	biological_process	primary metabolic process
OG0000456	aconitate hydratase AcnA	K01681	ACO, acnA; aconitate hydratase	[EC:4.2.1.3]	Carbon fixation pathways in prokaryotes	Energy metabolism	Metabolism	GO:0051536	molecular_function	iron-sulfur cluster binding
OG0000456	aconitate hydratase AcnA	K01681	ACO, acnA; aconitate hydratase	[EC:4.2.1.3]	Carbon fixation pathways in prokaryotes	Energy metabolism	Metabolism	GO:0006099	biological_process	tricarboxylic acid cycle
OG0000456	aconitate hydratase AcnA	K01681	ACO, acnA; aconitate hydratase	[EC:4.2.1.3]	Carbon fixation pathways in prokaryotes	Energy metabolism	Metabolism	GO:0051539	molecular_function	4 iron, 4 sulfur cluster binding
OG0000456	aconitate hydratase AcnA	K01681	ACO, acnA; aconitate hydratase	[EC:4.2.1.3]	Carbon fixation pathways in prokaryotes	Energy metabolism	Metabolism	GO:0051540	molecular_function	metal cluster binding
OG0000456	aconitate hydratase AcnA	K01681	ACO, acnA; aconitate hydratase	[EC:4.2.1.3]	Carbon fixation pathways in prokaryotes	Energy metabolism	Metabolism	GO:0045333	biological_process	cellular respiration
OG0000456	aconitate hydratase AcnA	K01681	ACO, acnA; aconitate hydratase	[EC:4.2.1.3]	Carbon fixation pathways in prokaryotes	Energy metabolism	Metabolism	GO:1901576	biological_process	organic substance biosynthetic process
OG0000456	aconitate hydratase AcnA	K01681	ACO, acnA; aconitate hydratase	[EC:4.2.1.3]	Carbon fixation pathways in prokaryotes	Energy metabolism	Metabolism	GO:0008150	biological_process	biological_process
OG0000456	aconitate hydratase AcnA	K01681	ACO, acnA; aconitate hydratase	[EC:4.2.1.3]	Carbon fixation pathways in prokaryotes	Energy metabolism	Metabolism	GO:0006807	biological_process	nitrogen compound metabolic process
OG0000456	aconitate hydratase AcnA	K01681	ACO, acnA; aconitate hydratase	[EC:4.2.1.3]	Carbon fixation pathways in prokaryotes	Energy metabolism	Metabolism	GO:0006551	biological_process	leucine metabolic process
OG0000456	aconitate hydratase AcnA	K01681	ACO, acnA; aconitate hydratase	[EC:4.2.1.3]	Carbon fixation pathways in prokaryotes	Energy metabolism	Metabolism	GO:0008152	biological_process	metabolic process
OG0000456	aconitate hydratase AcnA	K01681	ACO, acnA; aconitate hydratase	[EC:4.2.1.3]	Carbon fixation pathways in prokaryotes	Energy metabolism	Metabolism	GO:0046872	molecular_function	metal ion binding
OG0000456	aconitate hydratase AcnA	K01681	ACO, acnA; aconitate hydratase	[EC:4.2.1.3]	Carbon fixation pathways in prokaryotes	Energy metabolism	Metabolism	GO:0071704	biological_process	organic substance metabolic process
OG0000456	aconitate hydratase AcnA	K01681	ACO, acnA; aconitate hydratase	[EC:4.2.1.3]	Carbon fixation pathways in prokaryotes	Energy metabolism	Metabolism	GO:0044249	biological_process	cellular biosynthetic process
OG0000456	aconitate hydratase AcnA	K01681	ACO, acnA; aconitate hydratase	[EC:4.2.1.3]	Carbon fixation pathways in prokaryotes	Energy metabolism	Metabolism	GO:0003674	molecular_function	molecular_function
OG0000456	aconitate hydratase AcnA	K01681	ACO, acnA; aconitate hydratase	[EC:4.2.1.3]	Carbon fixation pathways in prokaryotes	Energy metabolism	Metabolism	GO:0003994	molecular_function	aconitate hydratase activity
OG0000456	aconitate hydratase AcnA	K01681	ACO, acnA; aconitate hydratase	[EC:4.2.1.3]	Carbon fixation pathways in prokaryotes	Energy metabolism	Metabolism	GO:0043167	molecular_function	ion binding
OG0000456	aconitate hydratase AcnA	K01681	ACO, acnA; aconitate hydratase	[EC:4.2.1.3]	Carbon fixation pathways in prokaryotes	Energy metabolism	Metabolism	GO:0043169	molecular_function	cation binding
OG0000456	aconitate hydratase AcnA	K01681	ACO, acnA; aconitate hydratase	[EC:4.2.1.3]	Carbon fixation pathways in prokaryotes	Energy metabolism	Metabolism	GO:1901564	biological_process	organonitrogen compound metabolic process
OG0000456	aconitate hydratase AcnA	K01681	ACO, acnA; aconitate hydratase	[EC:4.2.1.3]	Carbon fixation pathways in prokaryotes	Energy metabolism	Metabolism	GO:0009058	biological_process	biosynthetic process
OG0000456	aconitate hydratase AcnA	K01681	ACO, acnA; aconitate hydratase	[EC:4.2.1.3]	Carbon fixation pathways in prokaryotes	Energy metabolism	Metabolism	GO:1901566	biological_process	organonitrogen compound biosynthetic process
OG0000456	aconitate hydratase AcnA	K01681	ACO, acnA; aconitate hydratase	[EC:4.2.1.3]	Carbon fixation pathways in prokaryotes	Energy metabolism	Metabolism	GO:0009060	biological_process	aerobic respiration
OG0000456	aconitate hydratase AcnA	K01681	ACO, acnA; aconitate hydratase	[EC:4.2.1.3]	Carbon fixation pathways in prokaryotes	Energy metabolism	Metabolism	GO:0047780	molecular_function	citrate dehydratase activity
OG0000456	aconitate hydratase AcnA	K01681	ACO, acnA; aconitate hydratase	[EC:4.2.1.3]	Carbon fixation pathways in prokaryotes	Energy metabolism	Metabolism	GO:0019752	biological_process	carboxylic acid metabolic process
OG0000456	aconitate hydratase AcnA	K01681	ACO, acnA; aconitate hydratase	[EC:4.2.1.3]	Carbon fixation pathways in prokaryotes	Energy metabolism	Metabolism	GO:0015980	biological_process	energy derivation by oxidation of organic compounds
OG0000456	aconitate hydratase AcnA	K01681	ACO, acnA; aconitate hydratase	[EC:4.2.1.3]	Carbon fixation pathways in prokaryotes	Energy metabolism	Metabolism	GO:0043436	biological_process	oxoacid metabolic process
OG0000456	aconitate hydratase AcnA	K01681	ACO, acnA; aconitate hydratase	[EC:4.2.1.3]	Carbon fixation pathways in prokaryotes	Energy metabolism	Metabolism	GO:0005488	molecular_function	binding
OG0000456	aconitate hydratase AcnA	K01681	ACO, acnA; aconitate hydratase	[EC:4.2.1.3]	Carbon fixation pathways in prokaryotes	Energy metabolism	Metabolism	GO:0003824	molecular_function	catalytic activity
OG0000456	aconitate hydratase AcnA	K01681	ACO, acnA; aconitate hydratase	[EC:4.2.1.3]	Carbon fixation pathways in prokaryotes	Energy metabolism	Metabolism	GO:0016053	biological_process	organic acid biosynthetic process
OG0000456	aconitate hydratase AcnA	K01681	ACO, acnA; aconitate hydratase	[EC:4.2.1.3]	Carbon fixation pathways in prokaryotes	Energy metabolism	Metabolism	GO:0006520	biological_process	cellular amino acid metabolic process
OG0000456	aconitate hydratase AcnA	K01681	ACO, acnA; aconitate hydratase	[EC:4.2.1.3]	Carbon fixation pathways in prokaryotes	Energy metabolism	Metabolism	GO:1901605	biological_process	alpha-amino acid metabolic process
OG0000456	aconitate hydratase AcnA	K01681	ACO, acnA; aconitate hydratase	[EC:4.2.1.3]	Carbon fixation pathways in prokaryotes	Energy metabolism	Metabolism	GO:0009081	biological_process	branched-chain amino acid metabolic process
OG0000456	aconitate hydratase AcnA	K01681	ACO, acnA; aconitate hydratase	[EC:4.2.1.3]	Carbon fixation pathways in prokaryotes	Energy metabolism	Metabolism	GO:0044281	biological_process	small molecule metabolic process
OG0000456	aconitate hydratase AcnA	K01681	ACO, acnA; aconitate hydratase	[EC:4.2.1.3]	Carbon fixation pathways in prokaryotes	Energy metabolism	Metabolism	GO:0009082	biological_process	branched-chain amino acid biosynthetic process
OG0000456	aconitate hydratase AcnA	K01681	ACO, acnA; aconitate hydratase	[EC:4.2.1.3]	Carbon fixation pathways in prokaryotes	Energy metabolism	Metabolism	GO:1901607	biological_process	alpha-amino acid biosynthetic process
OG0000456	aconitate hydratase AcnA	K01681	ACO, acnA; aconitate hydratase	[EC:4.2.1.3]	Carbon fixation pathways in prokaryotes	Energy metabolism	Metabolism	GO:0046394	biological_process	carboxylic acid biosynthetic process
OG0000456	aconitate hydratase AcnA	K01681	ACO, acnA; aconitate hydratase	[EC:4.2.1.3]	Carbon fixation pathways in prokaryotes	Energy metabolism	Metabolism	GO:0044283	biological_process	small molecule biosynthetic process
OG0000456	aconitate hydratase AcnA	K01681	ACO, acnA; aconitate hydratase	[EC:4.2.1.3]	Carbon fixation pathways in prokaryotes	Energy metabolism	Metabolism	GO:0016829	molecular_function	lyase activity
OG0000472	hypothetical protein
OG0000477	ABC transporter substrate-binding protein	K10439	rbsB; ribose transport system substrate-binding protein		ABC transporters	Membrane transport	Environmental Information Processing	GO:0051234	biological_process	establishment of localization
OG0000477	ABC transporter substrate-binding protein	K10439	rbsB; ribose transport system substrate-binding protein		ABC transporters	Membrane transport	Environmental Information Processing	GO:0008643	biological_process	carbohydrate transport
OG0000477	ABC transporter substrate-binding protein	K10439	rbsB; ribose transport system substrate-binding protein		ABC transporters	Membrane transport	Environmental Information Processing	GO:0110165	cellular_component	cellular anatomical entity
OG0000477	ABC transporter substrate-binding protein	K10439	rbsB; ribose transport system substrate-binding protein		ABC transporters	Membrane transport	Environmental Information Processing	GO:0042597	cellular_component	periplasmic space
OG0000477	ABC transporter substrate-binding protein	K10439	rbsB; ribose transport system substrate-binding protein		ABC transporters	Membrane transport	Environmental Information Processing	GO:0008150	biological_process	biological_process
OG0000477	ABC transporter substrate-binding protein	K10439	rbsB; ribose transport system substrate-binding protein		ABC transporters	Membrane transport	Environmental Information Processing	GO:0071702	biological_process	organic substance transport
OG0000477	ABC transporter substrate-binding protein	K10439	rbsB; ribose transport system substrate-binding protein		ABC transporters	Membrane transport	Environmental Information Processing	GO:0005575	cellular_component	cellular_component
OG0000477	ABC transporter substrate-binding protein	K10439	rbsB; ribose transport system substrate-binding protein		ABC transporters	Membrane transport	Environmental Information Processing	GO:0006810	biological_process	transport
OG0000477	ABC transporter substrate-binding protein	K10439	rbsB; ribose transport system substrate-binding protein		ABC transporters	Membrane transport	Environmental Information Processing	GO:0051179	biological_process	localization
OG0000477	ABC transporter substrate-binding protein	K10439	rbsB; ribose transport system substrate-binding protein		Bacterial chemotaxis	Cell motility	Cellular Processes	GO:0051234	biological_process	establishment of localization
OG0000477	ABC transporter substrate-binding protein	K10439	rbsB; ribose transport system substrate-binding protein		Bacterial chemotaxis	Cell motility	Cellular Processes	GO:0008643	biological_process	carbohydrate transport
OG0000477	ABC transporter substrate-binding protein	K10439	rbsB; ribose transport system substrate-binding protein		Bacterial chemotaxis	Cell motility	Cellular Processes	GO:0110165	cellular_component	cellular anatomical entity
OG0000477	ABC transporter substrate-binding protein	K10439	rbsB; ribose transport system substrate-binding protein		Bacterial chemotaxis	Cell motility	Cellular Processes	GO:0042597	cellular_component	periplasmic space
OG0000477	ABC transporter substrate-binding protein	K10439	rbsB; ribose transport system substrate-binding protein		Bacterial chemotaxis	Cell motility	Cellular Processes	GO:0008150	biological_process	biological_process
OG0000477	ABC transporter substrate-binding protein	K10439	rbsB; ribose transport system substrate-binding protein		Bacterial chemotaxis	Cell motility	Cellular Processes	GO:0071702	biological_process	organic substance transport
OG0000477	ABC transporter substrate-binding protein	K10439	rbsB; ribose transport system substrate-binding protein		Bacterial chemotaxis	Cell motility	Cellular Processes	GO:0005575	cellular_component	cellular_component
OG0000477	ABC transporter substrate-binding protein	K10439	rbsB; ribose transport system substrate-binding protein		Bacterial chemotaxis	Cell motility	Cellular Processes	GO:0006810	biological_process	transport
OG0000477	ABC transporter substrate-binding protein	K10439	rbsB; ribose transport system substrate-binding protein		Bacterial chemotaxis	Cell motility	Cellular Processes	GO:0051179	biological_process	localization
OG0000489	aromatic-ring-hydroxylating dioxygenase subunit beta	K18243	nagH; salicylate 5-hydroxylase small subunit	[EC:1.14.13.172]	Naphthalene degradation	Xenobiotics biodegradation and metabolism	Metabolism	GO:0003824	molecular_function	catalytic activity
OG0000489	aromatic-ring-hydroxylating dioxygenase subunit beta	K18243	nagH; salicylate 5-hydroxylase small subunit	[EC:1.14.13.172]	Naphthalene degradation	Xenobiotics biodegradation and metabolism	Metabolism	GO:0009987	biological_process	cellular process
OG0000489	aromatic-ring-hydroxylating dioxygenase subunit beta	K18243	nagH; salicylate 5-hydroxylase small subunit	[EC:1.14.13.172]	Naphthalene degradation	Xenobiotics biodegradation and metabolism	Metabolism	GO:0006725	biological_process	cellular aromatic compound metabolic process
OG0000489	aromatic-ring-hydroxylating dioxygenase subunit beta	K18243	nagH; salicylate 5-hydroxylase small subunit	[EC:1.14.13.172]	Naphthalene degradation	Xenobiotics biodegradation and metabolism	Metabolism	GO:0008150	biological_process	biological_process
OG0000489	aromatic-ring-hydroxylating dioxygenase subunit beta	K18243	nagH; salicylate 5-hydroxylase small subunit	[EC:1.14.13.172]	Naphthalene degradation	Xenobiotics biodegradation and metabolism	Metabolism	GO:0008152	biological_process	metabolic process
OG0000489	aromatic-ring-hydroxylating dioxygenase subunit beta	K18243	nagH; salicylate 5-hydroxylase small subunit	[EC:1.14.13.172]	Naphthalene degradation	Xenobiotics biodegradation and metabolism	Metabolism	GO:0003674	molecular_function	molecular_function
OG0000489	aromatic-ring-hydroxylating dioxygenase subunit beta	K18243	nagH; salicylate 5-hydroxylase small subunit	[EC:1.14.13.172]	Naphthalene degradation	Xenobiotics biodegradation and metabolism	Metabolism	GO:0016491	molecular_function	oxidoreductase activity
OG0000489	aromatic-ring-hydroxylating dioxygenase subunit beta	K18243	nagH; salicylate 5-hydroxylase small subunit	[EC:1.14.13.172]	Naphthalene degradation	Xenobiotics biodegradation and metabolism	Metabolism	GO:0044237	biological_process	cellular metabolic process
OG0000489	aromatic-ring-hydroxylating dioxygenase subunit beta	K18243	nagH; salicylate 5-hydroxylase small subunit	[EC:1.14.13.172]	Naphthalene degradation	Xenobiotics biodegradation and metabolism	Metabolism	GO:0051213	molecular_function	dioxygenase activity
OG0000512	siderophore-interacting protein							GO:0003824	molecular_function	catalytic activity
OG0000512	siderophore-interacting protein							GO:0003674	molecular_function	molecular_function
OG0000512	siderophore-interacting protein							GO:0016491	molecular_function	oxidoreductase activity
OG0000514	PRC-barrel domain containing protein
OG0000520	NIPSNAP family protein
OG0000525	DUF3455 domain-containing protein
OG0000543	DeoR/GlpR family DNA-binding transcription regulator							GO:0009987	biological_process	cellular process
OG0000543	DeoR/GlpR family DNA-binding transcription regulator							GO:0032774	biological_process	RNA biosynthetic process
OG0000543	DeoR/GlpR family DNA-binding transcription regulator							GO:0097159	molecular_function	organic cyclic compound binding
OG0000543	DeoR/GlpR family DNA-binding transcription regulator							GO:1903506	biological_process	regulation of nucleic acid-templated transcription
OG0000543	DeoR/GlpR family DNA-binding transcription regulator							GO:0046483	biological_process	heterocycle metabolic process
OG0000543	DeoR/GlpR family DNA-binding transcription regulator							GO:0019219	biological_process	regulation of nucleobase-containing compound metabolic process
OG0000543	DeoR/GlpR family DNA-binding transcription regulator							GO:1901576	biological_process	organic substance biosynthetic process
OG0000543	DeoR/GlpR family DNA-binding transcription regulator							GO:0019222	biological_process	regulation of metabolic process
OG0000543	DeoR/GlpR family DNA-binding transcription regulator							GO:0006807	biological_process	nitrogen compound metabolic process
OG0000543	DeoR/GlpR family DNA-binding transcription regulator							GO:0071704	biological_process	organic substance metabolic process
OG0000543	DeoR/GlpR family DNA-binding transcription regulator							GO:0009889	biological_process	regulation of biosynthetic process
OG0000543	DeoR/GlpR family DNA-binding transcription regulator							GO:0043170	biological_process	macromolecule metabolic process
OG0000543	DeoR/GlpR family DNA-binding transcription regulator							GO:1901360	biological_process	organic cyclic compound metabolic process
OG0000543	DeoR/GlpR family DNA-binding transcription regulator							GO:1901363	molecular_function	heterocyclic compound binding
OG0000543	DeoR/GlpR family DNA-binding transcription regulator							GO:1901362	biological_process	organic cyclic compound biosynthetic process
OG0000543	DeoR/GlpR family DNA-binding transcription regulator							GO:0051252	biological_process	regulation of RNA metabolic process
OG0000543	DeoR/GlpR family DNA-binding transcription regulator							GO:0010556	biological_process	regulation of macromolecule biosynthetic process
OG0000543	DeoR/GlpR family DNA-binding transcription regulator							GO:0090304	biological_process	nucleic acid metabolic process
OG0000543	DeoR/GlpR family DNA-binding transcription regulator							GO:0006725	biological_process	cellular aromatic compound metabolic process
OG0000543	DeoR/GlpR family DNA-binding transcription regulator							GO:0016070	biological_process	RNA metabolic process
OG0000543	DeoR/GlpR family DNA-binding transcription regulator							GO:0140110	molecular_function	transcription regulator activity
OG0000543	DeoR/GlpR family DNA-binding transcription regulator							GO:0044237	biological_process	cellular metabolic process
OG0000543	DeoR/GlpR family DNA-binding transcription regulator							GO:0044238	biological_process	primary metabolic process
OG0000543	DeoR/GlpR family DNA-binding transcription regulator							GO:0006351	biological_process	DNA-templated transcription
OG0000543	DeoR/GlpR family DNA-binding transcription regulator							GO:0034641	biological_process	cellular nitrogen compound metabolic process
OG0000543	DeoR/GlpR family DNA-binding transcription regulator							GO:0018130	biological_process	heterocycle biosynthetic process
OG0000543	DeoR/GlpR family DNA-binding transcription regulator							GO:0006355	biological_process	regulation of DNA-templated transcription
OG0000543	DeoR/GlpR family DNA-binding transcription regulator							GO:0008150	biological_process	biological_process
OG0000543	DeoR/GlpR family DNA-binding transcription regulator							GO:0008152	biological_process	metabolic process
OG0000543	DeoR/GlpR family DNA-binding transcription regulator							GO:0044249	biological_process	cellular biosynthetic process
OG0000543	DeoR/GlpR family DNA-binding transcription regulator							GO:0003674	molecular_function	molecular_function
OG0000543	DeoR/GlpR family DNA-binding transcription regulator							GO:0031323	biological_process	regulation of cellular metabolic process
OG0000543	DeoR/GlpR family DNA-binding transcription regulator							GO:0080090	biological_process	regulation of primary metabolic process
OG0000543	DeoR/GlpR family DNA-binding transcription regulator							GO:0003676	molecular_function	nucleic acid binding
OG0000543	DeoR/GlpR family DNA-binding transcription regulator							GO:0003677	molecular_function	DNA binding
OG0000543	DeoR/GlpR family DNA-binding transcription regulator							GO:0034654	biological_process	nucleobase-containing compound biosynthetic process
OG0000543	DeoR/GlpR family DNA-binding transcription regulator							GO:0031326	biological_process	regulation of cellular biosynthetic process
OG0000543	DeoR/GlpR family DNA-binding transcription regulator							GO:0060255	biological_process	regulation of macromolecule metabolic process
OG0000543	DeoR/GlpR family DNA-binding transcription regulator							GO:0009058	biological_process	biosynthetic process
OG0000543	DeoR/GlpR family DNA-binding transcription regulator							GO:0010467	biological_process	gene expression
OG0000543	DeoR/GlpR family DNA-binding transcription regulator							GO:0009059	biological_process	macromolecule biosynthetic process
OG0000543	DeoR/GlpR family DNA-binding transcription regulator							GO:0051171	biological_process	regulation of nitrogen compound metabolic process
OG0000543	DeoR/GlpR family DNA-binding transcription regulator							GO:0010468	biological_process	regulation of gene expression
OG0000543	DeoR/GlpR family DNA-binding transcription regulator							GO:0050789	biological_process	regulation of biological process
OG0000543	DeoR/GlpR family DNA-binding transcription regulator							GO:0050794	biological_process	regulation of cellular process
OG0000543	DeoR/GlpR family DNA-binding transcription regulator							GO:2001141	biological_process	regulation of RNA biosynthetic process
OG0000543	DeoR/GlpR family DNA-binding transcription regulator							GO:0019438	biological_process	aromatic compound biosynthetic process
OG0000543	DeoR/GlpR family DNA-binding transcription regulator							GO:0044271	biological_process	cellular nitrogen compound biosynthetic process
OG0000543	DeoR/GlpR family DNA-binding transcription regulator							GO:0065007	biological_process	biological regulation
OG0000543	DeoR/GlpR family DNA-binding transcription regulator							GO:0005488	molecular_function	binding
OG0000543	DeoR/GlpR family DNA-binding transcription regulator							GO:0003700	molecular_function	DNA-binding transcription factor activity
OG0000543	DeoR/GlpR family DNA-binding transcription regulator							GO:0097659	biological_process	nucleic acid-templated transcription
OG0000543	DeoR/GlpR family DNA-binding transcription regulator							GO:0006139	biological_process	nucleobase-containing compound metabolic process
OG0000562	4-hydroxythreonine-4-phosphate dehydrogenase PdxA							GO:0009987	biological_process	cellular process
OG0000562	4-hydroxythreonine-4-phosphate dehydrogenase PdxA							GO:0016772	molecular_function	transferase activity, transferring phosphorus-containing groups
OG0000562	4-hydroxythreonine-4-phosphate dehydrogenase PdxA							GO:0097159	molecular_function	organic cyclic compound binding
OG0000562	4-hydroxythreonine-4-phosphate dehydrogenase PdxA							GO:0006793	biological_process	phosphorus metabolic process
OG0000562	4-hydroxythreonine-4-phosphate dehydrogenase PdxA							GO:1901265	molecular_function	nucleoside phosphate binding
OG0000562	4-hydroxythreonine-4-phosphate dehydrogenase PdxA							GO:0006796	biological_process	phosphate-containing compound metabolic process
OG0000562	4-hydroxythreonine-4-phosphate dehydrogenase PdxA							GO:0044237	biological_process	cellular metabolic process
OG0000562	4-hydroxythreonine-4-phosphate dehydrogenase PdxA							GO:0044238	biological_process	primary metabolic process
OG0000562	4-hydroxythreonine-4-phosphate dehydrogenase PdxA							GO:0005524	molecular_function	ATP binding
OG0000562	4-hydroxythreonine-4-phosphate dehydrogenase PdxA							GO:0097367	molecular_function	carbohydrate derivative binding
OG0000562	4-hydroxythreonine-4-phosphate dehydrogenase PdxA							GO:0008150	biological_process	biological_process
OG0000562	4-hydroxythreonine-4-phosphate dehydrogenase PdxA							GO:0005975	biological_process	carbohydrate metabolic process
OG0000562	4-hydroxythreonine-4-phosphate dehydrogenase PdxA							GO:0051287	molecular_function	NAD binding
OG0000562	4-hydroxythreonine-4-phosphate dehydrogenase PdxA							GO:0008152	biological_process	metabolic process
OG0000562	4-hydroxythreonine-4-phosphate dehydrogenase PdxA							GO:0046872	molecular_function	metal ion binding
OG0000562	4-hydroxythreonine-4-phosphate dehydrogenase PdxA							GO:0071704	biological_process	organic substance metabolic process
OG0000562	4-hydroxythreonine-4-phosphate dehydrogenase PdxA							GO:0003674	molecular_function	molecular_function
OG0000562	4-hydroxythreonine-4-phosphate dehydrogenase PdxA							GO:0030554	molecular_function	adenyl nucleotide binding
OG0000562	4-hydroxythreonine-4-phosphate dehydrogenase PdxA							GO:0043167	molecular_function	ion binding
OG0000562	4-hydroxythreonine-4-phosphate dehydrogenase PdxA							GO:0043168	molecular_function	anion binding
OG0000562	4-hydroxythreonine-4-phosphate dehydrogenase PdxA							GO:0043169	molecular_function	cation binding
OG0000562	4-hydroxythreonine-4-phosphate dehydrogenase PdxA							GO:0016740	molecular_function	transferase activity
OG0000562	4-hydroxythreonine-4-phosphate dehydrogenase PdxA							GO:0000166	molecular_function	nucleotide binding
OG0000562	4-hydroxythreonine-4-phosphate dehydrogenase PdxA							GO:0032553	molecular_function	ribonucleotide binding
OG0000562	4-hydroxythreonine-4-phosphate dehydrogenase PdxA							GO:0032555	molecular_function	purine ribonucleotide binding
OG0000562	4-hydroxythreonine-4-phosphate dehydrogenase PdxA							GO:0016491	molecular_function	oxidoreductase activity
OG0000562	4-hydroxythreonine-4-phosphate dehydrogenase PdxA							GO:0016301	molecular_function	kinase activity
OG0000562	4-hydroxythreonine-4-phosphate dehydrogenase PdxA							GO:1901363	molecular_function	heterocyclic compound binding
OG0000562	4-hydroxythreonine-4-phosphate dehydrogenase PdxA							GO:0032559	molecular_function	adenyl ribonucleotide binding
OG0000562	4-hydroxythreonine-4-phosphate dehydrogenase PdxA							GO:0003824	molecular_function	catalytic activity
OG0000562	4-hydroxythreonine-4-phosphate dehydrogenase PdxA							GO:0005488	molecular_function	binding
OG0000562	4-hydroxythreonine-4-phosphate dehydrogenase PdxA							GO:0017076	molecular_function	purine nucleotide binding
OG0000562	4-hydroxythreonine-4-phosphate dehydrogenase PdxA							GO:0016310	biological_process	phosphorylation
OG0000562	4-hydroxythreonine-4-phosphate dehydrogenase PdxA							GO:0035639	molecular_function	purine ribonucleoside triphosphate binding
OG0000562	4-hydroxythreonine-4-phosphate dehydrogenase PdxA							GO:0036094	molecular_function	small molecule binding
OG0000585	enoyl-CoA hydratase/isomerase family protein	K13766	liuC; methylglutaconyl-CoA hydratase	[EC:4.2.1.18]	Valine, leucine and isoleucine degradation	Amino acid metabolism	Metabolism	GO:0003824	molecular_function	catalytic activity
OG0000585	enoyl-CoA hydratase/isomerase family protein	K13766	liuC; methylglutaconyl-CoA hydratase	[EC:4.2.1.18]	Valine, leucine and isoleucine degradation	Amino acid metabolism	Metabolism	GO:0016835	molecular_function	carbon-oxygen lyase activity
OG0000585	enoyl-CoA hydratase/isomerase family protein	K13766	liuC; methylglutaconyl-CoA hydratase	[EC:4.2.1.18]	Valine, leucine and isoleucine degradation	Amino acid metabolism	Metabolism	GO:0110165	cellular_component	cellular anatomical entity
OG0000585	enoyl-CoA hydratase/isomerase family protein	K13766	liuC; methylglutaconyl-CoA hydratase	[EC:4.2.1.18]	Valine, leucine and isoleucine degradation	Amino acid metabolism	Metabolism	GO:0016836	molecular_function	hydro-lyase activity
OG0000585	enoyl-CoA hydratase/isomerase family protein	K13766	liuC; methylglutaconyl-CoA hydratase	[EC:4.2.1.18]	Valine, leucine and isoleucine degradation	Amino acid metabolism	Metabolism	GO:0016853	molecular_function	isomerase activity
OG0000585	enoyl-CoA hydratase/isomerase family protein	K13766	liuC; methylglutaconyl-CoA hydratase	[EC:4.2.1.18]	Valine, leucine and isoleucine degradation	Amino acid metabolism	Metabolism	GO:0005622	cellular_component	intracellular anatomical structure
OG0000585	enoyl-CoA hydratase/isomerase family protein	K13766	liuC; methylglutaconyl-CoA hydratase	[EC:4.2.1.18]	Valine, leucine and isoleucine degradation	Amino acid metabolism	Metabolism	GO:0005575	cellular_component	cellular_component
OG0000585	enoyl-CoA hydratase/isomerase family protein	K13766	liuC; methylglutaconyl-CoA hydratase	[EC:4.2.1.18]	Valine, leucine and isoleucine degradation	Amino acid metabolism	Metabolism	GO:0005737	cellular_component	cytoplasm
OG0000585	enoyl-CoA hydratase/isomerase family protein	K13766	liuC; methylglutaconyl-CoA hydratase	[EC:4.2.1.18]	Valine, leucine and isoleucine degradation	Amino acid metabolism	Metabolism	GO:0003674	molecular_function	molecular_function
OG0000585	enoyl-CoA hydratase/isomerase family protein	K13766	liuC; methylglutaconyl-CoA hydratase	[EC:4.2.1.18]	Valine, leucine and isoleucine degradation	Amino acid metabolism	Metabolism	GO:0004300	molecular_function	enoyl-CoA hydratase activity
OG0000585	enoyl-CoA hydratase/isomerase family protein	K13766	liuC; methylglutaconyl-CoA hydratase	[EC:4.2.1.18]	Valine, leucine and isoleucine degradation	Amino acid metabolism	Metabolism	GO:0016829	molecular_function	lyase activity
OG0000617	questin oxidase family protein							GO:0003824	molecular_function	catalytic activity
OG0000617	questin oxidase family protein							GO:0003674	molecular_function	molecular_function
OG0000617	questin oxidase family protein							GO:0016491	molecular_function	oxidoreductase activity
OG0000635	alanine--tRNA ligase	K01872	AARS, alaS; alanyl-tRNA synthetase	[EC:6.1.1.7]	Aminoacyl-tRNA biosynthesis	Translation	Genetic Information Processing	GO:0009987	biological_process	cellular process
OG0000635	alanine--tRNA ligase	K01872	AARS, alaS; alanyl-tRNA synthetase	[EC:6.1.1.7]	Aminoacyl-tRNA biosynthesis	Translation	Genetic Information Processing	GO:0097159	molecular_function	organic cyclic compound binding
OG0000635	alanine--tRNA ligase	K01872	AARS, alaS; alanyl-tRNA synthetase	[EC:6.1.1.7]	Aminoacyl-tRNA biosynthesis	Translation	Genetic Information Processing	GO:0003723	molecular_function	RNA binding
OG0000635	alanine--tRNA ligase	K01872	AARS, alaS; alanyl-tRNA synthetase	[EC:6.1.1.7]	Aminoacyl-tRNA biosynthesis	Translation	Genetic Information Processing	GO:0006412	biological_process	translation
OG0000635	alanine--tRNA ligase	K01872	AARS, alaS; alanyl-tRNA synthetase	[EC:6.1.1.7]	Aminoacyl-tRNA biosynthesis	Translation	Genetic Information Processing	GO:0006418	biological_process	tRNA aminoacylation for protein translation
OG0000635	alanine--tRNA ligase	K01872	AARS, alaS; alanyl-tRNA synthetase	[EC:6.1.1.7]	Aminoacyl-tRNA biosynthesis	Translation	Genetic Information Processing	GO:0006419	biological_process	alanyl-tRNA aminoacylation
OG0000635	alanine--tRNA ligase	K01872	AARS, alaS; alanyl-tRNA synthetase	[EC:6.1.1.7]	Aminoacyl-tRNA biosynthesis	Translation	Genetic Information Processing	GO:0046483	biological_process	heterocycle metabolic process
OG0000635	alanine--tRNA ligase	K01872	AARS, alaS; alanyl-tRNA synthetase	[EC:6.1.1.7]	Aminoacyl-tRNA biosynthesis	Translation	Genetic Information Processing	GO:0005524	molecular_function	ATP binding
OG0000635	alanine--tRNA ligase	K01872	AARS, alaS; alanyl-tRNA synthetase	[EC:6.1.1.7]	Aminoacyl-tRNA biosynthesis	Translation	Genetic Information Processing	GO:1901576	biological_process	organic substance biosynthetic process
OG0000635	alanine--tRNA ligase	K01872	AARS, alaS; alanyl-tRNA synthetase	[EC:6.1.1.7]	Aminoacyl-tRNA biosynthesis	Translation	Genetic Information Processing	GO:0006807	biological_process	nitrogen compound metabolic process
OG0000635	alanine--tRNA ligase	K01872	AARS, alaS; alanyl-tRNA synthetase	[EC:6.1.1.7]	Aminoacyl-tRNA biosynthesis	Translation	Genetic Information Processing	GO:0046872	molecular_function	metal ion binding
OG0000635	alanine--tRNA ligase	K01872	AARS, alaS; alanyl-tRNA synthetase	[EC:6.1.1.7]	Aminoacyl-tRNA biosynthesis	Translation	Genetic Information Processing	GO:0071704	biological_process	organic substance metabolic process
OG0000635	alanine--tRNA ligase	K01872	AARS, alaS; alanyl-tRNA synthetase	[EC:6.1.1.7]	Aminoacyl-tRNA biosynthesis	Translation	Genetic Information Processing	GO:0043038	biological_process	amino acid activation
OG0000635	alanine--tRNA ligase	K01872	AARS, alaS; alanyl-tRNA synthetase	[EC:6.1.1.7]	Aminoacyl-tRNA biosynthesis	Translation	Genetic Information Processing	GO:0043167	molecular_function	ion binding
OG0000635	alanine--tRNA ligase	K01872	AARS, alaS; alanyl-tRNA synthetase	[EC:6.1.1.7]	Aminoacyl-tRNA biosynthesis	Translation	Genetic Information Processing	GO:0043039	biological_process	tRNA aminoacylation
OG0000635	alanine--tRNA ligase	K01872	AARS, alaS; alanyl-tRNA synthetase	[EC:6.1.1.7]	Aminoacyl-tRNA biosynthesis	Translation	Genetic Information Processing	GO:0043168	molecular_function	anion binding
OG0000635	alanine--tRNA ligase	K01872	AARS, alaS; alanyl-tRNA synthetase	[EC:6.1.1.7]	Aminoacyl-tRNA biosynthesis	Translation	Genetic Information Processing	GO:0043169	molecular_function	cation binding
OG0000635	alanine--tRNA ligase	K01872	AARS, alaS; alanyl-tRNA synthetase	[EC:6.1.1.7]	Aminoacyl-tRNA biosynthesis	Translation	Genetic Information Processing	GO:0043170	biological_process	macromolecule metabolic process
OG0000635	alanine--tRNA ligase	K01872	AARS, alaS; alanyl-tRNA synthetase	[EC:6.1.1.7]	Aminoacyl-tRNA biosynthesis	Translation	Genetic Information Processing	GO:0043043	biological_process	peptide biosynthetic process
OG0000635	alanine--tRNA ligase	K01872	AARS, alaS; alanyl-tRNA synthetase	[EC:6.1.1.7]	Aminoacyl-tRNA biosynthesis	Translation	Genetic Information Processing	GO:0000166	molecular_function	nucleotide binding
OG0000635	alanine--tRNA ligase	K01872	AARS, alaS; alanyl-tRNA synthetase	[EC:6.1.1.7]	Aminoacyl-tRNA biosynthesis	Translation	Genetic Information Processing	GO:0019752	biological_process	carboxylic acid metabolic process
OG0000635	alanine--tRNA ligase	K01872	AARS, alaS; alanyl-tRNA synthetase	[EC:6.1.1.7]	Aminoacyl-tRNA biosynthesis	Translation	Genetic Information Processing	GO:0032553	molecular_function	ribonucleotide binding
OG0000635	alanine--tRNA ligase	K01872	AARS, alaS; alanyl-tRNA synthetase	[EC:6.1.1.7]	Aminoacyl-tRNA biosynthesis	Translation	Genetic Information Processing	GO:0032555	molecular_function	purine ribonucleotide binding
OG0000635	alanine--tRNA ligase	K01872	AARS, alaS; alanyl-tRNA synthetase	[EC:6.1.1.7]	Aminoacyl-tRNA biosynthesis	Translation	Genetic Information Processing	GO:0043436	biological_process	oxoacid metabolic process
OG0000635	alanine--tRNA ligase	K01872	AARS, alaS; alanyl-tRNA synthetase	[EC:6.1.1.7]	Aminoacyl-tRNA biosynthesis	Translation	Genetic Information Processing	GO:1901360	biological_process	organic cyclic compound metabolic process
OG0000635	alanine--tRNA ligase	K01872	AARS, alaS; alanyl-tRNA synthetase	[EC:6.1.1.7]	Aminoacyl-tRNA biosynthesis	Translation	Genetic Information Processing	GO:1901363	molecular_function	heterocyclic compound binding
OG0000635	alanine--tRNA ligase	K01872	AARS, alaS; alanyl-tRNA synthetase	[EC:6.1.1.7]	Aminoacyl-tRNA biosynthesis	Translation	Genetic Information Processing	GO:0032559	molecular_function	adenyl ribonucleotide binding
OG0000635	alanine--tRNA ligase	K01872	AARS, alaS; alanyl-tRNA synthetase	[EC:6.1.1.7]	Aminoacyl-tRNA biosynthesis	Translation	Genetic Information Processing	GO:0000049	molecular_function	tRNA binding
OG0000635	alanine--tRNA ligase	K01872	AARS, alaS; alanyl-tRNA synthetase	[EC:6.1.1.7]	Aminoacyl-tRNA biosynthesis	Translation	Genetic Information Processing	GO:0017076	molecular_function	purine nucleotide binding
OG0000635	alanine--tRNA ligase	K01872	AARS, alaS; alanyl-tRNA synthetase	[EC:6.1.1.7]	Aminoacyl-tRNA biosynthesis	Translation	Genetic Information Processing	GO:0035639	molecular_function	purine ribonucleoside triphosphate binding
OG0000635	alanine--tRNA ligase	K01872	AARS, alaS; alanyl-tRNA synthetase	[EC:6.1.1.7]	Aminoacyl-tRNA biosynthesis	Translation	Genetic Information Processing	GO:0140098	molecular_function	catalytic activity, acting on RNA
OG0000635	alanine--tRNA ligase	K01872	AARS, alaS; alanyl-tRNA synthetase	[EC:6.1.1.7]	Aminoacyl-tRNA biosynthesis	Translation	Genetic Information Processing	GO:0090304	biological_process	nucleic acid metabolic process
OG0000635	alanine--tRNA ligase	K01872	AARS, alaS; alanyl-tRNA synthetase	[EC:6.1.1.7]	Aminoacyl-tRNA biosynthesis	Translation	Genetic Information Processing	GO:0046914	molecular_function	transition metal ion binding
OG0000635	alanine--tRNA ligase	K01872	AARS, alaS; alanyl-tRNA synthetase	[EC:6.1.1.7]	Aminoacyl-tRNA biosynthesis	Translation	Genetic Information Processing	GO:0006082	biological_process	organic acid metabolic process
OG0000635	alanine--tRNA ligase	K01872	AARS, alaS; alanyl-tRNA synthetase	[EC:6.1.1.7]	Aminoacyl-tRNA biosynthesis	Translation	Genetic Information Processing	GO:0006725	biological_process	cellular aromatic compound metabolic process
OG0000635	alanine--tRNA ligase	K01872	AARS, alaS; alanyl-tRNA synthetase	[EC:6.1.1.7]	Aminoacyl-tRNA biosynthesis	Translation	Genetic Information Processing	GO:0016070	biological_process	RNA metabolic process
OG0000635	alanine--tRNA ligase	K01872	AARS, alaS; alanyl-tRNA synthetase	[EC:6.1.1.7]	Aminoacyl-tRNA biosynthesis	Translation	Genetic Information Processing	GO:0005575	cellular_component	cellular_component
OG0000635	alanine--tRNA ligase	K01872	AARS, alaS; alanyl-tRNA synthetase	[EC:6.1.1.7]	Aminoacyl-tRNA biosynthesis	Translation	Genetic Information Processing	GO:0140101	molecular_function	catalytic activity, acting on a tRNA
OG0000635	alanine--tRNA ligase	K01872	AARS, alaS; alanyl-tRNA synthetase	[EC:6.1.1.7]	Aminoacyl-tRNA biosynthesis	Translation	Genetic Information Processing	GO:1901265	molecular_function	nucleoside phosphate binding
OG0000635	alanine--tRNA ligase	K01872	AARS, alaS; alanyl-tRNA synthetase	[EC:6.1.1.7]	Aminoacyl-tRNA biosynthesis	Translation	Genetic Information Processing	GO:0004812	molecular_function	aminoacyl-tRNA ligase activity
OG0000635	alanine--tRNA ligase	K01872	AARS, alaS; alanyl-tRNA synthetase	[EC:6.1.1.7]	Aminoacyl-tRNA biosynthesis	Translation	Genetic Information Processing	GO:0044237	biological_process	cellular metabolic process
OG0000635	alanine--tRNA ligase	K01872	AARS, alaS; alanyl-tRNA synthetase	[EC:6.1.1.7]	Aminoacyl-tRNA biosynthesis	Translation	Genetic Information Processing	GO:0004813	molecular_function	alanine-tRNA ligase activity
OG0000635	alanine--tRNA ligase	K01872	AARS, alaS; alanyl-tRNA synthetase	[EC:6.1.1.7]	Aminoacyl-tRNA biosynthesis	Translation	Genetic Information Processing	GO:0044238	biological_process	primary metabolic process
OG0000635	alanine--tRNA ligase	K01872	AARS, alaS; alanyl-tRNA synthetase	[EC:6.1.1.7]	Aminoacyl-tRNA biosynthesis	Translation	Genetic Information Processing	GO:0008270	molecular_function	zinc ion binding
OG0000635	alanine--tRNA ligase	K01872	AARS, alaS; alanyl-tRNA synthetase	[EC:6.1.1.7]	Aminoacyl-tRNA biosynthesis	Translation	Genetic Information Processing	GO:0034641	biological_process	cellular nitrogen compound metabolic process
OG0000635	alanine--tRNA ligase	K01872	AARS, alaS; alanyl-tRNA synthetase	[EC:6.1.1.7]	Aminoacyl-tRNA biosynthesis	Translation	Genetic Information Processing	GO:0019538	biological_process	protein metabolic process
OG0000635	alanine--tRNA ligase	K01872	AARS, alaS; alanyl-tRNA synthetase	[EC:6.1.1.7]	Aminoacyl-tRNA biosynthesis	Translation	Genetic Information Processing	GO:0043603	biological_process	cellular amide metabolic process
OG0000635	alanine--tRNA ligase	K01872	AARS, alaS; alanyl-tRNA synthetase	[EC:6.1.1.7]	Aminoacyl-tRNA biosynthesis	Translation	Genetic Information Processing	GO:0110165	cellular_component	cellular anatomical entity
OG0000635	alanine--tRNA ligase	K01872	AARS, alaS; alanyl-tRNA synthetase	[EC:6.1.1.7]	Aminoacyl-tRNA biosynthesis	Translation	Genetic Information Processing	GO:0043604	biological_process	amide biosynthetic process
OG0000635	alanine--tRNA ligase	K01872	AARS, alaS; alanyl-tRNA synthetase	[EC:6.1.1.7]	Aminoacyl-tRNA biosynthesis	Translation	Genetic Information Processing	GO:0034645	biological_process	cellular macromolecule biosynthetic process
OG0000635	alanine--tRNA ligase	K01872	AARS, alaS; alanyl-tRNA synthetase	[EC:6.1.1.7]	Aminoacyl-tRNA biosynthesis	Translation	Genetic Information Processing	GO:0008150	biological_process	biological_process
OG0000635	alanine--tRNA ligase	K01872	AARS, alaS; alanyl-tRNA synthetase	[EC:6.1.1.7]	Aminoacyl-tRNA biosynthesis	Translation	Genetic Information Processing	GO:0097367	molecular_function	carbohydrate derivative binding
OG0000635	alanine--tRNA ligase	K01872	AARS, alaS; alanyl-tRNA synthetase	[EC:6.1.1.7]	Aminoacyl-tRNA biosynthesis	Translation	Genetic Information Processing	GO:0008152	biological_process	metabolic process
OG0000635	alanine--tRNA ligase	K01872	AARS, alaS; alanyl-tRNA synthetase	[EC:6.1.1.7]	Aminoacyl-tRNA biosynthesis	Translation	Genetic Information Processing	GO:0044249	biological_process	cellular biosynthetic process
OG0000635	alanine--tRNA ligase	K01872	AARS, alaS; alanyl-tRNA synthetase	[EC:6.1.1.7]	Aminoacyl-tRNA biosynthesis	Translation	Genetic Information Processing	GO:0003674	molecular_function	molecular_function
OG0000635	alanine--tRNA ligase	K01872	AARS, alaS; alanyl-tRNA synthetase	[EC:6.1.1.7]	Aminoacyl-tRNA biosynthesis	Translation	Genetic Information Processing	GO:0030554	molecular_function	adenyl nucleotide binding
OG0000635	alanine--tRNA ligase	K01872	AARS, alaS; alanyl-tRNA synthetase	[EC:6.1.1.7]	Aminoacyl-tRNA biosynthesis	Translation	Genetic Information Processing	GO:0003676	molecular_function	nucleic acid binding
OG0000635	alanine--tRNA ligase	K01872	AARS, alaS; alanyl-tRNA synthetase	[EC:6.1.1.7]	Aminoacyl-tRNA biosynthesis	Translation	Genetic Information Processing	GO:1901564	biological_process	organonitrogen compound metabolic process
OG0000635	alanine--tRNA ligase	K01872	AARS, alaS; alanyl-tRNA synthetase	[EC:6.1.1.7]	Aminoacyl-tRNA biosynthesis	Translation	Genetic Information Processing	GO:0140640	molecular_function	catalytic activity, acting on a nucleic acid
OG0000635	alanine--tRNA ligase	K01872	AARS, alaS; alanyl-tRNA synthetase	[EC:6.1.1.7]	Aminoacyl-tRNA biosynthesis	Translation	Genetic Information Processing	GO:0009058	biological_process	biosynthetic process
OG0000635	alanine--tRNA ligase	K01872	AARS, alaS; alanyl-tRNA synthetase	[EC:6.1.1.7]	Aminoacyl-tRNA biosynthesis	Translation	Genetic Information Processing	GO:0010467	biological_process	gene expression
OG0000635	alanine--tRNA ligase	K01872	AARS, alaS; alanyl-tRNA synthetase	[EC:6.1.1.7]	Aminoacyl-tRNA biosynthesis	Translation	Genetic Information Processing	GO:0009059	biological_process	macromolecule biosynthetic process
OG0000635	alanine--tRNA ligase	K01872	AARS, alaS; alanyl-tRNA synthetase	[EC:6.1.1.7]	Aminoacyl-tRNA biosynthesis	Translation	Genetic Information Processing	GO:1901566	biological_process	organonitrogen compound biosynthetic process
OG0000635	alanine--tRNA ligase	K01872	AARS, alaS; alanyl-tRNA synthetase	[EC:6.1.1.7]	Aminoacyl-tRNA biosynthesis	Translation	Genetic Information Processing	GO:0044260	biological_process	cellular macromolecule metabolic process
OG0000635	alanine--tRNA ligase	K01872	AARS, alaS; alanyl-tRNA synthetase	[EC:6.1.1.7]	Aminoacyl-tRNA biosynthesis	Translation	Genetic Information Processing	GO:0034660	biological_process	ncRNA metabolic process
OG0000635	alanine--tRNA ligase	K01872	AARS, alaS; alanyl-tRNA synthetase	[EC:6.1.1.7]	Aminoacyl-tRNA biosynthesis	Translation	Genetic Information Processing	GO:0005737	cellular_component	cytoplasm
OG0000635	alanine--tRNA ligase	K01872	AARS, alaS; alanyl-tRNA synthetase	[EC:6.1.1.7]	Aminoacyl-tRNA biosynthesis	Translation	Genetic Information Processing	GO:0016874	molecular_function	ligase activity
OG0000635	alanine--tRNA ligase	K01872	AARS, alaS; alanyl-tRNA synthetase	[EC:6.1.1.7]	Aminoacyl-tRNA biosynthesis	Translation	Genetic Information Processing	GO:0016875	molecular_function	ligase activity, forming carbon-oxygen bonds
OG0000635	alanine--tRNA ligase	K01872	AARS, alaS; alanyl-tRNA synthetase	[EC:6.1.1.7]	Aminoacyl-tRNA biosynthesis	Translation	Genetic Information Processing	GO:0044271	biological_process	cellular nitrogen compound biosynthetic process
OG0000635	alanine--tRNA ligase	K01872	AARS, alaS; alanyl-tRNA synthetase	[EC:6.1.1.7]	Aminoacyl-tRNA biosynthesis	Translation	Genetic Information Processing	GO:0005488	molecular_function	binding
OG0000635	alanine--tRNA ligase	K01872	AARS, alaS; alanyl-tRNA synthetase	[EC:6.1.1.7]	Aminoacyl-tRNA biosynthesis	Translation	Genetic Information Processing	GO:0003824	molecular_function	catalytic activity
OG0000635	alanine--tRNA ligase	K01872	AARS, alaS; alanyl-tRNA synthetase	[EC:6.1.1.7]	Aminoacyl-tRNA biosynthesis	Translation	Genetic Information Processing	GO:0005622	cellular_component	intracellular anatomical structure
OG0000635	alanine--tRNA ligase	K01872	AARS, alaS; alanyl-tRNA synthetase	[EC:6.1.1.7]	Aminoacyl-tRNA biosynthesis	Translation	Genetic Information Processing	GO:0006518	biological_process	peptide metabolic process
OG0000635	alanine--tRNA ligase	K01872	AARS, alaS; alanyl-tRNA synthetase	[EC:6.1.1.7]	Aminoacyl-tRNA biosynthesis	Translation	Genetic Information Processing	GO:0006520	biological_process	cellular amino acid metabolic process
OG0000635	alanine--tRNA ligase	K01872	AARS, alaS; alanyl-tRNA synthetase	[EC:6.1.1.7]	Aminoacyl-tRNA biosynthesis	Translation	Genetic Information Processing	GO:0044281	biological_process	small molecule metabolic process
OG0000635	alanine--tRNA ligase	K01872	AARS, alaS; alanyl-tRNA synthetase	[EC:6.1.1.7]	Aminoacyl-tRNA biosynthesis	Translation	Genetic Information Processing	GO:0006139	biological_process	nucleobase-containing compound metabolic process
OG0000635	alanine--tRNA ligase	K01872	AARS, alaS; alanyl-tRNA synthetase	[EC:6.1.1.7]	Aminoacyl-tRNA biosynthesis	Translation	Genetic Information Processing	GO:0036094	molecular_function	small molecule binding
OG0000635	alanine--tRNA ligase	K01872	AARS, alaS; alanyl-tRNA synthetase	[EC:6.1.1.7]	Aminoacyl-tRNA biosynthesis	Translation	Genetic Information Processing	GO:0006399	biological_process	tRNA metabolic process
OG0000645	5-dehydro-2-deoxygluconokinase	K03338	iolC; 5-dehydro-2-deoxygluconokinase	[EC:2.7.1.92]	Inositol phosphate metabolism	Carbohydrate metabolism	Metabolism	GO:0009987	biological_process	cellular process
OG0000645	5-dehydro-2-deoxygluconokinase	K03338	iolC; 5-dehydro-2-deoxygluconokinase	[EC:2.7.1.92]	Inositol phosphate metabolism	Carbohydrate metabolism	Metabolism	GO:0016740	molecular_function	transferase activity
OG0000645	5-dehydro-2-deoxygluconokinase	K03338	iolC; 5-dehydro-2-deoxygluconokinase	[EC:2.7.1.92]	Inositol phosphate metabolism	Carbohydrate metabolism	Metabolism	GO:0016772	molecular_function	transferase activity, transferring phosphorus-containing groups
OG0000645	5-dehydro-2-deoxygluconokinase	K03338	iolC; 5-dehydro-2-deoxygluconokinase	[EC:2.7.1.92]	Inositol phosphate metabolism	Carbohydrate metabolism	Metabolism	GO:0016773	molecular_function	phosphotransferase activity, alcohol group as acceptor
OG0000645	5-dehydro-2-deoxygluconokinase	K03338	iolC; 5-dehydro-2-deoxygluconokinase	[EC:2.7.1.92]	Inositol phosphate metabolism	Carbohydrate metabolism	Metabolism	GO:0047590	molecular_function	5-dehydro-2-deoxygluconokinase activity
OG0000645	5-dehydro-2-deoxygluconokinase	K03338	iolC; 5-dehydro-2-deoxygluconokinase	[EC:2.7.1.92]	Inositol phosphate metabolism	Carbohydrate metabolism	Metabolism	GO:0006793	biological_process	phosphorus metabolic process
OG0000645	5-dehydro-2-deoxygluconokinase	K03338	iolC; 5-dehydro-2-deoxygluconokinase	[EC:2.7.1.92]	Inositol phosphate metabolism	Carbohydrate metabolism	Metabolism	GO:0006796	biological_process	phosphate-containing compound metabolic process
OG0000645	5-dehydro-2-deoxygluconokinase	K03338	iolC; 5-dehydro-2-deoxygluconokinase	[EC:2.7.1.92]	Inositol phosphate metabolism	Carbohydrate metabolism	Metabolism	GO:0016301	molecular_function	kinase activity
OG0000645	5-dehydro-2-deoxygluconokinase	K03338	iolC; 5-dehydro-2-deoxygluconokinase	[EC:2.7.1.92]	Inositol phosphate metabolism	Carbohydrate metabolism	Metabolism	GO:0044237	biological_process	cellular metabolic process
OG0000645	5-dehydro-2-deoxygluconokinase	K03338	iolC; 5-dehydro-2-deoxygluconokinase	[EC:2.7.1.92]	Inositol phosphate metabolism	Carbohydrate metabolism	Metabolism	GO:0003824	molecular_function	catalytic activity
OG0000645	5-dehydro-2-deoxygluconokinase	K03338	iolC; 5-dehydro-2-deoxygluconokinase	[EC:2.7.1.92]	Inositol phosphate metabolism	Carbohydrate metabolism	Metabolism	GO:0016310	biological_process	phosphorylation
OG0000645	5-dehydro-2-deoxygluconokinase	K03338	iolC; 5-dehydro-2-deoxygluconokinase	[EC:2.7.1.92]	Inositol phosphate metabolism	Carbohydrate metabolism	Metabolism	GO:0008150	biological_process	biological_process
OG0000645	5-dehydro-2-deoxygluconokinase	K03338	iolC; 5-dehydro-2-deoxygluconokinase	[EC:2.7.1.92]	Inositol phosphate metabolism	Carbohydrate metabolism	Metabolism	GO:0008152	biological_process	metabolic process
OG0000645	5-dehydro-2-deoxygluconokinase	K03338	iolC; 5-dehydro-2-deoxygluconokinase	[EC:2.7.1.92]	Inositol phosphate metabolism	Carbohydrate metabolism	Metabolism	GO:0003674	molecular_function	molecular_function
OG0000649	inositol 2-dehydrogenase	K00010	iolG; myo-inositol 2-dehydrogenase / D-chiro-inositol 1-dehydrogenase	[EC:1.1.1.18 1.1.1.369]	Inositol phosphate metabolism	Carbohydrate metabolism	Metabolism	GO:0050112	molecular_function	inositol 2-dehydrogenase activity
OG0000649	inositol 2-dehydrogenase	K00010	iolG; myo-inositol 2-dehydrogenase / D-chiro-inositol 1-dehydrogenase	[EC:1.1.1.18 1.1.1.369]	Inositol phosphate metabolism	Carbohydrate metabolism	Metabolism	GO:0016614	molecular_function	oxidoreductase activity, acting on CH-OH group of donors
OG0000649	inositol 2-dehydrogenase	K00010	iolG; myo-inositol 2-dehydrogenase / D-chiro-inositol 1-dehydrogenase	[EC:1.1.1.18 1.1.1.369]	Inositol phosphate metabolism	Carbohydrate metabolism	Metabolism	GO:0000166	molecular_function	nucleotide binding
OG0000649	inositol 2-dehydrogenase	K00010	iolG; myo-inositol 2-dehydrogenase / D-chiro-inositol 1-dehydrogenase	[EC:1.1.1.18 1.1.1.369]	Inositol phosphate metabolism	Carbohydrate metabolism	Metabolism	GO:0097159	molecular_function	organic cyclic compound binding
OG0000649	inositol 2-dehydrogenase	K00010	iolG; myo-inositol 2-dehydrogenase / D-chiro-inositol 1-dehydrogenase	[EC:1.1.1.18 1.1.1.369]	Inositol phosphate metabolism	Carbohydrate metabolism	Metabolism	GO:0016616	molecular_function	oxidoreductase activity, acting on the CH-OH group of donors, NAD or NADP as acceptor
OG0000649	inositol 2-dehydrogenase	K00010	iolG; myo-inositol 2-dehydrogenase / D-chiro-inositol 1-dehydrogenase	[EC:1.1.1.18 1.1.1.369]	Inositol phosphate metabolism	Carbohydrate metabolism	Metabolism	GO:0016491	molecular_function	oxidoreductase activity
OG0000649	inositol 2-dehydrogenase	K00010	iolG; myo-inositol 2-dehydrogenase / D-chiro-inositol 1-dehydrogenase	[EC:1.1.1.18 1.1.1.369]	Inositol phosphate metabolism	Carbohydrate metabolism	Metabolism	GO:1901265	molecular_function	nucleoside phosphate binding
OG0000649	inositol 2-dehydrogenase	K00010	iolG; myo-inositol 2-dehydrogenase / D-chiro-inositol 1-dehydrogenase	[EC:1.1.1.18 1.1.1.369]	Inositol phosphate metabolism	Carbohydrate metabolism	Metabolism	GO:1901363	molecular_function	heterocyclic compound binding
OG0000649	inositol 2-dehydrogenase	K00010	iolG; myo-inositol 2-dehydrogenase / D-chiro-inositol 1-dehydrogenase	[EC:1.1.1.18 1.1.1.369]	Inositol phosphate metabolism	Carbohydrate metabolism	Metabolism	GO:0003824	molecular_function	catalytic activity
OG0000649	inositol 2-dehydrogenase	K00010	iolG; myo-inositol 2-dehydrogenase / D-chiro-inositol 1-dehydrogenase	[EC:1.1.1.18 1.1.1.369]	Inositol phosphate metabolism	Carbohydrate metabolism	Metabolism	GO:0005488	molecular_function	binding
OG0000649	inositol 2-dehydrogenase	K00010	iolG; myo-inositol 2-dehydrogenase / D-chiro-inositol 1-dehydrogenase	[EC:1.1.1.18 1.1.1.369]	Inositol phosphate metabolism	Carbohydrate metabolism	Metabolism	GO:0004022	molecular_function	alcohol dehydrogenase (NAD+) activity
OG0000649	inositol 2-dehydrogenase	K00010	iolG; myo-inositol 2-dehydrogenase / D-chiro-inositol 1-dehydrogenase	[EC:1.1.1.18 1.1.1.369]	Inositol phosphate metabolism	Carbohydrate metabolism	Metabolism	GO:0018455	molecular_function	alcohol dehydrogenase [NAD(P)+] activity
OG0000649	inositol 2-dehydrogenase	K00010	iolG; myo-inositol 2-dehydrogenase / D-chiro-inositol 1-dehydrogenase	[EC:1.1.1.18 1.1.1.369]	Inositol phosphate metabolism	Carbohydrate metabolism	Metabolism	GO:0003674	molecular_function	molecular_function
OG0000649	inositol 2-dehydrogenase	K00010	iolG; myo-inositol 2-dehydrogenase / D-chiro-inositol 1-dehydrogenase	[EC:1.1.1.18 1.1.1.369]	Inositol phosphate metabolism	Carbohydrate metabolism	Metabolism	GO:0036094	molecular_function	small molecule binding
OG0000649	inositol 2-dehydrogenase	K00010	iolG; myo-inositol 2-dehydrogenase / D-chiro-inositol 1-dehydrogenase	[EC:1.1.1.18 1.1.1.369]	Streptomycin biosynthesis	Biosynthesis of other secondary metabolites	Metabolism	GO:0050112	molecular_function	inositol 2-dehydrogenase activity
OG0000649	inositol 2-dehydrogenase	K00010	iolG; myo-inositol 2-dehydrogenase / D-chiro-inositol 1-dehydrogenase	[EC:1.1.1.18 1.1.1.369]	Streptomycin biosynthesis	Biosynthesis of other secondary metabolites	Metabolism	GO:0016614	molecular_function	oxidoreductase activity, acting on CH-OH group of donors
OG0000649	inositol 2-dehydrogenase	K00010	iolG; myo-inositol 2-dehydrogenase / D-chiro-inositol 1-dehydrogenase	[EC:1.1.1.18 1.1.1.369]	Streptomycin biosynthesis	Biosynthesis of other secondary metabolites	Metabolism	GO:0000166	molecular_function	nucleotide binding
OG0000649	inositol 2-dehydrogenase	K00010	iolG; myo-inositol 2-dehydrogenase / D-chiro-inositol 1-dehydrogenase	[EC:1.1.1.18 1.1.1.369]	Streptomycin biosynthesis	Biosynthesis of other secondary metabolites	Metabolism	GO:0097159	molecular_function	organic cyclic compound binding
OG0000649	inositol 2-dehydrogenase	K00010	iolG; myo-inositol 2-dehydrogenase / D-chiro-inositol 1-dehydrogenase	[EC:1.1.1.18 1.1.1.369]	Streptomycin biosynthesis	Biosynthesis of other secondary metabolites	Metabolism	GO:0016616	molecular_function	oxidoreductase activity, acting on the CH-OH group of donors, NAD or NADP as acceptor
OG0000649	inositol 2-dehydrogenase	K00010	iolG; myo-inositol 2-dehydrogenase / D-chiro-inositol 1-dehydrogenase	[EC:1.1.1.18 1.1.1.369]	Streptomycin biosynthesis	Biosynthesis of other secondary metabolites	Metabolism	GO:0016491	molecular_function	oxidoreductase activity
OG0000649	inositol 2-dehydrogenase	K00010	iolG; myo-inositol 2-dehydrogenase / D-chiro-inositol 1-dehydrogenase	[EC:1.1.1.18 1.1.1.369]	Streptomycin biosynthesis	Biosynthesis of other secondary metabolites	Metabolism	GO:1901265	molecular_function	nucleoside phosphate binding
OG0000649	inositol 2-dehydrogenase	K00010	iolG; myo-inositol 2-dehydrogenase / D-chiro-inositol 1-dehydrogenase	[EC:1.1.1.18 1.1.1.369]	Streptomycin biosynthesis	Biosynthesis of other secondary metabolites	Metabolism	GO:1901363	molecular_function	heterocyclic compound binding
OG0000649	inositol 2-dehydrogenase	K00010	iolG; myo-inositol 2-dehydrogenase / D-chiro-inositol 1-dehydrogenase	[EC:1.1.1.18 1.1.1.369]	Streptomycin biosynthesis	Biosynthesis of other secondary metabolites	Metabolism	GO:0003824	molecular_function	catalytic activity
OG0000649	inositol 2-dehydrogenase	K00010	iolG; myo-inositol 2-dehydrogenase / D-chiro-inositol 1-dehydrogenase	[EC:1.1.1.18 1.1.1.369]	Streptomycin biosynthesis	Biosynthesis of other secondary metabolites	Metabolism	GO:0005488	molecular_function	binding
OG0000649	inositol 2-dehydrogenase	K00010	iolG; myo-inositol 2-dehydrogenase / D-chiro-inositol 1-dehydrogenase	[EC:1.1.1.18 1.1.1.369]	Streptomycin biosynthesis	Biosynthesis of other secondary metabolites	Metabolism	GO:0004022	molecular_function	alcohol dehydrogenase (NAD+) activity
OG0000649	inositol 2-dehydrogenase	K00010	iolG; myo-inositol 2-dehydrogenase / D-chiro-inositol 1-dehydrogenase	[EC:1.1.1.18 1.1.1.369]	Streptomycin biosynthesis	Biosynthesis of other secondary metabolites	Metabolism	GO:0018455	molecular_function	alcohol dehydrogenase [NAD(P)+] activity
OG0000649	inositol 2-dehydrogenase	K00010	iolG; myo-inositol 2-dehydrogenase / D-chiro-inositol 1-dehydrogenase	[EC:1.1.1.18 1.1.1.369]	Streptomycin biosynthesis	Biosynthesis of other secondary metabolites	Metabolism	GO:0003674	molecular_function	molecular_function
OG0000649	inositol 2-dehydrogenase	K00010	iolG; myo-inositol 2-dehydrogenase / D-chiro-inositol 1-dehydrogenase	[EC:1.1.1.18 1.1.1.369]	Streptomycin biosynthesis	Biosynthesis of other secondary metabolites	Metabolism	GO:0036094	molecular_function	small molecule binding
OG0000667	electron transfer flavoprotein-ubiquinone oxidoreductase							GO:0043169	molecular_function	cation binding
OG0000667	electron transfer flavoprotein-ubiquinone oxidoreductase							GO:0009987	biological_process	cellular process
OG0000667	electron transfer flavoprotein-ubiquinone oxidoreductase							GO:0016645	molecular_function	oxidoreductase activity, acting on the CH-NH group of donors
OG0000667	electron transfer flavoprotein-ubiquinone oxidoreductase							GO:0016649	molecular_function	oxidoreductase activity, acting on the CH-NH group of donors, quinone or similar compound as acceptor
OG0000667	electron transfer flavoprotein-ubiquinone oxidoreductase							GO:0006091	biological_process	generation of precursor metabolites and energy
OG0000667	electron transfer flavoprotein-ubiquinone oxidoreductase							GO:0016491	molecular_function	oxidoreductase activity
OG0000667	electron transfer flavoprotein-ubiquinone oxidoreductase							GO:0015980	biological_process	energy derivation by oxidation of organic compounds
OG0000667	electron transfer flavoprotein-ubiquinone oxidoreductase							GO:0044237	biological_process	cellular metabolic process
OG0000667	electron transfer flavoprotein-ubiquinone oxidoreductase							GO:0004174	molecular_function	electron-transferring-flavoprotein dehydrogenase activity
OG0000667	electron transfer flavoprotein-ubiquinone oxidoreductase							GO:0051536	molecular_function	iron-sulfur cluster binding
OG0000667	electron transfer flavoprotein-ubiquinone oxidoreductase							GO:0005488	molecular_function	binding
OG0000667	electron transfer flavoprotein-ubiquinone oxidoreductase							GO:0003824	molecular_function	catalytic activity
OG0000667	electron transfer flavoprotein-ubiquinone oxidoreductase							GO:0051539	molecular_function	4 iron, 4 sulfur cluster binding
OG0000667	electron transfer flavoprotein-ubiquinone oxidoreductase							GO:0051540	molecular_function	metal cluster binding
OG0000667	electron transfer flavoprotein-ubiquinone oxidoreductase							GO:0022900	biological_process	electron transport chain
OG0000667	electron transfer flavoprotein-ubiquinone oxidoreductase							GO:0045333	biological_process	cellular respiration
OG0000667	electron transfer flavoprotein-ubiquinone oxidoreductase							GO:0008150	biological_process	biological_process
OG0000667	electron transfer flavoprotein-ubiquinone oxidoreductase							GO:0008152	biological_process	metabolic process
OG0000667	electron transfer flavoprotein-ubiquinone oxidoreductase							GO:0046872	molecular_function	metal ion binding
OG0000667	electron transfer flavoprotein-ubiquinone oxidoreductase							GO:0022904	biological_process	respiratory electron transport chain
OG0000667	electron transfer flavoprotein-ubiquinone oxidoreductase							GO:0003674	molecular_function	molecular_function
OG0000667	electron transfer flavoprotein-ubiquinone oxidoreductase							GO:0043167	molecular_function	ion binding
OG0000667	electron transfer flavoprotein-ubiquinone oxidoreductase							GO:0009055	molecular_function	electron transfer activity
OG0000761	ATP-binding protein	K03405	chlI, bchI; magnesium chelatase subunit I	[EC:6.6.1.1]	Porphyrin metabolism	Metabolism of cofactors and vitamins	Metabolism	GO:0097159	molecular_function	organic cyclic compound binding
OG0000761	ATP-binding protein	K03405	chlI, bchI; magnesium chelatase subunit I	[EC:6.6.1.1]	Porphyrin metabolism	Metabolism of cofactors and vitamins	Metabolism	GO:1901265	molecular_function	nucleoside phosphate binding
OG0000761	ATP-binding protein	K03405	chlI, bchI; magnesium chelatase subunit I	[EC:6.6.1.1]	Porphyrin metabolism	Metabolism of cofactors and vitamins	Metabolism	GO:0016462	molecular_function	pyrophosphatase activity
OG0000761	ATP-binding protein	K03405	chlI, bchI; magnesium chelatase subunit I	[EC:6.6.1.1]	Porphyrin metabolism	Metabolism of cofactors and vitamins	Metabolism	GO:0016787	molecular_function	hydrolase activity
OG0000761	ATP-binding protein	K03405	chlI, bchI; magnesium chelatase subunit I	[EC:6.6.1.1]	Porphyrin metabolism	Metabolism of cofactors and vitamins	Metabolism	GO:0005524	molecular_function	ATP binding
OG0000761	ATP-binding protein	K03405	chlI, bchI; magnesium chelatase subunit I	[EC:6.6.1.1]	Porphyrin metabolism	Metabolism of cofactors and vitamins	Metabolism	GO:0097367	molecular_function	carbohydrate derivative binding
OG0000761	ATP-binding protein	K03405	chlI, bchI; magnesium chelatase subunit I	[EC:6.6.1.1]	Porphyrin metabolism	Metabolism of cofactors and vitamins	Metabolism	GO:0017111	molecular_function	ribonucleoside triphosphate phosphatase activity
OG0000761	ATP-binding protein	K03405	chlI, bchI; magnesium chelatase subunit I	[EC:6.6.1.1]	Porphyrin metabolism	Metabolism of cofactors and vitamins	Metabolism	GO:0003674	molecular_function	molecular_function
OG0000761	ATP-binding protein	K03405	chlI, bchI; magnesium chelatase subunit I	[EC:6.6.1.1]	Porphyrin metabolism	Metabolism of cofactors and vitamins	Metabolism	GO:0030554	molecular_function	adenyl nucleotide binding
OG0000761	ATP-binding protein	K03405	chlI, bchI; magnesium chelatase subunit I	[EC:6.6.1.1]	Porphyrin metabolism	Metabolism of cofactors and vitamins	Metabolism	GO:0043167	molecular_function	ion binding
OG0000761	ATP-binding protein	K03405	chlI, bchI; magnesium chelatase subunit I	[EC:6.6.1.1]	Porphyrin metabolism	Metabolism of cofactors and vitamins	Metabolism	GO:0043168	molecular_function	anion binding
OG0000761	ATP-binding protein	K03405	chlI, bchI; magnesium chelatase subunit I	[EC:6.6.1.1]	Porphyrin metabolism	Metabolism of cofactors and vitamins	Metabolism	GO:0000166	molecular_function	nucleotide binding
OG0000761	ATP-binding protein	K03405	chlI, bchI; magnesium chelatase subunit I	[EC:6.6.1.1]	Porphyrin metabolism	Metabolism of cofactors and vitamins	Metabolism	GO:0032553	molecular_function	ribonucleotide binding
OG0000761	ATP-binding protein	K03405	chlI, bchI; magnesium chelatase subunit I	[EC:6.6.1.1]	Porphyrin metabolism	Metabolism of cofactors and vitamins	Metabolism	GO:0016874	molecular_function	ligase activity
OG0000761	ATP-binding protein	K03405	chlI, bchI; magnesium chelatase subunit I	[EC:6.6.1.1]	Porphyrin metabolism	Metabolism of cofactors and vitamins	Metabolism	GO:0032555	molecular_function	purine ribonucleotide binding
OG0000761	ATP-binding protein	K03405	chlI, bchI; magnesium chelatase subunit I	[EC:6.6.1.1]	Porphyrin metabolism	Metabolism of cofactors and vitamins	Metabolism	GO:1901363	molecular_function	heterocyclic compound binding
OG0000761	ATP-binding protein	K03405	chlI, bchI; magnesium chelatase subunit I	[EC:6.6.1.1]	Porphyrin metabolism	Metabolism of cofactors and vitamins	Metabolism	GO:0032559	molecular_function	adenyl ribonucleotide binding
OG0000761	ATP-binding protein	K03405	chlI, bchI; magnesium chelatase subunit I	[EC:6.6.1.1]	Porphyrin metabolism	Metabolism of cofactors and vitamins	Metabolism	GO:0005488	molecular_function	binding
OG0000761	ATP-binding protein	K03405	chlI, bchI; magnesium chelatase subunit I	[EC:6.6.1.1]	Porphyrin metabolism	Metabolism of cofactors and vitamins	Metabolism	GO:0003824	molecular_function	catalytic activity
OG0000761	ATP-binding protein	K03405	chlI, bchI; magnesium chelatase subunit I	[EC:6.6.1.1]	Porphyrin metabolism	Metabolism of cofactors and vitamins	Metabolism	GO:0016817	molecular_function	hydrolase activity, acting on acid anhydrides
OG0000761	ATP-binding protein	K03405	chlI, bchI; magnesium chelatase subunit I	[EC:6.6.1.1]	Porphyrin metabolism	Metabolism of cofactors and vitamins	Metabolism	GO:0016818	molecular_function	hydrolase activity, acting on acid anhydrides, in phosphorus-containing anhydrides
OG0000761	ATP-binding protein	K03405	chlI, bchI; magnesium chelatase subunit I	[EC:6.6.1.1]	Porphyrin metabolism	Metabolism of cofactors and vitamins	Metabolism	GO:0140657	molecular_function	ATP-dependent activity
OG0000761	ATP-binding protein	K03405	chlI, bchI; magnesium chelatase subunit I	[EC:6.6.1.1]	Porphyrin metabolism	Metabolism of cofactors and vitamins	Metabolism	GO:0017076	molecular_function	purine nucleotide binding
OG0000761	ATP-binding protein	K03405	chlI, bchI; magnesium chelatase subunit I	[EC:6.6.1.1]	Porphyrin metabolism	Metabolism of cofactors and vitamins	Metabolism	GO:0035639	molecular_function	purine ribonucleoside triphosphate binding
OG0000761	ATP-binding protein	K03405	chlI, bchI; magnesium chelatase subunit I	[EC:6.6.1.1]	Porphyrin metabolism	Metabolism of cofactors and vitamins	Metabolism	GO:0016887	molecular_function	ATP hydrolysis activity
OG0000761	ATP-binding protein	K03405	chlI, bchI; magnesium chelatase subunit I	[EC:6.6.1.1]	Porphyrin metabolism	Metabolism of cofactors and vitamins	Metabolism	GO:0036094	molecular_function	small molecule binding
OG0000801	aldo/keto reductase							GO:0003824	molecular_function	catalytic activity
OG0000801	aldo/keto reductase							GO:0016614	molecular_function	oxidoreductase activity, acting on CH-OH group of donors
OG0000801	aldo/keto reductase							GO:0016616	molecular_function	oxidoreductase activity, acting on the CH-OH group of donors, NAD or NADP as acceptor
OG0000801	aldo/keto reductase							GO:0047834	molecular_function	D-threo-aldose 1-dehydrogenase activity
OG0000801	aldo/keto reductase							GO:0003674	molecular_function	molecular_function
OG0000801	aldo/keto reductase							GO:0016491	molecular_function	oxidoreductase activity
OG0000831	Spy/CpxP family protein refolding chaperone							GO:0110165	cellular_component	cellular anatomical entity
OG0000831	Spy/CpxP family protein refolding chaperone							GO:0042597	cellular_component	periplasmic space
OG0000831	Spy/CpxP family protein refolding chaperone							GO:0005575	cellular_component	cellular_component
OG0000836	MFS transporter							GO:0051234	biological_process	establishment of localization
OG0000836	MFS transporter							GO:0009987	biological_process	cellular process
OG0000836	MFS transporter							GO:0005575	cellular_component	cellular_component
OG0000836	MFS transporter							GO:0022857	molecular_function	transmembrane transporter activity
OG0000836	MFS transporter							GO:0051179	biological_process	localization
OG0000836	MFS transporter							GO:0055085	biological_process	transmembrane transport
OG0000836	MFS transporter							GO:0016020	cellular_component	membrane
OG0000836	MFS transporter							GO:0110165	cellular_component	cellular anatomical entity
OG0000836	MFS transporter							GO:0016021	cellular_component	integral component of membrane
OG0000836	MFS transporter							GO:0008150	biological_process	biological_process
OG0000836	MFS transporter							GO:0031224	cellular_component	intrinsic component of membrane
OG0000836	MFS transporter							GO:0003674	molecular_function	molecular_function
OG0000836	MFS transporter							GO:0006810	biological_process	transport
OG0000836	MFS transporter							GO:0005215	molecular_function	transporter activity
OG0000868	hypothetical protein
OG0000894	23S rRNA (uracil(1939)-C(5))-methyltransferase RlmD							GO:0005506	molecular_function	iron ion binding
OG0000894	23S rRNA (uracil(1939)-C(5))-methyltransferase RlmD							GO:0032259	biological_process	methylation
OG0000894	23S rRNA (uracil(1939)-C(5))-methyltransferase RlmD							GO:0009987	biological_process	cellular process
OG0000894	23S rRNA (uracil(1939)-C(5))-methyltransferase RlmD							GO:0097159	molecular_function	organic cyclic compound binding
OG0000894	23S rRNA (uracil(1939)-C(5))-methyltransferase RlmD							GO:0003723	molecular_function	RNA binding
OG0000894	23S rRNA (uracil(1939)-C(5))-methyltransferase RlmD							GO:0042254	biological_process	ribosome biogenesis
OG0000894	23S rRNA (uracil(1939)-C(5))-methyltransferase RlmD							GO:0046483	biological_process	heterocycle metabolic process
OG0000894	23S rRNA (uracil(1939)-C(5))-methyltransferase RlmD							GO:0043412	biological_process	macromolecule modification
OG0000894	23S rRNA (uracil(1939)-C(5))-methyltransferase RlmD							GO:0043414	biological_process	macromolecule methylation
OG0000894	23S rRNA (uracil(1939)-C(5))-methyltransferase RlmD							GO:0006807	biological_process	nitrogen compound metabolic process
OG0000894	23S rRNA (uracil(1939)-C(5))-methyltransferase RlmD							GO:0046872	molecular_function	metal ion binding
OG0000894	23S rRNA (uracil(1939)-C(5))-methyltransferase RlmD							GO:0070041	molecular_function	rRNA (uridine-C5-)-methyltransferase activity
OG0000894	23S rRNA (uracil(1939)-C(5))-methyltransferase RlmD							GO:0071704	biological_process	organic substance metabolic process
OG0000894	23S rRNA (uracil(1939)-C(5))-methyltransferase RlmD							GO:0000154	biological_process	rRNA modification
OG0000894	23S rRNA (uracil(1939)-C(5))-methyltransferase RlmD							GO:0043167	molecular_function	ion binding
OG0000894	23S rRNA (uracil(1939)-C(5))-methyltransferase RlmD							GO:0043169	molecular_function	cation binding
OG0000894	23S rRNA (uracil(1939)-C(5))-methyltransferase RlmD							GO:0071840	biological_process	cellular component organization or biogenesis
OG0000894	23S rRNA (uracil(1939)-C(5))-methyltransferase RlmD							GO:0043170	biological_process	macromolecule metabolic process
OG0000894	23S rRNA (uracil(1939)-C(5))-methyltransferase RlmD							GO:0034470	biological_process	ncRNA processing
OG0000894	23S rRNA (uracil(1939)-C(5))-methyltransferase RlmD							GO:1901360	biological_process	organic cyclic compound metabolic process
OG0000894	23S rRNA (uracil(1939)-C(5))-methyltransferase RlmD							GO:1901363	molecular_function	heterocyclic compound binding
OG0000894	23S rRNA (uracil(1939)-C(5))-methyltransferase RlmD							GO:0016436	molecular_function	rRNA (uridine) methyltransferase activity
OG0000894	23S rRNA (uracil(1939)-C(5))-methyltransferase RlmD							GO:0008757	molecular_function	S-adenosylmethionine-dependent methyltransferase activity
OG0000894	23S rRNA (uracil(1939)-C(5))-methyltransferase RlmD							GO:0044085	biological_process	cellular component biogenesis
OG0000894	23S rRNA (uracil(1939)-C(5))-methyltransferase RlmD							GO:0031167	biological_process	rRNA methylation
OG0000894	23S rRNA (uracil(1939)-C(5))-methyltransferase RlmD							GO:0140098	molecular_function	catalytic activity, acting on RNA
OG0000894	23S rRNA (uracil(1939)-C(5))-methyltransferase RlmD							GO:0090304	biological_process	nucleic acid metabolic process
OG0000894	23S rRNA (uracil(1939)-C(5))-methyltransferase RlmD							GO:0046914	molecular_function	transition metal ion binding
OG0000894	23S rRNA (uracil(1939)-C(5))-methyltransferase RlmD							GO:0140102	molecular_function	catalytic activity, acting on a rRNA
OG0000894	23S rRNA (uracil(1939)-C(5))-methyltransferase RlmD							GO:0006725	biological_process	cellular aromatic compound metabolic process
OG0000894	23S rRNA (uracil(1939)-C(5))-methyltransferase RlmD							GO:0016070	biological_process	RNA metabolic process
OG0000894	23S rRNA (uracil(1939)-C(5))-methyltransferase RlmD							GO:0016072	biological_process	rRNA metabolic process
OG0000894	23S rRNA (uracil(1939)-C(5))-methyltransferase RlmD							GO:0008649	molecular_function	rRNA methyltransferase activity
OG0000894	23S rRNA (uracil(1939)-C(5))-methyltransferase RlmD							GO:0044237	biological_process	cellular metabolic process
OG0000894	23S rRNA (uracil(1939)-C(5))-methyltransferase RlmD							GO:0044238	biological_process	primary metabolic process
OG0000894	23S rRNA (uracil(1939)-C(5))-methyltransferase RlmD							GO:0051536	molecular_function	iron-sulfur cluster binding
OG0000894	23S rRNA (uracil(1939)-C(5))-methyltransferase RlmD							GO:0034641	biological_process	cellular nitrogen compound metabolic process
OG0000894	23S rRNA (uracil(1939)-C(5))-methyltransferase RlmD							GO:0051539	molecular_function	4 iron, 4 sulfur cluster binding
OG0000894	23S rRNA (uracil(1939)-C(5))-methyltransferase RlmD							GO:0051540	molecular_function	metal cluster binding
OG0000894	23S rRNA (uracil(1939)-C(5))-methyltransferase RlmD							GO:0022613	biological_process	ribonucleoprotein complex biogenesis
OG0000894	23S rRNA (uracil(1939)-C(5))-methyltransferase RlmD							GO:0008150	biological_process	biological_process
OG0000894	23S rRNA (uracil(1939)-C(5))-methyltransferase RlmD							GO:0008152	biological_process	metabolic process
OG0000894	23S rRNA (uracil(1939)-C(5))-methyltransferase RlmD							GO:0003674	molecular_function	molecular_function
OG0000894	23S rRNA (uracil(1939)-C(5))-methyltransferase RlmD							GO:0003676	molecular_function	nucleic acid binding
OG0000894	23S rRNA (uracil(1939)-C(5))-methyltransferase RlmD							GO:0006364	biological_process	rRNA processing
OG0000894	23S rRNA (uracil(1939)-C(5))-methyltransferase RlmD							GO:0140640	molecular_function	catalytic activity, acting on a nucleic acid
OG0000894	23S rRNA (uracil(1939)-C(5))-methyltransferase RlmD							GO:0010467	biological_process	gene expression
OG0000894	23S rRNA (uracil(1939)-C(5))-methyltransferase RlmD							GO:0016740	molecular_function	transferase activity
OG0000894	23S rRNA (uracil(1939)-C(5))-methyltransferase RlmD							GO:0034660	biological_process	ncRNA metabolic process
OG0000894	23S rRNA (uracil(1939)-C(5))-methyltransferase RlmD							GO:0044260	biological_process	cellular macromolecule metabolic process
OG0000894	23S rRNA (uracil(1939)-C(5))-methyltransferase RlmD							GO:0016741	molecular_function	transferase activity, transferring one-carbon groups
OG0000894	23S rRNA (uracil(1939)-C(5))-methyltransferase RlmD							GO:0001510	biological_process	RNA methylation
OG0000894	23S rRNA (uracil(1939)-C(5))-methyltransferase RlmD							GO:0008168	molecular_function	methyltransferase activity
OG0000894	23S rRNA (uracil(1939)-C(5))-methyltransferase RlmD							GO:0008169	molecular_function	C-methyltransferase activity
OG0000894	23S rRNA (uracil(1939)-C(5))-methyltransferase RlmD							GO:0009451	biological_process	RNA modification
OG0000894	23S rRNA (uracil(1939)-C(5))-methyltransferase RlmD							GO:0008173	molecular_function	RNA methyltransferase activity
OG0000894	23S rRNA (uracil(1939)-C(5))-methyltransferase RlmD							GO:0005488	molecular_function	binding
OG0000894	23S rRNA (uracil(1939)-C(5))-methyltransferase RlmD							GO:0003824	molecular_function	catalytic activity
OG0000894	23S rRNA (uracil(1939)-C(5))-methyltransferase RlmD							GO:0006139	biological_process	nucleobase-containing compound metabolic process
OG0000894	23S rRNA (uracil(1939)-C(5))-methyltransferase RlmD							GO:0006396	biological_process	RNA processing
OG0000932	LysR family transcriptional regulator							GO:0090304	biological_process	nucleic acid metabolic process
OG0000932	LysR family transcriptional regulator							GO:0009987	biological_process	cellular process
OG0000932	LysR family transcriptional regulator							GO:0006725	biological_process	cellular aromatic compound metabolic process
OG0000932	LysR family transcriptional regulator							GO:0032774	biological_process	RNA biosynthetic process
OG0000932	LysR family transcriptional regulator							GO:0016070	biological_process	RNA metabolic process
OG0000932	LysR family transcriptional regulator							GO:0140110	molecular_function	transcription regulator activity
OG0000932	LysR family transcriptional regulator							GO:0044237	biological_process	cellular metabolic process
OG0000932	LysR family transcriptional regulator							GO:0044238	biological_process	primary metabolic process
OG0000932	LysR family transcriptional regulator							GO:0006351	biological_process	DNA-templated transcription
OG0000932	LysR family transcriptional regulator							GO:1903506	biological_process	regulation of nucleic acid-templated transcription
OG0000932	LysR family transcriptional regulator							GO:0034641	biological_process	cellular nitrogen compound metabolic process
OG0000932	LysR family transcriptional regulator							GO:0018130	biological_process	heterocycle biosynthetic process
OG0000932	LysR family transcriptional regulator							GO:0006355	biological_process	regulation of DNA-templated transcription
OG0000932	LysR family transcriptional regulator							GO:0046483	biological_process	heterocycle metabolic process
OG0000932	LysR family transcriptional regulator							GO:0019219	biological_process	regulation of nucleobase-containing compound metabolic process
OG0000932	LysR family transcriptional regulator							GO:1901576	biological_process	organic substance biosynthetic process
OG0000932	LysR family transcriptional regulator							GO:0008150	biological_process	biological_process
OG0000932	LysR family transcriptional regulator							GO:0019222	biological_process	regulation of metabolic process
OG0000932	LysR family transcriptional regulator							GO:0006807	biological_process	nitrogen compound metabolic process
OG0000932	LysR family transcriptional regulator							GO:0008152	biological_process	metabolic process
OG0000932	LysR family transcriptional regulator							GO:0071704	biological_process	organic substance metabolic process
OG0000932	LysR family transcriptional regulator							GO:0044249	biological_process	cellular biosynthetic process
OG0000932	LysR family transcriptional regulator							GO:0003674	molecular_function	molecular_function
OG0000932	LysR family transcriptional regulator							GO:0031323	biological_process	regulation of cellular metabolic process
OG0000932	LysR family transcriptional regulator							GO:0080090	biological_process	regulation of primary metabolic process
OG0000932	LysR family transcriptional regulator							GO:0034654	biological_process	nucleobase-containing compound biosynthetic process
OG0000932	LysR family transcriptional regulator							GO:0031326	biological_process	regulation of cellular biosynthetic process
OG0000932	LysR family transcriptional regulator							GO:0060255	biological_process	regulation of macromolecule metabolic process
OG0000932	LysR family transcriptional regulator							GO:0009889	biological_process	regulation of biosynthetic process
OG0000932	LysR family transcriptional regulator							GO:0043170	biological_process	macromolecule metabolic process
OG0000932	LysR family transcriptional regulator							GO:0009058	biological_process	biosynthetic process
OG0000932	LysR family transcriptional regulator							GO:0010467	biological_process	gene expression
OG0000932	LysR family transcriptional regulator							GO:0009059	biological_process	macromolecule biosynthetic process
OG0000932	LysR family transcriptional regulator							GO:0051171	biological_process	regulation of nitrogen compound metabolic process
OG0000932	LysR family transcriptional regulator							GO:0010468	biological_process	regulation of gene expression
OG0000932	LysR family transcriptional regulator							GO:0050789	biological_process	regulation of biological process
OG0000932	LysR family transcriptional regulator							GO:0050794	biological_process	regulation of cellular process
OG0000932	LysR family transcriptional regulator							GO:2001141	biological_process	regulation of RNA biosynthetic process
OG0000932	LysR family transcriptional regulator							GO:1901360	biological_process	organic cyclic compound metabolic process
OG0000932	LysR family transcriptional regulator							GO:0019438	biological_process	aromatic compound biosynthetic process
OG0000932	LysR family transcriptional regulator							GO:0044271	biological_process	cellular nitrogen compound biosynthetic process
OG0000932	LysR family transcriptional regulator							GO:1901362	biological_process	organic cyclic compound biosynthetic process
OG0000932	LysR family transcriptional regulator							GO:0065007	biological_process	biological regulation
OG0000932	LysR family transcriptional regulator							GO:0051252	biological_process	regulation of RNA metabolic process
OG0000932	LysR family transcriptional regulator							GO:0003700	molecular_function	DNA-binding transcription factor activity
OG0000932	LysR family transcriptional regulator							GO:0097659	biological_process	nucleic acid-templated transcription
OG0000932	LysR family transcriptional regulator							GO:0006139	biological_process	nucleobase-containing compound metabolic process
OG0000932	LysR family transcriptional regulator							GO:0010556	biological_process	regulation of macromolecule biosynthetic process
OG0000964	endopeptidase La	K01338	lon; ATP-dependent Lon protease	[EC:3.4.21.53]	Cell cycle - Caulobacter	Cell growth and death	Cellular Processes	GO:0009987	biological_process	cellular process
OG0000964	endopeptidase La	K01338	lon; ATP-dependent Lon protease	[EC:3.4.21.53]	Cell cycle - Caulobacter	Cell growth and death	Cellular Processes	GO:0051716	biological_process	cellular response to stimulus
OG0000964	endopeptidase La	K01338	lon; ATP-dependent Lon protease	[EC:3.4.21.53]	Cell cycle - Caulobacter	Cell growth and death	Cellular Processes	GO:0097159	molecular_function	organic cyclic compound binding
OG0000964	endopeptidase La	K01338	lon; ATP-dependent Lon protease	[EC:3.4.21.53]	Cell cycle - Caulobacter	Cell growth and death	Cellular Processes	GO:0033554	biological_process	cellular response to stress
OG0000964	endopeptidase La	K01338	lon; ATP-dependent Lon protease	[EC:3.4.21.53]	Cell cycle - Caulobacter	Cell growth and death	Cellular Processes	GO:0016787	molecular_function	hydrolase activity
OG0000964	endopeptidase La	K01338	lon; ATP-dependent Lon protease	[EC:3.4.21.53]	Cell cycle - Caulobacter	Cell growth and death	Cellular Processes	GO:0017171	molecular_function	serine hydrolase activity
OG0000964	endopeptidase La	K01338	lon; ATP-dependent Lon protease	[EC:3.4.21.53]	Cell cycle - Caulobacter	Cell growth and death	Cellular Processes	GO:0051603	biological_process	proteolysis involved in protein catabolic process
OG0000964	endopeptidase La	K01338	lon; ATP-dependent Lon protease	[EC:3.4.21.53]	Cell cycle - Caulobacter	Cell growth and death	Cellular Processes	GO:0005524	molecular_function	ATP binding
OG0000964	endopeptidase La	K01338	lon; ATP-dependent Lon protease	[EC:3.4.21.53]	Cell cycle - Caulobacter	Cell growth and death	Cellular Processes	GO:0006807	biological_process	nitrogen compound metabolic process
OG0000964	endopeptidase La	K01338	lon; ATP-dependent Lon protease	[EC:3.4.21.53]	Cell cycle - Caulobacter	Cell growth and death	Cellular Processes	GO:0071704	biological_process	organic substance metabolic process
OG0000964	endopeptidase La	K01338	lon; ATP-dependent Lon protease	[EC:3.4.21.53]	Cell cycle - Caulobacter	Cell growth and death	Cellular Processes	GO:1901575	biological_process	organic substance catabolic process
OG0000964	endopeptidase La	K01338	lon; ATP-dependent Lon protease	[EC:3.4.21.53]	Cell cycle - Caulobacter	Cell growth and death	Cellular Processes	GO:0009628	biological_process	response to abiotic stimulus
OG0000964	endopeptidase La	K01338	lon; ATP-dependent Lon protease	[EC:3.4.21.53]	Cell cycle - Caulobacter	Cell growth and death	Cellular Processes	GO:0004252	molecular_function	serine-type endopeptidase activity
OG0000964	endopeptidase La	K01338	lon; ATP-dependent Lon protease	[EC:3.4.21.53]	Cell cycle - Caulobacter	Cell growth and death	Cellular Processes	GO:0043167	molecular_function	ion binding
OG0000964	endopeptidase La	K01338	lon; ATP-dependent Lon protease	[EC:3.4.21.53]	Cell cycle - Caulobacter	Cell growth and death	Cellular Processes	GO:0043168	molecular_function	anion binding
OG0000964	endopeptidase La	K01338	lon; ATP-dependent Lon protease	[EC:3.4.21.53]	Cell cycle - Caulobacter	Cell growth and death	Cellular Processes	GO:0043170	biological_process	macromolecule metabolic process
OG0000964	endopeptidase La	K01338	lon; ATP-dependent Lon protease	[EC:3.4.21.53]	Cell cycle - Caulobacter	Cell growth and death	Cellular Processes	GO:0000166	molecular_function	nucleotide binding
OG0000964	endopeptidase La	K01338	lon; ATP-dependent Lon protease	[EC:3.4.21.53]	Cell cycle - Caulobacter	Cell growth and death	Cellular Processes	GO:0006950	biological_process	response to stress
OG0000964	endopeptidase La	K01338	lon; ATP-dependent Lon protease	[EC:3.4.21.53]	Cell cycle - Caulobacter	Cell growth and death	Cellular Processes	GO:0008233	molecular_function	peptidase activity
OG0000964	endopeptidase La	K01338	lon; ATP-dependent Lon protease	[EC:3.4.21.53]	Cell cycle - Caulobacter	Cell growth and death	Cellular Processes	GO:0032553	molecular_function	ribonucleotide binding
OG0000964	endopeptidase La	K01338	lon; ATP-dependent Lon protease	[EC:3.4.21.53]	Cell cycle - Caulobacter	Cell growth and death	Cellular Processes	GO:0032555	molecular_function	purine ribonucleotide binding
OG0000964	endopeptidase La	K01338	lon; ATP-dependent Lon protease	[EC:3.4.21.53]	Cell cycle - Caulobacter	Cell growth and death	Cellular Processes	GO:0008236	molecular_function	serine-type peptidase activity
OG0000964	endopeptidase La	K01338	lon; ATP-dependent Lon protease	[EC:3.4.21.53]	Cell cycle - Caulobacter	Cell growth and death	Cellular Processes	GO:0034605	biological_process	cellular response to heat
OG0000964	endopeptidase La	K01338	lon; ATP-dependent Lon protease	[EC:3.4.21.53]	Cell cycle - Caulobacter	Cell growth and death	Cellular Processes	GO:0043565	molecular_function	sequence-specific DNA binding
OG0000964	endopeptidase La	K01338	lon; ATP-dependent Lon protease	[EC:3.4.21.53]	Cell cycle - Caulobacter	Cell growth and death	Cellular Processes	GO:1901363	molecular_function	heterocyclic compound binding
OG0000964	endopeptidase La	K01338	lon; ATP-dependent Lon protease	[EC:3.4.21.53]	Cell cycle - Caulobacter	Cell growth and death	Cellular Processes	GO:0032559	molecular_function	adenyl ribonucleotide binding
OG0000964	endopeptidase La	K01338	lon; ATP-dependent Lon protease	[EC:3.4.21.53]	Cell cycle - Caulobacter	Cell growth and death	Cellular Processes	GO:0016817	molecular_function	hydrolase activity, acting on acid anhydrides
OG0000964	endopeptidase La	K01338	lon; ATP-dependent Lon protease	[EC:3.4.21.53]	Cell cycle - Caulobacter	Cell growth and death	Cellular Processes	GO:0009266	biological_process	response to temperature stimulus
OG0000964	endopeptidase La	K01338	lon; ATP-dependent Lon protease	[EC:3.4.21.53]	Cell cycle - Caulobacter	Cell growth and death	Cellular Processes	GO:0016818	molecular_function	hydrolase activity, acting on acid anhydrides, in phosphorus-containing anhydrides
OG0000964	endopeptidase La	K01338	lon; ATP-dependent Lon protease	[EC:3.4.21.53]	Cell cycle - Caulobacter	Cell growth and death	Cellular Processes	GO:0017076	molecular_function	purine nucleotide binding
OG0000964	endopeptidase La	K01338	lon; ATP-dependent Lon protease	[EC:3.4.21.53]	Cell cycle - Caulobacter	Cell growth and death	Cellular Processes	GO:0035639	molecular_function	purine ribonucleoside triphosphate binding
OG0000964	endopeptidase La	K01338	lon; ATP-dependent Lon protease	[EC:3.4.21.53]	Cell cycle - Caulobacter	Cell growth and death	Cellular Processes	GO:0009408	biological_process	response to heat
OG0000964	endopeptidase La	K01338	lon; ATP-dependent Lon protease	[EC:3.4.21.53]	Cell cycle - Caulobacter	Cell growth and death	Cellular Processes	GO:0140096	molecular_function	catalytic activity, acting on a protein
OG0000964	endopeptidase La	K01338	lon; ATP-dependent Lon protease	[EC:3.4.21.53]	Cell cycle - Caulobacter	Cell growth and death	Cellular Processes	GO:0005575	cellular_component	cellular_component
OG0000964	endopeptidase La	K01338	lon; ATP-dependent Lon protease	[EC:3.4.21.53]	Cell cycle - Caulobacter	Cell growth and death	Cellular Processes	GO:1901265	molecular_function	nucleoside phosphate binding
OG0000964	endopeptidase La	K01338	lon; ATP-dependent Lon protease	[EC:3.4.21.53]	Cell cycle - Caulobacter	Cell growth and death	Cellular Processes	GO:0044238	biological_process	primary metabolic process
OG0000964	endopeptidase La	K01338	lon; ATP-dependent Lon protease	[EC:3.4.21.53]	Cell cycle - Caulobacter	Cell growth and death	Cellular Processes	GO:0016462	molecular_function	pyrophosphatase activity
OG0000964	endopeptidase La	K01338	lon; ATP-dependent Lon protease	[EC:3.4.21.53]	Cell cycle - Caulobacter	Cell growth and death	Cellular Processes	GO:0004175	molecular_function	endopeptidase activity
OG0000964	endopeptidase La	K01338	lon; ATP-dependent Lon protease	[EC:3.4.21.53]	Cell cycle - Caulobacter	Cell growth and death	Cellular Processes	GO:0050896	biological_process	response to stimulus
OG0000964	endopeptidase La	K01338	lon; ATP-dependent Lon protease	[EC:3.4.21.53]	Cell cycle - Caulobacter	Cell growth and death	Cellular Processes	GO:0004176	molecular_function	ATP-dependent peptidase activity
OG0000964	endopeptidase La	K01338	lon; ATP-dependent Lon protease	[EC:3.4.21.53]	Cell cycle - Caulobacter	Cell growth and death	Cellular Processes	GO:0019538	biological_process	protein metabolic process
OG0000964	endopeptidase La	K01338	lon; ATP-dependent Lon protease	[EC:3.4.21.53]	Cell cycle - Caulobacter	Cell growth and death	Cellular Processes	GO:0030163	biological_process	protein catabolic process
OG0000964	endopeptidase La	K01338	lon; ATP-dependent Lon protease	[EC:3.4.21.53]	Cell cycle - Caulobacter	Cell growth and death	Cellular Processes	GO:0110165	cellular_component	cellular anatomical entity
OG0000964	endopeptidase La	K01338	lon; ATP-dependent Lon protease	[EC:3.4.21.53]	Cell cycle - Caulobacter	Cell growth and death	Cellular Processes	GO:0008150	biological_process	biological_process
OG0000964	endopeptidase La	K01338	lon; ATP-dependent Lon protease	[EC:3.4.21.53]	Cell cycle - Caulobacter	Cell growth and death	Cellular Processes	GO:0097367	molecular_function	carbohydrate derivative binding
OG0000964	endopeptidase La	K01338	lon; ATP-dependent Lon protease	[EC:3.4.21.53]	Cell cycle - Caulobacter	Cell growth and death	Cellular Processes	GO:0017111	molecular_function	ribonucleoside triphosphate phosphatase activity
OG0000964	endopeptidase La	K01338	lon; ATP-dependent Lon protease	[EC:3.4.21.53]	Cell cycle - Caulobacter	Cell growth and death	Cellular Processes	GO:0008152	biological_process	metabolic process
OG0000964	endopeptidase La	K01338	lon; ATP-dependent Lon protease	[EC:3.4.21.53]	Cell cycle - Caulobacter	Cell growth and death	Cellular Processes	GO:0003674	molecular_function	molecular_function
OG0000964	endopeptidase La	K01338	lon; ATP-dependent Lon protease	[EC:3.4.21.53]	Cell cycle - Caulobacter	Cell growth and death	Cellular Processes	GO:0030554	molecular_function	adenyl nucleotide binding
OG0000964	endopeptidase La	K01338	lon; ATP-dependent Lon protease	[EC:3.4.21.53]	Cell cycle - Caulobacter	Cell growth and death	Cellular Processes	GO:0003676	molecular_function	nucleic acid binding
OG0000964	endopeptidase La	K01338	lon; ATP-dependent Lon protease	[EC:3.4.21.53]	Cell cycle - Caulobacter	Cell growth and death	Cellular Processes	GO:0003677	molecular_function	DNA binding
OG0000964	endopeptidase La	K01338	lon; ATP-dependent Lon protease	[EC:3.4.21.53]	Cell cycle - Caulobacter	Cell growth and death	Cellular Processes	GO:0009056	biological_process	catabolic process
OG0000964	endopeptidase La	K01338	lon; ATP-dependent Lon protease	[EC:3.4.21.53]	Cell cycle - Caulobacter	Cell growth and death	Cellular Processes	GO:1901565	biological_process	organonitrogen compound catabolic process
OG0000964	endopeptidase La	K01338	lon; ATP-dependent Lon protease	[EC:3.4.21.53]	Cell cycle - Caulobacter	Cell growth and death	Cellular Processes	GO:1901564	biological_process	organonitrogen compound metabolic process
OG0000964	endopeptidase La	K01338	lon; ATP-dependent Lon protease	[EC:3.4.21.53]	Cell cycle - Caulobacter	Cell growth and death	Cellular Processes	GO:0009057	biological_process	macromolecule catabolic process
OG0000964	endopeptidase La	K01338	lon; ATP-dependent Lon protease	[EC:3.4.21.53]	Cell cycle - Caulobacter	Cell growth and death	Cellular Processes	GO:0005737	cellular_component	cytoplasm
OG0000964	endopeptidase La	K01338	lon; ATP-dependent Lon protease	[EC:3.4.21.53]	Cell cycle - Caulobacter	Cell growth and death	Cellular Processes	GO:0006508	biological_process	proteolysis
OG0000964	endopeptidase La	K01338	lon; ATP-dependent Lon protease	[EC:3.4.21.53]	Cell cycle - Caulobacter	Cell growth and death	Cellular Processes	GO:0005488	molecular_function	binding
OG0000964	endopeptidase La	K01338	lon; ATP-dependent Lon protease	[EC:3.4.21.53]	Cell cycle - Caulobacter	Cell growth and death	Cellular Processes	GO:0003824	molecular_function	catalytic activity
OG0000964	endopeptidase La	K01338	lon; ATP-dependent Lon protease	[EC:3.4.21.53]	Cell cycle - Caulobacter	Cell growth and death	Cellular Processes	GO:0140657	molecular_function	ATP-dependent activity
OG0000964	endopeptidase La	K01338	lon; ATP-dependent Lon protease	[EC:3.4.21.53]	Cell cycle - Caulobacter	Cell growth and death	Cellular Processes	GO:0006515	biological_process	protein quality control for misfolded or incompletely synthesized proteins
OG0000964	endopeptidase La	K01338	lon; ATP-dependent Lon protease	[EC:3.4.21.53]	Cell cycle - Caulobacter	Cell growth and death	Cellular Processes	GO:0005622	cellular_component	intracellular anatomical structure
OG0000964	endopeptidase La	K01338	lon; ATP-dependent Lon protease	[EC:3.4.21.53]	Cell cycle - Caulobacter	Cell growth and death	Cellular Processes	GO:0016887	molecular_function	ATP hydrolysis activity
OG0000964	endopeptidase La	K01338	lon; ATP-dependent Lon protease	[EC:3.4.21.53]	Cell cycle - Caulobacter	Cell growth and death	Cellular Processes	GO:0036094	molecular_function	small molecule binding
OG0000997	aldolase	K01628	fucA; L-fuculose-phosphate aldolase	[EC:4.1.2.17]	Pentose and glucuronate interconversions	Carbohydrate metabolism	Metabolism
OG0000997	aldolase	K01628	fucA; L-fuculose-phosphate aldolase	[EC:4.1.2.17]	Fructose and mannose metabolism	Carbohydrate metabolism	Metabolism
OG0001026	rRNA pseudouridine synthase							GO:0090304	biological_process	nucleic acid metabolic process
OG0001026	rRNA pseudouridine synthase							GO:0009987	biological_process	cellular process
OG0001026	rRNA pseudouridine synthase							GO:0006725	biological_process	cellular aromatic compound metabolic process
OG0001026	rRNA pseudouridine synthase							GO:0016070	biological_process	RNA metabolic process
OG0001026	rRNA pseudouridine synthase							GO:0097159	molecular_function	organic cyclic compound binding
OG0001026	rRNA pseudouridine synthase							GO:0003723	molecular_function	RNA binding
OG0001026	rRNA pseudouridine synthase							GO:0044237	biological_process	cellular metabolic process
OG0001026	rRNA pseudouridine synthase							GO:0044238	biological_process	primary metabolic process
OG0001026	rRNA pseudouridine synthase							GO:0034641	biological_process	cellular nitrogen compound metabolic process
OG0001026	rRNA pseudouridine synthase							GO:0046483	biological_process	heterocycle metabolic process
OG0001026	rRNA pseudouridine synthase							GO:0043412	biological_process	macromolecule modification
OG0001026	rRNA pseudouridine synthase							GO:0016853	molecular_function	isomerase activity
OG0001026	rRNA pseudouridine synthase							GO:0008150	biological_process	biological_process
OG0001026	rRNA pseudouridine synthase							GO:0006807	biological_process	nitrogen compound metabolic process
OG0001026	rRNA pseudouridine synthase							GO:0008152	biological_process	metabolic process
OG0001026	rRNA pseudouridine synthase							GO:0071704	biological_process	organic substance metabolic process
OG0001026	rRNA pseudouridine synthase							GO:0003674	molecular_function	molecular_function
OG0001026	rRNA pseudouridine synthase							GO:0003676	molecular_function	nucleic acid binding
OG0001026	rRNA pseudouridine synthase							GO:0043170	biological_process	macromolecule metabolic process
OG0001026	rRNA pseudouridine synthase							GO:0016866	molecular_function	intramolecular transferase activity
OG0001026	rRNA pseudouridine synthase							GO:0009451	biological_process	RNA modification
OG0001026	rRNA pseudouridine synthase							GO:1901360	biological_process	organic cyclic compound metabolic process
OG0001026	rRNA pseudouridine synthase							GO:1901363	molecular_function	heterocyclic compound binding
OG0001026	rRNA pseudouridine synthase							GO:0005488	molecular_function	binding
OG0001026	rRNA pseudouridine synthase							GO:0003824	molecular_function	catalytic activity
OG0001026	rRNA pseudouridine synthase							GO:0001522	biological_process	pseudouridine synthesis
OG0001026	rRNA pseudouridine synthase							GO:0006139	biological_process	nucleobase-containing compound metabolic process
OG0001026	rRNA pseudouridine synthase							GO:0009982	molecular_function	pseudouridine synthase activity
OG0001028	chromosome segregation protein SMC							GO:0022402	biological_process	cell cycle process
OG0001028	chromosome segregation protein SMC							GO:0009987	biological_process	cellular process
OG0001028	chromosome segregation protein SMC							GO:0097159	molecular_function	organic cyclic compound binding
OG0001028	chromosome segregation protein SMC							GO:0007049	biological_process	cell cycle
OG0001028	chromosome segregation protein SMC							GO:0007059	biological_process	chromosome segregation
OG0001028	chromosome segregation protein SMC							GO:0046483	biological_process	heterocycle metabolic process
OG0001028	chromosome segregation protein SMC							GO:0016787	molecular_function	hydrolase activity
OG0001028	chromosome segregation protein SMC							GO:0005524	molecular_function	ATP binding
OG0001028	chromosome segregation protein SMC							GO:0007062	biological_process	sister chromatid cohesion
OG0001028	chromosome segregation protein SMC							GO:0006807	biological_process	nitrogen compound metabolic process
OG0001028	chromosome segregation protein SMC							GO:0071704	biological_process	organic substance metabolic process
OG0001028	chromosome segregation protein SMC							GO:0043167	molecular_function	ion binding
OG0001028	chromosome segregation protein SMC							GO:0043168	molecular_function	anion binding
OG0001028	chromosome segregation protein SMC							GO:0071840	biological_process	cellular component organization or biogenesis
OG0001028	chromosome segregation protein SMC							GO:0043170	biological_process	macromolecule metabolic process
OG0001028	chromosome segregation protein SMC							GO:0000166	molecular_function	nucleotide binding
OG0001028	chromosome segregation protein SMC							GO:0032553	molecular_function	ribonucleotide binding
OG0001028	chromosome segregation protein SMC							GO:0032555	molecular_function	purine ribonucleotide binding
OG0001028	chromosome segregation protein SMC							GO:0016043	biological_process	cellular component organization
OG0001028	chromosome segregation protein SMC							GO:1901360	biological_process	organic cyclic compound metabolic process
OG0001028	chromosome segregation protein SMC							GO:1901363	molecular_function	heterocyclic compound binding
OG0001028	chromosome segregation protein SMC							GO:0032559	molecular_function	adenyl ribonucleotide binding
OG0001028	chromosome segregation protein SMC							GO:0016817	molecular_function	hydrolase activity, acting on acid anhydrides
OG0001028	chromosome segregation protein SMC							GO:0016818	molecular_function	hydrolase activity, acting on acid anhydrides, in phosphorus-containing anhydrides
OG0001028	chromosome segregation protein SMC							GO:0000819	biological_process	sister chromatid segregation
OG0001028	chromosome segregation protein SMC							GO:0017076	molecular_function	purine nucleotide binding
OG0001028	chromosome segregation protein SMC							GO:0030261	biological_process	chromosome condensation
OG0001028	chromosome segregation protein SMC							GO:0035639	molecular_function	purine ribonucleoside triphosphate binding
OG0001028	chromosome segregation protein SMC							GO:0005694	cellular_component	chromosome
OG0001028	chromosome segregation protein SMC							GO:0090304	biological_process	nucleic acid metabolic process
OG0001028	chromosome segregation protein SMC							GO:0006725	biological_process	cellular aromatic compound metabolic process
OG0001028	chromosome segregation protein SMC							GO:0005575	cellular_component	cellular_component
OG0001028	chromosome segregation protein SMC							GO:1901265	molecular_function	nucleoside phosphate binding
OG0001028	chromosome segregation protein SMC							GO:0051276	biological_process	chromosome organization
OG0001028	chromosome segregation protein SMC							GO:0044237	biological_process	cellular metabolic process
OG0001028	chromosome segregation protein SMC							GO:0044238	biological_process	primary metabolic process
OG0001028	chromosome segregation protein SMC							GO:0016462	molecular_function	pyrophosphatase activity
OG0001028	chromosome segregation protein SMC							GO:0034641	biological_process	cellular nitrogen compound metabolic process
OG0001028	chromosome segregation protein SMC							GO:0006996	biological_process	organelle organization
OG0001028	chromosome segregation protein SMC							GO:0110165	cellular_component	cellular anatomical entity
OG0001028	chromosome segregation protein SMC							GO:0008150	biological_process	biological_process
OG0001028	chromosome segregation protein SMC							GO:0097367	molecular_function	carbohydrate derivative binding
OG0001028	chromosome segregation protein SMC							GO:0017111	molecular_function	ribonucleoside triphosphate phosphatase activity
OG0001028	chromosome segregation protein SMC							GO:0008152	biological_process	metabolic process
OG0001028	chromosome segregation protein SMC							GO:0003674	molecular_function	molecular_function
OG0001028	chromosome segregation protein SMC							GO:0030554	molecular_function	adenyl nucleotide binding
OG0001028	chromosome segregation protein SMC							GO:0043226	cellular_component	organelle
OG0001028	chromosome segregation protein SMC							GO:0003676	molecular_function	nucleic acid binding
OG0001028	chromosome segregation protein SMC							GO:0043228	cellular_component	non-membrane-bounded organelle
OG0001028	chromosome segregation protein SMC							GO:0003677	molecular_function	DNA binding
OG0001028	chromosome segregation protein SMC							GO:0043229	cellular_component	intracellular organelle
OG0001028	chromosome segregation protein SMC							GO:0043232	cellular_component	intracellular non-membrane-bounded organelle
OG0001028	chromosome segregation protein SMC							GO:0044260	biological_process	cellular macromolecule metabolic process
OG0001028	chromosome segregation protein SMC							GO:0005737	cellular_component	cytoplasm
OG0001028	chromosome segregation protein SMC							GO:0005488	molecular_function	binding
OG0001028	chromosome segregation protein SMC							GO:0003824	molecular_function	catalytic activity
OG0001028	chromosome segregation protein SMC							GO:0006259	biological_process	DNA metabolic process
OG0001028	chromosome segregation protein SMC							GO:0140657	molecular_function	ATP-dependent activity
OG0001028	chromosome segregation protein SMC							GO:0006260	biological_process	DNA replication
OG0001028	chromosome segregation protein SMC							GO:0005622	cellular_component	intracellular anatomical structure
OG0001028	chromosome segregation protein SMC							GO:0016887	molecular_function	ATP hydrolysis activity
OG0001028	chromosome segregation protein SMC							GO:0006139	biological_process	nucleobase-containing compound metabolic process
OG0001028	chromosome segregation protein SMC							GO:0098813	biological_process	nuclear chromosome segregation
OG0001028	chromosome segregation protein SMC							GO:0036094	molecular_function	small molecule binding
OG0001074	PHP domain-containing protein							GO:0003824	molecular_function	catalytic activity
OG0001074	PHP domain-containing protein							GO:0003674	molecular_function	molecular_function
OG0001093	Fe-S protein assembly co-chaperone HscB							GO:0009987	biological_process	cellular process
OG0001093	Fe-S protein assembly co-chaperone HscB							GO:0006790	biological_process	sulfur compound metabolic process
OG0001093	Fe-S protein assembly co-chaperone HscB							GO:0001671	molecular_function	ATPase activator activity
OG0001093	Fe-S protein assembly co-chaperone HscB							GO:0140677	molecular_function	molecular function activator activity
OG0001093	Fe-S protein assembly co-chaperone HscB							GO:0005515	molecular_function	protein binding
OG0001093	Fe-S protein assembly co-chaperone HscB							GO:0044237	biological_process	cellular metabolic process
OG0001093	Fe-S protein assembly co-chaperone HscB							GO:0044238	biological_process	primary metabolic process
OG0001093	Fe-S protein assembly co-chaperone HscB							GO:0022607	biological_process	cellular component assembly
OG0001093	Fe-S protein assembly co-chaperone HscB							GO:0051087	molecular_function	chaperone binding
OG0001093	Fe-S protein assembly co-chaperone HscB							GO:0019538	biological_process	protein metabolic process
OG0001093	Fe-S protein assembly co-chaperone HscB							GO:0051604	biological_process	protein maturation
OG0001093	Fe-S protein assembly co-chaperone HscB							GO:0097428	biological_process	protein maturation by iron-sulfur cluster transfer
OG0001093	Fe-S protein assembly co-chaperone HscB							GO:0098772	molecular_function	molecular function regulator activity
OG0001093	Fe-S protein assembly co-chaperone HscB							GO:0008150	biological_process	biological_process
OG0001093	Fe-S protein assembly co-chaperone HscB							GO:0006807	biological_process	nitrogen compound metabolic process
OG0001093	Fe-S protein assembly co-chaperone HscB							GO:0008152	biological_process	metabolic process
OG0001093	Fe-S protein assembly co-chaperone HscB							GO:0071704	biological_process	organic substance metabolic process
OG0001093	Fe-S protein assembly co-chaperone HscB							GO:0003674	molecular_function	molecular_function
OG0001093	Fe-S protein assembly co-chaperone HscB							GO:0044571	biological_process	[2Fe-2S] cluster assembly
OG0001093	Fe-S protein assembly co-chaperone HscB							GO:0043933	biological_process	protein-containing complex organization
OG0001093	Fe-S protein assembly co-chaperone HscB							GO:1901564	biological_process	organonitrogen compound metabolic process
OG0001093	Fe-S protein assembly co-chaperone HscB							GO:0071840	biological_process	cellular component organization or biogenesis
OG0001093	Fe-S protein assembly co-chaperone HscB							GO:0043170	biological_process	macromolecule metabolic process
OG0001093	Fe-S protein assembly co-chaperone HscB							GO:0016226	biological_process	iron-sulfur cluster assembly
OG0001093	Fe-S protein assembly co-chaperone HscB							GO:0010467	biological_process	gene expression
OG0001093	Fe-S protein assembly co-chaperone HscB							GO:0065003	biological_process	protein-containing complex assembly
OG0001093	Fe-S protein assembly co-chaperone HscB							GO:0016043	biological_process	cellular component organization
OG0001093	Fe-S protein assembly co-chaperone HscB							GO:0005488	molecular_function	binding
OG0001093	Fe-S protein assembly co-chaperone HscB							GO:0044085	biological_process	cellular component biogenesis
OG0001093	Fe-S protein assembly co-chaperone HscB							GO:0006457	biological_process	protein folding
OG0001093	Fe-S protein assembly co-chaperone HscB							GO:0051259	biological_process	protein complex oligomerization
OG0001093	Fe-S protein assembly co-chaperone HscB							GO:0031163	biological_process	metallo-sulfur cluster assembly
OG0001104	dihydrolipoyllysine-residue acetyltransferase	K00627	DLAT, aceF, pdhC; pyruvate dehydrogenase E2 component (dihydrolipoamide acetyltransferase)	[EC:2.3.1.12]	Glycolysis / Gluconeogenesis	Carbohydrate metabolism	Metabolism	GO:0009987	biological_process	cellular process
OG0001104	dihydrolipoyllysine-residue acetyltransferase	K00627	DLAT, aceF, pdhC; pyruvate dehydrogenase E2 component (dihydrolipoamide acetyltransferase)	[EC:2.3.1.12]	Glycolysis / Gluconeogenesis	Carbohydrate metabolism	Metabolism	GO:1902494	cellular_component	catalytic complex
OG0001104	dihydrolipoyllysine-residue acetyltransferase	K00627	DLAT, aceF, pdhC; pyruvate dehydrogenase E2 component (dihydrolipoamide acetyltransferase)	[EC:2.3.1.12]	Glycolysis / Gluconeogenesis	Carbohydrate metabolism	Metabolism	GO:0004742	molecular_function	dihydrolipoyllysine-residue acetyltransferase activity
OG0001104	dihydrolipoyllysine-residue acetyltransferase	K00627	DLAT, aceF, pdhC; pyruvate dehydrogenase E2 component (dihydrolipoamide acetyltransferase)	[EC:2.3.1.12]	Glycolysis / Gluconeogenesis	Carbohydrate metabolism	Metabolism	GO:0006793	biological_process	phosphorus metabolic process
OG0001104	dihydrolipoyllysine-residue acetyltransferase	K00627	DLAT, aceF, pdhC; pyruvate dehydrogenase E2 component (dihydrolipoamide acetyltransferase)	[EC:2.3.1.12]	Glycolysis / Gluconeogenesis	Carbohydrate metabolism	Metabolism	GO:0006796	biological_process	phosphate-containing compound metabolic process
OG0001104	dihydrolipoyllysine-residue acetyltransferase	K00627	DLAT, aceF, pdhC; pyruvate dehydrogenase E2 component (dihydrolipoamide acetyltransferase)	[EC:2.3.1.12]	Glycolysis / Gluconeogenesis	Carbohydrate metabolism	Metabolism	GO:0032787	biological_process	monocarboxylic acid metabolic process
OG0001104	dihydrolipoyllysine-residue acetyltransferase	K00627	DLAT, aceF, pdhC; pyruvate dehydrogenase E2 component (dihydrolipoamide acetyltransferase)	[EC:2.3.1.12]	Glycolysis / Gluconeogenesis	Carbohydrate metabolism	Metabolism	GO:0046483	biological_process	heterocycle metabolic process
OG0001104	dihydrolipoyllysine-residue acetyltransferase	K00627	DLAT, aceF, pdhC; pyruvate dehydrogenase E2 component (dihydrolipoamide acetyltransferase)	[EC:2.3.1.12]	Glycolysis / Gluconeogenesis	Carbohydrate metabolism	Metabolism	GO:0006163	biological_process	purine nucleotide metabolic process
OG0001104	dihydrolipoyllysine-residue acetyltransferase	K00627	DLAT, aceF, pdhC; pyruvate dehydrogenase E2 component (dihydrolipoamide acetyltransferase)	[EC:2.3.1.12]	Glycolysis / Gluconeogenesis	Carbohydrate metabolism	Metabolism	GO:0006165	biological_process	nucleoside diphosphate phosphorylation
OG0001104	dihydrolipoyllysine-residue acetyltransferase	K00627	DLAT, aceF, pdhC; pyruvate dehydrogenase E2 component (dihydrolipoamide acetyltransferase)	[EC:2.3.1.12]	Glycolysis / Gluconeogenesis	Carbohydrate metabolism	Metabolism	GO:0006807	biological_process	nitrogen compound metabolic process
OG0001104	dihydrolipoyllysine-residue acetyltransferase	K00627	DLAT, aceF, pdhC; pyruvate dehydrogenase E2 component (dihydrolipoamide acetyltransferase)	[EC:2.3.1.12]	Glycolysis / Gluconeogenesis	Carbohydrate metabolism	Metabolism	GO:0016407	molecular_function	acetyltransferase activity
OG0001104	dihydrolipoyllysine-residue acetyltransferase	K00627	DLAT, aceF, pdhC; pyruvate dehydrogenase E2 component (dihydrolipoamide acetyltransferase)	[EC:2.3.1.12]	Glycolysis / Gluconeogenesis	Carbohydrate metabolism	Metabolism	GO:0071704	biological_process	organic substance metabolic process
OG0001104	dihydrolipoyllysine-residue acetyltransferase	K00627	DLAT, aceF, pdhC; pyruvate dehydrogenase E2 component (dihydrolipoamide acetyltransferase)	[EC:2.3.1.12]	Glycolysis / Gluconeogenesis	Carbohydrate metabolism	Metabolism	GO:1901575	biological_process	organic substance catabolic process
OG0001104	dihydrolipoyllysine-residue acetyltransferase	K00627	DLAT, aceF, pdhC; pyruvate dehydrogenase E2 component (dihydrolipoamide acetyltransferase)	[EC:2.3.1.12]	Glycolysis / Gluconeogenesis	Carbohydrate metabolism	Metabolism	GO:0009117	biological_process	nucleotide metabolic process
OG0001104	dihydrolipoyllysine-residue acetyltransferase	K00627	DLAT, aceF, pdhC; pyruvate dehydrogenase E2 component (dihydrolipoamide acetyltransferase)	[EC:2.3.1.12]	Glycolysis / Gluconeogenesis	Carbohydrate metabolism	Metabolism	GO:0016417	molecular_function	S-acyltransferase activity
OG0001104	dihydrolipoyllysine-residue acetyltransferase	K00627	DLAT, aceF, pdhC; pyruvate dehydrogenase E2 component (dihydrolipoamide acetyltransferase)	[EC:2.3.1.12]	Glycolysis / Gluconeogenesis	Carbohydrate metabolism	Metabolism	GO:1990204	cellular_component	oxidoreductase complex
OG0001104	dihydrolipoyllysine-residue acetyltransferase	K00627	DLAT, aceF, pdhC; pyruvate dehydrogenase E2 component (dihydrolipoamide acetyltransferase)	[EC:2.3.1.12]	Glycolysis / Gluconeogenesis	Carbohydrate metabolism	Metabolism	GO:0016418	molecular_function	S-acetyltransferase activity
OG0001104	dihydrolipoyllysine-residue acetyltransferase	K00627	DLAT, aceF, pdhC; pyruvate dehydrogenase E2 component (dihydrolipoamide acetyltransferase)	[EC:2.3.1.12]	Glycolysis / Gluconeogenesis	Carbohydrate metabolism	Metabolism	GO:0019752	biological_process	carboxylic acid metabolic process
OG0001104	dihydrolipoyllysine-residue acetyltransferase	K00627	DLAT, aceF, pdhC; pyruvate dehydrogenase E2 component (dihydrolipoamide acetyltransferase)	[EC:2.3.1.12]	Glycolysis / Gluconeogenesis	Carbohydrate metabolism	Metabolism	GO:0009259	biological_process	ribonucleotide metabolic process
OG0001104	dihydrolipoyllysine-residue acetyltransferase	K00627	DLAT, aceF, pdhC; pyruvate dehydrogenase E2 component (dihydrolipoamide acetyltransferase)	[EC:2.3.1.12]	Glycolysis / Gluconeogenesis	Carbohydrate metabolism	Metabolism	GO:0043436	biological_process	oxoacid metabolic process
OG0001104	dihydrolipoyllysine-residue acetyltransferase	K00627	DLAT, aceF, pdhC; pyruvate dehydrogenase E2 component (dihydrolipoamide acetyltransferase)	[EC:2.3.1.12]	Glycolysis / Gluconeogenesis	Carbohydrate metabolism	Metabolism	GO:0009132	biological_process	nucleoside diphosphate metabolic process
OG0001104	dihydrolipoyllysine-residue acetyltransferase	K00627	DLAT, aceF, pdhC; pyruvate dehydrogenase E2 component (dihydrolipoamide acetyltransferase)	[EC:2.3.1.12]	Glycolysis / Gluconeogenesis	Carbohydrate metabolism	Metabolism	GO:1901360	biological_process	organic cyclic compound metabolic process
OG0001104	dihydrolipoyllysine-residue acetyltransferase	K00627	DLAT, aceF, pdhC; pyruvate dehydrogenase E2 component (dihydrolipoamide acetyltransferase)	[EC:2.3.1.12]	Glycolysis / Gluconeogenesis	Carbohydrate metabolism	Metabolism	GO:0055086	biological_process	nucleobase-containing small molecule metabolic process
OG0001104	dihydrolipoyllysine-residue acetyltransferase	K00627	DLAT, aceF, pdhC; pyruvate dehydrogenase E2 component (dihydrolipoamide acetyltransferase)	[EC:2.3.1.12]	Glycolysis / Gluconeogenesis	Carbohydrate metabolism	Metabolism	GO:0009135	biological_process	purine nucleoside diphosphate metabolic process
OG0001104	dihydrolipoyllysine-residue acetyltransferase	K00627	DLAT, aceF, pdhC; pyruvate dehydrogenase E2 component (dihydrolipoamide acetyltransferase)	[EC:2.3.1.12]	Glycolysis / Gluconeogenesis	Carbohydrate metabolism	Metabolism	GO:0016052	biological_process	carbohydrate catabolic process
OG0001104	dihydrolipoyllysine-residue acetyltransferase	K00627	DLAT, aceF, pdhC; pyruvate dehydrogenase E2 component (dihydrolipoamide acetyltransferase)	[EC:2.3.1.12]	Glycolysis / Gluconeogenesis	Carbohydrate metabolism	Metabolism	GO:0019637	biological_process	organophosphate metabolic process
OG0001104	dihydrolipoyllysine-residue acetyltransferase	K00627	DLAT, aceF, pdhC; pyruvate dehydrogenase E2 component (dihydrolipoamide acetyltransferase)	[EC:2.3.1.12]	Glycolysis / Gluconeogenesis	Carbohydrate metabolism	Metabolism	GO:0009141	biological_process	nucleoside triphosphate metabolic process
OG0001104	dihydrolipoyllysine-residue acetyltransferase	K00627	DLAT, aceF, pdhC; pyruvate dehydrogenase E2 component (dihydrolipoamide acetyltransferase)	[EC:2.3.1.12]	Glycolysis / Gluconeogenesis	Carbohydrate metabolism	Metabolism	GO:0016310	biological_process	phosphorylation
OG0001104	dihydrolipoyllysine-residue acetyltransferase	K00627	DLAT, aceF, pdhC; pyruvate dehydrogenase E2 component (dihydrolipoamide acetyltransferase)	[EC:2.3.1.12]	Glycolysis / Gluconeogenesis	Carbohydrate metabolism	Metabolism	GO:0009144	biological_process	purine nucleoside triphosphate metabolic process
OG0001104	dihydrolipoyllysine-residue acetyltransferase	K00627	DLAT, aceF, pdhC; pyruvate dehydrogenase E2 component (dihydrolipoamide acetyltransferase)	[EC:2.3.1.12]	Glycolysis / Gluconeogenesis	Carbohydrate metabolism	Metabolism	GO:0030523	molecular_function	dihydrolipoamide S-acyltransferase activity
OG0001104	dihydrolipoyllysine-residue acetyltransferase	K00627	DLAT, aceF, pdhC; pyruvate dehydrogenase E2 component (dihydrolipoamide acetyltransferase)	[EC:2.3.1.12]	Glycolysis / Gluconeogenesis	Carbohydrate metabolism	Metabolism	GO:0009150	biological_process	purine ribonucleotide metabolic process
OG0001104	dihydrolipoyllysine-residue acetyltransferase	K00627	DLAT, aceF, pdhC; pyruvate dehydrogenase E2 component (dihydrolipoamide acetyltransferase)	[EC:2.3.1.12]	Glycolysis / Gluconeogenesis	Carbohydrate metabolism	Metabolism	GO:0006082	biological_process	organic acid metabolic process
OG0001104	dihydrolipoyllysine-residue acetyltransferase	K00627	DLAT, aceF, pdhC; pyruvate dehydrogenase E2 component (dihydrolipoamide acetyltransferase)	[EC:2.3.1.12]	Glycolysis / Gluconeogenesis	Carbohydrate metabolism	Metabolism	GO:0140096	molecular_function	catalytic activity, acting on a protein
OG0001104	dihydrolipoyllysine-residue acetyltransferase	K00627	DLAT, aceF, pdhC; pyruvate dehydrogenase E2 component (dihydrolipoamide acetyltransferase)	[EC:2.3.1.12]	Glycolysis / Gluconeogenesis	Carbohydrate metabolism	Metabolism	GO:0006725	biological_process	cellular aromatic compound metabolic process
OG0001104	dihydrolipoyllysine-residue acetyltransferase	K00627	DLAT, aceF, pdhC; pyruvate dehydrogenase E2 component (dihydrolipoamide acetyltransferase)	[EC:2.3.1.12]	Glycolysis / Gluconeogenesis	Carbohydrate metabolism	Metabolism	GO:0045254	cellular_component	pyruvate dehydrogenase complex
OG0001104	dihydrolipoyllysine-residue acetyltransferase	K00627	DLAT, aceF, pdhC; pyruvate dehydrogenase E2 component (dihydrolipoamide acetyltransferase)	[EC:2.3.1.12]	Glycolysis / Gluconeogenesis	Carbohydrate metabolism	Metabolism	GO:0005575	cellular_component	cellular_component
OG0001104	dihydrolipoyllysine-residue acetyltransferase	K00627	DLAT, aceF, pdhC; pyruvate dehydrogenase E2 component (dihydrolipoamide acetyltransferase)	[EC:2.3.1.12]	Glycolysis / Gluconeogenesis	Carbohydrate metabolism	Metabolism	GO:0072521	biological_process	purine-containing compound metabolic process
OG0001104	dihydrolipoyllysine-residue acetyltransferase	K00627	DLAT, aceF, pdhC; pyruvate dehydrogenase E2 component (dihydrolipoamide acetyltransferase)	[EC:2.3.1.12]	Glycolysis / Gluconeogenesis	Carbohydrate metabolism	Metabolism	GO:0006090	biological_process	pyruvate metabolic process
OG0001104	dihydrolipoyllysine-residue acetyltransferase	K00627	DLAT, aceF, pdhC; pyruvate dehydrogenase E2 component (dihydrolipoamide acetyltransferase)	[EC:2.3.1.12]	Glycolysis / Gluconeogenesis	Carbohydrate metabolism	Metabolism	GO:0006091	biological_process	generation of precursor metabolites and energy
OG0001104	dihydrolipoyllysine-residue acetyltransferase	K00627	DLAT, aceF, pdhC; pyruvate dehydrogenase E2 component (dihydrolipoamide acetyltransferase)	[EC:2.3.1.12]	Glycolysis / Gluconeogenesis	Carbohydrate metabolism	Metabolism	GO:0044237	biological_process	cellular metabolic process
OG0001104	dihydrolipoyllysine-residue acetyltransferase	K00627	DLAT, aceF, pdhC; pyruvate dehydrogenase E2 component (dihydrolipoamide acetyltransferase)	[EC:2.3.1.12]	Glycolysis / Gluconeogenesis	Carbohydrate metabolism	Metabolism	GO:0044238	biological_process	primary metabolic process
OG0001104	dihydrolipoyllysine-residue acetyltransferase	K00627	DLAT, aceF, pdhC; pyruvate dehydrogenase E2 component (dihydrolipoamide acetyltransferase)	[EC:2.3.1.12]	Glycolysis / Gluconeogenesis	Carbohydrate metabolism	Metabolism	GO:0046031	biological_process	ADP metabolic process
OG0001104	dihydrolipoyllysine-residue acetyltransferase	K00627	DLAT, aceF, pdhC; pyruvate dehydrogenase E2 component (dihydrolipoamide acetyltransferase)	[EC:2.3.1.12]	Glycolysis / Gluconeogenesis	Carbohydrate metabolism	Metabolism	GO:0006096	biological_process	glycolytic process
OG0001104	dihydrolipoyllysine-residue acetyltransferase	K00627	DLAT, aceF, pdhC; pyruvate dehydrogenase E2 component (dihydrolipoamide acetyltransferase)	[EC:2.3.1.12]	Glycolysis / Gluconeogenesis	Carbohydrate metabolism	Metabolism	GO:0034641	biological_process	cellular nitrogen compound metabolic process
OG0001104	dihydrolipoyllysine-residue acetyltransferase	K00627	DLAT, aceF, pdhC; pyruvate dehydrogenase E2 component (dihydrolipoamide acetyltransferase)	[EC:2.3.1.12]	Glycolysis / Gluconeogenesis	Carbohydrate metabolism	Metabolism	GO:1901135	biological_process	carbohydrate derivative metabolic process
OG0001104	dihydrolipoyllysine-residue acetyltransferase	K00627	DLAT, aceF, pdhC; pyruvate dehydrogenase E2 component (dihydrolipoamide acetyltransferase)	[EC:2.3.1.12]	Glycolysis / Gluconeogenesis	Carbohydrate metabolism	Metabolism	GO:0046034	biological_process	ATP metabolic process
OG0001104	dihydrolipoyllysine-residue acetyltransferase	K00627	DLAT, aceF, pdhC; pyruvate dehydrogenase E2 component (dihydrolipoamide acetyltransferase)	[EC:2.3.1.12]	Glycolysis / Gluconeogenesis	Carbohydrate metabolism	Metabolism	GO:0110165	cellular_component	cellular anatomical entity
OG0001104	dihydrolipoyllysine-residue acetyltransferase	K00627	DLAT, aceF, pdhC; pyruvate dehydrogenase E2 component (dihydrolipoamide acetyltransferase)	[EC:2.3.1.12]	Glycolysis / Gluconeogenesis	Carbohydrate metabolism	Metabolism	GO:0008150	biological_process	biological_process
OG0001104	dihydrolipoyllysine-residue acetyltransferase	K00627	DLAT, aceF, pdhC; pyruvate dehydrogenase E2 component (dihydrolipoamide acetyltransferase)	[EC:2.3.1.12]	Glycolysis / Gluconeogenesis	Carbohydrate metabolism	Metabolism	GO:0005975	biological_process	carbohydrate metabolic process
OG0001104	dihydrolipoyllysine-residue acetyltransferase	K00627	DLAT, aceF, pdhC; pyruvate dehydrogenase E2 component (dihydrolipoamide acetyltransferase)	[EC:2.3.1.12]	Glycolysis / Gluconeogenesis	Carbohydrate metabolism	Metabolism	GO:0008152	biological_process	metabolic process
OG0001104	dihydrolipoyllysine-residue acetyltransferase	K00627	DLAT, aceF, pdhC; pyruvate dehydrogenase E2 component (dihydrolipoamide acetyltransferase)	[EC:2.3.1.12]	Glycolysis / Gluconeogenesis	Carbohydrate metabolism	Metabolism	GO:0003674	molecular_function	molecular_function
OG0001104	dihydrolipoyllysine-residue acetyltransferase	K00627	DLAT, aceF, pdhC; pyruvate dehydrogenase E2 component (dihydrolipoamide acetyltransferase)	[EC:2.3.1.12]	Glycolysis / Gluconeogenesis	Carbohydrate metabolism	Metabolism	GO:0046939	biological_process	nucleotide phosphorylation
OG0001104	dihydrolipoyllysine-residue acetyltransferase	K00627	DLAT, aceF, pdhC; pyruvate dehydrogenase E2 component (dihydrolipoamide acetyltransferase)	[EC:2.3.1.12]	Glycolysis / Gluconeogenesis	Carbohydrate metabolism	Metabolism	GO:0009179	biological_process	purine ribonucleoside diphosphate metabolic process
OG0001104	dihydrolipoyllysine-residue acetyltransferase	K00627	DLAT, aceF, pdhC; pyruvate dehydrogenase E2 component (dihydrolipoamide acetyltransferase)	[EC:2.3.1.12]	Glycolysis / Gluconeogenesis	Carbohydrate metabolism	Metabolism	GO:0032991	cellular_component	protein-containing complex
OG0001104	dihydrolipoyllysine-residue acetyltransferase	K00627	DLAT, aceF, pdhC; pyruvate dehydrogenase E2 component (dihydrolipoamide acetyltransferase)	[EC:2.3.1.12]	Glycolysis / Gluconeogenesis	Carbohydrate metabolism	Metabolism	GO:0009056	biological_process	catabolic process
OG0001104	dihydrolipoyllysine-residue acetyltransferase	K00627	DLAT, aceF, pdhC; pyruvate dehydrogenase E2 component (dihydrolipoamide acetyltransferase)	[EC:2.3.1.12]	Glycolysis / Gluconeogenesis	Carbohydrate metabolism	Metabolism	GO:0006753	biological_process	nucleoside phosphate metabolic process
OG0001104	dihydrolipoyllysine-residue acetyltransferase	K00627	DLAT, aceF, pdhC; pyruvate dehydrogenase E2 component (dihydrolipoamide acetyltransferase)	[EC:2.3.1.12]	Glycolysis / Gluconeogenesis	Carbohydrate metabolism	Metabolism	GO:1901564	biological_process	organonitrogen compound metabolic process
OG0001104	dihydrolipoyllysine-residue acetyltransferase	K00627	DLAT, aceF, pdhC; pyruvate dehydrogenase E2 component (dihydrolipoamide acetyltransferase)	[EC:2.3.1.12]	Glycolysis / Gluconeogenesis	Carbohydrate metabolism	Metabolism	GO:0009185	biological_process	ribonucleoside diphosphate metabolic process
OG0001104	dihydrolipoyllysine-residue acetyltransferase	K00627	DLAT, aceF, pdhC; pyruvate dehydrogenase E2 component (dihydrolipoamide acetyltransferase)	[EC:2.3.1.12]	Glycolysis / Gluconeogenesis	Carbohydrate metabolism	Metabolism	GO:0016740	molecular_function	transferase activity
OG0001104	dihydrolipoyllysine-residue acetyltransferase	K00627	DLAT, aceF, pdhC; pyruvate dehydrogenase E2 component (dihydrolipoamide acetyltransferase)	[EC:2.3.1.12]	Glycolysis / Gluconeogenesis	Carbohydrate metabolism	Metabolism	GO:0006757	biological_process	ATP generation from ADP
OG0001104	dihydrolipoyllysine-residue acetyltransferase	K00627	DLAT, aceF, pdhC; pyruvate dehydrogenase E2 component (dihydrolipoamide acetyltransferase)	[EC:2.3.1.12]	Glycolysis / Gluconeogenesis	Carbohydrate metabolism	Metabolism	GO:0005737	cellular_component	cytoplasm
OG0001104	dihydrolipoyllysine-residue acetyltransferase	K00627	DLAT, aceF, pdhC; pyruvate dehydrogenase E2 component (dihydrolipoamide acetyltransferase)	[EC:2.3.1.12]	Glycolysis / Gluconeogenesis	Carbohydrate metabolism	Metabolism	GO:0016746	molecular_function	acyltransferase activity
OG0001104	dihydrolipoyllysine-residue acetyltransferase	K00627	DLAT, aceF, pdhC; pyruvate dehydrogenase E2 component (dihydrolipoamide acetyltransferase)	[EC:2.3.1.12]	Glycolysis / Gluconeogenesis	Carbohydrate metabolism	Metabolism	GO:0016747	molecular_function	acyltransferase activity, transferring groups other than amino-acyl groups
OG0001104	dihydrolipoyllysine-residue acetyltransferase	K00627	DLAT, aceF, pdhC; pyruvate dehydrogenase E2 component (dihydrolipoamide acetyltransferase)	[EC:2.3.1.12]	Glycolysis / Gluconeogenesis	Carbohydrate metabolism	Metabolism	GO:0019693	biological_process	ribose phosphate metabolic process
OG0001104	dihydrolipoyllysine-residue acetyltransferase	K00627	DLAT, aceF, pdhC; pyruvate dehydrogenase E2 component (dihydrolipoamide acetyltransferase)	[EC:2.3.1.12]	Glycolysis / Gluconeogenesis	Carbohydrate metabolism	Metabolism	GO:0009199	biological_process	ribonucleoside triphosphate metabolic process
OG0001104	dihydrolipoyllysine-residue acetyltransferase	K00627	DLAT, aceF, pdhC; pyruvate dehydrogenase E2 component (dihydrolipoamide acetyltransferase)	[EC:2.3.1.12]	Glycolysis / Gluconeogenesis	Carbohydrate metabolism	Metabolism	GO:0003824	molecular_function	catalytic activity
OG0001104	dihydrolipoyllysine-residue acetyltransferase	K00627	DLAT, aceF, pdhC; pyruvate dehydrogenase E2 component (dihydrolipoamide acetyltransferase)	[EC:2.3.1.12]	Glycolysis / Gluconeogenesis	Carbohydrate metabolism	Metabolism	GO:0009205	biological_process	purine ribonucleoside triphosphate metabolic process
OG0001104	dihydrolipoyllysine-residue acetyltransferase	K00627	DLAT, aceF, pdhC; pyruvate dehydrogenase E2 component (dihydrolipoamide acetyltransferase)	[EC:2.3.1.12]	Glycolysis / Gluconeogenesis	Carbohydrate metabolism	Metabolism	GO:0005622	cellular_component	intracellular anatomical structure
OG0001104	dihydrolipoyllysine-residue acetyltransferase	K00627	DLAT, aceF, pdhC; pyruvate dehydrogenase E2 component (dihydrolipoamide acetyltransferase)	[EC:2.3.1.12]	Glycolysis / Gluconeogenesis	Carbohydrate metabolism	Metabolism	GO:0044281	biological_process	small molecule metabolic process
OG0001104	dihydrolipoyllysine-residue acetyltransferase	K00627	DLAT, aceF, pdhC; pyruvate dehydrogenase E2 component (dihydrolipoamide acetyltransferase)	[EC:2.3.1.12]	Glycolysis / Gluconeogenesis	Carbohydrate metabolism	Metabolism	GO:0006139	biological_process	nucleobase-containing compound metabolic process
OG0001104	dihydrolipoyllysine-residue acetyltransferase	K00627	DLAT, aceF, pdhC; pyruvate dehydrogenase E2 component (dihydrolipoamide acetyltransferase)	[EC:2.3.1.12]	Citrate cycle (TCA cycle)	Carbohydrate metabolism	Metabolism	GO:0009987	biological_process	cellular process
OG0001104	dihydrolipoyllysine-residue acetyltransferase	K00627	DLAT, aceF, pdhC; pyruvate dehydrogenase E2 component (dihydrolipoamide acetyltransferase)	[EC:2.3.1.12]	Citrate cycle (TCA cycle)	Carbohydrate metabolism	Metabolism	GO:1902494	cellular_component	catalytic complex
OG0001104	dihydrolipoyllysine-residue acetyltransferase	K00627	DLAT, aceF, pdhC; pyruvate dehydrogenase E2 component (dihydrolipoamide acetyltransferase)	[EC:2.3.1.12]	Citrate cycle (TCA cycle)	Carbohydrate metabolism	Metabolism	GO:0004742	molecular_function	dihydrolipoyllysine-residue acetyltransferase activity
OG0001104	dihydrolipoyllysine-residue acetyltransferase	K00627	DLAT, aceF, pdhC; pyruvate dehydrogenase E2 component (dihydrolipoamide acetyltransferase)	[EC:2.3.1.12]	Citrate cycle (TCA cycle)	Carbohydrate metabolism	Metabolism	GO:0006793	biological_process	phosphorus metabolic process
OG0001104	dihydrolipoyllysine-residue acetyltransferase	K00627	DLAT, aceF, pdhC; pyruvate dehydrogenase E2 component (dihydrolipoamide acetyltransferase)	[EC:2.3.1.12]	Citrate cycle (TCA cycle)	Carbohydrate metabolism	Metabolism	GO:0006796	biological_process	phosphate-containing compound metabolic process
OG0001104	dihydrolipoyllysine-residue acetyltransferase	K00627	DLAT, aceF, pdhC; pyruvate dehydrogenase E2 component (dihydrolipoamide acetyltransferase)	[EC:2.3.1.12]	Citrate cycle (TCA cycle)	Carbohydrate metabolism	Metabolism	GO:0032787	biological_process	monocarboxylic acid metabolic process
OG0001104	dihydrolipoyllysine-residue acetyltransferase	K00627	DLAT, aceF, pdhC; pyruvate dehydrogenase E2 component (dihydrolipoamide acetyltransferase)	[EC:2.3.1.12]	Citrate cycle (TCA cycle)	Carbohydrate metabolism	Metabolism	GO:0046483	biological_process	heterocycle metabolic process
OG0001104	dihydrolipoyllysine-residue acetyltransferase	K00627	DLAT, aceF, pdhC; pyruvate dehydrogenase E2 component (dihydrolipoamide acetyltransferase)	[EC:2.3.1.12]	Citrate cycle (TCA cycle)	Carbohydrate metabolism	Metabolism	GO:0006163	biological_process	purine nucleotide metabolic process
OG0001104	dihydrolipoyllysine-residue acetyltransferase	K00627	DLAT, aceF, pdhC; pyruvate dehydrogenase E2 component (dihydrolipoamide acetyltransferase)	[EC:2.3.1.12]	Citrate cycle (TCA cycle)	Carbohydrate metabolism	Metabolism	GO:0006165	biological_process	nucleoside diphosphate phosphorylation
OG0001104	dihydrolipoyllysine-residue acetyltransferase	K00627	DLAT, aceF, pdhC; pyruvate dehydrogenase E2 component (dihydrolipoamide acetyltransferase)	[EC:2.3.1.12]	Citrate cycle (TCA cycle)	Carbohydrate metabolism	Metabolism	GO:0006807	biological_process	nitrogen compound metabolic process
OG0001104	dihydrolipoyllysine-residue acetyltransferase	K00627	DLAT, aceF, pdhC; pyruvate dehydrogenase E2 component (dihydrolipoamide acetyltransferase)	[EC:2.3.1.12]	Citrate cycle (TCA cycle)	Carbohydrate metabolism	Metabolism	GO:0016407	molecular_function	acetyltransferase activity
OG0001104	dihydrolipoyllysine-residue acetyltransferase	K00627	DLAT, aceF, pdhC; pyruvate dehydrogenase E2 component (dihydrolipoamide acetyltransferase)	[EC:2.3.1.12]	Citrate cycle (TCA cycle)	Carbohydrate metabolism	Metabolism	GO:0071704	biological_process	organic substance metabolic process
OG0001104	dihydrolipoyllysine-residue acetyltransferase	K00627	DLAT, aceF, pdhC; pyruvate dehydrogenase E2 component (dihydrolipoamide acetyltransferase)	[EC:2.3.1.12]	Citrate cycle (TCA cycle)	Carbohydrate metabolism	Metabolism	GO:1901575	biological_process	organic substance catabolic process
OG0001104	dihydrolipoyllysine-residue acetyltransferase	K00627	DLAT, aceF, pdhC; pyruvate dehydrogenase E2 component (dihydrolipoamide acetyltransferase)	[EC:2.3.1.12]	Citrate cycle (TCA cycle)	Carbohydrate metabolism	Metabolism	GO:0009117	biological_process	nucleotide metabolic process
OG0001104	dihydrolipoyllysine-residue acetyltransferase	K00627	DLAT, aceF, pdhC; pyruvate dehydrogenase E2 component (dihydrolipoamide acetyltransferase)	[EC:2.3.1.12]	Citrate cycle (TCA cycle)	Carbohydrate metabolism	Metabolism	GO:0016417	molecular_function	S-acyltransferase activity
OG0001104	dihydrolipoyllysine-residue acetyltransferase	K00627	DLAT, aceF, pdhC; pyruvate dehydrogenase E2 component (dihydrolipoamide acetyltransferase)	[EC:2.3.1.12]	Citrate cycle (TCA cycle)	Carbohydrate metabolism	Metabolism	GO:1990204	cellular_component	oxidoreductase complex
OG0001104	dihydrolipoyllysine-residue acetyltransferase	K00627	DLAT, aceF, pdhC; pyruvate dehydrogenase E2 component (dihydrolipoamide acetyltransferase)	[EC:2.3.1.12]	Citrate cycle (TCA cycle)	Carbohydrate metabolism	Metabolism	GO:0016418	molecular_function	S-acetyltransferase activity
OG0001104	dihydrolipoyllysine-residue acetyltransferase	K00627	DLAT, aceF, pdhC; pyruvate dehydrogenase E2 component (dihydrolipoamide acetyltransferase)	[EC:2.3.1.12]	Citrate cycle (TCA cycle)	Carbohydrate metabolism	Metabolism	GO:0019752	biological_process	carboxylic acid metabolic process
OG0001104	dihydrolipoyllysine-residue acetyltransferase	K00627	DLAT, aceF, pdhC; pyruvate dehydrogenase E2 component (dihydrolipoamide acetyltransferase)	[EC:2.3.1.12]	Citrate cycle (TCA cycle)	Carbohydrate metabolism	Metabolism	GO:0009259	biological_process	ribonucleotide metabolic process
OG0001104	dihydrolipoyllysine-residue acetyltransferase	K00627	DLAT, aceF, pdhC; pyruvate dehydrogenase E2 component (dihydrolipoamide acetyltransferase)	[EC:2.3.1.12]	Citrate cycle (TCA cycle)	Carbohydrate metabolism	Metabolism	GO:0043436	biological_process	oxoacid metabolic process
OG0001104	dihydrolipoyllysine-residue acetyltransferase	K00627	DLAT, aceF, pdhC; pyruvate dehydrogenase E2 component (dihydrolipoamide acetyltransferase)	[EC:2.3.1.12]	Citrate cycle (TCA cycle)	Carbohydrate metabolism	Metabolism	GO:0009132	biological_process	nucleoside diphosphate metabolic process
OG0001104	dihydrolipoyllysine-residue acetyltransferase	K00627	DLAT, aceF, pdhC; pyruvate dehydrogenase E2 component (dihydrolipoamide acetyltransferase)	[EC:2.3.1.12]	Citrate cycle (TCA cycle)	Carbohydrate metabolism	Metabolism	GO:1901360	biological_process	organic cyclic compound metabolic process
OG0001104	dihydrolipoyllysine-residue acetyltransferase	K00627	DLAT, aceF, pdhC; pyruvate dehydrogenase E2 component (dihydrolipoamide acetyltransferase)	[EC:2.3.1.12]	Citrate cycle (TCA cycle)	Carbohydrate metabolism	Metabolism	GO:0055086	biological_process	nucleobase-containing small molecule metabolic process
OG0001104	dihydrolipoyllysine-residue acetyltransferase	K00627	DLAT, aceF, pdhC; pyruvate dehydrogenase E2 component (dihydrolipoamide acetyltransferase)	[EC:2.3.1.12]	Citrate cycle (TCA cycle)	Carbohydrate metabolism	Metabolism	GO:0009135	biological_process	purine nucleoside diphosphate metabolic process
OG0001104	dihydrolipoyllysine-residue acetyltransferase	K00627	DLAT, aceF, pdhC; pyruvate dehydrogenase E2 component (dihydrolipoamide acetyltransferase)	[EC:2.3.1.12]	Citrate cycle (TCA cycle)	Carbohydrate metabolism	Metabolism	GO:0016052	biological_process	carbohydrate catabolic process
OG0001104	dihydrolipoyllysine-residue acetyltransferase	K00627	DLAT, aceF, pdhC; pyruvate dehydrogenase E2 component (dihydrolipoamide acetyltransferase)	[EC:2.3.1.12]	Citrate cycle (TCA cycle)	Carbohydrate metabolism	Metabolism	GO:0019637	biological_process	organophosphate metabolic process
OG0001104	dihydrolipoyllysine-residue acetyltransferase	K00627	DLAT, aceF, pdhC; pyruvate dehydrogenase E2 component (dihydrolipoamide acetyltransferase)	[EC:2.3.1.12]	Citrate cycle (TCA cycle)	Carbohydrate metabolism	Metabolism	GO:0009141	biological_process	nucleoside triphosphate metabolic process
OG0001104	dihydrolipoyllysine-residue acetyltransferase	K00627	DLAT, aceF, pdhC; pyruvate dehydrogenase E2 component (dihydrolipoamide acetyltransferase)	[EC:2.3.1.12]	Citrate cycle (TCA cycle)	Carbohydrate metabolism	Metabolism	GO:0016310	biological_process	phosphorylation
OG0001104	dihydrolipoyllysine-residue acetyltransferase	K00627	DLAT, aceF, pdhC; pyruvate dehydrogenase E2 component (dihydrolipoamide acetyltransferase)	[EC:2.3.1.12]	Citrate cycle (TCA cycle)	Carbohydrate metabolism	Metabolism	GO:0009144	biological_process	purine nucleoside triphosphate metabolic process
OG0001104	dihydrolipoyllysine-residue acetyltransferase	K00627	DLAT, aceF, pdhC; pyruvate dehydrogenase E2 component (dihydrolipoamide acetyltransferase)	[EC:2.3.1.12]	Citrate cycle (TCA cycle)	Carbohydrate metabolism	Metabolism	GO:0030523	molecular_function	dihydrolipoamide S-acyltransferase activity
OG0001104	dihydrolipoyllysine-residue acetyltransferase	K00627	DLAT, aceF, pdhC; pyruvate dehydrogenase E2 component (dihydrolipoamide acetyltransferase)	[EC:2.3.1.12]	Citrate cycle (TCA cycle)	Carbohydrate metabolism	Metabolism	GO:0009150	biological_process	purine ribonucleotide metabolic process
OG0001104	dihydrolipoyllysine-residue acetyltransferase	K00627	DLAT, aceF, pdhC; pyruvate dehydrogenase E2 component (dihydrolipoamide acetyltransferase)	[EC:2.3.1.12]	Citrate cycle (TCA cycle)	Carbohydrate metabolism	Metabolism	GO:0006082	biological_process	organic acid metabolic process
OG0001104	dihydrolipoyllysine-residue acetyltransferase	K00627	DLAT, aceF, pdhC; pyruvate dehydrogenase E2 component (dihydrolipoamide acetyltransferase)	[EC:2.3.1.12]	Citrate cycle (TCA cycle)	Carbohydrate metabolism	Metabolism	GO:0140096	molecular_function	catalytic activity, acting on a protein
OG0001104	dihydrolipoyllysine-residue acetyltransferase	K00627	DLAT, aceF, pdhC; pyruvate dehydrogenase E2 component (dihydrolipoamide acetyltransferase)	[EC:2.3.1.12]	Citrate cycle (TCA cycle)	Carbohydrate metabolism	Metabolism	GO:0006725	biological_process	cellular aromatic compound metabolic process
OG0001104	dihydrolipoyllysine-residue acetyltransferase	K00627	DLAT, aceF, pdhC; pyruvate dehydrogenase E2 component (dihydrolipoamide acetyltransferase)	[EC:2.3.1.12]	Citrate cycle (TCA cycle)	Carbohydrate metabolism	Metabolism	GO:0045254	cellular_component	pyruvate dehydrogenase complex
OG0001104	dihydrolipoyllysine-residue acetyltransferase	K00627	DLAT, aceF, pdhC; pyruvate dehydrogenase E2 component (dihydrolipoamide acetyltransferase)	[EC:2.3.1.12]	Citrate cycle (TCA cycle)	Carbohydrate metabolism	Metabolism	GO:0005575	cellular_component	cellular_component
OG0001104	dihydrolipoyllysine-residue acetyltransferase	K00627	DLAT, aceF, pdhC; pyruvate dehydrogenase E2 component (dihydrolipoamide acetyltransferase)	[EC:2.3.1.12]	Citrate cycle (TCA cycle)	Carbohydrate metabolism	Metabolism	GO:0072521	biological_process	purine-containing compound metabolic process
OG0001104	dihydrolipoyllysine-residue acetyltransferase	K00627	DLAT, aceF, pdhC; pyruvate dehydrogenase E2 component (dihydrolipoamide acetyltransferase)	[EC:2.3.1.12]	Citrate cycle (TCA cycle)	Carbohydrate metabolism	Metabolism	GO:0006090	biological_process	pyruvate metabolic process
OG0001104	dihydrolipoyllysine-residue acetyltransferase	K00627	DLAT, aceF, pdhC; pyruvate dehydrogenase E2 component (dihydrolipoamide acetyltransferase)	[EC:2.3.1.12]	Citrate cycle (TCA cycle)	Carbohydrate metabolism	Metabolism	GO:0006091	biological_process	generation of precursor metabolites and energy
OG0001104	dihydrolipoyllysine-residue acetyltransferase	K00627	DLAT, aceF, pdhC; pyruvate dehydrogenase E2 component (dihydrolipoamide acetyltransferase)	[EC:2.3.1.12]	Citrate cycle (TCA cycle)	Carbohydrate metabolism	Metabolism	GO:0044237	biological_process	cellular metabolic process
OG0001104	dihydrolipoyllysine-residue acetyltransferase	K00627	DLAT, aceF, pdhC; pyruvate dehydrogenase E2 component (dihydrolipoamide acetyltransferase)	[EC:2.3.1.12]	Citrate cycle (TCA cycle)	Carbohydrate metabolism	Metabolism	GO:0044238	biological_process	primary metabolic process
OG0001104	dihydrolipoyllysine-residue acetyltransferase	K00627	DLAT, aceF, pdhC; pyruvate dehydrogenase E2 component (dihydrolipoamide acetyltransferase)	[EC:2.3.1.12]	Citrate cycle (TCA cycle)	Carbohydrate metabolism	Metabolism	GO:0046031	biological_process	ADP metabolic process
OG0001104	dihydrolipoyllysine-residue acetyltransferase	K00627	DLAT, aceF, pdhC; pyruvate dehydrogenase E2 component (dihydrolipoamide acetyltransferase)	[EC:2.3.1.12]	Citrate cycle (TCA cycle)	Carbohydrate metabolism	Metabolism	GO:0006096	biological_process	glycolytic process
OG0001104	dihydrolipoyllysine-residue acetyltransferase	K00627	DLAT, aceF, pdhC; pyruvate dehydrogenase E2 component (dihydrolipoamide acetyltransferase)	[EC:2.3.1.12]	Citrate cycle (TCA cycle)	Carbohydrate metabolism	Metabolism	GO:0034641	biological_process	cellular nitrogen compound metabolic process
OG0001104	dihydrolipoyllysine-residue acetyltransferase	K00627	DLAT, aceF, pdhC; pyruvate dehydrogenase E2 component (dihydrolipoamide acetyltransferase)	[EC:2.3.1.12]	Citrate cycle (TCA cycle)	Carbohydrate metabolism	Metabolism	GO:1901135	biological_process	carbohydrate derivative metabolic process
OG0001104	dihydrolipoyllysine-residue acetyltransferase	K00627	DLAT, aceF, pdhC; pyruvate dehydrogenase E2 component (dihydrolipoamide acetyltransferase)	[EC:2.3.1.12]	Citrate cycle (TCA cycle)	Carbohydrate metabolism	Metabolism	GO:0046034	biological_process	ATP metabolic process
OG0001104	dihydrolipoyllysine-residue acetyltransferase	K00627	DLAT, aceF, pdhC; pyruvate dehydrogenase E2 component (dihydrolipoamide acetyltransferase)	[EC:2.3.1.12]	Citrate cycle (TCA cycle)	Carbohydrate metabolism	Metabolism	GO:0110165	cellular_component	cellular anatomical entity
OG0001104	dihydrolipoyllysine-residue acetyltransferase	K00627	DLAT, aceF, pdhC; pyruvate dehydrogenase E2 component (dihydrolipoamide acetyltransferase)	[EC:2.3.1.12]	Citrate cycle (TCA cycle)	Carbohydrate metabolism	Metabolism	GO:0008150	biological_process	biological_process
OG0001104	dihydrolipoyllysine-residue acetyltransferase	K00627	DLAT, aceF, pdhC; pyruvate dehydrogenase E2 component (dihydrolipoamide acetyltransferase)	[EC:2.3.1.12]	Citrate cycle (TCA cycle)	Carbohydrate metabolism	Metabolism	GO:0005975	biological_process	carbohydrate metabolic process
OG0001104	dihydrolipoyllysine-residue acetyltransferase	K00627	DLAT, aceF, pdhC; pyruvate dehydrogenase E2 component (dihydrolipoamide acetyltransferase)	[EC:2.3.1.12]	Citrate cycle (TCA cycle)	Carbohydrate metabolism	Metabolism	GO:0008152	biological_process	metabolic process
OG0001104	dihydrolipoyllysine-residue acetyltransferase	K00627	DLAT, aceF, pdhC; pyruvate dehydrogenase E2 component (dihydrolipoamide acetyltransferase)	[EC:2.3.1.12]	Citrate cycle (TCA cycle)	Carbohydrate metabolism	Metabolism	GO:0003674	molecular_function	molecular_function
OG0001104	dihydrolipoyllysine-residue acetyltransferase	K00627	DLAT, aceF, pdhC; pyruvate dehydrogenase E2 component (dihydrolipoamide acetyltransferase)	[EC:2.3.1.12]	Citrate cycle (TCA cycle)	Carbohydrate metabolism	Metabolism	GO:0046939	biological_process	nucleotide phosphorylation
OG0001104	dihydrolipoyllysine-residue acetyltransferase	K00627	DLAT, aceF, pdhC; pyruvate dehydrogenase E2 component (dihydrolipoamide acetyltransferase)	[EC:2.3.1.12]	Citrate cycle (TCA cycle)	Carbohydrate metabolism	Metabolism	GO:0009179	biological_process	purine ribonucleoside diphosphate metabolic process
OG0001104	dihydrolipoyllysine-residue acetyltransferase	K00627	DLAT, aceF, pdhC; pyruvate dehydrogenase E2 component (dihydrolipoamide acetyltransferase)	[EC:2.3.1.12]	Citrate cycle (TCA cycle)	Carbohydrate metabolism	Metabolism	GO:0032991	cellular_component	protein-containing complex
OG0001104	dihydrolipoyllysine-residue acetyltransferase	K00627	DLAT, aceF, pdhC; pyruvate dehydrogenase E2 component (dihydrolipoamide acetyltransferase)	[EC:2.3.1.12]	Citrate cycle (TCA cycle)	Carbohydrate metabolism	Metabolism	GO:0009056	biological_process	catabolic process
OG0001104	dihydrolipoyllysine-residue acetyltransferase	K00627	DLAT, aceF, pdhC; pyruvate dehydrogenase E2 component (dihydrolipoamide acetyltransferase)	[EC:2.3.1.12]	Citrate cycle (TCA cycle)	Carbohydrate metabolism	Metabolism	GO:0006753	biological_process	nucleoside phosphate metabolic process
OG0001104	dihydrolipoyllysine-residue acetyltransferase	K00627	DLAT, aceF, pdhC; pyruvate dehydrogenase E2 component (dihydrolipoamide acetyltransferase)	[EC:2.3.1.12]	Citrate cycle (TCA cycle)	Carbohydrate metabolism	Metabolism	GO:1901564	biological_process	organonitrogen compound metabolic process
OG0001104	dihydrolipoyllysine-residue acetyltransferase	K00627	DLAT, aceF, pdhC; pyruvate dehydrogenase E2 component (dihydrolipoamide acetyltransferase)	[EC:2.3.1.12]	Citrate cycle (TCA cycle)	Carbohydrate metabolism	Metabolism	GO:0009185	biological_process	ribonucleoside diphosphate metabolic process
OG0001104	dihydrolipoyllysine-residue acetyltransferase	K00627	DLAT, aceF, pdhC; pyruvate dehydrogenase E2 component (dihydrolipoamide acetyltransferase)	[EC:2.3.1.12]	Citrate cycle (TCA cycle)	Carbohydrate metabolism	Metabolism	GO:0016740	molecular_function	transferase activity
OG0001104	dihydrolipoyllysine-residue acetyltransferase	K00627	DLAT, aceF, pdhC; pyruvate dehydrogenase E2 component (dihydrolipoamide acetyltransferase)	[EC:2.3.1.12]	Citrate cycle (TCA cycle)	Carbohydrate metabolism	Metabolism	GO:0006757	biological_process	ATP generation from ADP
OG0001104	dihydrolipoyllysine-residue acetyltransferase	K00627	DLAT, aceF, pdhC; pyruvate dehydrogenase E2 component (dihydrolipoamide acetyltransferase)	[EC:2.3.1.12]	Citrate cycle (TCA cycle)	Carbohydrate metabolism	Metabolism	GO:0005737	cellular_component	cytoplasm
OG0001104	dihydrolipoyllysine-residue acetyltransferase	K00627	DLAT, aceF, pdhC; pyruvate dehydrogenase E2 component (dihydrolipoamide acetyltransferase)	[EC:2.3.1.12]	Citrate cycle (TCA cycle)	Carbohydrate metabolism	Metabolism	GO:0016746	molecular_function	acyltransferase activity
OG0001104	dihydrolipoyllysine-residue acetyltransferase	K00627	DLAT, aceF, pdhC; pyruvate dehydrogenase E2 component (dihydrolipoamide acetyltransferase)	[EC:2.3.1.12]	Citrate cycle (TCA cycle)	Carbohydrate metabolism	Metabolism	GO:0016747	molecular_function	acyltransferase activity, transferring groups other than amino-acyl groups
OG0001104	dihydrolipoyllysine-residue acetyltransferase	K00627	DLAT, aceF, pdhC; pyruvate dehydrogenase E2 component (dihydrolipoamide acetyltransferase)	[EC:2.3.1.12]	Citrate cycle (TCA cycle)	Carbohydrate metabolism	Metabolism	GO:0019693	biological_process	ribose phosphate metabolic process
OG0001104	dihydrolipoyllysine-residue acetyltransferase	K00627	DLAT, aceF, pdhC; pyruvate dehydrogenase E2 component (dihydrolipoamide acetyltransferase)	[EC:2.3.1.12]	Citrate cycle (TCA cycle)	Carbohydrate metabolism	Metabolism	GO:0009199	biological_process	ribonucleoside triphosphate metabolic process
OG0001104	dihydrolipoyllysine-residue acetyltransferase	K00627	DLAT, aceF, pdhC; pyruvate dehydrogenase E2 component (dihydrolipoamide acetyltransferase)	[EC:2.3.1.12]	Citrate cycle (TCA cycle)	Carbohydrate metabolism	Metabolism	GO:0003824	molecular_function	catalytic activity
OG0001104	dihydrolipoyllysine-residue acetyltransferase	K00627	DLAT, aceF, pdhC; pyruvate dehydrogenase E2 component (dihydrolipoamide acetyltransferase)	[EC:2.3.1.12]	Citrate cycle (TCA cycle)	Carbohydrate metabolism	Metabolism	GO:0009205	biological_process	purine ribonucleoside triphosphate metabolic process
OG0001104	dihydrolipoyllysine-residue acetyltransferase	K00627	DLAT, aceF, pdhC; pyruvate dehydrogenase E2 component (dihydrolipoamide acetyltransferase)	[EC:2.3.1.12]	Citrate cycle (TCA cycle)	Carbohydrate metabolism	Metabolism	GO:0005622	cellular_component	intracellular anatomical structure
OG0001104	dihydrolipoyllysine-residue acetyltransferase	K00627	DLAT, aceF, pdhC; pyruvate dehydrogenase E2 component (dihydrolipoamide acetyltransferase)	[EC:2.3.1.12]	Citrate cycle (TCA cycle)	Carbohydrate metabolism	Metabolism	GO:0044281	biological_process	small molecule metabolic process
OG0001104	dihydrolipoyllysine-residue acetyltransferase	K00627	DLAT, aceF, pdhC; pyruvate dehydrogenase E2 component (dihydrolipoamide acetyltransferase)	[EC:2.3.1.12]	Citrate cycle (TCA cycle)	Carbohydrate metabolism	Metabolism	GO:0006139	biological_process	nucleobase-containing compound metabolic process
OG0001104	dihydrolipoyllysine-residue acetyltransferase	K00627	DLAT, aceF, pdhC; pyruvate dehydrogenase E2 component (dihydrolipoamide acetyltransferase)	[EC:2.3.1.12]	Pyruvate metabolism	Carbohydrate metabolism	Metabolism	GO:0009987	biological_process	cellular process
OG0001104	dihydrolipoyllysine-residue acetyltransferase	K00627	DLAT, aceF, pdhC; pyruvate dehydrogenase E2 component (dihydrolipoamide acetyltransferase)	[EC:2.3.1.12]	Pyruvate metabolism	Carbohydrate metabolism	Metabolism	GO:1902494	cellular_component	catalytic complex
OG0001104	dihydrolipoyllysine-residue acetyltransferase	K00627	DLAT, aceF, pdhC; pyruvate dehydrogenase E2 component (dihydrolipoamide acetyltransferase)	[EC:2.3.1.12]	Pyruvate metabolism	Carbohydrate metabolism	Metabolism	GO:0004742	molecular_function	dihydrolipoyllysine-residue acetyltransferase activity
OG0001104	dihydrolipoyllysine-residue acetyltransferase	K00627	DLAT, aceF, pdhC; pyruvate dehydrogenase E2 component (dihydrolipoamide acetyltransferase)	[EC:2.3.1.12]	Pyruvate metabolism	Carbohydrate metabolism	Metabolism	GO:0006793	biological_process	phosphorus metabolic process
OG0001104	dihydrolipoyllysine-residue acetyltransferase	K00627	DLAT, aceF, pdhC; pyruvate dehydrogenase E2 component (dihydrolipoamide acetyltransferase)	[EC:2.3.1.12]	Pyruvate metabolism	Carbohydrate metabolism	Metabolism	GO:0006796	biological_process	phosphate-containing compound metabolic process
OG0001104	dihydrolipoyllysine-residue acetyltransferase	K00627	DLAT, aceF, pdhC; pyruvate dehydrogenase E2 component (dihydrolipoamide acetyltransferase)	[EC:2.3.1.12]	Pyruvate metabolism	Carbohydrate metabolism	Metabolism	GO:0032787	biological_process	monocarboxylic acid metabolic process
OG0001104	dihydrolipoyllysine-residue acetyltransferase	K00627	DLAT, aceF, pdhC; pyruvate dehydrogenase E2 component (dihydrolipoamide acetyltransferase)	[EC:2.3.1.12]	Pyruvate metabolism	Carbohydrate metabolism	Metabolism	GO:0046483	biological_process	heterocycle metabolic process
OG0001104	dihydrolipoyllysine-residue acetyltransferase	K00627	DLAT, aceF, pdhC; pyruvate dehydrogenase E2 component (dihydrolipoamide acetyltransferase)	[EC:2.3.1.12]	Pyruvate metabolism	Carbohydrate metabolism	Metabolism	GO:0006163	biological_process	purine nucleotide metabolic process
OG0001104	dihydrolipoyllysine-residue acetyltransferase	K00627	DLAT, aceF, pdhC; pyruvate dehydrogenase E2 component (dihydrolipoamide acetyltransferase)	[EC:2.3.1.12]	Pyruvate metabolism	Carbohydrate metabolism	Metabolism	GO:0006165	biological_process	nucleoside diphosphate phosphorylation
OG0001104	dihydrolipoyllysine-residue acetyltransferase	K00627	DLAT, aceF, pdhC; pyruvate dehydrogenase E2 component (dihydrolipoamide acetyltransferase)	[EC:2.3.1.12]	Pyruvate metabolism	Carbohydrate metabolism	Metabolism	GO:0006807	biological_process	nitrogen compound metabolic process
OG0001104	dihydrolipoyllysine-residue acetyltransferase	K00627	DLAT, aceF, pdhC; pyruvate dehydrogenase E2 component (dihydrolipoamide acetyltransferase)	[EC:2.3.1.12]	Pyruvate metabolism	Carbohydrate metabolism	Metabolism	GO:0016407	molecular_function	acetyltransferase activity
OG0001104	dihydrolipoyllysine-residue acetyltransferase	K00627	DLAT, aceF, pdhC; pyruvate dehydrogenase E2 component (dihydrolipoamide acetyltransferase)	[EC:2.3.1.12]	Pyruvate metabolism	Carbohydrate metabolism	Metabolism	GO:0071704	biological_process	organic substance metabolic process
OG0001104	dihydrolipoyllysine-residue acetyltransferase	K00627	DLAT, aceF, pdhC; pyruvate dehydrogenase E2 component (dihydrolipoamide acetyltransferase)	[EC:2.3.1.12]	Pyruvate metabolism	Carbohydrate metabolism	Metabolism	GO:1901575	biological_process	organic substance catabolic process
OG0001104	dihydrolipoyllysine-residue acetyltransferase	K00627	DLAT, aceF, pdhC; pyruvate dehydrogenase E2 component (dihydrolipoamide acetyltransferase)	[EC:2.3.1.12]	Pyruvate metabolism	Carbohydrate metabolism	Metabolism	GO:0009117	biological_process	nucleotide metabolic process
OG0001104	dihydrolipoyllysine-residue acetyltransferase	K00627	DLAT, aceF, pdhC; pyruvate dehydrogenase E2 component (dihydrolipoamide acetyltransferase)	[EC:2.3.1.12]	Pyruvate metabolism	Carbohydrate metabolism	Metabolism	GO:0016417	molecular_function	S-acyltransferase activity
OG0001104	dihydrolipoyllysine-residue acetyltransferase	K00627	DLAT, aceF, pdhC; pyruvate dehydrogenase E2 component (dihydrolipoamide acetyltransferase)	[EC:2.3.1.12]	Pyruvate metabolism	Carbohydrate metabolism	Metabolism	GO:1990204	cellular_component	oxidoreductase complex
OG0001104	dihydrolipoyllysine-residue acetyltransferase	K00627	DLAT, aceF, pdhC; pyruvate dehydrogenase E2 component (dihydrolipoamide acetyltransferase)	[EC:2.3.1.12]	Pyruvate metabolism	Carbohydrate metabolism	Metabolism	GO:0016418	molecular_function	S-acetyltransferase activity
OG0001104	dihydrolipoyllysine-residue acetyltransferase	K00627	DLAT, aceF, pdhC; pyruvate dehydrogenase E2 component (dihydrolipoamide acetyltransferase)	[EC:2.3.1.12]	Pyruvate metabolism	Carbohydrate metabolism	Metabolism	GO:0019752	biological_process	carboxylic acid metabolic process
OG0001104	dihydrolipoyllysine-residue acetyltransferase	K00627	DLAT, aceF, pdhC; pyruvate dehydrogenase E2 component (dihydrolipoamide acetyltransferase)	[EC:2.3.1.12]	Pyruvate metabolism	Carbohydrate metabolism	Metabolism	GO:0009259	biological_process	ribonucleotide metabolic process
OG0001104	dihydrolipoyllysine-residue acetyltransferase	K00627	DLAT, aceF, pdhC; pyruvate dehydrogenase E2 component (dihydrolipoamide acetyltransferase)	[EC:2.3.1.12]	Pyruvate metabolism	Carbohydrate metabolism	Metabolism	GO:0043436	biological_process	oxoacid metabolic process
OG0001104	dihydrolipoyllysine-residue acetyltransferase	K00627	DLAT, aceF, pdhC; pyruvate dehydrogenase E2 component (dihydrolipoamide acetyltransferase)	[EC:2.3.1.12]	Pyruvate metabolism	Carbohydrate metabolism	Metabolism	GO:0009132	biological_process	nucleoside diphosphate metabolic process
OG0001104	dihydrolipoyllysine-residue acetyltransferase	K00627	DLAT, aceF, pdhC; pyruvate dehydrogenase E2 component (dihydrolipoamide acetyltransferase)	[EC:2.3.1.12]	Pyruvate metabolism	Carbohydrate metabolism	Metabolism	GO:1901360	biological_process	organic cyclic compound metabolic process
OG0001104	dihydrolipoyllysine-residue acetyltransferase	K00627	DLAT, aceF, pdhC; pyruvate dehydrogenase E2 component (dihydrolipoamide acetyltransferase)	[EC:2.3.1.12]	Pyruvate metabolism	Carbohydrate metabolism	Metabolism	GO:0055086	biological_process	nucleobase-containing small molecule metabolic process
OG0001104	dihydrolipoyllysine-residue acetyltransferase	K00627	DLAT, aceF, pdhC; pyruvate dehydrogenase E2 component (dihydrolipoamide acetyltransferase)	[EC:2.3.1.12]	Pyruvate metabolism	Carbohydrate metabolism	Metabolism	GO:0009135	biological_process	purine nucleoside diphosphate metabolic process
OG0001104	dihydrolipoyllysine-residue acetyltransferase	K00627	DLAT, aceF, pdhC; pyruvate dehydrogenase E2 component (dihydrolipoamide acetyltransferase)	[EC:2.3.1.12]	Pyruvate metabolism	Carbohydrate metabolism	Metabolism	GO:0016052	biological_process	carbohydrate catabolic process
OG0001104	dihydrolipoyllysine-residue acetyltransferase	K00627	DLAT, aceF, pdhC; pyruvate dehydrogenase E2 component (dihydrolipoamide acetyltransferase)	[EC:2.3.1.12]	Pyruvate metabolism	Carbohydrate metabolism	Metabolism	GO:0019637	biological_process	organophosphate metabolic process
OG0001104	dihydrolipoyllysine-residue acetyltransferase	K00627	DLAT, aceF, pdhC; pyruvate dehydrogenase E2 component (dihydrolipoamide acetyltransferase)	[EC:2.3.1.12]	Pyruvate metabolism	Carbohydrate metabolism	Metabolism	GO:0009141	biological_process	nucleoside triphosphate metabolic process
OG0001104	dihydrolipoyllysine-residue acetyltransferase	K00627	DLAT, aceF, pdhC; pyruvate dehydrogenase E2 component (dihydrolipoamide acetyltransferase)	[EC:2.3.1.12]	Pyruvate metabolism	Carbohydrate metabolism	Metabolism	GO:0016310	biological_process	phosphorylation
OG0001104	dihydrolipoyllysine-residue acetyltransferase	K00627	DLAT, aceF, pdhC; pyruvate dehydrogenase E2 component (dihydrolipoamide acetyltransferase)	[EC:2.3.1.12]	Pyruvate metabolism	Carbohydrate metabolism	Metabolism	GO:0009144	biological_process	purine nucleoside triphosphate metabolic process
OG0001104	dihydrolipoyllysine-residue acetyltransferase	K00627	DLAT, aceF, pdhC; pyruvate dehydrogenase E2 component (dihydrolipoamide acetyltransferase)	[EC:2.3.1.12]	Pyruvate metabolism	Carbohydrate metabolism	Metabolism	GO:0030523	molecular_function	dihydrolipoamide S-acyltransferase activity
OG0001104	dihydrolipoyllysine-residue acetyltransferase	K00627	DLAT, aceF, pdhC; pyruvate dehydrogenase E2 component (dihydrolipoamide acetyltransferase)	[EC:2.3.1.12]	Pyruvate metabolism	Carbohydrate metabolism	Metabolism	GO:0009150	biological_process	purine ribonucleotide metabolic process
OG0001104	dihydrolipoyllysine-residue acetyltransferase	K00627	DLAT, aceF, pdhC; pyruvate dehydrogenase E2 component (dihydrolipoamide acetyltransferase)	[EC:2.3.1.12]	Pyruvate metabolism	Carbohydrate metabolism	Metabolism	GO:0006082	biological_process	organic acid metabolic process
OG0001104	dihydrolipoyllysine-residue acetyltransferase	K00627	DLAT, aceF, pdhC; pyruvate dehydrogenase E2 component (dihydrolipoamide acetyltransferase)	[EC:2.3.1.12]	Pyruvate metabolism	Carbohydrate metabolism	Metabolism	GO:0140096	molecular_function	catalytic activity, acting on a protein
OG0001104	dihydrolipoyllysine-residue acetyltransferase	K00627	DLAT, aceF, pdhC; pyruvate dehydrogenase E2 component (dihydrolipoamide acetyltransferase)	[EC:2.3.1.12]	Pyruvate metabolism	Carbohydrate metabolism	Metabolism	GO:0006725	biological_process	cellular aromatic compound metabolic process
OG0001104	dihydrolipoyllysine-residue acetyltransferase	K00627	DLAT, aceF, pdhC; pyruvate dehydrogenase E2 component (dihydrolipoamide acetyltransferase)	[EC:2.3.1.12]	Pyruvate metabolism	Carbohydrate metabolism	Metabolism	GO:0045254	cellular_component	pyruvate dehydrogenase complex
OG0001104	dihydrolipoyllysine-residue acetyltransferase	K00627	DLAT, aceF, pdhC; pyruvate dehydrogenase E2 component (dihydrolipoamide acetyltransferase)	[EC:2.3.1.12]	Pyruvate metabolism	Carbohydrate metabolism	Metabolism	GO:0005575	cellular_component	cellular_component
OG0001104	dihydrolipoyllysine-residue acetyltransferase	K00627	DLAT, aceF, pdhC; pyruvate dehydrogenase E2 component (dihydrolipoamide acetyltransferase)	[EC:2.3.1.12]	Pyruvate metabolism	Carbohydrate metabolism	Metabolism	GO:0072521	biological_process	purine-containing compound metabolic process
OG0001104	dihydrolipoyllysine-residue acetyltransferase	K00627	DLAT, aceF, pdhC; pyruvate dehydrogenase E2 component (dihydrolipoamide acetyltransferase)	[EC:2.3.1.12]	Pyruvate metabolism	Carbohydrate metabolism	Metabolism	GO:0006090	biological_process	pyruvate metabolic process
OG0001104	dihydrolipoyllysine-residue acetyltransferase	K00627	DLAT, aceF, pdhC; pyruvate dehydrogenase E2 component (dihydrolipoamide acetyltransferase)	[EC:2.3.1.12]	Pyruvate metabolism	Carbohydrate metabolism	Metabolism	GO:0006091	biological_process	generation of precursor metabolites and energy
OG0001104	dihydrolipoyllysine-residue acetyltransferase	K00627	DLAT, aceF, pdhC; pyruvate dehydrogenase E2 component (dihydrolipoamide acetyltransferase)	[EC:2.3.1.12]	Pyruvate metabolism	Carbohydrate metabolism	Metabolism	GO:0044237	biological_process	cellular metabolic process
OG0001104	dihydrolipoyllysine-residue acetyltransferase	K00627	DLAT, aceF, pdhC; pyruvate dehydrogenase E2 component (dihydrolipoamide acetyltransferase)	[EC:2.3.1.12]	Pyruvate metabolism	Carbohydrate metabolism	Metabolism	GO:0044238	biological_process	primary metabolic process
OG0001104	dihydrolipoyllysine-residue acetyltransferase	K00627	DLAT, aceF, pdhC; pyruvate dehydrogenase E2 component (dihydrolipoamide acetyltransferase)	[EC:2.3.1.12]	Pyruvate metabolism	Carbohydrate metabolism	Metabolism	GO:0046031	biological_process	ADP metabolic process
OG0001104	dihydrolipoyllysine-residue acetyltransferase	K00627	DLAT, aceF, pdhC; pyruvate dehydrogenase E2 component (dihydrolipoamide acetyltransferase)	[EC:2.3.1.12]	Pyruvate metabolism	Carbohydrate metabolism	Metabolism	GO:0006096	biological_process	glycolytic process
OG0001104	dihydrolipoyllysine-residue acetyltransferase	K00627	DLAT, aceF, pdhC; pyruvate dehydrogenase E2 component (dihydrolipoamide acetyltransferase)	[EC:2.3.1.12]	Pyruvate metabolism	Carbohydrate metabolism	Metabolism	GO:0034641	biological_process	cellular nitrogen compound metabolic process
OG0001104	dihydrolipoyllysine-residue acetyltransferase	K00627	DLAT, aceF, pdhC; pyruvate dehydrogenase E2 component (dihydrolipoamide acetyltransferase)	[EC:2.3.1.12]	Pyruvate metabolism	Carbohydrate metabolism	Metabolism	GO:1901135	biological_process	carbohydrate derivative metabolic process
OG0001104	dihydrolipoyllysine-residue acetyltransferase	K00627	DLAT, aceF, pdhC; pyruvate dehydrogenase E2 component (dihydrolipoamide acetyltransferase)	[EC:2.3.1.12]	Pyruvate metabolism	Carbohydrate metabolism	Metabolism	GO:0046034	biological_process	ATP metabolic process
OG0001104	dihydrolipoyllysine-residue acetyltransferase	K00627	DLAT, aceF, pdhC; pyruvate dehydrogenase E2 component (dihydrolipoamide acetyltransferase)	[EC:2.3.1.12]	Pyruvate metabolism	Carbohydrate metabolism	Metabolism	GO:0110165	cellular_component	cellular anatomical entity
OG0001104	dihydrolipoyllysine-residue acetyltransferase	K00627	DLAT, aceF, pdhC; pyruvate dehydrogenase E2 component (dihydrolipoamide acetyltransferase)	[EC:2.3.1.12]	Pyruvate metabolism	Carbohydrate metabolism	Metabolism	GO:0008150	biological_process	biological_process
OG0001104	dihydrolipoyllysine-residue acetyltransferase	K00627	DLAT, aceF, pdhC; pyruvate dehydrogenase E2 component (dihydrolipoamide acetyltransferase)	[EC:2.3.1.12]	Pyruvate metabolism	Carbohydrate metabolism	Metabolism	GO:0005975	biological_process	carbohydrate metabolic process
OG0001104	dihydrolipoyllysine-residue acetyltransferase	K00627	DLAT, aceF, pdhC; pyruvate dehydrogenase E2 component (dihydrolipoamide acetyltransferase)	[EC:2.3.1.12]	Pyruvate metabolism	Carbohydrate metabolism	Metabolism	GO:0008152	biological_process	metabolic process
OG0001104	dihydrolipoyllysine-residue acetyltransferase	K00627	DLAT, aceF, pdhC; pyruvate dehydrogenase E2 component (dihydrolipoamide acetyltransferase)	[EC:2.3.1.12]	Pyruvate metabolism	Carbohydrate metabolism	Metabolism	GO:0003674	molecular_function	molecular_function
OG0001104	dihydrolipoyllysine-residue acetyltransferase	K00627	DLAT, aceF, pdhC; pyruvate dehydrogenase E2 component (dihydrolipoamide acetyltransferase)	[EC:2.3.1.12]	Pyruvate metabolism	Carbohydrate metabolism	Metabolism	GO:0046939	biological_process	nucleotide phosphorylation
OG0001104	dihydrolipoyllysine-residue acetyltransferase	K00627	DLAT, aceF, pdhC; pyruvate dehydrogenase E2 component (dihydrolipoamide acetyltransferase)	[EC:2.3.1.12]	Pyruvate metabolism	Carbohydrate metabolism	Metabolism	GO:0009179	biological_process	purine ribonucleoside diphosphate metabolic process
OG0001104	dihydrolipoyllysine-residue acetyltransferase	K00627	DLAT, aceF, pdhC; pyruvate dehydrogenase E2 component (dihydrolipoamide acetyltransferase)	[EC:2.3.1.12]	Pyruvate metabolism	Carbohydrate metabolism	Metabolism	GO:0032991	cellular_component	protein-containing complex
OG0001104	dihydrolipoyllysine-residue acetyltransferase	K00627	DLAT, aceF, pdhC; pyruvate dehydrogenase E2 component (dihydrolipoamide acetyltransferase)	[EC:2.3.1.12]	Pyruvate metabolism	Carbohydrate metabolism	Metabolism	GO:0009056	biological_process	catabolic process
OG0001104	dihydrolipoyllysine-residue acetyltransferase	K00627	DLAT, aceF, pdhC; pyruvate dehydrogenase E2 component (dihydrolipoamide acetyltransferase)	[EC:2.3.1.12]	Pyruvate metabolism	Carbohydrate metabolism	Metabolism	GO:0006753	biological_process	nucleoside phosphate metabolic process
OG0001104	dihydrolipoyllysine-residue acetyltransferase	K00627	DLAT, aceF, pdhC; pyruvate dehydrogenase E2 component (dihydrolipoamide acetyltransferase)	[EC:2.3.1.12]	Pyruvate metabolism	Carbohydrate metabolism	Metabolism	GO:1901564	biological_process	organonitrogen compound metabolic process
OG0001104	dihydrolipoyllysine-residue acetyltransferase	K00627	DLAT, aceF, pdhC; pyruvate dehydrogenase E2 component (dihydrolipoamide acetyltransferase)	[EC:2.3.1.12]	Pyruvate metabolism	Carbohydrate metabolism	Metabolism	GO:0009185	biological_process	ribonucleoside diphosphate metabolic process
OG0001104	dihydrolipoyllysine-residue acetyltransferase	K00627	DLAT, aceF, pdhC; pyruvate dehydrogenase E2 component (dihydrolipoamide acetyltransferase)	[EC:2.3.1.12]	Pyruvate metabolism	Carbohydrate metabolism	Metabolism	GO:0016740	molecular_function	transferase activity
OG0001104	dihydrolipoyllysine-residue acetyltransferase	K00627	DLAT, aceF, pdhC; pyruvate dehydrogenase E2 component (dihydrolipoamide acetyltransferase)	[EC:2.3.1.12]	Pyruvate metabolism	Carbohydrate metabolism	Metabolism	GO:0006757	biological_process	ATP generation from ADP
OG0001104	dihydrolipoyllysine-residue acetyltransferase	K00627	DLAT, aceF, pdhC; pyruvate dehydrogenase E2 component (dihydrolipoamide acetyltransferase)	[EC:2.3.1.12]	Pyruvate metabolism	Carbohydrate metabolism	Metabolism	GO:0005737	cellular_component	cytoplasm
OG0001104	dihydrolipoyllysine-residue acetyltransferase	K00627	DLAT, aceF, pdhC; pyruvate dehydrogenase E2 component (dihydrolipoamide acetyltransferase)	[EC:2.3.1.12]	Pyruvate metabolism	Carbohydrate metabolism	Metabolism	GO:0016746	molecular_function	acyltransferase activity
OG0001104	dihydrolipoyllysine-residue acetyltransferase	K00627	DLAT, aceF, pdhC; pyruvate dehydrogenase E2 component (dihydrolipoamide acetyltransferase)	[EC:2.3.1.12]	Pyruvate metabolism	Carbohydrate metabolism	Metabolism	GO:0016747	molecular_function	acyltransferase activity, transferring groups other than amino-acyl groups
OG0001104	dihydrolipoyllysine-residue acetyltransferase	K00627	DLAT, aceF, pdhC; pyruvate dehydrogenase E2 component (dihydrolipoamide acetyltransferase)	[EC:2.3.1.12]	Pyruvate metabolism	Carbohydrate metabolism	Metabolism	GO:0019693	biological_process	ribose phosphate metabolic process
OG0001104	dihydrolipoyllysine-residue acetyltransferase	K00627	DLAT, aceF, pdhC; pyruvate dehydrogenase E2 component (dihydrolipoamide acetyltransferase)	[EC:2.3.1.12]	Pyruvate metabolism	Carbohydrate metabolism	Metabolism	GO:0009199	biological_process	ribonucleoside triphosphate metabolic process
OG0001104	dihydrolipoyllysine-residue acetyltransferase	K00627	DLAT, aceF, pdhC; pyruvate dehydrogenase E2 component (dihydrolipoamide acetyltransferase)	[EC:2.3.1.12]	Pyruvate metabolism	Carbohydrate metabolism	Metabolism	GO:0003824	molecular_function	catalytic activity
OG0001104	dihydrolipoyllysine-residue acetyltransferase	K00627	DLAT, aceF, pdhC; pyruvate dehydrogenase E2 component (dihydrolipoamide acetyltransferase)	[EC:2.3.1.12]	Pyruvate metabolism	Carbohydrate metabolism	Metabolism	GO:0009205	biological_process	purine ribonucleoside triphosphate metabolic process
OG0001104	dihydrolipoyllysine-residue acetyltransferase	K00627	DLAT, aceF, pdhC; pyruvate dehydrogenase E2 component (dihydrolipoamide acetyltransferase)	[EC:2.3.1.12]	Pyruvate metabolism	Carbohydrate metabolism	Metabolism	GO:0005622	cellular_component	intracellular anatomical structure
OG0001104	dihydrolipoyllysine-residue acetyltransferase	K00627	DLAT, aceF, pdhC; pyruvate dehydrogenase E2 component (dihydrolipoamide acetyltransferase)	[EC:2.3.1.12]	Pyruvate metabolism	Carbohydrate metabolism	Metabolism	GO:0044281	biological_process	small molecule metabolic process
OG0001104	dihydrolipoyllysine-residue acetyltransferase	K00627	DLAT, aceF, pdhC; pyruvate dehydrogenase E2 component (dihydrolipoamide acetyltransferase)	[EC:2.3.1.12]	Pyruvate metabolism	Carbohydrate metabolism	Metabolism	GO:0006139	biological_process	nucleobase-containing compound metabolic process
OG0001114	TetR/AcrR family transcriptional regulator							GO:0005488	molecular_function	binding
OG0001114	TetR/AcrR family transcriptional regulator							GO:0097159	molecular_function	organic cyclic compound binding
OG0001114	TetR/AcrR family transcriptional regulator							GO:0003674	molecular_function	molecular_function
OG0001114	TetR/AcrR family transcriptional regulator							GO:0003676	molecular_function	nucleic acid binding
OG0001114	TetR/AcrR family transcriptional regulator							GO:0003677	molecular_function	DNA binding
OG0001114	TetR/AcrR family transcriptional regulator							GO:1901363	molecular_function	heterocyclic compound binding
OG0001141	VC_2705 family sodium/solute symporter							GO:0051234	biological_process	establishment of localization
OG0001141	VC_2705 family sodium/solute symporter							GO:0009987	biological_process	cellular process
OG0001141	VC_2705 family sodium/solute symporter							GO:0005575	cellular_component	cellular_component
OG0001141	VC_2705 family sodium/solute symporter							GO:0022857	molecular_function	transmembrane transporter activity
OG0001141	VC_2705 family sodium/solute symporter							GO:0051179	biological_process	localization
OG0001141	VC_2705 family sodium/solute symporter							GO:0055085	biological_process	transmembrane transport
OG0001141	VC_2705 family sodium/solute symporter							GO:0016020	cellular_component	membrane
OG0001141	VC_2705 family sodium/solute symporter							GO:0110165	cellular_component	cellular anatomical entity
OG0001141	VC_2705 family sodium/solute symporter							GO:0016021	cellular_component	integral component of membrane
OG0001141	VC_2705 family sodium/solute symporter							GO:0008150	biological_process	biological_process
OG0001141	VC_2705 family sodium/solute symporter							GO:0031224	cellular_component	intrinsic component of membrane
OG0001141	VC_2705 family sodium/solute symporter							GO:0003674	molecular_function	molecular_function
OG0001141	VC_2705 family sodium/solute symporter							GO:0006810	biological_process	transport
OG0001141	VC_2705 family sodium/solute symporter							GO:0005215	molecular_function	transporter activity
OG0001161	response regulator transcription factor							GO:0009987	biological_process	cellular process
OG0001161	response regulator transcription factor							GO:0051716	biological_process	cellular response to stimulus
OG0001161	response regulator transcription factor							GO:0032774	biological_process	RNA biosynthetic process
OG0001161	response regulator transcription factor							GO:0097159	molecular_function	organic cyclic compound binding
OG0001161	response regulator transcription factor							GO:0023052	biological_process	signaling
OG0001161	response regulator transcription factor							GO:1903506	biological_process	regulation of nucleic acid-templated transcription
OG0001161	response regulator transcription factor							GO:0046483	biological_process	heterocycle metabolic process
OG0001161	response regulator transcription factor							GO:0019219	biological_process	regulation of nucleobase-containing compound metabolic process
OG0001161	response regulator transcription factor							GO:1901576	biological_process	organic substance biosynthetic process
OG0001161	response regulator transcription factor							GO:0019222	biological_process	regulation of metabolic process
OG0001161	response regulator transcription factor							GO:0006807	biological_process	nitrogen compound metabolic process
OG0001161	response regulator transcription factor							GO:0071704	biological_process	organic substance metabolic process
OG0001161	response regulator transcription factor							GO:0000160	biological_process	phosphorelay signal transduction system
OG0001161	response regulator transcription factor							GO:0009889	biological_process	regulation of biosynthetic process
OG0001161	response regulator transcription factor							GO:0043170	biological_process	macromolecule metabolic process
OG0001161	response regulator transcription factor							GO:1901360	biological_process	organic cyclic compound metabolic process
OG0001161	response regulator transcription factor							GO:1901363	molecular_function	heterocyclic compound binding
OG0001161	response regulator transcription factor							GO:1901362	biological_process	organic cyclic compound biosynthetic process
OG0001161	response regulator transcription factor							GO:0051252	biological_process	regulation of RNA metabolic process
OG0001161	response regulator transcription factor							GO:0010556	biological_process	regulation of macromolecule biosynthetic process
OG0001161	response regulator transcription factor							GO:0090304	biological_process	nucleic acid metabolic process
OG0001161	response regulator transcription factor							GO:0006725	biological_process	cellular aromatic compound metabolic process
OG0001161	response regulator transcription factor							GO:0016070	biological_process	RNA metabolic process
OG0001161	response regulator transcription factor							GO:0044237	biological_process	cellular metabolic process
OG0001161	response regulator transcription factor							GO:0044238	biological_process	primary metabolic process
OG0001161	response regulator transcription factor							GO:0006351	biological_process	DNA-templated transcription
OG0001161	response regulator transcription factor							GO:0050896	biological_process	response to stimulus
OG0001161	response regulator transcription factor							GO:0034641	biological_process	cellular nitrogen compound metabolic process
OG0001161	response regulator transcription factor							GO:0018130	biological_process	heterocycle biosynthetic process
OG0001161	response regulator transcription factor							GO:0006355	biological_process	regulation of DNA-templated transcription
OG0001161	response regulator transcription factor							GO:0008150	biological_process	biological_process
OG0001161	response regulator transcription factor							GO:0008152	biological_process	metabolic process
OG0001161	response regulator transcription factor							GO:0044249	biological_process	cellular biosynthetic process
OG0001161	response regulator transcription factor							GO:0003674	molecular_function	molecular_function
OG0001161	response regulator transcription factor							GO:0031323	biological_process	regulation of cellular metabolic process
OG0001161	response regulator transcription factor							GO:0080090	biological_process	regulation of primary metabolic process
OG0001161	response regulator transcription factor							GO:0003676	molecular_function	nucleic acid binding
OG0001161	response regulator transcription factor							GO:0003677	molecular_function	DNA binding
OG0001161	response regulator transcription factor							GO:0034654	biological_process	nucleobase-containing compound biosynthetic process
OG0001161	response regulator transcription factor							GO:0031326	biological_process	regulation of cellular biosynthetic process
OG0001161	response regulator transcription factor							GO:0060255	biological_process	regulation of macromolecule metabolic process
OG0001161	response regulator transcription factor							GO:0009058	biological_process	biosynthetic process
OG0001161	response regulator transcription factor							GO:0010467	biological_process	gene expression
OG0001161	response regulator transcription factor							GO:0009059	biological_process	macromolecule biosynthetic process
OG0001161	response regulator transcription factor							GO:0051171	biological_process	regulation of nitrogen compound metabolic process
OG0001161	response regulator transcription factor							GO:0035556	biological_process	intracellular signal transduction
OG0001161	response regulator transcription factor							GO:0010468	biological_process	regulation of gene expression
OG0001161	response regulator transcription factor							GO:0050789	biological_process	regulation of biological process
OG0001161	response regulator transcription factor							GO:0050794	biological_process	regulation of cellular process
OG0001161	response regulator transcription factor							GO:2001141	biological_process	regulation of RNA biosynthetic process
OG0001161	response regulator transcription factor							GO:0019438	biological_process	aromatic compound biosynthetic process
OG0001161	response regulator transcription factor							GO:0065007	biological_process	biological regulation
OG0001161	response regulator transcription factor							GO:0044271	biological_process	cellular nitrogen compound biosynthetic process
OG0001161	response regulator transcription factor							GO:0005488	molecular_function	binding
OG0001161	response regulator transcription factor							GO:0007154	biological_process	cell communication
OG0001161	response regulator transcription factor							GO:0097659	biological_process	nucleic acid-templated transcription
OG0001161	response regulator transcription factor							GO:0006139	biological_process	nucleobase-containing compound metabolic process
OG0001161	response regulator transcription factor							GO:0007165	biological_process	signal transduction
OG0001169	histidine phosphatase family protein							GO:0009058	biological_process	biosynthetic process
OG0001169	histidine phosphatase family protein							GO:0005996	biological_process	monosaccharide metabolic process
OG0001169	histidine phosphatase family protein							GO:0006094	biological_process	gluconeogenesis
OG0001169	histidine phosphatase family protein							GO:0044238	biological_process	primary metabolic process
OG0001169	histidine phosphatase family protein							GO:0016051	biological_process	carbohydrate biosynthetic process
OG0001169	histidine phosphatase family protein							GO:1901576	biological_process	organic substance biosynthetic process
OG0001169	histidine phosphatase family protein							GO:0008150	biological_process	biological_process
OG0001169	histidine phosphatase family protein							GO:0006006	biological_process	glucose metabolic process
OG0001169	histidine phosphatase family protein							GO:0019318	biological_process	hexose metabolic process
OG0001169	histidine phosphatase family protein							GO:0005975	biological_process	carbohydrate metabolic process
OG0001169	histidine phosphatase family protein							GO:0019319	biological_process	hexose biosynthetic process
OG0001169	histidine phosphatase family protein							GO:0008152	biological_process	metabolic process
OG0001169	histidine phosphatase family protein							GO:0071704	biological_process	organic substance metabolic process
OG0001169	histidine phosphatase family protein							GO:0044281	biological_process	small molecule metabolic process
OG0001169	histidine phosphatase family protein							GO:0044283	biological_process	small molecule biosynthetic process
OG0001169	histidine phosphatase family protein							GO:0046364	biological_process	monosaccharide biosynthetic process
OG0001196	carbonic anhydrase	K01673	cynT, can; carbonic anhydrase	[EC:4.2.1.1]	Nitrogen metabolism	Energy metabolism	Metabolism	GO:0043169	molecular_function	cation binding
OG0001196	carbonic anhydrase	K01673	cynT, can; carbonic anhydrase	[EC:4.2.1.1]	Nitrogen metabolism	Energy metabolism	Metabolism	GO:0046914	molecular_function	transition metal ion binding
OG0001196	carbonic anhydrase	K01673	cynT, can; carbonic anhydrase	[EC:4.2.1.1]	Nitrogen metabolism	Energy metabolism	Metabolism	GO:0016835	molecular_function	carbon-oxygen lyase activity
OG0001196	carbonic anhydrase	K01673	cynT, can; carbonic anhydrase	[EC:4.2.1.1]	Nitrogen metabolism	Energy metabolism	Metabolism	GO:0016836	molecular_function	hydro-lyase activity
OG0001196	carbonic anhydrase	K01673	cynT, can; carbonic anhydrase	[EC:4.2.1.1]	Nitrogen metabolism	Energy metabolism	Metabolism	GO:0009605	biological_process	response to external stimulus
OG0001196	carbonic anhydrase	K01673	cynT, can; carbonic anhydrase	[EC:4.2.1.1]	Nitrogen metabolism	Energy metabolism	Metabolism	GO:0009991	biological_process	response to extracellular stimulus
OG0001196	carbonic anhydrase	K01673	cynT, can; carbonic anhydrase	[EC:4.2.1.1]	Nitrogen metabolism	Energy metabolism	Metabolism	GO:0015976	biological_process	carbon utilization
OG0001196	carbonic anhydrase	K01673	cynT, can; carbonic anhydrase	[EC:4.2.1.1]	Nitrogen metabolism	Energy metabolism	Metabolism	GO:0008270	molecular_function	zinc ion binding
OG0001196	carbonic anhydrase	K01673	cynT, can; carbonic anhydrase	[EC:4.2.1.1]	Nitrogen metabolism	Energy metabolism	Metabolism	GO:0050896	biological_process	response to stimulus
OG0001196	carbonic anhydrase	K01673	cynT, can; carbonic anhydrase	[EC:4.2.1.1]	Nitrogen metabolism	Energy metabolism	Metabolism	GO:0003824	molecular_function	catalytic activity
OG0001196	carbonic anhydrase	K01673	cynT, can; carbonic anhydrase	[EC:4.2.1.1]	Nitrogen metabolism	Energy metabolism	Metabolism	GO:0005488	molecular_function	binding
OG0001196	carbonic anhydrase	K01673	cynT, can; carbonic anhydrase	[EC:4.2.1.1]	Nitrogen metabolism	Energy metabolism	Metabolism	GO:0031667	biological_process	response to nutrient levels
OG0001196	carbonic anhydrase	K01673	cynT, can; carbonic anhydrase	[EC:4.2.1.1]	Nitrogen metabolism	Energy metabolism	Metabolism	GO:0008150	biological_process	biological_process
OG0001196	carbonic anhydrase	K01673	cynT, can; carbonic anhydrase	[EC:4.2.1.1]	Nitrogen metabolism	Energy metabolism	Metabolism	GO:0046872	molecular_function	metal ion binding
OG0001196	carbonic anhydrase	K01673	cynT, can; carbonic anhydrase	[EC:4.2.1.1]	Nitrogen metabolism	Energy metabolism	Metabolism	GO:0004089	molecular_function	carbonate dehydratase activity
OG0001196	carbonic anhydrase	K01673	cynT, can; carbonic anhydrase	[EC:4.2.1.1]	Nitrogen metabolism	Energy metabolism	Metabolism	GO:0003674	molecular_function	molecular_function
OG0001196	carbonic anhydrase	K01673	cynT, can; carbonic anhydrase	[EC:4.2.1.1]	Nitrogen metabolism	Energy metabolism	Metabolism	GO:0016829	molecular_function	lyase activity
OG0001196	carbonic anhydrase	K01673	cynT, can; carbonic anhydrase	[EC:4.2.1.1]	Nitrogen metabolism	Energy metabolism	Metabolism	GO:0043167	molecular_function	ion binding
OG0001234	lipid A export permease/ATP-binding protein MsbA	K11085	msbA; ATP-binding cassette, subfamily B, bacterial MsbA	[EC:7.5.2.6]	ABC transporters	Membrane transport	Environmental Information Processing	GO:0042626	molecular_function	ATPase-coupled transmembrane transporter activity
OG0001234	lipid A export permease/ATP-binding protein MsbA	K11085	msbA; ATP-binding cassette, subfamily B, bacterial MsbA	[EC:7.5.2.6]	ABC transporters	Membrane transport	Environmental Information Processing	GO:0009987	biological_process	cellular process
OG0001234	lipid A export permease/ATP-binding protein MsbA	K11085	msbA; ATP-binding cassette, subfamily B, bacterial MsbA	[EC:7.5.2.6]	ABC transporters	Membrane transport	Environmental Information Processing	GO:0140359	molecular_function	ABC-type transporter activity
OG0001234	lipid A export permease/ATP-binding protein MsbA	K11085	msbA; ATP-binding cassette, subfamily B, bacterial MsbA	[EC:7.5.2.6]	ABC transporters	Membrane transport	Environmental Information Processing	GO:0097159	molecular_function	organic cyclic compound binding
OG0001234	lipid A export permease/ATP-binding protein MsbA	K11085	msbA; ATP-binding cassette, subfamily B, bacterial MsbA	[EC:7.5.2.6]	ABC transporters	Membrane transport	Environmental Information Processing	GO:0005575	cellular_component	cellular_component
OG0001234	lipid A export permease/ATP-binding protein MsbA	K11085	msbA; ATP-binding cassette, subfamily B, bacterial MsbA	[EC:7.5.2.6]	ABC transporters	Membrane transport	Environmental Information Processing	GO:0005319	molecular_function	lipid transporter activity
OG0001234	lipid A export permease/ATP-binding protein MsbA	K11085	msbA; ATP-binding cassette, subfamily B, bacterial MsbA	[EC:7.5.2.6]	ABC transporters	Membrane transport	Environmental Information Processing	GO:0022857	molecular_function	transmembrane transporter activity
OG0001234	lipid A export permease/ATP-binding protein MsbA	K11085	msbA; ATP-binding cassette, subfamily B, bacterial MsbA	[EC:7.5.2.6]	ABC transporters	Membrane transport	Environmental Information Processing	GO:0071944	cellular_component	cell periphery
OG0001234	lipid A export permease/ATP-binding protein MsbA	K11085	msbA; ATP-binding cassette, subfamily B, bacterial MsbA	[EC:7.5.2.6]	ABC transporters	Membrane transport	Environmental Information Processing	GO:1901265	molecular_function	nucleoside phosphate binding
OG0001234	lipid A export permease/ATP-binding protein MsbA	K11085	msbA; ATP-binding cassette, subfamily B, bacterial MsbA	[EC:7.5.2.6]	ABC transporters	Membrane transport	Environmental Information Processing	GO:0033036	biological_process	macromolecule localization
OG0001234	lipid A export permease/ATP-binding protein MsbA	K11085	msbA; ATP-binding cassette, subfamily B, bacterial MsbA	[EC:7.5.2.6]	ABC transporters	Membrane transport	Environmental Information Processing	GO:0016787	molecular_function	hydrolase activity
OG0001234	lipid A export permease/ATP-binding protein MsbA	K11085	msbA; ATP-binding cassette, subfamily B, bacterial MsbA	[EC:7.5.2.6]	ABC transporters	Membrane transport	Environmental Information Processing	GO:0005524	molecular_function	ATP binding
OG0001234	lipid A export permease/ATP-binding protein MsbA	K11085	msbA; ATP-binding cassette, subfamily B, bacterial MsbA	[EC:7.5.2.6]	ABC transporters	Membrane transport	Environmental Information Processing	GO:0016020	cellular_component	membrane
OG0001234	lipid A export permease/ATP-binding protein MsbA	K11085	msbA; ATP-binding cassette, subfamily B, bacterial MsbA	[EC:7.5.2.6]	ABC transporters	Membrane transport	Environmental Information Processing	GO:0110165	cellular_component	cellular anatomical entity
OG0001234	lipid A export permease/ATP-binding protein MsbA	K11085	msbA; ATP-binding cassette, subfamily B, bacterial MsbA	[EC:7.5.2.6]	ABC transporters	Membrane transport	Environmental Information Processing	GO:0022804	molecular_function	active transmembrane transporter activity
OG0001234	lipid A export permease/ATP-binding protein MsbA	K11085	msbA; ATP-binding cassette, subfamily B, bacterial MsbA	[EC:7.5.2.6]	ABC transporters	Membrane transport	Environmental Information Processing	GO:0006869	biological_process	lipid transport
OG0001234	lipid A export permease/ATP-binding protein MsbA	K11085	msbA; ATP-binding cassette, subfamily B, bacterial MsbA	[EC:7.5.2.6]	ABC transporters	Membrane transport	Environmental Information Processing	GO:0016021	cellular_component	integral component of membrane
OG0001234	lipid A export permease/ATP-binding protein MsbA	K11085	msbA; ATP-binding cassette, subfamily B, bacterial MsbA	[EC:7.5.2.6]	ABC transporters	Membrane transport	Environmental Information Processing	GO:0097367	molecular_function	carbohydrate derivative binding
OG0001234	lipid A export permease/ATP-binding protein MsbA	K11085	msbA; ATP-binding cassette, subfamily B, bacterial MsbA	[EC:7.5.2.6]	ABC transporters	Membrane transport	Environmental Information Processing	GO:0008150	biological_process	biological_process
OG0001234	lipid A export permease/ATP-binding protein MsbA	K11085	msbA; ATP-binding cassette, subfamily B, bacterial MsbA	[EC:7.5.2.6]	ABC transporters	Membrane transport	Environmental Information Processing	GO:0071702	biological_process	organic substance transport
OG0001234	lipid A export permease/ATP-binding protein MsbA	K11085	msbA; ATP-binding cassette, subfamily B, bacterial MsbA	[EC:7.5.2.6]	ABC transporters	Membrane transport	Environmental Information Processing	GO:0003674	molecular_function	molecular_function
OG0001234	lipid A export permease/ATP-binding protein MsbA	K11085	msbA; ATP-binding cassette, subfamily B, bacterial MsbA	[EC:7.5.2.6]	ABC transporters	Membrane transport	Environmental Information Processing	GO:0030554	molecular_function	adenyl nucleotide binding
OG0001234	lipid A export permease/ATP-binding protein MsbA	K11085	msbA; ATP-binding cassette, subfamily B, bacterial MsbA	[EC:7.5.2.6]	ABC transporters	Membrane transport	Environmental Information Processing	GO:0006810	biological_process	transport
OG0001234	lipid A export permease/ATP-binding protein MsbA	K11085	msbA; ATP-binding cassette, subfamily B, bacterial MsbA	[EC:7.5.2.6]	ABC transporters	Membrane transport	Environmental Information Processing	GO:0043167	molecular_function	ion binding
OG0001234	lipid A export permease/ATP-binding protein MsbA	K11085	msbA; ATP-binding cassette, subfamily B, bacterial MsbA	[EC:7.5.2.6]	ABC transporters	Membrane transport	Environmental Information Processing	GO:0005215	molecular_function	transporter activity
OG0001234	lipid A export permease/ATP-binding protein MsbA	K11085	msbA; ATP-binding cassette, subfamily B, bacterial MsbA	[EC:7.5.2.6]	ABC transporters	Membrane transport	Environmental Information Processing	GO:0043168	molecular_function	anion binding
OG0001234	lipid A export permease/ATP-binding protein MsbA	K11085	msbA; ATP-binding cassette, subfamily B, bacterial MsbA	[EC:7.5.2.6]	ABC transporters	Membrane transport	Environmental Information Processing	GO:0051234	biological_process	establishment of localization
OG0001234	lipid A export permease/ATP-binding protein MsbA	K11085	msbA; ATP-binding cassette, subfamily B, bacterial MsbA	[EC:7.5.2.6]	ABC transporters	Membrane transport	Environmental Information Processing	GO:0000166	molecular_function	nucleotide binding
OG0001234	lipid A export permease/ATP-binding protein MsbA	K11085	msbA; ATP-binding cassette, subfamily B, bacterial MsbA	[EC:7.5.2.6]	ABC transporters	Membrane transport	Environmental Information Processing	GO:0015399	molecular_function	primary active transmembrane transporter activity
OG0001234	lipid A export permease/ATP-binding protein MsbA	K11085	msbA; ATP-binding cassette, subfamily B, bacterial MsbA	[EC:7.5.2.6]	ABC transporters	Membrane transport	Environmental Information Processing	GO:0032553	molecular_function	ribonucleotide binding
OG0001234	lipid A export permease/ATP-binding protein MsbA	K11085	msbA; ATP-binding cassette, subfamily B, bacterial MsbA	[EC:7.5.2.6]	ABC transporters	Membrane transport	Environmental Information Processing	GO:0032555	molecular_function	purine ribonucleotide binding
OG0001234	lipid A export permease/ATP-binding protein MsbA	K11085	msbA; ATP-binding cassette, subfamily B, bacterial MsbA	[EC:7.5.2.6]	ABC transporters	Membrane transport	Environmental Information Processing	GO:0051179	biological_process	localization
OG0001234	lipid A export permease/ATP-binding protein MsbA	K11085	msbA; ATP-binding cassette, subfamily B, bacterial MsbA	[EC:7.5.2.6]	ABC transporters	Membrane transport	Environmental Information Processing	GO:0055085	biological_process	transmembrane transport
OG0001234	lipid A export permease/ATP-binding protein MsbA	K11085	msbA; ATP-binding cassette, subfamily B, bacterial MsbA	[EC:7.5.2.6]	ABC transporters	Membrane transport	Environmental Information Processing	GO:1901363	molecular_function	heterocyclic compound binding
OG0001234	lipid A export permease/ATP-binding protein MsbA	K11085	msbA; ATP-binding cassette, subfamily B, bacterial MsbA	[EC:7.5.2.6]	ABC transporters	Membrane transport	Environmental Information Processing	GO:0032559	molecular_function	adenyl ribonucleotide binding
OG0001234	lipid A export permease/ATP-binding protein MsbA	K11085	msbA; ATP-binding cassette, subfamily B, bacterial MsbA	[EC:7.5.2.6]	ABC transporters	Membrane transport	Environmental Information Processing	GO:0003824	molecular_function	catalytic activity
OG0001234	lipid A export permease/ATP-binding protein MsbA	K11085	msbA; ATP-binding cassette, subfamily B, bacterial MsbA	[EC:7.5.2.6]	ABC transporters	Membrane transport	Environmental Information Processing	GO:0005488	molecular_function	binding
OG0001234	lipid A export permease/ATP-binding protein MsbA	K11085	msbA; ATP-binding cassette, subfamily B, bacterial MsbA	[EC:7.5.2.6]	ABC transporters	Membrane transport	Environmental Information Processing	GO:0140657	molecular_function	ATP-dependent activity
OG0001234	lipid A export permease/ATP-binding protein MsbA	K11085	msbA; ATP-binding cassette, subfamily B, bacterial MsbA	[EC:7.5.2.6]	ABC transporters	Membrane transport	Environmental Information Processing	GO:0017076	molecular_function	purine nucleotide binding
OG0001234	lipid A export permease/ATP-binding protein MsbA	K11085	msbA; ATP-binding cassette, subfamily B, bacterial MsbA	[EC:7.5.2.6]	ABC transporters	Membrane transport	Environmental Information Processing	GO:0035639	molecular_function	purine ribonucleoside triphosphate binding
OG0001234	lipid A export permease/ATP-binding protein MsbA	K11085	msbA; ATP-binding cassette, subfamily B, bacterial MsbA	[EC:7.5.2.6]	ABC transporters	Membrane transport	Environmental Information Processing	GO:0031224	cellular_component	intrinsic component of membrane
OG0001234	lipid A export permease/ATP-binding protein MsbA	K11085	msbA; ATP-binding cassette, subfamily B, bacterial MsbA	[EC:7.5.2.6]	ABC transporters	Membrane transport	Environmental Information Processing	GO:0034040	molecular_function	ATPase-coupled lipid transmembrane transporter activity
OG0001234	lipid A export permease/ATP-binding protein MsbA	K11085	msbA; ATP-binding cassette, subfamily B, bacterial MsbA	[EC:7.5.2.6]	ABC transporters	Membrane transport	Environmental Information Processing	GO:0010876	biological_process	lipid localization
OG0001234	lipid A export permease/ATP-binding protein MsbA	K11085	msbA; ATP-binding cassette, subfamily B, bacterial MsbA	[EC:7.5.2.6]	ABC transporters	Membrane transport	Environmental Information Processing	GO:0036094	molecular_function	small molecule binding
OG0001234	lipid A export permease/ATP-binding protein MsbA	K11085	msbA; ATP-binding cassette, subfamily B, bacterial MsbA	[EC:7.5.2.6]	ABC transporters	Membrane transport	Environmental Information Processing	GO:0005886	cellular_component	plasma membrane
OG0001338	bifunctional phosphopantothenoylcysteine decarboxylase/phosphopantothenate--cysteine ligase CoaBC	K13038	coaBC, dfp; phosphopantothenoylcysteine decarboxylase / phosphopantothenate---cysteine ligase	[EC:4.1.1.36 6.3.2.5]	Pantothenate and CoA biosynthesis	Metabolism of cofactors and vitamins	Metabolism	GO:0009987	biological_process	cellular process
OG0001338	bifunctional phosphopantothenoylcysteine decarboxylase/phosphopantothenate--cysteine ligase CoaBC	K13038	coaBC, dfp; phosphopantothenoylcysteine decarboxylase / phosphopantothenate---cysteine ligase	[EC:4.1.1.36 6.3.2.5]	Pantothenate and CoA biosynthesis	Metabolism of cofactors and vitamins	Metabolism	GO:0097159	molecular_function	organic cyclic compound binding
OG0001338	bifunctional phosphopantothenoylcysteine decarboxylase/phosphopantothenate--cysteine ligase CoaBC	K13038	coaBC, dfp; phosphopantothenoylcysteine decarboxylase / phosphopantothenate---cysteine ligase	[EC:4.1.1.36 6.3.2.5]	Pantothenate and CoA biosynthesis	Metabolism of cofactors and vitamins	Metabolism	GO:0072329	biological_process	monocarboxylic acid catabolic process
OG0001338	bifunctional phosphopantothenoylcysteine decarboxylase/phosphopantothenate--cysteine ligase CoaBC	K13038	coaBC, dfp; phosphopantothenoylcysteine decarboxylase / phosphopantothenate---cysteine ligase	[EC:4.1.1.36 6.3.2.5]	Pantothenate and CoA biosynthesis	Metabolism of cofactors and vitamins	Metabolism	GO:0006793	biological_process	phosphorus metabolic process
OG0001338	bifunctional phosphopantothenoylcysteine decarboxylase/phosphopantothenate--cysteine ligase CoaBC	K13038	coaBC, dfp; phosphopantothenoylcysteine decarboxylase / phosphopantothenate---cysteine ligase	[EC:4.1.1.36 6.3.2.5]	Pantothenate and CoA biosynthesis	Metabolism of cofactors and vitamins	Metabolism	GO:0006796	biological_process	phosphate-containing compound metabolic process
OG0001338	bifunctional phosphopantothenoylcysteine decarboxylase/phosphopantothenate--cysteine ligase CoaBC	K13038	coaBC, dfp; phosphopantothenoylcysteine decarboxylase / phosphopantothenate---cysteine ligase	[EC:4.1.1.36 6.3.2.5]	Pantothenate and CoA biosynthesis	Metabolism of cofactors and vitamins	Metabolism	GO:0006163	biological_process	purine nucleotide metabolic process
OG0001338	bifunctional phosphopantothenoylcysteine decarboxylase/phosphopantothenate--cysteine ligase CoaBC	K13038	coaBC, dfp; phosphopantothenoylcysteine decarboxylase / phosphopantothenate---cysteine ligase	[EC:4.1.1.36 6.3.2.5]	Pantothenate and CoA biosynthesis	Metabolism of cofactors and vitamins	Metabolism	GO:0046483	biological_process	heterocycle metabolic process
OG0001338	bifunctional phosphopantothenoylcysteine decarboxylase/phosphopantothenate--cysteine ligase CoaBC	K13038	coaBC, dfp; phosphopantothenoylcysteine decarboxylase / phosphopantothenate---cysteine ligase	[EC:4.1.1.36 6.3.2.5]	Pantothenate and CoA biosynthesis	Metabolism of cofactors and vitamins	Metabolism	GO:0032787	biological_process	monocarboxylic acid metabolic process
OG0001338	bifunctional phosphopantothenoylcysteine decarboxylase/phosphopantothenate--cysteine ligase CoaBC	K13038	coaBC, dfp; phosphopantothenoylcysteine decarboxylase / phosphopantothenate---cysteine ligase	[EC:4.1.1.36 6.3.2.5]	Pantothenate and CoA biosynthesis	Metabolism of cofactors and vitamins	Metabolism	GO:0006164	biological_process	purine nucleotide biosynthetic process
OG0001338	bifunctional phosphopantothenoylcysteine decarboxylase/phosphopantothenate--cysteine ligase CoaBC	K13038	coaBC, dfp; phosphopantothenoylcysteine decarboxylase / phosphopantothenate---cysteine ligase	[EC:4.1.1.36 6.3.2.5]	Pantothenate and CoA biosynthesis	Metabolism of cofactors and vitamins	Metabolism	GO:1901576	biological_process	organic substance biosynthetic process
OG0001338	bifunctional phosphopantothenoylcysteine decarboxylase/phosphopantothenate--cysteine ligase CoaBC	K13038	coaBC, dfp; phosphopantothenoylcysteine decarboxylase / phosphopantothenate---cysteine ligase	[EC:4.1.1.36 6.3.2.5]	Pantothenate and CoA biosynthesis	Metabolism of cofactors and vitamins	Metabolism	GO:0006807	biological_process	nitrogen compound metabolic process
OG0001338	bifunctional phosphopantothenoylcysteine decarboxylase/phosphopantothenate--cysteine ligase CoaBC	K13038	coaBC, dfp; phosphopantothenoylcysteine decarboxylase / phosphopantothenate---cysteine ligase	[EC:4.1.1.36 6.3.2.5]	Pantothenate and CoA biosynthesis	Metabolism of cofactors and vitamins	Metabolism	GO:0009111	biological_process	vitamin catabolic process
OG0001338	bifunctional phosphopantothenoylcysteine decarboxylase/phosphopantothenate--cysteine ligase CoaBC	K13038	coaBC, dfp; phosphopantothenoylcysteine decarboxylase / phosphopantothenate---cysteine ligase	[EC:4.1.1.36 6.3.2.5]	Pantothenate and CoA biosynthesis	Metabolism of cofactors and vitamins	Metabolism	GO:0004632	molecular_function	phosphopantothenate--cysteine ligase activity
OG0001338	bifunctional phosphopantothenoylcysteine decarboxylase/phosphopantothenate--cysteine ligase CoaBC	K13038	coaBC, dfp; phosphopantothenoylcysteine decarboxylase / phosphopantothenate---cysteine ligase	[EC:4.1.1.36 6.3.2.5]	Pantothenate and CoA biosynthesis	Metabolism of cofactors and vitamins	Metabolism	GO:0046872	molecular_function	metal ion binding
OG0001338	bifunctional phosphopantothenoylcysteine decarboxylase/phosphopantothenate--cysteine ligase CoaBC	K13038	coaBC, dfp; phosphopantothenoylcysteine decarboxylase / phosphopantothenate---cysteine ligase	[EC:4.1.1.36 6.3.2.5]	Pantothenate and CoA biosynthesis	Metabolism of cofactors and vitamins	Metabolism	GO:0071704	biological_process	organic substance metabolic process
OG0001338	bifunctional phosphopantothenoylcysteine decarboxylase/phosphopantothenate--cysteine ligase CoaBC	K13038	coaBC, dfp; phosphopantothenoylcysteine decarboxylase / phosphopantothenate---cysteine ligase	[EC:4.1.1.36 6.3.2.5]	Pantothenate and CoA biosynthesis	Metabolism of cofactors and vitamins	Metabolism	GO:0004633	molecular_function	phosphopantothenoylcysteine decarboxylase activity
OG0001338	bifunctional phosphopantothenoylcysteine decarboxylase/phosphopantothenate--cysteine ligase CoaBC	K13038	coaBC, dfp; phosphopantothenoylcysteine decarboxylase / phosphopantothenate---cysteine ligase	[EC:4.1.1.36 6.3.2.5]	Pantothenate and CoA biosynthesis	Metabolism of cofactors and vitamins	Metabolism	GO:1901575	biological_process	organic substance catabolic process
OG0001338	bifunctional phosphopantothenoylcysteine decarboxylase/phosphopantothenate--cysteine ligase CoaBC	K13038	coaBC, dfp; phosphopantothenoylcysteine decarboxylase / phosphopantothenate---cysteine ligase	[EC:4.1.1.36 6.3.2.5]	Pantothenate and CoA biosynthesis	Metabolism of cofactors and vitamins	Metabolism	GO:0009117	biological_process	nucleotide metabolic process
OG0001338	bifunctional phosphopantothenoylcysteine decarboxylase/phosphopantothenate--cysteine ligase CoaBC	K13038	coaBC, dfp; phosphopantothenoylcysteine decarboxylase / phosphopantothenate---cysteine ligase	[EC:4.1.1.36 6.3.2.5]	Pantothenate and CoA biosynthesis	Metabolism of cofactors and vitamins	Metabolism	GO:0043167	molecular_function	ion binding
OG0001338	bifunctional phosphopantothenoylcysteine decarboxylase/phosphopantothenate--cysteine ligase CoaBC	K13038	coaBC, dfp; phosphopantothenoylcysteine decarboxylase / phosphopantothenate---cysteine ligase	[EC:4.1.1.36 6.3.2.5]	Pantothenate and CoA biosynthesis	Metabolism of cofactors and vitamins	Metabolism	GO:0043168	molecular_function	anion binding
OG0001338	bifunctional phosphopantothenoylcysteine decarboxylase/phosphopantothenate--cysteine ligase CoaBC	K13038	coaBC, dfp; phosphopantothenoylcysteine decarboxylase / phosphopantothenate---cysteine ligase	[EC:4.1.1.36 6.3.2.5]	Pantothenate and CoA biosynthesis	Metabolism of cofactors and vitamins	Metabolism	GO:0043169	molecular_function	cation binding
OG0001338	bifunctional phosphopantothenoylcysteine decarboxylase/phosphopantothenate--cysteine ligase CoaBC	K13038	coaBC, dfp; phosphopantothenoylcysteine decarboxylase / phosphopantothenate---cysteine ligase	[EC:4.1.1.36 6.3.2.5]	Pantothenate and CoA biosynthesis	Metabolism of cofactors and vitamins	Metabolism	GO:0090407	biological_process	organophosphate biosynthetic process
OG0001338	bifunctional phosphopantothenoylcysteine decarboxylase/phosphopantothenate--cysteine ligase CoaBC	K13038	coaBC, dfp; phosphopantothenoylcysteine decarboxylase / phosphopantothenate---cysteine ligase	[EC:4.1.1.36 6.3.2.5]	Pantothenate and CoA biosynthesis	Metabolism of cofactors and vitamins	Metabolism	GO:0000166	molecular_function	nucleotide binding
OG0001338	bifunctional phosphopantothenoylcysteine decarboxylase/phosphopantothenate--cysteine ligase CoaBC	K13038	coaBC, dfp; phosphopantothenoylcysteine decarboxylase / phosphopantothenate---cysteine ligase	[EC:4.1.1.36 6.3.2.5]	Pantothenate and CoA biosynthesis	Metabolism of cofactors and vitamins	Metabolism	GO:0019752	biological_process	carboxylic acid metabolic process
OG0001338	bifunctional phosphopantothenoylcysteine decarboxylase/phosphopantothenate--cysteine ligase CoaBC	K13038	coaBC, dfp; phosphopantothenoylcysteine decarboxylase / phosphopantothenate---cysteine ligase	[EC:4.1.1.36 6.3.2.5]	Pantothenate and CoA biosynthesis	Metabolism of cofactors and vitamins	Metabolism	GO:0032553	molecular_function	ribonucleotide binding
OG0001338	bifunctional phosphopantothenoylcysteine decarboxylase/phosphopantothenate--cysteine ligase CoaBC	K13038	coaBC, dfp; phosphopantothenoylcysteine decarboxylase / phosphopantothenate---cysteine ligase	[EC:4.1.1.36 6.3.2.5]	Pantothenate and CoA biosynthesis	Metabolism of cofactors and vitamins	Metabolism	GO:0009259	biological_process	ribonucleotide metabolic process
OG0001338	bifunctional phosphopantothenoylcysteine decarboxylase/phosphopantothenate--cysteine ligase CoaBC	K13038	coaBC, dfp; phosphopantothenoylcysteine decarboxylase / phosphopantothenate---cysteine ligase	[EC:4.1.1.36 6.3.2.5]	Pantothenate and CoA biosynthesis	Metabolism of cofactors and vitamins	Metabolism	GO:0009260	biological_process	ribonucleotide biosynthetic process
OG0001338	bifunctional phosphopantothenoylcysteine decarboxylase/phosphopantothenate--cysteine ligase CoaBC	K13038	coaBC, dfp; phosphopantothenoylcysteine decarboxylase / phosphopantothenate---cysteine ligase	[EC:4.1.1.36 6.3.2.5]	Pantothenate and CoA biosynthesis	Metabolism of cofactors and vitamins	Metabolism	GO:0043436	biological_process	oxoacid metabolic process
OG0001338	bifunctional phosphopantothenoylcysteine decarboxylase/phosphopantothenate--cysteine ligase CoaBC	K13038	coaBC, dfp; phosphopantothenoylcysteine decarboxylase / phosphopantothenate---cysteine ligase	[EC:4.1.1.36 6.3.2.5]	Pantothenate and CoA biosynthesis	Metabolism of cofactors and vitamins	Metabolism	GO:1901360	biological_process	organic cyclic compound metabolic process
OG0001338	bifunctional phosphopantothenoylcysteine decarboxylase/phosphopantothenate--cysteine ligase CoaBC	K13038	coaBC, dfp; phosphopantothenoylcysteine decarboxylase / phosphopantothenate---cysteine ligase	[EC:4.1.1.36 6.3.2.5]	Pantothenate and CoA biosynthesis	Metabolism of cofactors and vitamins	Metabolism	GO:0055086	biological_process	nucleobase-containing small molecule metabolic process
OG0001338	bifunctional phosphopantothenoylcysteine decarboxylase/phosphopantothenate--cysteine ligase CoaBC	K13038	coaBC, dfp; phosphopantothenoylcysteine decarboxylase / phosphopantothenate---cysteine ligase	[EC:4.1.1.36 6.3.2.5]	Pantothenate and CoA biosynthesis	Metabolism of cofactors and vitamins	Metabolism	GO:1901363	molecular_function	heterocyclic compound binding
OG0001338	bifunctional phosphopantothenoylcysteine decarboxylase/phosphopantothenate--cysteine ligase CoaBC	K13038	coaBC, dfp; phosphopantothenoylcysteine decarboxylase / phosphopantothenate---cysteine ligase	[EC:4.1.1.36 6.3.2.5]	Pantothenate and CoA biosynthesis	Metabolism of cofactors and vitamins	Metabolism	GO:1901362	biological_process	organic cyclic compound biosynthetic process
OG0001338	bifunctional phosphopantothenoylcysteine decarboxylase/phosphopantothenate--cysteine ligase CoaBC	K13038	coaBC, dfp; phosphopantothenoylcysteine decarboxylase / phosphopantothenate---cysteine ligase	[EC:4.1.1.36 6.3.2.5]	Pantothenate and CoA biosynthesis	Metabolism of cofactors and vitamins	Metabolism	GO:0006575	biological_process	cellular modified amino acid metabolic process
OG0001338	bifunctional phosphopantothenoylcysteine decarboxylase/phosphopantothenate--cysteine ligase CoaBC	K13038	coaBC, dfp; phosphopantothenoylcysteine decarboxylase / phosphopantothenate---cysteine ligase	[EC:4.1.1.36 6.3.2.5]	Pantothenate and CoA biosynthesis	Metabolism of cofactors and vitamins	Metabolism	GO:0019637	biological_process	organophosphate metabolic process
OG0001338	bifunctional phosphopantothenoylcysteine decarboxylase/phosphopantothenate--cysteine ligase CoaBC	K13038	coaBC, dfp; phosphopantothenoylcysteine decarboxylase / phosphopantothenate---cysteine ligase	[EC:4.1.1.36 6.3.2.5]	Pantothenate and CoA biosynthesis	Metabolism of cofactors and vitamins	Metabolism	GO:0046390	biological_process	ribose phosphate biosynthetic process
OG0001338	bifunctional phosphopantothenoylcysteine decarboxylase/phosphopantothenate--cysteine ligase CoaBC	K13038	coaBC, dfp; phosphopantothenoylcysteine decarboxylase / phosphopantothenate---cysteine ligase	[EC:4.1.1.36 6.3.2.5]	Pantothenate and CoA biosynthesis	Metabolism of cofactors and vitamins	Metabolism	GO:0016054	biological_process	organic acid catabolic process
OG0001338	bifunctional phosphopantothenoylcysteine decarboxylase/phosphopantothenate--cysteine ligase CoaBC	K13038	coaBC, dfp; phosphopantothenoylcysteine decarboxylase / phosphopantothenate---cysteine ligase	[EC:4.1.1.36 6.3.2.5]	Pantothenate and CoA biosynthesis	Metabolism of cofactors and vitamins	Metabolism	GO:0046395	biological_process	carboxylic acid catabolic process
OG0001338	bifunctional phosphopantothenoylcysteine decarboxylase/phosphopantothenate--cysteine ligase CoaBC	K13038	coaBC, dfp; phosphopantothenoylcysteine decarboxylase / phosphopantothenate---cysteine ligase	[EC:4.1.1.36 6.3.2.5]	Pantothenate and CoA biosynthesis	Metabolism of cofactors and vitamins	Metabolism	GO:0016829	molecular_function	lyase activity
OG0001338	bifunctional phosphopantothenoylcysteine decarboxylase/phosphopantothenate--cysteine ligase CoaBC	K13038	coaBC, dfp; phosphopantothenoylcysteine decarboxylase / phosphopantothenate---cysteine ligase	[EC:4.1.1.36 6.3.2.5]	Pantothenate and CoA biosynthesis	Metabolism of cofactors and vitamins	Metabolism	GO:0009150	biological_process	purine ribonucleotide metabolic process
OG0001338	bifunctional phosphopantothenoylcysteine decarboxylase/phosphopantothenate--cysteine ligase CoaBC	K13038	coaBC, dfp; phosphopantothenoylcysteine decarboxylase / phosphopantothenate---cysteine ligase	[EC:4.1.1.36 6.3.2.5]	Pantothenate and CoA biosynthesis	Metabolism of cofactors and vitamins	Metabolism	GO:0016830	molecular_function	carbon-carbon lyase activity
OG0001338	bifunctional phosphopantothenoylcysteine decarboxylase/phosphopantothenate--cysteine ligase CoaBC	K13038	coaBC, dfp; phosphopantothenoylcysteine decarboxylase / phosphopantothenate---cysteine ligase	[EC:4.1.1.36 6.3.2.5]	Pantothenate and CoA biosynthesis	Metabolism of cofactors and vitamins	Metabolism	GO:0016831	molecular_function	carboxy-lyase activity
OG0001338	bifunctional phosphopantothenoylcysteine decarboxylase/phosphopantothenate--cysteine ligase CoaBC	K13038	coaBC, dfp; phosphopantothenoylcysteine decarboxylase / phosphopantothenate---cysteine ligase	[EC:4.1.1.36 6.3.2.5]	Pantothenate and CoA biosynthesis	Metabolism of cofactors and vitamins	Metabolism	GO:0009152	biological_process	purine ribonucleotide biosynthetic process
OG0001338	bifunctional phosphopantothenoylcysteine decarboxylase/phosphopantothenate--cysteine ligase CoaBC	K13038	coaBC, dfp; phosphopantothenoylcysteine decarboxylase / phosphopantothenate---cysteine ligase	[EC:4.1.1.36 6.3.2.5]	Pantothenate and CoA biosynthesis	Metabolism of cofactors and vitamins	Metabolism	GO:0015936	biological_process	coenzyme A metabolic process
OG0001338	bifunctional phosphopantothenoylcysteine decarboxylase/phosphopantothenate--cysteine ligase CoaBC	K13038	coaBC, dfp; phosphopantothenoylcysteine decarboxylase / phosphopantothenate---cysteine ligase	[EC:4.1.1.36 6.3.2.5]	Pantothenate and CoA biosynthesis	Metabolism of cofactors and vitamins	Metabolism	GO:0015937	biological_process	coenzyme A biosynthetic process
OG0001338	bifunctional phosphopantothenoylcysteine decarboxylase/phosphopantothenate--cysteine ligase CoaBC	K13038	coaBC, dfp; phosphopantothenoylcysteine decarboxylase / phosphopantothenate---cysteine ligase	[EC:4.1.1.36 6.3.2.5]	Pantothenate and CoA biosynthesis	Metabolism of cofactors and vitamins	Metabolism	GO:0006082	biological_process	organic acid metabolic process
OG0001338	bifunctional phosphopantothenoylcysteine decarboxylase/phosphopantothenate--cysteine ligase CoaBC	K13038	coaBC, dfp; phosphopantothenoylcysteine decarboxylase / phosphopantothenate---cysteine ligase	[EC:4.1.1.36 6.3.2.5]	Pantothenate and CoA biosynthesis	Metabolism of cofactors and vitamins	Metabolism	GO:0015939	biological_process	pantothenate metabolic process
OG0001338	bifunctional phosphopantothenoylcysteine decarboxylase/phosphopantothenate--cysteine ligase CoaBC	K13038	coaBC, dfp; phosphopantothenoylcysteine decarboxylase / phosphopantothenate---cysteine ligase	[EC:4.1.1.36 6.3.2.5]	Pantothenate and CoA biosynthesis	Metabolism of cofactors and vitamins	Metabolism	GO:0006725	biological_process	cellular aromatic compound metabolic process
OG0001338	bifunctional phosphopantothenoylcysteine decarboxylase/phosphopantothenate--cysteine ligase CoaBC	K13038	coaBC, dfp; phosphopantothenoylcysteine decarboxylase / phosphopantothenate---cysteine ligase	[EC:4.1.1.36 6.3.2.5]	Pantothenate and CoA biosynthesis	Metabolism of cofactors and vitamins	Metabolism	GO:0010181	molecular_function	FMN binding
OG0001338	bifunctional phosphopantothenoylcysteine decarboxylase/phosphopantothenate--cysteine ligase CoaBC	K13038	coaBC, dfp; phosphopantothenoylcysteine decarboxylase / phosphopantothenate---cysteine ligase	[EC:4.1.1.36 6.3.2.5]	Pantothenate and CoA biosynthesis	Metabolism of cofactors and vitamins	Metabolism	GO:0015941	biological_process	pantothenate catabolic process
OG0001338	bifunctional phosphopantothenoylcysteine decarboxylase/phosphopantothenate--cysteine ligase CoaBC	K13038	coaBC, dfp; phosphopantothenoylcysteine decarboxylase / phosphopantothenate---cysteine ligase	[EC:4.1.1.36 6.3.2.5]	Pantothenate and CoA biosynthesis	Metabolism of cofactors and vitamins	Metabolism	GO:0072521	biological_process	purine-containing compound metabolic process
OG0001338	bifunctional phosphopantothenoylcysteine decarboxylase/phosphopantothenate--cysteine ligase CoaBC	K13038	coaBC, dfp; phosphopantothenoylcysteine decarboxylase / phosphopantothenate---cysteine ligase	[EC:4.1.1.36 6.3.2.5]	Pantothenate and CoA biosynthesis	Metabolism of cofactors and vitamins	Metabolism	GO:0033865	biological_process	nucleoside bisphosphate metabolic process
OG0001338	bifunctional phosphopantothenoylcysteine decarboxylase/phosphopantothenate--cysteine ligase CoaBC	K13038	coaBC, dfp; phosphopantothenoylcysteine decarboxylase / phosphopantothenate---cysteine ligase	[EC:4.1.1.36 6.3.2.5]	Pantothenate and CoA biosynthesis	Metabolism of cofactors and vitamins	Metabolism	GO:0033866	biological_process	nucleoside bisphosphate biosynthetic process
OG0001338	bifunctional phosphopantothenoylcysteine decarboxylase/phosphopantothenate--cysteine ligase CoaBC	K13038	coaBC, dfp; phosphopantothenoylcysteine decarboxylase / phosphopantothenate---cysteine ligase	[EC:4.1.1.36 6.3.2.5]	Pantothenate and CoA biosynthesis	Metabolism of cofactors and vitamins	Metabolism	GO:0072522	biological_process	purine-containing compound biosynthetic process
OG0001338	bifunctional phosphopantothenoylcysteine decarboxylase/phosphopantothenate--cysteine ligase CoaBC	K13038	coaBC, dfp; phosphopantothenoylcysteine decarboxylase / phosphopantothenate---cysteine ligase	[EC:4.1.1.36 6.3.2.5]	Pantothenate and CoA biosynthesis	Metabolism of cofactors and vitamins	Metabolism	GO:1901137	biological_process	carbohydrate derivative biosynthetic process
OG0001338	bifunctional phosphopantothenoylcysteine decarboxylase/phosphopantothenate--cysteine ligase CoaBC	K13038	coaBC, dfp; phosphopantothenoylcysteine decarboxylase / phosphopantothenate---cysteine ligase	[EC:4.1.1.36 6.3.2.5]	Pantothenate and CoA biosynthesis	Metabolism of cofactors and vitamins	Metabolism	GO:1901265	molecular_function	nucleoside phosphate binding
OG0001338	bifunctional phosphopantothenoylcysteine decarboxylase/phosphopantothenate--cysteine ligase CoaBC	K13038	coaBC, dfp; phosphopantothenoylcysteine decarboxylase / phosphopantothenate---cysteine ligase	[EC:4.1.1.36 6.3.2.5]	Pantothenate and CoA biosynthesis	Metabolism of cofactors and vitamins	Metabolism	GO:0044237	biological_process	cellular metabolic process
OG0001338	bifunctional phosphopantothenoylcysteine decarboxylase/phosphopantothenate--cysteine ligase CoaBC	K13038	coaBC, dfp; phosphopantothenoylcysteine decarboxylase / phosphopantothenate---cysteine ligase	[EC:4.1.1.36 6.3.2.5]	Pantothenate and CoA biosynthesis	Metabolism of cofactors and vitamins	Metabolism	GO:0009165	biological_process	nucleotide biosynthetic process
OG0001338	bifunctional phosphopantothenoylcysteine decarboxylase/phosphopantothenate--cysteine ligase CoaBC	K13038	coaBC, dfp; phosphopantothenoylcysteine decarboxylase / phosphopantothenate---cysteine ligase	[EC:4.1.1.36 6.3.2.5]	Pantothenate and CoA biosynthesis	Metabolism of cofactors and vitamins	Metabolism	GO:0044238	biological_process	primary metabolic process
OG0001338	bifunctional phosphopantothenoylcysteine decarboxylase/phosphopantothenate--cysteine ligase CoaBC	K13038	coaBC, dfp; phosphopantothenoylcysteine decarboxylase / phosphopantothenate---cysteine ligase	[EC:4.1.1.36 6.3.2.5]	Pantothenate and CoA biosynthesis	Metabolism of cofactors and vitamins	Metabolism	GO:0034641	biological_process	cellular nitrogen compound metabolic process
OG0001338	bifunctional phosphopantothenoylcysteine decarboxylase/phosphopantothenate--cysteine ligase CoaBC	K13038	coaBC, dfp; phosphopantothenoylcysteine decarboxylase / phosphopantothenate---cysteine ligase	[EC:4.1.1.36 6.3.2.5]	Pantothenate and CoA biosynthesis	Metabolism of cofactors and vitamins	Metabolism	GO:0018130	biological_process	heterocycle biosynthetic process
OG0001338	bifunctional phosphopantothenoylcysteine decarboxylase/phosphopantothenate--cysteine ligase CoaBC	K13038	coaBC, dfp; phosphopantothenoylcysteine decarboxylase / phosphopantothenate---cysteine ligase	[EC:4.1.1.36 6.3.2.5]	Pantothenate and CoA biosynthesis	Metabolism of cofactors and vitamins	Metabolism	GO:1901135	biological_process	carbohydrate derivative metabolic process
OG0001338	bifunctional phosphopantothenoylcysteine decarboxylase/phosphopantothenate--cysteine ligase CoaBC	K13038	coaBC, dfp; phosphopantothenoylcysteine decarboxylase / phosphopantothenate---cysteine ligase	[EC:4.1.1.36 6.3.2.5]	Pantothenate and CoA biosynthesis	Metabolism of cofactors and vitamins	Metabolism	GO:0033875	biological_process	ribonucleoside bisphosphate metabolic process
OG0001338	bifunctional phosphopantothenoylcysteine decarboxylase/phosphopantothenate--cysteine ligase CoaBC	K13038	coaBC, dfp; phosphopantothenoylcysteine decarboxylase / phosphopantothenate---cysteine ligase	[EC:4.1.1.36 6.3.2.5]	Pantothenate and CoA biosynthesis	Metabolism of cofactors and vitamins	Metabolism	GO:0043603	biological_process	cellular amide metabolic process
OG0001338	bifunctional phosphopantothenoylcysteine decarboxylase/phosphopantothenate--cysteine ligase CoaBC	K13038	coaBC, dfp; phosphopantothenoylcysteine decarboxylase / phosphopantothenate---cysteine ligase	[EC:4.1.1.36 6.3.2.5]	Pantothenate and CoA biosynthesis	Metabolism of cofactors and vitamins	Metabolism	GO:0008150	biological_process	biological_process
OG0001338	bifunctional phosphopantothenoylcysteine decarboxylase/phosphopantothenate--cysteine ligase CoaBC	K13038	coaBC, dfp; phosphopantothenoylcysteine decarboxylase / phosphopantothenate---cysteine ligase	[EC:4.1.1.36 6.3.2.5]	Pantothenate and CoA biosynthesis	Metabolism of cofactors and vitamins	Metabolism	GO:0097367	molecular_function	carbohydrate derivative binding
OG0001338	bifunctional phosphopantothenoylcysteine decarboxylase/phosphopantothenate--cysteine ligase CoaBC	K13038	coaBC, dfp; phosphopantothenoylcysteine decarboxylase / phosphopantothenate---cysteine ligase	[EC:4.1.1.36 6.3.2.5]	Pantothenate and CoA biosynthesis	Metabolism of cofactors and vitamins	Metabolism	GO:0008152	biological_process	metabolic process
OG0001338	bifunctional phosphopantothenoylcysteine decarboxylase/phosphopantothenate--cysteine ligase CoaBC	K13038	coaBC, dfp; phosphopantothenoylcysteine decarboxylase / phosphopantothenate---cysteine ligase	[EC:4.1.1.36 6.3.2.5]	Pantothenate and CoA biosynthesis	Metabolism of cofactors and vitamins	Metabolism	GO:0044248	biological_process	cellular catabolic process
OG0001338	bifunctional phosphopantothenoylcysteine decarboxylase/phosphopantothenate--cysteine ligase CoaBC	K13038	coaBC, dfp; phosphopantothenoylcysteine decarboxylase / phosphopantothenate---cysteine ligase	[EC:4.1.1.36 6.3.2.5]	Pantothenate and CoA biosynthesis	Metabolism of cofactors and vitamins	Metabolism	GO:0044249	biological_process	cellular biosynthetic process
OG0001338	bifunctional phosphopantothenoylcysteine decarboxylase/phosphopantothenate--cysteine ligase CoaBC	K13038	coaBC, dfp; phosphopantothenoylcysteine decarboxylase / phosphopantothenate---cysteine ligase	[EC:4.1.1.36 6.3.2.5]	Pantothenate and CoA biosynthesis	Metabolism of cofactors and vitamins	Metabolism	GO:0003674	molecular_function	molecular_function
OG0001338	bifunctional phosphopantothenoylcysteine decarboxylase/phosphopantothenate--cysteine ligase CoaBC	K13038	coaBC, dfp; phosphopantothenoylcysteine decarboxylase / phosphopantothenate---cysteine ligase	[EC:4.1.1.36 6.3.2.5]	Pantothenate and CoA biosynthesis	Metabolism of cofactors and vitamins	Metabolism	GO:0034654	biological_process	nucleobase-containing compound biosynthetic process
OG0001338	bifunctional phosphopantothenoylcysteine decarboxylase/phosphopantothenate--cysteine ligase CoaBC	K13038	coaBC, dfp; phosphopantothenoylcysteine decarboxylase / phosphopantothenate---cysteine ligase	[EC:4.1.1.36 6.3.2.5]	Pantothenate and CoA biosynthesis	Metabolism of cofactors and vitamins	Metabolism	GO:1901565	biological_process	organonitrogen compound catabolic process
OG0001338	bifunctional phosphopantothenoylcysteine decarboxylase/phosphopantothenate--cysteine ligase CoaBC	K13038	coaBC, dfp; phosphopantothenoylcysteine decarboxylase / phosphopantothenate---cysteine ligase	[EC:4.1.1.36 6.3.2.5]	Pantothenate and CoA biosynthesis	Metabolism of cofactors and vitamins	Metabolism	GO:0009056	biological_process	catabolic process
OG0001338	bifunctional phosphopantothenoylcysteine decarboxylase/phosphopantothenate--cysteine ligase CoaBC	K13038	coaBC, dfp; phosphopantothenoylcysteine decarboxylase / phosphopantothenate---cysteine ligase	[EC:4.1.1.36 6.3.2.5]	Pantothenate and CoA biosynthesis	Metabolism of cofactors and vitamins	Metabolism	GO:0006753	biological_process	nucleoside phosphate metabolic process
OG0001338	bifunctional phosphopantothenoylcysteine decarboxylase/phosphopantothenate--cysteine ligase CoaBC	K13038	coaBC, dfp; phosphopantothenoylcysteine decarboxylase / phosphopantothenate---cysteine ligase	[EC:4.1.1.36 6.3.2.5]	Pantothenate and CoA biosynthesis	Metabolism of cofactors and vitamins	Metabolism	GO:1901564	biological_process	organonitrogen compound metabolic process
OG0001338	bifunctional phosphopantothenoylcysteine decarboxylase/phosphopantothenate--cysteine ligase CoaBC	K13038	coaBC, dfp; phosphopantothenoylcysteine decarboxylase / phosphopantothenate---cysteine ligase	[EC:4.1.1.36 6.3.2.5]	Pantothenate and CoA biosynthesis	Metabolism of cofactors and vitamins	Metabolism	GO:0009058	biological_process	biosynthetic process
OG0001338	bifunctional phosphopantothenoylcysteine decarboxylase/phosphopantothenate--cysteine ligase CoaBC	K13038	coaBC, dfp; phosphopantothenoylcysteine decarboxylase / phosphopantothenate---cysteine ligase	[EC:4.1.1.36 6.3.2.5]	Pantothenate and CoA biosynthesis	Metabolism of cofactors and vitamins	Metabolism	GO:1901566	biological_process	organonitrogen compound biosynthetic process
OG0001338	bifunctional phosphopantothenoylcysteine decarboxylase/phosphopantothenate--cysteine ligase CoaBC	K13038	coaBC, dfp; phosphopantothenoylcysteine decarboxylase / phosphopantothenate---cysteine ligase	[EC:4.1.1.36 6.3.2.5]	Pantothenate and CoA biosynthesis	Metabolism of cofactors and vitamins	Metabolism	GO:0016874	molecular_function	ligase activity
OG0001338	bifunctional phosphopantothenoylcysteine decarboxylase/phosphopantothenate--cysteine ligase CoaBC	K13038	coaBC, dfp; phosphopantothenoylcysteine decarboxylase / phosphopantothenate---cysteine ligase	[EC:4.1.1.36 6.3.2.5]	Pantothenate and CoA biosynthesis	Metabolism of cofactors and vitamins	Metabolism	GO:0042219	biological_process	cellular modified amino acid catabolic process
OG0001338	bifunctional phosphopantothenoylcysteine decarboxylase/phosphopantothenate--cysteine ligase CoaBC	K13038	coaBC, dfp; phosphopantothenoylcysteine decarboxylase / phosphopantothenate---cysteine ligase	[EC:4.1.1.36 6.3.2.5]	Pantothenate and CoA biosynthesis	Metabolism of cofactors and vitamins	Metabolism	GO:0019693	biological_process	ribose phosphate metabolic process
OG0001338	bifunctional phosphopantothenoylcysteine decarboxylase/phosphopantothenate--cysteine ligase CoaBC	K13038	coaBC, dfp; phosphopantothenoylcysteine decarboxylase / phosphopantothenate---cysteine ligase	[EC:4.1.1.36 6.3.2.5]	Pantothenate and CoA biosynthesis	Metabolism of cofactors and vitamins	Metabolism	GO:0019438	biological_process	aromatic compound biosynthetic process
OG0001338	bifunctional phosphopantothenoylcysteine decarboxylase/phosphopantothenate--cysteine ligase CoaBC	K13038	coaBC, dfp; phosphopantothenoylcysteine decarboxylase / phosphopantothenate---cysteine ligase	[EC:4.1.1.36 6.3.2.5]	Pantothenate and CoA biosynthesis	Metabolism of cofactors and vitamins	Metabolism	GO:0034030	biological_process	ribonucleoside bisphosphate biosynthetic process
OG0001338	bifunctional phosphopantothenoylcysteine decarboxylase/phosphopantothenate--cysteine ligase CoaBC	K13038	coaBC, dfp; phosphopantothenoylcysteine decarboxylase / phosphopantothenate---cysteine ligase	[EC:4.1.1.36 6.3.2.5]	Pantothenate and CoA biosynthesis	Metabolism of cofactors and vitamins	Metabolism	GO:0006766	biological_process	vitamin metabolic process
OG0001338	bifunctional phosphopantothenoylcysteine decarboxylase/phosphopantothenate--cysteine ligase CoaBC	K13038	coaBC, dfp; phosphopantothenoylcysteine decarboxylase / phosphopantothenate---cysteine ligase	[EC:4.1.1.36 6.3.2.5]	Pantothenate and CoA biosynthesis	Metabolism of cofactors and vitamins	Metabolism	GO:0044271	biological_process	cellular nitrogen compound biosynthetic process
OG0001338	bifunctional phosphopantothenoylcysteine decarboxylase/phosphopantothenate--cysteine ligase CoaBC	K13038	coaBC, dfp; phosphopantothenoylcysteine decarboxylase / phosphopantothenate---cysteine ligase	[EC:4.1.1.36 6.3.2.5]	Pantothenate and CoA biosynthesis	Metabolism of cofactors and vitamins	Metabolism	GO:0006767	biological_process	water-soluble vitamin metabolic process
OG0001338	bifunctional phosphopantothenoylcysteine decarboxylase/phosphopantothenate--cysteine ligase CoaBC	K13038	coaBC, dfp; phosphopantothenoylcysteine decarboxylase / phosphopantothenate---cysteine ligase	[EC:4.1.1.36 6.3.2.5]	Pantothenate and CoA biosynthesis	Metabolism of cofactors and vitamins	Metabolism	GO:0016879	molecular_function	ligase activity, forming carbon-nitrogen bonds
OG0001338	bifunctional phosphopantothenoylcysteine decarboxylase/phosphopantothenate--cysteine ligase CoaBC	K13038	coaBC, dfp; phosphopantothenoylcysteine decarboxylase / phosphopantothenate---cysteine ligase	[EC:4.1.1.36 6.3.2.5]	Pantothenate and CoA biosynthesis	Metabolism of cofactors and vitamins	Metabolism	GO:0003824	molecular_function	catalytic activity
OG0001338	bifunctional phosphopantothenoylcysteine decarboxylase/phosphopantothenate--cysteine ligase CoaBC	K13038	coaBC, dfp; phosphopantothenoylcysteine decarboxylase / phosphopantothenate---cysteine ligase	[EC:4.1.1.36 6.3.2.5]	Pantothenate and CoA biosynthesis	Metabolism of cofactors and vitamins	Metabolism	GO:1901293	biological_process	nucleoside phosphate biosynthetic process
OG0001338	bifunctional phosphopantothenoylcysteine decarboxylase/phosphopantothenate--cysteine ligase CoaBC	K13038	coaBC, dfp; phosphopantothenoylcysteine decarboxylase / phosphopantothenate---cysteine ligase	[EC:4.1.1.36 6.3.2.5]	Pantothenate and CoA biosynthesis	Metabolism of cofactors and vitamins	Metabolism	GO:0034032	biological_process	purine nucleoside bisphosphate metabolic process
OG0001338	bifunctional phosphopantothenoylcysteine decarboxylase/phosphopantothenate--cysteine ligase CoaBC	K13038	coaBC, dfp; phosphopantothenoylcysteine decarboxylase / phosphopantothenate---cysteine ligase	[EC:4.1.1.36 6.3.2.5]	Pantothenate and CoA biosynthesis	Metabolism of cofactors and vitamins	Metabolism	GO:0005488	molecular_function	binding
OG0001338	bifunctional phosphopantothenoylcysteine decarboxylase/phosphopantothenate--cysteine ligase CoaBC	K13038	coaBC, dfp; phosphopantothenoylcysteine decarboxylase / phosphopantothenate---cysteine ligase	[EC:4.1.1.36 6.3.2.5]	Pantothenate and CoA biosynthesis	Metabolism of cofactors and vitamins	Metabolism	GO:0034033	biological_process	purine nucleoside bisphosphate biosynthetic process
OG0001338	bifunctional phosphopantothenoylcysteine decarboxylase/phosphopantothenate--cysteine ligase CoaBC	K13038	coaBC, dfp; phosphopantothenoylcysteine decarboxylase / phosphopantothenate---cysteine ligase	[EC:4.1.1.36 6.3.2.5]	Pantothenate and CoA biosynthesis	Metabolism of cofactors and vitamins	Metabolism	GO:0016881	molecular_function	acid-amino acid ligase activity
OG0001338	bifunctional phosphopantothenoylcysteine decarboxylase/phosphopantothenate--cysteine ligase CoaBC	K13038	coaBC, dfp; phosphopantothenoylcysteine decarboxylase / phosphopantothenate---cysteine ligase	[EC:4.1.1.36 6.3.2.5]	Pantothenate and CoA biosynthesis	Metabolism of cofactors and vitamins	Metabolism	GO:0044281	biological_process	small molecule metabolic process
OG0001338	bifunctional phosphopantothenoylcysteine decarboxylase/phosphopantothenate--cysteine ligase CoaBC	K13038	coaBC, dfp; phosphopantothenoylcysteine decarboxylase / phosphopantothenate---cysteine ligase	[EC:4.1.1.36 6.3.2.5]	Pantothenate and CoA biosynthesis	Metabolism of cofactors and vitamins	Metabolism	GO:0044282	biological_process	small molecule catabolic process
OG0001338	bifunctional phosphopantothenoylcysteine decarboxylase/phosphopantothenate--cysteine ligase CoaBC	K13038	coaBC, dfp; phosphopantothenoylcysteine decarboxylase / phosphopantothenate---cysteine ligase	[EC:4.1.1.36 6.3.2.5]	Pantothenate and CoA biosynthesis	Metabolism of cofactors and vitamins	Metabolism	GO:0006139	biological_process	nucleobase-containing compound metabolic process
OG0001338	bifunctional phosphopantothenoylcysteine decarboxylase/phosphopantothenate--cysteine ligase CoaBC	K13038	coaBC, dfp; phosphopantothenoylcysteine decarboxylase / phosphopantothenate---cysteine ligase	[EC:4.1.1.36 6.3.2.5]	Pantothenate and CoA biosynthesis	Metabolism of cofactors and vitamins	Metabolism	GO:0042365	biological_process	water-soluble vitamin catabolic process
OG0001338	bifunctional phosphopantothenoylcysteine decarboxylase/phosphopantothenate--cysteine ligase CoaBC	K13038	coaBC, dfp; phosphopantothenoylcysteine decarboxylase / phosphopantothenate---cysteine ligase	[EC:4.1.1.36 6.3.2.5]	Pantothenate and CoA biosynthesis	Metabolism of cofactors and vitamins	Metabolism	GO:0036094	molecular_function	small molecule binding
OG0001361	superoxide dismutase [Fe]	K04564	SOD2; superoxide dismutase, Fe-Mn family	[EC:1.15.1.1]	MAPK signaling pathway - fly	Signal transduction	Environmental Information Processing	GO:1990748	biological_process	cellular detoxification
OG0001361	superoxide dismutase [Fe]	K04564	SOD2; superoxide dismutase, Fe-Mn family	[EC:1.15.1.1]	MAPK signaling pathway - fly	Signal transduction	Environmental Information Processing	GO:0009987	biological_process	cellular process
OG0001361	superoxide dismutase [Fe]	K04564	SOD2; superoxide dismutase, Fe-Mn family	[EC:1.15.1.1]	MAPK signaling pathway - fly	Signal transduction	Environmental Information Processing	GO:0006979	biological_process	response to oxidative stress
OG0001361	superoxide dismutase [Fe]	K04564	SOD2; superoxide dismutase, Fe-Mn family	[EC:1.15.1.1]	MAPK signaling pathway - fly	Signal transduction	Environmental Information Processing	GO:0098754	biological_process	detoxification
OG0001361	superoxide dismutase [Fe]	K04564	SOD2; superoxide dismutase, Fe-Mn family	[EC:1.15.1.1]	MAPK signaling pathway - fly	Signal transduction	Environmental Information Processing	GO:0051716	biological_process	cellular response to stimulus
OG0001361	superoxide dismutase [Fe]	K04564	SOD2; superoxide dismutase, Fe-Mn family	[EC:1.15.1.1]	MAPK signaling pathway - fly	Signal transduction	Environmental Information Processing	GO:0044237	biological_process	cellular metabolic process
OG0001361	superoxide dismutase [Fe]	K04564	SOD2; superoxide dismutase, Fe-Mn family	[EC:1.15.1.1]	MAPK signaling pathway - fly	Signal transduction	Environmental Information Processing	GO:0072593	biological_process	reactive oxygen species metabolic process
OG0001361	superoxide dismutase [Fe]	K04564	SOD2; superoxide dismutase, Fe-Mn family	[EC:1.15.1.1]	MAPK signaling pathway - fly	Signal transduction	Environmental Information Processing	GO:0050896	biological_process	response to stimulus
OG0001361	superoxide dismutase [Fe]	K04564	SOD2; superoxide dismutase, Fe-Mn family	[EC:1.15.1.1]	MAPK signaling pathway - fly	Signal transduction	Environmental Information Processing	GO:0016209	molecular_function	antioxidant activity
OG0001361	superoxide dismutase [Fe]	K04564	SOD2; superoxide dismutase, Fe-Mn family	[EC:1.15.1.1]	MAPK signaling pathway - fly	Signal transduction	Environmental Information Processing	GO:0016721	molecular_function	oxidoreductase activity, acting on superoxide radicals as acceptor
OG0001361	superoxide dismutase [Fe]	K04564	SOD2; superoxide dismutase, Fe-Mn family	[EC:1.15.1.1]	MAPK signaling pathway - fly	Signal transduction	Environmental Information Processing	GO:0006801	biological_process	superoxide metabolic process
OG0001361	superoxide dismutase [Fe]	K04564	SOD2; superoxide dismutase, Fe-Mn family	[EC:1.15.1.1]	MAPK signaling pathway - fly	Signal transduction	Environmental Information Processing	GO:0033554	biological_process	cellular response to stress
OG0001361	superoxide dismutase [Fe]	K04564	SOD2; superoxide dismutase, Fe-Mn family	[EC:1.15.1.1]	MAPK signaling pathway - fly	Signal transduction	Environmental Information Processing	GO:0097237	biological_process	cellular response to toxic substance
OG0001361	superoxide dismutase [Fe]	K04564	SOD2; superoxide dismutase, Fe-Mn family	[EC:1.15.1.1]	MAPK signaling pathway - fly	Signal transduction	Environmental Information Processing	GO:0008150	biological_process	biological_process
OG0001361	superoxide dismutase [Fe]	K04564	SOD2; superoxide dismutase, Fe-Mn family	[EC:1.15.1.1]	MAPK signaling pathway - fly	Signal transduction	Environmental Information Processing	GO:0008152	biological_process	metabolic process
OG0001361	superoxide dismutase [Fe]	K04564	SOD2; superoxide dismutase, Fe-Mn family	[EC:1.15.1.1]	MAPK signaling pathway - fly	Signal transduction	Environmental Information Processing	GO:1901701	biological_process	cellular response to oxygen-containing compound
OG0001361	superoxide dismutase [Fe]	K04564	SOD2; superoxide dismutase, Fe-Mn family	[EC:1.15.1.1]	MAPK signaling pathway - fly	Signal transduction	Environmental Information Processing	GO:0046872	molecular_function	metal ion binding
OG0001361	superoxide dismutase [Fe]	K04564	SOD2; superoxide dismutase, Fe-Mn family	[EC:1.15.1.1]	MAPK signaling pathway - fly	Signal transduction	Environmental Information Processing	GO:1901700	biological_process	response to oxygen-containing compound
OG0001361	superoxide dismutase [Fe]	K04564	SOD2; superoxide dismutase, Fe-Mn family	[EC:1.15.1.1]	MAPK signaling pathway - fly	Signal transduction	Environmental Information Processing	GO:0003674	molecular_function	molecular_function
OG0001361	superoxide dismutase [Fe]	K04564	SOD2; superoxide dismutase, Fe-Mn family	[EC:1.15.1.1]	MAPK signaling pathway - fly	Signal transduction	Environmental Information Processing	GO:0071451	biological_process	cellular response to superoxide
OG0001361	superoxide dismutase [Fe]	K04564	SOD2; superoxide dismutase, Fe-Mn family	[EC:1.15.1.1]	MAPK signaling pathway - fly	Signal transduction	Environmental Information Processing	GO:0071450	biological_process	cellular response to oxygen radical
OG0001361	superoxide dismutase [Fe]	K04564	SOD2; superoxide dismutase, Fe-Mn family	[EC:1.15.1.1]	MAPK signaling pathway - fly	Signal transduction	Environmental Information Processing	GO:0043167	molecular_function	ion binding
OG0001361	superoxide dismutase [Fe]	K04564	SOD2; superoxide dismutase, Fe-Mn family	[EC:1.15.1.1]	MAPK signaling pathway - fly	Signal transduction	Environmental Information Processing	GO:0043169	molecular_function	cation binding
OG0001361	superoxide dismutase [Fe]	K04564	SOD2; superoxide dismutase, Fe-Mn family	[EC:1.15.1.1]	MAPK signaling pathway - fly	Signal transduction	Environmental Information Processing	GO:0009636	biological_process	response to toxic substance
OG0001361	superoxide dismutase [Fe]	K04564	SOD2; superoxide dismutase, Fe-Mn family	[EC:1.15.1.1]	MAPK signaling pathway - fly	Signal transduction	Environmental Information Processing	GO:0070887	biological_process	cellular response to chemical stimulus
OG0001361	superoxide dismutase [Fe]	K04564	SOD2; superoxide dismutase, Fe-Mn family	[EC:1.15.1.1]	MAPK signaling pathway - fly	Signal transduction	Environmental Information Processing	GO:0019430	biological_process	removal of superoxide radicals
OG0001361	superoxide dismutase [Fe]	K04564	SOD2; superoxide dismutase, Fe-Mn family	[EC:1.15.1.1]	MAPK signaling pathway - fly	Signal transduction	Environmental Information Processing	GO:0006950	biological_process	response to stress
OG0001361	superoxide dismutase [Fe]	K04564	SOD2; superoxide dismutase, Fe-Mn family	[EC:1.15.1.1]	MAPK signaling pathway - fly	Signal transduction	Environmental Information Processing	GO:0034599	biological_process	cellular response to oxidative stress
OG0001361	superoxide dismutase [Fe]	K04564	SOD2; superoxide dismutase, Fe-Mn family	[EC:1.15.1.1]	MAPK signaling pathway - fly	Signal transduction	Environmental Information Processing	GO:0016491	molecular_function	oxidoreductase activity
OG0001361	superoxide dismutase [Fe]	K04564	SOD2; superoxide dismutase, Fe-Mn family	[EC:1.15.1.1]	MAPK signaling pathway - fly	Signal transduction	Environmental Information Processing	GO:0042221	biological_process	response to chemical
OG0001361	superoxide dismutase [Fe]	K04564	SOD2; superoxide dismutase, Fe-Mn family	[EC:1.15.1.1]	MAPK signaling pathway - fly	Signal transduction	Environmental Information Processing	GO:0000302	biological_process	response to reactive oxygen species
OG0001361	superoxide dismutase [Fe]	K04564	SOD2; superoxide dismutase, Fe-Mn family	[EC:1.15.1.1]	MAPK signaling pathway - fly	Signal transduction	Environmental Information Processing	GO:0000303	biological_process	response to superoxide
OG0001361	superoxide dismutase [Fe]	K04564	SOD2; superoxide dismutase, Fe-Mn family	[EC:1.15.1.1]	MAPK signaling pathway - fly	Signal transduction	Environmental Information Processing	GO:0004784	molecular_function	superoxide dismutase activity
OG0001361	superoxide dismutase [Fe]	K04564	SOD2; superoxide dismutase, Fe-Mn family	[EC:1.15.1.1]	MAPK signaling pathway - fly	Signal transduction	Environmental Information Processing	GO:0003824	molecular_function	catalytic activity
OG0001361	superoxide dismutase [Fe]	K04564	SOD2; superoxide dismutase, Fe-Mn family	[EC:1.15.1.1]	MAPK signaling pathway - fly	Signal transduction	Environmental Information Processing	GO:0005488	molecular_function	binding
OG0001361	superoxide dismutase [Fe]	K04564	SOD2; superoxide dismutase, Fe-Mn family	[EC:1.15.1.1]	MAPK signaling pathway - fly	Signal transduction	Environmental Information Processing	GO:0000305	biological_process	response to oxygen radical
OG0001361	superoxide dismutase [Fe]	K04564	SOD2; superoxide dismutase, Fe-Mn family	[EC:1.15.1.1]	MAPK signaling pathway - fly	Signal transduction	Environmental Information Processing	GO:0010035	biological_process	response to inorganic substance
OG0001361	superoxide dismutase [Fe]	K04564	SOD2; superoxide dismutase, Fe-Mn family	[EC:1.15.1.1]	MAPK signaling pathway - fly	Signal transduction	Environmental Information Processing	GO:0098869	biological_process	cellular oxidant detoxification
OG0001361	superoxide dismutase [Fe]	K04564	SOD2; superoxide dismutase, Fe-Mn family	[EC:1.15.1.1]	MAPK signaling pathway - fly	Signal transduction	Environmental Information Processing	GO:0062197	biological_process	cellular response to chemical stress
OG0001361	superoxide dismutase [Fe]	K04564	SOD2; superoxide dismutase, Fe-Mn family	[EC:1.15.1.1]	MAPK signaling pathway - fly	Signal transduction	Environmental Information Processing	GO:0034614	biological_process	cellular response to reactive oxygen species
OG0001361	superoxide dismutase [Fe]	K04564	SOD2; superoxide dismutase, Fe-Mn family	[EC:1.15.1.1]	FoxO signaling pathway	Signal transduction	Environmental Information Processing	GO:1990748	biological_process	cellular detoxification
OG0001361	superoxide dismutase [Fe]	K04564	SOD2; superoxide dismutase, Fe-Mn family	[EC:1.15.1.1]	FoxO signaling pathway	Signal transduction	Environmental Information Processing	GO:0009987	biological_process	cellular process
OG0001361	superoxide dismutase [Fe]	K04564	SOD2; superoxide dismutase, Fe-Mn family	[EC:1.15.1.1]	FoxO signaling pathway	Signal transduction	Environmental Information Processing	GO:0006979	biological_process	response to oxidative stress
OG0001361	superoxide dismutase [Fe]	K04564	SOD2; superoxide dismutase, Fe-Mn family	[EC:1.15.1.1]	FoxO signaling pathway	Signal transduction	Environmental Information Processing	GO:0098754	biological_process	detoxification
OG0001361	superoxide dismutase [Fe]	K04564	SOD2; superoxide dismutase, Fe-Mn family	[EC:1.15.1.1]	FoxO signaling pathway	Signal transduction	Environmental Information Processing	GO:0051716	biological_process	cellular response to stimulus
OG0001361	superoxide dismutase [Fe]	K04564	SOD2; superoxide dismutase, Fe-Mn family	[EC:1.15.1.1]	FoxO signaling pathway	Signal transduction	Environmental Information Processing	GO:0044237	biological_process	cellular metabolic process
OG0001361	superoxide dismutase [Fe]	K04564	SOD2; superoxide dismutase, Fe-Mn family	[EC:1.15.1.1]	FoxO signaling pathway	Signal transduction	Environmental Information Processing	GO:0072593	biological_process	reactive oxygen species metabolic process
OG0001361	superoxide dismutase [Fe]	K04564	SOD2; superoxide dismutase, Fe-Mn family	[EC:1.15.1.1]	FoxO signaling pathway	Signal transduction	Environmental Information Processing	GO:0050896	biological_process	response to stimulus
OG0001361	superoxide dismutase [Fe]	K04564	SOD2; superoxide dismutase, Fe-Mn family	[EC:1.15.1.1]	FoxO signaling pathway	Signal transduction	Environmental Information Processing	GO:0016209	molecular_function	antioxidant activity
OG0001361	superoxide dismutase [Fe]	K04564	SOD2; superoxide dismutase, Fe-Mn family	[EC:1.15.1.1]	FoxO signaling pathway	Signal transduction	Environmental Information Processing	GO:0016721	molecular_function	oxidoreductase activity, acting on superoxide radicals as acceptor
OG0001361	superoxide dismutase [Fe]	K04564	SOD2; superoxide dismutase, Fe-Mn family	[EC:1.15.1.1]	FoxO signaling pathway	Signal transduction	Environmental Information Processing	GO:0006801	biological_process	superoxide metabolic process
OG0001361	superoxide dismutase [Fe]	K04564	SOD2; superoxide dismutase, Fe-Mn family	[EC:1.15.1.1]	FoxO signaling pathway	Signal transduction	Environmental Information Processing	GO:0033554	biological_process	cellular response to stress
OG0001361	superoxide dismutase [Fe]	K04564	SOD2; superoxide dismutase, Fe-Mn family	[EC:1.15.1.1]	FoxO signaling pathway	Signal transduction	Environmental Information Processing	GO:0097237	biological_process	cellular response to toxic substance
OG0001361	superoxide dismutase [Fe]	K04564	SOD2; superoxide dismutase, Fe-Mn family	[EC:1.15.1.1]	FoxO signaling pathway	Signal transduction	Environmental Information Processing	GO:0008150	biological_process	biological_process
OG0001361	superoxide dismutase [Fe]	K04564	SOD2; superoxide dismutase, Fe-Mn family	[EC:1.15.1.1]	FoxO signaling pathway	Signal transduction	Environmental Information Processing	GO:0008152	biological_process	metabolic process
OG0001361	superoxide dismutase [Fe]	K04564	SOD2; superoxide dismutase, Fe-Mn family	[EC:1.15.1.1]	FoxO signaling pathway	Signal transduction	Environmental Information Processing	GO:1901701	biological_process	cellular response to oxygen-containing compound
OG0001361	superoxide dismutase [Fe]	K04564	SOD2; superoxide dismutase, Fe-Mn family	[EC:1.15.1.1]	FoxO signaling pathway	Signal transduction	Environmental Information Processing	GO:0046872	molecular_function	metal ion binding
OG0001361	superoxide dismutase [Fe]	K04564	SOD2; superoxide dismutase, Fe-Mn family	[EC:1.15.1.1]	FoxO signaling pathway	Signal transduction	Environmental Information Processing	GO:1901700	biological_process	response to oxygen-containing compound
OG0001361	superoxide dismutase [Fe]	K04564	SOD2; superoxide dismutase, Fe-Mn family	[EC:1.15.1.1]	FoxO signaling pathway	Signal transduction	Environmental Information Processing	GO:0003674	molecular_function	molecular_function
OG0001361	superoxide dismutase [Fe]	K04564	SOD2; superoxide dismutase, Fe-Mn family	[EC:1.15.1.1]	FoxO signaling pathway	Signal transduction	Environmental Information Processing	GO:0071451	biological_process	cellular response to superoxide
OG0001361	superoxide dismutase [Fe]	K04564	SOD2; superoxide dismutase, Fe-Mn family	[EC:1.15.1.1]	FoxO signaling pathway	Signal transduction	Environmental Information Processing	GO:0071450	biological_process	cellular response to oxygen radical
OG0001361	superoxide dismutase [Fe]	K04564	SOD2; superoxide dismutase, Fe-Mn family	[EC:1.15.1.1]	FoxO signaling pathway	Signal transduction	Environmental Information Processing	GO:0043167	molecular_function	ion binding
OG0001361	superoxide dismutase [Fe]	K04564	SOD2; superoxide dismutase, Fe-Mn family	[EC:1.15.1.1]	FoxO signaling pathway	Signal transduction	Environmental Information Processing	GO:0043169	molecular_function	cation binding
OG0001361	superoxide dismutase [Fe]	K04564	SOD2; superoxide dismutase, Fe-Mn family	[EC:1.15.1.1]	FoxO signaling pathway	Signal transduction	Environmental Information Processing	GO:0009636	biological_process	response to toxic substance
OG0001361	superoxide dismutase [Fe]	K04564	SOD2; superoxide dismutase, Fe-Mn family	[EC:1.15.1.1]	FoxO signaling pathway	Signal transduction	Environmental Information Processing	GO:0070887	biological_process	cellular response to chemical stimulus
OG0001361	superoxide dismutase [Fe]	K04564	SOD2; superoxide dismutase, Fe-Mn family	[EC:1.15.1.1]	FoxO signaling pathway	Signal transduction	Environmental Information Processing	GO:0019430	biological_process	removal of superoxide radicals
OG0001361	superoxide dismutase [Fe]	K04564	SOD2; superoxide dismutase, Fe-Mn family	[EC:1.15.1.1]	FoxO signaling pathway	Signal transduction	Environmental Information Processing	GO:0006950	biological_process	response to stress
OG0001361	superoxide dismutase [Fe]	K04564	SOD2; superoxide dismutase, Fe-Mn family	[EC:1.15.1.1]	FoxO signaling pathway	Signal transduction	Environmental Information Processing	GO:0034599	biological_process	cellular response to oxidative stress
OG0001361	superoxide dismutase [Fe]	K04564	SOD2; superoxide dismutase, Fe-Mn family	[EC:1.15.1.1]	FoxO signaling pathway	Signal transduction	Environmental Information Processing	GO:0016491	molecular_function	oxidoreductase activity
OG0001361	superoxide dismutase [Fe]	K04564	SOD2; superoxide dismutase, Fe-Mn family	[EC:1.15.1.1]	FoxO signaling pathway	Signal transduction	Environmental Information Processing	GO:0042221	biological_process	response to chemical
OG0001361	superoxide dismutase [Fe]	K04564	SOD2; superoxide dismutase, Fe-Mn family	[EC:1.15.1.1]	FoxO signaling pathway	Signal transduction	Environmental Information Processing	GO:0000302	biological_process	response to reactive oxygen species
OG0001361	superoxide dismutase [Fe]	K04564	SOD2; superoxide dismutase, Fe-Mn family	[EC:1.15.1.1]	FoxO signaling pathway	Signal transduction	Environmental Information Processing	GO:0000303	biological_process	response to superoxide
OG0001361	superoxide dismutase [Fe]	K04564	SOD2; superoxide dismutase, Fe-Mn family	[EC:1.15.1.1]	FoxO signaling pathway	Signal transduction	Environmental Information Processing	GO:0004784	molecular_function	superoxide dismutase activity
OG0001361	superoxide dismutase [Fe]	K04564	SOD2; superoxide dismutase, Fe-Mn family	[EC:1.15.1.1]	FoxO signaling pathway	Signal transduction	Environmental Information Processing	GO:0003824	molecular_function	catalytic activity
OG0001361	superoxide dismutase [Fe]	K04564	SOD2; superoxide dismutase, Fe-Mn family	[EC:1.15.1.1]	FoxO signaling pathway	Signal transduction	Environmental Information Processing	GO:0005488	molecular_function	binding
OG0001361	superoxide dismutase [Fe]	K04564	SOD2; superoxide dismutase, Fe-Mn family	[EC:1.15.1.1]	FoxO signaling pathway	Signal transduction	Environmental Information Processing	GO:0000305	biological_process	response to oxygen radical
OG0001361	superoxide dismutase [Fe]	K04564	SOD2; superoxide dismutase, Fe-Mn family	[EC:1.15.1.1]	FoxO signaling pathway	Signal transduction	Environmental Information Processing	GO:0010035	biological_process	response to inorganic substance
OG0001361	superoxide dismutase [Fe]	K04564	SOD2; superoxide dismutase, Fe-Mn family	[EC:1.15.1.1]	FoxO signaling pathway	Signal transduction	Environmental Information Processing	GO:0098869	biological_process	cellular oxidant detoxification
OG0001361	superoxide dismutase [Fe]	K04564	SOD2; superoxide dismutase, Fe-Mn family	[EC:1.15.1.1]	FoxO signaling pathway	Signal transduction	Environmental Information Processing	GO:0062197	biological_process	cellular response to chemical stress
OG0001361	superoxide dismutase [Fe]	K04564	SOD2; superoxide dismutase, Fe-Mn family	[EC:1.15.1.1]	FoxO signaling pathway	Signal transduction	Environmental Information Processing	GO:0034614	biological_process	cellular response to reactive oxygen species
OG0001361	superoxide dismutase [Fe]	K04564	SOD2; superoxide dismutase, Fe-Mn family	[EC:1.15.1.1]	Peroxisome	Transport and catabolism	Cellular Processes	GO:1990748	biological_process	cellular detoxification
OG0001361	superoxide dismutase [Fe]	K04564	SOD2; superoxide dismutase, Fe-Mn family	[EC:1.15.1.1]	Peroxisome	Transport and catabolism	Cellular Processes	GO:0009987	biological_process	cellular process
OG0001361	superoxide dismutase [Fe]	K04564	SOD2; superoxide dismutase, Fe-Mn family	[EC:1.15.1.1]	Peroxisome	Transport and catabolism	Cellular Processes	GO:0006979	biological_process	response to oxidative stress
OG0001361	superoxide dismutase [Fe]	K04564	SOD2; superoxide dismutase, Fe-Mn family	[EC:1.15.1.1]	Peroxisome	Transport and catabolism	Cellular Processes	GO:0098754	biological_process	detoxification
OG0001361	superoxide dismutase [Fe]	K04564	SOD2; superoxide dismutase, Fe-Mn family	[EC:1.15.1.1]	Peroxisome	Transport and catabolism	Cellular Processes	GO:0051716	biological_process	cellular response to stimulus
OG0001361	superoxide dismutase [Fe]	K04564	SOD2; superoxide dismutase, Fe-Mn family	[EC:1.15.1.1]	Peroxisome	Transport and catabolism	Cellular Processes	GO:0044237	biological_process	cellular metabolic process
OG0001361	superoxide dismutase [Fe]	K04564	SOD2; superoxide dismutase, Fe-Mn family	[EC:1.15.1.1]	Peroxisome	Transport and catabolism	Cellular Processes	GO:0072593	biological_process	reactive oxygen species metabolic process
OG0001361	superoxide dismutase [Fe]	K04564	SOD2; superoxide dismutase, Fe-Mn family	[EC:1.15.1.1]	Peroxisome	Transport and catabolism	Cellular Processes	GO:0050896	biological_process	response to stimulus
OG0001361	superoxide dismutase [Fe]	K04564	SOD2; superoxide dismutase, Fe-Mn family	[EC:1.15.1.1]	Peroxisome	Transport and catabolism	Cellular Processes	GO:0016209	molecular_function	antioxidant activity
OG0001361	superoxide dismutase [Fe]	K04564	SOD2; superoxide dismutase, Fe-Mn family	[EC:1.15.1.1]	Peroxisome	Transport and catabolism	Cellular Processes	GO:0016721	molecular_function	oxidoreductase activity, acting on superoxide radicals as acceptor
[truncated: 5,930 more rows]
